# Supplementary material for: Profiling the bloodstream form and procyclic form Trypanosoma brucei cell cycle using single-cell transcriptomics
Source: eLife journal article supplement (doi:10.7554/elife.86325), 2023-05-11
Supplement: supp [file elife-86325-supp-v1.zip]

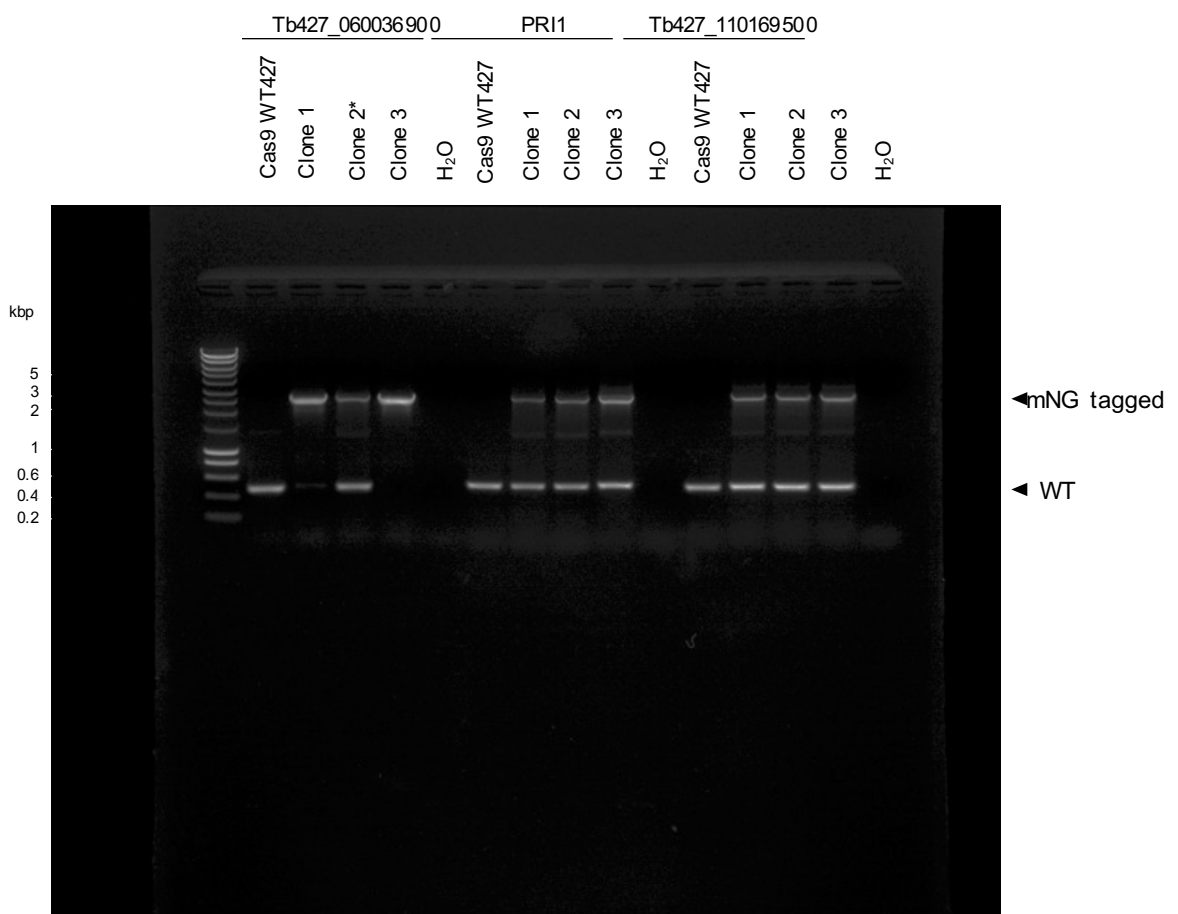

Uncropped gel - PCR detection of integrated mNG tag fragments for Tb427\_060036900 (3,406 bp), PRI1/Tb427\_080028700 (3,036 bp) and Tb427\_110169500 (3,015 bp). Lower band indicates the WT without an inserted tag for Tb427\_060036900 (484 bp), PRI1/Tb427\_080028700 (498 bp) and Tb427\_110169500 (477 bp). \* indicates fluorescence could not be detected for this heterozygous Tb427\_060036900::mNG clone.
