# Supplementary material for: Profiling the bloodstream form and procyclic form Trypanosoma brucei cell cycle using single-cell transcriptomics
Source: eLife journal article supplement (doi:10.7554/elife.86325), 2023-05-11
Supplement: supp [file elife-86325-supp-v1.zip]

## PCF

## BSF

Tb427\_070020200 (CYC8)

Tb427\_070020200 (CYC8)

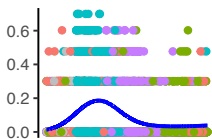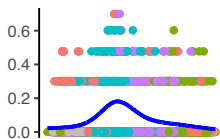

Tb427\_110012500 (NA)

Tb427\_110012500 (NA)

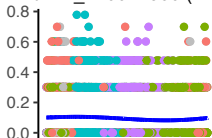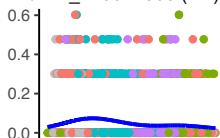

Tb427\_110158100 (CYC9)

Tb427\_110158100 (CYC9)

log10(count + 1)

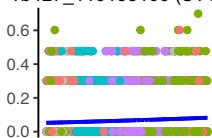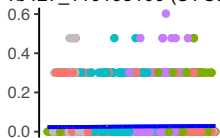

Tb427\_110158600 (CYC4)

Tb427\_110158600 (CYC4)

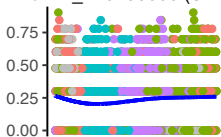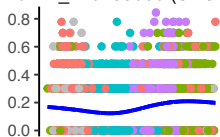

Tb427\_110187000 (CYC6)

Tb427\_110187000 (CYC6)

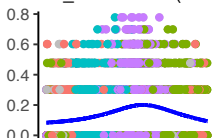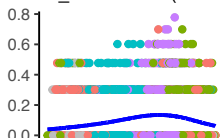

pseudotime

pseudotime

pseudotime

pseudotime
