# Supplementary material for: Profiling the bloodstream form and procyclic form Trypanosoma brucei cell cycle using single-cell transcriptomics
Source: eLife journal article supplement (doi:10.7554/elife.86325), 2023-05-11

A

Proteomics (Benz)

EG1 LG1 ES LS G2M

PCF CCR proteins (n=118)

scaled protein levels

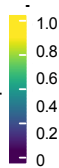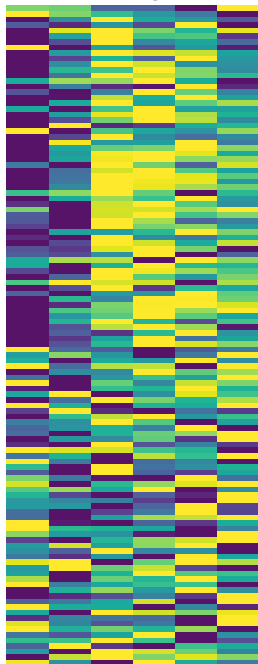

B

Proteomics (Benz)

EG1 LG1 ES LS G2M

BSF CCR proteins (n=112)

scaled protein levels

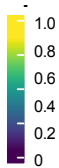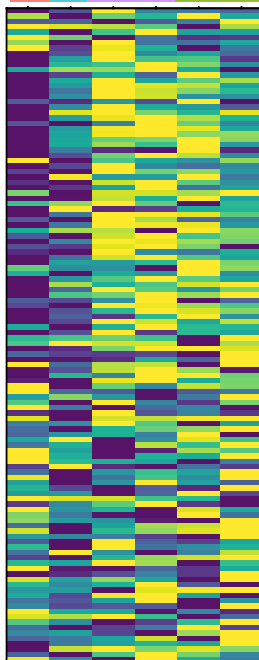

C

CIF2

Tb427\_09005100

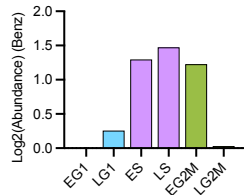

PSP1

Tb427\_10090100

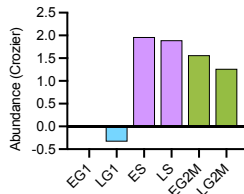

Tb427\_100096800

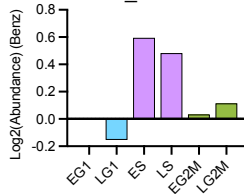

Supplement: supp [file elife-86325-supp-v1.zip]
