# Supplementary material for: Profiling the bloodstream form and procyclic form Trypanosoma brucei cell cycle using single-cell transcriptomics
Source: eLife. 2023 May 11;12:e86325. doi: 10.7554/eLife.86325 (PMC10212563; doi:10.7554/eLife.86325)
Supplement: Supplementary file 1. — (Tab 1) Genes used for BSF and PCF gating. (Tab 2) Results of BSF and PCF gating. (Tab 3) scRNA-seq sample summary. (Tab 4) Variable genes per sample. (Tab 5) Cell cycle phase markers used for labelling. [file elife-86325-supp1.xlsx]

## Sheet: Life cyce form marker genes
BSF and PCF marker genes were selected by comparing two bulk-RNA-seq datasets for differentially experessed genes (p <0.05, FC >2).
(Jensen et al 2014 BMC genomics, Naguleswaran et al 2018 BMC genomics)
Marker genes were only used if detected in between 20% and 75% of cells in scRNA-seq data (highlighted green)
	BSF			PCF
	Markers	Cell_proportion		Markers	Cell_proportion
	Tb427-000174700	0.0314476		Tb427-010012400	0.0720627
	Tb427-000174800	0.024427		Tb427-010015900	0.701538
	Tb427-000174900	0.0176385		Tb427-010016700	0.723876
	Tb427-000175100	0.0339426		Tb427-010016800	0.79942
	Tb427-000175300	0.0198433		Tb427-010016900	0.370351
	Tb427-000175400	0.0194372		Tb427-010021100	0.0127647
	Tb427-000312000	0.018799		Tb427-010028200	0.510299
	Tb427-000485100	0.00655643		Tb427-010029700	0.154801
	Tb427-000668800	0.00516391		Tb427-020010600	0.222628
	Tb427-010006500	0.343835		Tb427-020019500	0.704903
	Tb427-010024000	0.0247171		Tb427-020022000	0.152945
	Tb427-010024200	0.000290107		Tb427-020022500	0.388628
	Tb427-010032500	0.0396287		Tb427-030006700	0.234871
	Tb427-010032700	0.0356252		Tb427-030013500	0.650305
	Tb427-010032800	0.00191471		Tb427-030013800	0.255933
	Tb427-020007000	0.00365535		Tb427-030016600	0.471366
	Tb427-020007800	0.223905		Tb427-030017600	0.575515
	Tb427-020013900	0.0056861		Tb427-030019100	0.334494
	Tb427-020014100	0.00481578		Tb427-030020700	0.349579
	Tb427-020014300	0.0016246		Tb427-030021200	0.274906
	Tb427-020015900	0.00110241		Tb427-030021500	0.412417
	Tb427-020016000	0.0330142		Tb427-030037400	0.235625
	Tb427-020021000	0.13577		Tb427-030041700	0.106121
	Tb427-020021900	0.331303		Tb427-030041800	0.390484
	Tb427-020031600	0.585669		Tb427-030045600	0.126313
	Tb427-020032300	0.0928924		Tb427-030048400	0.424253
	Tb427-020032400	0.00168262		Tb427-030049900	0.182942
	Tb427-020032600	0.00104439		Tb427-040015900	0.297824
	Tb427-020032700	0.0111981		Tb427-040026600	0.315231
	Tb427-020032900	0.0158399		Tb427-040029100	0.0590659
	Tb427-030005100	0.0147955		Tb427-040037800	0.272817
	Tb427-030005200	0.067479		Tb427-040038300	0.570815
	Tb427-030005300	0.00829707		Tb427-040042400	0.749927
	Tb427-030005400	0.0426458		Tb427-040043500	0.0655643
	Tb427-030005500	0.131767		Tb427-040049300	0.355033
	Tb427-030005700	0.138787		Tb427-040050800	0.556484
	Tb427-030005800	0.19884		Tb427-040052800	0.509022
	Tb427-030014400	0.0391065		Tb427-050008600	0.529504
	Tb427-030014500	0.0199014		Tb427-050009400	0.29794
	Tb427-030014600	0.0118364		Tb427-050012200	0.197563
	Tb427-030025000	0.00110241		Tb427-050014000	0.396925
	Tb427-030026500	0.00678851		Tb427-050015300	0.368494
	Tb427-030026700	0.126429		Tb427-050016800	0.446011
	Tb427-030034400	0.122077		Tb427-050020700	0.0402089
	Tb427-030041500	0.156484		Tb427-050022900	0.468523
	Tb427-030043600	0.220888		Tb427-050025700	0.147897
	Tb427-030044000	0.235973		Tb427-050028800	0.467015
	Tb427-030044100	0.0937627		Tb427-050032000	0.243458
	Tb427-030044900	0.150914		Tb427-050035800	0.453844
	Tb427-030045400	0.352422		Tb427-050036900	0.169307
	Tb427-030045900	0.138323		Tb427-050037400	0.306295
	Tb427-030050600	0.231448		Tb427-050037800	0.0794894
	Tb427-030054300	0.452277		Tb427-050039400	0.239629
	Tb427-030060100	0.132985		Tb427-060008300	0.744589
	Tb427-030060200	0.0154337		Tb427-060008400	0.578648
	Tb427-040010000	0.152248		Tb427-060018100	0.824949
	Tb427-040014600	0.271482		Tb427-060018600	0.236496
	Tb427-040018700	0.13403		Tb427-060023100	0.276008
	Tb427-040026300	0.219959		Tb427-060025400	0.654076
	Tb427-040030000	0.217929		Tb427-060032500	0.50177
	Tb427-040036800	0.10734		Tb427-060042300	0.741108
	Tb427-040037600	0.161358		Tb427-060042400	0.663417
	Tb427-040039100	0.000928343		Tb427-060043000	0.570061
	Tb427-040042700	0.0925442		Tb427-060046200	0.348245
	Tb427-040042900	0.222454		Tb427-060054900	0.287728
	Tb427-040047200	0.0626052		Tb427-070005700	0.360139
	Tb427-040047300	0.218451		Tb427-070011800	0.381549
	Tb427-040047500	0.0923702		Tb427-070019000	0.423267
	Tb427-040047600	0.100609		Tb427-070022300	0.137569
	Tb427-040048500	0.126719		Tb427-070026700	0.40412
	Tb427-040048900	0.321671		Tb427-070030900	0.564723
	Tb427-040052000	0.170467		Tb427-070031500	0.581549
	Tb427-040054100	0.135654		Tb427-070035000	0.364085
	Tb427-050007900	0.03255		Tb427-070035500	0.101131
	Tb427-050008200	0.0682913		Tb427-070039700	0.387351
	Tb427-050010800	0.376849		Tb427-070041200	0.391587
	Tb427-050011000	0.332811		Tb427-070046000	0.413809
	Tb427-050018500	0.06481		Tb427-070046100	0.581201
	Tb427-050019500	0.0147955		Tb427-070049300	0.422802
	Tb427-050019900	0.00475776		Tb427-070051200	0.563446
	Tb427-050020100	0.000696258		Tb427-070065800	0.205918
	Tb427-050020200	0.00133449		Tb427-070065900	0.00632434
	Tb427-050046900	0.106643		Tb427-070066000	0.231912
	Tb427-050053300	0.0277923		Tb427-070075200	0.176037
	Tb427-050053500	0.13078		Tb427-070077500	0.373716
	Tb427-050053700	0.00313316		Tb427-070078200	0.334958
	Tb427-060007500	0.0562228		Tb427-070081800	0.486452
	Tb427-060008200	0.165999		Tb427-070082300	0.315753
	Tb427-060009000	0.603887		Tb427-080013500	0.590136
	Tb427-060016600	0.119466		Tb427-080017200	0.143255
	Tb427-060036300	0.108674		Tb427-080020600	0.121961
	Tb427-060041100	0.0816362		Tb427-080020700	0.657035
	Tb427-070005400	0.190194		Tb427-080021700	0.456977
	Tb427-070006600	0.118364		Tb427-080026000	0.129968
	Tb427-070008100	0.138381		Tb427-080028600	0.515869
	Tb427-070010100	0.19884		Tb427-080044900	0.167856
	Tb427-070016800	0.0148535		Tb427-080056500	0.864926
	Tb427-070031000	0.566173		Tb427-080059800	0.182478
	Tb427-070037200	0.239977		Tb427-080061800	0.449782
	Tb427-070047700	0.0550624		Tb427-080065500	0.350334
	Tb427-070048000	0.100667		Tb427-080066800	0.589324
	Tb427-070050400	0.702002		Tb427-080067400	0.479083
	Tb427-070066500	0.0275602		Tb427-080069800	0.215144
	Tb427-070066700	0.0852335		Tb427-080072100	0.590775
	Tb427-070066800	0.0387583		Tb427-080073800	0.679954
	Tb427-070070700	0.0761822		Tb427-080077500	0.32405
	Tb427-070071600	0.159269		Tb427-080080100	0.4604
	Tb427-070071700	0.121323		Tb427-080081800	0.262025
	Tb427-070072000	0.104555		Tb427-080082100	0.349637
	Tb427-070075300	0.280476		Tb427-080082400	0.0771105
	Tb427-070082400	0.0950972		Tb427-080088500	0.282449
	Tb427-080005000	0.0111981		Tb427-090006700	0.374761
	Tb427-080009500	0.0259356		Tb427-090009200	0.168552
	Tb427-080019400	0.0139832		Tb427-090019500	0.297302
	Tb427-080022300	0.127357		Tb427-090026300	0.0854076
	Tb427-080023700	0.305599		Tb427-090028400	0.670554
	Tb427-080027400	0.0872063		Tb427-090031800	0.774761
	Tb427-080029300	0.0483319		Tb427-090032000	0.607775
	Tb427-080029800	0.23255		Tb427-090032300	0.714708
	Tb427-080042200	0.131012		Tb427-090032400	0.202031
	Tb427-080042300	0.125674		Tb427-090032800	0.470032
	Tb427-080042400	0.12875		Tb427-090042800	0.282042
	Tb427-080044200	0.0615608		Tb427-090044400	0.346388
	Tb427-080045400	0.119234		Tb427-090044700	0.444096
	Tb427-080050100	0.261213		Tb427-090049500	0.262779
	Tb427-080053500	0.0878445		Tb427-090052700	0.329852
	Tb427-080054000	0.205164		Tb427-090053400	0.0482158
	Tb427-080056100	0.16159		Tb427-090054600	0.257383
	Tb427-080056700	0.135944		Tb427-090066200	0.790484
	Tb427-080064500	0.0581955		Tb427-090071400	0.591065
	Tb427-080073400	0.123064		Tb427-090073100	0.706005
	Tb427-080073500	0.171976		Tb427-090078800	0.277459
	Tb427-080073600	0.191471		Tb427-090081400	0.167044
	Tb427-080073900	0.319814		Tb427-090084100	0.59472
	Tb427-080078400	0.0380041		Tb427-090084500	0.197737
	Tb427-080079000	0.150798		Tb427-100005200	0.316101
	Tb427-080079100	0.100899		Tb427-100006200	0.441137
	Tb427-080079200	0.0793734		Tb427-100008400	0.488657
	Tb427-080083300	0.123528		Tb427-100009800	0.219089
	Tb427-080085400	0.256107		Tb427-100010200	0.175515
	Tb427-080085700	0.0814041		Tb427-100014800	0.387583
	Tb427-080086000	0.148361		Tb427-100018000	0.443922
	Tb427-080088100	0.104555		Tb427-100018700	0.602205
	Tb427-080088300	0.148535		Tb427-100029900	0.414099
	Tb427-080088800	0.429417		Tb427-100035500	0.264752
	Tb427-090005900	0.246649		Tb427-100037100	0.788628
	Tb427-090026000	0.299913		Tb427-100037900	0.145228
	Tb427-090029400	0.180969		Tb427-100041000	0.432376
	Tb427-090041000	0.0581375		Tb427-100046700	0.249492
	Tb427-090041100	0.040499		Tb427-100047100	0.34575
	Tb427-090041200	0.00707862		Tb427-100052900	0.28593
	Tb427-090041300	0.000928343		Tb427-100056300	0.188396
	Tb427-090041800	0.00104439		Tb427-100061700	0.22286
	Tb427-090042300	0.121323		Tb427-100066200	0.338787
	Tb427-090048000	0.179402		Tb427-100077800	0.457905
	Tb427-090053200	0.105599		Tb427-100080100	0.713026
	Tb427-090061000	0.383696		Tb427-100083600	0.310705
	Tb427-090065400	0.265042		Tb427-100092100	0.583754
	Tb427-090067800	0.175457		Tb427-100094100	0.0144473
	Tb427-090077100	0.200058		Tb427-100098000	0.797041
	Tb427-090077900	0.467131		Tb427-100106800	0.743545
	Tb427-090081800	0.187757		Tb427-100109200	0.560603
	Tb427-090092200	0.119582		Tb427-100112000	0.216652
	Tb427-090092300	0.0670728		Tb427-100112200	0.214737
	Tb427-100013000	0.109661		Tb427-100114400	0.286684
	Tb427-100015100	0.18886		Tb427-100119300	0.29063
	Tb427-100015200	0.293763		Tb427-100122100	0.45924
	Tb427-100015300	0.379925		Tb427-100129800	0.2311
	Tb427-100020900	0.0769365		Tb427-100130000	0.574645
	Tb427-100021000	0.0268059		Tb427-100132400	0.602437
	Tb427-100027500	0.171047		Tb427-100135600	0.75016
	Tb427-100028700	0.13635		Tb427-100140700	0.615202
	Tb427-100030700	0.0927183		Tb427-100156500	0.496258
	Tb427-100042100	0.0768204		Tb427-100160900	0.168959
	Tb427-100051900	0.17215		Tb427-100162700	0.699971
	Tb427-100061000	0.0330722		Tb427-100168600	0.156136
	Tb427-100061200	0.0322599		Tb427-110012100	0.691558
	Tb427-100072000	0.0178706		Tb427-110014900	0.623615
	Tb427-100077400	0.179692		Tb427-110017200	0.505773
	Tb427-100078900	0.474093		Tb427-110019000	0.499565
	Tb427-100092400	0.111401		Tb427-110029000	0.525152
	Tb427-100095400	0.109893		Tb427-110029600	0.418103
	Tb427-100101700	0.0106179		Tb427-110030700	0.158283
	Tb427-100101800	0.133565		Tb427-110031800	0.732521
	Tb427-100101900	0.021584		Tb427-110034300	0.409632
	Tb427-100102000	0.0118944		Tb427-110043200	0.170525
	Tb427-100127500	0.141398		Tb427-110045300	0.397447
	Tb427-100128300	0.342269		Tb427-110051900	0.662315
	Tb427-100128400	0.0855817		Tb427-110057900	0.567566
	Tb427-100143200	0.166232		Tb427-110060100	0.245257
	Tb427-100143700	0.0885408		Tb427-110060300	0.697476
	Tb427-100146000	0.495619		Tb427-110061100	0.244967
	Tb427-100149600	0.608123		Tb427-110063400	0.122947
	Tb427-100149900	0.284305		Tb427-110065400	0.197911
	Tb427-100157100	0.736118		Tb427-110066400	0.315927
	Tb427-100159100	0.0340006		Tb427-110066900	0.0032492
	Tb427-100159500	0.0248332		Tb427-110067000	0.4651
	Tb427-100168700	0.233072		Tb427-110067400	0.289237
	Tb427-110016800	0.251233		Tb427-110067700	0.625587
	Tb427-110019200	0.300203		Tb427-110071800	0.201567
	Tb427-110019500	0.110357		Tb427-110081600	0.35776
	Tb427-110028900	0.169829		Tb427-110081700	0.344706
	Tb427-110037300	0.197273		Tb427-110084000	0.480186
	Tb427-110043300	0.326603		Tb427-110085000	0.253786
	Tb427-110046100	0.0197853		Tb427-110086200	0.541572
	Tb427-110046200	0.0662605		Tb427-110108200	0.366173
	Tb427-110046300	0.059472		Tb427-110109100	0.289933
	Tb427-110046900	0.118712		Tb427-110124400	0.207659
	Tb427-110053700	0.199942		Tb427-110133300	0.777546
	Tb427-110055900	0.107514		Tb427-110134100	0.307862
	Tb427-110064300	0.141862		Tb427-110134800	0.36716
	Tb427-110074000	0.142269		Tb427-110136000	0.12904
	Tb427-110075700	0.210966		Tb427-110137100	0.189382
	Tb427-110079800	0.179518		Tb427-110168700	0.324224
	Tb427-110081800	0.855817		Tb427-110174100	0.195184
	Tb427-110082200	0.213983		Tb427-110181600	0.462895
	Tb427-110092100	0.282042		Tb427-110184400	0.267015
	Tb427-110093600	0.202669		Tb427-110184700	0.265506
	Tb427-110094600	0.13519		Tb427-110185400	0.249028
	Tb427-110097000	0.0286046		Tb427-110187100	0.627676
	Tb427-110097400	0.0100957		Tb427-110189200	0.152248
	Tb427-110097800	0.00348129
	Tb427-110097900	0.102466
	Tb427-110098000	0.0341746
	Tb427-110125100	0.0894111
	Tb427-110125800	0.111053
	Tb427-110133600	0.161706
	Tb427-110136700	0.00232086
	Tb427-110138000	0.314766
	Tb427-110164000	0.0545982
	Tb427-110164100	0.0248912
	Tb427-110164200	0.0400928
	Tb427-110164300	0.120453
	Tb427-110164600	0.151784
	Tb427-110172500	0.118074
	Tb427-110177600	0.0525675
	Tb427-110181400	0.00220482
	Tb427-110181500	0.00452567

## Sheet: BSF and PCF gating
BSF and PCF were multiplexed for fresh (sample_01) and frozen (sample_02) samples. Cells were demultiplexed using high-confidence markers (tab "Life cycle marker genes") and scGATE.
Results are provided below for all cells before filtering.
barcode = cell barcode, orig.ident = original sample, nCount_RNA = number of unique transcripts (UMI) per cell, nFeature_RNA = number unique genes per cell, BSF_Ucell = BSF score bases on marrkers, PCF_Ucell = PCF score bases on markers, BSF_gate = results of BSF gating, PCF_gate = results of PCF gating, form = form based on gating purity (Pure for one form = for, pure for both forms = multiplet,…
bacode	orig.ident	nCount_RNA	nFeature_RNA	BSF_UCell	PCF_UCell	BSF_gate	PCF_gate	form
AAACCCAAGTGTTGTC-1	sample_01	2914	1693	0.134077	0.393115	Impure	Pure	PCF
AAACCCACACCCTCTA-1	sample_01	3559	1934	0.387263	0.161881	Pure	Impure	BSF
AAACCCACATCCGATA-1	sample_01	2696	1492	0.267731	0.196901	Pure	Impure	BSF
AAACCCAGTGGATCGA-1	sample_01	1146	654	0.155173	0.119556	Pure	Impure	BSF
AAACCCAGTGTATACC-1	sample_01	2197	1286	0.364699	0.169577	Pure	Impure	BSF
AAACCCATCAACTCTT-1	sample_01	2233	1447	0.112308	0.337716	Impure	Pure	PCF
AAACCCATCAGACAAA-1	sample_01	956	805	0.236231	0.127242	Pure	Impure	BSF
AAACCCATCGGATTAC-1	sample_01	2754	1503	0.323442	0.219117	Pure	Impure	BSF
AAACCCATCGGCTTGG-1	sample_01	1105	750	0.270853	0.173698	Pure	Impure	BSF
AAACGAAAGGCACCAA-1	sample_01	3284	1779	0.130615	0.38195	Impure	Pure	PCF
AAACGAAGTCAAAGAT-1	sample_01	5165	2580	0.120897	0.41697	Impure	Pure	PCF
AAACGAAGTCAGGCAA-1	sample_01	3783	2072	0.0926346	0.352492	Impure	Pure	PCF
AAACGAAGTTAGGGTG-1	sample_01	3958	2084	0.0715064	0.403181	Impure	Pure	PCF
AAACGAATCCGCCTAT-1	sample_01	2664	1745	0.106744	0.323232	Impure	Pure	PCF
AAACGCTAGAGCAAGA-1	sample_01	3645	1987	0.107038	0.338821	Impure	Pure	PCF
AAACGCTAGCGACAGT-1	sample_01	3919	2133	0.115026	0.346986	Impure	Pure	PCF
AAACGCTGTGGGTCAA-1	sample_01	2357	1199	0.342397	0.200921	Pure	Impure	BSF
AAACGCTGTGTAAACA-1	sample_01	1943	1107	0.280442	0.151137	Pure	Impure	BSF
AAACGCTTCATGTCTT-1	sample_01	3089	1787	0.105654	0.416308	Impure	Pure	PCF
AAAGAACAGTGCCAGA-1	sample_01	3184	1867	0.126103	0.354427	Impure	Pure	PCF
AAAGAACCACACCGCA-1	sample_01	4174	2265	0.0733397	0.395552	Impure	Pure	PCF
AAAGAACCAGCATTGT-1	sample_01	5174	2587	0.0945128	0.364694	Impure	Pure	PCF
AAAGAACGTGTATTCG-1	sample_01	3641	2055	0.148353	0.38074	Impure	Pure	PCF
AAAGAACTCTTGATTC-1	sample_01	3588	2113	0.383955	0.176579	Pure	Impure	BSF
AAAGGATAGATGAAGG-1	sample_01	4207	2320	0.0834808	0.316528	Impure	Pure	PCF
AAAGGATAGCCTATCA-1	sample_01	2719	1485	0.333013	0.25	Pure	Impure	BSF
AAAGGATAGTTGCCTA-1	sample_01	4130	2175	0.0693654	0.325964	Impure	Pure	PCF
AAAGGATCAACAGCCC-1	sample_01	1381	861	0.29666	0.158117	Pure	Impure	BSF
AAAGGATCACTCCTTG-1	sample_01	532	390	0.223692	0.12823	Impure	Impure	impure
AAAGGATCACTGCACG-1	sample_01	3266	1862	0.0845513	0.413512	Impure	Pure	PCF
AAAGGATCAGAGGAAA-1	sample_01	2945	1594	0.0803974	0.374006	Impure	Pure	PCF
AAAGGATCAGGACAGT-1	sample_01	3248	1888	0.0860769	0.383657	Impure	Pure	PCF
AAAGGATTCTACACAG-1	sample_01	1430	989	0.284282	0.119671	Pure	Impure	BSF
AAAGGATTCTACCAGA-1	sample_01	5250	2577	0.122506	0.402778	Impure	Pure	PCF
AAAGGATTCTCATTGT-1	sample_01	1497	898	0.314545	0.148359	Pure	Impure	BSF
AAAGGGCAGAAGTATC-1	sample_01	2843	1727	0.0787692	0.38329	Impure	Pure	PCF
AAAGGGCAGCACTAAA-1	sample_01	3204	1938	0.124994	0.363145	Impure	Pure	PCF
AAAGGGCAGCAGTAAT-1	sample_01	2914	1646	0.155737	0.329198	Impure	Pure	PCF
AAAGGGCAGCATTGAA-1	sample_01	7559	3485	0.0615128	0.48294	Impure	Pure	PCF
AAAGGGCAGGTTACAA-1	sample_01	3183	1883	0.0968013	0.390905	Impure	Pure	PCF
AAAGGGCCAGTGTGCC-1	sample_01	1656	972	0.299744	0.179762	Pure	Impure	BSF
AAAGGGCGTAGTGGCA-1	sample_01	4824	2357	0.0757244	0.343351	Impure	Pure	PCF
AAAGGGCGTCCTTAAG-1	sample_01	2615	1617	0.328814	0.182605	Pure	Impure	BSF
AAAGGTAAGAAAGTCT-1	sample_01	3240	1952	0.104006	0.367113	Impure	Pure	PCF
AAAGGTAAGACAACAT-1	sample_01	4206	2346	0.0871026	0.338766	Impure	Pure	PCF
AAAGGTAAGCAAGTCG-1	sample_01	1902	1129	0.294673	0.142595	Pure	Impure	BSF
AAAGGTAAGCGTCAGA-1	sample_01	1763	1076	0.296673	0.186218	Pure	Impure	BSF
AAAGGTAAGTAATACG-1	sample_01	2333	1312	0.389929	0.20529	Pure	Impure	BSF
AAAGGTACAGTGGGTA-1	sample_01	4832	2516	0.0957051	0.368079	Impure	Pure	PCF
AAAGGTAGTACAGTTC-1	sample_01	4665	2464	0.0762115	0.369458	Impure	Pure	PCF
AAAGGTAGTATGAGAT-1	sample_01	1496	940	0.229865	0.18419	Pure	Impure	BSF
AAAGGTAGTCTAACTG-1	sample_01	3260	1827	0.300615	0.210119	Pure	Impure	BSF
AAAGGTAGTGTAAACA-1	sample_01	3264	1843	0.117564	0.315131	Impure	Pure	PCF
AAAGGTAGTTCGGCGT-1	sample_01	1755	976	0.245981	0.175282	Pure	Impure	BSF
AAAGGTAGTTCTCCAC-1	sample_01	4784	2372	0.0956346	0.425276	Impure	Pure	PCF
AAAGGTAGTTTCGTGA-1	sample_01	4370	2226	0.1465	0.338635	Impure	Pure	PCF
AAAGGTATCAAGTGGG-1	sample_01	529	393	0.183987	0.107353	Impure	Impure	impure
AAAGGTATCACCTGGG-1	sample_01	3445	1960	0.083141	0.378774	Impure	Pure	PCF
AAAGGTATCGGTTGTA-1	sample_01	1380	833	0.158949	0.155766	Pure	Impure	BSF
AAAGGTATCTAGGAAA-1	sample_01	2734	1621	0.12266	0.406615	Impure	Pure	PCF
AAAGTCCAGCAAGCCA-1	sample_01	3476	1830	0.120923	0.422312	Impure	Pure	PCF
AAAGTCCAGTATGCAA-1	sample_01	4675	2272	0.0581923	0.367048	Impure	Pure	PCF
AAAGTCCCACGGTAGA-1	sample_01	5198	2588	0.110455	0.396147	Impure	Pure	PCF
AAAGTCCGTACCTGTA-1	sample_01	2387	1310	0.156519	0.376248	Impure	Pure	PCF
AAAGTCCGTCTGCAAT-1	sample_01	567	438	0.170481	0.085631	Impure	Impure	impure
AAAGTCCGTGCCCGTA-1	sample_01	2307	1439	0.0894744	0.352724	Impure	Pure	PCF
AAAGTCCTCCGTGTCT-1	sample_01	1262	786	0.275763	0.159052	Pure	Impure	BSF
AAAGTCCTCGATTCCC-1	sample_01	4757	2402	0.102487	0.3245	Impure	Pure	PCF
AAAGTCCTCGTGCTCT-1	sample_01	3220	1653	0.0608141	0.383546	Impure	Pure	PCF
AAAGTGAAGCAATAAC-1	sample_01	577	437	0.186167	0.136062	Pure	Impure	BSF
AAAGTGAAGGGAGGTG-1	sample_01	4201	2276	0.163353	0.372867	Impure	Pure	PCF
AAAGTGAAGGGCCTCT-1	sample_01	5633	2557	0.0676859	0.442131	Impure	Pure	PCF
AAAGTGACAGCGTGCT-1	sample_01	4929	2442	0.14109	0.373296	Impure	Pure	PCF
AAAGTGACATGTTCGA-1	sample_01	1832	978	0.308923	0.154153	Pure	Impure	BSF
AAAGTGAGTAGATCGG-1	sample_01	1083	784	0.251795	0.164863	Pure	Impure	BSF
AAAGTGAGTATGTCAC-1	sample_01	3010	1665	0.0745385	0.382508	Impure	Pure	PCF
AAAGTGAGTCGAGCTC-1	sample_01	3831	2021	0.396487	0.159833	Pure	Impure	BSF
AAAGTGAGTTTCGCTC-1	sample_01	3029	1725	0.374064	0.17574	Pure	Impure	BSF
AAAGTGATCCAGTGCG-1	sample_01	1427	856	0.268051	0.197131	Pure	Impure	BSF
AAAGTGATCGCTCATC-1	sample_01	3379	1768	0.127333	0.387655	Impure	Pure	PCF
AAAGTGATCTGAGATC-1	sample_01	3072	1746	0.100981	0.39777	Impure	Pure	PCF
AAATGGAAGCCATTTG-1	sample_01	1355	818	0.254583	0.160361	Pure	Impure	BSF
AAATGGAAGGTCACCC-1	sample_01	2607	1491	0.11675	0.377179	Impure	Pure	PCF
AAATGGAAGTAGACAT-1	sample_01	1911	1085	0.285776	0.210375	Pure	Impure	BSF
AAATGGAAGTGGATTA-1	sample_01	4177	2236	0.0846923	0.347464	Impure	Pure	PCF
AAATGGACAAGCTCTA-1	sample_01	1969	1156	0.279558	0.141754	Pure	Impure	BSF
AAATGGACAAGTAGTA-1	sample_01	3536	1988	0.09775	0.38978	Impure	Pure	PCF
AAATGGACAATCTAGC-1	sample_01	5906	2961	0.0955321	0.399079	Impure	Pure	PCF
AAATGGACATGAAAGT-1	sample_01	5799	2803	0.0979872	0.405631	Impure	Pure	PCF
AAATGGAGTAGTCCTA-1	sample_01	5902	2875	0.233962	0.354347	Impure	Pure	PCF
AAATGGAGTTCAGCTA-1	sample_01	618	471	0.112192	0.0958571	Impure	Impure	impure
AAATGGATCAAAGACA-1	sample_01	3730	2121	0.0889231	0.41877	Impure	Pure	PCF
AAATGGATCTGTCAGA-1	sample_01	2450	1443	0.435237	0.195387	Pure	Impure	BSF
AAATGGATCTTGTGCC-1	sample_01	3896	2213	0.0803077	0.383385	Impure	Pure	PCF
AACAAAGGTGAGAACC-1	sample_01	3941	2149	0.106737	0.387218	Impure	Pure	PCF
AACAAAGGTGGACAGT-1	sample_01	6874	3046	0.148577	0.453962	Impure	Pure	PCF
AACAAAGGTTGCTCGG-1	sample_01	2116	1133	0.389038	0.192583	Pure	Impure	BSF
AACAAAGTCCTGGGTG-1	sample_01	1554	938	0.258962	0.182794	Pure	Impure	BSF
AACAAAGTCGTGGCTG-1	sample_01	2358	1269	0.321122	0.187056	Pure	Impure	BSF
AACAACCAGCCATGCC-1	sample_01	6524	3026	0.184378	0.438484	Impure	Pure	PCF
AACAACCCATCGGATT-1	sample_01	4836	2414	0.140763	0.395817	Impure	Pure	PCF
AACAACCCATGACGGA-1	sample_01	4414	2385	0.110295	0.317625	Impure	Pure	PCF
AACAACCGTGGCTTAT-1	sample_01	1638	909	0.239006	0.210262	Pure	Impure	BSF
AACAACCGTTCCGCTT-1	sample_01	520	393	0.118494	0.106659	Impure	Impure	impure
AACAACCGTTGGGCCT-1	sample_01	1191	732	0.285994	0.146321	Pure	Impure	BSF
AACAACCGTTGTGCAT-1	sample_01	685	508	0.2635	0.0894028	Impure	Impure	impure
AACAACCTCCTTACCG-1	sample_01	2088	1203	0.23425	0.160421	Pure	Impure	BSF
AACAACCTCGCGGTAC-1	sample_01	1763	1141	0.357455	0.210492	Pure	Impure	BSF
AACAACCTCGTGCGAC-1	sample_01	6810	3158	0.128205	0.455938	Impure	Pure	PCF
AACAAGAAGATGCAGC-1	sample_01	3880	2118	0.104577	0.365339	Impure	Pure	PCF
AACAAGAAGCACCGTC-1	sample_01	1094	773	0.253641	0.158343	Pure	Impure	BSF
AACAAGACACTTGTGA-1	sample_01	569	446	0.233769	0.106071	Impure	Impure	impure
AACAAGAGTCGTTATG-1	sample_01	3203	1849	0.12541	0.322109	Impure	Pure	PCF
AACAAGATCAAGGACG-1	sample_01	2004	1143	0.0961859	0.3437	Impure	Pure	PCF
AACAAGATCTTGCGCT-1	sample_01	3630	1868	0.0620064	0.338552	Impure	Pure	PCF
AACACACAGTGTTCCA-1	sample_01	1005	670	0.169013	0.133843	Pure	Impure	BSF
AACACACCACATATGC-1	sample_01	769	595	0.231237	0.131288	Impure	Impure	impure
AACACACCATCACCAA-1	sample_01	1329	823	0.262071	0.176143	Pure	Impure	BSF
AACACACGTATTTCTC-1	sample_01	6246	2735	0.117282	0.432954	Impure	Pure	PCF
AACACACTCAGAGTTC-1	sample_01	6062	2831	0.138115	0.421627	Impure	Pure	PCF
AACACACTCTGTGCGG-1	sample_01	1880	1007	0.275109	0.175131	Pure	Impure	BSF
AACAGGGAGAGTCAGC-1	sample_01	2375	1287	0.323141	0.172815	Pure	Impure	BSF
AACAGGGCAATACCCA-1	sample_01	2742	1490	0.288538	0.155603	Pure	Impure	BSF
AACAGGGCACGTCGTG-1	sample_01	2555	1445	0.367737	0.194853	Pure	Impure	BSF
AACAGGGGTACAACGG-1	sample_01	1296	835	0.307436	0.192913	Pure	Impure	BSF
AACAGGGGTATATGGA-1	sample_01	608	439	0.166641	0.106107	Impure	Impure	impure
AACAGGGGTTAAAGTG-1	sample_01	2597	1371	0.283987	0.160079	Pure	Impure	BSF
AACAGGGTCGCTGTTC-1	sample_01	4875	2636	0.111532	0.394639	Impure	Pure	PCF
AACCAACAGACTCATC-1	sample_01	2582	1394	0.346474	0.168125	Pure	Impure	BSF
AACCAACAGTCAGAGC-1	sample_01	1820	1037	0.270622	0.122946	Pure	Impure	BSF
AACCAACCAATTGAGA-1	sample_01	3650	2209	0.0858718	0.350829	Impure	Pure	PCF
AACCAACGTAGCTTAC-1	sample_01	4585	2286	0.07375	0.358536	Impure	Pure	PCF
AACCAACGTATGAAAC-1	sample_01	2563	1488	0.324801	0.183147	Pure	Impure	BSF
AACCAACGTCCGGATC-1	sample_01	1493	1059	0.118827	0.322026	Impure	Pure	PCF
AACCAACTCACGATCA-1	sample_01	2814	1586	0.128942	0.385103	Impure	Pure	PCF
AACCAACTCACTCACC-1	sample_01	586	417	0.168705	0.0959841	Impure	Impure	impure
AACCAACTCCCGTGTT-1	sample_01	4241	2156	0.358654	0.159079	Pure	Impure	BSF
AACCACAAGCTGTACT-1	sample_01	1876	1197	0.17909	0.326343	Impure	Pure	PCF
AACCACACAAGTACCT-1	sample_01	5367	2587	0.110359	0.385179	Impure	Pure	PCF
AACCACACACCCTAAA-1	sample_01	1424	968	0.204897	0.160163	Pure	Impure	BSF
AACCACAGTGAGTAGC-1	sample_01	3588	1868	0.135955	0.404397	Impure	Pure	PCF
AACCACAGTGTAGCAG-1	sample_01	1139	765	0.256782	0.133819	Pure	Impure	BSF
AACCACATCATTCCTA-1	sample_01	5398	2681	0.119103	0.412375	Impure	Pure	PCF
AACCACATCTTACGTT-1	sample_01	5139	2451	0.0445897	0.412218	Impure	Pure	PCF
AACCATGAGCTTAAGA-1	sample_01	3677	1894	0.165782	0.404357	Impure	Pure	PCF
AACCATGAGGAACATT-1	sample_01	3814	2127	0.0722308	0.34376	Impure	Pure	PCF
AACCATGCAACCACGC-1	sample_01	2663	1482	0.354801	0.184474	Pure	Impure	BSF
AACCATGCACAACCGC-1	sample_01	2161	1254	0.280179	0.180496	Pure	Impure	BSF
AACCATGCACTGTCCT-1	sample_01	2277	1318	0.378429	0.16947	Pure	Impure	BSF
AACCATGCAGAGGCAT-1	sample_01	2460	1327	0.271295	0.182048	Pure	Impure	BSF
AACCATGCAGCAAGAC-1	sample_01	1892	1089	0.260968	0.173216	Pure	Impure	BSF
AACCATGCAGGAATCG-1	sample_01	518	376	0.123763	0.118718	Impure	Impure	impure
AACCATGCATCTGTTT-1	sample_01	4777	2344	0.12434	0.361476	Impure	Pure	PCF
AACCATGCATGAAGCG-1	sample_01	1474	879	0.248449	0.16622	Pure	Impure	BSF
AACCATGGTACTCCCT-1	sample_01	4756	2234	0.0768718	0.384984	Impure	Pure	PCF
AACCATGGTTAGAGAT-1	sample_01	4197	2250	0.130872	0.404167	Impure	Pure	PCF
AACCATGGTTGGGACA-1	sample_01	3969	2085	0.0863782	0.346524	Impure	Pure	PCF
AACCATGTCGCGAAGA-1	sample_01	3000	1598	0.137615	0.367784	Impure	Pure	PCF
AACCCAAAGCCTCCAG-1	sample_01	1795	1186	0.234801	0.17669	Pure	Impure	BSF
AACCCAAAGGTCATTC-1	sample_01	4904	2475	0.103038	0.401383	Impure	Pure	PCF
AACCCAACAACGAGGT-1	sample_01	4521	2351	0.122423	0.373835	Impure	Pure	PCF
AACCCAACAAGCTGCC-1	sample_01	2481	1314	0.332949	0.193177	Pure	Impure	BSF
AACCCAACACAGTATC-1	sample_01	4992	2581	0.101737	0.407097	Impure	Pure	PCF
AACCCAACAGAGGTAC-1	sample_01	3433	1995	0.0718974	0.398177	Impure	Pure	PCF
AACCCAAGTAATTAGG-1	sample_01	1776	1066	0.283314	0.168762	Pure	Impure	BSF
AACCCAAGTACTCAAC-1	sample_01	3048	1663	0.132962	0.390907	Impure	Pure	PCF
AACCCAAGTACTGGGA-1	sample_01	1493	943	0.325372	0.162714	Pure	Impure	BSF
AACCCAAGTATCAGGG-1	sample_01	4013	2138	0.114891	0.42879	Impure	Pure	PCF
AACCCAAGTCGTGTTA-1	sample_01	1962	1300	0.262333	0.188742	Pure	Impure	BSF
AACCCAAGTGTAGCAG-1	sample_01	4703	2475	0.0733974	0.394927	Impure	Pure	PCF
AACCCAATCCCATTCG-1	sample_01	4666	2362	0.200795	0.425625	Impure	Pure	PCF
AACCTGAAGCCTAACT-1	sample_01	4218	2156	0.118481	0.392728	Impure	Pure	PCF
AACCTGAAGCTAGAAT-1	sample_01	4517	2370	0.0761282	0.330052	Impure	Pure	PCF
AACCTGACAAGTTCCA-1	sample_01	1875	1078	0.284962	0.168071	Pure	Impure	BSF
AACCTGACATCCGGCA-1	sample_01	1473	902	0.261885	0.168167	Pure	Impure	BSF
AACCTGAGTAGCGATG-1	sample_01	2228	1358	0.188391	0.158119	Pure	Impure	BSF
AACCTGAGTGCGTTTA-1	sample_01	2030	1173	0.344295	0.150403	Pure	Impure	BSF
AACCTGATCTGCTGAA-1	sample_01	4795	2404	0.104673	0.396837	Impure	Pure	PCF
AACCTTTAGCGAATGC-1	sample_01	4720	2496	0.234705	0.338758	Impure	Pure	PCF
AACCTTTCAATGAGCG-1	sample_01	3680	1995	0.111013	0.357873	Impure	Pure	PCF
AACCTTTCACAAGCCC-1	sample_01	5274	2515	0.0690192	0.42124	Impure	Pure	PCF
AACCTTTCAGACGGAT-1	sample_01	795	505	0.186641	0.120591	Pure	Impure	BSF
AACCTTTCAGCTTTGA-1	sample_01	2490	1340	0.3185	0.161079	Pure	Impure	BSF
AACCTTTGTGTTCGTA-1	sample_01	2803	1486	0.0775641	0.343333	Impure	Pure	PCF
AACCTTTGTTCCGGTG-1	sample_01	4738	2420	0.0422436	0.360268	Impure	Pure	PCF
AACCTTTGTTGAATCC-1	sample_01	5158	2463	0.0989359	0.372972	Impure	Pure	PCF
AACCTTTTCGCTCCTA-1	sample_01	5626	2671	0.084	0.426433	Impure	Pure	PCF
AACGAAAAGACCACGA-1	sample_01	2988	1626	0.344865	0.160048	Pure	Pure	multiplet
AACGAAAAGGATACAT-1	sample_01	1937	1245	0.357897	0.163298	Pure	Impure	BSF
AACGAAAAGTCACTGT-1	sample_01	2014	1082	0.311968	0.143579	Pure	Impure	BSF
AACGAAACAAATGCTC-1	sample_01	3828	2219	0.131288	0.423165	Impure	Pure	PCF
AACGAAACAACCTATG-1	sample_01	2868	1653	0.410532	0.197048	Pure	Impure	BSF
AACGAAAGTCCAGTTA-1	sample_01	5556	2662	0.0882885	0.431871	Impure	Pure	PCF
AACGGGAAGATAGGGA-1	sample_01	5334	2644	0.0932821	0.452938	Impure	Pure	PCF
AACGGGACAACTACGT-1	sample_01	624	476	0.115122	0.129946	Impure	Impure	impure
AACGGGACAAGGCCTC-1	sample_01	5382	2681	0.112673	0.383534	Impure	Pure	PCF
AACGGGATCCGTGCGA-1	sample_01	1967	931	0.284788	0.157839	Pure	Impure	BSF
AACGGGATCCTAAGTG-1	sample_01	4110	2129	0.0823333	0.36431	Impure	Pure	PCF
AACGGGATCGGAAGGT-1	sample_01	2172	1425	0.124051	0.357831	Impure	Pure	PCF
AACGTCAAGTGCAAAT-1	sample_01	947	739	0.258494	0.133131	Pure	Impure	BSF
AACGTCACACATATGC-1	sample_01	2703	1412	0.113167	0.37498	Impure	Pure	PCF
AACGTCAGTACTTCCC-1	sample_01	2531	1365	0.192846	0.386631	Impure	Pure	PCF
AACGTCAGTTGGATCT-1	sample_01	4601	2442	0.0766474	0.429012	Impure	Pure	PCF
AACGTCATCAGCTTGA-1	sample_01	5242	2563	0.0884359	0.389321	Impure	Pure	PCF
AACGTCATCTCGGCTT-1	sample_01	2842	1506	0.282468	0.155194	Pure	Impure	BSF
AACTTCTCACGAGAAC-1	sample_01	4175	2227	0.074641	0.429794	Impure	Pure	PCF
AACTTCTGTGTAGCAG-1	sample_01	2405	1284	0.108237	0.322425	Impure	Pure	PCF
AACTTCTGTTCCAGGC-1	sample_01	2049	1179	0.0981795	0.374605	Impure	Pure	PCF
AACTTCTTCACGGAGA-1	sample_01	3583	1836	0.0839103	0.405079	Impure	Pure	PCF
AACTTCTTCCTCTTTC-1	sample_01	650	467	0.1125	0.100006	Impure	Impure	impure
AACTTCTTCTGAATGC-1	sample_01	940	591	0.270378	0.143315	Pure	Impure	BSF
AAGAACAAGCTAGATA-1	sample_01	2773	1639	0.122391	0.360062	Impure	Pure	PCF
AAGAACAAGCTGGCTC-1	sample_01	2007	1127	0.357686	0.172196	Pure	Impure	BSF
AAGAACAAGTCCTACA-1	sample_01	2144	1170	0.285635	0.156613	Pure	Impure	BSF
AAGAACACAACCCTAA-1	sample_01	2106	1422	0.319949	0.197466	Pure	Impure	BSF
AAGAACACATCATCCC-1	sample_01	2049	1288	0.255558	0.170185	Pure	Impure	BSF
AAGAACACATGAAAGT-1	sample_01	1891	1237	0.321705	0.215567	Pure	Impure	BSF
AAGAACACATGGGTCC-1	sample_01	564	464	0.131538	0.0920159	Impure	Impure	impure
AAGAACATCCAAGCAT-1	sample_01	4127	2173	0.108936	0.396653	Impure	Pure	PCF
AAGACAACACGCAGTC-1	sample_01	4224	2197	0.105583	0.364798	Impure	Pure	PCF
AAGACAAGTCTCGGAC-1	sample_01	3162	1847	0.144904	0.344808	Impure	Pure	PCF
AAGACAATCCACAGCG-1	sample_01	1707	1052	0.275647	0.177387	Pure	Impure	BSF
AAGACAATCTTCGACC-1	sample_01	2389	1374	0.192019	0.376274	Impure	Pure	PCF
AAGACTCAGAAACACT-1	sample_01	2208	1296	0.385577	0.143069	Pure	Impure	BSF
AAGACTCAGACGTCGA-1	sample_01	1530	956	0.27441	0.144565	Pure	Impure	BSF
AAGACTCAGAGTGGCT-1	sample_01	3440	1776	0.349603	0.184778	Pure	Impure	BSF
AAGACTCAGCATGATA-1	sample_01	3962	1893	0.409224	0.173609	Pure	Impure	BSF
AAGACTCAGTCTCGTA-1	sample_01	4586	2413	0.0752564	0.35822	Impure	Pure	PCF
AAGACTCCACCTGCTT-1	sample_01	597	447	0.261423	0.102024	Impure	Impure	impure
AAGACTCCATTCTGTT-1	sample_01	648	528	0.197808	0.085494	Impure	Impure	impure
AAGACTCGTCGATTAC-1	sample_01	5550	2522	0.11075	0.422302	Impure	Pure	PCF
AAGACTCGTGGACCTC-1	sample_01	4207	2229	0.0738718	0.364093	Impure	Pure	PCF
AAGACTCGTGTTAACC-1	sample_01	3725	2016	0.0900897	0.32054	Impure	Pure	PCF
AAGACTCTCAAGCCTA-1	sample_01	2634	1371	0.276417	0.174946	Pure	Impure	BSF
AAGACTCTCCAAGGGA-1	sample_01	5247	2615	0.0622821	0.420829	Impure	Pure	PCF
AAGACTCTCGGTAGGA-1	sample_01	2406	1509	0.362058	0.182889	Pure	Impure	BSF
AAGACTCTCTCCGATC-1	sample_01	4274	1984	0.295494	0.189659	Pure	Impure	BSF
AAGATAGAGATGACCG-1	sample_01	3096	1834	0.104276	0.374397	Impure	Pure	PCF
AAGATAGAGCGCCCAT-1	sample_01	2718	1726	0.133147	0.374494	Impure	Pure	PCF
AAGATAGCAAACTCTG-1	sample_01	548	421	0.119487	0.130935	Impure	Impure	impure
AAGATAGCACGCGTGT-1	sample_01	3321	1668	0.12791	0.372728	Impure	Pure	PCF
AAGATAGCACTGGCCA-1	sample_01	5463	2615	0.10359	0.434948	Impure	Pure	PCF
AAGATAGGTCATGGCC-1	sample_01	5510	2662	0.0601538	0.399244	Impure	Pure	PCF
AAGCATCAGGAGACCT-1	sample_01	667	520	0.163724	0.151897	Impure	Impure	impure
AAGCATCAGTGGCCTC-1	sample_01	3086	1638	0.326083	0.171895	Pure	Impure	BSF
AAGCATCCAAGAGTGC-1	sample_01	7514	3532	0.177449	0.48431	Impure	Pure	PCF
AAGCATCCATTGCCGG-1	sample_01	5070	2604	0.108705	0.375603	Impure	Pure	PCF
AAGCATCGTGTAAACA-1	sample_01	1742	1088	0.299192	0.134504	Pure	Impure	BSF
AAGCATCGTTGGAGGT-1	sample_01	3418	1747	0.0701026	0.395992	Impure	Pure	PCF
AAGCATCTCGTAACTG-1	sample_01	3610	1956	0.0973269	0.394357	Impure	Pure	PCF
AAGCATCTCGTAATGC-1	sample_01	5251	2464	0.0893526	0.350661	Impure	Pure	PCF
AAGCCATAGTACGTCT-1	sample_01	1206	908	0.281276	0.158861	Pure	Impure	BSF
AAGCCATAGTGCCTCG-1	sample_01	1294	848	0.36616	0.15855	Pure	Impure	BSF
AAGCCATGTGCCGAAA-1	sample_01	1449	895	0.269571	0.177746	Pure	Impure	BSF
AAGCCATTCAACCCGG-1	sample_01	2243	1314	0.263032	0.156468	Pure	Impure	BSF
AAGCCATTCCTACACC-1	sample_01	672	499	0.151513	0.113762	Impure	Impure	impure
AAGCGAGAGATACGAT-1	sample_01	3461	1803	0.122423	0.3787	Impure	Pure	PCF
AAGCGAGAGTGGATTA-1	sample_01	1151	827	0.348436	0.173337	Pure	Impure	BSF
AAGCGAGCAAAGCGTG-1	sample_01	2791	1502	0.299372	0.15653	Pure	Impure	BSF
AAGCGAGCAGAGAATT-1	sample_01	4132	2249	0.0990577	0.345865	Impure	Pure	PCF
AAGCGAGCAGAGTGAC-1	sample_01	3397	1706	0.133	0.436946	Impure	Pure	PCF
AAGCGAGCATAATCGC-1	sample_01	3331	1855	0.128833	0.381008	Impure	Pure	PCF
AAGCGAGGTCCCAAAT-1	sample_01	2740	1570	0.110038	0.375373	Impure	Pure	PCF
AAGCGAGGTTGCCGAC-1	sample_01	608	411	0.117481	0.165942	Impure	Impure	impure
AAGCGAGTCCGTAATG-1	sample_01	1085	671	0.188731	0.193083	Pure	Impure	BSF
AAGCGAGTCCTGGTCT-1	sample_01	2834	1600	0.258199	0.146302	Pure	Impure	BSF
AAGCGAGTCTCTATGT-1	sample_01	3007	1614	0.0673718	0.403179	Impure	Pure	PCF
AAGCGTTAGACGCTCC-1	sample_01	2651	1523	0.103077	0.406222	Impure	Pure	PCF
AAGCGTTCAATTGTGC-1	sample_01	1987	1070	0.375968	0.209125	Pure	Impure	BSF
AAGCGTTCACCGTGGT-1	sample_01	516	395	0.148436	0.0920357	Impure	Impure	impure
AAGCGTTCACTCCGAG-1	sample_01	2799	1693	0.0684231	0.32895	Impure	Pure	PCF
AAGCGTTCAGAAATCA-1	sample_01	4491	2449	0.252397	0.296145	Pure	Pure	multiplet
AAGCGTTCATGTTCGA-1	sample_01	3192	1776	0.0926731	0.327028	Impure	Pure	PCF
AAGCGTTGTAAGGCTG-1	sample_01	4157	2323	0.134487	0.343665	Impure	Pure	PCF
AAGCGTTGTTCCATTT-1	sample_01	5359	2653	0.112833	0.408173	Impure	Pure	PCF
AAGCGTTTCACGGGAA-1	sample_01	1679	939	0.317071	0.178677	Pure	Impure	BSF
AAGCGTTTCTGGTGCG-1	sample_01	2696	1459	0.159487	0.388698	Impure	Pure	PCF
AAGCGTTTCTTAGCTT-1	sample_01	3140	1572	0.111564	0.364692	Impure	Pure	PCF
AAGGAATCAAGATCCT-1	sample_01	1692	948	0.278558	0.154845	Pure	Impure	BSF
AAGGAATCAAGGCAAC-1	sample_01	3602	1820	0.389654	0.196851	Pure	Impure	BSF
AAGGAATCAATACGAA-1	sample_01	502	391	0.188872	0.0869762	Impure	Impure	impure
AAGGAATCAATAGTCC-1	sample_01	3325	1864	0.109667	0.398214	Impure	Pure	PCF
AAGGAATCAGAGGTAC-1	sample_01	2205	1293	0.0912051	0.366996	Impure	Pure	PCF
AAGGAATCAGGAAGTC-1	sample_01	4990	2449	0.109936	0.433546	Impure	Pure	PCF
AAGGAATTCATGAAAG-1	sample_01	721	558	0.187314	0.123778	Pure	Impure	BSF
AAGGTAAAGAATTGCA-1	sample_01	4393	2257	0.120949	0.374454	Impure	Pure	PCF
AAGGTAAAGAGTGGCT-1	sample_01	4858	2390	0.0828141	0.381218	Impure	Pure	PCF
AAGGTAACAACTTGCA-1	sample_01	5100	2441	0.110782	0.405026	Impure	Pure	PCF
AAGGTAACAGGGAGAG-1	sample_01	1729	1042	0.329724	0.190192	Pure	Impure	BSF
AAGGTAACATAAGATG-1	sample_01	2465	1462	0.0863526	0.382149	Impure	Pure	PCF
AAGGTAAGTAGAAACT-1	sample_01	2241	1292	0.416474	0.16345	Pure	Impure	BSF
AAGGTAATCCGCACTT-1	sample_01	1689	1026	0.246538	0.168315	Pure	Impure	BSF
AAGGTAATCGAATGCT-1	sample_01	4338	2192	0.104526	0.387911	Impure	Pure	PCF
AAGTACCAGACTTCCA-1	sample_01	4450	2138	0.0634551	0.417456	Impure	Pure	PCF
AAGTACCAGCGTTCCG-1	sample_01	3356	1905	0.09675	0.339871	Impure	Pure	PCF
AAGTACCAGTAGGAAG-1	sample_01	2043	1322	0.176474	0.316786	Impure	Pure	PCF
AAGTACCCAGCCGGTT-1	sample_01	985	749	0.210038	0.146556	Pure	Impure	BSF
AAGTACCGTAGTGATA-1	sample_01	4592	2363	0.0624231	0.390456	Impure	Pure	PCF
AAGTACCGTCATCCGG-1	sample_01	2537	1533	0.356712	0.19128	Pure	Impure	BSF
AAGTCGTAGGACTTCT-1	sample_01	2867	1491	0.318199	0.15427	Pure	Impure	BSF
AAGTCGTAGGCCCACT-1	sample_01	3274	1951	0.125064	0.309119	Impure	Pure	PCF
AAGTCGTGTTTACGAC-1	sample_01	2186	1279	0.0986859	0.37198	Impure	Pure	PCF
AAGTCGTTCATTTGCT-1	sample_01	3406	1758	0.339051	0.158976	Pure	Impure	BSF
AAGTCGTTCCACTGAA-1	sample_01	1556	993	0.261776	0.149605	Pure	Impure	BSF
AAGTCGTTCTTAATCC-1	sample_01	2205	1289	0.271635	0.199216	Pure	Impure	BSF
AAGTCGTTCTTAGCAG-1	sample_01	1764	1065	0.32616	0.139125	Pure	Impure	BSF
AAGTGAACAAACCGGA-1	sample_01	1628	1022	0.341673	0.197982	Pure	Impure	BSF
AAGTGAACACGTCGGT-1	sample_01	1516	940	0.232712	0.183343	Pure	Impure	BSF
AAGTGAACATCGCTCT-1	sample_01	4356	2261	0.130859	0.346395	Impure	Pure	PCF
AAGTGAAGTGGAGAAA-1	sample_01	2526	1487	0.349077	0.185776	Pure	Impure	BSF
AAGTGAATCCCATTTA-1	sample_01	4358	2258	0.0465513	0.395938	Impure	Pure	PCF
AAGTTCGAGTAGGAAG-1	sample_01	2367	1346	0.286115	0.172536	Pure	Impure	BSF
AAGTTCGAGTGTGTTC-1	sample_01	549	419	0.254263	0.0816171	Impure	Impure	impure
AAGTTCGCAGCTATAC-1	sample_01	3777	2015	0.0789487	0.403478	Impure	Pure	PCF
AAGTTCGCATCGCCTT-1	sample_01	2982	1587	0.361763	0.212111	Pure	Impure	BSF
AAGTTCGGTACCCGCA-1	sample_01	3515	1670	0.345737	0.208986	Pure	Impure	BSF
AAGTTCGGTAGACAGC-1	sample_01	3097	1660	0.341462	0.174756	Pure	Impure	BSF
AAGTTCGGTATATGGA-1	sample_01	3934	2162	0.0895833	0.313667	Impure	Pure	PCF
AAGTTCGGTCTGTGCG-1	sample_01	7140	3887	0.348545	0.211058	Pure	Pure	multiplet
AAGTTCGTCATGCCGG-1	sample_01	1868	1148	0.280282	0.18349	Pure	Impure	BSF
AAGTTCGTCGTTATCT-1	sample_01	2216	1354	0.104103	0.350506	Impure	Pure	PCF
AAGTTCGTCTCTTAAC-1	sample_01	2154	1221	0.124455	0.359129	Impure	Pure	PCF
AAGTTCGTCTGGGCGT-1	sample_01	2944	1588	0.317019	0.162304	Pure	Impure	BSF
AATAGAGAGGATATAC-1	sample_01	3134	1607	0.355071	0.192744	Pure	Impure	BSF
AATAGAGAGGCACTAG-1	sample_01	2162	1389	0.340788	0.157585	Pure	Impure	BSF
AATAGAGAGGTGAGCT-1	sample_01	4950	2487	0.0988269	0.401452	Impure	Pure	PCF
AATAGAGAGTGGAAAG-1	sample_01	6175	2818	0.0922821	0.376212	Impure	Pure	PCF
AATAGAGCAAACACCT-1	sample_01	2549	1324	0.337109	0.171383	Pure	Impure	BSF
AATAGAGCAAGAGCTG-1	sample_01	4841	2510	0.0801923	0.434121	Impure	Pure	PCF
AATAGAGCAAGCCCAC-1	sample_01	683	457	0.185968	0.132655	Impure	Impure	impure
AATAGAGTCTAGGCCG-1	sample_01	3886	2076	0.135199	0.400702	Impure	Pure	PCF
AATCACGAGGCGTTGA-1	sample_01	1595	1010	0.261667	0.21044	Pure	Impure	BSF
AATCACGAGGGAACAA-1	sample_01	1894	1084	0.367186	0.166962	Pure	Impure	BSF
AATCACGCAGGACATG-1	sample_01	2578	1541	0.304141	0.16303	Pure	Impure	BSF
AATCACGCAGGAGGTT-1	sample_01	1820	947	0.233756	0.152786	Pure	Impure	BSF
AATCACGCATGTTTGG-1	sample_01	4917	2423	0.110429	0.419825	Impure	Pure	PCF
AATCACGGTGCGAACA-1	sample_01	2325	1420	0.125667	0.342972	Impure	Pure	PCF
AATCACGGTGGATGAC-1	sample_01	3973	2054	0.0665769	0.393617	Impure	Pure	PCF
AATCACGTCAAACGTC-1	sample_01	1819	1042	0.326231	0.177286	Pure	Impure	BSF
AATCACGTCGAGCACC-1	sample_01	2663	1405	0.331391	0.171508	Pure	Impure	BSF
AATCACGTCGTGTTCC-1	sample_01	937	773	0.0854295	0.278262	Impure	Pure	PCF
AATCACGTCTCAAAGC-1	sample_01	1290	874	0.295615	0.148361	Pure	Impure	BSF
AATCACGTCTGGACCG-1	sample_01	4517	2240	0.103795	0.466984	Impure	Pure	PCF
AATCGACAGACGAAGA-1	sample_01	2767	1659	0.0985577	0.366381	Impure	Pure	PCF
AATCGACAGACTCATC-1	sample_01	2733	1564	0.314263	0.171964	Pure	Impure	BSF
AATCGACCAACCTAAC-1	sample_01	2825	1516	0.353628	0.183165	Pure	Impure	BSF
AATCGACCACAGTGAG-1	sample_01	529	411	0.215878	0.106302	Impure	Impure	impure
AATCGACCACTAGTAC-1	sample_01	3946	2078	0.0744615	0.361012	Impure	Pure	PCF
AATCGACGTCCCGTGA-1	sample_01	6075	2776	0.122917	0.433111	Impure	Pure	PCF
AATCGACGTTATGGTC-1	sample_01	2834	1359	0.370353	0.165764	Pure	Impure	BSF
AATCGACGTTGCAACT-1	sample_01	5340	2572	0.235038	0.370671	Impure	Pure	PCF
AATCGACTCACGAGGA-1	sample_01	2725	1442	0.375506	0.169317	Pure	Impure	BSF
AATCGACTCTGTACAG-1	sample_01	8890	3714	0.152718	0.491873	Impure	Pure	PCF
AATCGTGAGAAGTCCG-1	sample_01	4307	2183	0.0589551	0.393413	Impure	Pure	PCF
AATCGTGAGACCACGA-1	sample_01	2726	1503	0.33525	0.178308	Pure	Impure	BSF
AATCGTGAGATAGCTA-1	sample_01	5859	2992	0.103744	0.458181	Impure	Pure	PCF
AATCGTGAGGGTATAT-1	sample_01	4262	2179	0.0945833	0.415518	Impure	Pure	PCF
AATCGTGAGGTGCATG-1	sample_01	6807	2936	0.103686	0.447534	Impure	Pure	PCF
AATCGTGCAGGTTTAC-1	sample_01	3194	1660	0.0692115	0.368565	Impure	Pure	PCF
AATCGTGGTACTGAGG-1	sample_01	4215	2143	0.0883269	0.348988	Impure	Pure	PCF
AATCGTGGTCACGACC-1	sample_01	1498	879	0.284071	0.148833	Pure	Impure	BSF
AATCGTGGTGGAGAAA-1	sample_01	2132	1413	0.114904	0.404056	Impure	Pure	PCF
AATCGTGTCTGATTCT-1	sample_01	2216	1303	0.302045	0.166853	Pure	Impure	BSF
AATGAAGCAAATGCGG-1	sample_01	807	576	0.234865	0.122944	Pure	Impure	BSF
AATGAAGCACACAGAG-1	sample_01	4654	2377	0.0955	0.353784	Impure	Pure	PCF
AATGAAGCACTCCTGT-1	sample_01	2645	1531	0.396173	0.179817	Pure	Impure	BSF
AATGAAGTCATCGACA-1	sample_01	1854	1107	0.394814	0.170349	Pure	Impure	BSF
AATGAAGTCGCCGAAC-1	sample_01	1082	763	0.240994	0.158661	Pure	Impure	BSF
AATGAAGTCGGTCGAC-1	sample_01	4979	2473	0.0293654	0.391942	Impure	Pure	PCF
AATGACCAGCATTTCG-1	sample_01	5616	2762	0.250494	0.339567	Pure	Pure	multiplet
AATGACCCACACGGAA-1	sample_01	1541	1006	0.353878	0.164768	Pure	Impure	BSF
AATGACCTCAACGCTA-1	sample_01	609	440	0.153308	0.106091	Impure	Impure	impure
AATGACCTCCGAAATC-1	sample_01	2465	1472	0.362474	0.17105	Pure	Impure	BSF
AATGACCTCTTAATCC-1	sample_01	3270	1870	0.111974	0.324065	Impure	Pure	PCF
AATGCCAAGACTTCGT-1	sample_01	1638	1098	0.266199	0.156534	Pure	Impure	BSF
AATGCCAAGCCTCTCT-1	sample_01	6243	2943	0.0958526	0.433927	Impure	Pure	PCF
AATGCCAAGCTCGCAC-1	sample_01	4537	2282	0.0423846	0.401847	Impure	Pure	PCF
AATGCCAAGTACTCGT-1	sample_01	1469	879	0.212045	0.176137	Pure	Impure	BSF
AATGCCAAGTCCGCGT-1	sample_01	4394	2289	0.0872756	0.331738	Impure	Pure	PCF
AATGCCACAACCCTAA-1	sample_01	2970	1768	0.102897	0.389536	Impure	Pure	PCF
AATGCCACAATCTCTT-1	sample_01	3130	1700	0.323917	0.160698	Pure	Impure	BSF
AATGCCACAGTCGTTA-1	sample_01	3502	2023	0.101378	0.368147	Impure	Pure	PCF
AATGCCACATTCTCCG-1	sample_01	3470	1731	0.103744	0.402958	Impure	Pure	PCF
AATGCCAGTAGGGTAC-1	sample_01	4162	2211	0.0866987	0.360065	Impure	Pure	PCF
AATGCCAGTATCATGC-1	sample_01	4256	2183	0.0776795	0.365573	Impure	Pure	PCF
AATGCCAGTCACTACA-1	sample_01	4664	2352	0.118628	0.425141	Impure	Pure	PCF
AATGCCATCATCACAG-1	sample_01	2627	1453	0.103712	0.35622	Impure	Pure	PCF
AATGGAAAGCCTTGAT-1	sample_01	5597	2592	0.135968	0.408762	Impure	Pure	PCF
AATGGAAAGCTAATCC-1	sample_01	2147	1279	0.250308	0.183817	Pure	Impure	BSF
AATGGAAAGGACTGGT-1	sample_01	1236	833	0.155244	0.20026	Pure	Impure	BSF
AATGGAACACAAAGTA-1	sample_01	520	351	0.0886731	0.140107	Impure	Impure	impure
AATGGAACACTACCCT-1	sample_01	4275	2165	0.0588846	0.370494	Impure	Pure	PCF
AATGGAAGTATCGTAC-1	sample_01	4140	2162	0.135372	0.338405	Impure	Pure	PCF
AATGGAATCGTAGCCG-1	sample_01	2613	1567	0.320141	0.167373	Pure	Impure	BSF
AATGGAATCGTTCTGC-1	sample_01	5053	2563	0.0927372	0.432581	Impure	Pure	PCF
AATGGAATCTTACCAT-1	sample_01	2106	1209	0.285635	0.181246	Pure	Impure	BSF
AATGGCTAGATGCCGA-1	sample_01	1035	677	0.278968	0.17073	Pure	Impure	BSF
AATGGCTAGTCACAGG-1	sample_01	1521	965	0.318821	0.140849	Pure	Impure	BSF
AATGGCTCAAATTGCC-1	sample_01	1805	960	0.293526	0.142988	Pure	Impure	BSF
AATGGCTCAATGCAAA-1	sample_01	4411	2440	0.0922564	0.337478	Impure	Pure	PCF
AATGGCTCAGGACGAT-1	sample_01	4376	2172	0.070641	0.396538	Impure	Pure	PCF
AATGGCTGTAGCTGAG-1	sample_01	553	406	0.133814	0.0909444	Impure	Impure	impure
AATGGCTGTAGGCAAC-1	sample_01	2931	1410	0.327635	0.169313	Pure	Impure	BSF
AATGGCTTCCAACTAG-1	sample_01	3792	2091	0.0649295	0.359857	Impure	Pure	PCF
AATGGCTTCCCTCTCC-1	sample_01	3541	1779	0.102167	0.388889	Impure	Pure	PCF
AATGGCTTCGCGTGCA-1	sample_01	1734	1039	0.249276	0.206688	Pure	Impure	BSF
AATTCCTAGCAATTCC-1	sample_01	4758	2421	0.0982692	0.399284	Impure	Pure	PCF
AATTCCTGTCTCTCCA-1	sample_01	4227	2201	0.0681731	0.366956	Impure	Pure	PCF
AATTCCTTCACGACTA-1	sample_01	3193	1771	0.0968333	0.349728	Impure	Pure	PCF
AATTCCTTCTTACCGC-1	sample_01	4298	2214	0.0944808	0.40251	Impure	Pure	PCF
AATTCCTTCTTCCGTG-1	sample_01	4735	2376	0.0723782	0.403157	Impure	Pure	PCF
AATTTCCAGCGTGCTC-1	sample_01	5220	2649	0.102205	0.421581	Impure	Pure	PCF
AATTTCCCAACTGGTT-1	sample_01	4035	2087	0.148679	0.432099	Impure	Pure	PCF
AATTTCCCATCACAGT-1	sample_01	819	565	0.25125	0.0895417	Pure	Impure	BSF
AATTTCCGTCATATGC-1	sample_01	5092	2466	0.0767436	0.372018	Impure	Pure	PCF
AATTTCCTCATTGGTG-1	sample_01	3796	2015	0.115103	0.388097	Impure	Pure	PCF
AATTTCCTCCATGATG-1	sample_01	2236	1231	0.0812885	0.32695	Impure	Pure	PCF
AATTTCCTCCTCTGCA-1	sample_01	5771	2588	0.0826282	0.470522	Impure	Pure	PCF
AATTTCCTCCTTTAGT-1	sample_01	2965	1441	0.37716	0.212359	Pure	Impure	BSF
AATTTCCTCGCAGATT-1	sample_01	1643	869	0.213962	0.155048	Pure	Impure	BSF
ACAAAGAAGCCTCATA-1	sample_01	5078	2580	0.0606603	0.426006	Impure	Pure	PCF
ACAAAGAAGTGTACCT-1	sample_01	2665	1477	0.34975	0.16929	Pure	Impure	BSF
ACAAAGAAGTTGCCTA-1	sample_01	4721	2454	0.0902628	0.432544	Impure	Pure	PCF
ACAAAGACAATGGCAG-1	sample_01	2969	1745	0.107577	0.341669	Impure	Pure	PCF
ACAAAGACAATTCTTC-1	sample_01	2751	1667	0.0832115	0.356942	Impure	Pure	PCF
ACAAAGAGTTCGGCGT-1	sample_01	2910	1561	0.110481	0.364988	Impure	Pure	PCF
ACAAAGATCCCTTCCC-1	sample_01	3487	1798	0.138372	0.382228	Impure	Pure	PCF
ACAACCACAAGTGGGT-1	sample_01	2039	1215	0.263314	0.145474	Pure	Impure	BSF
ACAACCACATCCGTGG-1	sample_01	3491	1956	0.0872756	0.360698	Impure	Pure	PCF
ACAACCAGTATGAGCG-1	sample_01	4690	2289	0.114699	0.376877	Impure	Pure	PCF
ACAACCAGTCGTTGCG-1	sample_01	3216	1604	0.0734231	0.399409	Impure	Pure	PCF
ACAACCAGTGTCCACG-1	sample_01	2135	1141	0.266282	0.201677	Pure	Impure	BSF
ACAACCATCAATGCAC-1	sample_01	2199	1313	0.292038	0.200911	Pure	Impure	BSF
ACAACCATCACCTTAT-1	sample_01	3861	2118	0.235942	0.168431	Pure	Impure	BSF
ACAACCATCATCAGTG-1	sample_01	4420	2417	0.132051	0.373677	Impure	Pure	PCF
ACAACCATCTCCGCAT-1	sample_01	3590	1885	0.307282	0.175935	Pure	Impure	BSF
ACAAGCTCACTGATTG-1	sample_01	2494	1269	0.352974	0.158831	Pure	Impure	BSF
ACAAGCTCAGCAGGAT-1	sample_01	864	581	0.193731	0.116204	Pure	Impure	BSF
ACAAGCTTCGTCGATA-1	sample_01	3546	1977	0.147141	0.380351	Impure	Pure	PCF
ACACAGTAGGCTGGAT-1	sample_01	1839	243	0	0.117466	Impure	Pure	PCF
ACACAGTCAATCTCGA-1	sample_01	3353	1740	0.113045	0.387756	Impure	Pure	PCF
ACACAGTCATCAGCAT-1	sample_01	577	423	0.181955	0.116772	Impure	Impure	impure
ACACAGTTCAAATGAG-1	sample_01	3625	1920	0.113923	0.387871	Impure	Pure	PCF
ACACAGTTCGCGTGAC-1	sample_01	1742	957	0.296878	0.206526	Pure	Impure	BSF
ACACCAAAGGATGGCT-1	sample_01	3347	1903	0.0855385	0.385381	Impure	Pure	PCF
ACACCAAAGGCATTTC-1	sample_01	1468	937	0.310667	0.155845	Pure	Impure	BSF
ACACCAACACAAACGG-1	sample_01	4819	2424	0.0682244	0.406923	Impure	Pure	PCF
ACACCAACATATTCGG-1	sample_01	5284	2627	0.0677436	0.392603	Impure	Pure	PCF
ACACCAAGTAGGTAGC-1	sample_01	2904	1639	0.320096	0.1715	Pure	Impure	BSF
ACACCAATCAACCCGG-1	sample_01	5352	2580	0.122622	0.393149	Impure	Pure	PCF
ACACCAATCCACAGGC-1	sample_01	530	399	0.216808	0.096381	Impure	Impure	impure
ACACCAATCCTATTTG-1	sample_01	1819	1083	0.248917	0.141746	Pure	Impure	BSF
ACACCAATCGGACTTA-1	sample_01	5752	2834	0.230532	0.437581	Impure	Pure	PCF
ACACGCGCAAGAATGT-1	sample_01	5643	2604	0.0737821	0.421552	Impure	Pure	PCF
ACACGCGCATCGAACT-1	sample_01	3448	1834	0.110635	0.403347	Impure	Pure	PCF
ACACGCGCATCTCGTC-1	sample_01	3164	1589	0.386071	0.165026	Pure	Impure	BSF
ACACGCGGTACGTAGG-1	sample_01	1482	905	0.240122	0.117401	Pure	Impure	BSF
ACACGCGGTAGCTGCC-1	sample_01	4310	2251	0.0802308	0.416171	Impure	Pure	PCF
ACACGCGTCCTGGCTT-1	sample_01	4339	2274	0.118058	0.35229	Impure	Pure	PCF
ACACGCGTCTTCCAGC-1	sample_01	5053	2610	0.18566	0.36097	Impure	Pure	PCF
ACACTGAAGACCGCCT-1	sample_01	9488	4006	0.166083	0.452405	Impure	Pure	PCF
ACACTGAAGTCTCTGA-1	sample_01	1148	846	0.246795	0.138083	Pure	Impure	BSF
ACACTGACAAACACCT-1	sample_01	3512	1919	0.103712	0.350208	Impure	Pure	PCF
ACACTGACAAACTGCT-1	sample_01	4696	2380	0.108712	0.383869	Impure	Pure	PCF
ACACTGACAACGGCCT-1	sample_01	2970	1579	0.341231	0.180502	Pure	Impure	BSF
ACACTGACAGCCTTCT-1	sample_01	560	435	0.164962	0.110601	Impure	Impure	impure
ACACTGAGTAGCGCCT-1	sample_01	5382	2603	0.132462	0.440341	Impure	Pure	PCF
ACACTGAGTAGTTCCA-1	sample_01	5858	3024	0.23234	0.373405	Pure	Pure	multiplet
ACACTGAGTGCGTGCT-1	sample_01	2658	1534	0.39466	0.195216	Pure	Impure	BSF
ACACTGATCTCACTCG-1	sample_01	2979	1694	0.348917	0.180679	Pure	Impure	BSF
ACACTGATCTCGTGAA-1	sample_01	3512	1721	0.399551	0.182284	Pure	Impure	BSF
ACAGAAAAGTTACGTC-1	sample_01	2465	1353	0.304885	0.184863	Pure	Impure	BSF
ACAGAAACAAATACGA-1	sample_01	2820	1744	0.267135	0.170609	Pure	Impure	BSF
ACAGAAACACGTCGGT-1	sample_01	6180	2742	0.100808	0.457323	Impure	Pure	PCF
ACAGAAACACTCATAG-1	sample_01	5131	2527	0.0453013	0.462933	Impure	Pure	PCF
ACAGAAACAGCTTCGG-1	sample_01	3648	1872	0.0765962	0.37249	Impure	Pure	PCF
ACAGAAAGTACCGCGT-1	sample_01	4786	2273	0.127462	0.346518	Impure	Pure	PCF
ACAGAAATCCATAGAC-1	sample_01	4138	2275	0.0767821	0.343183	Impure	Pure	PCF
ACAGAAATCCATATGG-1	sample_01	2641	1548	0.358321	0.176696	Pure	Impure	BSF
ACAGAAATCGTGGTAT-1	sample_01	3502	1864	0.166256	0.386468	Impure	Pure	PCF
ACAGAAATCTTTCCGG-1	sample_01	4454	2357	0.0295769	0.395387	Impure	Pure	PCF
ACAGCCGAGAAGAGCA-1	sample_01	2061	1328	0.286692	0.183823	Pure	Impure	BSF
ACAGCCGAGTACTGTC-1	sample_01	1946	1157	0.129917	0.335883	Impure	Pure	PCF
ACAGCCGCAAGTGATA-1	sample_01	3213	1802	0.139481	0.379921	Impure	Pure	PCF
ACAGCCGCAGAACTCT-1	sample_01	1927	1029	0.360385	0.146341	Pure	Impure	BSF
ACAGCCGGTCGTCAGC-1	sample_01	4272	2152	0.0856282	0.34698	Impure	Pure	PCF
ACAGCCGGTGTGTGTT-1	sample_01	2578	1489	0.332859	0.167651	Pure	Impure	BSF
ACAGCCGTCAGCTGTA-1	sample_01	3904	2086	0.0498974	0.369498	Impure	Pure	PCF
ACAGCCGTCCTCACTG-1	sample_01	3137	1684	0.131917	0.375861	Impure	Pure	PCF
ACAGGGAAGCACGGAT-1	sample_01	4250	2304	0.0593718	0.327867	Impure	Pure	PCF
ACAGGGAAGTTAGAAC-1	sample_01	5935	2818	0.129654	0.418333	Impure	Pure	PCF
ACAGGGACAACAGAGC-1	sample_01	4917	2476	0.0695962	0.404698	Impure	Pure	PCF
ACAGGGAGTTGGTGTT-1	sample_01	1740	965	0.336224	0.13721	Pure	Impure	BSF
ACAGGGATCATCGACA-1	sample_01	3352	1876	0.114763	0.319437	Impure	Pure	PCF
ACAGGGATCCAAGCTA-1	sample_01	2959	1785	0.0820577	0.353466	Impure	Pure	PCF
ACAGGGATCGCCTTGT-1	sample_01	2036	1286	0.120936	0.318764	Impure	Pure	PCF
ACATCCCAGCCTCATA-1	sample_01	2230	1218	0.279545	0.173365	Pure	Impure	BSF
ACATCCCCAAGTGCTT-1	sample_01	6030	2876	0.134205	0.390171	Impure	Pure	PCF
ACATCCCCATCCGTGG-1	sample_01	5516	2663	0.111224	0.418933	Impure	Pure	PCF
ACATCCCCATGCAGCC-1	sample_01	2884	1652	0.350981	0.218546	Pure	Impure	BSF
ACATCCCGTAGGATAT-1	sample_01	1876	1159	0.251237	0.159438	Pure	Impure	BSF
ACATCCCGTCCTGGTG-1	sample_01	4828	2228	0.0917115	0.368925	Impure	Pure	PCF
ACATCCCGTTCCGCTT-1	sample_01	2967	1473	0.408532	0.17472	Pure	Impure	BSF
ACATCCCTCGCAGAGA-1	sample_01	3484	1897	0.0775256	0.35294	Impure	Pure	PCF
ACATCGAAGTAACGTA-1	sample_01	4237	2210	0.0753077	0.347304	Impure	Pure	PCF
ACATCGAAGTTCGCAT-1	sample_01	1366	864	0.257141	0.136339	Pure	Impure	BSF
ACATCGACAACACGTT-1	sample_01	4602	2387	0.0455192	0.383581	Impure	Pure	PCF
ACATCGACAATGGCCC-1	sample_01	2820	1488	0.356519	0.204452	Pure	Impure	BSF
ACATCGACAGTAGTTC-1	sample_01	5068	2529	0.0634359	0.408819	Impure	Pure	PCF
ACATCGAGTGCGTGCT-1	sample_01	4411	2227	0.0933462	0.431444	Impure	Pure	PCF
ACATCGATCGAGATAA-1	sample_01	2896	1459	0.289981	0.158554	Pure	Impure	BSF
ACATGCAAGCCATCCG-1	sample_01	2159	1374	0.0595321	0.376433	Impure	Pure	PCF
ACATGCAAGGAGATAG-1	sample_01	3683	2020	0.110821	0.350383	Impure	Pure	PCF
ACATGCAAGTCAGCCC-1	sample_01	3831	2149	0.112538	0.413091	Impure	Pure	PCF
ACATGCAAGTCTAGCT-1	sample_01	844	606	0.279224	0.0979663	Pure	Impure	BSF
ACATGCAAGTGGCGAT-1	sample_01	4168	2111	0.081	0.334593	Impure	Pure	PCF
ACATGCACAAATGGTA-1	sample_01	1061	655	0.279827	0.104948	Pure	Impure	BSF
ACATGCACAGAAGTGC-1	sample_01	5630	2668	0.152359	0.432637	Impure	Pure	PCF
ACATGCACATCCTAAG-1	sample_01	5928	2609	0.0544038	0.456343	Impure	Pure	PCF
ACATGCACATCTCGTC-1	sample_01	6184	2765	0.121788	0.492909	Impure	Pure	PCF
ACATGCAGTATTGAGA-1	sample_01	2582	1391	0.341538	0.191038	Pure	Impure	BSF
ACATGCAGTTGTAGCT-1	sample_01	4294	2078	0.125026	0.394369	Impure	Pure	PCF
ACATTTCAGACGGTTG-1	sample_01	3655	1966	0.127301	0.345833	Impure	Pure	PCF
ACATTTCAGCCACAAG-1	sample_01	2599	1532	0.185647	0.357151	Impure	Pure	PCF
ACATTTCAGCGCTGCT-1	sample_01	2094	1099	0.382673	0.195278	Pure	Impure	BSF
ACATTTCAGTTCGCAT-1	sample_01	2099	1114	0.290865	0.169256	Pure	Impure	BSF
ACATTTCCACTCCACT-1	sample_01	3981	1943	0.0968397	0.365766	Impure	Pure	PCF
ACATTTCCAGAGGGTT-1	sample_01	2273	1299	0.312904	0.167881	Pure	Impure	BSF
ACATTTCCAGCGACAA-1	sample_01	2473	1432	0.307269	0.188603	Pure	Impure	BSF
ACATTTCCATGAGTAA-1	sample_01	5178	2576	0.0788333	0.331984	Impure	Pure	PCF
ACATTTCCATGGCCCA-1	sample_01	3285	1802	0.0860449	0.39223	Impure	Pure	PCF
ACATTTCGTGATACCT-1	sample_01	2621	1581	0.35425	0.184095	Pure	Impure	BSF
ACATTTCTCCATATGG-1	sample_01	5322	2555	0.0734103	0.416655	Impure	Pure	PCF
ACATTTCTCCTTTAGT-1	sample_01	1976	1030	0.311731	0.186659	Pure	Impure	BSF
ACATTTCTCGTAGTGT-1	sample_01	1492	827	0.273987	0.152742	Pure	Impure	BSF
ACCAAACAGAAGGCTC-1	sample_01	3558	1935	0.0996218	0.390248	Impure	Pure	PCF
ACCAAACAGCGTGTTT-1	sample_01	2033	1190	0.0897179	0.390008	Impure	Pure	PCF
ACCAAACCAGGTCTCG-1	sample_01	3358	1852	0.207641	0.318546	Impure	Pure	PCF
ACCAAACCAGTCGCAC-1	sample_01	5830	2732	0.0989872	0.432272	Impure	Pure	PCF
ACCAAACGTACCCGAC-1	sample_01	2764	1425	0.328596	0.171692	Pure	Impure	BSF
ACCAAACGTGCTATTG-1	sample_01	2391	1308	0.312429	0.157052	Pure	Impure	BSF
ACCAAACTCTCTCTTC-1	sample_01	2449	1267	0.326	0.159347	Pure	Impure	BSF
ACCAACAAGACTGAGC-1	sample_01	5538	2587	0.077141	0.463413	Impure	Pure	PCF
ACCAACAAGCGCCATC-1	sample_01	1517	905	0.262308	0.133516	Pure	Impure	BSF
ACCAACAAGGAAGTGA-1	sample_01	4821	2423	0.0666667	0.353931	Impure	Pure	PCF
ACCAACAAGGGTGGGA-1	sample_01	4250	2250	0.104372	0.375	Impure	Pure	PCF
ACCAACAAGTTAACGA-1	sample_01	4761	2398	0.0658974	0.362024	Impure	Pure	PCF
ACCAACAAGTTTCGAC-1	sample_01	2799	1491	0.372353	0.192573	Pure	Impure	BSF
ACCAACACAATGTCTG-1	sample_01	4376	2312	0.0800769	0.345563	Impure	Pure	PCF
ACCAACACACGCGCTA-1	sample_01	5397	2628	0.118154	0.411317	Impure	Pure	PCF
ACCAACACAGGTAGTG-1	sample_01	2251	1286	0.365526	0.17005	Pure	Impure	BSF
ACCAACAGTCTGCATA-1	sample_01	2079	1167	0.284571	0.181518	Pure	Impure	BSF
ACCAACAGTGGAAGTC-1	sample_01	2929	1553	0.353244	0.215639	Pure	Impure	BSF
ACCAACAGTGTTCGTA-1	sample_01	3179	1546	0.108404	0.387423	Impure	Pure	PCF
ACCAACAGTTGCAACT-1	sample_01	3398	1944	0.106038	0.381982	Impure	Pure	PCF
ACCAACATCAGCGCGT-1	sample_01	873	545	0.0928654	0.291286	Impure	Pure	PCF
ACCAACATCCGGACGT-1	sample_01	1641	1020	0.202256	0.155627	Pure	Impure	BSF
ACCAACATCTCTGAGA-1	sample_01	4216	2041	0.104269	0.371022	Impure	Pure	PCF
ACCAACATCTGAGGCC-1	sample_01	4263	2074	0.355949	0.169222	Pure	Impure	BSF
ACCACAAAGGAAAGTG-1	sample_01	2010	1328	0.174346	0.383716	Impure	Pure	PCF
ACCACAAGTCAAATCC-1	sample_01	3091	1498	0.408244	0.159554	Pure	Impure	BSF
ACCACAAGTGCGAACA-1	sample_01	4250	2100	0.109	0.431105	Impure	Pure	PCF
ACCACAAGTGCTCCGA-1	sample_01	4575	2372	0.0645128	0.394841	Impure	Pure	PCF
ACCACAAGTTAAAGTG-1	sample_01	942	595	0.0797564	0.254339	Impure	Pure	PCF
ACCACAAGTTAGGACG-1	sample_01	525	415	0.138885	0.105984	Impure	Impure	impure
ACCACAATCACGGGAA-1	sample_01	7086	3237	0.113353	0.495853	Impure	Pure	PCF
ACCACAATCAGAGCAG-1	sample_01	693	530	0.194128	0.137226	Impure	Impure	impure
ACCACAATCCACACCT-1	sample_01	6205	2699	0.0975705	0.429161	Impure	Pure	PCF
ACCACAATCCTGTTGC-1	sample_01	3913	2203	0.356756	0.181478	Pure	Impure	BSF
ACCATTTAGAAGCTCG-1	sample_01	1669	973	0.2995	0.1842	Pure	Impure	BSF
ACCATTTCAACAGATA-1	sample_01	3228	1753	0.341051	0.180623	Pure	Impure	BSF
ACCATTTCACTTGTCC-1	sample_01	2968	1540	0.239987	0.15675	Pure	Impure	BSF
ACCATTTCATTGACTG-1	sample_01	2513	1347	0.336372	0.177081	Pure	Impure	BSF
ACCATTTGTACCGGCT-1	sample_01	4717	2558	0.39909	0.190206	Pure	Impure	BSF
ACCATTTGTGGCAGAT-1	sample_01	4471	2359	0.0560577	0.374891	Impure	Pure	PCF
ACCATTTTCATTCATC-1	sample_01	5863	2631	0.0755833	0.38929	Impure	Pure	PCF
ACCATTTTCTAGTCAG-1	sample_01	1958	1248	0.24175	0.167379	Pure	Impure	BSF
ACCCAAAAGGATCACG-1	sample_01	3315	1838	0.114814	0.433589	Impure	Pure	PCF
ACCCAAAAGTATGGAT-1	sample_01	5376	2666	0.108641	0.444478	Impure	Pure	PCF
ACCCAAACACACGCCA-1	sample_01	4805	2438	0.153128	0.378881	Impure	Pure	PCF
ACCCAAACACCGTCTT-1	sample_01	2019	1222	0.242795	0.15205	Pure	Impure	BSF
ACCCAAACATCCGAAT-1	sample_01	1651	1073	0.283821	0.144859	Pure	Impure	BSF
ACCCAAAGTCCTGTTC-1	sample_01	1402	926	0.326718	0.14929	Pure	Impure	BSF
ACCCAAAGTCGGTGTC-1	sample_01	2167	1307	0.160846	0.386121	Impure	Pure	PCF
ACCCAAATCAGCGCGT-1	sample_01	2158	1338	0.104013	0.371851	Impure	Pure	PCF
ACCCAAATCATCACTT-1	sample_01	4403	2274	0.0458205	0.367419	Impure	Pure	PCF
ACCCAAATCCATTTAC-1	sample_01	9756	4029	0.116269	0.463583	Impure	Pure	PCF
ACCCAAATCCTCTAGC-1	sample_01	3369	1855	0.115673	0.405744	Impure	Pure	PCF
ACCCAAATCTCTCGCA-1	sample_01	3898	2124	0.373071	0.140252	Pure	Impure	BSF
ACCCTCAAGAGCCATG-1	sample_01	1994	1053	0.183974	0.182877	Pure	Impure	BSF
ACCCTCAAGCAACAGC-1	sample_01	4459	2250	0.0869487	0.384415	Impure	Pure	PCF
ACCCTCAAGCTGAAGC-1	sample_01	1472	851	0.399391	0.150085	Pure	Impure	BSF
ACCCTCAAGGCCTAAG-1	sample_01	3188	1823	0.158064	0.427435	Impure	Pure	PCF
ACCCTCACAAGTCCCG-1	sample_01	678	521	0.0788718	0.261214	Impure	Pure	PCF
ACCCTCACAGCAATTC-1	sample_01	3492	1740	0.316526	0.166688	Pure	Impure	BSF
ACCCTCACAGCCGTTG-1	sample_01	3724	1874	0.050891	0.366714	Impure	Pure	PCF
ACCCTCAGTAGACGTG-1	sample_01	4247	2089	0.141423	0.393712	Impure	Pure	PCF
ACCCTCAGTCAGCTTA-1	sample_01	3885	1833	0.121077	0.398294	Impure	Pure	PCF
ACCCTCATCAGTGTTG-1	sample_01	4245	2086	0.0829615	0.343405	Impure	Pure	PCF
ACCCTCATCGAACTCA-1	sample_01	1450	768	0.276891	0.137119	Pure	Impure	BSF
ACCCTCATCGAGTCCG-1	sample_01	613	440	0.146077	0.122308	Impure	Impure	impure
ACCCTCATCTTTCGAT-1	sample_01	4526	2124	0.142654	0.401736	Impure	Pure	PCF
ACCCTTGCAGATTAAG-1	sample_01	1930	986	0.283699	0.171256	Pure	Impure	BSF
ACCCTTGGTACCAGAG-1	sample_01	3622	1826	0.330051	0.15926	Pure	Impure	BSF
ACCCTTGGTCCGACGT-1	sample_01	5316	2793	0.0593077	0.407738	Impure	Pure	PCF
ACCCTTGTCGGATACT-1	sample_01	2063	1196	0.257282	0.167212	Pure	Impure	BSF
ACCCTTGTCGGTAACT-1	sample_01	3520	2051	0.364731	0.152758	Pure	Impure	BSF
ACCGTTCAGACCAGCA-1	sample_01	1155	673	0.245346	0.191671	Pure	Impure	BSF
ACCGTTCAGACTCATC-1	sample_01	1869	1146	0.161359	0.363145	Impure	Pure	PCF
ACCGTTCCACCAGCTG-1	sample_01	736	550	0.183449	0.118192	Pure	Impure	BSF
ACCGTTCCACTGAGGA-1	sample_01	3059	1695	0.0752692	0.389056	Impure	Pure	PCF
ACCGTTCTCAGTCTTT-1	sample_01	619	445	0.132199	0.120306	Impure	Impure	impure
ACCGTTCTCGGACGTC-1	sample_01	1940	970	0.231821	0.172048	Pure	Impure	BSF
ACCTACCCACACCTTC-1	sample_01	2859	1408	0.357667	0.163595	Pure	Impure	BSF
ACCTACCCAGTAGAGC-1	sample_01	2480	1353	0.150064	0.40352	Impure	Pure	PCF
ACCTACCGTCCTCATC-1	sample_01	2072	1191	0.225173	0.189137	Pure	Impure	BSF
ACCTACCGTTCAGCTA-1	sample_01	1065	663	0.16434	0.17705	Impure	Impure	impure
ACCTACCGTTGTAGCT-1	sample_01	775	570	0.197628	0.111667	Impure	Impure	impure
ACCTACCTCACCACAA-1	sample_01	3826	1931	0.42141	0.158268	Pure	Impure	BSF
ACCTACCTCTCTCGCA-1	sample_01	643	477	0.0676859	0.104635	Impure	Impure	impure
ACCTACCTCTGTGCAA-1	sample_01	2673	1427	0.29434	0.177157	Pure	Impure	BSF
ACCTGAAAGCGAGTCA-1	sample_01	4514	2167	0.0947372	0.424599	Impure	Pure	PCF
ACCTGAAAGGTTACAA-1	sample_01	2264	1356	0.119981	0.409716	Impure	Pure	PCF
ACCTGAAAGTTGCCTA-1	sample_01	6491	2913	0.0851218	0.428183	Impure	Pure	PCF
ACCTGAACAAGCTCTA-1	sample_01	2341	1279	0.290506	0.169081	Pure	Impure	BSF
ACCTGAAGTAGTCTGT-1	sample_01	4393	2296	0.0953269	0.436565	Impure	Pure	PCF
ACCTGAAGTGATTCAC-1	sample_01	5166	2512	0.0963333	0.401861	Impure	Pure	PCF
ACCTGAATCATGCGGC-1	sample_01	2705	1445	0.389269	0.184052	Pure	Impure	BSF
ACCTGTCAGCCGGAAT-1	sample_01	4656	2331	0.0923846	0.393478	Impure	Pure	PCF
ACCTGTCAGGTGCTAG-1	sample_01	1609	921	0.237141	0.180536	Pure	Impure	BSF
ACCTGTCCACTCCTTG-1	sample_01	5729	2415	0.134378	0.432593	Impure	Pure	PCF
ACCTGTCCATTGGATC-1	sample_01	4497	2256	0.118045	0.34678	Impure	Pure	PCF
ACCTGTCGTGACAGCA-1	sample_01	1390	893	0.230045	0.148187	Pure	Impure	BSF
ACCTGTCGTGATACTC-1	sample_01	4873	2470	0.0886154	0.368456	Impure	Pure	PCF
ACCTGTCGTTACACAC-1	sample_01	677	520	0.194282	0.12395	Pure	Impure	BSF
ACCTGTCTCACTAGCA-1	sample_01	529	383	0.165558	0.0863214	Impure	Impure	impure
ACCTGTCTCGATTGAC-1	sample_01	3400	1903	0.0837308	0.366494	Impure	Pure	PCF
ACGATCAAGGATGGCT-1	sample_01	3145	1768	0.103288	0.343581	Impure	Pure	PCF
ACGATCACACCGTGCA-1	sample_01	2665	1486	0.316679	0.178188	Pure	Impure	BSF
ACGATCACATTGGATC-1	sample_01	3402	1866	0.0952949	0.372722	Impure	Pure	PCF
ACGATCAGTCCTCAGG-1	sample_01	3511	1695	0.373821	0.158518	Pure	Impure	BSF
ACGATCAGTTAATCGC-1	sample_01	1875	1106	0.329538	0.164121	Pure	Impure	BSF
ACGATCATCACATTGG-1	sample_01	2690	1374	0.314462	0.18075	Pure	Impure	BSF
ACGATCATCATTGGTG-1	sample_01	3508	1787	0.277718	0.198925	Pure	Impure	BSF
ACGATCATCTGAGAAA-1	sample_01	3773	2095	0.103442	0.344377	Impure	Pure	PCF
ACGATGTAGAATGTTG-1	sample_01	4583	2400	0.0544423	0.368107	Impure	Pure	PCF
ACGATGTAGATACAGT-1	sample_01	1424	930	0.243949	0.174748	Pure	Impure	BSF
ACGATGTAGCAAACAT-1	sample_01	503	349	0.136321	0.0971111	Impure	Impure	impure
ACGATGTAGGTGGGTT-1	sample_01	2424	1303	0.266615	0.156883	Pure	Impure	BSF
ACGATGTAGTATGCAA-1	sample_01	5669	2717	0.102385	0.387022	Impure	Pure	PCF
ACGATGTCAAGATGGC-1	sample_01	2561	1479	0.168013	0.347718	Impure	Pure	PCF
ACGATGTTCCCTCTTT-1	sample_01	4042	2127	0.127782	0.341494	Impure	Pure	PCF
ACGATGTTCCGCTGTT-1	sample_01	818	590	0.230506	0.136563	Impure	Impure	impure
ACGATGTTCCGGTAGC-1	sample_01	3204	1743	0.125449	0.39606	Impure	Pure	PCF
ACGATGTTCCTCAGAA-1	sample_01	2714	1520	0.337872	0.196319	Pure	Impure	BSF
ACGATGTTCGCTCTAC-1	sample_01	597	427	0.132897	0.123222	Impure	Impure	impure
ACGATGTTCTTGGATG-1	sample_01	3176	1640	0.0797372	0.398036	Impure	Pure	PCF
ACGCACGAGGAGCAAA-1	sample_01	1469	868	0.322532	0.195383	Pure	Impure	BSF
ACGCACGAGGCGCTTC-1	sample_01	2221	1200	0.298167	0.15052	Pure	Impure	BSF
ACGCACGAGTTCACTG-1	sample_01	5600	2651	0.0959679	0.429577	Impure	Pure	PCF
ACGCACGCAGACACCC-1	sample_01	2965	1613	0.133423	0.39898	Impure	Pure	PCF
ACGCACGCAGAGAAAG-1	sample_01	2761	1572	0.285821	0.197175	Pure	Impure	BSF
ACGCACGGTCTGTGTA-1	sample_01	4423	2278	0.0968782	0.377179	Impure	Pure	PCF
ACGCACGGTGATTAGA-1	sample_01	3533	1901	0.119769	0.347873	Impure	Pure	PCF
ACGCACGGTGCAATAA-1	sample_01	4502	2345	0.0811667	0.378381	Impure	Pure	PCF
ACGCACGTCAAATAGG-1	sample_01	2281	1430	0.271859	0.193696	Pure	Impure	BSF
ACGCACGTCAGAGTTC-1	sample_01	2828	1526	0.37	0.189905	Pure	Impure	BSF
ACGCACGTCATCTACT-1	sample_01	2034	1331	0.253026	0.173095	Pure	Impure	BSF
ACGCACGTCATGCCAA-1	sample_01	2944	1710	0.126417	0.403615	Impure	Pure	PCF
ACGCACGTCGCAGAGA-1	sample_01	2484	1576	0.141224	0.354262	Impure	Pure	PCF
ACGCACGTCGGCATCG-1	sample_01	2515	1338	0.300923	0.187655	Pure	Impure	BSF
ACGCACGTCGTCGCTT-1	sample_01	1789	1208	0.113782	0.273899	Impure	Pure	PCF
ACGGAAGAGCCGATCC-1	sample_01	653	488	0.146647	0.139885	Impure	Impure	impure
ACGGAAGAGGCATCGA-1	sample_01	2410	1559	0.113103	0.353688	Impure	Pure	PCF
ACGGAAGAGGCCACCT-1	sample_01	1536	977	0.318686	0.161125	Pure	Impure	BSF
ACGGAAGCAAAGCAAT-1	sample_01	1320	868	0.197109	0.15331	Pure	Impure	BSF
ACGGAAGCAAGGTACG-1	sample_01	639	474	0.230782	0.124887	Impure	Impure	impure
ACGGAAGCAGGAGACT-1	sample_01	1723	946	0.258333	0.160208	Pure	Impure	BSF
ACGGAAGCATCATTGG-1	sample_01	2879	1485	0.214641	0.20581	Pure	Impure	BSF
ACGGAAGGTCGGTGAA-1	sample_01	5765	2680	0.0642179	0.441468	Impure	Pure	PCF
ACGGAAGGTTGACTGT-1	sample_01	3243	1837	0.1025	0.362548	Impure	Pure	PCF
ACGGAAGTCGGCTATA-1	sample_01	3323	1749	0.131327	0.385764	Impure	Pure	PCF
ACGGGTCAGAAGTCCG-1	sample_01	4807	2404	0.103782	0.339685	Impure	Pure	PCF
ACGGGTCCACTCTGCT-1	sample_01	2753	1505	0.339571	0.173365	Pure	Impure	BSF
ACGGGTCCAGGACTAG-1	sample_01	3483	1841	0.362038	0.210853	Pure	Impure	BSF
ACGGGTCGTACTGCCG-1	sample_01	1999	920	0.22041	0.175544	Pure	Impure	BSF
ACGGGTCGTCACTTCC-1	sample_01	4874	2433	0.0534615	0.356462	Impure	Pure	PCF
ACGGGTCGTGATGGCA-1	sample_01	2115	1350	0.274769	0.155556	Pure	Impure	BSF
ACGGGTCGTGCAGTGA-1	sample_01	1322	918	0.103782	0.326425	Impure	Pure	PCF
ACGGGTCGTGTGAGCA-1	sample_01	4431	2342	0.12141	0.40402	Impure	Pure	PCF
ACGGGTCGTTTGTTGG-1	sample_01	2966	1674	0.151199	0.387103	Impure	Pure	PCF
ACGGGTCTCATTACCT-1	sample_01	2662	1487	0.346244	0.177762	Pure	Impure	BSF
ACGGGTCTCGGAATTC-1	sample_01	6041	2683	0.126679	0.470319	Impure	Pure	PCF
ACGGGTCTCTCGCCTA-1	sample_01	7381	3085	0.149782	0.460161	Impure	Pure	PCF
ACGGGTCTCTGTGCGG-1	sample_01	2480	1505	0.171891	0.396185	Impure	Pure	PCF
ACGGTCGAGAGCATCG-1	sample_01	1901	1263	0.113346	0.280097	Impure	Pure	PCF
ACGGTCGAGCTTAGTC-1	sample_01	1315	791	0.227192	0.174823	Pure	Impure	BSF
ACGGTCGAGGACTGGT-1	sample_01	1296	783	0.232032	0.178845	Pure	Impure	BSF
ACGGTCGCAACCCTCT-1	sample_01	1742	929	0.283269	0.164385	Pure	Impure	BSF
ACGGTCGCAACTGTGT-1	sample_01	4916	2407	0.0588718	0.417518	Impure	Pure	PCF
ACGGTCGCAAGACCTT-1	sample_01	2604	1478	0.280179	0.190212	Pure	Impure	BSF
ACGGTCGCACACGCCA-1	sample_01	2692	1546	0.0998718	0.378716	Impure	Pure	PCF
ACGGTCGCAGTGAGCA-1	sample_01	4763	2314	0.0693974	0.370056	Impure	Pure	PCF
ACGGTCGGTACATACC-1	sample_01	4335	2148	0.101596	0.358067	Impure	Pure	PCF
ACGGTCGTCATACGAC-1	sample_01	1966	1225	0.264955	0.147369	Pure	Impure	BSF
ACGGTCGTCATGCTAG-1	sample_01	3304	1763	0.083641	0.357147	Impure	Pure	PCF
ACGGTCGTCCTAGCGG-1	sample_01	3406	1837	0.0905128	0.334859	Impure	Pure	PCF
ACGGTTAAGATTCGAA-1	sample_01	1250	800	0.276795	0.170075	Pure	Impure	BSF
ACGGTTAAGTAATTGG-1	sample_01	3273	1889	0.0862115	0.339913	Impure	Pure	PCF
ACGGTTACAGGCGTTC-1	sample_01	1795	1078	0.303038	0.181518	Pure	Impure	BSF
ACGGTTAGTACACGTT-1	sample_01	4256	2126	0.11659	0.408911	Impure	Pure	PCF
ACGGTTAGTAGCCCTG-1	sample_01	4131	2108	0.0709615	0.344917	Impure	Pure	PCF
ACGGTTAGTATGCTTG-1	sample_01	3563	1788	0.163821	0.399544	Impure	Pure	PCF
ACGGTTAGTCATAACC-1	sample_01	508	398	0.183205	0.131679	Impure	Impure	impure
ACGGTTAGTCTTGGTA-1	sample_01	4702	2346	0.0831218	0.336016	Impure	Pure	PCF
ACGGTTATCGCAGAGA-1	sample_01	561	425	0.165744	0.0958571	Impure	Impure	impure
ACGTAACAGGATTTAG-1	sample_01	651	482	0.162346	0.119119	Impure	Impure	impure
ACGTAACCACTACTTT-1	sample_01	5045	2474	0.110186	0.340758	Impure	Pure	PCF
ACGTAACCAGAACCGA-1	sample_01	3467	1845	0.123192	0.36601	Impure	Pure	PCF
ACGTAACGTAATGCTC-1	sample_01	3271	1759	0.0732692	0.358433	Impure	Pure	PCF
ACGTAACGTATCTCTT-1	sample_01	3681	1777	0.348365	0.194238	Pure	Impure	BSF
ACGTAACTCAGAGTGG-1	sample_01	2433	1324	0.280628	0.148038	Pure	Impure	BSF
ACGTAACTCAGGGATG-1	sample_01	3252	1746	0.371603	0.173714	Pure	Impure	BSF
ACGTAACTCATGTCTT-1	sample_01	3908	1778	0.336494	0.185087	Pure	Impure	BSF
ACGTAACTCCCTCGTA-1	sample_01	2927	1706	0.214981	0.256869	Impure	Pure	PCF
ACGTACACAAATTAGG-1	sample_01	4407	2340	0.0991603	0.379944	Impure	Pure	PCF
ACGTACACACCGGTCA-1	sample_01	3834	1977	0.159519	0.363732	Impure	Pure	PCF
ACGTACACAGGTTTAC-1	sample_01	1865	1115	0.350981	0.166407	Pure	Impure	BSF
ACGTACACATATCTGG-1	sample_01	585	431	0.167526	0.134704	Impure	Impure	impure
ACGTACAGTCAACACT-1	sample_01	538	397	0.0823077	0.0910417	Impure	Impure	impure
ACGTACAGTTGCCTAA-1	sample_01	6611	2912	0.116128	0.455952	Impure	Pure	PCF
ACGTACATCACGGAGA-1	sample_01	4748	2461	0.0887821	0.403958	Impure	Pure	PCF
ACGTACATCATGCCCT-1	sample_01	6333	2783	0.125519	0.461877	Impure	Pure	PCF
ACGTACATCATTTCGT-1	sample_01	3697	1840	0.0895962	0.363677	Impure	Pure	PCF
ACGTACATCCCTCGTA-1	sample_01	2609	1435	0.208449	0.356452	Impure	Pure	PCF
ACGTACATCCGCACTT-1	sample_01	2917	1549	0.154192	0.3733	Impure	Pure	PCF
ACGTACATCTGTGCAA-1	sample_01	3422	1818	0.119865	0.349946	Impure	Pure	PCF
ACGTACATCTTTGCAT-1	sample_01	2007	1084	0.393481	0.152869	Pure	Impure	BSF
ACGTAGTAGGCAGCTA-1	sample_01	1549	1083	0.302878	0.181105	Pure	Impure	BSF
ACGTAGTAGTGGGAAA-1	sample_01	6041	2994	0.267692	0.352663	Pure	Pure	multiplet
ACGTAGTCAACCAGAG-1	sample_01	5937	2875	0.298013	0.36298	Pure	Pure	multiplet
ACGTAGTCACAATGTC-1	sample_01	893	680	0.210288	0.10569	Pure	Impure	BSF
ACGTAGTCAGCTCGGT-1	sample_01	2893	1525	0.327282	0.196427	Pure	Impure	BSF
ACGTAGTGTCGAGATG-1	sample_01	6304	2999	0.319179	0.35519	Impure	Pure	PCF
ACGTAGTTCAGACCCG-1	sample_01	4715	2316	0.0737564	0.383562	Impure	Pure	PCF
ACGTAGTTCAGCGCAC-1	sample_01	6010	2688	0.0998077	0.406817	Impure	Pure	PCF
ACGTAGTTCGGCTGTG-1	sample_01	2207	1279	0.0791667	0.36345	Impure	Pure	PCF
ACGTAGTTCTCCCAAC-1	sample_01	1135	672	0.252115	0.166034	Pure	Impure	BSF
ACGTAGTTCTCTCAAT-1	sample_01	5105	2540	0.0989808	0.377861	Impure	Pure	PCF
ACGTAGTTCTGCTCTG-1	sample_01	3175	1761	0.328955	0.169341	Pure	Impure	BSF
ACGTCCTAGACCAGAC-1	sample_01	2131	1313	0.11434	0.336595	Impure	Pure	PCF
ACGTCCTAGGACAAGA-1	sample_01	4781	2572	0.209071	0.304861	Impure	Pure	PCF
ACGTCCTAGGATACCG-1	sample_01	5414	2639	0.0912821	0.415472	Impure	Pure	PCF
ACGTCCTAGGTACAGC-1	sample_01	3932	2021	0.119314	0.402472	Impure	Pure	PCF
ACGTCCTAGGTTAAAC-1	sample_01	4118	2106	0.108878	0.379054	Impure	Pure	PCF
ACGTCCTAGTCCCAGC-1	sample_01	3719	2084	0.045359	0.403117	Impure	Pure	PCF
ACGTCCTTCGCAGTGC-1	sample_01	3661	1945	0.126551	0.356383	Impure	Pure	PCF
ACGTCCTTCTACGGTA-1	sample_01	3125	1713	0.283301	0.182617	Pure	Impure	BSF
ACGTCCTTCTCTCCGA-1	sample_01	556	440	0.100359	0.0964325	Impure	Impure	impure
ACGTTCCAGAGGATCC-1	sample_01	5379	2526	0.0918462	0.454887	Impure	Pure	PCF
ACGTTCCAGGAGCAAA-1	sample_01	3733	2068	0.0994615	0.395808	Impure	Pure	PCF
ACGTTCCAGGCTCCCA-1	sample_01	6126	2850	0.0937051	0.485246	Impure	Pure	PCF
ACGTTCCAGTAGGCCA-1	sample_01	1085	730	0.239558	0.177794	Pure	Impure	BSF
ACGTTCCAGTCCTGTA-1	sample_01	2699	1551	0.122571	0.388008	Impure	Pure	PCF
ACGTTCCAGTCGGCAA-1	sample_01	5645	2595	0.117622	0.401855	Impure	Pure	PCF
ACGTTCCCACACCTAA-1	sample_01	1998	1150	0.353987	0.177802	Pure	Impure	BSF
ACGTTCCCACATTGTG-1	sample_01	4136	2193	0.0757564	0.344383	Impure	Pure	PCF
ACGTTCCCACCTAAAC-1	sample_01	8012	3503	0.141686	0.499401	Impure	Pure	PCF
ACGTTCCCATCCTGTC-1	sample_01	4520	2182	0.0565705	0.429232	Impure	Pure	PCF
ACGTTCCGTAAGGCCA-1	sample_01	3307	1773	0.364218	0.183683	Pure	Impure	BSF
ACGTTCCGTGAGACGT-1	sample_01	955	616	0.195301	0.150825	Pure	Impure	BSF
ACGTTCCTCCGTATGA-1	sample_01	3574	1889	0.123622	0.347252	Impure	Pure	PCF
ACGTTCCTCGACCATA-1	sample_01	4452	2329	0.109756	0.327827	Impure	Pure	PCF
ACTACGAAGAGCCATG-1	sample_01	1633	1015	0.247231	0.179927	Pure	Impure	BSF
ACTACGAAGATAGTGT-1	sample_01	1050	611	0.32391	0.156123	Pure	Impure	BSF
ACTACGAAGCATAGGC-1	sample_01	535	378	0.184365	0.0820218	Impure	Impure	impure
ACTACGAAGTAGGGTC-1	sample_01	2761	1478	0.298923	0.172421	Pure	Impure	BSF
ACTACGACACCAGACC-1	sample_01	3889	1883	0.120872	0.412825	Impure	Pure	PCF
ACTACGACACCCTATC-1	sample_01	1205	782	0.23975	0.200065	Pure	Impure	BSF
ACTACGACACTTTATC-1	sample_01	1818	1093	0.261205	0.129637	Pure	Impure	BSF
ACTACGACATATAGCC-1	sample_01	2825	1459	0.339417	0.149891	Pure	Impure	BSF
ACTACGAGTAACGATA-1	sample_01	1968	1126	0.390782	0.217667	Pure	Impure	BSF
ACTACGAGTGCCGGTT-1	sample_01	5087	2384	0.0786026	0.40578	Impure	Pure	PCF
ACTACGATCATCGCTC-1	sample_01	2480	1503	0.321404	0.134583	Pure	Impure	BSF
ACTATCTAGCGATCGA-1	sample_01	1097	685	0.211013	0.138988	Pure	Impure	BSF
ACTATCTAGCGTACAG-1	sample_01	1021	782	0.238013	0.145992	Pure	Impure	BSF
ACTATCTAGCTAAACA-1	sample_01	6046	2762	0.121545	0.464484	Impure	Pure	PCF
ACTATCTCACCAGTAT-1	sample_01	724	571	0.282429	0.109645	Pure	Impure	BSF
ACTATCTCATGTGCTA-1	sample_01	3985	2137	0.0864744	0.41773	Impure	Pure	PCF
ACTATCTGTTCCCAAA-1	sample_01	2782	1552	0.418788	0.199177	Pure	Impure	BSF
ACTATGGAGACCGCCT-1	sample_01	2282	1260	0.332955	0.176492	Pure	Impure	BSF
ACTATGGAGACGCCCT-1	sample_01	4330	2105	0.0857885	0.405093	Impure	Pure	PCF
ACTATGGAGCCAAGCA-1	sample_01	3544	1958	0.179321	0.334716	Impure	Pure	PCF
ACTATGGAGTAAACTG-1	sample_01	2809	1510	0.283372	0.159883	Pure	Impure	BSF
ACTATGGCAAGTCGTT-1	sample_01	3009	1656	0.105699	0.381099	Impure	Pure	PCF
ACTATGGCAGCGACAA-1	sample_01	2296	1341	0.279897	0.14797	Pure	Impure	BSF
ACTATGGCAGGCTATT-1	sample_01	2182	1189	0.285788	0.183236	Pure	Impure	BSF
ACTATGGCAGTTGGTT-1	sample_01	576	428	0.219327	0.0963829	Impure	Impure	impure
ACTATGGCAGTTGTCA-1	sample_01	3125	1685	0.124051	0.32769	Impure	Pure	PCF
ACTATGGGTCCCAAAT-1	sample_01	1158	827	0.319782	0.135544	Pure	Impure	BSF
ACTATGGGTTAAGGAT-1	sample_01	2246	1344	0.2595	0.201091	Pure	Impure	BSF
ACTATGGTCAGGTAAA-1	sample_01	4199	2214	0.0775128	0.389077	Impure	Pure	PCF
ACTATTCCAAGGGCAT-1	sample_01	1523	878	0.254455	0.168657	Pure	Impure	BSF
ACTATTCCAGAACTTC-1	sample_01	2596	1454	0.140231	0.391954	Impure	Pure	PCF
ACTATTCCATCTTCGC-1	sample_01	3997	2116	0.124833	0.351335	Impure	Pure	PCF
ACTATTCCATGCCGAC-1	sample_01	2025	982	0.394135	0.165429	Pure	Impure	BSF
ACTATTCTCCAACTAG-1	sample_01	2684	1602	0.285013	0.164393	Pure	Impure	BSF
ACTATTCTCGCGCTGA-1	sample_01	3568	2139	0.0250769	0.381875	Impure	Pure	PCF
ACTATTCTCGGTGAAG-1	sample_01	3537	1801	0.0835897	0.396484	Impure	Pure	PCF
ACTCCCAAGAGCAACC-1	sample_01	1265	863	0.220801	0.142571	Pure	Impure	BSF
ACTCCCAAGCAAGTCG-1	sample_01	3641	2037	0.0706987	0.324226	Impure	Pure	PCF
ACTCCCAAGGTGTGAC-1	sample_01	3248	1814	0.0685449	0.393089	Impure	Pure	PCF
ACTCCCACAATTTCGG-1	sample_01	1374	853	0.278058	0.138885	Pure	Impure	BSF
ACTCCCACACACCAGC-1	sample_01	3225	1717	0.357942	0.167425	Pure	Impure	BSF
ACTCCCAGTCACTAGT-1	sample_01	3256	1826	0.11875	0.339768	Impure	Pure	PCF
ACTCCCAGTCGCATTA-1	sample_01	3660	1976	0.0752115	0.36531	Impure	Pure	PCF
ACTCCCAGTTGATGTC-1	sample_01	2633	1484	0.302032	0.167512	Pure	Impure	BSF
ACTCCCATCTGAGGCC-1	sample_01	4875	2470	0.147923	0.360427	Impure	Pure	PCF
ACTCCCATCTTGATTC-1	sample_01	4607	2422	0.111192	0.412758	Impure	Pure	PCF
ACTCTCGAGGGTGGGA-1	sample_01	2664	1526	0.154987	0.352284	Impure	Pure	PCF
ACTCTCGCAATACCCA-1	sample_01	1351	890	0.226814	0.163919	Pure	Impure	BSF
ACTCTCGCAGCTGTAT-1	sample_01	3422	1816	0.355859	0.181383	Pure	Impure	BSF
ACTCTCGTCAGTCACA-1	sample_01	3311	1858	0.0795256	0.344776	Impure	Pure	PCF
ACTCTCGTCCTCTAAT-1	sample_01	4799	2424	0.112923	0.423169	Impure	Pure	PCF
ACTGATGAGCCATTTG-1	sample_01	3678	1824	0.358808	0.191044	Pure	Impure	BSF
ACTGATGAGCCTAACT-1	sample_01	554	425	0.236006	0.10081	Impure	Impure	impure
ACTGATGAGCGTATAA-1	sample_01	2573	1413	0.164577	0.34981	Impure	Pure	PCF
ACTGATGAGTACCGGA-1	sample_01	2782	1471	0.387353	0.168095	Pure	Impure	BSF
ACTGATGCAAGTGATA-1	sample_01	4336	2189	0.110135	0.419798	Impure	Pure	PCF
ACTGATGCAATCAAGA-1	sample_01	3240	1851	0.0652308	0.371413	Impure	Pure	PCF
ACTGATGCATCATCTT-1	sample_01	2943	1526	0.396141	0.174187	Pure	Impure	BSF
ACTGATGCATCTCCCA-1	sample_01	2595	1410	0.338205	0.157071	Pure	Impure	BSF
ACTGATGGTCATCAGT-1	sample_01	1351	805	0.247288	0.169119	Pure	Impure	BSF
ACTGATGGTCGGAAAC-1	sample_01	3808	1915	0.103404	0.354728	Impure	Pure	PCF
ACTGATGTCAAACTGC-1	sample_01	4749	2394	0.068	0.361494	Impure	Pure	PCF
ACTGATGTCATAGACC-1	sample_01	2943	1600	0.421397	0.15974	Pure	Impure	BSF
ACTGATGTCCATAGAC-1	sample_01	2759	1465	0.357147	0.180583	Pure	Impure	BSF
ACTGATGTCGACACCG-1	sample_01	5549	2562	0.101897	0.395813	Impure	Pure	PCF
ACTGCAAAGAGCCGTA-1	sample_01	2946	1727	0.0759423	0.353893	Impure	Pure	PCF
ACTGCAACACTTTATC-1	sample_01	1203	693	0.242981	0.147502	Pure	Impure	BSF
ACTGCAACATTGCTGA-1	sample_01	4656	2312	0.0745641	0.370258	Impure	Pure	PCF
ACTGCAATCAGCTGAT-1	sample_01	2765	1426	0.128333	0.44803	Impure	Pure	PCF
ACTGCAATCATCACTT-1	sample_01	2073	1163	0.288955	0.145099	Pure	Impure	BSF
ACTGCAATCTTCGATT-1	sample_01	2324	1454	0.377276	0.159875	Pure	Impure	BSF
ACTGTCCAGAACCCGA-1	sample_01	4119	2199	0.139103	0.374427	Impure	Pure	PCF
ACTGTCCCAAAGCTCT-1	sample_01	1770	1067	0.165615	0.347365	Impure	Pure	PCF
ACTGTCCCAACCCTAA-1	sample_01	2472	1528	0.106154	0.379405	Impure	Pure	PCF
ACTGTCCCAGAGATGC-1	sample_01	3774	1971	0.0976154	0.359937	Impure	Pure	PCF
ACTGTCCCATGCACTA-1	sample_01	2500	1333	0.290167	0.211819	Pure	Impure	BSF
ACTGTCCTCAAGCCTA-1	sample_01	2427	1215	0.38584	0.159008	Pure	Impure	BSF
ACTGTCCTCCATAAGC-1	sample_01	2668	1438	0.379622	0.1625	Pure	Impure	BSF
ACTGTGAAGCCTGAGA-1	sample_01	2194	1196	0.379019	0.198841	Pure	Impure	BSF
ACTGTGAAGCGACTGA-1	sample_01	3291	1867	0.116301	0.391978	Impure	Pure	PCF
ACTGTGAAGCTGTCCG-1	sample_01	3402	1904	0.100327	0.367601	Impure	Pure	PCF
ACTGTGACAACGACAG-1	sample_01	1337	763	0.213276	0.176022	Pure	Impure	BSF
ACTGTGACAGCAGATG-1	sample_01	4158	2110	0.0993846	0.382736	Impure	Pure	PCF
ACTTAGGAGCGTTGTT-1	sample_01	2021	1180	0.331891	0.162663	Pure	Impure	BSF
ACTTAGGCACATCATG-1	sample_01	2803	1493	0.345699	0.160774	Pure	Impure	BSF
ACTTAGGCATGTACGT-1	sample_01	2268	1246	0.404141	0.193075	Pure	Pure	multiplet
ACTTAGGGTCCTGTCT-1	sample_01	2163	1209	0.309308	0.190841	Pure	Impure	BSF
ACTTAGGTCGGAACTT-1	sample_01	2223	1460	0.338987	0.169079	Pure	Impure	BSF
ACTTATCAGGTCGTCC-1	sample_01	3891	2021	0.0961667	0.384851	Impure	Pure	PCF
ACTTATCAGTAGGCCA-1	sample_01	762	525	0.177795	0.15671	Impure	Impure	impure
ACTTATCAGTGCTAGG-1	sample_01	3424	1879	0.115833	0.400792	Impure	Pure	PCF
ACTTATCAGTGGAATT-1	sample_01	1691	921	0.249827	0.162306	Pure	Impure	BSF
ACTTATCCAATAGGAT-1	sample_01	3494	1944	0.33009	0.174302	Pure	Impure	BSF
ACTTATCGTGGACTAG-1	sample_01	3530	1729	0.346827	0.169321	Pure	Impure	BSF
ACTTATCGTTGCATTG-1	sample_01	4448	2171	0.0654295	0.3808	Impure	Pure	PCF
ACTTATCTCAGCGCAC-1	sample_01	1121	740	0.215891	0.193859	Pure	Impure	BSF
ACTTCCGAGCGAGGAG-1	sample_01	4617	2451	0.061609	0.380339	Impure	Pure	PCF
ACTTCCGAGTAATACG-1	sample_01	1682	1146	0.250179	0.202583	Pure	Impure	BSF
ACTTCCGCAACAAGAT-1	sample_01	4877	2381	0.12291	0.4112	Impure	Pure	PCF
ACTTCCGGTTGTCAGT-1	sample_01	5674	2526	0.0878333	0.411425	Impure	Pure	PCF
ACTTCCGTCATGTCAG-1	sample_01	1601	801	0.360481	0.173345	Pure	Impure	BSF
ACTTCCGTCCGTGCGA-1	sample_01	4466	2268	0.0530513	0.347917	Impure	Pure	PCF
ACTTCCGTCGCTCTAC-1	sample_01	5240	2618	0.165199	0.392028	Impure	Pure	PCF
ACTTCCGTCGTTCTGC-1	sample_01	6508	2726	0.0907692	0.484294	Impure	Pure	PCF
ACTTCGCAGAGGTTAT-1	sample_01	2133	1267	0.359615	0.149171	Pure	Impure	BSF
ACTTCGCAGCATCTTG-1	sample_01	3656	2064	0.157987	0.334514	Impure	Pure	PCF
ACTTCGCAGTCAGCGA-1	sample_01	4999	2221	0.0666603	0.380409	Impure	Pure	PCF
ACTTCGCCAAGAAACT-1	sample_01	2126	1215	0.325288	0.16776	Pure	Impure	BSF
ACTTCGCCAAGATTGA-1	sample_01	506	406	0.185603	0.117976	Impure	Impure	impure
ACTTCGCCATTGACAC-1	sample_01	6051	2678	0.123929	0.472067	Impure	Pure	PCF
ACTTCGCGTACATTGC-1	sample_01	3244	1914	0.34184	0.176879	Pure	Impure	BSF
ACTTCGCGTAGGACTG-1	sample_01	3056	1815	0.118378	0.336554	Impure	Pure	PCF
ACTTCGCGTATAGCTC-1	sample_01	2565	1442	0.113385	0.326851	Impure	Pure	PCF
ACTTCGCGTCCACATA-1	sample_01	3268	1900	0.109321	0.346194	Impure	Pure	PCF
ACTTCGCGTCTGATCA-1	sample_01	2144	1294	0.0713077	0.398587	Impure	Pure	PCF
ACTTCGCGTGTCCAAT-1	sample_01	1332	885	0.272397	0.150482	Pure	Impure	BSF
ACTTCGCGTTGTTTGG-1	sample_01	3289	1699	0.384135	0.173764	Pure	Impure	BSF
ACTTCGCTCAAGTTGC-1	sample_01	5166	2472	0.180577	0.297722	Impure	Pure	PCF
ACTTTCAAGGGTGAGG-1	sample_01	4037	2098	0.124679	0.38802	Impure	Pure	PCF
ACTTTCAAGTCATAGA-1	sample_01	3745	1985	0.0897179	0.403861	Impure	Pure	PCF
ACTTTCACAACTCCAA-1	sample_01	5324	2509	0.150654	0.422548	Impure	Pure	PCF
ACTTTCACAATGTTGC-1	sample_01	816	599	0.195744	0.150688	Impure	Impure	impure
ACTTTCAGTAATGCGG-1	sample_01	4055	2050	0.0925	0.334073	Impure	Pure	PCF
ACTTTCAGTTACCCAA-1	sample_01	2297	1375	0.277526	0.156964	Pure	Impure	BSF
ACTTTGTAGCCAAGTG-1	sample_01	5065	2580	0.0517885	0.354349	Impure	Pure	PCF
ACTTTGTAGCGTACAG-1	sample_01	1521	1011	0.323173	0.174252	Pure	Impure	BSF
ACTTTGTCACACGGTC-1	sample_01	3581	1867	0.060859	0.356978	Impure	Pure	PCF
ACTTTGTCATCCGATA-1	sample_01	576	431	0.214173	0.0807163	Impure	Impure	impure
ACTTTGTGTCGCCACA-1	sample_01	1437	918	0.314109	0.146202	Pure	Impure	BSF
ACTTTGTTCAGCGCAC-1	sample_01	4481	2263	0.0739487	0.428565	Impure	Pure	PCF
ACTTTGTTCCATGATG-1	sample_01	4798	2401	0.0813077	0.399058	Impure	Pure	PCF
ACTTTGTTCCCTTTGG-1	sample_01	3745	1952	0.0920321	0.380641	Impure	Pure	PCF
ACTTTGTTCTCCCAAC-1	sample_01	2053	1018	0.130846	0.318034	Impure	Pure	PCF
ACTTTGTTCTCGACGG-1	sample_01	2171	1093	0.29241	0.196798	Pure	Impure	BSF
AGAAATGAGAACTGAT-1	sample_01	1998	1285	0.310205	0.190062	Pure	Impure	BSF
AGAAATGAGAGAATCT-1	sample_01	2077	1333	0.258474	0.185266	Pure	Impure	BSF
AGAAATGAGCTACTAC-1	sample_01	3942	2053	0.0593718	0.40047	Impure	Pure	PCF
AGAAATGAGGTGGCTA-1	sample_01	4682	2429	0.0706667	0.390855	Impure	Pure	PCF
AGAACAAAGACTTCAC-1	sample_01	4936	2575	0.120558	0.39947	Impure	Pure	PCF
AGAACAAAGCGAGTAC-1	sample_01	3661	2031	0.110276	0.406375	Impure	Pure	PCF
AGAACAACAACTCCAA-1	sample_01	2060	1298	0.34566	0.17422	Pure	Impure	BSF
AGAACAACAGAGTGTG-1	sample_01	2658	1396	0.344032	0.186438	Pure	Impure	BSF
AGAACAACATTGAGCT-1	sample_01	527	366	0.154167	0.0967302	Impure	Impure	impure
AGAACAAGTGCCTATA-1	sample_01	3932	1968	0.175455	0.414131	Impure	Pure	PCF
AGAACAAGTGGAAATT-1	sample_01	3992	2043	0.0697051	0.400595	Impure	Pure	PCF
AGAACAAGTGGTTCTA-1	sample_01	3578	1866	0.142917	0.380778	Impure	Pure	PCF
AGAACAATCAGCAGAG-1	sample_01	2097	1212	0.345308	0.176238	Pure	Impure	BSF
AGAACAATCGAGTACT-1	sample_01	1910	1008	0.397404	0.191931	Pure	Impure	BSF
AGAACAATCTGTTGGA-1	sample_01	5478	2772	0.196071	0.325819	Impure	Pure	PCF
AGAACAATCTTCGGTC-1	sample_01	1602	967	0.300378	0.118605	Pure	Impure	BSF
AGAACCTAGACTTAAG-1	sample_01	3788	2003	0.27334	0.184758	Pure	Impure	BSF
AGAACCTAGAGTTGAT-1	sample_01	4197	2283	0.277006	0.258448	Impure	Pure	PCF
AGAACCTAGCTCTTCC-1	sample_01	706	536	0.236301	0.150274	Pure	Impure	BSF
AGAACCTAGGTCCCGT-1	sample_01	2162	1224	0.241353	0.185885	Pure	Impure	BSF
AGAACCTGTGCGGCTT-1	sample_01	1506	868	0.316474	0.169179	Pure	Impure	BSF
AGAACCTTCAAAGACA-1	sample_01	5111	2626	0.0532436	0.419151	Impure	Pure	PCF
AGAACCTTCCCTCTTT-1	sample_01	2772	1249	0.343186	0.167524	Pure	Impure	BSF
AGAACCTTCCGCCTAT-1	sample_01	6309	3068	0.341103	0.311857	Pure	Pure	multiplet
AGAACCTTCTCTCAAT-1	sample_01	2442	1377	0.0927628	0.393806	Impure	Pure	PCF
AGAACCTTCTTACCGC-1	sample_01	4096	1985	0.374936	0.161831	Pure	Impure	BSF
AGAAGCGAGAGATTCA-1	sample_01	4170	2208	0.0954487	0.39645	Impure	Pure	PCF
AGAAGCGAGCACTCTA-1	sample_01	2723	1616	0.107654	0.354921	Impure	Pure	PCF
AGAAGCGAGGTACCTT-1	sample_01	4123	2195	0.118231	0.342903	Impure	Pure	PCF
AGAAGCGAGTTGGGAC-1	sample_01	1859	1130	0.343045	0.200978	Pure	Impure	BSF
AGAAGCGCAACCCTAA-1	sample_01	991	656	0.217026	0.187056	Pure	Impure	BSF
AGAAGCGCAATGAAAC-1	sample_01	2663	1478	0.384167	0.186788	Pure	Impure	BSF
AGAAGCGCACAAATGA-1	sample_01	4447	2296	0.0678205	0.450065	Impure	Pure	PCF
AGAAGCGCACAGCATT-1	sample_01	2861	1502	0.339506	0.202306	Pure	Impure	BSF
AGAAGCGCAGAAGCGT-1	sample_01	2408	1334	0.370872	0.169798	Pure	Impure	BSF
AGAAGCGGTAGATTGA-1	sample_01	3512	2005	0.0917821	0.349998	Impure	Pure	PCF
AGAAGTAAGACCCGCT-1	sample_01	1745	1017	0.455705	0.161141	Pure	Impure	BSF
AGAAGTAAGACCTTTG-1	sample_01	1554	913	0.31575	0.165262	Pure	Impure	BSF
AGAAGTAAGATTGAGT-1	sample_01	4426	2341	0.342269	0.15631	Pure	Impure	BSF
AGAAGTAAGCTCGCAC-1	sample_01	3406	1847	0.127417	0.385083	Impure	Pure	PCF
AGAAGTACATGACTGT-1	sample_01	3363	1858	0.103737	0.354506	Impure	Pure	PCF
AGAAGTACATGGGTCC-1	sample_01	4437	2223	0.109981	0.370367	Impure	Pure	PCF
AGAAGTAGTTAGGCTT-1	sample_01	2419	1387	0.333506	0.183286	Pure	Impure	BSF
AGAAGTATCAACTCTT-1	sample_01	3280	1602	0.332199	0.170647	Pure	Impure	BSF
AGAAGTATCAAGTCGT-1	sample_01	3098	1645	0.389397	0.197395	Pure	Impure	BSF
AGAAGTATCCGTGTGG-1	sample_01	4123	2164	0.125346	0.373071	Impure	Pure	PCF
AGAAGTATCGGCAGTC-1	sample_01	3910	2111	0.0534872	0.330911	Impure	Pure	PCF
AGAAGTATCTCGAACA-1	sample_01	2149	1214	0.329782	0.14853	Pure	Impure	BSF
AGACAAAAGTCAACAA-1	sample_01	2342	1534	0.13309	0.386337	Impure	Pure	PCF
AGACAAAGTAGCCCTG-1	sample_01	2232	1312	0.341513	0.181014	Pure	Impure	BSF
AGACAAAGTTGCAACT-1	sample_01	2496	1409	0.338699	0.17899	Pure	Impure	BSF
AGACAAATCATCGTAG-1	sample_01	2297	1404	0.133032	0.369692	Impure	Pure	PCF
AGACAAATCCCGTTGT-1	sample_01	1446	885	0.326526	0.151782	Pure	Impure	BSF
AGACAAATCTGACGCG-1	sample_01	582	443	0.183891	0.0905556	Impure	Impure	impure
AGACACTAGACCTCAT-1	sample_01	2707	1442	0.14891	0.392254	Impure	Pure	PCF
AGACACTAGTGCCTCG-1	sample_01	2993	1538	0.288955	0.137587	Pure	Impure	BSF
AGACACTCACTAGTAC-1	sample_01	7365	3149	0.0825897	0.480625	Impure	Pure	PCF
AGACACTCACTCCTTG-1	sample_01	501	374	0.121282	0.091625	Impure	Impure	impure
AGACACTGTTTGGAAA-1	sample_01	2523	1407	0.213442	0.357119	Impure	Pure	PCF
AGACACTTCGCTGACG-1	sample_01	1265	642	0.182186	0.169889	Pure	Impure	BSF
AGACAGGCATCGCTCT-1	sample_01	5399	2638	0.11409	0.42153	Impure	Pure	PCF
AGACAGGGTAGGCTCC-1	sample_01	4346	2097	0.101071	0.407589	Impure	Pure	PCF
AGACAGGGTTTACCTT-1	sample_01	3582	1838	0.0719359	0.340841	Impure	Pure	PCF
AGACAGGTCCAACTGA-1	sample_01	566	440	0.184026	0.126516	Impure	Impure	impure
AGACAGGTCTCCATAT-1	sample_01	2023	1175	0.317622	0.200165	Pure	Impure	BSF
AGACAGGTCTGTCCGT-1	sample_01	4061	2219	0.145276	0.399756	Impure	Pure	PCF
AGACCATAGCACTCGC-1	sample_01	2007	1209	0.341064	0.153825	Pure	Impure	BSF
AGACCATAGCGTGAGT-1	sample_01	2015	1080	0.344301	0.152778	Pure	Impure	BSF
AGACCATAGGGCCAAT-1	sample_01	3264	1707	0.354071	0.176857	Pure	Impure	BSF
AGACCATAGTATGAAC-1	sample_01	635	497	0.105051	0.105141	Impure	Impure	impure
AGACCATCAGTCTACA-1	sample_01	2352	1327	0.314628	0.202843	Pure	Impure	BSF
AGACCATCATCTTTCA-1	sample_01	552	391	0.132141	0.0971548	Impure	Impure	impure
AGACCATGTACTGTTG-1	sample_01	2820	1563	0.336801	0.179881	Pure	Impure	BSF
AGACCATGTCTACTGA-1	sample_01	6439	3034	0.192532	0.301113	Pure	Pure	multiplet
AGACCATTCGCACGAC-1	sample_01	3071	1602	0.0778654	0.342161	Impure	Pure	PCF
AGACCCGAGTCTCCTC-1	sample_01	2353	1209	0.264622	0.16525	Pure	Impure	BSF
AGACCCGGTTTCTATC-1	sample_01	4600	2051	0.085109	0.387002	Impure	Pure	PCF
AGACCCGTCGGTCACG-1	sample_01	3117	1769	0.133635	0.34355	Impure	Pure	PCF
AGACCCGTCTCTTAAC-1	sample_01	5556	2647	0.0685513	0.391915	Impure	Pure	PCF
AGACCCGTCTTTGATC-1	sample_01	2003	1112	0.326962	0.197802	Pure	Impure	BSF
AGACTCAAGAATCTAG-1	sample_01	1602	969	0.311878	0.166917	Pure	Impure	BSF
AGACTCAAGAGTCTTC-1	sample_01	5361	2632	0.0835	0.42145	Impure	Pure	PCF
AGACTCAAGGAACATT-1	sample_01	2601	1637	0.122051	0.40094	Impure	Pure	PCF
AGACTCAAGTATTCCG-1	sample_01	2839	1618	0.0809103	0.313165	Impure	Pure	PCF
AGACTCACACTCAAGT-1	sample_01	1315	857	0.201801	0.173506	Pure	Impure	BSF
AGACTCAGTATTCCGA-1	sample_01	7028	3019	0.124712	0.438044	Impure	Pure	PCF
AGACTCAGTGGCAACA-1	sample_01	5646	2600	0.122103	0.40569	Impure	Pure	PCF
AGACTCATCAGACATC-1	sample_01	1178	758	0.301538	0.143563	Pure	Impure	BSF
AGACTCATCGCTTGAA-1	sample_01	1504	820	0.293974	0.166704	Pure	Impure	BSF
AGAGAATAGGCCTAGA-1	sample_01	5918	2898	0.0838077	0.376187	Impure	Pure	PCF
AGAGAATAGTGAACAT-1	sample_01	4420	2346	0.137808	0.393274	Impure	Pure	PCF
AGAGAATGTCATCTAG-1	sample_01	2958	1624	0.104981	0.399284	Impure	Pure	PCF
AGAGAATGTGCCTGAC-1	sample_01	6387	3164	0.0989359	0.427101	Impure	Pure	PCF
AGAGAATGTTGTGCAT-1	sample_01	2684	1437	0.311154	0.203829	Pure	Impure	BSF
AGAGAATTCAAGCCAT-1	sample_01	3284	1872	0.0796154	0.374304	Impure	Pure	PCF
AGAGAATTCACGGAGA-1	sample_01	1992	1192	0.32741	0.163238	Pure	Impure	BSF
AGAGAATTCCAGGACC-1	sample_01	606	421	0.28259	0.136254	Pure	Impure	BSF
AGAGAATTCCCGTTCA-1	sample_01	1994	1302	0.369776	0.181054	Pure	Impure	BSF
AGAGAATTCGCTTTAT-1	sample_01	951	612	0.165455	0.123494	Pure	Impure	BSF
AGAGAATTCGTTATCT-1	sample_01	5099	2499	0.0649487	0.403946	Impure	Pure	PCF
AGAGAGCCAGCGATTT-1	sample_01	1712	1028	0.243449	0.166389	Pure	Impure	BSF
AGAGAGCCATGACGAG-1	sample_01	2815	1495	0.348917	0.191889	Pure	Impure	BSF
AGAGAGCGTCTTCTAT-1	sample_01	1003	683	0.360019	0.152062	Pure	Impure	BSF
AGAGAGCTCCATGAGT-1	sample_01	1643	1153	0.266776	0.154782	Pure	Impure	BSF
AGAGAGCTCCGATGCG-1	sample_01	1325	830	0.298359	0.137556	Pure	Impure	BSF
AGAGCAGAGACTTCGT-1	sample_01	3014	1667	0.305808	0.17873	Pure	Impure	BSF
AGAGCAGAGCCTAACT-1	sample_01	2112	1271	0.370712	0.178716	Pure	Impure	BSF
AGAGCAGAGCTCCATA-1	sample_01	1796	1162	0.305167	0.136294	Pure	Impure	BSF
AGAGCAGCAAACACCT-1	sample_01	3845	2094	0.131788	0.37105	Impure	Pure	PCF
AGAGCAGCAACAACAA-1	sample_01	1298	802	0.307737	0.134647	Pure	Impure	BSF
AGAGCAGCACGTAGTT-1	sample_01	617	437	0.198564	0.131478	Impure	Impure	impure
AGAGCAGGTCCGGACT-1	sample_01	4109	2099	0.0575256	0.385746	Impure	Pure	PCF
AGAGCAGGTGCCTGAC-1	sample_01	1754	1036	0.285135	0.185796	Pure	Impure	BSF
AGAGCAGGTGGCTGAA-1	sample_01	2981	1588	0.10384	0.375835	Impure	Pure	PCF
AGAGCAGTCGCGGACT-1	sample_01	1836	1121	0.350468	0.163101	Pure	Impure	BSF
AGAGCCCAGGGCCCTT-1	sample_01	1835	989	0.279949	0.203978	Pure	Impure	BSF
AGAGCCCAGGTTATAG-1	sample_01	508	388	0.148949	0.097256	Impure	Impure	impure
AGAGCCCCAACTCCAA-1	sample_01	3264	1922	0.18859	0.352752	Impure	Pure	PCF
AGAGCCCCAATTGCTG-1	sample_01	3711	2112	0.0839551	0.334901	Impure	Pure	PCF
AGAGCCCCAGGACAGT-1	sample_01	3826	1978	0.0893397	0.359145	Impure	Pure	PCF
AGAGCCCGTAGGATAT-1	sample_01	3050	1747	0.102077	0.358641	Impure	Pure	PCF
AGAGCCCGTGGCTGCT-1	sample_01	3345	1860	0.115	0.363673	Impure	Pure	PCF
AGAGCCCGTGGTAATA-1	sample_01	1453	915	0.367109	0.195506	Pure	Impure	BSF
AGATAGAAGCCTGTCG-1	sample_01	2108	1253	0.271019	0.2167	Pure	Impure	BSF
AGATAGAAGTGGATAT-1	sample_01	2704	1544	0.108417	0.400752	Impure	Pure	PCF
AGATAGACACTGTGAT-1	sample_01	1317	756	0.232103	0.149532	Pure	Impure	BSF
AGATAGACATCCTTCG-1	sample_01	2359	1276	0.263	0.178841	Pure	Impure	BSF
AGATAGACATGTCGTA-1	sample_01	1601	851	0.262513	0.187849	Pure	Impure	BSF
AGATAGAGTATGCTTG-1	sample_01	2735	1515	0.153923	0.380008	Impure	Pure	PCF
AGATAGAGTTCGGTAT-1	sample_01	2982	1768	0.108679	0.324804	Impure	Pure	PCF
AGATAGATCTAAGGAA-1	sample_01	629	494	0.161295	0.110044	Impure	Impure	impure
AGATCCAAGCAATAAC-1	sample_01	1175	811	0.306077	0.169819	Pure	Impure	BSF
AGATCCAAGCATACTC-1	sample_01	4558	2401	0.110481	0.332845	Impure	Pure	PCF
AGATCCAAGCCAGAGT-1	sample_01	2328	1321	0.157519	0.395167	Impure	Pure	PCF
AGATCCACACGTTCGG-1	sample_01	1987	1145	0.336321	0.173784	Pure	Impure	BSF
AGATCCACAGCGTGCT-1	sample_01	4236	2122	0.122327	0.398228	Impure	Pure	PCF
AGATCCAGTCGCATCG-1	sample_01	2139	1114	0.331026	0.191772	Pure	Impure	BSF
AGATCCAGTGCAACGA-1	sample_01	3609	1788	0.309846	0.160466	Pure	Impure	BSF
AGATCCATCCGATTAG-1	sample_01	1794	1048	0.406109	0.157766	Pure	Impure	BSF
AGATCCATCGAATCCA-1	sample_01	3001	1587	0.135647	0.415704	Impure	Pure	PCF
AGATCGTAGTAGAGTT-1	sample_01	1453	865	0.275	0.176095	Pure	Impure	BSF
AGATCGTAGTAGGTTA-1	sample_01	3639	2196	0.0987051	0.374567	Impure	Pure	PCF
AGATCGTAGTAGTGCG-1	sample_01	3141	1807	0.115103	0.357022	Impure	Pure	PCF
AGATCGTCACAAACGG-1	sample_01	5259	2708	0.328776	0.245333	Pure	Pure	multiplet
AGATCGTGTCACTCTC-1	sample_01	1898	1089	0.338564	0.17596	Pure	Impure	BSF
AGATCGTGTCATATGC-1	sample_01	4565	2500	0.113429	0.341504	Impure	Pure	PCF
AGATCGTGTCCACTTC-1	sample_01	3303	1618	0.294699	0.189821	Pure	Impure	BSF
AGATCGTTCAGCTTGA-1	sample_01	1032	698	0.213519	0.159857	Pure	Impure	BSF
AGATGAAAGATTAGAC-1	sample_01	2054	1210	0.263763	0.19747	Pure	Impure	BSF
AGATGAAAGTGTACAA-1	sample_01	4103	2168	0.0772179	0.424427	Impure	Pure	PCF
AGATGAAGTAGGCTGA-1	sample_01	3788	2150	0.324205	0.189706	Pure	Impure	BSF
AGATGAAGTCAGGTAG-1	sample_01	2160	1238	0.320353	0.175643	Pure	Impure	BSF
AGATGAAGTTCGGCCA-1	sample_01	2972	1532	0.233686	0.185819	Pure	Impure	BSF
AGATGAATCCCTCGTA-1	sample_01	528	365	0.152417	0.113034	Impure	Impure	impure
AGATGAATCCTCGCAT-1	sample_01	3212	1821	0.130872	0.353919	Impure	Pure	PCF
AGATGAATCGCAATGT-1	sample_01	1795	938	0.300853	0.17775	Pure	Impure	BSF
AGATGAATCTTAGCCC-1	sample_01	1394	820	0.300385	0.159675	Pure	Impure	BSF
AGATGCTAGCTGGAGT-1	sample_01	4084	2200	0.130532	0.364942	Impure	Pure	PCF
AGATGCTAGGGAACAA-1	sample_01	2827	1584	0.326205	0.164313	Pure	Impure	BSF
AGATGCTCACAGAGCA-1	sample_01	1659	1054	0.321795	0.181292	Pure	Impure	BSF
AGATGCTCAGAGTAAT-1	sample_01	1103	801	0.235551	0.171236	Pure	Impure	BSF
AGATGCTGTCGTTTCC-1	sample_01	1413	945	0.323692	0.18554	Pure	Impure	BSF
AGATGCTGTTAGAAAC-1	sample_01	3228	1833	0.0885	0.383577	Impure	Pure	PCF
AGCATCAAGTATAACG-1	sample_01	1822	1213	0.102885	0.351266	Impure	Pure	PCF
AGCATCAGTCTCGCGA-1	sample_01	3580	1927	0.0938782	0.369911	Impure	Pure	PCF
AGCATCATCACCCATC-1	sample_01	3563	1836	0.306872	0.201216	Pure	Pure	multiplet
AGCCAATCACTGGATT-1	sample_01	614	452	0.182429	0.100077	Impure	Impure	impure
AGCCAATGTACCAGAG-1	sample_01	4518	2271	0.0941859	0.372496	Impure	Pure	PCF
AGCCAATGTATGAGCG-1	sample_01	4764	2439	0.0538462	0.395073	Impure	Pure	PCF
AGCCAATTCCCATTCG-1	sample_01	1578	923	0.257551	0.184802	Pure	Impure	BSF
AGCCAATTCCTTGAAG-1	sample_01	2932	1591	0.161314	0.342135	Impure	Pure	PCF
AGCCAATTCTAGACAC-1	sample_01	5047	2615	0.310506	0.201839	Pure	Pure	multiplet
AGCCACGAGCGATGGT-1	sample_01	2051	1238	0.40134	0.201798	Pure	Impure	BSF
AGCCACGAGGTCGCCT-1	sample_01	2771	1458	0.144538	0.364385	Impure	Pure	PCF
AGCCACGCAACGGTAG-1	sample_01	4682	2343	0.0665897	0.402571	Impure	Pure	PCF
AGCCACGCAGACTCTA-1	sample_01	3970	2137	0.178712	0.332964	Impure	Pure	PCF
AGCCACGGTACTCGAT-1	sample_01	3469	1965	0.0537692	0.351456	Impure	Pure	PCF
AGCCACGGTCGAGTGA-1	sample_01	4103	2152	0.0768974	0.39579	Impure	Pure	PCF
AGCCACGGTTGTGGCC-1	sample_01	2525	1375	0.296686	0.147978	Pure	Impure	BSF
AGCCACGTCGTCAACA-1	sample_01	3030	1605	0.139218	0.373091	Impure	Pure	PCF
AGCCACGTCTAGTACG-1	sample_01	1810	1050	0.252115	0.180435	Pure	Impure	BSF
AGCCACGTCTCGTGAA-1	sample_01	5040	2437	0.0328269	0.415567	Impure	Pure	PCF
AGCCAGCAGAGAAGGT-1	sample_01	1699	1154	0.145051	0.354244	Impure	Pure	PCF
AGCCAGCAGAGCAAGA-1	sample_01	1422	877	0.275071	0.163772	Pure	Impure	BSF
AGCCAGCAGATCACTC-1	sample_01	3696	1975	0.107885	0.414653	Impure	Pure	PCF
AGCCAGCAGGGCAAGG-1	sample_01	1980	1108	0.323218	0.178651	Pure	Impure	BSF
AGCCAGCAGGTGAGAA-1	sample_01	2199	1379	0.273846	0.186393	Pure	Impure	BSF
AGCCAGCCATGGAATA-1	sample_01	4716	2422	0.0737628	0.396833	Impure	Pure	PCF
AGCCAGCGTACTTGTG-1	sample_01	596	428	0.135558	0.108073	Impure	Impure	impure
AGCCAGCGTCCGAAGA-1	sample_01	2244	1230	0.441532	0.150317	Pure	Impure	BSF
AGCCAGCTCATGAAAG-1	sample_01	3860	2277	0.099141	0.370226	Impure	Pure	PCF
AGCCAGCTCCCACAGG-1	sample_01	1557	864	0.321667	0.164359	Pure	Impure	BSF
AGCGATTAGAGAGGTA-1	sample_01	1962	1117	0.278135	0.165437	Pure	Impure	BSF
AGCGATTCACCCTAAA-1	sample_01	4264	2355	0.0751795	0.339097	Impure	Pure	PCF
AGCGATTCACTTGACA-1	sample_01	2969	1607	0.0889936	0.364952	Impure	Pure	PCF
AGCGATTCAGTCGGTC-1	sample_01	1744	986	0.224788	0.153635	Pure	Impure	BSF
AGCGCCAAGACAAGCC-1	sample_01	2446	1286	0.30609	0.201724	Pure	Impure	BSF
AGCGCCAAGGTGGGTT-1	sample_01	3202	1645	0.382308	0.204145	Pure	Impure	BSF
AGCGCCACATGCAGCC-1	sample_01	6509	2900	0.099109	0.477403	Impure	Pure	PCF
AGCGCCACATGGCCAC-1	sample_01	2347	1514	0.0546474	0.367905	Impure	Pure	PCF
AGCGCCATCGCCGAAC-1	sample_01	2185	1280	0.257782	0.163256	Pure	Impure	BSF
AGCGCTGAGAGGCTGT-1	sample_01	5578	2700	0.0727885	0.364363	Impure	Pure	PCF
AGCGCTGAGCCTCTCT-1	sample_01	2049	1165	0.291365	0.14297	Pure	Impure	BSF
AGCGCTGCAATCCTAG-1	sample_01	6275	2875	0.144192	0.470565	Impure	Pure	PCF
AGCGCTGCACCAGTAT-1	sample_01	9373	3656	0.246987	0.352546	Pure	Pure	multiplet
AGCGCTGGTAGCTTGT-1	sample_01	3850	1971	0.0522564	0.414889	Impure	Pure	PCF
AGCGCTGTCATTTCCA-1	sample_01	3391	1940	0.109333	0.345452	Impure	Pure	PCF
AGCGTATAGTCTAGCT-1	sample_01	3174	1715	0.290532	0.190629	Pure	Impure	BSF
AGCGTATCACACCTAA-1	sample_01	3773	1992	0.103923	0.35375	Impure	Pure	PCF
AGCGTATGTTACCGTA-1	sample_01	2658	1414	0.297333	0.188319	Pure	Impure	BSF
AGCGTATTCAAGGAGC-1	sample_01	3015	1692	0.343179	0.145843	Pure	Impure	BSF
AGCGTATTCACAAGAA-1	sample_01	3765	2148	0.0488974	0.342853	Impure	Pure	PCF
AGCGTATTCCAAGCAT-1	sample_01	3536	1984	0.0954231	0.407188	Impure	Pure	PCF
AGCGTCGAGCCTTTCC-1	sample_01	1257	901	0.116949	0.271173	Impure	Pure	PCF
AGCGTCGCAACGGGTA-1	sample_01	1312	918	0.154462	0.146546	Pure	Impure	BSF
AGCGTCGCAGGCAATG-1	sample_01	1827	1265	0.0919872	0.329167	Impure	Pure	PCF
AGCGTCGCATTGGCAT-1	sample_01	928	669	0.193353	0.106123	Impure	Impure	impure
AGCGTCGGTCCATCTC-1	sample_01	2239	1449	0.108192	0.352417	Impure	Pure	PCF
AGCTACAAGGCTGAAC-1	sample_01	4918	2430	0.0291474	0.485865	Impure	Pure	PCF
AGCTACAAGTTAACAG-1	sample_01	2280	1325	0.129013	0.367861	Impure	Pure	PCF
AGCTACACAAGCAATA-1	sample_01	2570	1341	0.329692	0.169246	Pure	Impure	BSF
AGCTACACAATAGGAT-1	sample_01	558	424	0.117192	0.126933	Impure	Impure	impure
AGCTACACACATTCTT-1	sample_01	4436	2419	0.123179	0.390597	Impure	Pure	PCF
AGCTACACATATCTGG-1	sample_01	2357	1288	0.344814	0.173948	Pure	Impure	BSF
AGCTACAGTGTAGTGG-1	sample_01	2645	1401	0.300942	0.212992	Pure	Impure	BSF
AGCTACATCCACTTCG-1	sample_01	5021	2492	0.113814	0.399022	Impure	Pure	PCF
AGCTACATCCTGTTGC-1	sample_01	2080	1134	0.288769	0.167946	Pure	Impure	BSF
AGCTACATCGTGGGAA-1	sample_01	1711	993	0.422154	0.190677	Pure	Impure	BSF
AGCTCAAAGCACTCCG-1	sample_01	3567	1939	0.112237	0.433058	Impure	Pure	PCF
AGCTCAAAGGTCATAA-1	sample_01	1246	901	0.128205	0.310923	Impure	Pure	PCF
AGCTCAACATCATCTT-1	sample_01	3345	1939	0.111955	0.340052	Impure	Pure	PCF
AGCTCAACATGTGGCC-1	sample_01	5407	2631	0.131212	0.365891	Impure	Pure	PCF
AGCTCAAGTAAGCAAT-1	sample_01	3430	1843	0.0859744	0.362204	Impure	Pure	PCF
AGCTCAATCACACGAT-1	sample_01	2801	1573	0.319186	0.205865	Pure	Impure	BSF
AGCTCAATCGAGAAGC-1	sample_01	3475	1920	0.131744	0.423927	Impure	Pure	PCF
AGCTCAATCTTCCCGA-1	sample_01	5483	2726	0.116494	0.395901	Impure	Pure	PCF
AGCTTCCAGCCTCAAT-1	sample_01	2108	1202	0.348212	0.181673	Pure	Impure	BSF
AGCTTCCCACGGCGTT-1	sample_01	3068	1641	0.373282	0.177875	Pure	Impure	BSF
AGCTTCCCACTCAGAT-1	sample_01	9265	3588	0.143167	0.468198	Impure	Pure	PCF
AGCTTCCCATCGCCTT-1	sample_01	4062	2230	0.10525	0.375335	Impure	Pure	PCF
AGCTTCCCATTGCTTT-1	sample_01	2421	1372	0.358071	0.170008	Pure	Impure	BSF
AGCTTCCGTAGAGGAA-1	sample_01	1937	1149	0.25584	0.170774	Pure	Impure	BSF
AGCTTCCGTCTATGAC-1	sample_01	1904	1051	0.290269	0.17551	Pure	Impure	BSF
AGCTTCCGTGTATCCA-1	sample_01	3020	1786	0.152577	0.404143	Impure	Pure	PCF
AGCTTCCTCGGCGATC-1	sample_01	1927	1028	0.306731	0.148633	Pure	Impure	BSF
AGCTTCCTCTGTCCCA-1	sample_01	4304	2216	0.0938141	0.402129	Impure	Pure	PCF
AGCTTCCTCTTGCGCT-1	sample_01	2044	1162	0.25966	0.15573	Pure	Impure	BSF
AGGAAATAGAAACTCA-1	sample_01	858	600	0.269449	0.172127	Pure	Impure	BSF
AGGAAATAGCCACCGT-1	sample_01	4707	2355	0.140199	0.437716	Impure	Pure	PCF
AGGAAATAGTAAACGT-1	sample_01	1921	1058	0.298929	0.16306	Pure	Impure	BSF
AGGAAATCAACATACC-1	sample_01	514	397	0.120487	0.0869325	Impure	Impure	impure
AGGAAATCAATCGCAT-1	sample_01	1064	710	0.22759	0.126323	Pure	Impure	BSF
AGGAAATCAATTAGGA-1	sample_01	3383	1858	0.419071	0.201052	Pure	Pure	multiplet
AGGAAATCACGGTGAA-1	sample_01	3205	1833	0.10575	0.415567	Impure	Pure	PCF
AGGAAATCAGCCTATA-1	sample_01	3084	1875	0.26125	0.332196	Impure	Pure	PCF
AGGAAATCAGTCGAGA-1	sample_01	2155	1248	0.100737	0.332173	Impure	Pure	PCF
AGGAAATCATCGTTCC-1	sample_01	1295	1024	0.224212	0.251085	Impure	Pure	PCF
AGGAAATCATTGTAGC-1	sample_01	1659	984	0.244526	0.152373	Pure	Impure	BSF
AGGAAATGTATCAGCT-1	sample_01	4761	2337	0.0794038	0.392032	Impure	Pure	PCF
AGGAAATGTCATTGCA-1	sample_01	2747	1406	0.155032	0.415607	Impure	Pure	PCF
AGGAAATGTTATAGCC-1	sample_01	4034	2114	0.115737	0.412593	Impure	Pure	PCF
AGGAATAGTAATCAGA-1	sample_01	552	424	0.132763	0.0973175	Impure	Impure	impure
AGGAATAGTCTGTGGC-1	sample_01	4743	2386	0.126263	0.351167	Impure	Pure	PCF
AGGAATATCGATACTG-1	sample_01	1999	1105	0.279647	0.186266	Pure	Impure	BSF
AGGACGAAGAAATTCG-1	sample_01	4182	2323	0.0563846	0.381798	Impure	Pure	PCF
AGGACGAAGCCAGTAG-1	sample_01	522	366	0.100173	0.102702	Impure	Impure	impure
AGGACGACACAGTCAT-1	sample_01	3300	1837	0.0609744	0.331238	Impure	Pure	PCF
AGGACGAGTACCGTCG-1	sample_01	3595	1803	0.342788	0.163575	Pure	Impure	BSF
AGGACGAGTAGCGATG-1	sample_01	1806	1023	0.351103	0.135399	Pure	Impure	BSF
AGGACGAGTGCATCTA-1	sample_01	683	521	0.162904	0.123591	Impure	Impure	impure
AGGACGAGTTTCGGCG-1	sample_01	4282	2300	0.113628	0.364796	Impure	Pure	PCF
AGGACGATCACGTAGT-1	sample_01	7458	3424	0.0857949	0.52178	Impure	Pure	PCF
AGGACGATCCAGGACC-1	sample_01	5272	2504	0.306692	0.219401	Pure	Impure	BSF
AGGACGATCGAGCACC-1	sample_01	5869	2687	0.132314	0.432464	Impure	Pure	PCF
AGGACTTAGTGCGTCC-1	sample_01	3144	1714	0.274558	0.22281	Pure	Impure	BSF
AGGACTTCAAACTAAG-1	sample_01	4562	2372	0.104109	0.399704	Impure	Pure	PCF
AGGACTTGTATGTGTC-1	sample_01	1541	893	0.22934	0.16546	Pure	Impure	BSF
AGGACTTGTGAGCCAA-1	sample_01	5184	2613	0.0717756	0.440115	Impure	Pure	PCF
AGGACTTTCCCGAGTG-1	sample_01	3484	2022	0.0549231	0.341504	Impure	Pure	PCF
AGGACTTTCGCAGAGA-1	sample_01	4908	2526	0.0562756	0.390718	Impure	Pure	PCF
AGGAGGTAGAATTTGG-1	sample_01	6002	2780	0.100622	0.437843	Impure	Pure	PCF
AGGAGGTAGGTTAAAC-1	sample_01	5064	2565	0.100936	0.37004	Impure	Pure	PCF
AGGAGGTAGTACAACA-1	sample_01	3363	1891	0.07825	0.394484	Impure	Pure	PCF
AGGAGGTCAACAAGTA-1	sample_01	1933	1095	0.248788	0.147141	Pure	Impure	BSF
AGGAGGTCACCTGATA-1	sample_01	2321	1279	0.255577	0.179032	Pure	Impure	BSF
AGGAGGTGTAAGCGGT-1	sample_01	3474	1782	0.0625192	0.354974	Impure	Pure	PCF
AGGAGGTGTGCGACAA-1	sample_01	1552	909	0.298269	0.167544	Pure	Impure	BSF
AGGAGGTTCACTAGCA-1	sample_01	2477	1392	0.394583	0.185865	Pure	Impure	BSF
AGGAGGTTCCACTGGG-1	sample_01	3974	2072	0.0635449	0.388411	Impure	Pure	PCF
AGGAGGTTCCTGTAGA-1	sample_01	2124	1405	0.0822821	0.361296	Impure	Pure	PCF
AGGAGGTTCGAATGCT-1	sample_01	3015	1665	0.109801	0.331099	Impure	Pure	PCF
AGGAGGTTCGACGACC-1	sample_01	4188	2203	0.0877179	0.37701	Impure	Pure	PCF
AGGAGGTTCGGATAAA-1	sample_01	2836	1589	0.145224	0.37725	Impure	Pure	PCF
AGGAGGTTCTGCATAG-1	sample_01	2798	1575	0.167096	0.382663	Impure	Pure	PCF
AGGATAAAGCGTATAA-1	sample_01	1556	930	0.300564	0.162387	Pure	Impure	BSF
AGGATAACATGTTACG-1	sample_01	3869	1976	0.309981	0.133706	Pure	Impure	BSF
AGGATAAGTAGTGATA-1	sample_01	1477	862	0.3705	0.152798	Pure	Impure	BSF
AGGATAAGTCCTACAA-1	sample_01	2991	1504	0.399949	0.18651	Pure	Impure	BSF
AGGATAAGTTAGAGTA-1	sample_01	4748	2389	0.0982949	0.409831	Impure	Pure	PCF
AGGATAAGTTCAATCG-1	sample_01	2113	1252	0.29691	0.176863	Pure	Impure	BSF
AGGATAATCAAACGAA-1	sample_01	3942	2264	0.0972308	0.375879	Impure	Pure	PCF
AGGATAATCCAGCCTT-1	sample_01	5117	2473	0.129295	0.395992	Impure	Pure	PCF
AGGATCTAGCAATTAG-1	sample_01	631	500	0.262538	0.100492	Impure	Impure	impure
AGGATCTAGCTAGCCC-1	sample_01	5812	2610	0.104865	0.443919	Impure	Pure	PCF
AGGATCTAGGGCAGAG-1	sample_01	1438	894	0.326885	0.17304	Pure	Impure	BSF
AGGATCTCACCTGAAT-1	sample_01	4330	2225	0.0805385	0.366421	Impure	Pure	PCF
AGGATCTGTACGATTC-1	sample_01	5744	2668	0.105571	0.444411	Impure	Pure	PCF
AGGATCTGTTTCCAAG-1	sample_01	4744	2420	0.140301	0.423419	Impure	Pure	PCF
AGGATCTTCCAAGGGA-1	sample_01	3676	2003	0.0844487	0.425183	Impure	Pure	PCF
AGGATCTTCTCCAAGA-1	sample_01	6024	2984	0.259731	0.323698	Pure	Pure	multiplet
AGGCATTAGGAGACCT-1	sample_01	5010	2387	0.12684	0.382823	Impure	Pure	PCF
AGGCATTCAGAGCCCT-1	sample_01	839	635	0.0754103	0.249169	Impure	Pure	PCF
AGGCATTGTACGATCT-1	sample_01	2131	1166	0.108212	0.325931	Impure	Pure	PCF
AGGCATTGTCAAAGAT-1	sample_01	969	774	0.149359	0.264921	Impure	Pure	PCF
AGGCATTGTCACGACC-1	sample_01	1834	1098	0.346045	0.146369	Pure	Impure	BSF
AGGCATTGTTATAGAG-1	sample_01	4522	2308	0.0621923	0.447175	Impure	Pure	PCF
AGGCATTTCTGTTGGA-1	sample_01	2513	1253	0.449494	0.183067	Pure	Impure	BSF
AGGCCACAGCCTGAAG-1	sample_01	5383	2734	0.0839615	0.423812	Impure	Pure	PCF
AGGCCACAGGAGTACC-1	sample_01	5141	2673	0.110859	0.367879	Impure	Pure	PCF
AGGCCACCACCGTCTT-1	sample_01	2042	1227	0.281667	0.148458	Pure	Impure	BSF
AGGCCACCACGCCAGT-1	sample_01	5374	2508	0.10575	0.416577	Impure	Pure	PCF
AGGCCACCAGGCATGA-1	sample_01	666	505	0.114109	0.115524	Impure	Impure	impure
AGGCCACCATAGGTTC-1	sample_01	2669	1397	0.316994	0.19755	Pure	Impure	BSF
AGGCCACCATTGTCGA-1	sample_01	3782	2066	0.100071	0.361633	Impure	Pure	PCF
AGGCCACGTATCGGTT-1	sample_01	677	453	0.219462	0.125591	Impure	Impure	impure
AGGCCACGTTTCACTT-1	sample_01	3367	1814	0.104744	0.364413	Impure	Pure	PCF
AGGCCACTCAGCACCG-1	sample_01	5894	2679	0.0711987	0.389863	Impure	Pure	PCF
AGGCCACTCGCCTATC-1	sample_01	2116	1060	0.393218	0.203609	Pure	Impure	BSF
AGGCTGCAGAAACTGT-1	sample_01	3393	1885	0.0919231	0.371306	Impure	Pure	PCF
AGGCTGCAGAGCAGAA-1	sample_01	3571	1725	0.366955	0.224359	Pure	Impure	BSF
AGGCTGCAGAGCAGTC-1	sample_01	592	446	0.11575	0.110121	Impure	Impure	impure
AGGCTGCCACCTGTCT-1	sample_01	1731	976	0.372154	0.16581	Pure	Impure	BSF
AGGCTGCCACGGCCAT-1	sample_01	2335	1307	0.310878	0.192768	Pure	Impure	BSF
AGGCTGCGTGTTTACG-1	sample_01	1114	748	0.289763	0.199429	Pure	Impure	BSF
AGGCTGCTCGCCGTGA-1	sample_01	4219	2170	0.0820064	0.417833	Impure	Pure	PCF
AGGCTGCTCTCACTCG-1	sample_01	1827	1054	0.261756	0.154563	Pure	Impure	BSF
AGGGAGTAGGGAACAA-1	sample_01	1656	953	0.312019	0.195798	Pure	Impure	BSF
AGGGAGTCATGTTACG-1	sample_01	2632	1530	0.115192	0.304667	Impure	Pure	PCF
AGGGAGTGTTATGTGC-1	sample_01	4363	2288	0.0359359	0.37581	Impure	Pure	PCF
AGGGAGTGTTCTCAGA-1	sample_01	1320	832	0.29016	0.152704	Pure	Impure	BSF
AGGGAGTTCCGATAAC-1	sample_01	10230	4203	0.188981	0.452538	Impure	Pure	PCF
AGGGCCTAGACTTCAC-1	sample_01	2370	1482	0.109897	0.332585	Impure	Pure	PCF
AGGGCCTAGAGAGGGC-1	sample_01	4454	2240	0.114692	0.376925	Impure	Pure	PCF
AGGGCCTAGCAGTACG-1	sample_01	1834	1038	0.336923	0.164385	Pure	Impure	BSF
AGGGCCTAGGAGAATG-1	sample_01	1335	846	0.234788	0.156095	Pure	Impure	BSF
AGGGCCTAGGTCTGGA-1	sample_01	1076	678	0.197385	0.1115	Pure	Impure	BSF
AGGGCCTAGTAGCTCT-1	sample_01	2538	1377	0.317013	0.184883	Pure	Impure	BSF
AGGGCCTCACATACTG-1	sample_01	2768	1490	0.352949	0.174369	Pure	Impure	BSF
AGGGCCTCACTGTCCT-1	sample_01	2141	1028	0.261538	0.203385	Pure	Impure	BSF
AGGGCCTCATGGATCT-1	sample_01	2752	1481	0.390532	0.203464	Pure	Impure	BSF
AGGGCCTGTACCATAC-1	sample_01	1719	1037	0.295244	0.191165	Pure	Impure	BSF
AGGGCCTGTGCATCTA-1	sample_01	2593	1339	0.364782	0.169165	Pure	Impure	BSF
AGGGCCTGTTCAGCTA-1	sample_01	687	498	0.147769	0.119298	Impure	Impure	impure
AGGGCTCAGATTAGTG-1	sample_01	3491	2080	0.0941923	0.374798	Impure	Pure	PCF
AGGGCTCAGGCAGTCA-1	sample_01	3625	1853	0.353231	0.170363	Pure	Impure	BSF
AGGGCTCAGGCCCACT-1	sample_01	3311	1866	0.0789103	0.30773	Impure	Pure	PCF
AGGGCTCAGTATGCAA-1	sample_01	2584	1442	0.152769	0.379919	Impure	Pure	PCF
AGGGCTCCACACCAGC-1	sample_01	1204	743	0.201795	0.208147	Pure	Impure	BSF
AGGGCTCGTAGGTTTC-1	sample_01	3598	1840	0.168814	0.434762	Impure	Pure	PCF
AGGGCTCGTGTCATTG-1	sample_01	2830	1548	0.303712	0.177423	Pure	Impure	BSF
AGGGCTCGTTGGCCTG-1	sample_01	960	783	0.168981	0.143321	Pure	Impure	BSF
AGGGCTCTCATTTCGT-1	sample_01	3980	1919	0.105962	0.416492	Impure	Pure	PCF
AGGGCTCTCCGAGAAG-1	sample_01	5856	2893	0.123763	0.465214	Impure	Pure	PCF
AGGGCTCTCTCGTCGT-1	sample_01	1986	1162	0.338256	0.172165	Pure	Impure	BSF
AGGGTCCAGCTAGCCC-1	sample_01	3921	2025	0.111564	0.350911	Impure	Pure	PCF
AGGGTCCAGTAAGGGA-1	sample_01	3542	1953	0.335417	0.186409	Pure	Impure	BSF
AGGGTCCGTCCCGCAA-1	sample_01	3991	2374	0.190667	0.19923	Pure	Pure	multiplet
AGGGTCCTCAGATTGC-1	sample_01	3241	1776	0.101224	0.396494	Impure	Pure	PCF
AGGGTCCTCCTTACCG-1	sample_01	537	381	0.187231	0.122996	Impure	Impure	impure
AGGGTGACAGACCCGT-1	sample_01	2193	1160	0.235526	0.202776	Pure	Impure	BSF
AGGGTGACATCCCACT-1	sample_01	4277	2278	0.047359	0.362482	Impure	Pure	PCF
AGGGTGACATGACTAC-1	sample_01	4031	2135	0.184314	0.32702	Impure	Pure	PCF
AGGGTGAGTCAAACGG-1	sample_01	3327	1758	0.12925	0.393625	Impure	Pure	PCF
AGGGTGAGTTCACGAT-1	sample_01	2127	1175	0.350532	0.188768	Pure	Impure	BSF
AGGGTGATCGTTCATT-1	sample_01	3057	1677	0.123955	0.372879	Impure	Pure	PCF
AGGGTGATCTAGAACC-1	sample_01	2972	1567	0.116615	0.381192	Impure	Pure	PCF
AGGGTTTAGCGAGAAA-1	sample_01	558	441	0.161519	0.141879	Impure	Impure	impure
AGGGTTTAGGCACTAG-1	sample_01	3658	1849	0.33234	0.198607	Pure	Impure	BSF
AGGGTTTCATCACAGT-1	sample_01	3134	1790	0.0764872	0.329194	Impure	Pure	PCF
AGGGTTTTCGCCCAGA-1	sample_01	2211	1323	0.274019	0.190893	Pure	Impure	BSF
AGGGTTTTCGTTTACT-1	sample_01	2781	1319	0.411776	0.177115	Pure	Impure	BSF
AGGGTTTTCTGTAACG-1	sample_01	2968	1595	0.104942	0.371069	Impure	Pure	PCF
AGGTAGGAGACTTCGT-1	sample_01	2328	1565	0.240096	0.250722	Pure	Impure	BSF
AGGTAGGAGCATCTTG-1	sample_01	2906	1624	0.286821	0.177736	Pure	Impure	BSF
AGGTAGGCAGGGACTA-1	sample_01	855	310	0.0869359	0.136458	Impure	Impure	impure
AGGTAGGCATCACAGT-1	sample_01	2547	1444	0.0987949	0.3787	Impure	Pure	PCF
AGGTAGGCATGAGTAA-1	sample_01	2494	1491	0.358212	0.179284	Pure	Impure	BSF
AGGTAGGGTACCAGAG-1	sample_01	3632	2057	0.0428077	0.335288	Impure	Pure	PCF
AGGTAGGGTCACCGCA-1	sample_01	2766	1593	0.126122	0.341808	Impure	Pure	PCF
AGGTAGGGTGAGGATC-1	sample_01	2694	1561	0.278487	0.215163	Pure	Impure	BSF
AGGTAGGGTTCTCCCA-1	sample_01	2281	1363	0.335321	0.225853	Pure	Impure	BSF
AGGTCATAGATGTTCC-1	sample_01	1743	1027	0.328455	0.149442	Pure	Impure	BSF
AGGTCATCAGCACACC-1	sample_01	3496	1786	0.130519	0.408786	Impure	Pure	PCF
AGGTCATGTCCTGAAT-1	sample_01	3057	1895	0.0785385	0.37328	Impure	Pure	PCF
AGGTCATGTTTACTTC-1	sample_01	2810	1472	0.107923	0.417464	Impure	Pure	PCF
AGGTCATTCGATACTG-1	sample_01	2064	1133	0.28141	0.193012	Pure	Impure	BSF
AGGTCTAAGTTGTCGT-1	sample_01	2832	1492	0.122205	0.37354	Impure	Pure	PCF
AGGTCTACAGAGTCTT-1	sample_01	3770	2018	0.153686	0.286873	Impure	Pure	PCF
AGGTCTACATCACCAA-1	sample_01	873	626	0.204038	0.147345	Impure	Impure	impure
AGGTCTAGTATGGGAC-1	sample_01	3014	1435	0.365667	0.218008	Pure	Impure	BSF
AGGTCTAGTGTCCCTT-1	sample_01	2004	1168	0.357821	0.128337	Pure	Impure	BSF
AGGTCTAGTGTGTGGA-1	sample_01	3459	1865	0.0924615	0.420425	Impure	Pure	PCF
AGGTCTATCCATTGCC-1	sample_01	4135	2071	0.37334	0.154002	Pure	Impure	BSF
AGGTCTATCCCTCATG-1	sample_01	2268	1310	0.306288	0.18054	Pure	Impure	BSF
AGGTCTATCCTTCTAA-1	sample_01	4128	2106	0.0807756	0.359117	Impure	Pure	PCF
AGGTGTTAGATGGGCT-1	sample_01	4738	2233	0.0912115	0.360696	Impure	Pure	PCF
AGGTGTTAGATTAGCA-1	sample_01	3746	2097	0.169442	0.347292	Impure	Pure	PCF
AGGTGTTAGGGCCAAT-1	sample_01	1651	1148	0.124019	0.331421	Impure	Pure	PCF
AGGTGTTCAAATGGCG-1	sample_01	2389	1412	0.340045	0.174129	Pure	Impure	BSF
AGGTGTTCACAAGCCC-1	sample_01	4289	2243	0.0767692	0.399284	Impure	Pure	PCF
AGGTGTTCAGCTACCG-1	sample_01	3503	1861	0.145942	0.398851	Impure	Pure	PCF
AGGTGTTCATAGGTTC-1	sample_01	3739	1787	0.115776	0.407409	Impure	Pure	PCF
AGGTGTTCATTGAAGA-1	sample_01	1832	1129	0.102744	0.307185	Impure	Pure	PCF
AGGTGTTGTCCGCAGT-1	sample_01	2813	1495	0.326859	0.142653	Pure	Impure	BSF
AGGTGTTGTGCCTATA-1	sample_01	3086	1634	0.130788	0.372054	Impure	Pure	PCF
AGGTGTTTCGTGCATA-1	sample_01	1664	1214	0.151897	0.333917	Impure	Pure	PCF
AGGTGTTTCTTACTGT-1	sample_01	3138	1750	0.110256	0.381665	Impure	Pure	PCF
AGGTTACAGAGAGGTA-1	sample_01	5162	2800	0.231571	0.375349	Pure	Pure	multiplet
AGGTTACAGAGTCTGG-1	sample_01	2765	1496	0.350994	0.163593	Pure	Impure	BSF
AGGTTACAGCAACAAT-1	sample_01	2054	1288	0.381622	0.181921	Pure	Impure	BSF
AGGTTACAGTCCCAAT-1	sample_01	1459	908	0.247609	0.131546	Pure	Impure	BSF
AGGTTACCAAACGTGG-1	sample_01	4218	2259	0.0488077	0.381379	Impure	Pure	PCF
AGGTTACCAGTAGAGC-1	sample_01	2853	1496	0.126801	0.420105	Impure	Pure	PCF
AGGTTACCAGTGGCTC-1	sample_01	3328	1621	0.317558	0.193734	Pure	Impure	BSF
AGGTTACCATGCTGCG-1	sample_01	1747	1067	0.361782	0.192643	Pure	Impure	BSF
AGGTTACGTCGATTTG-1	sample_01	967	600	0.279981	0.115173	Pure	Impure	BSF
AGGTTACTCCAATGCA-1	sample_01	2279	1340	0.299641	0.234464	Pure	Impure	BSF
AGGTTACTCGGAAGGT-1	sample_01	1644	946	0.242833	0.1683	Pure	Impure	BSF
AGGTTGTAGCATACTC-1	sample_01	2679	1455	0.102974	0.392782	Impure	Pure	PCF
AGGTTGTCAATACAGA-1	sample_01	3425	1797	0.171404	0.395038	Impure	Pure	PCF
AGGTTGTCATCGGCCA-1	sample_01	1694	975	0.274077	0.175331	Pure	Impure	BSF
AGGTTGTCATGTGGCC-1	sample_01	4414	2162	0.0991474	0.333052	Impure	Pure	PCF
AGGTTGTGTCCCACGA-1	sample_01	2373	1396	0.0756474	0.383004	Impure	Pure	PCF
AGGTTGTGTCGAGCTC-1	sample_01	1656	832	0.20175	0.165919	Pure	Impure	BSF
AGGTTGTGTTATCTTC-1	sample_01	3399	1822	0.313872	0.157853	Pure	Impure	BSF
AGGTTGTTCGGCTGTG-1	sample_01	2857	1536	0.392853	0.178756	Pure	Impure	BSF
AGGTTGTTCGTTGCCT-1	sample_01	4009	1903	0.107173	0.371847	Impure	Pure	PCF
AGTAACCAGCAGAAAG-1	sample_01	2139	1402	0.271487	0.195942	Pure	Impure	BSF
AGTAACCGTTCAGTAC-1	sample_01	2790	1552	0.128994	0.340446	Impure	Pure	PCF
AGTAACCTCAGTCCGG-1	sample_01	2295	1305	0.303974	0.160071	Pure	Impure	BSF
AGTAACCTCGGAACTT-1	sample_01	4987	2355	0.113378	0.394032	Impure	Pure	PCF
AGTAACCTCGGAGTGA-1	sample_01	826	603	0.284859	0.119889	Pure	Impure	BSF
AGTAACCTCGTGTTCC-1	sample_01	2187	1254	0.264936	0.20249	Pure	Impure	BSF
AGTACCAAGATCCAAA-1	sample_01	4212	2232	0.113391	0.344333	Impure	Pure	PCF
AGTACCAAGCAGGCAT-1	sample_01	547	393	0.186103	0.102738	Impure	Impure	impure
AGTACCAAGCATACTC-1	sample_01	2530	1311	0.282994	0.163361	Pure	Impure	BSF
AGTACCACAGGCACAA-1	sample_01	1903	1001	0.164	0.380044	Impure	Pure	PCF
AGTACCACATCAGCGC-1	sample_01	1334	898	0.237654	0.159927	Pure	Impure	BSF
AGTACCAGTTCAAGTC-1	sample_01	3355	1719	0.303244	0.187931	Pure	Impure	BSF
AGTACCATCCGCATAA-1	sample_01	3514	1962	0.115538	0.327938	Impure	Pure	PCF
AGTACTGAGGAGCAAA-1	sample_01	1875	1346	0.0988077	0.372058	Impure	Pure	PCF
AGTACTGAGGTTGAGC-1	sample_01	4127	2111	0.125282	0.369756	Impure	Pure	PCF
AGTACTGAGTTTGCTG-1	sample_01	2748	1419	0.348673	0.174405	Pure	Impure	BSF
AGTACTGCATAGAAAC-1	sample_01	1814	1107	0.0711026	0.351004	Impure	Pure	PCF
AGTACTGGTATGCGTT-1	sample_01	8104	3308	0.0999231	0.456492	Impure	Pure	PCF
AGTACTGTCACTACGA-1	sample_01	3173	1668	0.291596	0.151179	Pure	Impure	BSF
AGTACTGTCACTTATC-1	sample_01	3725	2024	0.0696474	0.354232	Impure	Pure	PCF
AGTACTGTCCAACCGG-1	sample_01	996	582	0.285378	0.130643	Pure	Impure	BSF
AGTACTGTCCATGAGT-1	sample_01	4398	2278	0.0615641	0.312179	Impure	Pure	PCF
AGTAGCTAGAGATTCA-1	sample_01	1538	912	0.298878	0.152655	Pure	Impure	BSF
AGTAGCTAGATCGCCC-1	sample_01	3394	1946	0.0657564	0.350813	Impure	Pure	PCF
AGTAGCTAGGTGCTGA-1	sample_01	5401	2498	0.0782756	0.409091	Impure	Pure	PCF
AGTAGCTCAAGTTGGG-1	sample_01	3250	1839	0.0662756	0.338597	Impure	Pure	PCF
AGTAGCTCAGCATACT-1	sample_01	2368	1279	0.418686	0.165675	Pure	Impure	BSF
AGTAGCTGTAACACGG-1	sample_01	4007	2028	0.0729231	0.335595	Impure	Pure	PCF
AGTAGCTGTACGGATG-1	sample_01	4579	2205	0.106981	0.41703	Impure	Pure	PCF
AGTAGCTGTCTCCCTA-1	sample_01	2721	1540	0.320891	0.187101	Pure	Impure	BSF
AGTAGCTGTTCCGTTC-1	sample_01	4460	2085	0.0865769	0.39749	Impure	Pure	PCF
AGTAGCTTCGGCCAAC-1	sample_01	2027	1099	0.384308	0.171167	Pure	Impure	BSF
AGTAGTCAGAGGTCGT-1	sample_01	3133	1853	0.107109	0.425879	Impure	Pure	PCF
AGTAGTCAGCATATGA-1	sample_01	2359	1221	0.289968	0.202464	Pure	Impure	BSF
AGTAGTCGTATACCCA-1	sample_01	529	411	0.0984103	0.136302	Impure	Impure	impure
AGTAGTCGTGGATCAG-1	sample_01	2058	1242	0.117288	0.343976	Impure	Pure	PCF
AGTAGTCGTTCAAACC-1	sample_01	3169	1577	0.0981538	0.378653	Impure	Pure	PCF
AGTAGTCGTTCTCTAT-1	sample_01	4631	2225	0.0934167	0.386232	Impure	Pure	PCF
AGTAGTCTCGGACAAG-1	sample_01	3280	1647	0.0704231	0.360734	Impure	Pure	PCF
AGTAGTCTCGTCTACC-1	sample_01	520	407	0.134288	0.127484	Impure	Impure	impure
AGTAGTCTCTTAGGAC-1	sample_01	3443	1955	0.127987	0.324262	Impure	Pure	PCF
AGTCAACAGCCTCAAT-1	sample_01	4104	2278	0.300519	0.141373	Pure	Impure	BSF
AGTCAACCAAGTTCGT-1	sample_01	2280	1226	0.141038	0.347298	Impure	Pure	PCF
AGTCAACGTAGGACTG-1	sample_01	1456	990	0.0985769	0.330802	Impure	Pure	PCF
AGTCAACTCACTACGA-1	sample_01	2122	1141	0.332788	0.214887	Pure	Impure	BSF
AGTCAACTCCCAATAG-1	sample_01	3024	1690	0.297071	0.157409	Pure	Impure	BSF
AGTCACAAGACTCTTG-1	sample_01	5930	2923	0.102474	0.402407	Impure	Pure	PCF
AGTCACAAGGGAGGAC-1	sample_01	3850	2050	0.0795897	0.388849	Impure	Pure	PCF
AGTCACAAGTCAGCGA-1	sample_01	2224	1213	0.117333	0.363313	Impure	Pure	PCF
AGTCACACAATAGGGC-1	sample_01	2317	1341	0.28909	0.190339	Pure	Impure	BSF
AGTCACACACCAAAGG-1	sample_01	7006	3140	0.0998974	0.458744	Impure	Pure	PCF
AGTCACACACCGTGAC-1	sample_01	2817	1565	0.156147	0.323812	Impure	Pure	PCF
AGTCACACACTGTTCC-1	sample_01	751	214	0.177756	0.111188	Impure	Impure	impure
AGTCACAGTCGAGTTT-1	sample_01	4753	2303	0.126987	0.339355	Impure	Pure	PCF
AGTCACAGTTCAGTAC-1	sample_01	1894	1014	0.266679	0.153024	Pure	Impure	BSF
AGTCACATCAAGCCGC-1	sample_01	4196	2064	0.0663077	0.344292	Impure	Pure	PCF
AGTCACATCCAGTGCG-1	sample_01	555	433	0.173013	0.117143	Impure	Impure	impure
AGTCACATCGTTCCTG-1	sample_01	1685	1038	0.297628	0.17444	Pure	Impure	BSF
AGTCACATCTCGACGG-1	sample_01	5542	2606	0.127769	0.440397	Impure	Pure	PCF
AGTCACATCTGAGAAA-1	sample_01	1918	1194	0.102609	0.340696	Impure	Pure	PCF
AGTCATGAGGTGATCG-1	sample_01	4120	2161	0.0986923	0.353552	Impure	Pure	PCF
AGTCATGAGTGACACG-1	sample_01	508	389	0.135109	0.118552	Impure	Impure	impure
AGTCATGGTCGTTGCG-1	sample_01	1656	821	0.261301	0.179014	Pure	Impure	BSF
AGTCATGGTGTTCAGT-1	sample_01	4401	2109	0.0982051	0.355397	Impure	Pure	PCF
AGTCATGTCCGCGATG-1	sample_01	5561	2721	0.158282	0.384264	Impure	Pure	PCF
AGTCATGTCGACCATA-1	sample_01	2381	1194	0.272103	0.161623	Pure	Impure	BSF
AGTCATGTCGGCATAT-1	sample_01	1072	605	0.122404	0.131421	Pure	Impure	BSF
AGTCTCCAGGGTCAAC-1	sample_01	4360	2256	0.0857436	0.385766	Impure	Pure	PCF
AGTCTCCCACCAACAT-1	sample_01	4483	2306	0.042	0.409833	Impure	Pure	PCF
AGTCTCCCAGCTCTGG-1	sample_01	2055	1165	0.361878	0.155593	Pure	Impure	BSF
AGTCTCCCAGGAGGAG-1	sample_01	1679	982	0.316256	0.158026	Pure	Impure	BSF
AGTCTCCCATCATTGG-1	sample_01	4144	2240	0.051641	0.410466	Impure	Pure	PCF
AGTCTCCGTCTCAGAT-1	sample_01	511	386	0.167846	0.106718	Impure	Impure	impure
AGTCTCCTCACCTCGT-1	sample_01	511	366	0.218718	0.112958	Impure	Impure	impure
AGTCTCCTCGTGTGAT-1	sample_01	611	459	0.24591	0.119815	Impure	Impure	impure
AGTCTCCTCTCCTACG-1	sample_01	3327	1735	0.0741859	0.381373	Impure	Pure	PCF
AGTGACTAGCCATTGT-1	sample_01	4841	2475	0.0762115	0.367667	Impure	Pure	PCF
AGTGACTAGCGTATGG-1	sample_01	4478	2322	0.0831538	0.391873	Impure	Pure	PCF
AGTGACTCAGCTACAT-1	sample_01	2721	1687	0.108917	0.336627	Impure	Pure	PCF
AGTGACTCAGTTGGTT-1	sample_01	2842	1568	0.140872	0.425895	Impure	Pure	PCF
AGTGACTGTACGCGTC-1	sample_01	2129	1349	0.334891	0.170996	Pure	Impure	BSF
AGTGACTGTCAGGCAA-1	sample_01	4268	2270	0.0764103	0.368502	Impure	Pure	PCF
AGTGACTTCATTCGGA-1	sample_01	1802	960	0.299494	0.17749	Pure	Impure	BSF
AGTGACTTCTCGCAGG-1	sample_01	3214	1685	0.114365	0.376692	Impure	Pure	PCF
AGTGATCAGGATACGC-1	sample_01	1280	818	0.252173	0.16795	Pure	Impure	BSF
AGTGATCAGGGCAGGA-1	sample_01	4852	2433	0.0971667	0.419113	Impure	Pure	PCF
AGTGATCAGTCAACAA-1	sample_01	4035	2107	0.0658974	0.39294	Impure	Pure	PCF
AGTGATCCAAAGTATG-1	sample_01	2777	1699	0.136647	0.362571	Impure	Pure	PCF
AGTGATCGTCAATGGG-1	sample_01	1445	836	0.220782	0.15831	Pure	Impure	BSF
AGTGATCTCCTTCGAC-1	sample_01	2164	1199	0.288718	0.196341	Pure	Impure	BSF
AGTGATCTCTATCGCC-1	sample_01	4016	2093	0.288103	0.141484	Pure	Impure	BSF
AGTGATCTCTGTGCGG-1	sample_01	2099	1134	0.337923	0.183014	Pure	Impure	BSF
AGTGCCGAGAAGTCCG-1	sample_01	535	396	0.0991474	0.10652	Impure	Impure	impure
AGTGCCGAGTAGGATT-1	sample_01	570	429	0.135474	0.122123	Impure	Impure	impure
AGTGCCGCAACGGCTC-1	sample_01	3654	1943	0.124423	0.379258	Impure	Pure	PCF
AGTGCCGCAATCCAGT-1	sample_01	504	382	0.168462	0.0974206	Impure	Impure	impure
AGTGCCGCACACAGCC-1	sample_01	4492	2334	0.114449	0.366024	Impure	Pure	PCF
AGTGCCGCACGCGTCA-1	sample_01	3999	2124	0.148353	0.325877	Impure	Pure	PCF
AGTGCCGGTAGTACGG-1	sample_01	4259	2295	0.193647	0.349688	Impure	Pure	PCF
AGTGCCGGTATGTCTG-1	sample_01	3232	1614	0.325974	0.187776	Pure	Impure	BSF
AGTGCCGGTGAATATG-1	sample_01	2286	1221	0.0918141	0.403911	Impure	Pure	PCF
AGTGCCGGTTTGGAAA-1	sample_01	2225	1124	0.368872	0.178204	Pure	Impure	BSF
AGTGCCGGTTTGTTGG-1	sample_01	3462	1818	0.375269	0.1512	Pure	Impure	BSF
AGTGCCGTCGATTGGT-1	sample_01	1265	791	0.237647	0.15526	Pure	Impure	BSF
AGTGCCGTCGTGCATA-1	sample_01	2706	1745	0.125628	0.346607	Impure	Pure	PCF
AGTGCCGTCTCGCGTT-1	sample_01	3337	1704	0.0844423	0.361976	Impure	Pure	PCF
AGTGTTGAGACGAGCT-1	sample_01	3821	1916	0.212897	0.362508	Impure	Pure	PCF
AGTGTTGAGCACTCGC-1	sample_01	1408	937	0.286782	0.157948	Pure	Impure	BSF
AGTGTTGAGGTCGTAG-1	sample_01	1499	961	0.264801	0.161679	Pure	Impure	BSF
AGTGTTGAGTCTTCCC-1	sample_01	3668	2069	0.140923	0.310647	Impure	Pure	PCF
AGTGTTGCAATAGGGC-1	sample_01	4807	2332	0.0423718	0.429081	Impure	Pure	PCF
AGTGTTGCACACACGC-1	sample_01	3531	1826	0.136179	0.359792	Impure	Pure	PCF
AGTGTTGCATGGACAG-1	sample_01	2197	1199	0.295237	0.164079	Pure	Impure	BSF
AGTGTTGCATTCACAG-1	sample_01	1592	961	0.283179	0.179629	Pure	Impure	BSF
AGTGTTGGTTGGATCT-1	sample_01	613	460	0.144641	0.112651	Impure	Impure	impure
AGTGTTGTCAACTGGT-1	sample_01	2558	1318	0.0620321	0.350865	Impure	Pure	PCF
AGTGTTGTCCCATTTA-1	sample_01	3681	2012	0.0936346	0.359597	Impure	Pure	PCF
AGTGTTGTCCGTGTAA-1	sample_01	5968	2778	0.140647	0.402825	Impure	Pure	PCF
AGTGTTGTCCTATTGT-1	sample_01	5316	2572	0.123038	0.370343	Impure	Pure	PCF
AGTGTTGTCGGACGTC-1	sample_01	2971	1497	0.299282	0.164159	Pure	Impure	BSF
AGTGTTGTCTCTGACC-1	sample_01	4200	2073	0.110397	0.364452	Impure	Pure	PCF
AGTTAGCAGAGGGTGG-1	sample_01	2543	1418	0.287359	0.199714	Pure	Impure	BSF
AGTTAGCAGCATGAAT-1	sample_01	3086	1777	0.121872	0.331772	Impure	Pure	PCF
AGTTAGCCAAAGGATT-1	sample_01	2049	1321	0.297551	0.154472	Pure	Impure	BSF
AGTTAGCCAACCGGAA-1	sample_01	7501	3487	0.130385	0.457911	Impure	Pure	PCF
AGTTAGCCAACTAGAA-1	sample_01	2330	1382	0.17525	0.367242	Impure	Pure	PCF
AGTTAGCCAAGTGGCA-1	sample_01	560	439	0.173064	0.0814603	Impure	Impure	impure
AGTTAGCCACAAGTTC-1	sample_01	2802	1668	0.0506731	0.384026	Impure	Pure	PCF
AGTTAGCCAGACCAAG-1	sample_01	3963	2095	0.143026	0.369474	Impure	Pure	PCF
AGTTAGCCATGCAGGA-1	sample_01	5292	2619	0.0774359	0.410867	Impure	Pure	PCF
AGTTAGCGTAGATTGA-1	sample_01	2674	1500	0.294859	0.179288	Pure	Impure	BSF
AGTTAGCGTCAACGCC-1	sample_01	7540	3256	0.112468	0.492089	Impure	Pure	PCF
AGTTAGCGTTATGTGC-1	sample_01	3630	1947	0.137833	0.398413	Impure	Pure	PCF
AGTTAGCGTTGCATAC-1	sample_01	1584	1132	0.102282	0.338774	Impure	Pure	PCF
AGTTAGCGTTTACTGG-1	sample_01	2799	1432	0.111756	0.369839	Impure	Pure	PCF
AGTTAGCTCAGCGGAA-1	sample_01	2848	1534	0.343788	0.184615	Pure	Impure	BSF
AGTTAGCTCATTGCCC-1	sample_01	2598	1576	0.0815321	0.385129	Impure	Pure	PCF
AGTTAGCTCCACACAA-1	sample_01	5601	2740	0.138686	0.391677	Impure	Pure	PCF
AGTTAGCTCGTAGCCG-1	sample_01	3511	1938	0.307699	0.182155	Pure	Impure	BSF
AGTTAGCTCTAACGGT-1	sample_01	3213	1814	0.0907436	0.381577	Impure	Pure	PCF
AGTTCCCAGAGGATCC-1	sample_01	5965	2863	0.0785321	0.455272	Impure	Pure	PCF
AGTTCCCAGGTGCGAT-1	sample_01	2886	1636	0.385321	0.202393	Pure	Impure	BSF
AGTTCCCCAAGATCCT-1	sample_01	4586	2330	0.0867436	0.413893	Impure	Pure	PCF
AGTTCCCCACGTTGGC-1	sample_01	4124	2200	0.0704038	0.337153	Impure	Pure	PCF
AGTTCCCCAGTATTCG-1	sample_01	3035	1825	0.0878141	0.344716	Impure	Pure	PCF
AGTTCCCGTCTGCAAT-1	sample_01	4087	2049	0.0895641	0.375367	Impure	Pure	PCF
AGTTCCCTCATCCTAT-1	sample_01	1760	996	0.370654	0.151911	Pure	Impure	BSF
AGTTCGACAACAAAGT-1	sample_01	4918	2619	0.0582436	0.398052	Impure	Pure	PCF
AGTTCGACAGTCCCGA-1	sample_01	3101	1786	0.119288	0.363938	Impure	Pure	PCF
AGTTCGACATAATCGC-1	sample_01	3052	1588	0.287782	0.16094	Pure	Impure	BSF
AGTTCGACATAGATGA-1	sample_01	3653	2066	0.225526	0.314187	Impure	Pure	PCF
AGTTCGAGTGCAATAA-1	sample_01	2606	1441	0.13825	0.351984	Impure	Pure	PCF
AGTTCGAGTTGCTTGA-1	sample_01	2794	1411	0.331878	0.188325	Pure	Impure	BSF
AGTTCGATCATTACGG-1	sample_01	3413	1692	0.0827436	0.387321	Impure	Pure	PCF
AGTTCGATCCAGTGCG-1	sample_01	1687	1124	0.285821	0.125411	Pure	Impure	BSF
AGTTCGATCTATTGTC-1	sample_01	2749	1463	0.116955	0.39955	Impure	Pure	PCF
ATACCGAAGGACCCAA-1	sample_01	3203	1911	0.0955705	0.361621	Impure	Pure	PCF
ATACCGACAGACCTGC-1	sample_01	4243	2064	0.1025	0.389673	Impure	Pure	PCF
ATACCGACATAGAAAC-1	sample_01	2458	1496	0.389942	0.178663	Pure	Impure	BSF
ATACCGAGTAATGATG-1	sample_01	2250	1344	0.248462	0.185853	Pure	Impure	BSF
ATACCGAGTAGCCAGA-1	sample_01	5739	2757	0.0679359	0.450317	Impure	Pure	PCF
ATACCGAGTCGGCTAC-1	sample_01	4055	2020	0.107372	0.412518	Impure	Pure	PCF
ATACCGATCACCTACC-1	sample_01	1633	973	0.334654	0.186133	Pure	Impure	BSF
ATACCGATCCATAGGT-1	sample_01	3428	1794	0.106788	0.368651	Impure	Pure	PCF
ATACCGATCTGGAGAG-1	sample_01	2687	1418	0.141404	0.342067	Impure	Pure	PCF
ATACCTTAGACAACAT-1	sample_01	2430	1378	0.076859	0.360472	Impure	Pure	PCF
ATACCTTAGAGGTTTA-1	sample_01	9077	3718	0.305628	0.426383	Impure	Pure	PCF
ATACCTTAGCAGCAGT-1	sample_01	1936	1266	0.279622	0.1613	Pure	Impure	BSF
ATACCTTAGCATATGA-1	sample_01	2479	1326	0.327359	0.169579	Pure	Impure	BSF
ATACCTTAGTCAGAGC-1	sample_01	1558	924	0.33309	0.17054	Pure	Impure	BSF
ATACCTTAGTCATGAA-1	sample_01	2996	1649	0.106212	0.37344	Impure	Pure	PCF
ATACCTTCAAACCACT-1	sample_01	4889	2435	0.144923	0.319006	Impure	Pure	PCF
ATACCTTCACGACGTC-1	sample_01	3223	1692	0.374878	0.186988	Pure	Impure	BSF
ATACCTTCATATTCGG-1	sample_01	4875	2509	0.0761987	0.366794	Impure	Pure	PCF
ATACCTTCATCCTCAC-1	sample_01	3093	1623	0.357199	0.198208	Pure	Impure	BSF
ATACCTTGTAGGCTGA-1	sample_01	2765	1738	0.126994	0.356208	Impure	Pure	PCF
ATACCTTGTCAGACTT-1	sample_01	2659	1426	0.130077	0.408659	Impure	Pure	PCF
ATACCTTGTGCTCGTG-1	sample_01	3207	1617	0.164103	0.369605	Impure	Pure	PCF
ATACCTTGTGTACAGG-1	sample_01	2842	1486	0.274128	0.188119	Pure	Impure	BSF
ATACCTTGTTTGAAAG-1	sample_01	504	329	0.175173	0.102738	Impure	Impure	impure
ATACTTCAGACAAGCC-1	sample_01	539	399	0.134417	0.101292	Impure	Impure	impure
ATACTTCAGATAACGT-1	sample_01	708	562	0.130609	0.147058	Impure	Impure	impure
ATACTTCAGCGACTTT-1	sample_01	2446	1378	0.298301	0.181155	Pure	Impure	BSF
ATACTTCAGTAAATGC-1	sample_01	1279	844	0.269737	0.171188	Pure	Impure	BSF
ATACTTCCATATGGCT-1	sample_01	3250	1867	0.122917	0.399425	Impure	Pure	PCF
ATACTTCGTCCGAAAG-1	sample_01	549	420	0.198532	0.116071	Impure	Impure	impure
ATACTTCGTGCCGTAC-1	sample_01	3808	2021	0.0756859	0.399004	Impure	Pure	PCF
ATACTTCGTGCGGTAA-1	sample_01	3753	1944	0.117609	0.34853	Impure	Pure	PCF
ATACTTCGTGTTACAC-1	sample_01	4052	2210	0.124583	0.291966	Impure	Pure	PCF
ATACTTCGTTACCCAA-1	sample_01	2777	1583	0.0665641	0.333827	Impure	Pure	PCF
ATACTTCTCGAAGTGG-1	sample_01	2059	1149	0.341006	0.192712	Pure	Impure	BSF
ATAGACCAGAAGGCTC-1	sample_01	2424	1310	0.387186	0.153802	Pure	Impure	BSF
ATAGACCAGGGAGGTG-1	sample_01	1775	1032	0.324346	0.188538	Pure	Impure	BSF
ATAGACCAGTAGACCG-1	sample_01	3519	1670	0.33225	0.186649	Pure	Pure	multiplet
ATAGACCAGTGAACAT-1	sample_01	2999	1557	0.273859	0.221532	Pure	Pure	multiplet
ATAGACCCAACGACTT-1	sample_01	1186	908	0.23825	0.157143	Pure	Impure	BSF
ATAGACCGTGATTGGG-1	sample_01	2635	1350	0.36584	0.160792	Pure	Impure	BSF
ATAGACCTCAAGAATG-1	sample_01	1488	1022	0.102532	0.324583	Impure	Pure	PCF
ATAGACCTCACCTGGG-1	sample_01	3533	1998	0.0767821	0.409163	Impure	Pure	PCF
ATAGACCTCCGGACTG-1	sample_01	4303	2088	0.102981	0.369272	Impure	Pure	PCF
ATAGACCTCTTTCCAA-1	sample_01	8544	3452	0.127737	0.472518	Impure	Pure	PCF
ATAGAGAAGACAACAT-1	sample_01	1171	833	0.283436	0.167091	Pure	Impure	BSF
ATAGAGACAAATCGGG-1	sample_01	2840	1459	0.260359	0.190698	Pure	Impure	BSF
ATAGAGACAACTGATC-1	sample_01	3595	1941	0.127449	0.41354	Impure	Pure	PCF
ATAGAGACAAGACAAT-1	sample_01	2171	1297	0.250968	0.204563	Pure	Impure	BSF
ATAGAGACACATTCGA-1	sample_01	1084	280	0.0340192	0.191516	Impure	Impure	impure
ATAGAGAGTATCGCGC-1	sample_01	3785	2063	0.118256	0.345746	Impure	Pure	PCF
ATAGAGAGTCTAGGCC-1	sample_01	4095	2202	0.0830385	0.366004	Impure	Pure	PCF
ATAGAGATCAGATGCT-1	sample_01	2888	1616	0.32666	0.262645	Pure	Impure	BSF
ATAGAGATCATGCGGC-1	sample_01	5020	2386	0.150891	0.382732	Impure	Pure	PCF
ATAGAGATCCGACAGC-1	sample_01	1881	1020	0.255949	0.199169	Pure	Impure	BSF
ATAGGCTAGCGTTACT-1	sample_01	4412	2195	0.0641346	0.391522	Impure	Pure	PCF
ATAGGCTAGGCGACAT-1	sample_01	4795	2365	0.0598205	0.323151	Impure	Pure	PCF
ATAGGCTAGTCTGCGC-1	sample_01	598	510	0.114301	0.133544	Impure	Impure	impure
ATAGGCTAGTCTGGAG-1	sample_01	3381	1796	0.0603462	0.4062	Impure	Pure	PCF
ATAGGCTGTAGTACGG-1	sample_01	3983	2108	0.0875128	0.372123	Impure	Pure	PCF
ATAGGCTGTTGACTAC-1	sample_01	1479	899	0.287417	0.138437	Pure	Impure	BSF
ATAGGCTTCGAATGCT-1	sample_01	3283	1810	0.300141	0.163387	Pure	Impure	BSF
ATATCCTAGATACAGT-1	sample_01	3811	1894	0.419128	0.183655	Pure	Impure	BSF
ATATCCTCAAGTCGTT-1	sample_01	1558	1005	0.267173	0.178504	Pure	Impure	BSF
ATATCCTCAGGCCTGT-1	sample_01	2421	1350	0.316865	0.139125	Pure	Impure	BSF
ATATCCTCATCACCAA-1	sample_01	3464	1885	0.323987	0.191121	Pure	Impure	BSF
ATATCCTCATCGGAAG-1	sample_01	867	569	0.18684	0.164403	Pure	Impure	BSF
ATATCCTTCCTGCCAT-1	sample_01	3520	1804	0.154821	0.359153	Impure	Pure	PCF
ATCACAGAGACCATTC-1	sample_01	2934	1666	0.305923	0.175536	Pure	Impure	BSF
ATCACAGAGATTGACA-1	sample_01	2191	1339	0.141962	0.361518	Impure	Pure	PCF
ATCACAGAGTACCATC-1	sample_01	5552	2663	0.126038	0.442857	Impure	Pure	PCF
ATCACAGAGTCCGCGT-1	sample_01	2298	1362	0.288936	0.164377	Pure	Impure	BSF
ATCACAGCAGCCCAGT-1	sample_01	3528	1823	0.287981	0.145708	Pure	Impure	BSF
ATCACAGGTCGAAACG-1	sample_01	2167	1297	0.276897	0.159591	Pure	Impure	BSF
ATCACAGGTCGCCTAG-1	sample_01	5077	2567	0.115263	0.361534	Impure	Pure	PCF
ATCACAGGTGTTCCTC-1	sample_01	2302	1314	0.316532	0.199754	Pure	Impure	BSF
ATCACAGGTTCGTAAC-1	sample_01	565	407	0.166038	0.121157	Impure	Impure	impure
ATCACAGTCACAGTGT-1	sample_01	2826	1477	0.394692	0.192266	Pure	Impure	BSF
ATCACAGTCAGAGTGG-1	sample_01	5004	2458	0.150615	0.376401	Impure	Pure	PCF
ATCACAGTCCTCTAAT-1	sample_01	5670	2534	0.0455705	0.425776	Impure	Pure	PCF
ATCACAGTCGCTGTTC-1	sample_01	3223	1595	0.0975962	0.39652	Impure	Pure	PCF
ATCACAGTCTCTAGGA-1	sample_01	3845	1996	0.10509	0.404208	Impure	Pure	PCF
ATCACGACAAACTAGA-1	sample_01	6602	2978	0.107603	0.464345	Impure	Pure	PCF
ATCACGACAAGACGAC-1	sample_01	2033	1086	0.322397	0.182437	Pure	Impure	BSF
ATCACGACAATGTCAC-1	sample_01	4560	2178	0.0493397	0.378062	Impure	Pure	PCF
ATCACGACATATACCG-1	sample_01	1498	853	0.283763	0.157381	Pure	Impure	BSF
ATCACGACATGTGTCA-1	sample_01	3179	1666	0.148314	0.427935	Impure	Pure	PCF
ATCACGAGTACCAATC-1	sample_01	3537	1858	0.076641	0.359706	Impure	Pure	PCF
ATCACGAGTCAGACGA-1	sample_01	1957	1094	0.293385	0.195155	Pure	Impure	BSF
ATCACGAGTTCTCCTG-1	sample_01	5753	2642	0.0963077	0.413667	Impure	Pure	PCF
ATCACGATCAAGTGTC-1	sample_01	2115	1342	0.314564	0.155619	Pure	Impure	BSF
ATCACGATCCAAGCAT-1	sample_01	2716	1400	0.360744	0.206639	Pure	Impure	BSF
ATCACTTAGCAATTAG-1	sample_01	2102	1238	0.345647	0.201827	Pure	Impure	BSF
ATCACTTAGCTGAGTG-1	sample_01	3676	2111	0.120096	0.366659	Impure	Pure	PCF
ATCACTTAGTCTCCTC-1	sample_01	2515	1350	0.340064	0.207861	Pure	Impure	BSF
ATCACTTGTAAGCAAT-1	sample_01	3418	1944	0.0965	0.299407	Impure	Pure	PCF
ATCACTTGTAGGGTAC-1	sample_01	3156	1465	0.3285	0.203843	Pure	Impure	BSF
ATCACTTGTGGCTGAA-1	sample_01	574	429	0.153359	0.111171	Impure	Impure	impure
ATCACTTGTGTGATGG-1	sample_01	3133	1553	0.314397	0.202611	Pure	Impure	BSF
ATCACTTTCAACCCGG-1	sample_01	4526	2142	0.319532	0.213349	Pure	Impure	BSF
ATCACTTTCATTGTGG-1	sample_01	2600	1311	0.121449	0.372196	Impure	Pure	PCF
ATCACTTTCCGTTTCG-1	sample_01	2508	1350	0.270878	0.168885	Pure	Impure	BSF
ATCACTTTCTGGGCGT-1	sample_01	2105	1225	0.101122	0.355046	Impure	Pure	PCF
ATCAGGTAGCAGGCTA-1	sample_01	794	596	0.207263	0.161522	Pure	Impure	BSF
ATCAGGTAGGCACCAA-1	sample_01	3131	1838	0.116962	0.369692	Impure	Pure	PCF
ATCAGGTAGGTTTGAA-1	sample_01	2539	1403	0.321083	0.177883	Pure	Impure	BSF
ATCAGGTAGTAGTGCG-1	sample_01	3040	1778	0.159071	0.36523	Impure	Pure	PCF
ATCAGGTCAATTCGTG-1	sample_01	2938	1529	0.126256	0.36419	Impure	Pure	PCF
ATCAGGTCACAGTGAG-1	sample_01	2423	1297	0.151692	0.379149	Impure	Pure	PCF
ATCAGGTCACCAACAT-1	sample_01	509	398	0.15309	0.112242	Impure	Impure	impure
ATCAGGTCAGGCAATG-1	sample_01	5902	2671	0.0762692	0.401671	Impure	Pure	PCF
ATCAGGTCATACAGCT-1	sample_01	2959	1452	0.334442	0.188845	Pure	Impure	BSF
ATCAGGTGTAGAATAC-1	sample_01	2911	1544	0.332981	0.186859	Pure	Impure	BSF
ATCAGGTGTCGACGCT-1	sample_01	3482	1923	0.0824936	0.331216	Impure	Pure	PCF
ATCAGGTGTGTATTGC-1	sample_01	4730	2246	0.0906859	0.389667	Impure	Pure	PCF
ATCAGGTGTTGCTGAT-1	sample_01	1808	1205	0.120083	0.339276	Impure	Pure	PCF
ATCAGGTTCAACACCA-1	sample_01	1643	992	0.216064	0.183395	Pure	Impure	BSF
ATCAGGTTCCTTTAGT-1	sample_01	4306	2153	0.105769	0.367669	Impure	Pure	PCF
ATCAGGTTCGCCACTT-1	sample_01	634	469	0.184615	0.110655	Impure	Impure	impure
ATCAGGTTCGGATAAA-1	sample_01	2494	1302	0.247122	0.197369	Pure	Impure	BSF
ATCATTCAGAGGTCAC-1	sample_01	4646	2336	0.0457885	0.358764	Impure	Pure	PCF
ATCATTCAGCTCATAC-1	sample_01	4472	2301	0.0760833	0.364022	Impure	Pure	PCF
ATCATTCAGGACAAGA-1	sample_01	2390	1410	0.302353	0.181968	Pure	Impure	BSF
ATCATTCAGGACATCG-1	sample_01	597	378	0.156404	0.118159	Impure	Impure	impure
ATCATTCAGGCCTTCG-1	sample_01	4622	2243	0.0499744	0.424788	Impure	Pure	PCF
ATCATTCAGTGATAAC-1	sample_01	4234	2237	0.0989808	0.368536	Impure	Pure	PCF
ATCATTCCAGTTTCGA-1	sample_01	4302	2238	0.0872372	0.347706	Impure	Pure	PCF
ATCATTCCATGCACTA-1	sample_01	5209	2505	0.0403077	0.352181	Impure	Pure	PCF
ATCATTCGTAGACGGT-1	sample_01	4023	2075	0.0546474	0.350875	Impure	Pure	PCF
ATCATTCGTAGGACTG-1	sample_01	560	451	0.180808	0.105488	Impure	Impure	impure
ATCATTCGTCCTGGGT-1	sample_01	1746	977	0.257641	0.19402	Pure	Impure	BSF
ATCATTCGTTCCGCGA-1	sample_01	5490	2509	0.119449	0.423873	Impure	Pure	PCF
ATCATTCTCTCGCTCA-1	sample_01	571	420	0.184359	0.111675	Impure	Impure	impure
ATCATTCTCTGCATAG-1	sample_01	577	414	0.150109	0.0968671	Impure	Impure	impure
ATCCACCAGACTCTTG-1	sample_01	4009	1987	0.0599679	0.407089	Impure	Pure	PCF
ATCCACCAGATTAGAC-1	sample_01	3821	1939	0.0732628	0.379222	Impure	Pure	PCF
ATCCACCAGCAGGTCA-1	sample_01	1309	848	0.269026	0.188308	Pure	Impure	BSF
ATCCACCAGCCTCTCT-1	sample_01	1689	939	0.376641	0.161623	Pure	Impure	BSF
ATCCACCCAGAGGTTG-1	sample_01	2270	1254	0.336974	0.186331	Pure	Impure	BSF
ATCCACCCATTGCCGG-1	sample_01	3938	2190	0.0529231	0.371105	Impure	Pure	PCF
ATCCACCGTCGCAACC-1	sample_01	658	467	0.213013	0.10951	Impure	Impure	impure
ATCCACCGTCTGCCTT-1	sample_01	3832	2083	0.148782	0.298675	Impure	Pure	PCF
ATCCACCGTGAATAAC-1	sample_01	5413	2495	0.135154	0.436012	Impure	Pure	PCF
ATCCACCTCATCGCTC-1	sample_01	3890	1921	0.0620321	0.392653	Impure	Pure	PCF
ATCCACCTCATGCGGC-1	sample_01	4756	2405	0.0414359	0.415821	Impure	Pure	PCF
ATCCATTAGCCTTCTC-1	sample_01	2542	1335	0.353513	0.192565	Pure	Impure	BSF
ATCCATTAGCGGTAGT-1	sample_01	2069	1174	0.147423	0.320363	Impure	Pure	PCF
ATCCATTAGCGTTACT-1	sample_01	5323	2542	0.111801	0.370417	Impure	Pure	PCF
ATCCATTAGTTGGCGA-1	sample_01	2642	1473	0.132301	0.410304	Impure	Pure	PCF
ATCCATTCAAATAGCA-1	sample_01	4144	2407	0.166686	0.344252	Impure	Pure	PCF
ATCCATTCACATTCGA-1	sample_01	2913	1494	0.375776	0.181077	Pure	Impure	BSF
ATCCATTCACTGGAAG-1	sample_01	2269	1385	0.0688077	0.317038	Impure	Pure	PCF
ATCCATTCATTGCTGA-1	sample_01	559	436	0.194128	0.0972143	Impure	Impure	impure
ATCCATTGTATCATGC-1	sample_01	6386	2844	0.151314	0.468532	Impure	Pure	PCF
ATCCCTGAGATGCGAC-1	sample_01	1872	1077	0.344532	0.163516	Pure	Impure	BSF
ATCCCTGAGCACTAAA-1	sample_01	3455	1925	0.073109	0.343657	Impure	Pure	PCF
ATCCCTGAGGAAGTGA-1	sample_01	973	672	0.243103	0.131823	Pure	Impure	BSF
ATCCCTGAGGTACAGC-1	sample_01	2484	1409	0.271244	0.186123	Pure	Impure	BSF
ATCCCTGCAATTTCCT-1	sample_01	3348	1897	0.0968654	0.357073	Impure	Pure	PCF
ATCCCTGCACCTATCC-1	sample_01	3249	1771	0.438244	0.176264	Pure	Impure	BSF
ATCCCTGCAGGTTACT-1	sample_01	3727	1764	0.276506	0.16178	Pure	Impure	BSF
ATCCCTGCATATCTCT-1	sample_01	5671	2754	0.0932949	0.437694	Impure	Pure	PCF
ATCCCTGGTAGCACGA-1	sample_01	620	426	0.145923	0.122976	Impure	Impure	impure
ATCCCTGTCTGACAGT-1	sample_01	3847	2007	0.0598077	0.326704	Impure	Pure	PCF
ATCCGTCAGCTGCGAA-1	sample_01	3303	1735	0.137058	0.363169	Impure	Pure	PCF
ATCCGTCAGGGCTAAC-1	sample_01	5158	2559	0.0970962	0.41698	Impure	Pure	PCF
ATCCGTCAGGTGCGAT-1	sample_01	2489	1452	0.325032	0.193026	Pure	Impure	BSF
ATCCGTCCAGATCATC-1	sample_01	2750	1405	0.387218	0.19955	Pure	Impure	BSF
ATCCGTCGTGTTCGTA-1	sample_01	1327	887	0.241115	0.15002	Pure	Impure	BSF
ATCCGTCTCAACACCA-1	sample_01	4757	2402	0.0837692	0.412389	Impure	Pure	PCF
ATCCGTCTCCGTAGGC-1	sample_01	9935	3891	0.0842756	0.507919	Impure	Pure	PCF
ATCCGTCTCGTTCCCA-1	sample_01	2664	1514	0.120526	0.369063	Impure	Pure	PCF
ATCCGTCTCTAGTGAC-1	sample_01	1711	679	0.330462	0.149091	Pure	Impure	BSF
ATCCGTCTCTTGAACG-1	sample_01	2185	1185	0.366577	0.199976	Pure	Impure	BSF
ATCCTATAGAATAGTC-1	sample_01	5358	2607	0.0829615	0.348901	Impure	Pure	PCF
ATCCTATAGCCGCACT-1	sample_01	2600	1444	0.120083	0.37073	Impure	Pure	PCF
ATCCTATCACATATGC-1	sample_01	3742	1919	0.376301	0.155909	Pure	Impure	BSF
ATCCTATCACTGGACC-1	sample_01	2054	1226	0.291468	0.204093	Pure	Impure	BSF
ATCCTATGTCCACATA-1	sample_01	2529	1374	0.34416	0.175339	Pure	Impure	BSF
ATCCTATGTCCTCATC-1	sample_01	3621	1893	0.371968	0.163629	Pure	Impure	BSF
ATCCTATTCCAACCGG-1	sample_01	4123	2092	0.0629551	0.387105	Impure	Pure	PCF
ATCCTATTCTGCTTAT-1	sample_01	1601	961	0.303045	0.166216	Pure	Impure	BSF
ATCGATGAGAATCGAT-1	sample_01	2204	1325	0.113994	0.340415	Impure	Pure	PCF
ATCGATGAGCTTACGT-1	sample_01	2441	1416	0.114885	0.384542	Impure	Pure	PCF
ATCGATGAGGATACAT-1	sample_01	2211	1258	0.350551	0.175135	Pure	Impure	BSF
ATCGATGCAAATACGA-1	sample_01	2137	1320	0.134667	0.3692	Impure	Pure	PCF
ATCGATGCAAGCGGAT-1	sample_01	1834	1040	0.26225	0.182125	Pure	Impure	BSF
ATCGATGCACTGAATC-1	sample_01	6053	2950	0.224635	0.386262	Pure	Pure	multiplet
ATCGATGCAGAATCGG-1	sample_01	2215	1383	0.336205	0.160903	Pure	Impure	BSF
ATCGATGCATGTGTCA-1	sample_01	618	476	0.143513	0.120222	Impure	Impure	impure
ATCGATGGTAGTCGTT-1	sample_01	3177	1582	0.383455	0.195123	Pure	Impure	BSF
ATCGATGTCGTAGAGG-1	sample_01	773	543	0.118942	0.146698	Pure	Impure	BSF
ATCGATGTCTAGCCAA-1	sample_01	4511	2365	0.126064	0.385954	Impure	Pure	PCF
ATCGCCTAGCATGCGA-1	sample_01	4782	2430	0.0999936	0.365282	Impure	Pure	PCF
ATCGCCTAGCGTCTCG-1	sample_01	3913	2052	0.085359	0.329063	Impure	Pure	PCF
ATCGCCTCACTGCGTG-1	sample_01	2565	1424	0.331712	0.168127	Pure	Impure	BSF
ATCGCCTCATGACCCG-1	sample_01	5807	2857	0.0683141	0.396464	Impure	Pure	PCF
ATCGCCTGTCAAAGTA-1	sample_01	669	517	0.178333	0.129581	Impure	Impure	impure
ATCGGATCAGCTACAT-1	sample_01	3424	1948	0.102923	0.354724	Impure	Pure	PCF
ATCGGATGTAGTTCCA-1	sample_01	4996	2374	0.106654	0.436385	Impure	Pure	PCF
ATCGGATGTCGCCTAG-1	sample_01	630	477	0.165378	0.104536	Impure	Impure	impure
ATCGGATGTCGTCTCT-1	sample_01	2471	1533	0.30641	0.179417	Pure	Impure	BSF
ATCGGATTCGACCATA-1	sample_01	4848	2412	0.0803077	0.415423	Impure	Pure	PCF
ATCGGATTCGCAGAGA-1	sample_01	5800	3045	0.103571	0.430841	Impure	Pure	PCF
ATCGGATTCTCAGTCC-1	sample_01	3809	1933	0.278429	0.196462	Pure	Impure	BSF
ATCGGATTCTTCACAT-1	sample_01	4547	2239	0.0872885	0.379115	Impure	Pure	PCF
ATCGGCGAGACGTCGA-1	sample_01	2161	1360	0.0777564	0.363149	Impure	Pure	PCF
ATCGGCGCAATTTCCT-1	sample_01	2543	1666	0.136788	0.380113	Impure	Pure	PCF
ATCGGCGCAGATCCTA-1	sample_01	10077	4008	0.112782	0.496833	Impure	Pure	PCF
ATCGGCGGTACAGTCT-1	sample_01	555	364	0.152096	0.112216	Impure	Impure	impure
ATCGGCGGTACTTGTG-1	sample_01	4012	2033	0.117788	0.386792	Impure	Pure	PCF
ATCGGCGGTCGTAATC-1	sample_01	6066	2909	0.0877756	0.444365	Impure	Pure	PCF
ATCGGCGGTTAAGGAT-1	sample_01	2900	1644	0.139378	0.328433	Impure	Pure	PCF
ATCGTAGAGACCATTC-1	sample_01	3792	2067	0.102487	0.356385	Impure	Pure	PCF
ATCGTAGCAAATGAGT-1	sample_01	588	398	0.254769	0.122833	Impure	Impure	impure
ATCGTAGCACATGAAA-1	sample_01	1170	738	0.284288	0.165464	Pure	Impure	BSF
ATCGTAGCACGCAGTC-1	sample_01	4565	2369	0.102904	0.385974	Impure	Pure	PCF
ATCGTAGCATGCACTA-1	sample_01	4127	2069	0.0836731	0.358732	Impure	Pure	PCF
ATCGTAGCATGCCGCA-1	sample_01	2377	1269	0.357173	0.194534	Pure	Impure	BSF
ATCGTAGGTAAGAACT-1	sample_01	3175	1647	0.144506	0.3335	Impure	Pure	PCF
ATCGTAGGTTAGCTAC-1	sample_01	1207	752	0.230615	0.183704	Pure	Impure	BSF
ATCGTCCAGACTGGGT-1	sample_01	3695	1996	0.127968	0.364784	Impure	Pure	PCF
ATCGTCCAGCACTCTA-1	sample_01	4531	2274	0.0908526	0.370454	Impure	Pure	PCF
ATCGTCCAGGCATCAG-1	sample_01	5478	2644	0.0666538	0.41426	Impure	Pure	PCF
ATCGTCCAGGCATTTC-1	sample_01	1448	974	0.339827	0.1405	Pure	Impure	BSF
ATCGTCCAGTAATCCC-1	sample_01	1610	947	0.288256	0.167052	Pure	Impure	BSF
ATCGTCCCAAACTAGA-1	sample_01	2790	1658	0.316372	0.180742	Pure	Impure	BSF
ATCGTCCCAACACTAC-1	sample_01	2719	1582	0.368276	0.200744	Pure	Impure	BSF
ATCGTCCCACAAATGA-1	sample_01	1202	767	0.289603	0.150911	Pure	Impure	BSF
ATCGTCCCACTCTAGA-1	sample_01	1521	866	0.182135	0.161425	Pure	Impure	BSF
ATCGTCCCAGTGCCTG-1	sample_01	2628	1511	0.349282	0.189883	Pure	Impure	BSF
ATCGTCCTCAAGGACG-1	sample_01	2600	1238	0.365878	0.212579	Pure	Impure	BSF
ATCGTCCTCGCTGATA-1	sample_01	3908	2025	0.0714038	0.375544	Impure	Pure	PCF
ATCGTCCTCTCTGGTC-1	sample_01	1673	1025	0.246782	0.15623	Pure	Impure	BSF
ATCGTGAAGAGTGGCT-1	sample_01	2004	1273	0.0992885	0.347014	Impure	Pure	PCF
ATCGTGACACGACGCT-1	sample_01	2949	1521	0.420256	0.189129	Pure	Impure	BSF
ATCGTGACACGTATAC-1	sample_01	5929	3076	0.186692	0.303768	Impure	Pure	PCF
ATCGTGAGTAGACAAT-1	sample_01	1984	1138	0.358468	0.217141	Pure	Impure	BSF
ATCGTGAGTCAAGCGA-1	sample_01	1537	962	0.246026	0.168843	Pure	Impure	BSF
ATCGTGAGTCTAGTGT-1	sample_01	4095	2149	0.10091	0.375577	Impure	Pure	PCF
ATCGTGAGTGCATTAC-1	sample_01	3287	1792	0.11009	0.411147	Impure	Pure	PCF
ATCGTGAGTTGGCTAT-1	sample_01	1774	1222	0.256391	0.2182	Pure	Impure	BSF
ATCGTGATCCATCACC-1	sample_01	2295	1520	0.189103	0.346329	Impure	Pure	PCF
ATCTCTAAGCAGCCCT-1	sample_01	4814	2660	0.0404231	0.403738	Impure	Pure	PCF
ATCTCTAAGGGCTGAT-1	sample_01	1964	1182	0.12641	0.317228	Impure	Pure	PCF
ATCTCTACAGGAATAT-1	sample_01	1332	884	0.296333	0.139466	Pure	Impure	BSF
ATCTCTAGTAGTGGCA-1	sample_01	4306	2178	0.0644103	0.423617	Impure	Pure	PCF
ATCTCTAGTATTGGCT-1	sample_01	4377	2350	0.364577	0.154954	Pure	Impure	BSF
ATCTCTATCAATCCGA-1	sample_01	3270	1905	0.0980962	0.331206	Impure	Pure	PCF
ATCTCTATCCTTCTAA-1	sample_01	567	448	0.113423	0.112196	Impure	Impure	impure
ATCTTCAAGAGAGAAC-1	sample_01	1871	1138	0.331013	0.152462	Pure	Impure	BSF
ATCTTCAGTACTCAAC-1	sample_01	4311	2180	0.0909615	0.338127	Impure	Pure	PCF
ATCTTCAGTCGACTTA-1	sample_01	3517	1729	0.120212	0.404905	Impure	Pure	PCF
ATCTTCAGTTAAGGAT-1	sample_01	512	383	0.116231	0.096619	Impure	Impure	impure
ATCTTCAGTTGTCTAG-1	sample_01	2450	1304	0.189096	0.155643	Pure	Impure	BSF
ATCTTCATCACGTCCT-1	sample_01	2172	1256	0.322635	0.185839	Pure	Impure	BSF
ATCTTCATCATTGTGG-1	sample_01	4129	2101	0.0378462	0.377226	Impure	Pure	PCF
ATCTTCATCCCTTGTG-1	sample_01	5705	2648	0.142564	0.40529	Impure	Pure	PCF
ATCTTCATCCTCGCAT-1	sample_01	6251	2877	0.0821987	0.453028	Impure	Pure	PCF
ATGAAAGAGGAACGTC-1	sample_01	1268	813	0.26741	0.184704	Pure	Impure	BSF
ATGAAAGAGGGACCAT-1	sample_01	1770	1053	0.257346	0.179591	Pure	Impure	BSF
ATGAAAGCAACGAGGT-1	sample_01	1934	1268	0.093	0.311429	Impure	Pure	PCF
ATGAAAGCAAGTGACG-1	sample_01	2696	1546	0.344833	0.168258	Pure	Impure	BSF
ATGAAAGCATCTATCT-1	sample_01	4329	2308	0.110455	0.363915	Impure	Pure	PCF
ATGAAAGGTAGGCTGA-1	sample_01	1721	1150	0.245045	0.150792	Pure	Impure	BSF
ATGAAAGGTGCATGAG-1	sample_01	3639	1850	0.372179	0.149077	Pure	Impure	BSF
ATGAAAGGTTTGCAGT-1	sample_01	2036	1087	0.329949	0.173133	Pure	Impure	BSF
ATGAAAGTCAGCTTCC-1	sample_01	5004	2436	0.139474	0.40245	Impure	Pure	PCF
ATGAAAGTCGAGAAAT-1	sample_01	4570	2366	0.102173	0.353383	Impure	Pure	PCF
ATGAAAGTCTGCCCTA-1	sample_01	627	448	0.166321	0.115728	Impure	Impure	impure
ATGACCAAGATGAACT-1	sample_01	5672	2718	0.154955	0.37697	Impure	Pure	PCF
ATGACCAAGCGTCTGC-1	sample_01	2907	1582	0.113846	0.366591	Impure	Pure	PCF
ATGACCAAGCTGTACT-1	sample_01	4469	2320	0.0771538	0.318353	Impure	Pure	PCF
ATGACCACAATAACGA-1	sample_01	2238	1333	0.395423	0.172835	Pure	Impure	BSF
ATGACCACACCCAACG-1	sample_01	3332	1999	0.0482821	0.357262	Impure	Pure	PCF
ATGACCAGTCGTCATA-1	sample_01	1984	1170	0.337346	0.1452	Pure	Impure	BSF
ATGACCAGTGCTGATT-1	sample_01	3732	2003	0.129474	0.306714	Impure	Pure	PCF
ATGACCAGTTGCGTAT-1	sample_01	3429	1898	0.112064	0.345504	Impure	Pure	PCF
ATGACCATCACTTATC-1	sample_01	4333	2216	0.416269	0.176837	Pure	Impure	BSF
ATGACCATCCGTCAAA-1	sample_01	2832	1558	0.297622	0.170244	Pure	Impure	BSF
ATGAGGGAGAGCACTG-1	sample_01	1795	1164	0.326917	0.163462	Pure	Impure	BSF
ATGAGGGAGGACAAGA-1	sample_01	1762	1080	0.072	0.365837	Impure	Pure	PCF
ATGAGGGCATAGCTGT-1	sample_01	6046	2715	0.128782	0.458931	Impure	Pure	PCF
ATGAGGGCATCCGATA-1	sample_01	1571	943	0.379449	0.167228	Pure	Impure	BSF
ATGAGGGCATGATAGA-1	sample_01	3702	2000	0.0921667	0.351466	Impure	Pure	PCF
ATGAGGGGTCAAGCCC-1	sample_01	2003	1137	0.330321	0.179147	Pure	Impure	BSF
ATGAGGGGTCAGGAGT-1	sample_01	2406	1390	0.363558	0.18174	Pure	Impure	BSF
ATGAGGGTCGATGCTA-1	sample_01	2479	1490	0.175391	0.368595	Impure	Pure	PCF
ATGAGTCAGGCCTGAA-1	sample_01	1231	898	0.280942	0.145488	Pure	Impure	BSF
ATGAGTCCAGACAAGC-1	sample_01	3900	2018	0.116763	0.37694	Impure	Pure	PCF
ATGAGTCCAGCGTTGC-1	sample_01	3634	1993	0.0905064	0.368714	Impure	Pure	PCF
ATGAGTCTCAGCTGAT-1	sample_01	2594	1399	0.323654	0.145044	Pure	Impure	BSF
ATGAGTCTCATTGTGG-1	sample_01	987	425	0.131724	0.148222	Impure	Impure	impure
ATGAGTCTCCCGAACG-1	sample_01	8334	3627	0.104564	0.499032	Impure	Pure	PCF
ATGAGTCTCGCCAATA-1	sample_01	4655	2384	0.0627179	0.371998	Impure	Pure	PCF
ATGAGTCTCTATCGGA-1	sample_01	1776	942	0.272949	0.174125	Pure	Impure	BSF
ATGATCGAGCTGAGTG-1	sample_01	3944	2287	0.133564	0.312758	Impure	Pure	PCF
ATGATCGAGGGCAGGA-1	sample_01	1954	1129	0.0921154	0.336633	Impure	Pure	PCF
ATGATCGAGTGGCCTC-1	sample_01	4667	2361	0.108372	0.364109	Impure	Pure	PCF
ATGATCGCACGTCATA-1	sample_01	1632	947	0.360154	0.159986	Pure	Impure	BSF
ATGATCGCATCCGATA-1	sample_01	3156	1761	0.144064	0.410514	Impure	Pure	PCF
ATGATCGGTGATATAG-1	sample_01	2201	1254	0.142301	0.371204	Impure	Pure	PCF
ATGATCGTCCTTTGAT-1	sample_01	6318	3041	0.0975128	0.443569	Impure	Pure	PCF
ATGATCGTCGTGACTA-1	sample_01	1153	847	0.0430641	0.274792	Impure	Pure	PCF
ATGCATGAGCGCCGTT-1	sample_01	1455	924	0.288686	0.180938	Pure	Impure	BSF
ATGCATGAGGACTATA-1	sample_01	9265	3577	0.134878	0.476341	Impure	Pure	PCF
ATGCATGAGGAGGCAG-1	sample_01	2907	1770	0.101192	0.458827	Impure	Pure	PCF
ATGCATGCAAGTGATA-1	sample_01	3034	1578	0.327404	0.216325	Pure	Impure	BSF
ATGCATGGTGACATCT-1	sample_01	3088	1668	0.304929	0.183577	Pure	Impure	BSF
ATGCCTCCACTGCGAC-1	sample_01	2146	1131	0.349583	0.173877	Pure	Impure	BSF
ATGCCTCCAGGCACTC-1	sample_01	4682	2352	0.0549038	0.34398	Impure	Pure	PCF
ATGCCTCGTAGGATAT-1	sample_01	7167	3263	0.0960064	0.430784	Impure	Pure	PCF
ATGCCTCGTTCAGTAC-1	sample_01	1186	778	0.263622	0.129518	Pure	Impure	BSF
ATGCCTCGTTTCGTTT-1	sample_01	4876	2435	0.0589103	0.376635	Impure	Pure	PCF
ATGCCTCTCGCGTGAC-1	sample_01	4047	2001	0.244859	0.156732	Pure	Impure	BSF
ATGCGATAGAGGGTGG-1	sample_01	3389	1854	0.103872	0.343575	Impure	Pure	PCF
ATGCGATAGATGAACT-1	sample_01	7036	3087	0.112244	0.477034	Impure	Pure	PCF
ATGCGATAGCCTATCA-1	sample_01	1553	967	0.347538	0.159228	Pure	Impure	BSF
ATGCGATAGTAAATGC-1	sample_01	510	376	0.204038	0.107702	Impure	Impure	impure
ATGCGATCATGGAACG-1	sample_01	3915	1977	0.144872	0.39198	Impure	Pure	PCF
ATGCGATGTACCAATC-1	sample_01	4625	2330	0.05525	0.372536	Impure	Pure	PCF
ATGCGATGTCACTGAT-1	sample_01	3124	1736	0.115955	0.353151	Impure	Pure	PCF
ATGCGATTCAAGTCTG-1	sample_01	1498	911	0.272218	0.181276	Pure	Impure	BSF
ATGCGATTCGTCTAAG-1	sample_01	3308	1788	0.106109	0.365665	Impure	Pure	PCF
ATGCGATTCGTCTACC-1	sample_01	521	387	0.202865	0.10652	Impure	Impure	impure
ATGCGATTCGTGCACG-1	sample_01	1246	773	0.154128	0.174095	Pure	Impure	BSF
ATGGAGGAGAACTCCT-1	sample_01	2189	1231	0.159404	0.315873	Impure	Pure	PCF
ATGGAGGAGAGGTTTA-1	sample_01	2997	1535	0.361596	0.144954	Pure	Impure	BSF
ATGGAGGAGATGTTCC-1	sample_01	1303	917	0.270968	0.156159	Pure	Impure	BSF
ATGGAGGAGCGATCGA-1	sample_01	816	620	0.222346	0.129317	Pure	Impure	BSF
ATGGAGGAGGCCTGCT-1	sample_01	4741	2347	0.0467564	0.394744	Impure	Pure	PCF
ATGGAGGAGTAGCATA-1	sample_01	2856	1688	0.12216	0.390462	Impure	Pure	PCF
ATGGAGGAGTCATCCA-1	sample_01	2474	1419	0.104814	0.375065	Impure	Pure	PCF
ATGGAGGCAATTTCTC-1	sample_01	545	433	0.14941	0.0907361	Impure	Impure	impure
ATGGAGGCACGTTGGC-1	sample_01	3896	1973	0.138692	0.35519	Impure	Pure	PCF
ATGGAGGGTACTGCCG-1	sample_01	4473	2283	0.0445	0.418937	Impure	Pure	PCF
ATGGAGGGTGAGATCG-1	sample_01	3658	2018	0.122	0.373839	Impure	Pure	PCF
ATGGAGGTCGCTATTT-1	sample_01	3425	1685	0.135244	0.443514	Impure	Pure	PCF
ATGGAGGTCTGCTCTG-1	sample_01	1737	1031	0.230103	0.148494	Pure	Impure	BSF
ATGGAGGTCTTCTAAC-1	sample_01	4440	2183	0.0628526	0.376712	Impure	Pure	PCF
ATGGATCAGACTCTAC-1	sample_01	10271	3914	0.075609	0.496462	Impure	Pure	PCF
ATGGATCAGCCGATAG-1	sample_01	4154	2252	0.145859	0.350726	Impure	Pure	PCF
ATGGATCAGTAACGTA-1	sample_01	1057	739	0.203667	0.15348	Pure	Impure	BSF
ATGGATCAGTCCTGTA-1	sample_01	2670	1570	0.102455	0.390635	Impure	Pure	PCF
ATGGATCAGTTGTACC-1	sample_01	526	404	0.183218	0.117143	Impure	Impure	impure
ATGGATCCACCGAATT-1	sample_01	3384	1811	0.111513	0.400014	Impure	Pure	PCF
ATGGATCCACGGGCTT-1	sample_01	3791	2045	0.0836859	0.400393	Impure	Pure	PCF
ATGGATCGTACCCGAC-1	sample_01	2107	1151	0.309154	0.198183	Pure	Impure	BSF
ATGGATCGTGGTCCGT-1	sample_01	5219	2550	0.0680577	0.393454	Impure	Pure	PCF
ATGGATCTCACATACG-1	sample_01	2920	1761	0.0702692	0.30981	Impure	Pure	PCF
ATGGATCTCATCGCCT-1	sample_01	1774	1039	0.262282	0.161129	Pure	Impure	BSF
ATGGATCTCGTTCAGA-1	sample_01	1170	795	0.229788	0.185669	Pure	Impure	BSF
ATGGATCTCTTTCCAA-1	sample_01	3163	1655	0.286282	0.169065	Pure	Impure	BSF
ATGGGAGAGTCCGCCA-1	sample_01	5044	2594	0.228609	0.317183	Impure	Pure	PCF
ATGGGAGAGTTGAAGT-1	sample_01	1111	697	0.279244	0.145821	Pure	Impure	BSF
ATGGGAGGTGGACTGA-1	sample_01	3041	1661	0.0711731	0.376194	Impure	Pure	PCF
ATGGGAGTCGGTCTGG-1	sample_01	1563	912	0.290487	0.176	Pure	Impure	BSF
ATGGGAGTCTCCAATT-1	sample_01	1603	1042	0.353494	0.183698	Pure	Impure	BSF
ATGGGAGTCTCGAACA-1	sample_01	4737	2325	0.11934	0.41824	Impure	Pure	PCF
ATGGGAGTCTGAATGC-1	sample_01	1598	910	0.275981	0.168325	Pure	Impure	BSF
ATGGGAGTCTTCCACG-1	sample_01	561	406	0.153141	0.116286	Impure	Impure	impure
ATGGGTTAGCAAGTGC-1	sample_01	649	475	0.180968	0.0849405	Impure	Impure	impure
ATGGGTTAGCTCCCTT-1	sample_01	3343	1646	0.343301	0.177593	Pure	Impure	BSF
ATGGGTTCACTGAGGA-1	sample_01	3323	1965	0.378038	0.138115	Pure	Impure	BSF
ATGGGTTGTAGTGATA-1	sample_01	1512	894	0.305962	0.165871	Pure	Impure	BSF
ATGGGTTGTGTAGGAC-1	sample_01	890	610	0.259628	0.113373	Pure	Impure	BSF
ATGGGTTTCGGACTTA-1	sample_01	5579	2721	0.131288	0.398008	Impure	Pure	PCF
ATGGTTGAGCCTGGAA-1	sample_01	1968	1364	0.103423	0.350313	Impure	Pure	PCF
ATGGTTGCACTAGTAC-1	sample_01	3269	1651	0.366429	0.176788	Pure	Impure	BSF
ATGGTTGCAGCTCGGT-1	sample_01	4885	2365	0.0961218	0.374494	Impure	Pure	PCF
ATGGTTGCATGGAAGC-1	sample_01	527	395	0.16475	0.0912361	Impure	Impure	impure
ATGGTTGGTCACAATC-1	sample_01	4849	2413	0.0689679	0.371585	Impure	Pure	PCF
ATGGTTGGTCACTCGG-1	sample_01	2447	1513	0.121821	0.411206	Impure	Pure	PCF
ATGGTTGGTGCCGAAA-1	sample_01	1033	654	0.207122	0.132911	Pure	Impure	BSF
ATGGTTGGTTTCCCAC-1	sample_01	2817	1525	0.327865	0.16301	Pure	Impure	BSF
ATGGTTGTCATGCTAG-1	sample_01	4139	2099	0.0711282	0.372649	Impure	Pure	PCF
ATGGTTGTCCACAGGC-1	sample_01	2652	1483	0.294596	0.147103	Pure	Impure	BSF
ATGGTTGTCCACTGAA-1	sample_01	6429	2894	0.0870897	0.413726	Impure	Pure	PCF
ATGGTTGTCTATGCCC-1	sample_01	1924	1016	0.323417	0.199569	Pure	Impure	BSF
ATGGTTGTCTTGGATG-1	sample_01	3265	1610	0.150179	0.351125	Impure	Pure	PCF
ATGTCCCAGAAGGGAT-1	sample_01	4199	2259	0.0513462	0.325849	Impure	Pure	PCF
ATGTCCCAGACAAGCC-1	sample_01	828	537	0.138365	0.119724	Pure	Impure	BSF
ATGTCCCAGCACTCGC-1	sample_01	1226	872	0.311538	0.179595	Pure	Impure	BSF
ATGTCCCCACATACTG-1	sample_01	2966	1684	0.0840256	0.328165	Impure	Pure	PCF
ATGTCCCCAGACAAAT-1	sample_01	5566	2670	0.180513	0.399228	Impure	Pure	PCF
ATGTCCCGTATGAGCG-1	sample_01	2059	1140	0.422513	0.146395	Pure	Impure	BSF
ATGTCCCGTGCATACT-1	sample_01	2339	1276	0.292301	0.164089	Pure	Impure	BSF
ATGTCCCGTGCCCACA-1	sample_01	4043	1954	0.251224	0.201546	Pure	Impure	BSF
ATGTCCCTCAACCCGG-1	sample_01	3346	1653	0.130474	0.433688	Impure	Pure	PCF
ATGTCCCTCCGATAAC-1	sample_01	2337	1424	0.329359	0.175286	Pure	Impure	BSF
ATGTCCCTCTGCTTTA-1	sample_01	4017	2115	0.154224	0.336871	Impure	Pure	PCF
ATGTCTTAGCCGATCC-1	sample_01	2413	1371	0.325981	0.181208	Pure	Impure	BSF
ATGTCTTCAATGTGGG-1	sample_01	3171	1607	0.312872	0.179101	Pure	Impure	BSF
ATGTCTTCACAATGTC-1	sample_01	1421	472	0	0.362427	Impure	Pure	PCF
ATGTCTTGTAACAGGC-1	sample_01	4566	2311	0.0729744	0.309875	Impure	Pure	PCF
ATGTCTTGTGTTATCG-1	sample_01	1681	919	0.304923	0.158159	Pure	Impure	BSF
ATGTCTTGTTACGCCG-1	sample_01	5836	3110	0.137551	0.478446	Impure	Pure	PCF
ATGTCTTTCAGGTAAA-1	sample_01	3730	2011	0.307071	0.1697	Pure	Impure	BSF
ATGTCTTTCTCCCAAC-1	sample_01	5324	2639	0.096	0.429958	Impure	Pure	PCF
ATTACCTAGAGCCTGA-1	sample_01	5228	2530	0.146064	0.406948	Impure	Pure	PCF
ATTACCTAGCTAAGTA-1	sample_01	571	409	0.084891	0.106242	Impure	Impure	impure
ATTACCTAGGCAGCTA-1	sample_01	1847	1003	0.239628	0.198058	Pure	Impure	BSF
ATTACCTAGTAAATGC-1	sample_01	1145	786	0.111051	0.27978	Impure	Pure	PCF
ATTACCTGTACAAACA-1	sample_01	4476	2332	0.1065	0.39452	Impure	Pure	PCF
ATTACCTGTACGCGTC-1	sample_01	3666	1939	0.0903397	0.361474	Impure	Pure	PCF
ATTACCTGTTCTCACC-1	sample_01	2173	1169	0.368333	0.170494	Pure	Impure	BSF
ATTACCTTCGTGTTCC-1	sample_01	2435	1341	0.155814	0.350107	Impure	Pure	PCF
ATTACTCAGCTAGAAT-1	sample_01	4945	2507	0.104558	0.349062	Impure	Pure	PCF
ATTACTCAGGTAACTA-1	sample_01	4060	2134	0.0898333	0.337766	Impure	Pure	PCF
ATTACTCAGTAGTCCT-1	sample_01	1338	747	0.231333	0.17445	Pure	Impure	BSF
ATTACTCCACGTACAT-1	sample_01	4261	2129	0.131776	0.396639	Impure	Pure	PCF
ATTACTCCAGGAATAT-1	sample_01	2072	1288	0.386679	0.145254	Pure	Impure	BSF
ATTACTCGTCACCACG-1	sample_01	2376	1289	0.364673	0.182097	Pure	Impure	BSF
ATTACTCGTTTCGTAG-1	sample_01	4858	2466	0.123462	0.396938	Impure	Pure	PCF
ATTACTCTCGGAAACG-1	sample_01	5406	2681	0.113731	0.42274	Impure	Pure	PCF
ATTACTCTCGTGCGAC-1	sample_01	3167	1738	0.146859	0.314863	Impure	Pure	PCF
ATTACTCTCGTTCTAT-1	sample_01	2265	1201	0.320199	0.207486	Pure	Impure	BSF
ATTATCCAGCAAGTGC-1	sample_01	1592	866	0.357686	0.147514	Pure	Impure	BSF
ATTATCCAGGACTATA-1	sample_01	1432	970	0.391667	0.163675	Pure	Impure	BSF
ATTATCCAGGCCTTCG-1	sample_01	3044	1672	0.108628	0.397637	Impure	Pure	PCF
ATTATCCCACGACTAT-1	sample_01	2801	1435	0.278699	0.179863	Pure	Impure	BSF
ATTATCCGTAACCAGG-1	sample_01	2724	1554	0.111538	0.364605	Impure	Pure	PCF
ATTATCCGTCGTGTTA-1	sample_01	1295	941	0.298301	0.124149	Pure	Impure	BSF
ATTATCCGTGTGAGCA-1	sample_01	3070	1634	0.308173	0.168756	Pure	Impure	BSF
ATTCACTAGACTGGGT-1	sample_01	1352	828	0.224891	0.131484	Pure	Impure	BSF
ATTCACTAGGCTGAAC-1	sample_01	2547	1435	0.13109	0.327034	Impure	Pure	PCF
ATTCACTCAAGAATAC-1	sample_01	563	432	0.170596	0.0906111	Impure	Impure	impure
ATTCACTCAAGCACCC-1	sample_01	2741	1548	0.198808	0.32719	Impure	Pure	PCF
ATTCACTCATCTATCT-1	sample_01	5850	2472	0.0840769	0.469357	Impure	Pure	PCF
ATTCACTCATGCAGGA-1	sample_01	4300	2166	0.122564	0.347546	Impure	Pure	PCF
ATTCACTGTAGGAAAG-1	sample_01	3719	2030	0.0799038	0.351155	Impure	Pure	PCF
ATTCACTGTCAGATTC-1	sample_01	4364	2111	0.114051	0.422542	Impure	Pure	PCF
ATTCACTTCGTAGTCA-1	sample_01	3310	1635	0.132455	0.337935	Impure	Pure	PCF
ATTCACTTCGTGGAAG-1	sample_01	1377	866	0.253699	0.185893	Pure	Impure	BSF
ATTCAGGAGATAACAC-1	sample_01	744	526	0.224417	0.100871	Pure	Impure	BSF
ATTCAGGAGGAACATT-1	sample_01	2211	1201	0.327801	0.166502	Pure	Impure	BSF
ATTCAGGAGGCGAAGG-1	sample_01	2814	1627	0.0993333	0.373016	Impure	Pure	PCF
ATTCAGGAGGGTGGGA-1	sample_01	1956	1118	0.260353	0.180639	Pure	Impure	BSF
ATTCAGGAGTCATGAA-1	sample_01	3368	1891	0.116064	0.342429	Impure	Pure	PCF
ATTCAGGCAAAGACTA-1	sample_01	1203	784	0.271083	0.144825	Pure	Impure	BSF
ATTCAGGCACCTGTCT-1	sample_01	5948	2783	0.109833	0.4047	Impure	Pure	PCF
ATTCAGGCATGCACTA-1	sample_01	768	540	0.172128	0.113286	Impure	Impure	impure
ATTCAGGGTTACGTAC-1	sample_01	5580	2618	0.0644295	0.399823	Impure	Pure	PCF
ATTCAGGTCAACGTGT-1	sample_01	1281	725	0.259686	0.155196	Pure	Impure	BSF
ATTCAGGTCAACTCTT-1	sample_01	4663	2230	0.0835833	0.357778	Impure	Pure	PCF
ATTCAGGTCCCGAGAC-1	sample_01	6894	2966	0.133096	0.417714	Impure	Pure	PCF
ATTCAGGTCGCCGATG-1	sample_01	5503	2710	0.129865	0.409579	Impure	Pure	PCF
ATTCAGGTCTTCGATT-1	sample_01	3137	1571	0.155083	0.416625	Impure	Pure	PCF
ATTCATCAGACTGAGC-1	sample_01	6107	2826	0.0671923	0.466137	Impure	Pure	PCF
ATTCATCAGAGCAGCT-1	sample_01	3865	2083	0.168622	0.338944	Impure	Pure	PCF
ATTCATCAGGATAATC-1	sample_01	3740	2052	0.114071	0.37978	Impure	Pure	PCF
ATTCATCCAAAGGCGT-1	sample_01	3309	1891	0.0795128	0.358558	Impure	Pure	PCF
ATTCATCCAAAGTATG-1	sample_01	1580	954	0.24541	0.175742	Pure	Impure	BSF
ATTCATCCAGTCAGTT-1	sample_01	6478	2961	0.0725192	0.401169	Impure	Pure	PCF
ATTCATCTCGAACCAT-1	sample_01	1990	1113	0.0979487	0.348569	Impure	Pure	PCF
ATTCATCTCTATTGTC-1	sample_01	6230	2886	0.0693974	0.416567	Impure	Pure	PCF
ATTCCATCAAACGGCA-1	sample_01	575	435	0.148513	0.0955397	Impure	Impure	impure
ATTCCATCAGAAGCGT-1	sample_01	3010	1607	0.0832308	0.329252	Impure	Pure	PCF
ATTCCATCATTCGGGC-1	sample_01	5290	2616	0.0558269	0.414635	Impure	Pure	PCF
ATTCCATCATTGTACG-1	sample_01	2736	1639	0.0691795	0.346169	Impure	Pure	PCF
ATTCCATGTTCCGTTC-1	sample_01	4527	2227	0.065859	0.348187	Impure	Pure	PCF
ATTCCATGTTTCTTAC-1	sample_01	6458	2961	0.214692	0.335488	Pure	Pure	multiplet
ATTCCATTCCCAAGTA-1	sample_01	4757	2413	0.0687308	0.409123	Impure	Pure	PCF
ATTCCATTCCTTCACG-1	sample_01	3637	1769	0.381429	0.187173	Pure	Impure	BSF
ATTCCATTCGCTGACG-1	sample_01	2813	1687	0.256532	0.190647	Pure	Impure	BSF
ATTCCCGAGACACACG-1	sample_01	2806	1608	0.132641	0.342992	Impure	Pure	PCF
ATTCCCGCAACCGATT-1	sample_01	697	503	0.141564	0.123181	Impure	Impure	impure
ATTCCCGCAACGGGTA-1	sample_01	3588	1952	0.296647	0.17598	Pure	Impure	BSF
ATTCCCGCAAGTGGCA-1	sample_01	967	576	0.254487	0.136978	Impure	Impure	impure
ATTCCCGCAGAACGCA-1	sample_01	2574	1476	0.343474	0.135651	Pure	Impure	BSF
ATTCCCGCAGTAGTGG-1	sample_01	2367	1334	0.121833	0.371046	Impure	Pure	PCF
ATTCCCGGTATCCTCC-1	sample_01	720	546	0.201231	0.0936825	Impure	Impure	impure
ATTCCCGGTCACCTTC-1	sample_01	5120	2268	0.315744	0.153784	Pure	Impure	BSF
ATTCCCGTCGTTCTGC-1	sample_01	2241	1157	0.333538	0.189847	Pure	Impure	BSF
ATTCCTAAGAGTTGAT-1	sample_01	1748	1070	0.278327	0.188282	Pure	Impure	BSF
ATTCCTAAGCTAGAGC-1	sample_01	3076	1816	0.0906346	0.365405	Impure	Pure	PCF
ATTCCTACAAATACGA-1	sample_01	3380	1695	0.432974	0.203603	Pure	Impure	BSF
ATTCCTACAGCAATTC-1	sample_01	2078	1238	0.243058	0.151446	Pure	Impure	BSF
ATTCCTAGTCTACACA-1	sample_01	5081	2398	0.109141	0.366379	Impure	Pure	PCF
ATTCCTAGTGCCTGCA-1	sample_01	5101	2589	0.117891	0.356097	Impure	Pure	PCF
ATTCGTTAGTGCGCTC-1	sample_01	817	586	0.253006	0.0985298	Impure	Impure	impure
ATTCGTTCAAAGGATT-1	sample_01	6456	2805	0.10166	0.460585	Impure	Pure	PCF
ATTCGTTCAATTGAGA-1	sample_01	1676	1035	0.272942	0.117107	Pure	Impure	BSF
ATTCGTTCACGCAAAG-1	sample_01	1549	912	0.284936	0.176631	Pure	Impure	BSF
ATTCGTTGTACTAACC-1	sample_01	3772	2047	0.155494	0.333692	Impure	Pure	PCF
ATTCGTTGTGCGTTTA-1	sample_01	1643	963	0.25566	0.159808	Pure	Impure	BSF
ATTCGTTGTGGTGATG-1	sample_01	1991	1059	0.270256	0.187774	Pure	Impure	BSF
ATTCGTTGTGTATACC-1	sample_01	2533	1502	0.0933141	0.380952	Impure	Pure	PCF
ATTCGTTGTGTGAGCA-1	sample_01	2840	1562	0.327122	0.187327	Pure	Impure	BSF
ATTCGTTTCATGCTAG-1	sample_01	3568	1895	0.0985321	0.350315	Impure	Pure	PCF
ATTCGTTTCGGCTGTG-1	sample_01	1631	927	0.295519	0.164405	Pure	Impure	BSF
ATTCGTTTCGTGAGAG-1	sample_01	1444	830	0.303801	0.165776	Pure	Impure	BSF
ATTCGTTTCGTTCAGA-1	sample_01	2212	1241	0.140256	0.354502	Impure	Pure	PCF
ATTCGTTTCTTGGCTC-1	sample_01	3951	1916	0.16541	0.34125	Impure	Pure	PCF
ATTCTACAGGTAAGTT-1	sample_01	8957	3796	0.133859	0.513276	Impure	Pure	PCF
ATTCTACAGGTTAGTA-1	sample_01	1548	884	0.363808	0.184425	Pure	Impure	BSF
[truncated: 15,239 more rows]

## Sheet: sample summary
Summary metrics of scRNA-seq samples after form isolation
The mean average was taken of UMI, genes and %kDNA per cell before and after QC filtering.
Total cells and genes recovered before and after QC filtering is also shown.
	Pre QC filtering					Post QC filtering
	mean UMI per cell	mean genes per cells	mean % of kDNA transcript per cell	total cells	total genes	mean UMI per cell	mean genes per cells	mean % of kDNA transcript per cell	total cells	total genes	Percentage cells retained
BSF Fresh	2122	1209	0.487598	3409	9491	2084	1188	0.469974	2767	9491	81.1675
BSF Frozen	2189	1212	0.565171	1973	9615	2142	1192	0.548061	1599	9615	81.0441
PCF Fresh	3844	2039	1.44219	4302	9491	3744	1995	1.42087	3305	9491	76.8247
PCF Frozen	3517	1897	1.35647	5971	9615	3480	1887	1.34153	4335	9615	72.6009

## Sheet: variable genes
Lists of variable genes identified for each sample (BSF fresh, BSF frozen, PCF fresh and PCF frozen) and those used for subsequent integration, dimension reduction and pseudotime inference (BSF integration and PCF integration)
For details of how variable genes were select, see code at Zenodo (10.5281/zenodo.7508131).
BSF fresh	BSF frozen	PCF Fresh	PCF frozen	BSF integration	PCF integration
Tb427-110013500	Tb427-110013500	Tb427-100109300	Tb427-100109300	Tb427-110013500	Tb427-100109300
Tb427-100149600	Tb427-100112400	Tb427-080028700	Tb427-100109200	Tb427-100112400	Tb427-100109200
Tb427-100112400	Tb427-060036900	Tb427-100112400	Tb427-060008400	Tb427-110150500	Tb427-080028700
Tb427-110150500	Tb427-080046800	Tb427-100109200	Tb427-080005100:pseudogene	Tb427-060036900	Tb427-100112400
Tb427-100023600	Tb427-080007400	Tb427-030040300	Tb427-100112400	Tb427-080028700	Tb427-060008400
Tb427-080028700	Tb427-080028700	Tb427-110150500	Tb427-080028700	Tb427-080046800	Tb427-030040300
Tb427-100062200	Tb427-110150500	Tb427-060008400	Tb427-110013500	Tb427-080007400	Tb427-110150500
Tb427-090058000	Tb427-050012800	Tb427-070076200	Tb427-090031800	Tb427-050012800	Tb427-080007400
Tb427-060036900	Tb427-040029800	Tb427-080007400	Tb427-080007400	Tb427-110165900	Tb427-080005100:pseudogene
12S-rRNA	Tb427-110165900	Tb427-010023900	9S-rRNA	Tb427-040029800	Tb427-110013500
Tb427-080046800	Tb427-110166800	9S-rRNA	Tb427-110150500	Tb427-100085200	9S-rRNA
Tb427-110169500	Tb427-040042400	Tb427-110165900	Tb427-030040300	Tb427-110166800	Tb427-110165900
Tb427-080007400	Tb427-060008400	Tb427-110013500	Tb427-110165900	Tb427-010029100	Tb427-050008600
Tb427-050012800	Tb427-100085200	Tb427-050008600	Tb427-080005200	Tb427-060039800	Tb427-080046800
Tb427-010029100	Tb427-110015700	Tb427-080005100:pseudogene	Tb427-020029800	Tb427-080007500	Tb427-090058000
Tb427-110079200	Tb427-060039800	Tb427-080046800	Tb427-050008600	Tb427-110079200	Tb427-020029800
Tb427-070031100	Tb427-070025800	Tb427-050009000	Tb427-010025700	Tb427-080005200	Tb427-040021400
Tb427-100085200	Tb427-000014500:pseudogene	Tb427-060051900	Tb427-060036900	Tb427-070031100	Tb427-070076200
Tb427-110165900	Tb427-100125100	Tb427-110079200	Tb427-090058000	Tb427-100167200	Tb427-100120400
Tb427-080007500	Tb427-080007500	Tb427-040021400	Tb427-110031800	Tb427-090034500	Tb427-110079200
Tb427-090066200	Tb427-090034500	Tb427-040052800	Tb427-080046800	Tb427-080068100	Tb427-060036900
Tb427-040029800	Tb427-100167200	Tb427-100120400	Tb427-010029100	Tb427-110015700	Tb427-060039800
Tb427-090031800	Tb427-070050100	Tb427-090058000	Tb427-010016800	Tb427-100095100	Tb427-110183600
Tb427-060039800	Tb427-110079200	Tb427-060025400	Tb427-060039800	Tb427-110183600	Tb427-040052800
Tb427-100095100	Tb427-010029100	Tb427-080009800	Tb427-110150100	Tb427-110085200	Tb427-100085500
Tb427-080005200	Tb427-080005200	Tb427-080072100	Tb427-100125100	Tb427-110152700	Tb427-080005200
Tb427-110166800	Tb427-100161200	Tb427-110183600	Tb427-100085500	Tb427-100011900	Tb427-080072100
Tb427-000110300	Tb427-080068100	Tb427-080040400	Tb427-100120400	Tb427-000015200:pseudogene	Tb427-050009000
Tb427-080072900	Tb427-110085200	Tb427-030037700	Tb427-040021400	Tb427-080072900	Tb427-010023900
Tb427-090061000	Tb427-100011900	Tb427-020029800	Tb427-030055300	Tb427-040015600	Tb427-020032100
Tb427-010027100	Tb427-080088800	Tb427-020032100	Tb427-100064800	Tb427-110185100	Tb427-110015700
Tb427-030030200	Tb427-030018100	Tb427-050041600	Tb427-110183600	Tb427-080009800	Tb427-080009800
Tb427-060051900	Tb427-110183600	Tb427-110015700	Tb427-100017900	Tb427-000014500:pseudogene	Tb427-010025700
Tb427-040021400	Tb427-110152700	Tb427-060039800	Tb427-110015700	Tb427-010027100	Tb427-100064800
Tb427-100167200	Tb427-020008100	Tb427-100085500	Tb427-110079200	Tb427-090031800	Tb427-010029100
Tb427-080009800	Tb427-110150100	Tb427-040029800	Tb427-020032100	Tb427-100006500	Tb427-060025400
Tb427-110037600	Tb427-110185100	Tb427-060036900	Tb427-090036700	Tb427-110070500	Tb427-110150100
Tb427-080068100	Tb427-100011100	Tb427-110037600	Tb427-080072100	Tb427-100015200	Tb427-040029800
Tb427-110183600	Tb427-070031100	Tb427-070038600	Tb427-040052800	Tb427-100112000	Tb427-090031800
Tb427-100102600	Tb427-070052900	Tb427-100064800	Tb427-060008500	Tb427-020008100	Tb427-100017900
Tb427-030040300	Tb427-000015200:pseudogene	Tb427-080020700	Tb427-070076200	Tb427-030037700	Tb427-100062200
Tb427-110152700	Tb427-070072900	Tb427-100062200	Tb427-020017800	Tb427-050032600	Tb427-070038600
Tb427-090034500	Tb427-100095100	Tb427-090030900	Tb427-080007500	Tb427-060008400	Tb427-050041600
Tb427-020017800	Tb427-090012800	Tb427-110181600	Tb427-080009800	Tb427-090061000	Tb427-110009300
Tb427-110060300	Tb427-100112000	Tb427-100076900	Tb427-050026200	Tb427-090012800	Tb427-110031800
Tb427-050009000	Tb427-110009300	Tb427-110158700	Tb427-040015600	Tb427-030020200	Tb427-020017800
Tb427-110085200	Tb427-100112200	Tb427-030020200	Tb427-080029500	Tb427-020011800	Tb427-030008400
Tb427-040015600	Tb427-110073700	Tb427-110073800	Tb427-100161200	Tb427-030008400	Tb427-100161200
Tb427-110055100	Tb427-050032600	Tb427-010027700	Tb427-050009000	Tb427-110073700	Tb427-040015600
Tb427-110073800	Tb427-100125200	Tb427-080005200	Tb427-060025400	Tb427-100026100	Tb427-050026200
Tb427-110015700	Tb427-040015600	Tb427-080072900	Tb427-090034500	Tb427-090066200	Tb427-090036700
Tb427-000015200:pseudogene	Tb427-080084800	Tb427-010029100	Tb427-090032000	Tb427-070052900	Tb427-010020500
Tb427-100026100	Tb427-100015200	Tb427-080043400	Tb427-110009300	Tb427-080084800	Tb427-100076900
Tb427-030037700	Tb427-110123300	Tb427-010025700	Tb427-070025800	Tb427-020017800	Tb427-020008100
COI	Tb427-100006500	Tb427-030009000	Tb427-100062200	Tb427-010023900	Tb427-060051900
Tb427-100011900	Tb427-090072800	Tb427-110150100	Tb427-040029800	Tb427-110169500	Tb427-100011900
Tb427-100006500	Tb427-030008400	Tb427-010027100	Tb427-010023900	Tb427-100109300	Tb427-090085100
Tb427-110070500	Tb427-000015300	Tb427-020008100	Tb427-110133300	Tb427-110073800	Tb427-110158700
Tb427-030046000	Tb427-100109200	Tb427-110009300	Tb427-030008400	Tb427-010014500	Tb427-020017700
Tb427-030009000	Tb427-110023600	Tb427-110152700	Tb427-070038600	Tb427-080008900	Tb427-030020200
Tb427-030020200	Tb427-030009900	Tb427-030008400	Tb427-030048400	Tb427-110023600	Tb427-010027100
Tb427-080019600	Tb427-110015000	Tb427-090085100	Tb427-090027000	Tb427-040015000	Tb427-090030900
Tb427-010020500	Tb427-100109300	Tb427-100011900	Tb427-050032600	Tb427-070072900	Tb427-080043400
Tb427-110185100	Tb427-040015000	Tb427-100017900	Tb427-030018100	Tb427-030029900	Tb427-080070100
Tb427-080008900	Tb427-000245800:pseudogene	Tb427-100148200	Tb427-080009100	Tb427-110124600	Tb427-110138200
Tb427-080066600	Tb427-040005700	Tb427-080070100	Tb427-020017700	Tb427-100096900	Tb427-110073800
Tb427-050034300	Tb427-110070500	Tb427-050034300	Tb427-010020500	Tb427-080040400	Tb427-100006500
Tb427-060018100	Tb427-080072900	Tb427-010020500	Tb427-050012800	Tb427-110150100	Tb427-030037700
Tb427-010016800	Tb427-080048200	MURF4	Tb427-050012900	Tb427-060051900	Tb427-110181600
Tb427-070034600	Tb427-080009800	Tb427-100157100	Tb427-110185100	Tb427-000110300	Tb427-070025800
Tb427-090066100	Tb427-020011800	Tb427-070047100	Tb427-050041600	Tb427-040005700	Tb427-110015000
Tb427-080040400	Tb427-060020800:pseudogene	Tb427-110015000	Tb427-100085200	Tb427-100112200	Tb427-100085200
Tb427-020011800	Tb427-030029900	Tb427-100161200	Tb427-090012800	Tb427-080019600	Tb427-100096900
Tb427-100015200	Tb427-010014500	Tb427-110169500	Tb427-110138200	Tb427-110125400	Tb427-070068800
Tb427-070076200	Tb427-040050500	Tb427-100023600	Tb427-070034600	Tb427-110015000	Tb427-090034500
Tb427-080005100:pseudogene	Tb427-010023900	Tb427-050012400	Tb427-060008700:pseudogene	Tb427-110031800	Tb427-050034300
Tb427-110042100	Tb427-010027100	Tb427-020017800	Tb427-100011900	Tb427-100085500	Tb427-110124600
Tb427-110014200	Tb427-110125400	Tb427-100096800	Tb427-070050700	Tb427-070009500	Tb427-060008500
Tb427-100120400	Tb427-030037700	Tb427-040015600	Tb427-080009200	Tb427-060009700	Tb427-100132400
Tb427-080043300	Tb427-100011600	Tb427-100101600	Tb427-110124600	Tb427-100038800	Tb427-090052000
Tb427-110017300	Tb427-030020200	Tb427-090029200	Tb427-020008100	Tb427-110121500	Tb427-010027700
Tb427-100037100	Tb427-090085100	Tb427-110137800	Tb427-100011600	Tb427-080005100:pseudogene	Tb427-080009200
Tb427-100112000	Tb427-110027500	Tb427-050026200	Tb427-090085100	Tb427-060020800:pseudogene	Tb427-100023600
Tb427-050032600	Tb427-100095700	Tb427-030009900	Tb427-100006500	Tb427-040029900	Tb427-110042100
Tb427-110137800	Tb427-110124600	Tb427-090052000	Tb427-080050400	Tb427-030057500	Tb427-030009900
Tb427-110138200	Tb427-110184300	Tb427-020017700	Tb427-030029900	Tb427-110055100	Tb427-100033600
Tb427-030008400	Tb427-080032800	Tb427-090031800	Tb427-070068800	Tb427-110138200	Tb427-050012400
Tb427-070078000	Tb427-070042400	Tb427-080019600	Tb427-110073700	Tb427-070025800	Tb427-030048400
Tb427-100085500	Tb427-090031800	Tb427-110042100	Tb427-060055100	Tb427-100096700	Tb427-050032600
Tb427-000014500:pseudogene	Tb427-040027000	Tb427-070028500	Tb427-060043400	Tb427-100011300	Tb427-070034600
Tb427-010023900	Tb427-080009200	Tb427-100006500	Tb427-100154100	Tb427-080009200	Tb427-100011600
Tb427-050041600	Tb427-100026100	Tb427-100096900	Tb427-100076900	Tb427-070034600	Tb427-100112000
Tb427-030033600	Tb427-040040800	Tb427-070060500	Tb427-090032300	Tb427-020032100	Tb427-070060500
Tb427-020008100	Tb427-100077100	Tb427-090036700	Tb427-100011100	Tb427-030009900	Tb427-110169500
Tb427-090081800	Tb427-070067600	Tb427-110138200	Tb427-110123100	Tb427-090032300	Tb427-070058900
Tb427-110073700	Tb427-100096900	Tb427-110031800	Tb427-060055700	Tb427-030039700	Tb427-090029200
Tb427-090012800	Tb427-100101600	Tb427-100033600	Tb427-010027100	Tb427-010020500	Tb427-100096800
Tb427-100038800	Tb427-050051200	Tb427-030018300	Tb427-100096900	Tb427-110009300	Tb427-100100500
Tb427-030057200	Tb427-100027800:pseudogene	Tb427-110014200	Tb427-080070100	Tb427-040052800	Tb427-060037300
Tb427-080084800	Tb427-100096700	Tb427-100060200	Tb427-100100500	Tb427-100109200	Tb427-110121500
Tb427-060009700	Tb427-110031800	Tb427-100112000	Tb427-080088400	Tb427-070078600	Tb427-070054200
Tb427-110121500	Tb427-100140700	Tb427-100132400	Tb427-000667900	Tb427-070054200	Tb427-100011100
Tb427-030014700	Tb427-050017000	Tb427-050014700	Tb427-110158700	Tb427-040042400	Tb427-080019600
Tb427-010014500	Tb427-090061000	Tb427-100140700	Tb427-070054200	Tb427-090085100	Tb427-030018300
Tb427-100109300	Tb427-100044200	Tb427-090006600	Tb427-030020200	Tb427-100096800	Tb427-080047200
Tb427-110043300	Tb427-050026200	Tb427-070068800	Tb427-100132400	Tb427-110014200	Tb427-100101600
Tb427-110121900	Tb427-020032100	Tb427-070040800	Tb427-110028600	Tb427-070067600	Tb427-070028500
Tb427-100096900	Tb427-100151000	Tb427-100170300	Tb427-070058900	Tb427-080050400	Tb427-110121900
Tb427-100008500	Tb427-010016300	Tb427-100090100	Tb427-090080200	Tb427-090072700	Tb427-090012800
Tb427-020020500	Tb427-030029600	Tb427-100097400	Tb427-080043400	Tb427-030046000	MURF4
Tb427-070052900	Tb427-110122800	Tb427-040054600	Tb427-110145700	Tb427-100125100	Tb427-050043800
Tb427-100153300	Tb427-080042600	Tb427-110069200	12S-rRNA	Tb427-090056500	Tb427-070063700
Tb427-070027000	Tb427-040029900	Tb427-060046000	Tb427-080008900	Tb427-110027500	Tb427-030029900
Tb427-010027700	Tb427-080008900	Tb427-060025300	Tb427-070026200	Tb427-030018300	Tb427-100095100
Tb427-110124600	Tb427-010016700	Tb427-110121500	Tb427-110015000	Tb427-100007900	Tb427-060046000
Tb427-010010600	Tb427-110024600	Tb427-050043800	Tb427-090030900	Tb427-070060500	Tb427-060033600
Tb427-080022300	Tb427-090026000	Tb427-100085200	Tb427-060037300	Tb427-050041600	Tb427-080040400
Tb427-100096800	Tb427-110073800	Tb427-110082700	Tb427-100057800	Tb427-070083700:pseudogene	Tb427-100112200
Tb427-090056500	Tb427-020017800	Tb427-090044700	Tb427-060039700	Tb427-030057200	Tb427-110055200
Tb427-060008400	Tb427-080050400	Tb427-050015600	Tb427-030057500	Tb427-100008500	Tb427-100170300
Tb427-070009500	Tb427-070009500	Tb427-030043800	Tb427-060051900	Tb427-080032800	Tb427-060055100
Tb427-090089200	Tb427-100084700	Tb427-090083000	Tb427-100033600	Tb427-020032300	Tb427-080065500
Tb427-070052400	Tb427-100162700	Tb427-070058900	Tb427-100112000	Tb427-050035000	Tb427-110152700
Tb427-070083700:pseudogene	Tb427-060046000	Tb427-110121900	Tb427-090052000	Tb427-070020200	Tb427-080008900
Tb427-030029900	Tb427-090066200	Tb427-110055200	Tb427-110073800	Tb427-100101600	Tb427-080040700
Tb427-070081000	Tb427-030048400	Tb427-110124600	Tb427-110042100	Tb427-070058900	Tb427-090056500
Tb427-080043400	Tb427-080028400	Tb427-070025800	Tb427-080040700	Tb427-060033600	Tb427-070040800
Tb427-110031800	Tb427-090072700	Tb427-100084700	Tb427-100125200	Tb427-030042500	Tb427-110037700
Tb427-100107300	Tb427-100011300	Tb427-060033600	Tb427-040015000	Tb427-080029500	Tb427-040023100
Tb427-090042600	Tb427-030057500	Tb427-060037300	Tb427-090056500	Tb427-100015100	Tb427-040054600
Tb427-110092100	Tb427-100033600	Tb427-030024500	Tb427-100101500	Tb427-030038800	Tb427-050051200
Tb427-030040600	Tb427-100026700	Tb427-080009200	Tb427-030009900	Tb427-010016800	Tb427-030009000
Tb427-040015000	Tb427-080039100	Tb427-060035100	Tb427-070060500	Tb427-080027700	Tb427-020024900
Tb427-030057500	Tb427-070050400	Tb427-020027500	Tb427-110181600	Tb427-080043400	Tb427-060029800
Tb427-010016100	Tb427-080040400	Tb427-080047200	Tb427-100095100	Tb427-100095700	Tb427-100090100
Tb427-110023600	Tb427-040021600	Tb427-020006900	Tb427-110121500	Tb427-060037300	Tb427-090080200
Tb427-040027900	Tb427-000481200:pseudogene	Tb427-090049200	Tb427-080047200	Tb427-100120400	Tb427-050017000
Tb427-050052200	Tb427-040017700	Tb427-050017000	Tb427-100023600	Tb427-100096100	Tb427-070067600
Tb427-110033500	Tb427-100057800	Tb427-020024900	Tb427-050034300	Tb427-040021100	Tb427-030057500
Tb427-060029800	Tb427-040052800	Tb427-100162100	Tb427-050051200	Tb427-110016000	Tb427-100096700
Tb427-080048100	Tb427-110145700	Tb427-100011600	Tb427-040023100	Tb427-110184300	Tb427-060039700
Tb427-010020100	Tb427-070054200	Tb427-060017600	Tb427-070031100	Tb427-100090100	Tb427-090006600
Tb427-080010100	Tb427-110028600	Tb427-110167700	Tb427-070063700	Tb427-070068300	Tb427-080088400
Tb427-110016000	Tb427-110138100	Tb427-100100500	Tb427-050012400	Tb427-110092100	Tb427-100036400
Tb427-090032300	Tb427-090058200	Tb427-070045100	Tb427-070050100	Tb427-100054700	Tb427-100097400
Tb427-090042300	Tb427-060009700	Tb427-100054800:pseudogene	Tb427-110184300	Tb427-060011000	Tb427-070031100
Tb427-040005700	Tb427-030039700	Tb427-070063700	Tb427-040027000	Tb427-110047000	Tb427-110021800
Tb427-110125400	Tb427-050031100	Tb427-070034600	Tb427-010016100	Tb427-110121900	Tb427-080039100
Tb427-040029900	Tb427-090032300	Tb427-070054200	Tb427-030037700	Tb427-040020000	Tb427-060009700
Tb427-030039700	Tb427-100038800	Tb427-110021800	Tb427-100112200	Tb427-100012000	Tb427-110082700
Tb427-030018300	Tb427-110029200	Tb427-090034500	Tb427-110122800	Tb427-100161200	Tb427-110185100
Tb427-080013800	Tb427-100085500	Tb427-100108200	Tb427-110169500	Tb427-030015300	Tb427-050010800
Tb427-100011300	Tb427-100096100	Tb427-070018400	Tb427-110037700	Tb427-030042200	Tb427-110069200
Tb427-000015400	Tb427-110121500	Tb427-100112200	Tb427-080065500	Tb427-040027000	Tb427-060017600
Tb427-070072900	Tb427-110169500	Tb427-070045300	Tb427-090029200	Tb427-100074000	Tb427-020008000
Tb427-070078600	Tb427-070078200	Tb427-010010600	Tb427-010014500	Tb427-060015800	Tb427-020006900
Tb427-110021800	Tb427-060011500	Tb427-080065500	Tb427-110121900	Tb427-110069200	Tb427-110022700
Tb427-110038900	Tb427-100160400	Tb427-100095100	Tb427-080035400	Tb427-050038600	Tb427-110144100
Tb427-080029500	Tb427-100057700	Tb427-100011100	Tb427-070067600	Tb427-100140700	Tb427-010014500
Tb427-100054700	Tb427-050039000	Tb427-050032600	Tb427-100096800	Tb427-070078400	Tb427-110023600
Tb427-110069200	Tb427-070078600	Tb427-030048400	Tb427-100108700	Tb427-080017800	Tb427-100162100
Tb427-100114600:pseudogene	Tb427-020011600	Tb427-110037700	Tb427-010027700	Tb427-080072100	Tb427-100037000
Tb427-080020700	Tb427-070022200	Tb427-110067200	Tb427-080010100	Tb427-100056300	Tb427-040026500
Tb427-110047000	Tb427-080019600	Tb427-100096700	Tb427-100036400	Tb427-110038900	Tb427-100101500
Tb427-040052800	Tb427-050035000	Tb427-060029800	Tb427-060008600:pseudogene	Tb427-100119900	Tb427-030050500
Tb427-100103000	Tb427-020007800	Tb427-050010800	Tb427-080019600	Tb427-070010100	Tb427-070018400
Tb427-110015000	Tb427-110120900	Tb427-100128700	Tb427-040042400	Tb427-110151500	Tb427-100105200
Tb427-000014200	Tb427-080072100	Tb427-060008500	Tb427-060033600	Tb427-060031500	Tb427-110017900
Tb427-100007900	Tb427-090036100	Tb427-100037000	Tb427-060029800	Tb427-070078200	Tb427-010016100
Tb427-060011600	Tb427-020032300	Tb427-080043300	Tb427-030018300	Tb427-000015600:pseudogene	Tb427-020027500
Tb427-070060500	Tb427-070067500	Tb427-050013100	Tb427-050043800	Tb427-010016100	Tb427-100108200
Tb427-100112200	Tb427-030016000	Tb427-110144100	Tb427-100048300	Tb427-060044500	Tb427-080088800
Tb427-110150100	Tb427-010012000	Tb427-070032300	Tb427-060009700	Tb427-060011500	Tb427-030049000
Tb427-100027900	Tb427-100161700	Tb427-040026500	Tb427-080039100	Tb427-050007600:pseudogene	Tb427-060035100
ND7	Tb427-040052400	Tb427-100096600	Tb427-080084500	Tb427-080049400	Tb427-090086800:pseudogene
Tb427-060037300	Tb427-040009000	Tb427-040023100	Tb427-010015100	Tb427-070079100	Tb427-110022600
Tb427-070054200	Tb427-040050400	Tb427-050051200	Tb427-050022300	Tb427-040040800	Tb427-090044700
Tb427-000655300:pseudogene	Tb427-100162100	Tb427-020011800	Tb427-020008000	Tb427-060014500	Tb427-100016600:pseudogene
Tb427-110106100	Tb427-060051900	Tb427-110023600	Tb427-080048100	Tb427-070078000	Tb427-010030000
Tb427-040021100	Tb427-020021800	Tb427-010030000	Tb427-110055200	Tb427-110138100	Tb427-080084500
Tb427-100096700	Tb427-080005100:pseudogene	Tb427-090068200	Tb427-100063200	Tb427-070016200	Tb427-090090300
Tb427-070020200	Tb427-020015800	Tb427-030057200	Tb427-060046000	Tb427-030034800	Tb427-060043400
Tb427-020032100	Tb427-100090100	Tb427-070049900	Tb427-090042600	Tb427-100102600	Tb427-110123300
Tb427-090006600	Tb427-110138200	Tb427-090056500	Tb427-100133900:pseudogene	Tb427-080030800	Tb427-100054800:pseudogene
Tb427-070014700	Tb427-000110300	Tb427-030007100	Tb427-070050400	Tb427-100040900	Tb427-090049200
Tb427-010022300	Tb427-060036800	Tb427-110178000	Tb427-070028500	Tb427-100008200	Tb427-030057200
Tb427-080007300	Tb427-100032500	Tb427-080040700	Tb427-080029600	Tb427-110031600	Tb427-110070500
Tb427-060020800:pseudogene	Tb427-070058900	Tb427-110032400	Tb427-100096700	Tb427-040027900	Tb427-110014200
Tb427-020027500	Tb427-110047300	Tb427-110067000	Tb427-040029900	Tb427-080047200	Tb427-070049900
Tb427-030019200	Tb427-030042500	Tb427-070067600	Tb427-020024900	Tb427-020019200	Tb427-070052900
Tb427-080073900	Tb427-050010800	Tb427-090089900	Tb427-100105200	Tb427-050031100	Tb427-040017700
Tb427-040023500	Tb427-110010500	Tb427-080088800	Tb427-100101600	Tb427-090076200	Tb427-050021300
Tb427-080009200	Tb427-100127700	Tb427-060013500	Tb427-100151000	Tb427-100042600	Tb427-110166800
Tb427-060018200	Tb427-080040800	Tb427-110075000	Tb427-050052600	Tb427-100157500	Tb427-040029900
Tb427-100042600	Tb427-100076200	Tb427-090090300	Tb427-080048200	Tb427-020015800	Tb427-020016800
Tb427-110188000	Tb427-110151600	Tb427-110124500	Tb427-010012000	Tb427-080035400	Tb427-080035100
Tb427-110181600	Tb427-100007900	Tb427-110022600	Tb427-070076600	Tb427-100134100	Tb427-100128700
Tb427-030007100	Tb427-070068300	Tb427-080039100	Tb427-080007300	Tb427-020030300	Tb427-040040800
Tb427-110056400	Tb427-100016600:pseudogene	Tb427-100036400	Tb427-100170300	Tb427-050021300	Tb427-070076600
Tb427-040022300	Tb427-060052900	Tb427-110123300	Tb427-040021100	Tb427-070067500	Tb427-100153700:pseudogene
Tb427-070018400	Tb427-050006200	Tb427-080008900	Tb427-050021300	Tb427-090070700	Tb427-050013100
Tb427-040011900	Tb427-110124700	Tb427-060009700	Tb427-110022700	Tb427-000730800	Tb427-110124500
Tb427-100055700:pseudogene	Tb427-070016200	Tb427-110022700	Tb427-110017900	Tb427-020007800	Tb427-100064300
Tb427-020017700	Tb427-110178000	Tb427-110031000	Tb427-030050500	Tb427-010020100	Tb427-050052600
Tb427-100119900	Tb427-110143700	Tb427-040040800	Tb427-030054300	Tb427-020013700	Tb427-090021500
Tb427-080069100	Tb427-020021300	Tb427-030029900	Tb427-040054600	Tb427-090068100	Tb427-100084700
Tb427-060033600	Tb427-100012000	Tb427-080068100	Tb427-100133300	Tb427-110055200	Tb427-070050400
Tb427-090030900	Tb427-030018300	Tb427-110055400	Tb427-070040800	Tb427-100083300	Tb427-100083900
Tb427-070068800	Tb427-100132600	Tb427-090012800	Tb427-100095000	Tb427-110145700	Tb427-070042400
Tb427-060010300	Tb427-070060500	Tb427-110017500	Tb427-050017000	Tb427-100126900	Tb427-040040500
Tb427-090089700	Tb427-040014200	Tb427-090086800:pseudogene	Tb427-100160400	Tb427-100032500	Tb427-100122100
Tb427-090072700	Tb427-090075800	Tb427-110094400	Tb427-060015800	Tb427-040028400	Tb427-050022300
Tb427-110046200	Tb427-090062400	Tb427-090009100	Tb427-070020200	Tb427-090055100	Tb427-090089900
Tb427-100077400	Tb427-080005500	Tb427-030049000	Tb427-050010800	Tb427-090089000	Tb427-110164800
Tb427-030038800	Tb427-070034600	Tb427-100016600:pseudogene	Tb427-100122100	Tb427-070018400	Tb427-070028400
Tb427-040029500	Tb427-100048100:pseudogene	Tb427-030050500	Tb427-100134800	Tb427-000109000	Tb427-080068100
Tb427-090007300	Tb427-100096800	Tb427-080035100	Tb427-110021800	Tb427-070038600	Tb427-110092100
Tb427-110151500	Tb427-080077100	Tb427-020008000	MURF4	Tb427-080040700	Tb427-070045300
Tb427-080050400	Tb427-110055100	Tb427-070039400	Tb427-100153700:pseudogene	Tb427-100049900	Tb427-010025100
Tb427-080027700	Tb427-100015100	Tb427-080073900	Tb427-060020800:pseudogene	Tb427-090025000	Tb427-080072900
Tb427-010012500	Tb427-100083300	Tb427-060055100	Tb427-020016800	Tb427-040014200	Tb427-030043800
Tb427-030054300	Tb427-110073000	Tb427-090039700	Tb427-100143800	Tb427-080042900	Tb427-070078400
Tb427-080049400	Tb427-040009600	Tb427-060009500	Tb427-030049000	Tb427-070072800	Tb427-110145700
Tb427-040023100	Tb427-000014700	Tb427-070031100	Tb427-090090100	Tb427-050048000	Tb427-080073900
Tb427-110082500	Tb427-010011700	Tb427-110017900	Tb427-050025800	Tb427-100027800:pseudogene	Tb427-060011000
Tb427-030019100	Tb427-090056500	Tb427-090021500	Tb427-090086800:pseudogene	Tb427-050038000	Tb427-100131800
Tb427-110009100	Tb427-040055000	Tb427-050007500:pseudogene	Tb427-110031600	Tb427-050010800	Tb427-100135200:pseudogene
Tb427-060047500	Tb427-110132200	Tb427-040040500	Tb427-100090100	Tb427-090074800	Tb427-080066400
Tb427-050038600	Tb427-030034800	Tb427-090080200	Tb427-110023600	Tb427-050010200	Tb427-100095700
Tb427-030009900	Tb427-040020000	Tb427-030057500	Tb427-070051200	Tb427-070045300	Tb427-110167700
Tb427-110037700	Tb427-050021300	Tb427-100105200	Tb427-100011300	Tb427-090013700	Tb427-040023500
Tb427-080077400	Tb427-100037000	Tb427-080013800	Tb427-080049400	Tb427-030028800	Tb427-030030800
Tb427-100096600	Tb427-000174400:pseudogene	Tb427-100149600	Tb427-110144100	Tb427-030024300	Tb427-000481500
Tb427-080017800	Tb427-060033600	Tb427-110070500	Tb427-070052900	Tb427-010022700	Tb427-030042500
Tb427-060037500	Tb427-070078400	Tb427-070080800	Tb427-060030400	Tb427-010016300	Tb427-070008300
Tb427-100015100	Tb427-000516500:pseudogene	Tb427-110039500	Tb427-100161700	Tb427-060038100	Tb427-060011500
Tb427-030042200	Tb427-010020500	Tb427-040017700	Tb427-070072300	Tb427-010025100	Tb427-090061000
Tb427-100072500	Tb427-100010600	Tb427-070036500	Tb427-100064300	Tb427-070081000	Tb427-110151500
Tb427-100040900	Tb427-030049000	Tb427-060039700	Tb427-100016600:pseudogene	Tb427-040021400	Tb427-090059900
Tb427-020019500	Tb427-060031500	Tb427-110134200	Tb427-040026500	Tb427-050039000	Tb427-090089700
Tb427-080006300	Tb427-070069100	Tb427-100025200	Tb427-100037000	Tb427-100076200	Tb427-080084800
Tb427-070067600	Tb427-070038600	Tb427-070027000	Tb427-110022600	Tb427-110089800	Tb427-110061500
Tb427-100043200	Tb427-030038800	Tb427-000014500:pseudogene	Tb427-080088800	Tb427-050010900	Tb427-110143700
Tb427-080046900	Tb427-070063200	Tb427-090013700	Tb427-100064700	Tb427-030058600	Tb427-030054300
Tb427-100074000	Tb427-110032800	Tb427-100078600	Tb427-110070500	Tb427-100170300	Tb427-110055400
Tb427-090085100	Tb427-060044500	Tb427-100095700	Tb427-100157800	Tb427-070006700	Tb427-020020100
Tb427-000017700	Tb427-090061700	Tb427-110016700	Tb427-100127800	Tb427-110095000	Tb427-090089000
Tb427-070058900	Tb427-080061400	Tb427-100006100	Tb427-020011600	Tb427-020008000	Tb427-060018300
Tb427-020032300	Tb427-080035000	Tb427-010028200	Tb427-090072700	Tb427-080035000	Tb427-100060200
Tb427-050029400	Tb427-090086800:pseudogene	Tb427-010014500	Tb427-070081000	Tb427-110064200	Tb427-050031400
Tb427-100109200	Tb427-070020200	Tb427-110085600	Tb427-110166800	Tb427-070063400	Tb427-050022900
Tb427-080047200	Tb427-050009100	Tb427-070058700	Tb427-110152700	Tb427-110085800	Tb427-080066600
Tb427-000285400:pseudogene	Tb427-070079600	Tb427-030039700	Tb427-060017600	Tb427-060039200	Tb427-060032700
Tb427-050035000	Tb427-060011000	Tb427-070025700	Tb427-100097400	Tb427-070025300	Tb427-050050900
Tb427-070025800	Tb427-080042900	Tb427-080032800	Tb427-090006600	Tb427-110072300	Tb427-030041100
Tb427-110009300	Tb427-080027700	Tb427-110138400	Tb427-070078200	Tb427-070069100	Tb427-070051300
Tb427-030042500	Tb427-100126900	Tb427-100125800	Tb427-110163900	Tb427-080058400	Tb427-050025500
Tb427-080085800	Tb427-110014200	Tb427-080077100	Tb427-040006200	Tb427-100164500	Tb427-070025700
Tb427-060015800	Tb427-090077000	Tb427-080069500	Tb427-110082700	Tb427-030029600	Tb427-000014500:pseudogene
Tb427-110097900	Tb427-110044700	Tb427-070028400	Tb427-090080100	Tb427-090089900	Tb427-050015500
Tb427-050044900	Tb427-070010100	Tb427-080088400	Tb427-010012500	Tb427-070062500	Tb427-100100900
Tb427-100146000	Tb427-110098500	Tb427-040037500	Tb427-110123300	Tb427-100104100	Tb427-040054500
Tb427-020019200	Tb427-110164000	Tb427-030028500	Tb427-090090300	Tb427-110122200	Tb427-090011700
Tb427-070079100	Tb427-050037200	Tb427-100019800	Tb427-030042500	Tb427-110164000	Tb427-070079100
Tb427-000015500	Tb427-030015300	Tb427-090089000	Tb427-110037900	Tb427-010011500	Tb427-010012500
Tb427-030030800	Tb427-110085800	Tb427-000075100	Tb427-020006900	Tb427-060008300	Tb427-070006700
Tb427-060011000	Tb427-090037700	Tb427-110048600	Tb427-070018400	Tb427-080019800	Tb427-110072300
Tb427-030023900	Tb427-110140500	Tb427-110169200	Tb427-110069200	Tb427-010010800	Tb427-100012600
Tb427-020013700	Tb427-110058100	Tb427-100083900	Tb427-100162100	Tb427-050037200	Tb427-000819000:pseudogene
Tb427-100149800	Tb427-110173500	Tb427-080066400	Tb427-080040400	Tb427-100087100	Tb427-040009600
Tb427-030015300	Tb427-030030600	Tb427-070042400	Tb427-030009000	Tb427-080024500	Tb427-100012000
Tb427-070082800	Tb427-000516300:pseudogene	Tb427-110166800	Tb427-100136700	Tb427-080042400	Tb427-100102400
Tb427-030017200	Tb427-100106700	Tb427-100164500	Tb427-020019800	Tb427-020029800	Tb427-110026900
Tb427-110027500	Tb427-020019800	Tb427-110039600	Tb427-080066600	Tb427-090081300	Tb427-100044300
Tb427-070036300	Tb427-110033300	Tb427-110085200	Tb427-110017300	Tb427-060045400	Tb427-110005600
Tb427-080035100	Tb427-070083700:pseudogene	Tb427-110181700	Tb427-010030000	Tb427-030024500	Tb427-000804200:pseudogene
Tb427-110181700	Tb427-100157500	Tb427-000481500	Tb427-060018300	Tb427-070008300	Tb427-070063900
Tb427-030055400	Tb427-060054900	Tb427-110164800	Tb427-050037500	Tb427-080039100	Tb427-110019500
Tb427-050045100	Tb427-080024500	Tb427-100017300	Tb427-040017700	Tb427-020024900	Tb427-100165000
Tb427-060018300	Tb427-110082300	Tb427-070052900	Tb427-040030500:pseudogene	Tb427-080046300	Tb427-090070900
Tb427-040025600	Tb427-100056300	Tb427-080084500	Tb427-080006300	Tb427-070042400	Tb427-080029500
Tb427-060014500	Tb427-030046000	Tb427-100084000	Tb427-100108200	Tb427-080083100	Tb427-050034400
Tb427-090025200	Tb427-100015600	Tb427-100101500	Tb427-000110300	Tb427-110058100	Tb427-070067500
Tb427-080073800	Tb427-090090100	Tb427-010016100	Tb427-110043300	Tb427-030007000	Tb427-110051100
Tb427-100088900	Tb427-110042600	Tb427-110072300	Tb427-100012000	Tb427-050006200	Tb427-070062300
Tb427-100170300	Tb427-110065700	Tb427-100072900	Tb427-020008700	Tb427-110080800	Tb427-010015100
Tb427-090083700	Tb427-090088700	Tb427-110005600	Tb427-030032200:pseudogene	Tb427-010028700	Tb427-100025200
Tb427-090053500	Tb427-040036000	Tb427-110050200	Tb427-060039900	Tb427-100132600	Tb427-110103400
Tb427-070021300	Tb427-080058300	Tb427-070078400	Tb427-000819000:pseudogene	Tb427-100129600	Tb427-100136700
Tb427-070038300	Tb427-100134100	Tb427-100135200:pseudogene	Tb427-030057200	Tb427-100099600	Tb427-100096600
Tb427-030009700	Tb427-100068500	Tb427-030050600	Tb427-070009600	Tb427-050017000	Tb427-110052800
Tb427-100077800	Tb427-080025300	Tb427-030032600	Tb427-110092100	Tb427-110164700	Tb427-110185200
Tb427-080041200	Tb427-100008500	Tb427-030053000	Tb427-010025100	Tb427-030055500	Tb427-110017500
Tb427-090052500	Tb427-050007600:pseudogene	Tb427-060012400	Tb427-060011500	Tb427-010029600	Tb427-090039700
Tb427-030050500	Tb427-080030800	Tb427-090089700	Tb427-110060200	Tb427-100103000	Tb427-100049900
Tb427-000109000	Tb427-080029500	Tb427-100100400	Tb427-100131800	Tb427-110064300	Tb427-110128700
Tb427-040020000	Tb427-050041600	Tb427-080039300	Tb427-090061000	Tb427-100099800	Tb427-110073900
Tb427-090072000	Tb427-060015800	Tb427-080078700	Tb427-020027500	Tb427-090089200	Tb427-040049700
Tb427-040040500	Tb427-090080600	Tb427-090055200	Tb427-110051100	Tb427-100168800	Tb427-080078700
Tb427-110029900	Tb427-000730800	Tb427-110038800	Tb427-060011000	Tb427-040009600	Tb427-060035700
Tb427-070062500	Tb427-050050200:pseudogene	Tb427-090049900	Tb427-070062300	Tb427-100035500	Tb427-070073300
Tb427-050048000	Tb427-030057200	Tb427-030041100	Tb427-060032700	Tb427-040025600	Tb427-110122800
Tb427-060018900	Tb427-050020900	Tb427-110052800	Tb427-000636500:pseudogene	Tb427-090058200	Tb427-090085200
Tb427-110075000	Tb427-100139200	Tb427-100044300	Tb427-060035100	Tb427-100043200	Tb427-030012800
Tb427-080029800	Tb427-030042200	Tb427-020016800	Tb427-080046900	Tb427-080077000	Tb427-100149600
Tb427-110131600	Tb427-060038000	Tb427-110038000	Tb427-110133400	Tb427-000497700	Tb427-000831900:pseudogene
Tb427-090062300	Tb427-080044600	Tb427-040051900	Tb427-050039000	Tb427-110022600	Tb427-110138100
Tb427-100084900	Tb427-070072800	Tb427-070073300	Tb427-070049900	Tb427-000015400	Tb427-040030500:pseudogene
Tb427-030044900	Tb427-100104600	Tb427-110185100	Tb427-110130200	Tb427-100101500	Tb427-040042800
Tb427-100056300	Tb427-110124100	Tb427-110092100	Tb427-110164800	Tb427-110037700	Tb427-110087400:pseudogene
Tb427-060029400	Tb427-100074000	Tb427-000655300:pseudogene	Tb427-110055100	Tb427-090015100	Tb427-070020200
Tb427-040042400	Tb427-060016200	Tb427-100015700	Tb427-070042400	Tb427-110088300	Tb427-070036500
Tb427-090046900	Tb427-110164500:pseudogene	Tb427-070062500	Tb427-100083900	Tb427-100096600	Tb427-100095000
Tb427-080040700	Tb427-030024300	Tb427-110143700	Tb427-020007800	Tb427-080056800	Tb427-090028700
Tb427-070046800	Tb427-060037300	Tb427-010025100	Tb427-090044800	Tb427-090088700	Tb427-040005700
Tb427-000015600:pseudogene	Tb427-050037700	Tb427-100102400	Tb427-070008300	Tb427-080026500	Tb427-070072300
Tb427-070068300	Tb427-090074800	Tb427-040031700	Tb427-100054800:pseudogene	Tb427-030030800	Tb427-110064300
Tb427-070006700	Tb427-090059900	Tb427-110085700	Tb427-090059900	Tb427-100036100	Tb427-090055600
Tb427-080064400	Tb427-000015600:pseudogene	Tb427-060055500	Tb427-080035100	Tb427-030048400	Tb427-110178000
Tb427-100012000	Tb427-110055200	Tb427-110067800	Tb427-090058200	Tb427-100065500	Tb427-110019200
Tb427-080032800	Tb427-070062200	Tb427-050021300	Tb427-060019100	Tb427-090006600	Tb427-070025200
Tb427-100125100	Tb427-050024500	Tb427-020019300	Tb427-060035500	Tb427-090047300	Tb427-050010900
Tb427-090012600	Tb427-020008700	Tb427-100153200	Tb427-090044700	Tb427-060038500	Tb427-090013700
Tb427-110064200	Tb427-040021100	Tb427-100163000	Tb427-030030800	Tb427-090083700	Tb427-110167000
Tb427-040009800	Tb427-090082500	Tb427-100100900	Tb427-070032700	Tb427-070063900	Tb427-070049100
Tb427-110124400	Tb427-060008500	Tb427-060011000	Tb427-050031400	Tb427-040053600	Tb427-110037600
Tb427-080084600	Tb427-080008600	Tb427-040005400	Tb427-070078400	Tb427-000673600:pseudogene	Tb427-040009000
Tb427-100100300	Tb427-010011500	Tb427-040023500	Tb427-040023500	Tb427-100023500:pseudogene	Tb427-060015800
Tb427-100090100	Tb427-070025200	Tb427-070067500	Tb427-110167100	Tb427-060011600	Tb427-100168700
Tb427-090086600	Tb427-080046300	Tb427-070063900	Tb427-070028400	Tb427-090075800	Tb427-030027100
Tb427-090076200	Tb427-110089000	Tb427-100131800	Tb427-040030600	Tb427-010014200	Tb427-080007300
Tb427-000276400	Tb427-100136200	Tb427-090011700	Tb427-090024400	Tb427-060038000	Tb427-110031900
Tb427-090070700	Tb427-110007100	Tb427-100064300	Tb427-090049200	Tb427-030016000	Tb427-110006900
Tb427-020009900	Tb427-050038600	Tb427-090040700	Tb427-060056000	Tb427-110028600	Tb427-030051700
Tb427-110063600	Tb427-100099800	Tb427-040029900	Tb427-080017600	Tb427-110106100	Tb427-100164500
Tb427-070010100	Tb427-100133300	Tb427-100049900	Tb427-070026100	Tb427-090006900	Tb427-100099600
Tb427-020030300	Tb427-030058600	Tb427-070064000	Tb427-110183100	Tb427-110061700	Tb427-100140400
Tb427-100101600	Tb427-040019900	Tb427-030030800	Tb427-110151500	Tb427-060038300	Tb427-100144300
Tb427-110155100	Tb427-110100600	Tb427-100153700:pseudogene	Tb427-010014300	Tb427-070078300	Tb427-110167300
Tb427-110164800	Tb427-100008200	Tb427-110073900	Tb427-040040800	Tb427-000107400	Tb427-100026200
Tb427-070045300	Tb427-080027000	Tb427-110186200	Tb427-080084800	Tb427-040040500	Tb427-040056300
Tb427-050015500	Tb427-040038200	Tb427-020025700	Tb427-090046700	Tb427-080080900	Tb427-100157500
Tb427-030029700	Tb427-090070000	Tb427-020020600	Tb427-000285400:pseudogene	Tb427-030020400	Tb427-090085500
Tb427-010016200	Tb427-030028800	Tb427-050025500	Tb427-070076900	Tb427-100125200	Tb427-070010600
Tb427-100096100	Tb427-050030400	Tb427-100054700	Tb427-080028400	Tb427-060056400	Tb427-000285400:pseudogene
Tb427-100049900	Tb427-110100200	Tb427-020005300	Tb427-050022900	Tb427-110013600	Tb427-050038500
Tb427-030015800	Tb427-110005500	Tb427-110061500	Tb427-040049700	Tb427-040054500	Tb427-100151000
Tb427-110031600	Tb427-090089000	Tb427-010022700	Tb427-070025400	Tb427-040040700	Tb427-030017200
Tb427-020008000	Tb427-110120200	Tb427-060053000	Tb427-010013500	Tb427-110059300	Tb427-110180800
Tb427-110095000	Tb427-040022400	Tb427-070076600	Tb427-030042700	Tb427-080005400:pseudogene	Tb427-100135000
Tb427-110089400	Tb427-100152000	Tb427-110026900	Tb427-090021500	Tb427-070077700	Tb427-090062000
Tb427-080016300:pseudogene	Tb427-080043400	Tb427-030056500	Tb427-020020100	Tb427-080036800	Tb427-080029800
Tb427-050016600	Tb427-040028400	Tb427-100101100	Tb427-100135200:pseudogene	Tb427-100067700	Tb427-110094400
Tb427-070078400	Tb427-050032100	Tb427-040018300	Tb427-060007000:pseudogene	Tb427-090029200	Tb427-090042600
Tb427-100052400	Tb427-080017800	Tb427-100136000	Tb427-070059100	Tb427-090070900	Tb427-100019800
Tb427-010024700	Tb427-060011400:pseudogene	Tb427-100144300	Tb427-090070900	Tb427-100068300	Tb427-040054900
Tb427-090030600	Tb427-110047000	Tb427-060039500	Tb427-040040500	Tb427-110013900	Tb427-010012000
Tb427-110157200	Tb427-060038200	Tb427-050031800	Tb427-100077100	Tb427-070076600	Tb427-030042400
Tb427-030022900	Tb427-100054700	Tb427-050050900	Tb427-040056300	Tb427-070059400:pseudogene	Tb427-080009600
ND5	Tb427-110016000	Tb427-110103400	Tb427-080018300	Tb427-110119800	Tb427-050026300
Tb427-050008900	Tb427-080035400	Tb427-110151500	Tb427-100027600	Tb427-000017700	Tb427-080049400
Tb427-090068100	Tb427-110164400	Tb427-100078900	Tb427-100168700	Tb427-100036400	Tb427-100055300
Tb427-090083800	Tb427-110189800	Tb427-110159900	Tb427-110061500	Tb427-000485800	Tb427-110032500
Tb427-040056300	Tb427-070073000	Tb427-100022200	Tb427-070031300	Tb427-100010100	Tb427-110028900
Tb427-110085600	Tb427-100081600	Tb427-040043500	Tb427-090076200	Tb427-110073900	Tb427-040010400
Tb427-110164700	Tb427-110164300	Tb427-080046600	Tb427-090065700	Tb427-110046300	Tb427-080024900
Tb427-040048400	Tb427-030009300	Tb427-100080800	Tb427-110099500	Tb427-020024000	Tb427-010010000
Tb427-100023500:pseudogene	Tb427-070059100	Tb427-080084800	Tb427-100043200	Tb427-030009700	Tb427-020011800
Tb427-050007600:pseudogene	Tb427-090025000	Tb427-060043400	Tb427-110124500	Tb427-090062100	Tb427-090076600
Tb427-010024600	Tb427-030042400	Tb427-060035700	Tb427-070051300	Tb427-040054300	Tb427-070079600
Tb427-060031500	Tb427-110061700	Tb427-100122100	Tb427-060011700	Tb427-100040600	Tb427-090058700
Tb427-080083300	Tb427-000500400	Tb427-070008300	Tb427-100128700	Tb427-110082500	Tb427-030009700
Tb427-100008200	Tb427-070041100	Tb427-010032000	Tb427-100163200	Tb427-090037000	Tb427-070047300
Tb427-050010100	Tb427-110122100	Tb427-100099600	Tb427-080066400	Tb427-100011600	Tb427-110151200
Tb427-110145900	Tb427-100060700	Tb427-110180900	Tb427-090084400	Tb427-080019000	Tb427-100140300
Tb427-080019800	Tb427-110024500	Tb427-110089800	Tb427-060039100	Tb427-060034500	Tb427-100036200
Tb427-050034900	Tb427-110043900	Tb427-110028900	Tb427-080072300	Tb427-070027500	Tb427-100101100
Tb427-030020800	Tb427-070056400	Tb427-110085800	Tb427-070078300	Tb427-000173900	Tb427-080020500
Tb427-050017400	Tb427-010013500	Tb427-000730800	Tb427-040054500	Tb427-080057100	Tb427-080048100
Tb427-100099600	Tb427-060038300	Tb427-040009600	Tb427-070076700	Tb427-050031800	Tb427-030034800
Tb427-110042700	Tb427-110093400	Tb427-050052600	Tb427-070006700	Tb427-080072000	Tb427-110182500
Tb427-110022600	Tb427-100020100	Tb427-090085200	Tb427-040030900	Tb427-100143800	Tb427-060038300
Tb427-100007700	Tb427-030026900	Tb427-000015300	Tb427-050007600:pseudogene	Tb427-070047600	Tb427-110106400
Tb427-020029800	Tb427-110031600	Tb427-050010900	Tb427-110087400:pseudogene	Tb427-060032700	Tb427-090075800
Tb427-070049200	Tb427-110151500	Tb427-030009700	Tb427-110154700	Tb427-050052200	Tb427-100053700
Tb427-100097400	Tb427-110092100	Tb427-100050600	Tb427-110014200	Tb427-080081400	Tb427-080042300
Tb427-110128700	Tb427-090008000	Tb427-090059900	Tb427-080068100	Tb427-110144100	Tb427-090083800
Tb427-100129400	Tb427-070049100	Tb427-100085800	Tb427-000481500	Tb427-060016500	Tb427-100135800
Tb427-020024900	Tb427-030018700	Tb427-080049600	Tb427-050013100	Tb427-080008600	Tb427-060046500
Tb427-070068600	Tb427-100119900	Tb427-100050100:pseudogene	Tb427-030012800	Tb427-050013300	Tb427-100040600
Tb427-070030900	Tb427-110099600	Tb427-090087600	Tb427-110081000	Tb427-110056400	Tb427-030038100
Tb427-110070700	Tb427-030043300	Tb427-020020100	Tb427-050031200	Tb427-040018800	Tb427-080008800
Tb427-100143800	Tb427-050043800	Tb427-040040100	Tb427-040005700	Tb427-090044500:pseudogene	Tb427-100169100
Tb427-040009700	Tb427-010016800	Tb427-090030600	Tb427-030055500	Tb427-060015300	Tb427-110010700
Tb427-080053700	Tb427-010025100	Tb427-050015500	Tb427-050033700	Tb427-110061800	Tb427-050031200
Tb427-090055100	Tb427-110069200	Tb427-040054300	Tb427-080038600	Tb427-100151000	Tb427-080047400
Tb427-070032300	Tb427-090029900	Tb427-070050400	Tb427-090089900	Tb427-110024500	Tb427-030042100
Tb427-080042400	Tb427-070044300	Tb427-070010600	Tb427-100145700	Tb427-070068800	Tb427-110138400
Tb427-070063400	Tb427-100129600	Tb427-090058700	Tb427-050015500	Tb427-110044800	Tb427-050037100
Tb427-060009500	Tb427-030024500	Tb427-080066200	Tb427-110143700	Tb427-100136000	Tb427-050030100
Tb427-030032800	Tb427-110119800	Tb427-090061000	Tb427-080073900	Tb427-060037100	Tb427-110108000
Tb427-100095700	Tb427-080005800	Tb427-100012600	Tb427-030039100	Tb427-100109800	Tb427-080023300
Tb427-070028900	Tb427-090020200	Tb427-110167000	Tb427-070079100	Tb427-110024200	Tb427-090084400
Tb427-060044500	Tb427-100053100	Tb427-060011500	Tb427-100027500	Tb427-060036800	Tb427-110045100
Tb427-090050800	Tb427-060014500	Tb427-070051300	Tb427-100095700	Tb427-100131800	Tb427-000655300:pseudogene
Tb427-040054600	Tb427-020021500	Tb427-100164200	Tb427-080008600	Tb427-110047300	Tb427-110099500
Tb427-110059300	Tb427-100084000	Tb427-040012500	Tb427-030017200	Tb427-040043800	Tb427-040029000
Tb427-030032200:pseudogene	Tb427-070079100	Tb427-110128700	Tb427-110098500	Tb427-100097400	Tb427-040012500
Tb427-110050200	Tb427-030016800	Tb427-070017500	Tb427-100165000	Tb427-110067700	Tb427-100084500
Tb427-020022600	Tb427-080056800	Tb427-050022300	Tb427-110018400	Tb427-000516300:pseudogene	Tb427-100039900
Tb427-100104400	Tb427-030033200	Tb427-040013500	Tb427-060035300	Tb427-070008600	Tb427-110142800
Tb427-080030800	Tb427-100120400	Tb427-050022900	Tb427-090089700	Tb427-000578700:pseudogene	Tb427-100123700
Tb427-100113400	Tb427-100100000	Tb427-100109800	Tb427-040014600	Tb427-110173300	Tb427-020019400
Tb427-090086400:pseudogene	Tb427-040006100	Tb427-030042500	Tb427-050050900	Tb427-080079300:pseudogene	Tb427-090046500:pseudogene
Tb427-080054000	Tb427-070078300	Tb427-010011500	Tb427-110019500	Tb427-040022300	Tb427-090087000
Tb427-050031200	Tb427-000173900	Tb427-070079100	Tb427-100055700:pseudogene	Tb427-070062200	Tb427-100147900
Tb427-080072000	Tb427-040006400	Tb427-080030600	Tb427-100036200	Tb427-110022400	Tb427-100090200
Tb427-110184300	Tb427-110121900	Tb427-100098300	Tb427-090039900	Tb427-060046200	Tb427-060041500
Tb427-050038000	Tb427-080069900	Tb427-100050800	Tb427-110019200	Tb427-080058500	Tb427-090088700
Tb427-030007000	Tb427-040021000	Tb427-110047300	Tb427-050034400	Tb427-100016600:pseudogene	Tb427-050026900
Tb427-100127000	Tb427-110155200	Tb427-000804200:pseudogene	Tb427-100038800	Tb427-070049900	Tb427-060035000
Tb427-070016100	Tb427-000516000:pseudogene	Tb427-080061300	Tb427-070077600	Tb427-020015600	Tb427-100055200
Tb427-080072100	Tb427-110103600	Tb427-050016600	Tb427-100062900	Tb427-010012000	Tb427-060007000:pseudogene
Tb427-060056400	Tb427-060042100	Tb427-090042700	Tb427-110184800	Tb427-090057700	Tb427-060037200
Tb427-090047300	Tb427-110028500	Tb427-100016400	Tb427-070069100	Tb427-030007500	Tb427-100017300
Tb427-060038100	Tb427-030042300	Tb427-080042600	Tb427-010020100	Tb427-060035500	Tb427-090039600
Tb427-060039700	Tb427-030055500	Tb427-040054500	Tb427-090007800	Tb427-100062900	Tb427-040036400
Tb427-110080800	Tb427-110153200	Tb427-020008300	Tb427-090079900	Tb427-030009300	Tb427-110039300
Tb427-050043100	Tb427-110049200	Tb427-100035700	Tb427-100147300	Tb427-050015500	Tb427-080016900
Tb427-070029300:pseudogene	Tb427-020013000	Tb427-050031400	Tb427-100012600	Tb427-050027000	Tb427-100015700
Tb427-090030100	Tb427-030012500	Tb427-040030300	Tb427-090071900	Tb427-000516000:pseudogene	Tb427-100106300
Tb427-080035400	Tb427-110089800	Tb427-110138100	Tb427-080087200	Tb427-020019400	Tb427-110173000
Tb427-100102400	Tb427-010022700	Tb427-030034800	Tb427-100026200	Tb427-050041000	Tb427-100005900
Tb427-090007500	Tb427-110038900	Tb427-030005500	Tb427-030027100	Tb427-080020100	Tb427-060037500
Tb427-090049200	Tb427-090076200	Tb427-100157500	Tb427-090055500	Tb427-090061700	Tb427-050007200
Tb427-050010900	Tb427-080049900	Tb427-050016000	Tb427-080042300	Tb427-080006300	Tb427-090061200
Tb427-100067700	Tb427-080051500	Tb427-100044200	Tb427-010015000	Tb427-040009700	Tb427-110046000
Tb427-010005600	Tb427-080052800	Tb427-060043800	Tb427-100138900	Tb427-100033600	Tb427-110122600
Tb427-100113800	Tb427-080083100	Tb427-070006700	Tb427-040021600	Tb427-110066800	Tb427-090068100
Tb427-100132800	Tb427-110013600	Tb427-100122900	Tb427-080064000	Tb427-070028400	Tb427-100045800
Tb427-050048100	Tb427-100092800	Tb427-000831900:pseudogene	Tb427-040032900	Tb427-010016400	Tb427-110046600
Tb427-110063100	Tb427-090068100	Tb427-100006000	Tb427-040008400	Tb427-110052800	Tb427-010022700
Tb427-110013200	Tb427-020020200	Tb427-110006900	Tb427-110135700	Tb427-050033000	Tb427-040034300
Tb427-110132500	Tb427-080049400	Tb427-090008700	Tb427-100104700	Tb427-000655300:pseudogene	Tb427-050031800
Tb427-110061800	Tb427-090015600	Tb427-110185200	Tb427-080039200	Tb427-070021300	Tb427-100027500
Tb427-100070600	Tb427-000497700	Tb427-100070000	Tb427-050025500	Tb427-080024900	Tb427-070009800
Tb427-090040700	Tb427-010014200	Tb427-110098700	Tb427-110039200	Tb427-070060600	Tb427-030055500
Tb427-090078800	Tb427-110166500	Tb427-030049800	Tb427-100134600	Tb427-100062800	Tb427-050041100
Tb427-090089900	Tb427-060052200	Tb427-110144500	Tb427-070045300	Tb427-080060300	Tb427-110184100
Tb427-050016200	Tb427-060052500:pseudogene	Tb427-110089200	Tb427-000804200:pseudogene	Tb427-090019900	Tb427-010017000
Tb427-090013700	Tb427-040043800	Tb427-090020500	Tb427-100084700	Tb427-050043800	Tb427-040030700
Tb427-080011200	Tb427-100086400	Tb427-110093700	Tb427-090088700	Tb427-030060100	Tb427-100119900
Tb427-110057900	Tb427-100019800	Tb427-080085800	Tb427-100099400	Tb427-020009900	Tb427-090008700
Tb427-110144100	Tb427-000578700:pseudogene	Tb427-080022900	Tb427-080069900	Tb427-110152400	Tb427-030053000
Tb427-080057100	Tb427-050010200	Tb427-110126500	Tb427-040042800	Tb427-100025400	Tb427-090030600
Tb427-040027000	Tb427-100043600	Tb427-050007200	Tb427-100029300	Tb427-050031700	Tb427-110102300
Tb427-010005700	Tb427-090083200	Tb427-110019500	Tb427-090075800	Tb427-060046000	Tb427-110028000
Tb427-050044300	Tb427-020030300	Tb427-080047400	Tb427-090061200	Tb427-040022400	Tb427-040033300
Tb427-060008200	Tb427-100070900	Tb427-030012700	Tb427-110010700	Tb427-010020200	Tb427-110039200
Tb427-070049000	Tb427-060011900	Tb427-010022800	Tb427-070047300	Tb427-110044600	Tb427-030028500
Tb427-100025800	Tb427-070049900	Tb427-040055100	Tb427-070079600	Tb427-050016100	Tb427-040009700
Tb427-050033700	Tb427-030042700	Tb427-050034400	Tb427-040009600	Tb427-010032100	Tb427-040014600
Tb427-090022900	Tb427-090080300	Tb427-060035000	Tb427-110182500	Tb427-100054300	Tb427-090046100
Tb427-070078200	Tb427-040008700	Tb427-060047300	Tb427-080063700	Tb427-030013300	Tb427-030042800
Tb427-010010800	Tb427-090070700	Tb427-100165000	Tb427-090058900	Tb427-030017200	Tb427-000835300
Tb427-090085200	Tb427-090055100	Tb427-060032700	Tb427-040036400	Tb427-110040500	Tb427-070010900
Tb427-100040600	Tb427-050052600	Tb427-040010400	Tb427-090058400	Tb427-100049300	Tb427-030005600:pseudogene
Tb427-090036300	Tb427-050045200	Tb427-050015100	Tb427-070049100	Tb427-040005600	Tb427-110067800
Tb427-050050300	Tb427-100040900	Tb427-100072800	Tb427-100026700	Tb427-100068700	Tb427-110149500
Tb427-070038200	Tb427-100027700	Tb427-080040200	Tb427-100100900	Tb427-080029800	Tb427-060055500
Tb427-090019900	Tb427-060031800	Tb427-090028700	Tb427-100125900	Tb427-100054600	Tb427-110048600
Tb427-100140700	Tb427-110080700	Tb427-050041100	Tb427-100167800	Tb427-100046700	Tb427-110082200
Tb427-030034800	Tb427-070020700	Tb427-110046600	Tb427-030041100	Tb427-080030100	Tb427-110163200
Tb427-020011900	Tb427-100063800:pseudogene	Tb427-060018300	Tb427-040029000	Tb427-080028500	Tb427-040054700
Tb427-110094600	Tb427-100010100	Tb427-090075400	Tb427-100169100	Tb427-090048000	Tb427-100021200
Tb427-060040200	Tb427-080058400	Tb427-110058100	Tb427-030047800	Tb427-110073600	Tb427-100145700
Tb427-100054900	Tb427-110018500	Tb427-110124700	Tb427-090077400	Tb427-110156400	Tb427-040056000
Tb427-100164600	Tb427-010032600	Tb427-090085500	Tb427-110058400	Tb427-050007200	Tb427-060016400
Tb427-030020400	Tb427-100151200:pseudogene	Tb427-040009000	Tb427-020016300	Tb427-020027800	Tb427-060018500
Tb427-060008300	Tb427-070008300	Tb427-100149300	Tb427-100094900	Tb427-100098400	Tb427-000636500:pseudogene
Tb427-040018700	Tb427-110098700	Tb427-000835300	Tb427-090089000	Tb427-110007800	Tb427-030052300
Tb427-100104100	Tb427-100035500	Tb427-040054700	Tb427-090050000	Tb427-060026700	Tb427-070062500
Tb427-050010200	Tb427-100026000	Tb427-110142400	Tb427-090011700	Tb427-070041200	Tb427-090050800
Tb427-060020500	Tb427-100164500	Tb427-110064800	Tb427-110029200	Tb427-080011500	Tb427-100057000
Tb427-110046300	Tb427-090029200	Tb427-100140300	Tb427-110064300	Tb427-060035700	Tb427-070080900
Tb427-110055200	Tb427-110062400	Tb427-080066600	Tb427-110092200	Tb427-100011800	Tb427-060039300
Tb427-020015600	Tb427-050031500	Tb427-090046900	Tb427-110095800	Tb427-090046000	Tb427-090029400
Tb427-060039200	Tb427-020019200	Tb427-050026900	Tb427-110185200	Tb427-080061800	Tb427-080013800
Tb427-100101500	Tb427-080074900	Tb427-070036800	Tb427-040030700	Tb427-100017300	Tb427-080087000
Tb427-110063500	Tb427-110082700	Tb427-110056300	Tb427-070025200	Tb427-080066400	Tb427-110118800
Tb427-060048400	Tb427-080047200	Tb427-110058800	Tb427-010011900	Tb427-090050800	Tb427-090039300
Tb427-080088600	Tb427-090051900	Tb427-080034400	Tb427-030043800	Tb427-000702600	Tb427-100027300
Tb427-070016200	Tb427-080078700	Tb427-080006600	Tb427-010010000	Tb427-040033800	Tb427-030032600
Tb427-060011500	Tb427-090037000	Tb427-110132300	Tb427-110026900	Tb427-080038200	Tb427-100059900
Tb427-100025400	Tb427-110072300	Tb427-070016200	Tb427-100107400	Tb427-060054500	Tb427-110124100
Tb427-080024200	Tb427-090013700	Tb427-100084500	Tb427-110085400	Tb427-100026000	Tb427-080032800
Tb427-100136000	Tb427-110122200	Tb427-090087000	Tb427-020009700	Tb427-040042800	Tb427-010028900
Tb427-070026000	Tb427-090015000	Tb427-100020700	Tb427-040032100	Tb427-040028700	Tb427-000110300
Tb427-000107400	Tb427-110022400	Tb427-080008800	Tb427-080085400	Tb427-080073200	Tb427-110186200
Tb427-000730800	Tb427-080069400	Tb427-010009300	Tb427-110162600	Tb427-110160200	Tb427-110017300
Tb427-040028400	Tb427-020020100	Tb427-110039300	Tb427-020018300	Tb427-000500400	Tb427-110032400
Tb427-100157500	Tb427-110066700	Tb427-100106900	Tb427-110171500	Tb427-020013500	Tb427-100055700:pseudogene
Tb427-100161200	Tb427-050038000	Tb427-100086600	Tb427-040007400	Tb427-090008000	Tb427-070054900
Tb427-100134100	Tb427-100037500	Tb427-080062600	Tb427-040030800	Tb427-060005800:pseudogene	Tb427-040010900:pseudogene
Tb427-070012200	Tb427-050042000	Tb427-110145700	Tb427-110120100	Tb427-040028200	Tb427-110171500
Tb427-070040500	Tb427-040028200	Tb427-090046500:pseudogene	Tb427-100101000	Tb427-110168500	Tb427-080040000
Tb427-100012600	Tb427-100162800	Tb427-070057700	Tb427-110170300	Tb427-100135500	Tb427-100096500
Tb427-040018800	Tb427-010016100	Tb427-100135000	Tb427-050018400	Tb427-010005700	Tb427-100137100
Tb427-040038000	Tb427-110088300	Tb427-110167800	Tb427-110031900	Tb427-090062000	Tb427-050016000
Tb427-110060200	Tb427-070063500	Tb427-070014400	Tb427-060020100	Tb427-040009800	Tb427-000794000:pseudogene
Tb427-100068700	Tb427-050048400	Tb427-010013700	Tb427-100055300	Tb427-040048400	Tb427-080046600
Tb427-100067900	Tb427-090007000	Tb427-040054900	Tb427-110167700	Tb427-100169100	Tb427-100080800
Tb427-010032200	Tb427-090040100	Tb427-110062700	Tb427-040026300	Tb427-050013800	Tb427-040014700:pseudogene
Tb427-090089000	Tb427-100087200	Tb427-100051500	Tb427-050045700	Tb427-110189800	Tb427-100111000
Tb427-100134700	Tb427-070025300	Tb427-030051700	Tb427-080033100	Tb427-000014200	Tb427-040032100
Tb427-090039400	Tb427-090081300	Tb427-010017000	Tb427-110162800	Tb427-090068300	Tb427-110048900
Tb427-090025000	Tb427-000481500	Tb427-080056800	Tb427-010016200	Tb427-050034900	Tb427-070059400:pseudogene
Tb427-100098600	Tb427-100087100	Tb427-100059900	Tb427-110029700	Tb427-090083800	Tb427-060011700
Tb427-110056300	Tb427-100066000	Tb427-030054300	Tb427-080072600	Tb427-020016000	Tb427-080033300
Tb427-070025300	Tb427-070048100	Tb427-110046000	Tb427-090055600	Tb427-110072700	Tb427-040049800
Tb427-010022700	Tb427-070028400	Tb427-100152200	Tb427-090039600	Tb427-110158100	Tb427-110064800
Tb427-060043900	Tb427-110160300	Tb427-090070900	Tb427-070014700	Tb427-100151200:pseudogene	Tb427-110047000
Tb427-080066500	Tb427-090069300	Tb427-100143600:pseudogene	Tb427-030013900	Tb427-050046900	Tb427-060035300
Tb427-050039100	Tb427-070052600	Tb427-070010900	Tb427-110055400	Tb427-100132000	Tb427-110056400
Tb427-110138800	Tb427-060016500	Tb427-050022800	Tb427-080064400	Tb427-020010200	Tb427-100080600
Tb427-090020500	Tb427-110167100	Tb427-110138800	Tb427-110119900	Tb427-110107200	Tb427-070017700
Tb427-010032100	Tb427-110043100	Tb427-090062300	Tb427-030028200	Tb427-000277700:pseudogene	Tb427-000639900:pseudogene
Tb427-100036100	Tb427-110090300	Tb427-110122600	Tb427-060018500	Tb427-100022700	Tb427-080035200
Tb427-110183200	Tb427-080049800	Tb427-090072500	Tb427-100102400	Tb427-100151100	Tb427-080064700
Tb427-060045400	Tb427-100133900:pseudogene	Tb427-090055600	Tb427-060032000	Tb427-010013500	Tb427-100147300
Tb427-100029500	Tb427-040054500	Tb427-030040200	Tb427-110034700	Tb427-050034000	Tb427-110043300
Tb427-040053600	Tb427-080087600	Tb427-060037500	Tb427-100032700	Tb427-100131100	Tb427-090065700
Tb427-090072400	Tb427-010012200	Tb427-070009800	Tb427-070008100	Tb427-000311100	Tb427-050016600
Tb427-100063200	Tb427-110029400	Tb427-090062000	Tb427-110050100	Tb427-080060400	Tb427-040032200
Tb427-110028200	Tb427-020013700	Tb427-090088800	Tb427-060038500	Tb427-110066700	Tb427-100168200
Tb427-100161100	Tb427-060038100	Tb427-070038200	Tb427-110167300	Tb427-070050900	Tb427-090037200
Tb427-030060100	Tb427-090090300	Tb427-070017900:pseudogene	Tb427-070025700	Tb427-060016400	Tb427-070069500
Tb427-110135800	Tb427-100049900	Tb427-100053700	Tb427-040010900:pseudogene	Tb427-020010600	Tb427-040018800
Tb427-030051600	Tb427-110073900	Tb427-110091900	Tb427-110128700	Tb427-040031700	Tb427-070068900
Tb427-080029100	Tb427-080068200	Tb427-090048300	Tb427-110020200	Tb427-100026200	Tb427-070007800
Tb427-110072300	Tb427-000673600:pseudogene	Tb427-110121600	Tb427-070063900	Tb427-090032700	Tb427-040031000
Tb427-050020500	Tb427-110045300	Tb427-110059200	Tb427-100044300	Tb427-060026000	Tb427-040044500
Tb427-080007700	Tb427-100068300	Tb427-100005900	Tb427-080020500	Tb427-050013100	Tb427-110045900
Tb427-090006900	Tb427-030056400	Tb427-100136500	Tb427-080070900	Tb427-030013700	Tb427-030016100
Tb427-010017000	Tb427-020024000	Tb427-070080900	Tb427-110072300	Tb427-030042300	Tb427-050017400
Tb427-070055000	Tb427-040013100	Tb427-100040600	Tb427-040018800	Tb427-090046100	Tb427-110089800
Tb427-060048500	Tb427-060039200	Tb427-080029800	Tb427-090011900	Tb427-070070100	Tb427-040008400
Tb427-110138100	Tb427-080020100	Tb427-110017600	Tb427-100160800	Tb427-000304600:pseudogene	Tb427-040030800
Tb427-110061500	Tb427-100138700	Tb427-020027800	Tb427-030042400	Tb427-110153200	Tb427-110130200
Tb427-060044200	Tb427-050010900	Tb427-010028600	Tb427-030015300	Tb427-090059800	Tb427-110102600
Tb427-050007200	Tb427-110023200	Tb427-090040600	Tb427-000014500:pseudogene	Tb427-080066500	Tb427-060032000
Tb427-110089800	Tb427-090044500:pseudogene	Tb427-000819000:pseudogene	Tb427-110151200	Tb427-030047600	Tb427-080052100
Tb427-100146400	Tb427-100130700	Tb427-040011100	Tb427-060053100	Tb427-010015000	Tb427-020008700
Tb427-100169500	Tb427-040040700	Tb427-090039300	Tb427-110103400	Tb427-040025700	Tb427-030009300
Tb427-000635000:pseudogene	Tb427-090007100	Tb427-070062800	Tb427-070067500	Tb427-110166100	Tb427-050018400
Tb427-110149000	Tb427-030045100	Tb427-060016600	Tb427-100016700	Tb427-040028000	Tb427-110084300
Tb427-110147400	Tb427-070039400	Tb427-100012000	Tb427-030042100	Tb427-110166500	Tb427-090038200
Tb427-080088700	Tb427-030041100	Tb427-100045800	Tb427-050046100	Tb427-030016400	Tb427-080054200
Tb427-080040200	Tb427-080081200	Tb427-010012500	Tb427-090042300	Tb427-000173800	Tb427-060038600
Tb427-010023700	Tb427-110067700	Tb427-100140400	Tb427-080072900	Tb427-080038800	Tb427-030049800
Tb427-100164500	Tb427-110180900	Tb427-110184500	Tb427-100107700	Tb427-100113400	Tb427-080037100
Tb427-100168800	Tb427-090059800	Tb427-110106400	Tb427-040044500	Tb427-090012700	Tb427-110065300
Tb427-110111600	Tb427-100055500	Tb427-070011600	Tb427-100140400	Tb427-110153000	Tb427-050011300
Tb427-000485600:pseudogene	Tb427-000349300	Tb427-110064300	Tb427-020017000	Tb427-090091400	Tb427-060033300
Tb427-030019400	Tb427-100140900	Tb427-110173300	Tb427-100168300	Tb427-040019400	Tb427-040050700
Tb427-050021300	Tb427-100127100	Tb427-090079400	Tb427-070046000	Tb427-030051700	Tb427-030005500
Tb427-080058400	Tb427-080040700	Tb427-080009600	Tb427-010008600	Tb427-110140900	Tb427-090079400
Tb427-030030900	Tb427-110007500	Tb427-070079200	Tb427-060046500	Tb427-050038200	Tb427-100086600
Tb427-010025100	Tb427-100053700	Tb427-110171400	Tb427-090028700	Tb427-070080000	Tb427-070082500
Tb427-110156500	Tb427-010028700	Tb427-100132500	Tb427-080085900	Tb427-110084400	Tb427-110162100
Tb427-010023800	Tb427-000109000	Tb427-040042800	Tb427-090087500	Tb427-090075100	Tb427-020026500
Tb427-050050600	Tb427-110064100	Tb427-070036000	Tb427-090006500	Tb427-040044500	Tb427-040014500
Tb427-110174800	Tb427-100042600	Tb427-100119900	Tb427-110005600	Tb427-070009800	Tb427-010013500
Tb427-090071800	Tb427-060054800	Tb427-090035100	Tb427-110145100	Tb427-030044800	Tb427-100101200
Tb427-090016500	Tb427-100135300	Tb427-060052200	Tb427-090037200	Tb427-100104400	Tb427-050052300
Tb427-110122200	Tb427-100048800	Tb427-070025200	Tb427-030057100	Tb427-010011100	Tb427-070062200
Tb427-070058600	Tb427-070079900	Tb427-050026300	Tb427-000831900:pseudogene	Tb427-060031800	Tb427-100162400
Tb427-100075900	Tb427-010020200	Tb427-110108000	Tb427-080023300	Tb427-090008700	Tb427-110081400
Tb427-110013900	Tb427-060015300	Tb427-090017300	Tb427-100058400	Tb427-100163400	Tb427-100059100
Tb427-100126900	Tb427-100062900	Tb427-110027400	Tb427-010006200	Tb427-070052700	Tb427-070025400
Tb427-080037200	Tb427-070050900	Tb427-110180800	Tb427-050038500	Tb427-110138400	Tb427-000673600:pseudogene
Tb427-030019000	Tb427-110059700	Tb427-050038500	Tb427-040025200	Tb427-080047700	Tb427-100101000
Tb427-090009200	Tb427-050033000	Tb427-080038900	Tb427-100042300	Tb427-100048800	Tb427-100064400
Tb427-100026300	Tb427-040025800	Tb427-020016200	Tb427-050037100	Tb427-040023900	Tb427-030059500
Tb427-080081400	Tb427-100104100	Tb427-110152100	Tb427-100147900	Tb427-080031900	Tb427-110125700
Tb427-100026200	Tb427-110064300	Tb427-110031900	Tb427-110138100	Tb427-100076500	Tb427-110152500
Tb427-030014000	Tb427-100031600	Tb427-100113900	Tb427-040009800	Tb427-010005600	Tb427-100168500
Tb427-080077000	Tb427-110054900	Tb427-100055200	Tb427-110180800	Tb427-100157600	Tb427-080058500
Tb427-090020900	Tb427-090062000	Tb427-010029500	Tb427-090081800	Tb427-010024800	Tb427-050015100
Tb427-000014800	Tb427-110122500	Tb427-070030100	Tb427-110119800	Tb427-020013200	Tb427-020013200
Tb427-110169200	Tb427-040015400	Tb427-100109400:pseudogene	Tb427-030051700	Tb427-050032800	Tb427-030007600
Tb427-040040800	Tb427-100057200	Tb427-110167300	Tb427-070016100	Tb427-080026200	Tb427-110050400
Tb427-100087100	Tb427-030044600	Tb427-110051100	Tb427-070078000	Tb427-040011700	Tb427-010011900
Tb427-040024900	Tb427-010029600	Tb427-090050800	Tb427-080007200	Tb427-100162600	Tb427-070007100
Tb427-070072800	Tb427-090044000	Tb427-030012800	Tb427-040033300	Tb427-090070600	Tb427-080085400
Tb427-100083300	Tb427-050022200	Tb427-110134300	Tb427-060034400	Tb427-100108200	Tb427-110163900
Tb427-110052800	Tb427-090068800	Tb427-060039000	Tb427-060048500	Tb427-080024000	Tb427-080057200
Tb427-020015800	Tb427-110128200	Tb427-040014700:pseudogene	Tb427-110143000	Tb427-110050700	Tb427-100100100
Tb427-080080900	Tb427-040027900	Tb427-010010700	Tb427-060035700	Tb427-090011900	Tb427-100109900
Tb427-110020900	Tb427-060008300	Tb427-070006300	Tb427-090085200	Tb427-100057000	Tb427-040007400
Tb427-100046000	Tb427-060045400	Tb427-060038300	Tb427-010024700	Tb427-090057200	Tb427-090092200
Tb427-110018000	Tb427-110080200	Tb427-040006700	Tb427-100035300	Tb427-080041500	Tb427-080013300
Tb427-080079300:pseudogene	Tb427-050024900	Tb427-070062300	Tb427-110091400	Tb427-080009600	Tb427-110158300
Tb427-030028800	Tb427-070078000	Tb427-110173900	Tb427-080024900	Tb427-000578400:pseudogene	Tb427-080070900
Tb427-050031100	Tb427-070045300	Tb427-080020200	Tb427-100049900	Tb427-090018900	Tb427-040044600
Tb427-070027500	Tb427-060035700	Tb427-110025900	Tb427-110088600	Tb427-110143500	Tb427-100133700
Tb427-110159500	Tb427-100087000	Tb427-080017800	Tb427-040009000	Tb427-000544500:pseudogene	Tb427-060039000
Tb427-050031700	Tb427-040044500	Tb427-040027300	Tb427-110073900	Tb427-080086900	Tb427-050033500
Tb427-110034100	Tb427-070012500	Tb427-070049100	Tb427-090083800	Tb427-110174000	Tb427-110134600
Tb427-030051700	Tb427-040026600	Tb427-080084600	Tb427-090072400	Tb427-100034000	Tb427-020027600
Tb427-010029600	Tb427-080026500	Tb427-100020200	Tb427-040046100	Tb427-030041200	Tb427-110044800
Tb427-010028700	Tb427-090089900	Tb427-110036800	Tb427-080039800	Tb427-030039100	Tb427-050047300
Tb427-090081300	Tb427-100126700	Tb427-040049700	Tb427-030028100	Tb427-010022000	Tb427-100011300
Tb427-070063900	Tb427-050008300	Tb427-110124100	Tb427-110032500	Tb427-090052300	Tb427-070060900
Tb427-020022900	Tb427-100138300	Tb427-030023900	Tb427-100062700	Tb427-100158200	Tb427-030023900
Tb427-110134700	Tb427-050048000	Tb427-100149800	Tb427-100162400	Tb427-060033300	Tb427-110066800
Tb427-080052000	Tb427-090027700	Tb427-080027400	Tb427-060053500	Tb427-030022700	Tb427-090057200
Tb427-090074800	Tb427-100080500	Tb427-100168500	Tb427-080024500	Tb427-090039700	Tb427-090027200
Tb427-100008300:pseudogene	Tb427-090045900	Tb427-040016400	Tb427-100027300	Tb427-080058000	Tb427-080064400
Tb427-100065500	Tb427-090007400	Tb427-090018700	Tb427-090076600	Tb427-040051600	Tb427-070058300
Tb427-110064300	Tb427-110018100	Tb427-110035600	Tb427-110052800	Tb427-030047800	Tb427-030008100
Tb427-030012800	Tb427-080086900	Tb427-100021600	Tb427-110109100	Tb427-080086500	Tb427-100105500
Tb427-070062100	Tb427-070034800	Tb427-110093500	Tb427-020021300	Tb427-110079600	Tb427-100029300
Tb427-040025700	Tb427-010031000	Tb427-110032500	Tb427-040052300	Tb427-050037100	Tb427-070014700
Tb427-070038600	Tb427-030015000	Tb427-110045100	Tb427-100011200	Tb427-100146400	Tb427-080088700
Tb427-070067500	Tb427-110167700	Tb427-090076600	Tb427-080071000	Tb427-010012900	Tb427-110085200
Tb427-100135500	Tb427-070077700	Tb427-100058500	Tb427-060015400	Tb427-070025500	Tb427-100153200
Tb427-040054300	Tb427-090021800	Tb427-080035800	Tb427-040034100	Tb427-000015100	Tb427-100015900
Tb427-010010500	Tb427-040008600	Tb427-110142800	Tb427-080029800	Tb427-080069700	Tb427-040032900
Tb427-110064000	Tb427-010010800	Tb427-060041500	Tb427-110143800	Tb427-090083300	Tb427-090020900
Tb427-060012400	Tb427-030046900	Tb427-110133600	Tb427-030006800	Tb427-070076900	Tb427-010032000
Tb427-100007200	Tb427-070063400	Tb427-040048500	Tb427-040040200	Tb427-110122600	Tb427-090075100
Tb427-090061300	Tb427-060043600	Tb427-110106800	Tb427-110056400	Tb427-080027300	Tb427-110162800
Tb427-080077500	Tb427-060005800:pseudogene	Tb427-110178400	Tb427-050033500	Tb427-110062900	Tb427-100149300
Tb427-020007800	Tb427-100157600	Tb427-110158200	Tb427-060032200:pseudogene	Tb427-040012500	Tb427-030029700
Tb427-100059300	Tb427-000797400:pseudogene	Tb427-040033500	Tb427-110160100	Tb427-050052900	Tb427-030059800
Tb427-080042900	Tb427-090059100	Tb427-100135800	Tb427-100021200	Tb427-060018600	Tb427-090062300
Tb427-090015100	Tb427-100150200	Tb427-090016000	Tb427-110061200	Tb427-060031400	Tb427-000754700:pseudogene
Tb427-030024300	Tb427-010015000	Tb427-070034700	Tb427-050030100	Tb427-030020000	Tb427-070008100
Tb427-090069900	Tb427-110057400	Tb427-080024900	Tb427-110043900	Tb427-040042600	Tb427-060039900
Tb427-090078000	Tb427-090022200	Tb427-100079900	Tb427-090062000	Tb427-080044700	Tb427-110184500
Tb427-030059400	Tb427-100049200	Tb427-110087400:pseudogene	Tb427-110057700	Tb427-060007500	Tb427-100122900
Tb427-110062300	Tb427-100076500	Tb427-110019200	Tb427-100012200	Tb427-080051700	Tb427-060041900
Tb427-050013800	Tb427-080047700	Tb427-100168200	Tb427-080028000	Tb427-070018100	Tb427-020022400
Tb427-030013300	Tb427-030052300	Tb427-100136700	Tb427-100057000	Tb427-110074700	Tb427-030008200
Tb427-100126600	Tb427-040009300	Tb427-090051200	Tb427-020012500	Tb427-110156300	Tb427-030028200
Tb427-090087000	Tb427-110150900	Tb427-070082700	Tb427-080011700	Tb427-020017200	Tb427-030031600
Tb427-070047600	Tb427-110095000	Tb427-110175100	Tb427-110184100	Tb427-100113300	Tb427-090088900
Tb427-060049400	Tb427-090081200	Tb427-050022500	Tb427-100064400	Tb427-110019500	Tb427-100107500
Tb427-030058600	Tb427-110046600	Tb427-030022700	Tb427-090062400	Tb427-070006600	Tb427-110162000
Tb427-040042600	Tb427-110039200	Tb427-040005700	Tb427-030016100	Tb427-080063600	Tb427-030013300
Tb427-090067000	Tb427-020008000	Tb427-090087800	Tb427-100090200	Tb427-010015600	Tb427-110081000
Tb427-110063300	Tb427-020027800	Tb427-050047300	Tb427-030038100	Tb427-090079900	Tb427-030010500
Tb427-020013200	Tb427-110048600	Tb427-110080800	Tb427-080009600	Tb427-110040400	Tb427-080088100
Tb427-110104400	Tb427-080007600	Tb427-060009200	Tb427-100060200	Tb427-060055600	Tb427-050037300
Tb427-020022400	Tb427-090015100	Tb427-100111000	Tb427-050026300	Tb427-100134300	Tb427-110124800
Tb427-070008300	Tb427-100131100	Tb427-070039200	Tb427-110006900	Tb427-100106300	Tb427-050022800
Tb427-060038500	Tb427-070035900	Tb427-100080600	Tb427-090036500	Tb427-060037200	Tb427-080072000
Tb427-080031900	Tb427-110080400	Tb427-030027100	Tb427-100077900	Tb427-100032400	Tb427-090013500
Tb427-070051200	Tb427-000647800:pseudogene	Tb427-100039900	Tb427-060038600	Tb427-110028000	Tb427-100046200:pseudogene
Tb427-060046500	Tb427-010020100	Tb427-090038200	Tb427-110161500	Tb427-090011700	Tb427-060036300
Tb427-100032500	Tb427-070018400	Tb427-030005600:pseudogene	Tb427-070073300	Tb427-100136700	Tb427-010016200
Tb427-050038200	Tb427-100102600	Tb427-070048100	Tb427-080078700	Tb427-090072900	Tb427-090027400
Tb427-090022500	Tb427-100168800	Tb427-110173000	Tb427-100171000	Tb427-000245300:pseudogene	Tb427-080077400
Tb427-050047300	Tb427-100152900	Tb427-040044600	Tb427-090085500	Tb427-090013500	Tb427-080057100
Tb427-050013300	Tb427-110068300	Tb427-110149500	Tb427-100135000	Tb427-110107700	Tb427-090088800
Tb427-040023400	Tb427-030053800	Tb427-060037200	Tb427-060038400	Tb427-040044000	Tb427-100028800
Tb427-100078100	Tb427-110024200	Tb427-110189400	Tb427-110167000	Tb427-050015400	Tb427-100011200
Tb427-010029500	Tb427-100054300	Tb427-040050700	Tb427-080016900	Tb427-100170900	Tb427-110065100
Tb427-070037300	Tb427-090045600	Tb427-060014200	Tb427-100012100	Tb427-040033600	Tb427-070017500
Tb427-110053600	Tb427-040009200	Tb427-070054900	Tb427-100123700	Tb427-110058200	Tb427-110138000
Tb427-060046200	Tb427-100009500	Tb427-030042400	Tb427-100025200	Tb427-030035000:pseudogene	Tb427-020032300
Tb427-050038500	Tb427-060040000	Tb427-110065300	Tb427-080064700	Tb427-080058900	Tb427-100148700
Tb427-110162800	Tb427-080005400:pseudogene	Tb427-080034500	Tb427-060054500	Tb427-030008500	Tb427-070055400
Tb427-040031100	Tb427-070006700	Tb427-110150700	Tb427-100077200	Tb427-110096500	Tb427-070012200
Tb427-090062100	Tb427-090029000	Tb427-110154000	Tb427-110045900	Tb427-100037900	Tb427-110016800
Tb427-090035300	Tb427-040044300	Tb427-040017900	Tb427-080050500	Tb427-110188300	Tb427-110183500
Tb427-000274800:pseudogene	Tb427-060056000	Tb427-100070100	Tb427-030059100	Tb427-110005900	Tb427-060029900
Tb427-040014200	Tb427-080077000	Tb427-100122800	Tb427-020019400	Tb427-100040400	Tb427-100068600:pseudogene
Tb427-070046000	Tb427-090045200	Tb427-100031300	Tb427-050037300	Tb427-110091700	Tb427-040031900
Tb427-080012800	Tb427-100048700	Tb427-030038100	Tb427-020022900	Tb427-020008300	Tb427-110175100
Tb427-000544500:pseudogene	Tb427-110124800	Tb427-070037200	Tb427-110102300	Tb427-050015100	Tb427-070006600
Tb427-110103400	Tb427-080077700	Tb427-080087000	Tb427-050016100	Tb427-100054800:pseudogene	Tb427-090007700
Tb427-040042100	Tb427-060014800	Tb427-010031000	Tb427-090011500	Tb427-070019500	Tb427-010014200
Tb427-080036800	Tb427-100080600	Tb427-110013900	Tb427-050010900	Tb427-070077000	Tb427-070041300
Tb427-080038400	Tb427-110184600	Tb427-050033900	Tb427-030009300	Tb427-050033100	Tb427-090091300
Tb427-070079200	Tb427-030054900	Tb427-110053700	Tb427-100135800	Tb427-110085900	Tb427-100034800
Tb427-100137200	Tb427-100078700	Tb427-020022500	Tb427-010031200	Tb427-030014500	Tb427-110056800
Tb427-040042800	Tb427-110060100	Tb427-010028900	Tb427-100106100	Tb427-070029800	Tb427-110130900
Tb427-020022800	Tb427-060038500	Tb427-080072400	Tb427-090006100	Tb427-110170900	Tb427-080063700
Tb427-050035500	Tb427-000304600:pseudogene	Tb427-110044800	Tb427-070060600	Tb427-010014600	Tb427-060037100
Tb427-110100900	Tb427-110064200	Tb427-080058500	Tb427-110164600	Tb427-080038900	Tb427-110125600
Tb427-080084200	Tb427-110170600	Tb427-030026700	Tb427-030027500	Tb427-110010700	Tb427-080022900
Tb427-110145700	Tb427-110173300	Tb427-110084300	Tb427-040054900	Tb427-050018400	Tb427-110169400
Tb427-090066300	Tb427-010032000	Tb427-100118700	Tb427-030008200	Tb427-070067200	Tb427-100027600
Tb427-090052400	Tb427-110018700	Tb427-100026200	Tb427-020027600	Tb427-080013300	Tb427-110135700
Tb427-100149400	Tb427-090070900	Tb427-040014500	Tb427-110135100	Tb427-110099500	Tb427-110087900
Tb427-070076600	Tb427-110098600	Tb427-060038100	Tb427-110016600	Tb427-070013800	Tb427-080085900
Tb427-080026500	Tb427-040054200	Tb427-080035200	Tb427-100125000	Tb427-100101000	Tb427-110029700
Tb427-090020300	Tb427-090034600	Tb427-040022400	Tb427-100101200	Tb427-050021400	Tb427-080035000
Tb427-060034500	Tb427-100065500	Tb427-040016100	Tb427-090058100	Tb427-050041200	Tb427-100063800:pseudogene
Tb427-060037100	Tb427-100014200	Tb427-090022800	Tb427-080011200	Tb427-100083900	Tb427-110023300
Tb427-110072700	Tb427-100011400	Tb427-090091500	Tb427-110030900	Tb427-040032900	Tb427-070061500
Tb427-110091900	Tb427-100170300	Tb427-100136200	Tb427-100157500	Tb427-090069100	Tb427-110084800:pseudogene
Tb427-040031500	Tb427-070009200	Tb427-100023700:pseudogene	Tb427-100145100	Tb427-020008200	Tb427-070069100
Tb427-110061400	Tb427-100144500	Tb427-030032000	Tb427-050026000	Tb427-090040500	Tb427-110133600
Tb427-100019000	Tb427-050046100	Tb427-070019700	Tb427-070017700	Tb427-070067900	Tb427-030010300
Tb427-030012000	Tb427-080019800	Tb427-100096500	Tb427-110017800	Tb427-110080000	Tb427-070012700
Tb427-110119500	Tb427-080038800	Tb427-110172600	Tb427-100046200:pseudogene	Tb427-020032900	Tb427-000497700
Tb427-060032700	Tb427-110060000	Tb427-100059100	Tb427-010030900	Tb427-060037900	Tb427-110014400
Tb427-030034000	Tb427-070077500	Tb427-100163600	Tb427-090022500	Tb427-100097200	Tb427-020015600
Tb427-040037100	Tb427-100115000	Tb427-110028000	Tb427-070067800	Tb427-100168600	Tb427-100048100:pseudogene
Tb427-030023700	Tb427-090056100	Tb427-040056600	Tb427-060038300	Tb427-100033800	Tb427-110007300
Tb427-090050500	Tb427-110103100	Tb427-090083800	Tb427-040031900	Tb427-050033800	Tb427-110024900
Tb427-100109700	Tb427-110027300	Tb427-010031300	Tb427-090039700	Tb427-110120300	Tb427-090064800
Tb427-100041700	Tb427-040018000	Tb427-040025000	Tb427-090068100	Tb427-010005500	Tb427-050033000
Tb427-110005600	Tb427-040033800	Tb427-060029200	Tb427-010014800	Tb427-100083700	Tb427-040027300
Tb427-040043200	Tb427-110159000	Tb427-020007900	Tb427-040006400	Tb427-080079100	Tb427-100122800
Tb427-110063800	Tb427-110168300	Tb427-030052300	Tb427-030031500	Tb427-050045500	Tb427-110057500
Tb427-110124500	Tb427-110083700	Tb427-040034300	Tb427-090020900	Tb427-000678500	Tb427-100072200
Tb427-110148000	Tb427-070007400	Tb427-110007300	Tb427-030016000	Tb427-030057100	Tb427-050030300
Tb427-110067800	Tb427-060025200	Tb427-050030100	Tb427-000754700:pseudogene	Tb427-080028200	Tb427-110104800
Tb427-060016000	Tb427-100160300	Tb427-020019400	Tb427-070006600	Tb427-040041500	Tb427-080005500
Tb427-110139300	Tb427-080071000	Tb427-100055300	Tb427-110017500	Tb427-100026400	Tb427-050032800
Tb427-040005600	Tb427-080042400	Tb427-110151200	Tb427-110163200	Tb427-100170400	Tb427-060040700
Tb427-070073500	Tb427-110046800	Tb427-040056000	Tb427-100126900	Tb427-110159300	Tb427-100016700
Tb427-110157400	Tb427-100058900	Tb427-110186600	Tb427-110165500	Tb427-100056200	Tb427-110163500
Tb427-030016100	Tb427-050016000	Tb427-100123700	Tb427-100098400	Tb427-100096500	Tb427-100110900
Tb427-080073200	Tb427-100011800	Tb427-100168700	Tb427-110082200	Tb427-050014500	Tb427-110159300
Tb427-110155900	Tb427-080010600	Tb427-040031800	Tb427-100106300	Tb427-070036900	Tb427-110037000
Tb427-050031800	Tb427-110174000	Tb427-080008200	Tb427-100031700	Tb427-020026600	Tb427-050007700
Tb427-110033600	Tb427-090048300	Tb427-110163500	Tb427-070068900	Tb427-090007800	Tb427-090086400:pseudogene
Tb427-080083100	Tb427-080044400	Tb427-060005800:pseudogene	Tb427-100099600	Tb427-070017500	Tb427-060031900
Tb427-040023900	Tb427-000720800:pseudogene	Tb427-010015100	Tb427-100039900	Tb427-100063000	Tb427-010006000
Tb427-110017800	Tb427-030017400	Tb427-080005500	Tb427-110073600	Tb427-090082200	Tb427-090063000
Tb427-050052900	Tb427-050041100	Tb427-090089600	Tb427-060018400	Tb427-000349200	Tb427-100085000
Tb427-030024500	Tb427-100042500	Tb427-000014700	Tb427-100128500	Tb427-050036900	Tb427-040029500
Tb427-020010500	Tb427-100036400	Tb427-110185300	Tb427-090077100	Tb427-080084400	Tb427-030050300
Tb427-070011500	Tb427-000198100:pseudogene	Tb427-080078100	Tb427-100096100	Tb427-110046400:pseudogene	Tb427-040052000
Tb427-050007700	Tb427-020029800	Tb427-030008100	Tb427-010005900	Tb427-070055100	Tb427-100051900
Tb427-070059400:pseudogene	Tb427-110091000	Tb427-030023100:pseudogene	Tb427-000347900	Tb427-070007800	Tb427-010031000
Tb427-000485800	Tb427-080034900	Tb427-040026100	Tb427-100150400	Tb427-090041100	Tb427-050041800
Tb427-050010800	Tb427-060047000	Tb427-040030500:pseudogene	Tb427-090056600	Tb427-050038100	Tb427-110035900
Tb427-100168200	Tb427-040054700	Tb427-110042300	Tb427-070007800	Tb427-040016100	Tb427-090092900
Tb427-060047300	Tb427-060031700	Tb427-090046100	Tb427-110008900	Tb427-100028800	Tb427-030030000
9S-rRNA	Tb427-070063900	Tb427-110074900	Tb427-010030300	Tb427-090014400	Tb427-040052300
Tb427-050034000	Tb427-110090000	Tb427-060016400	Tb427-110063400	Tb427-000347900	Tb427-070082000
Tb427-030016600	Tb427-060016900	Tb427-110155800	Tb427-080035000	Tb427-080034400	Tb427-080008200
Tb427-040018200	Tb427-080019000	Tb427-100027000	Tb427-100096600	Tb427-030030500	Tb427-060005800:pseudogene
Tb427-060054500	Tb427-010029400	Tb427-100088900	Tb427-110045100	Tb427-100044300	Tb427-010032200
Tb427-100052700	Tb427-110174400	Tb427-100106300	Tb427-110105300	Tb427-020030700	Tb427-000746600:pseudogene
Tb427-010011500	Tb427-020025100	Tb427-040009700	Tb427-110106400	Tb427-010028200	Tb427-100150400
Tb427-090021200	Tb427-110080800	Tb427-010010000	Tb427-040023700	Tb427-040027300	Tb427-100069200
Tb427-100041000	Tb427-070059400:pseudogene	Tb427-110013200	Tb427-110071900	Tb427-090063100	Tb427-060007600
Tb427-000245300:pseudogene	Tb427-000107500:pseudogene	Tb427-080049000	Tb427-080041400	Tb427-000107900	Tb427-090051600
Tb427-080035000	Tb427-060043300	Tb427-080020500	Tb427-070010600	Tb427-090069800	Tb427-030019200
Tb427-010031900	Tb427-080058500	Tb427-090059100	Tb427-070059400:pseudogene	Tb427-100154500	Tb427-100015200
Tb427-090021500	Tb427-000749100:pseudogene	Tb427-040031500	Tb427-040031200	Tb427-110140000	Tb427-110122200
Tb427-050036100	Tb427-030007000	Tb427-030017200	Tb427-060037400	Tb427-110057200	Tb427-010032100
Tb427-070082500	Tb427-110179000	Tb427-080084100	Tb427-010022300	Tb427-110163700	Tb427-100058500
Tb427-100062800	Tb427-080028300	Tb427-100157300	Tb427-100107500	Tb427-050028200	Tb427-010024700
Tb427-100035500	Tb427-020019400	Tb427-110066800	Tb427-010019800	Tb427-000814000:pseudogene	Tb427-110102200
Tb427-110066800	Tb427-110036500	Tb427-100090200	Tb427-040026000	Tb427-090087100	Tb427-060040400
Tb427-100139600	Tb427-030012100	Tb427-060046500	Tb427-090055100	Tb427-100145900	Tb427-110141500
Tb427-110085800	Tb427-070062500	Tb427-110101700	Tb427-070036900	Tb427-070036500	Tb427-000017700
Tb427-100160800	Tb427-040022100	Tb427-110118800	Tb427-090007600	Tb427-050018800	Tb427-080026600
Tb427-110140900	Tb427-090070600	Tb427-030052900	Tb427-100144300	Tb427-020030100	Tb427-080089000:pseudogene
Tb427-110161900	Tb427-080013000	Tb427-010013100	Tb427-050033000	Tb427-080069500	Tb427-100013000
Tb427-020021200	Tb427-050013200	Tb427-090013500	Tb427-110142800	Tb427-100107400	Tb427-040023900
Tb427-100036400	Tb427-000485800	Tb427-110130800	Tb427-040030000	Tb427-030047900	Tb427-100020100
Tb427-100132000	Tb427-020024900	Tb427-050037100	Tb427-060037200	Tb427-070013400	Tb427-110008200
Tb427-080064000	Tb427-100027300	Tb427-100040400	Tb427-110081400	Tb427-030048100	Tb427-100128500
Tb427-100099500	Tb427-030007500	Tb427-040056300	Tb427-030044700	Tb427-110173700	Tb427-100019500
Tb427-030055500	Tb427-030043500	Tb427-070036600	Tb427-040010400	Tb427-090076700	Tb427-110172500
Tb427-110139600	Tb427-080061800	Tb427-100156300	Tb427-110079600	Tb427-110048900	Tb427-060038700
Tb427-080042100	Tb427-110044800	Tb427-010032200	Tb427-050033200	Tb427-050022300	Tb427-000311500
Tb427-110130500	Tb427-080024900	Tb427-090034400	Tb427-000653000:pseudogene	Tb427-010010000	Tb427-080076100
Tb427-030047600	Tb427-070064800	Tb427-060036300	Tb427-100053700	Tb427-090057900	Tb427-070077000
Tb427-090070900	Tb427-100013100	Tb427-040026600	Tb427-030042800	Tb427-030054400	Tb427-110064000
Tb427-050036300	Tb427-010010700	Tb427-090048700	Tb427-060031900	Tb427-100038400	Tb427-060054400
Tb427-010032900	Tb427-080036800	Tb427-000497800	Tb427-100149600	Tb427-110104800	Tb427-060043900
Tb427-090006800	Tb427-060012100	Tb427-040034400	Tb427-070082500	Tb427-100060800	Tb427-040023600
Tb427-060034100	Tb427-070045900	Tb427-110057500	Tb427-110127900	Tb427-100062200	Tb427-100113300
Tb427-080005400:pseudogene	Tb427-030056500	Tb427-030050300	Tb427-040050600	Tb427-090058000	Tb427-050035500
Tb427-090085500	Tb427-100089000	Tb427-110085100	Tb427-110165800	Tb427-110037600	Tb427-110063500
Tb427-010011100	Tb427-050044600	Tb427-060039300	Tb427-100040600	Tb427-100011100	Tb427-000481200:pseudogene
Tb427-100129600	Tb427-100036100	Tb427-100016800	Tb427-000805000:pseudogene	Tb427-110123300	Tb427-000801300:pseudogene
Tb427-080049600	Tb427-100040200	Tb427-100143200	Tb427-110108000	Tb427-090072800	Tb427-000840600:pseudogene
Tb427-100076200	Tb427-070076600	Tb427-070079600	Tb427-100149400	Tb427-030009000	Tb427-000347900
Tb427-080026200	Tb427-040028000	Tb427-110023400	Tb427-060041500	Tb427-000245800:pseudogene	Tb427-090014700
Tb427-110088300	Tb427-110138400	Tb427-080023300	Tb427-080027500	Tb427-080066600	Tb427-100137800
Tb427-090043400	Tb427-020010600	Tb427-030042100	Tb427-110099600	Tb427-040050500	Tb427-060032100
Tb427-040044600	Tb427-080074000	Tb427-110166300:pseudogene	Tb427-070036500	Tb427-100077100	Tb427-050025900
Tb427-100144200	Tb427-110032900	Tb427-110172700	Tb427-100108500	Tb427-050051200	Tb427-080028200
Tb427-110100000	Tb427-090092200	Tb427-070027500	Tb427-100138700	Tb427-030014700	Tb427-110126900
Tb427-080060300	Tb427-110143200	Tb427-080031200	Tb427-090029400	Tb427-100044200	Tb427-110051800
Tb427-070069100	Tb427-100101500	Tb427-110046700	Tb427-100108300	Tb427-110043300	Tb427-060034100
Tb427-080006500	Tb427-100154800	Tb427-110153500	Tb427-100140300	Tb427-110122800	Tb427-080038200
Tb427-000311100	Tb427-110035600	Tb427-030006300	Tb427-100127700	Tb427-100153300	Tb427-030035000:pseudogene
Tb427-080055400	Tb427-090083300	Tb427-050041800	Tb427-110126900	Tb427-010027700	Tb427-080036300
Tb427-100106300	Tb427-090044300	Tb427-110059700	Tb427-110166100	Tb427-110024600	Tb427-070006100
Tb427-060031900	Tb427-050005500	Tb427-010028500	Tb427-110048900	Tb427-100084700	Tb427-010031400
Tb427-070041200	Tb427-040006600	Tb427-000680600	Tb427-100024300	Tb427-100026700	Tb427-080012700
Tb427-060010900	Tb427-100163100	Tb427-060019400	Tb427-070049500	Tb427-040021600	Tb427-000274800:pseudogene
Tb427-010016400	Tb427-040039900	Tb427-060011600	Tb427-000639900:pseudogene	Tb427-000481200:pseudogene	Tb427-040008000
Tb427-070055200:pseudogene	Tb427-060017300	Tb427-090068100	Tb427-110005300	Tb427-040017700	Tb427-090040800
Tb427-080063600	Tb427-010006600:pseudogene	Tb427-080016900	Tb427-030021700	Tb427-100057800	Tb427-100149400
Tb427-090043300	Tb427-100107100	Tb427-070007400	Tb427-040018500	Tb427-060029800	Tb427-070071900
Tb427-100124200	Tb427-110132000	Tb427-070072300	Tb427-070061500	Tb427-080048100	Tb427-040045000
Tb427-090048000	Tb427-100099600	Tb427-030020900	Tb427-070058400	Tb427-100160400	Tb427-060011600
Tb427-110006400	Tb427-020016900	Tb427-030047700	Tb427-090072600	Tb427-100114600:pseudogene	Tb427-110177100
Tb427-110164000	Tb427-110079600	Tb427-100069200	Tb427-040016300	Tb427-070022200	Tb427-070063600
Tb427-100105200	Tb427-100049300	Tb427-070047300	Tb427-050048000	Tb427-080020700	Tb427-040035600
Tb427-040056600	Tb427-110007200	Tb427-090034900	Tb427-090023600	Tb427-110120900	Tb427-090008000
Tb427-110165600	Tb427-090012000	Tb427-110101200	Tb427-080088100	Tb427-100161700	Tb427-110069900
Tb427-110053500	Tb427-010007700	Tb427-040029400	Tb427-000794000:pseudogene	Tb427-040052400	Tb427-060043600
Tb427-110040500	Tb427-110056700	Tb427-070020200	Tb427-050031100	Tb427-040009000	Tb427-030005800
Tb427-080087700	Tb427-100073000	Tb427-080046100	Tb427-100042600	Tb427-040050400	Tb427-100037600
Tb427-000501400:pseudogene	Tb427-080037100	Tb427-040025400	Tb427-110138000	Tb427-100162100	Tb427-070010100
Tb427-050039000	Tb427-030040200	Tb427-000285400:pseudogene	Tb427-080062200	Tb427-010022300	Tb427-080077000
Tb427-100027800:pseudogene	Tb427-100100400	Tb427-080070400	Tb427-070069500	Tb427-030019200	Tb427-100067700
Tb427-030056100	Tb427-050030700	Tb427-060031300	Tb427-110150800	Tb427-040023500	Tb427-110092400
Tb427-080005600	Tb427-100129700	Tb427-090063000	Tb427-110173000	Tb427-110010500	Tb427-040018500
Tb427-090058100	Tb427-080011400	Tb427-040051300:pseudogene	Tb427-110134500	Tb427-100127700	Tb427-040033800
Tb427-110181800	Tb427-080080900	Tb427-010021400	Tb427-090013700	Tb427-080040800	Tb427-100170200
Tb427-030020900	Tb427-110164700	Tb427-100095000	Tb427-110125700	Tb427-110151600	Tb427-080056600
Tb427-090046800	Tb427-100031900	Tb427-100147900	Tb427-100009500	Tb427-110188000	Tb427-030034300
Tb427-000497700	Tb427-000637500	Tb427-040032800	Tb427-100168900	Tb427-110124700	Tb427-000696100:pseudogene
Tb427-060034600	Tb427-100169100	Tb427-110122800	Tb427-100101800	Tb427-100055700:pseudogene	Tb427-100033800
Tb427-020015400	Tb427-060015600	Tb427-030049200	Tb427-040034300	Tb427-020017700	Tb427-040027400
Tb427-050021100	Tb427-040053600	Tb427-050010100	Tb427-080037100	Tb427-020021300	Tb427-110086000
Tb427-110007000	Tb427-040019400	Tb427-080029500	Tb427-100163500	Tb427-090030900	Tb427-040027900
Tb427-050016100	Tb427-110122400	Tb427-030039900	Tb427-100164500	Tb427-090089700	Tb427-110093400
Tb427-030008500	Tb427-100140100	Tb427-110070800	Tb427-040008700	Tb427-090062400	Tb427-020028500
Tb427-080046300	Tb427-110173200	Tb427-040032200	Tb427-080008800	Tb427-110046200	Tb427-040015400
Tb427-000673600:pseudogene	Tb427-100169000	Tb427-020017900	Tb427-080058300	Tb427-100048100:pseudogene	Tb427-040036200
Tb427-040012500	Tb427-030040400	Tb427-110056800	Tb427-070071600	Tb427-090007300	Tb427-100097500
Tb427-070077700	Tb427-020013500	Tb427-000840600:pseudogene	Tb427-080035600	Tb427-080077100	Tb427-040031400
Tb427-030020700	Tb427-070035200	Tb427-110064700	Tb427-110032100	Tb427-010012500	Tb427-050038400
Tb427-050037200	Tb427-100131800	Tb427-110024900	Tb427-100137100	Tb427-040055000	Tb427-060017100
Tb427-080024500	Tb427-100156800	Tb427-030059800	Tb427-090051100	Tb427-060047500	Tb427-070005300
Tb427-100093900	Tb427-110183700	Tb427-070055500	Tb427-040038900	Tb427-100037000	Tb427-000516300:pseudogene
Tb427-050013100	Tb427-090057700	Tb427-110182500	Tb427-110091800	Tb427-000174400:pseudogene	Tb427-080024000
Tb427-040025000	Tb427-100031000	Tb427-110132600	Tb427-080012700	Tb427-000516500:pseudogene	Tb427-110168400
Tb427-080019000	Tb427-000173800	Tb427-100154700	Tb427-110010600	Tb427-100072500	Tb427-110176500
Tb427-100109800	Tb427-100011500	Tb427-100015900	Tb427-080056700	Tb427-030049000	Tb427-090081200
Tb427-090068600	Tb427-090046000	Tb427-110005700	Tb427-050017400	Tb427-070063200	Tb427-110019600:pseudogene
Tb427-030014200	Tb427-050036700	Tb427-050046900	Tb427-090086400:pseudogene	Tb427-080046900	Tb427-080028300
Tb427-040030800	Tb427-000702600	Tb427-080040000	Tb427-100055200	Tb427-090086800:pseudogene	Tb427-000107400
Tb427-110178500	Tb427-070081000	Tb427-080062100	Tb427-110152500	Tb427-050009100	Tb427-060019200
Tb427-010016300	Tb427-080058200	Tb427-110166700	Tb427-100015200	Tb427-000285400:pseudogene	Tb427-040042600
Tb427-060032000	Tb427-110163200	Tb427-000544500:pseudogene	Tb427-080077000	Tb427-090077000	Tb427-050045300
Tb427-110152100	Tb427-100136700	Tb427-080048400	Tb427-080054200	Tb427-110044700	Tb427-110182100
Tb427-070010200	Tb427-100160200	Tb427-030042800	Tb427-030029700	Tb427-100146000	Tb427-070013700
Tb427-030018000	Tb427-040010400	Tb427-110063500	Tb427-070030600	Tb427-000015500	Tb427-080063400
Tb427-100107000	Tb427-110028000	Tb427-040039900	Tb427-060033300	Tb427-090037700	Tb427-100090500
Tb427-110102600	Tb427-080064700	Tb427-010014200	Tb427-100068800	Tb427-110140500	Tb427-000311200
Tb427-090011900	Tb427-040054900	Tb427-090088500	Tb427-110051800	Tb427-070036300	MURF2
Tb427-080011500	Tb427-070008600	Tb427-090075800	Tb427-090075100	Tb427-110033300	Tb427-030032800
Tb427-040051900	Tb427-090054700	Tb427-040047000	Tb427-040031000	Tb427-110181700	Tb427-110063100
Tb427-110133700	Tb427-020012400	Tb427-060048400	Tb427-110134600	Tb427-110082300	Tb427-040011400
Tb427-020021400	Tb427-100131900	Tb427-100109900	Tb427-110028900	Tb427-090025200	Tb427-080058900
Tb427-110121700	Tb427-040028700	Tb427-110183500	Tb427-110156600	Tb427-090090100	Tb427-070050500
Tb427-030019300	Tb427-100055300	Tb427-100169100	Tb427-030013300	Tb427-110042600	Tb427-090070600
Tb427-030022600	Tb427-080064500	Tb427-100100100	Tb427-100106700	Tb427-110065700	Tb427-110057100
Tb427-090090200	Tb427-040013000	Tb427-110124800	Tb427-090058700	Tb427-090053500	Tb427-030018000
Tb427-110051500	Tb427-110179500	Tb427-100070800	Tb427-040009700	Tb427-080058300	Tb427-040047300
Tb427-080072200	Tb427-100025500	Tb427-100059400	Tb427-110178000	Tb427-100068500	Tb427-000273200:pseudogene
Tb427-020010200	Tb427-100098400	Tb427-100036200	Tb427-020013200	Tb427-090052500	Tb427-000107900
Tb427-000277700:pseudogene	Tb427-110087900	Tb427-110166400	Tb427-070077000	Tb427-090072000	Tb427-080053500
Tb427-110107200	Tb427-080016700	Tb427-050014400	Tb427-080088700	Tb427-090080600	Tb427-090028000
Tb427-100142900	Tb427-060035500	Tb427-060041900	Tb427-040021700	Tb427-050050200:pseudogene	Tb427-100007400
Tb427-080086800	Tb427-090006900	Tb427-090067100	Tb427-030034800	Tb427-060018900	Tb427-090038100
Tb427-110074200	Tb427-080052700	Tb427-110156300	Tb427-100130600	Tb427-110075000	Tb427-080016800
Tb427-060050300	Tb427-100139000	Tb427-080052100	Tb427-080026600	Tb427-080044600	Tb427-100104100
Tb427-070011200	Tb427-080020300	Tb427-060015800	Tb427-020026500	Tb427-090062300	Tb427-010009100
Tb427-100099800	Tb427-090046100	Tb427-040055000	Tb427-050007700	Tb427-100084900	Tb427-080050100
Tb427-100108300	Tb427-110043800	Tb427-110190100	Tb427-030059500	Tb427-100104600	Tb427-040041200
Tb427-070018100	Tb427-090011300	Tb427-040049800	Tb427-100040900	Tb427-060029400	Tb427-110179900
Tb427-110150700	Tb427-100109800	Tb427-110010700	Tb427-110184000	Tb427-060016200	Tb427-110137700
Tb427-080062400	Tb427-030055600	Tb427-070062200	Tb427-090046100	Tb427-090046900	Tb427-110093800
Tb427-040041300	Tb427-110073600	Tb427-090023000	Tb427-090051600	Tb427-110164500:pseudogene	Tb427-050047700
Tb427-030053000	Tb427-100017300	Tb427-080042300	Tb427-110123700	Tb427-070046800	Tb427-080088600
Tb427-080050800	Tb427-110132300	Tb427-060012700:pseudogene	Tb427-100121200	Tb427-050037700	Tb427-070062900
Tb427-070080000	Tb427-030039100	Tb427-070053600	Tb427-010009800	Tb427-090059900	Tb427-090072000
Tb427-110158100	Tb427-080088100	Tb427-000481200:pseudogene	Tb427-030009700	Tb427-020008700	Tb427-000799700:pseudogene
Tb427-080086500	Tb427-000480900:pseudogene	Tb427-100069600	Tb427-080057200	Tb427-090012600	Tb427-040053200
Tb427-100066600	Tb427-050011500	Tb427-090022000	Tb427-040012600	Tb427-080084600	Tb427-030020000
Tb427-050015400	Tb427-000272500	Tb427-100068700	Tb427-080047400	Tb427-070025200	Tb427-030041200
Tb427-090079900	Tb427-110082100	Tb427-050032200	Tb427-110119600	Tb427-090086600	Tb427-070071500
Tb427-040040700	Tb427-110170200	Tb427-100050300	Tb427-050011300	Tb427-000276400	Tb427-080084200
Tb427-090013200	Tb427-040013600	Tb427-110125600	Tb427-100084500	Tb427-100136200	Tb427-040054800
Tb427-080062200	Tb427-110022600	Tb427-020032300	Tb427-090080400	Tb427-110100600	Tb427-050033800
Tb427-080056800	Tb427-060025800	Tb427-100009100	Tb427-020008400	Tb427-030029700	Tb427-100107800
Tb427-080039200	Tb427-060034500	Tb427-070080400	Tb427-110028000	Tb427-090070000	Tb427-110060500
Tb427-030047800	Tb427-100167600	Tb427-070032100	Tb427-090046500:pseudogene	Tb427-010016200	Tb427-010015500
Tb427-090029500	Tb427-070059600	Tb427-080007300	Tb427-110047000	Tb427-030015800	Tb427-080086500
Tb427-100054600	Tb427-110152400	Tb427-060050400	Tb427-000792800:pseudogene	Tb427-110120200	Tb427-030011400
Tb427-060016400	Tb427-090062100	Tb427-050008300	Tb427-080033300	Tb427-100052400	Tb427-070043700
Tb427-080041500	Tb427-100059900	Tb427-110024500	Tb427-080039700	Tb427-090030600	Tb427-040013200
Tb427-060007500	Tb427-050031800	Tb427-040018000	Tb427-110040300	Tb427-040056300	Tb427-110181000
Tb427-110042800	Tb427-100078600	Tb427-080026700	Tb427-110137600	Tb427-110085600	Tb427-100149900
Tb427-100015800	Tb427-100072800	Tb427-070029300:pseudogene	Tb427-090011300	Tb427-070059100	Tb427-100034000
Tb427-110058100	Tb427-110047800	Tb427-110162000	Tb427-030047900	Tb427-010024600	Tb427-110032000
Tb427-050027000	Tb427-030013700	Tb427-100020100	Tb427-100148700	Tb427-030042400	Tb427-040044000
Tb427-110044600	Tb427-110102300	Tb427-080033300	Tb427-100033800	Tb427-070041100	Tb427-100024000
Tb427-110131200	Tb427-110013900	Tb427-090029400	Tb427-110053600	Tb427-110043900	Tb427-040019600
Tb427-090080400	Tb427-080087200	Tb427-110139000	Tb427-100026000	Tb427-030020800	Tb427-010020200
Tb427-020012100	Tb427-040010800	Tb427-030037500	Tb427-080040000	Tb427-110042700	Tb427-030060000
Tb427-110121400	Tb427-090034000	Tb427-110102600	Tb427-090087000	Tb427-030026900	Tb427-090088200
Tb427-040054500	Tb427-080060400	Tb427-040029000	Tb427-090074900	Tb427-070049200	Tb427-040036500
Tb427-100131800	Tb427-030059900	Tb427-100028800	Tb427-060040400	Tb427-070049100	Tb427-110065200
Tb427-060015400	Tb427-060012300	Tb427-070063600	Tb427-070055400	Tb427-030018700	Tb427-030055800
Tb427-110151200	Tb427-050024800	Tb427-050052300	Tb427-000277200	Tb427-070068600	Tb427-070071700
Tb427-060026700	Tb427-080064800	Tb427-010013000	Tb427-060039300	Tb427-110099600	Tb427-070010300
Tb427-100105900	Tb427-090028300	Tb427-110047000	Tb427-020015600	Tb427-030043300	Tb427-110043800
Tb427-100135000	Tb427-060012200	Tb427-110102300	Tb427-100133700	Tb427-070044300	Tb427-060034700
Tb427-060008000	Tb427-090047300	Tb427-110158400	Tb427-080057100	Tb427-060009500	Tb427-060044000
Tb427-100056900	Tb427-100151100	Tb427-080031500	Tb427-040042900	Tb427-030032800	Tb427-000481600:pseudogene
Tb427-020009100	Tb427-110186600	Tb427-100137100	Tb427-080045200	Tb427-070028900	Tb427-110100700
Tb427-050027500	Tb427-090084400	Tb427-110151900	Tb427-020016500	Tb427-030016800	Tb427-060050200
Tb427-100094700	Tb427-110171300	Tb427-100051900	Tb427-060033900	Tb427-100100000	Tb427-000008100:pseudogene
Tb427-050035100	Tb427-030019500	Tb427-100049500	Tb427-110050400	Tb427-040006100	Tb427-000695900:pseudogene
Tb427-090075500	Tb427-000107400	Tb427-090039600	Tb427-030015700	Tb427-050031200	Tb427-010013300
Tb427-070008600	Tb427-050041000	Tb427-110184100	Tb427-050025900	Tb427-080069900	Tb427-110164000
Tb427-090013500	Tb427-100125300	Tb427-110086000	Tb427-030010300	Tb427-100127000	Tb427-020024500
Tb427-070006600	Tb427-080065500	Tb427-110089600	Tb427-090066600	Tb427-070016100	Tb427-080011400
Tb427-070011800	Tb427-100041900	Tb427-030019500	Tb427-090092900	Tb427-080052800	Tb427-110086400
Tb427-100100500	Tb427-100032200	Tb427-000276300	Tb427-100064100	Tb427-100113800	Tb427-100084300
Tb427-110007300	Tb427-070006500	Tb427-050016500	Tb427-040049800	Tb427-050048100	Tb427-080006700
Tb427-100082000	Tb427-060032700	Tb427-000696100:pseudogene	Tb427-100155000	Tb427-110063100	Tb427-080021600
Tb427-060045600	Tb427-070020800	Tb427-080026800	Tb427-000285300	Tb427-090078800	Tb427-020005700
Tb427-020005300	Tb427-050032800	Tb427-070060900	Tb427-100023800	Tb427-050016200	Tb427-080039600
Tb427-040029000	Tb427-070060600	Tb427-060043100	Tb427-100101100	Tb427-060052500:pseudogene	Tb427-110164400
Tb427-070076900	Tb427-080042800	Tb427-110082200	Tb427-100019800	Tb427-080011200	Tb427-110140000
Tb427-040017500	Tb427-100162600	Tb427-100072200	Tb427-050026900	Tb427-100043600	Tb427-070052100
Tb427-110160200	Tb427-100117200	Tb427-090048200	Tb427-100131900	Tb427-100070900	Tb427-080085200
Tb427-080049200	Tb427-050027100	Tb427-100140900	Tb427-110131200	Tb427-060011900	Tb427-110033200
Tb427-090039700	Tb427-100033700	Tb427-100135500	Tb427-050035500	Tb427-030042700	Tb427-030014700
Tb427-100106000	Tb427-060053400	Tb427-100130700	Tb427-050032800	Tb427-090080300	Tb427-090079600
Tb427-110185000	Tb427-040018500	Tb427-030007600	Tb427-060016400	Tb427-040008700	Tb427-080081500
Tb427-100068300	Tb427-110175600	Tb427-110163200	Tb427-010030200	Tb427-050052600	Tb427-110107800
Tb427-100032700	Tb427-040021400	Tb427-080007800	Tb427-110156000	Tb427-090036300	Tb427-110154300
Tb427-110044800	Tb427-080078000	Tb427-100140000	Tb427-110118800	Tb427-070020700	Tb427-070054100
Tb427-100076400	Tb427-060009200	Tb427-080016600	Tb427-100005900	Tb427-100063800:pseudogene	Tb427-070050900
Tb427-070009800	Tb427-040031700	Tb427-100145600	Tb427-100127500	Tb427-110094600	Tb427-100071700
Tb427-070031600	Tb427-100108000	Tb427-090066300	Tb427-070079700	Tb427-100054900	Tb427-100087700
Tb427-080062800	Tb427-030020400	Tb427-030010500	Tb427-080036300	Tb427-010032600	Tb427-090062700
Tb427-030029600	Tb427-040054300	Tb427-100113400	Tb427-090062200	Tb427-040018700	Tb427-000015600:pseudogene
Tb427-050007100	Tb427-050053500	Tb427-080068700	Tb427-090078500	Tb427-110098700	Tb427-100120500
Tb427-020016000	Tb427-080030100	Tb427-090051900	Tb427-110176300	Tb427-110063500	Tb427-090021600
Tb427-020025500	Tb427-050046000	Tb427-000794000:pseudogene	Tb427-030058600	Tb427-080088600	Tb427-030055400
Tb427-060050400	Tb427-060042000	Tb427-050031200	Tb427-040045000	Tb427-090051900	Tb427-020030700
Tb427-090030300	Tb427-090072100	Tb427-110008200	Tb427-090027400	Tb427-070026000	Tb427-090092100
Tb427-040011200	Tb427-070024000	Tb427-000015200:pseudogene	Tb427-050024800	Tb427-090015000	Tb427-110005400
Tb427-040029700	Tb427-110056800	Tb427-060024000	Tb427-110161000	Tb427-080069400	Tb427-110123600
Tb427-010014200	Tb427-070072500	Tb427-110062500	Tb427-110102800	Tb427-070040500	Tb427-100024200
Tb427-110119200	Tb427-080010400	Tb427-090071800	Tb427-020027200	Tb427-070063500	Tb427-100038200
Tb427-090005500	Tb427-070043800	Tb427-090076500	Tb427-060034100	Tb427-110060200	Tb427-040017000
Tb427-000015100	Tb427-100022200	Tb427-090057100	Tb427-060018700	Tb427-090007000	Tb427-060055600
Tb427-100080400	Tb427-050027000	Tb427-070050800	Tb427-040056000	Tb427-010032200	Tb427-100027100
Tb427-080058900	Tb427-110185700	Tb427-110047600	Tb427-110039300	Tb427-090040100	Tb427-090090700
Tb427-110164600	Tb427-030059100	Tb427-100122000	Tb427-080064300	Tb427-100087200	Tb427-040032600
Tb427-090069100	Tb427-110100400	Tb427-070069700	Tb427-070046800	Tb427-090039400	Tb427-110140300
Tb427-030047500	Tb427-030024600	Tb427-110090000	Tb427-060037500	Tb427-060043900	Tb427-000765700
Tb427-050041000	Tb427-090071600	Tb427-070058300	Tb427-000673600:pseudogene	Tb427-090069300	Tb427-100150600
Tb427-110092400	Tb427-100019100	Tb427-070011200	Tb427-100045800	Tb427-110167100	Tb427-070015400
Tb427-050046900	Tb427-060029200	Tb427-090007700	Tb427-100008500	Tb427-110043100	Tb427-000851600
Tb427-100025600:pseudogene	Tb427-100065000	Tb427-090027200	Tb427-100094500	Tb427-110090300	Tb427-000835100
Tb427-110036900	Tb427-010028600	Tb427-090088700	Tb427-110094400	Tb427-080087600	Tb427-080009100
Tb427-080033500	Tb427-040025600	Tb427-100151000	Tb427-100053800	Tb427-090072400	Tb427-050012800
Tb427-090012700	Tb427-110137000	Tb427-090035600	Tb427-060035000	Tb427-100063200	Tb427-050012900
Tb427-110023300	Tb427-010024800	Tb427-100158400	Tb427-030052300	Tb427-100161100	Tb427-060008700:pseudogene
Tb427-110007800	Tb427-040025900	Tb427-070082600	Tb427-000721800:pseudogene	Tb427-090090300	Tb427-080050400
Tb427-100132600	Tb427-100165000	Tb427-110037000	Tb427-060029900	Tb427-110135800	Tb427-060055700
Tb427-040029100	Tb427-110165500	Tb427-110110400	Tb427-080077400	Tb427-030051600	Tb427-110028600
Tb427-080086300:pseudogene	Tb427-110057100	Tb427-100105500	Tb427-110064100	Tb427-080029100	Tb427-060025300
Tb427-090057000	Tb427-030058500	Tb427-080072000	Tb427-110149500	Tb427-050020500	Tb427-090083000
Tb427-060035500	Tb427-080066400	Tb427-090039200	Tb427-030005600:pseudogene	Tb427-080007700	Tb427-100125200
Tb427-050006200	Tb427-080028500	Tb427-000245300:pseudogene	Tb427-040012500	Tb427-110061500	Tb427-030024500
Tb427-110108000	Tb427-100140200	Tb427-110048900	Tb427-090092200	Tb427-100130700	Tb427-110184300
Tb427-000277200	Tb427-020026500	Tb427-020013500	Tb427-110102600	Tb427-100169500	Tb427-040027000
Tb427-110073900	Tb427-100047000	Tb427-040019400	Tb427-080038100	Tb427-000635000:pseudogene	Tb427-080035400
Tb427-020008300	Tb427-010030300	Tb427-060054300	Tb427-080088200	Tb427-090007100	Tb427-100108700
Tb427-100155000	Tb427-060047100	Tb427-110162100	Tb427-110141500	Tb427-110149000	Tb427-080043300
Tb427-080059000	Tb427-100040400	Tb427-030038500	Tb427-030030000	Tb427-030041100	Tb427-100048300
Tb427-050012600	Tb427-070047600	Tb427-090036300	Tb427-040036800	Tb427-010023700	Tb427-100063200
Tb427-090029200	Tb427-070013000	Tb427-110088800	Tb427-110122600	Tb427-100055500	Tb427-100133900:pseudogene
Tb427-050008400	Tb427-050013300	Tb427-040036400	Tb427-110174000	Tb427-000349300	Tb427-030007100
Tb427-110124900	Tb427-090060300	Tb427-110164700	Tb427-110046000	Tb427-100140900	Tb427-040021100
Tb427-040025100	Tb427-090072900	Tb427-090015000	Tb427-100034800	Tb427-030030900	Tb427-100134800
Tb427-110126500	Tb427-030048600	Tb427-100012300	Tb427-020019200	Tb427-110156500	Tb427-060020800:pseudogene
Tb427-090046500:pseudogene	Tb427-030043100	Tb427-100151100	Tb427-040024000	Tb427-110174800	Tb427-100143800
Tb427-100046700	Tb427-050051500	Tb427-070027300	Tb427-100098600	Tb427-100135300	Tb427-060009500
Tb427-090048400	Tb427-100022700	Tb427-030034300	Tb427-070079900	Tb427-100026300	Tb427-050025800
Tb427-100098200	Tb427-070008200	Tb427-100019500	Tb427-100060000	Tb427-030014000	Tb427-050007500:pseudogene
Tb427-110013600	Tb427-060010500	Tb427-090084400	Tb427-110162100	Tb427-100031600	Tb427-060030400
Tb427-050025700	Tb427-090080800	Tb427-090037700	Tb427-050046200	Tb427-040015400	Tb427-100161700
Tb427-030037200	Tb427-110156300	Tb427-110104800	Tb427-100063800:pseudogene	Tb427-110169200	Tb427-110039500
Tb427-090057700	Tb427-060042800	Tb427-090042600	Tb427-060056400	Tb427-090044000	Tb427-110134200
Tb427-010014000	Tb427-070027500	Tb427-080049400	Tb427-110101800	Tb427-110128200	Tb427-100064700
Tb427-100034000	Tb427-020020300	Tb427-110065100	Tb427-050046400	Tb427-110080200	Tb427-100078600
Tb427-080089000:pseudogene	Tb427-110064800	Tb427-100065900	Tb427-100097500	Tb427-040026600	Tb427-100157800
Tb427-070078300	Tb427-080009600	Tb427-000638200	Tb427-110128500	Tb427-050008300	Tb427-100127800
Tb427-070078100	Tb427-110158900	Tb427-000746600:pseudogene	Tb427-070039800	Tb427-100080500	Tb427-110016700
Tb427-040009600	Tb427-070036800	Tb427-100117500	Tb427-110120200	Tb427-030012800	Tb427-020011600
Tb427-020024000	Tb427-050042900	Tb427-110035900	Tb427-100126800	Tb427-070034800	Tb427-090072700
Tb427-110153500	Tb427-110156400	Tb427-100078500	Tb427-090068300	Tb427-090021800	Tb427-070081000
Tb427-040021300	Tb427-060056400	Tb427-080013300	Tb427-060007700	Tb427-040008600	Tb427-070078200
Tb427-080019900	Tb427-070080800	Tb427-060022900	Tb427-100088500	Tb427-110064000	Tb427-100125800
Tb427-050008800	Tb427-000834900	Tb427-100126300	Tb427-080059100	Tb427-090078000	Tb427-080077100
Tb427-020028500	Tb427-010026700	Tb427-010012000	Tb427-070041900	Tb427-030059400	Tb427-040037500
Tb427-090012100	Tb427-080038200	Tb427-040031000	Tb427-040017200	Tb427-030052300	Tb427-110037900
Tb427-100163400	Tb427-070016600	Tb427-110099500	Tb427-090090600	Tb427-100126600	Tb427-110181700
Tb427-070060600	Tb427-100039800	Tb427-040033300	Tb427-070082000	Tb427-090087000	Tb427-080006300
Tb427-040042500	Tb427-030041000	Tb427-100169600	Tb427-100119900	Tb427-110150900	Tb427-100072900
Tb427-070032100	Tb427-100043200	Tb427-070041300	Tb427-110159500	Tb427-020022400	Tb427-070009600
Tb427-090088700	Tb427-040053100	Tb427-100068600:pseudogene	Tb427-070005400	Tb427-060046500	Tb427-110060200
Tb427-080046600	Tb427-100125400	Tb427-010010800	Tb427-040007100	Tb427-090022500	Tb427-100100400
Tb427-030044300	Tb427-080064200	Tb427-060040500	Tb427-070007100	Tb427-100152900	Tb427-080039300
Tb427-110067100	Tb427-100084300	Tb427-100098700	Tb427-060043900	Tb427-110068300	Tb427-090055200
Tb427-110131900	Tb427-060037100	Tb427-110163400	Tb427-050017100	Tb427-100078100	Tb427-090049900
Tb427-110123900	Tb427-110135000	Tb427-040052000	Tb427-040032200	Tb427-050038500	Tb427-080046900
Tb427-080039100	Tb427-080059200	Tb427-080088900	Tb427-090057200	Tb427-040031100	Tb427-110038000
Tb427-030038200	Tb427-070036600	Tb427-110028200	Tb427-080087000	Tb427-000274800:pseudogene	Tb427-040051900
Tb427-090068300	Tb427-100023500:pseudogene	Tb427-050030300	Tb427-080078000	Tb427-060056000	Tb427-110055100
Tb427-110119100	Tb427-110025900	Tb427-050021700	Tb427-110047900	Tb427-060014800	Tb427-110085700
Tb427-040054100	Tb427-100050600	Tb427-110158300	Tb427-100104100	Tb427-070079200	Tb427-090058200
Tb427-090040400	Tb427-110012500	Tb427-070059400:pseudogene	Tb427-080052100	Tb427-090052400	Tb427-070032700
Tb427-040011700	Tb427-080024000	Tb427-090040100	Tb427-110090500	Tb427-110018700	Tb427-040005400
Tb427-100119700	Tb427-090090600	Tb427-000639900:pseudogene	Tb427-030005800	Tb427-100144500	Tb427-110167100
Tb427-080056200	Tb427-100064300	Tb427-030030700	Tb427-040027900	Tb427-050046100	Tb427-040030600
Tb427-110027000	Tb427-100067700	Tb427-060032100	Tb427-100030700	Tb427-030012000	Tb427-090024400
Tb427-090026600	Tb427-070058300	Tb427-040033700	Tb427-090081100	Tb427-110119500	Tb427-090040700
Tb427-050011100	Tb427-090083900	Tb427-050017400	Tb427-070009800	Tb427-110060000	Tb427-090046700
Tb427-000108500	Tb427-060026000	Tb427-050051500	Tb427-070006800	Tb427-030034000	Tb427-100054700
Tb427-110145500	Tb427-100029600	Tb427-100021200	Tb427-090062500	Tb427-070077500	Tb427-020005300
Tb427-060038300	Tb427-080039800	Tb427-080042700	Tb427-100041000	Tb427-090056100	Tb427-030042700
Tb427-090051200	Tb427-050052400	Tb427-110106700	Tb427-100035100	Tb427-040018000	Tb427-030056500
Tb427-110187000	Tb427-100103000	Tb427-040037100	Tb427-010028300	Tb427-110159000	Tb427-070059100
Tb427-060033300	Tb427-080027300	Tb427-110135000	Tb427-030035000:pseudogene	Tb427-110063800	Tb427-100136000
Tb427-110137600	Tb427-100090000	Tb427-110074300	Tb427-060020200	Tb427-060016000	Tb427-060039500
Tb427-030007900	Tb427-070061700	Tb427-100013000	Tb427-040007700	Tb427-080071000	Tb427-100078900
Tb427-090020100	Tb427-110059300	Tb427-000673600:pseudogene	Tb427-060025600	Tb427-070073500	Tb427-110159900
Tb427-030045300	Tb427-090051100	Tb427-100078000	Tb427-040035600	Tb427-030016100	Tb427-070031300
Tb427-110061700	Tb427-110024000	Tb427-070069500	Tb427-110037600	Tb427-090048300	Tb427-100022200
Tb427-100010100	Tb427-030030800	Tb427-100057000	Tb427-010028900	Tb427-110033600	Tb427-040043500
Tb427-110030900	Tb427-080030700	Tb427-110166500	Tb427-020031500	Tb427-080044400	Tb427-090076200
Tb427-110091700	Tb427-110168500	Tb427-050011300	Tb427-030033100	Tb427-000720800:pseudogene	Tb427-060039100
Tb427-090075100	Tb427-110171400	Tb427-080027100	Tb427-030050200	Tb427-050041100	Tb427-080072300
Tb427-100153700:pseudogene	Tb427-030019600	Tb427-090061200	Tb427-050007200	Tb427-000198100:pseudogene	Tb427-070078300
Tb427-000109100	Tb427-110046300	Tb427-070012700	Tb427-100096500	Tb427-050007700	Tb427-040030900
Tb427-070070100	Tb427-070059200	Tb427-080026500	Tb427-060016800	Tb427-080034900	Tb427-000015300
Tb427-110010100	Tb427-030059600	Tb427-090034000	Tb427-000516500:pseudogene	Tb427-040054700	Tb427-100085800
Tb427-030016400	Tb427-110063400	Tb427-090051300	Tb427-110182100	Tb427-060047300	Tb427-080049600
Tb427-080050700	Tb427-100046700	Tb427-050005800	Tb427-080047800	9S-rRNA	Tb427-100050100:pseudogene
Tb427-100089400	Tb427-110037700	Tb427-110028300	Tb427-110060900	Tb427-030016600	Tb427-090087600
Tb427-110085100	Tb427-100043500	Tb427-080060400	Tb427-030031600	Tb427-040018200	Tb427-040040100
Tb427-010011000	Tb427-080081400	Tb427-110024700	Tb427-110046600	Tb427-100052700	Tb427-050033700
Tb427-110156400	Tb427-070072000	Tb427-090040800	Tb427-010017000	Tb427-110174400	Tb427-040054300
Tb427-070017900:pseudogene	Tb427-110132700	Tb427-110020500	Tb427-060031800	Tb427-100041000	Tb427-080038600
Tb427-100169400	Tb427-090011400	Tb427-110014700	Tb427-100076700	Tb427-010031900	Tb427-080066200
Tb427-050014000	Tb427-090071900	Tb427-010021900	Tb427-080045900	Tb427-050036100	Tb427-080008600
Tb427-000174700	Tb427-090030400	Tb427-110024000	Tb427-100016100	Tb427-070082500	Tb427-100164200
Tb427-080058500	Tb427-090083700	Tb427-060037100	Tb427-070062000	Tb427-080028300	Tb427-100109800
Tb427-100038300	Tb427-090032700	Tb427-070007100	Tb427-000655300:pseudogene	Tb427-110036500	Tb427-110047300
Tb427-090056600	Tb427-100062700	Tb427-110063900	Tb427-090058800	Tb427-030012100	Tb427-100038800
Tb427-100132400	Tb427-050037900	Tb427-090014700	Tb427-020011800	Tb427-100139600	Tb427-070077600
Tb427-110166100	Tb427-100096600	Tb427-030011100	Tb427-110172500	Tb427-080013000	Tb427-090042700
Tb427-100145100	Tb427-010031500	Tb427-000801300:pseudogene	Tb427-040018200	Tb427-110161900	Tb427-010020100
Tb427-110102500	Tb427-010015600	Tb427-080037800	Tb427-110158300	Tb427-020021200	Tb427-090007800
Tb427-050037100	Tb427-050021400	Tb427-080054200	Tb427-070054900	Tb427-050013200	Tb427-020008300
Tb427-030007500	Tb427-110039700	Tb427-070055800	Tb427-090070600	Tb427-110139600	Tb427-090079900
Tb427-110024200	Tb427-030027700	Tb427-090090800	Tb427-060037600	Tb427-060012100	Tb427-010015000
Tb427-080028500	Tb427-110122900	Tb427-040016200	Tb427-070023700	Tb427-080049600	Tb427-100044200
Tb427-070015200	Tb427-050022500	Tb427-070056800	Tb427-050052300	Tb427-100040200	Tb427-060043800
Tb427-060040100	Tb427-080007100	Tb427-070078600	Tb427-080016300:pseudogene	Tb427-040044600	Tb427-040021600
Tb427-110152400	Tb427-100148000	Tb427-030022300	Tb427-060017000	Tb427-080074000	Tb427-080064000
Tb427-100170800	Tb427-110084400	Tb427-030058500	Tb427-100051000	Tb427-110032900	Tb427-100104700
Tb427-070012300	Tb427-040014800	Tb427-100127900	Tb427-070031800	Tb427-090092200	Tb427-080039200
Tb427-070062300	Tb427-110184500	Tb427-070019300	Tb427-080041500	Tb427-110143200	Tb427-100070000
Tb427-070042400	Tb427-060039000	Tb427-070079000	Tb427-070022400	Tb427-100154800	Tb427-110098700
Tb427-080044700	Tb427-060018500	Tb427-100022600	Tb427-100051100	Tb427-110035600	Tb427-100134600
Tb427-110084100	Tb427-070077000	Tb427-060007000:pseudogene	Tb427-090081200	Tb427-090044300	Tb427-110144500
Tb427-100120500	Tb427-080023200	Tb427-020022400	Tb427-100080300	Tb427-100163100	Tb427-090020500
Tb427-040015100	Tb427-110086500	Tb427-070013800	Tb427-110091100	Tb427-100124200	Tb427-110093700
Tb427-080079600	Tb427-110081100:pseudogene	Tb427-010006000	Tb427-080084400	Tb427-110132000	Tb427-080085800
Tb427-050017000	Tb427-020016300	Tb427-080083100	Tb427-060040000	Tb427-020016900	Tb427-110126500
Tb427-090037000	Tb427-090039600	Tb427-060033300	Tb427-110018100	Tb427-110006400	Tb427-090058900
Tb427-040039700	Tb427-040034300	Tb427-080089000:pseudogene	Tb427-080013300	Tb427-100100400	Tb427-090058400
Tb427-000804200:pseudogene	Tb427-070052700	Tb427-040030700	Tb427-040051200	Tb427-080011400	Tb427-100026700
Tb427-040005200	Tb427-060044000	Tb427-030056800	Tb427-090061400	Tb427-090058100	Tb427-100125900
Tb427-110173300	Tb427-110183100	Tb427-110141400	Tb427-110138400	Tb427-060034600	Tb427-110058100
Tb427-080076900	Tb427-110044600	Tb427-080080900	Tb427-070016400	Tb427-020015400	Tb427-110124700
Tb427-040051600	Tb427-020017200	Tb427-000578800	Tb427-070071900	Tb427-110007000	Tb427-110058400
Tb427-100147100	Tb427-060050500	Tb427-050035700	Tb427-080010200:pseudogene	Tb427-110173200	Tb427-020016300
Tb427-030015700	Tb427-040044000	Tb427-110119400	Tb427-110068300	Tb427-030040400	Tb427-090050000
Tb427-110139400	Tb427-090089200	Tb427-110155100	Tb427-090050800	Tb427-070035200	Tb427-110142400
Tb427-030048700	Tb427-050014400	Tb427-110169400	Tb427-080058900	Tb427-100156800	Tb427-110092200
Tb427-110167300	Tb427-010020000	Tb427-110010800	Tb427-050041100	Tb427-110183700	Tb427-090046900
Tb427-110119800	Tb427-110189200	Tb427-080037100	Tb427-110064000	Tb427-100031000	Tb427-110056300
Tb427-060038000	Tb427-110172000	Tb427-080074100	Tb427-100012500	Tb427-100011500	Tb427-080006600
Tb427-080030100	Tb427-010022000	Tb427-100131500	Tb427-000107400	Tb427-050036700	Tb427-070016200
Tb427-090089400	Tb427-110062500	Tb427-090057200	Tb427-110131600	Tb427-040030800	Tb427-100107400
Tb427-060015300	Tb427-090091400	Tb427-070039900	Tb427-040016700	Tb427-100160200	Tb427-110085400
Tb427-070072300	Tb427-110007800	Tb427-110130900	Tb427-100137800	Tb427-100107000	Tb427-100020700
Tb427-080026100	Tb427-110123800	Tb427-100027300	Tb427-100060700	Tb427-040051900	Tb427-010009300
Tb427-050047700	Tb427-050033100	Tb427-090088900	Tb427-110094100	Tb427-110121700	Tb427-100106900
Tb427-010005900	Tb427-000683500	Tb427-020026500	Tb427-070012200	Tb427-030022600	Tb427-110167800
Tb427-080038200	Tb427-100066100	Tb427-110023300	Tb427-070077700	Tb427-090090200	Tb427-060020100
Tb427-010015200	Tb427-110143500	Tb427-100159900	Tb427-110138500	Tb427-110051500	Tb427-040026300
Tb427-090058200	Tb427-000754700:pseudogene	Tb427-110154600	Tb427-000516300:pseudogene	Tb427-080016700	Tb427-050045700
Tb427-090052300	Tb427-080030400	Tb427-000017700	Tb427-060040700	Tb427-080086800	Tb427-080033100
Tb427-110081400	Tb427-090067800	Tb427-100040800	Tb427-110087900	Tb427-080052700	Tb427-110138800
Tb427-100158200	Tb427-100040600	Tb427-100146200	Tb427-080083000	Tb427-060050300	Tb427-070017900:pseudogene
Tb427-110168500	Tb427-010008600	Tb427-090092200	Tb427-070010900	Tb427-070011200	Tb427-090048300
Tb427-020019400	Tb427-110053000:pseudogene	Tb427-010020300	Tb427-110124100	Tb427-080020300	Tb427-110059200
Tb427-110065100	Tb427-100009200	Tb427-030060100	Tb427-090023200	Tb427-110043800	Tb427-090011900
Tb427-090014100:pseudogene	Tb427-100093500	Tb427-040050900	Tb427-100009400	Tb427-110150700	Tb427-020027800
Tb427-000107300:pseudogene	Tb427-100077200	Tb427-040009100	Tb427-110055900	Tb427-080062400	Tb427-010028600
Tb427-110153000	Tb427-010016400	Tb427-080048100	Tb427-090079500	Tb427-000480900:pseudogene	Tb427-030015300
Tb427-050039700	Tb427-080025200	Tb427-090056300	Tb427-070062200	Tb427-110170200	Tb427-070062800
Tb427-100056200	Tb427-040010700	Tb427-090025800	Tb427-100089400	Tb427-110042800	Tb427-100107700
Tb427-090044500:pseudogene	Tb427-080034200	Tb427-040029200	Tb427-100111000	Tb427-110047800	Tb427-070011600
Tb427-100127900	Tb427-040040500	Tb427-070017700	Tb427-090088900	Tb427-090080400	Tb427-070046000
Tb427-040017000	Tb427-040005000	Tb427-070007800	Tb427-030031100	Tb427-110121400	Tb427-070079200
Tb427-060016500	Tb427-090057200	Tb427-060025900	Tb427-040044400	Tb427-110151200	Tb427-110171400
Tb427-080066400	Tb427-000015400	Tb427-030032800	Tb427-090046800	Tb427-060012200	Tb427-070036000
Tb427-090014900	Tb427-100108200	Tb427-110165000	Tb427-110032300	Tb427-100135000	Tb427-060052200
Tb427-100021500	Tb427-020025700	Tb427-110077600	Tb427-050038800	Tb427-020009100	Tb427-080038900
Tb427-100144400	Tb427-060056200	Tb427-080038200	Tb427-030007600	Tb427-090075500	Tb427-010029500
Tb427-040047100	Tb427-090037200	Tb427-060047400	Tb427-030019200	Tb427-100125300	Tb427-070030100
Tb427-070025500	Tb427-100084100	Tb427-070062600	Tb427-040029500	Tb427-080065500	Tb427-110134300
Tb427-040007400	Tb427-070079000	Tb427-110121300	Tb427-020022400	Tb427-100100500	Tb427-010010700
Tb427-030020000	Tb427-110078800	Tb427-060019200	Tb427-090091300	Tb427-070006500	Tb427-070006300
Tb427-080023100	Tb427-090061200	Tb427-100013900	Tb427-060015200	Tb427-110007300	Tb427-110091400
Tb427-110122000	Tb427-090070300	Tb427-070068900	Tb427-110084800:pseudogene	Tb427-060045600	Tb427-080020200
Tb427-080079100	Tb427-100083900	Tb427-030059500	Tb427-100110900	Tb427-020005300	Tb427-080017800
Tb427-080049100	Tb427-110055400	Tb427-100089300	Tb427-070031400	Tb427-060053400	Tb427-080084600
Tb427-070080900	Tb427-110071700	Tb427-030007800	Tb427-060043600	Tb427-040018500	Tb427-110036800
Tb427-070079300	Tb427-070021000:pseudogene	Tb427-040049400	Tb427-110014400	Tb427-110175600	Tb427-100149800
Tb427-100170400	Tb427-060046200	Tb427-110182900	Tb427-100129200	Tb427-100032700	Tb427-060053500
Tb427-110143800	Tb427-090008700	Tb427-070006900	Tb427-050038400	Tb427-080078000	Tb427-080024500
Tb427-040034100	Tb427-110169700	Tb427-040023600	Tb427-100034600	Tb427-080062800	Tb427-110035600
Tb427-020016500	Tb427-010014300	Tb427-070025300	Tb427-040023900	Tb427-050007100	Tb427-110109100
Tb427-040053200	Tb427-110065800	Tb427-110100200	Tb427-090008700	Tb427-050053500	Tb427-020021300
Tb427-030044800	Tb427-070025700	Tb427-020010300	Tb427-080035200	Tb427-060042000	Tb427-080071000
Tb427-100113300	Tb427-110017500	Tb427-080016800	Tb427-040015400	Tb427-060050400	Tb427-040040200
Tb427-100031300	Tb427-040039000	Tb427-110185000	Tb427-110087700	Tb427-090005500	Tb427-110178400
Tb427-040028800	Tb427-100054600	Tb427-100145800	Tb427-050026800	Tb427-100022200	Tb427-060032200:pseudogene
Tb427-100071300	Tb427-110050700	Tb427-060038700	Tb427-100051400	Tb427-100080400	Tb427-110158200
Tb427-090079400	Tb427-000404400:pseudogene	Tb427-050045300	Tb427-110130400	Tb427-030024600	Tb427-110160100
Tb427-080041400	Tb427-110066800	Tb427-100027500	Tb427-070080900	Tb427-030047500	Tb427-090051200
Tb427-030011100	Tb427-110150200	Tb427-040008200	Tb427-020028500	Tb427-090071600	Tb427-080011700
Tb427-090014700	Tb427-090066500	Tb427-040026200	Tb427-110016800	Tb427-110092400	Tb427-030022700
Tb427-080069700	Tb427-030041600	Tb427-000497700	Tb427-000835300	Tb427-010028600	Tb427-090062400
Tb427-110081700	Tb427-110079900	Tb427-110050400	Tb427-050011200	Tb427-110023300	Tb427-110080800
Tb427-110039300	Tb427-040018800	Tb427-030054400	Tb427-110052500	Tb427-100165000	Tb427-070048100
Tb427-060045100	Tb427-090006600	Tb427-080065600	Tb427-090007300	Tb427-030058500	Tb427-100171000
Tb427-000783900	Tb427-080060300	Tb427-080053500	Tb427-090027200	Tb427-110108000	Tb427-060054500
Tb427-090064100	Tb427-050023300	Tb427-060026700	Tb427-060007600	Tb427-020026500	Tb427-080034500
Tb427-110141900	Tb427-080073000	Tb427-110016800	Tb427-100017300	Tb427-100047000	Tb427-100077200
Tb427-050043200	Tb427-090056400	Tb427-060018500	Tb427-040028200	Tb427-080059000	Tb427-110150700
Tb427-080007200	Tb427-070067200	Tb427-110143300	Tb427-100015700	Tb427-090060300	Tb427-110154000
Tb427-100129800	Tb427-030048900	Tb427-080067800	Tb427-080050100	Tb427-110124900	Tb427-040017900
Tb427-100072100	Tb427-030045700	Tb427-070046300	Tb427-030011200	Tb427-110126500	Tb427-020022500
Tb427-030022700	Tb427-110153300	Tb427-090005500	Tb427-060031600	Tb427-030043100	Tb427-100118700
Tb427-070038800	Tb427-050016100	Tb427-110039200	Tb427-010023800	Tb427-090046500:pseudogene	Tb427-110135100
Tb427-080024900	Tb427-110120100	Tb427-070020600	Tb427-090039300	Tb427-070008200	Tb427-040016100
Tb427-010005500	Tb427-070017300	Tb427-110152500	Tb427-100080600	Tb427-100098200	Tb427-090058100
Tb427-050037500	Tb427-060026700	Tb427-050006700	Tb427-100018800	Tb427-060010500	Tb427-100136200
Tb427-060040400	Tb427-000678800	Tb427-080056600	Tb427-100169800	Tb427-050025700	Tb427-030032000
Tb427-060025600	Tb427-080057100	Tb427-080064700	Tb427-040014700:pseudogene	Tb427-090080800	Tb427-070019700
Tb427-110179800	Tb427-110123000	Tb427-030031600	Tb427-100105500	Tb427-010014000	Tb427-040025000
Tb427-110156700	Tb427-110056200	Tb427-080024000	Tb427-110148100	Tb427-110064800	Tb427-010014800
Tb427-110122600	Tb427-090035900	Tb427-030055500	Tb427-000276400	Tb427-070036800	Tb427-020007900
Tb427-110107700	Tb427-090068300	Tb427-060054400	Tb427-100052300	Tb427-040021300	Tb427-040006400
Tb427-030057100	MURF2	Tb427-020026800	Tb427-000274800:pseudogene	Tb427-040042500	Tb427-030016000
Tb427-090018900	Tb427-000792800:pseudogene	Tb427-030011300	Tb427-110179900	Tb427-030044300	Tb427-110165500
Tb427-110096500	Tb427-080076400	Tb427-090064800	Tb427-100048100:pseudogene	Tb427-080064200	Tb427-060018400
Tb427-060038400	Tb427-090017100	Tb427-000772200	Tb427-020023300	Tb427-110123900	Tb427-110185300
Tb427-110073600	Tb427-080035600	Tb427-110005900	Tb427-090014500	Tb427-080059200	Tb427-080078100
Tb427-100057100	Tb427-110134100	Tb427-080025000	Tb427-070058300	Tb427-100050600	Tb427-100096100
Tb427-050039900	Tb427-100015900	Tb427-080044800	Tb427-110186900	Tb427-110012500	Tb427-030023100:pseudogene
Tb427-030027100	Tb427-100148700	Tb427-070037000	Tb427-010007200	Tb427-090090600	Tb427-040026100
Tb427-100148300	Tb427-080079300:pseudogene	Tb427-080033400	Tb427-040028400	Tb427-100064300	Tb427-110074900
Tb427-070031300	Tb427-020010300	Tb427-070082500	Tb427-040054700	Tb427-050011100	Tb427-110063400
Tb427-090007800	Tb427-090067700	Tb427-110056400	Tb427-110062300	Tb427-090083900	Tb427-100088900
Tb427-100020700	Tb427-100062800	Tb427-110183800	Tb427-010032100	Tb427-000108500	Tb427-110013200
Tb427-080024400	Tb427-070044400	Tb427-020013200	Tb427-020023200	Tb427-100029600	Tb427-040031500
Tb427-090075800	Tb427-110144100	Tb427-110125700	Tb427-070053900	Tb427-050052400	Tb427-080084100
Tb427-020027600	Tb427-040015800	Tb427-090076800	Tb427-070060900	Tb427-110187000	Tb427-100157300
Tb427-000173900	Tb427-070018600	Tb427-100133700	Tb427-090072200	Tb427-100090000	Tb427-040026000
Tb427-030048400	Tb427-110156900	Tb427-110057200	Tb427-040027400	Tb427-090020100	Tb427-090055100
Tb427-100133700	Tb427-040033300	Tb427-090091300	Tb427-060035200	Tb427-030045300	Tb427-110130800
Tb427-010026600	Tb427-110030300	Tb427-020011000	Tb427-090038100	Tb427-080030700	Tb427-100040400
Tb427-050014500	Tb427-070060700	Tb427-070069300	Tb427-010022700	Tb427-110030900	Tb427-000653000:pseudogene
Tb427-040040100	Tb427-090052200	Tb427-110160300	Tb427-050031800	Tb427-110171400	Tb427-090034400
Tb427-060034800	Tb427-060029700	Tb427-080062800	Tb427-040026900	Tb427-030059600	Tb427-040026600
Tb427-070050200	Tb427-030030700	Tb427-110045900	Tb427-100129700	Tb427-110010100	Tb427-000497800
Tb427-090032700	Tb427-110154300	Tb427-040033800	Tb427-100107800	Tb427-110063400	Tb427-110127900
Tb427-070036900	Tb427-110010700	Tb427-100066300	Tb427-040053200	Tb427-010011000	Tb427-110085100
Tb427-100134300	Tb427-110040500	Tb427-080057200	Tb427-080087500	Tb427-070017900:pseudogene	Tb427-100016800
Tb427-010014600	Tb427-070053900	Tb427-110159300	Tb427-030041200	Tb427-100169400	Tb427-110023400
Tb427-110127500	Tb427-060055600	Tb427-020030600	Tb427-090030600	Tb427-050014000	Tb427-110099600
Tb427-110019500	Tb427-040018100	Tb427-110037300	Tb427-030018000	Tb427-090071900	Tb427-100108500
Tb427-080041700	Tb427-100154900	Tb427-070012200	Tb427-110015200	Tb427-090030400	Tb427-070027500
Tb427-110031200	Tb427-100099400	Tb427-050008400	Tb427-100169500	Tb427-100038300	Tb427-100138700
Tb427-010032500	Tb427-100118800	Tb427-110102200	Tb427-070006100	Tb427-090056600	Tb427-080031200
Tb427-110067700	Tb427-090026800	Tb427-100127600	Tb427-110170500	Tb427-100062700	Tb427-110046700
Tb427-100098400	Tb427-100150600	Tb427-000311500	Tb427-110007800	Tb427-050037900	Tb427-100127700
Tb427-090044900	Tb427-080006200	Tb427-040014600	Tb427-100059900	Tb427-100132400	Tb427-110059700
Tb427-070078800	Tb427-110160200	Tb427-040010800	Tb427-110123900	Tb427-010031500	Tb427-010028500
Tb427-110005700	Tb427-110016100	Tb427-110190200	Tb427-100059200	Tb427-110102500	Tb427-100024300
Tb427-100049300	Tb427-080053200	Tb427-110027700	Tb427-100168200	Tb427-060040100	Tb427-070049500
Tb427-110074700	Tb427-080072000	Tb427-040010900:pseudogene	Tb427-090068800	Tb427-070012300	Tb427-110005300
Tb427-030029400	Tb427-110188300	Tb427-090050500	Tb427-060042900	Tb427-110184500	Tb427-030021700
Tb427-010032700	Tb427-070038500	Tb427-100102700	Tb427-030030300	Tb427-060039000	Tb427-070007400
Tb427-100057000	Tb427-040014900	Tb427-100007400	Tb427-110016900	Tb427-090039600	Tb427-070058400
Tb427-000578400:pseudogene	Tb427-080085100	Tb427-110086600	Tb427-010016000	Tb427-110183100	Tb427-050048000
Tb427-100051100	Tb427-110129900	Tb427-070015200	Tb427-110122200	Tb427-100147100	Tb427-040029400
Tb427-100017300	Tb427-110153000	Tb427-030009300	Tb427-030012200	Tb427-030048700	Tb427-050031100
Tb427-070026700	Tb427-080007900	Tb427-030022200	Tb427-110136100	Tb427-010020000	Tb427-100042600
Tb427-040020400	Tb427-100029300	Tb427-030055000	Tb427-110084300	Tb427-070072300	Tb427-080062200
Tb427-090057100	Tb427-100136000	Tb427-080020800	Tb427-030013200	Tb427-100066100	Tb427-060031300
Tb427-100071500	Tb427-110062900	Tb427-040036700	Tb427-080068800	Tb427-010015200	Tb427-040051300:pseudogene
Tb427-110099500	Tb427-090077400	Tb427-030016100	Tb427-100100100	Tb427-000754700:pseudogene	Tb427-100009500
Tb427-020016200	Tb427-110035700	Tb427-030057400	Tb427-100026400	Tb427-080030400	Tb427-100163500
Tb427-080042200	Tb427-070076100	Tb427-000273200:pseudogene	Tb427-110130900	Tb427-110053000:pseudogene	Tb427-040008700
Tb427-050020600:pseudogene	Tb427-060011600	Tb427-040049100	Tb427-100065400	Tb427-110065100	Tb427-080058300
Tb427-030008200	Tb427-110067000	Tb427-090050200	Tb427-010012300	Tb427-090014100:pseudogene	Tb427-070071600
Tb427-060026000	Tb427-080011500	Tb427-090048800	Tb427-100109900	Tb427-000107300:pseudogene	Tb427-040038900
Tb427-110169000	Tb427-070070100	Tb427-110081400	Tb427-100085000	Tb427-100077200	Tb427-100154700
Tb427-100054500	Tb427-060035800	Tb427-110093400	Tb427-070028100	Tb427-080025200	Tb427-050046900
Tb427-070013900	Tb427-110106100	Tb427-110181000	Tb427-020021200	Tb427-040047100	Tb427-080062100
Tb427-100022700	Tb427-050033800	Tb427-110079900	Tb427-100113300	Tb427-040007400	Tb427-110166700
Tb427-100105400	Tb427-110127100	Tb427-100067700	Tb427-050043100	Tb427-080023100	Tb427-100068800
Tb427-030016000	Tb427-100126000	Tb427-050022100	Tb427-110129600	Tb427-090070300	Tb427-060048400
Tb427-020026600	Tb427-110061800	Tb427-100048100:pseudogene	Tb427-100128400	Tb427-110122000	Tb427-100106700
Tb427-080038300	Tb427-030044800	Tb427-100085000	Tb427-080020100	Tb427-110055400	Tb427-110166400
Tb427-100037800	Tb427-100143800	Tb427-100075800	Tb427-070055200:pseudogene	Tb427-110169700	Tb427-050014400
Tb427-100063000	Tb427-020032900	Tb427-070005300	Tb427-090064800	Tb427-020016500	Tb427-040021700
Tb427-070029700	Tb427-070071900	Tb427-100119600	Tb427-020013700	Tb427-040053200	Tb427-090067100
Tb427-040032100	Tb427-100110900	Tb427-110080000	Tb427-110149900	Tb427-070025700	Tb427-100130600
Tb427-070042100	Tb427-100095000	Tb427-080036400	Tb427-040024700	Tb427-110017500	Tb427-110184000
Tb427-090091400	Tb427-020012700	Tb427-080031800	Tb427-110169400	Tb427-040039000	Tb427-100069600
Tb427-060015900	Tb427-050046900	Tb427-080081300	Tb427-050013000	Tb427-040028800	Tb427-110119600
Tb427-030059000	Tb427-090048000	Tb427-110084800:pseudogene	Tb427-070050500	Tb427-000404400:pseudogene	Tb427-090080400
Tb427-110080000	Tb427-110073200	Tb427-110087900	Tb427-110073200	Tb427-080041400	Tb427-070080400
Tb427-100037900	Tb427-090013400	Tb427-090066000	Tb427-110036100	Tb427-090014700	Tb427-060050400
Tb427-080028100	Tb427-080048600	Tb427-030011400	Tb427-000497700	Tb427-050043200	Tb427-110024500
Tb427-080018000	Tb427-110173400	Tb427-110171500	Tb427-110159300	Tb427-080007200	Tb427-070029300:pseudogene
Tb427-060024500	Tb427-030055700	Tb427-080074800	Tb427-110092400	Tb427-100129800	Tb427-030047900
Tb427-060007000:pseudogene	Tb427-110186200	Tb427-110134600	Tb427-060039200	Tb427-110120100	Tb427-110053600
Tb427-110166400	Tb427-110166100	Tb427-080028200	Tb427-060040800	Tb427-060040400	Tb427-030037500
Tb427-090046000	Tb427-060041200	Tb427-110170200	Tb427-100030100	Tb427-110123000	Tb427-090074900
Tb427-110099700	Tb427-000017700	Tb427-110069900	Tb427-100160900	Tb427-110179800	Tb427-010013000
Tb427-080050900	Tb427-030014500	Tb427-040026700	Tb427-090038200	Tb427-100015900	Tb427-060033900
Tb427-110182500	Tb427-010012900	Tb427-000311600	Tb427-110063100	Tb427-070031300	Tb427-100049500
Tb427-040023700	Tb427-020016000	Tb427-100090400	Tb427-110032900	Tb427-070044400	Tb427-000276300
Tb427-040033600	Tb427-040046200	Tb427-110187600	Tb427-100164100	Tb427-080024400	Tb427-000285300
Tb427-060034400	Tb427-110038600	Tb427-070062900	Tb427-060051300	Tb427-020027600	Tb427-080026800
Tb427-110165400	Tb427-110134200	Tb427-040047300	Tb427-100037600	Tb427-070018600	Tb427-060043100
Tb427-040032900	Tb427-110068100	Tb427-110076100	Tb427-070020900	Tb427-040033300	Tb427-100131900
Tb427-110106900	Tb427-110073100	Tb427-090013200	Tb427-110065300	Tb427-100133700	Tb427-100140900
Tb427-000702600	Tb427-110031100	Tb427-070054500	Tb427-100145000	Tb427-010026600	Tb427-100130700
Tb427-090008700	Tb427-030009700	Tb427-100154800	Tb427-010009900	Tb427-110030300	Tb427-110176300
Tb427-090009000	Tb427-110146300	Tb427-100032400	Tb427-070013700	Tb427-070060700	Tb427-030058600
Tb427-030006500	Tb427-060043100	Tb427-110065800	Tb427-110095600	Tb427-040040100	Tb427-000015200:pseudogene
Tb427-110028600	Tb427-030041200	Tb427-110079800	Tb427-110023300	Tb427-090052200	Tb427-060024000
Tb427-070065100	Tb427-030021900	Tb427-060038600	Tb427-080046400	Tb427-030030700	Tb427-110161000
Tb427-110045900	Tb427-000107200	Tb427-110006400	Tb427-090053600	Tb427-070050200	Tb427-090071800
Tb427-100062900	Tb427-080058000	Tb427-110014400	Tb427-060017300	Tb427-040018100	Tb427-100122000
Tb427-100117900	Tb427-080072700	Tb427-070032200	Tb427-060037100	Tb427-100154900	Tb427-110090000
Tb427-010015300	Tb427-050051700	Tb427-100169900	Tb427-010022100	Tb427-010032500	Tb427-100008500
Tb427-110043700	Tb427-030016400	Tb427-040042600	Tb427-060011400:pseudogene	Tb427-080006200	Tb427-100158400
Tb427-110187500	Tb427-110081000	Tb427-100056200	Tb427-080072000	Tb427-090044900	Tb427-000245300:pseudogene
Tb427-100157800	Tb427-100057000	Tb427-080076100	Tb427-110188400	Tb427-080085100	Tb427-080038100
Tb427-050009400	Tb427-060023500	Tb427-100145700	Tb427-100090500	Tb427-070026700	Tb427-080088200
Tb427-050043900	Tb427-100076300	Tb427-010024300	Tb427-060016900	Tb427-090057100	Tb427-030038500
Tb427-060054600	Tb427-080018200	Tb427-100043300	Tb427-100097100	Tb427-100071500	Tb427-110088800
Tb427-040028700	Tb427-100096500	Tb427-080016700	Tb427-040050700	Tb427-020016200	Tb427-090015000
Tb427-080020500	Tb427-100130400	Tb427-110137700	Tb427-040011400	Tb427-110035700	Tb427-100012300
Tb427-030041200	Tb427-070041200	Tb427-040032100	Tb427-110093200	Tb427-030008200	Tb427-100098600
Tb427-110040400	Tb427-060053100	Tb427-080059200	Tb427-040028800	Tb427-110067000	Tb427-110101800
Tb427-080035200	Tb427-020012200	Tb427-100101200	Tb427-020020000	Tb427-060035800	Tb427-070039800
Tb427-000349200	Tb427-090036400	Tb427-050036900	Tb427-010020600	Tb427-070029700	Tb427-110120200
Tb427-100048600	Tb427-080054500	Tb427-080022600	Tb427-040014500	Tb427-100095000	Tb427-100126300
Tb427-050018400	Tb427-060053300	Tb427-090047900	Tb427-110153600	Tb427-020012700	Tb427-110159500
Tb427-110069800	Tb427-110088400	Tb427-110061700	Tb427-030010500	Tb427-080018000	Tb427-070005400
Tb427-030060000	Tb427-000578400:pseudogene	Tb427-090037200	Tb427-110065100	Tb427-110173400	Tb427-040007100
Tb427-100028800	Tb427-040009100	Tb427-110007600	Tb427-110096100	Tb427-030055700	Tb427-060040500
Tb427-100014400	Tb427-110149900	Tb427-070051800	Tb427-080058000	Tb427-110166400	Tb427-080078000
Tb427-100008400	Tb427-110050300	Tb427-080088700	Tb427-100107200	Tb427-060041200	Tb427-050021700
Tb427-070031800	Tb427-000501700:pseudogene	Tb427-030047600	Tb427-080028300	Tb427-080050900	Tb427-090040100
Tb427-110084400	Tb427-060021400	Tb427-000647800:pseudogene	Tb427-100167300	Tb427-110182500	Tb427-090081100
Tb427-060025500	Tb427-060039100	Tb427-110082900	Tb427-100059100	Tb427-060034400	Tb427-080042700
Tb427-070029800	Tb427-110126900	Tb427-020022800	Tb427-080078200	Tb427-110134200	Tb427-100041000
Tb427-000678500	Tb427-110038700	Tb427-100076000	Tb427-110019600:pseudogene	Tb427-110165400	Tb427-110106700
Tb427-110133200	Tb427-060018600	Tb427-080077400	Tb427-090027500	Tb427-090009000	Tb427-010028300
Tb427-090063500	Tb427-060047400	Tb427-040005100	Tb427-110144300	Tb427-060043100	Tb427-040037100
Tb427-110152800	Tb427-080013900	Tb427-110108900	Tb427-070037400	Tb427-030021900	Tb427-110166500
Tb427-110189000	Tb427-110058200	Tb427-110137200	Tb427-030053000	Tb427-070065100	Tb427-030050200
Tb427-080075500	Tb427-110070600	Tb427-070008200	Tb427-110057100	Tb427-110045900	Tb427-080027100
Tb427-110069900	Tb427-040005600	Tb427-100164300	Tb427-110141900	Tb427-100117900	Tb427-000516500:pseudogene
Tb427-110149500	Tb427-070005100:pseudogene	Tb427-100015100	Tb427-100068600:pseudogene	Tb427-050051700	Tb427-090051300
Tb427-110110300	Tb427-090081900	Tb427-100128900	Tb427-080076100	Tb427-110081000	Tb427-110028300
Tb427-030054800	Tb427-070019500	Tb427-090027400	Tb427-060018900	Tb427-100157800	Tb427-110024700
Tb427-100080800	Tb427-070057800	Tb427-040012400	Tb427-090057900	Tb427-050009400	Tb427-110020500
Tb427-100032400	Tb427-030006000	Tb427-110122200	Tb427-070010100	Tb427-060054600	Tb427-100076700
Tb427-040043800	Tb427-110162000	Tb427-100034000	Tb427-110051600	Tb427-080018200	Tb427-030011100
Tb427-040036400	Tb427-060031400	Tb427-100110900	Tb427-080042400	Tb427-080020500	Tb427-080037800
Tb427-100151100	Tb427-110054700	Tb427-040044500	Tb427-070041300	Tb427-020012200	Tb427-070055800
Tb427-110022400	Tb427-080021300	Tb427-110029400	Tb427-090075000	Tb427-060053300	Tb427-040016200
Tb427-100103700	Tb427-110008700	Tb427-090021100	Tb427-030044400	Tb427-110069800	Tb427-070078600
Tb427-110024500	Tb427-040010000	Tb427-000658500	Tb427-040008000	Tb427-040009100	Tb427-080016300:pseudogene
Tb427-030030400	Tb427-010022800	Tb427-110128400	Tb427-040023300	Tb427-060021400	Tb427-030022300
Tb427-080058000	Tb427-100104700	Tb427-070079300	Tb427-070009000	Tb427-060039100	Tb427-100051000
Tb427-070013700	Tb427-020017400	Tb427-080031000	Tb427-040040600	Tb427-090063500	Tb427-100127900
Tb427-040031700	Tb427-090053300	Tb427-000641800:pseudogene	Tb427-050044700	Tb427-110189000	Tb427-070022400
Tb427-070052700	Tb427-080049500	Tb427-100039400	Tb427-040036200	Tb427-080075500	Tb427-070079000
Tb427-020013500	Tb427-080015700	Tb427-040018800	Tb427-070064600	Tb427-070005100:pseudogene	Tb427-110091100
Tb427-110065200	Tb427-110044900	Tb427-090008000	Tb427-090025100	Tb427-110110300	Tb427-080084400
Tb427-090081100	Tb427-040049100	Tb427-100055700:pseudogene	Tb427-110067800	Tb427-030006000	Tb427-080083100
Tb427-090091300	Tb427-030057300	Tb427-090075100	Tb427-110064800	Tb427-110162000	Tb427-030056800
Tb427-080008600	Tb427-100016700	Tb427-080066700	Tb427-080068500	Tb427-040036400	Tb427-110141400
Tb427-050044500	Tb427-110158100	Tb427-030042000	Tb427-100015900	Tb427-110054700	Tb427-000578800
Tb427-100047600	Tb427-110028100	Tb427-100066600	Tb427-050016000	Tb427-100103700	Tb427-050035700
Tb427-080061800	Tb427-080051700	Tb427-110177100	Tb427-110098600	Tb427-020017400	Tb427-100012500
Tb427-060020000	Tb427-110052800	Tb427-100026100	Tb427-110056700	Tb427-110044900	Tb427-040016700
Tb427-110036000	Tb427-090075100	Tb427-110098100	Tb427-110162000	Tb427-110065200	Tb427-070039900
Tb427-110063700	Tb427-090018900	Tb427-110018900	Tb427-110010100	Tb427-090091300	Tb427-110138500
Tb427-000578700:pseudogene	Tb427-100058500	Tb427-100149900	Tb427-080063400	Tb427-110028100	Tb427-110154600
Tb427-080060400	Tb427-040030500:pseudogene	Tb427-060040700	Tb427-070066800	Tb427-060020000	Tb427-030060100
Tb427-110050700	Tb427-040019200	Tb427-010015500	Tb427-100025800	Tb427-110036000	Tb427-040050900
Tb427-110120300	Tb427-070024100	Tb427-030029700	Tb427-110010000	Tb427-100058500	Tb427-100009400
Tb427-070009400	Tb427-080062600	Tb427-110066100	Tb427-070009500	Tb427-040030500:pseudogene	Tb427-040009100
Tb427-100054300	Tb427-110172500	Tb427-030029200	Tb427-040028300	Tb427-070024100	Tb427-100089400
Tb427-110005900	Tb427-080041600	Tb427-100034800	Tb427-060055500	Tb427-080041600	Tb427-090046800
Tb427-110095800	Tb427-110170900	Tb427-040055600	Tb427-080008000	Tb427-110095800	Tb427-110032300
Tb427-070009300	Tb427-110177900	Tb427-050047500	Tb427-100095400	Tb427-070009300	Tb427-050038800
Tb427-050041200	Tb427-070055500	Tb427-040029500	Tb427-110102200	Tb427-020032200	Tb427-060047400
Tb427-100031200	Tb427-020025400	Tb427-110166200	Tb427-110052400	Tb427-090076800	Tb427-060015200
Tb427-050038100	Tb427-020015600	Tb427-060029900	Tb427-070019200	Tb427-040015900	Tb427-100089300
Tb427-050033000	Tb427-110156800	Tb427-010032100	Tb427-110070300	Tb427-070005600	Tb427-100129200
Tb427-100054800:pseudogene	Tb427-020032200	Tb427-090047600	Tb427-060041900	Tb427-100053200	Tb427-110182900
Tb427-060037200	Tb427-070068900	Tb427-100010300	Tb427-090037500	Tb427-090072500	Tb427-070025300
Tb427-080020100	Tb427-110107200	Tb427-010031400	Tb427-070078800	Tb427-070024900	Tb427-110100200
Tb427-090011700	Tb427-020010200	Tb427-000272200	Tb427-030059800	Tb427-100107200	Tb427-110130400
Tb427-100108200	Tb427-080073100	Tb427-100016500	Tb427-010031400	Tb427-070042700	Tb427-040026200
Tb427-100090500	Tb427-100035300	Tb427-080006200	Tb427-040029700	Tb427-020020700:pseudogene	Tb427-050011200
Tb427-060031400	Tb427-080067600	Tb427-080073600	Tb427-070012700	Tb427-100103500	Tb427-090007300
Tb427-020023600	Tb427-070039100	Tb427-100030600	Tb427-110126100	Tb427-040012400	Tb427-040028200
Tb427-010012900	Tb427-090076800	Tb427-110093600	Tb427-030028500	Tb427-050030000	Tb427-030011200
Tb427-060018600	Tb427-000277700:pseudogene	Tb427-070023800	Tb427-080058500	Tb427-110014800	Tb427-070046300
Tb427-100169100	Tb427-100097200	Tb427-020006300	Tb427-110083300	Tb427-090007700	Tb427-050006700
Tb427-080051700	Tb427-110082500	Tb427-110127400	Tb427-050033800	Tb427-100082200	Tb427-100018800
Tb427-070028800	Tb427-070017500	Tb427-060007600	Tb427-110176500	Tb427-000636500:pseudogene	Tb427-100169800
Tb427-040015900	Tb427-100090800	Tb427-110065200	Tb427-090091000	Tb427-110028300	Tb427-110148100
Tb427-070005600	Tb427-060016400	Tb427-080057100	Tb427-090007700	Tb427-000808900:pseudogene	Tb427-020026800
Tb427-100053200	Tb427-040042000	Tb427-040043700	Tb427-040031400	Tb427-110140700	Tb427-020023300
Tb427-070049900	Tb427-090072500	Tb427-110148000	Tb427-110156900	Tb427-110167200	Tb427-090014500
Tb427-100107200	Tb427-070024900	Tb427-060032000	Tb427-030054900	Tb427-090050900	Tb427-110186900
Tb427-110183400	Tb427-100144300	Tb427-100064400	Tb427-100150200	Tb427-070071500	Tb427-040028400
Tb427-070042700	Tb427-100101000	Tb427-110154800	Tb427-110066800	Tb427-030052800	Tb427-110062300
Tb427-020020700:pseudogene	Tb427-090012700	Tb427-100113300	Tb427-100028800	Tb427-080061500	Tb427-020023200
Tb427-110026900	Tb427-100103500	Tb427-020011200	Tb427-030015900	Tb427-100099900	Tb427-060035200
Tb427-040012400	Tb427-030013300	Tb427-030028600	Tb427-100128600	Tb427-090046700	Tb427-070069300
Tb427-100011800	Tb427-050030000	Tb427-110151700	Tb427-060016300	Tb427-100120600	Tb427-040026900
Tb427-050032700	Tb427-110014800	Tb427-110069800	Tb427-000311500	Tb427-090074900	Tb427-100066300
Tb427-030013700	Tb427-060033500	Tb427-110132100	Tb427-030040000	Tb427-000311500	Tb427-110037300
Tb427-070040900	Tb427-090007700	Tb427-020008500	Tb427-110093800	Tb427-060041900	Tb427-110015200
Tb427-090019000	Tb427-100082200	Tb427-030013300	Tb427-060043300	Tb427-000549200:pseudogene	Tb427-110170500
Tb427-090063100	Tb427-050035300	Tb427-080027300	Tb427-080084200	Tb427-110031900	Tb427-110123900
Tb427-090057200	Tb427-060054500	Tb427-090035800	Tb427-000695900:pseudogene	Tb427-040030600	Tb427-110027700
Tb427-100026400	Tb427-050031700	Tb427-040009900	Tb427-110100600	Tb427-110135600	Tb427-060042900
Tb427-020022000	Tb427-100111100:pseudogene	Tb427-020026100	Tb427-080061400	Tb427-110068400	Tb427-100102700
Tb427-110134300	Tb427-100097400	Tb427-030041500	Tb427-090021400	Tb427-080038600	Tb427-110016900
Tb427-050027200	Tb427-000636500:pseudogene	Tb427-090017500	Tb427-070062500	Tb427-080040000	Tb427-030022200
Tb427-050015100	Tb427-110028300	Tb427-100151900	Tb427-100170200	Tb427-010009300	Tb427-040036700
Tb427-110047600	Tb427-050033500	Tb427-100063800:pseudogene	MURF2	Tb427-040032200	Tb427-080068800
Tb427-100125200	Tb427-060036400	Tb427-030028700	Tb427-110124800	Tb427-040043600	Tb427-100065400
Tb427-040016100	Tb427-110167800	Tb427-040030800	Tb427-020025900:pseudogene	Tb427-040031000	Tb427-070028100
Tb427-040019800	Tb427-000808900:pseudogene	Tb427-110079500	Tb427-010006000	Tb427-080013100	Tb427-020021200
Tb427-100119300	Tb427-110140700	Tb427-100122300	Tb427-070056300	Tb427-100100700	Tb427-110079900
Tb427-040041500	Tb427-110167200	Tb427-100038100	Tb427-110100700	Tb427-070070000	Tb427-080020100
Tb427-090050900	Tb427-110185300	Tb427-100162400	Tb427-110147900	Tb427-040043000	Tb427-070055200:pseudogene
Tb427-100070200	Tb427-110085900	Tb427-010013300	Tb427-110143200	Tb427-110131700	Tb427-020013700
Tb427-090076300	Tb427-070018300	Tb427-000636500:pseudogene	Tb427-010009100	Tb427-080037900	Tb427-100119600
Tb427-070071500	Tb427-100170900	Tb427-060017100	Tb427-090079400	Tb427-090093200	Tb427-110073200
Tb427-030052800	Tb427-070034700	Tb427-090064100	Tb427-090038500	Tb427-070066600	Tb427-060040800
Tb427-100036700	Tb427-080061500	Tb427-040027600	Tb427-060034600	Tb427-110023400	Tb427-110170200
Tb427-030028500	Tb427-070066100	Tb427-000500100	Tb427-050045000	Tb427-110055700	Tb427-100160900
Tb427-010008100	Tb427-100099900	Tb427-030019200	Tb427-090052900	Tb427-110151000	Tb427-110032900
Tb427-080084400	Tb427-090046700	Tb427-100116600	Tb427-110048600	Tb427-110066400	Tb427-100164100
Tb427-070028400	Tb427-100120600	Tb427-070072900	Tb427-100052700	Tb427-050027300	Tb427-110187600
Tb427-090074900	Tb427-100163400	Tb427-090035300	Tb427-110186200	Tb427-080052100	Tb427-060051300
Tb427-000311500	Tb427-100083600	Tb427-030050000	Tb427-060050300	Tb427-110082200	Tb427-090013200
Tb427-110095400	Tb427-100059100	Tb427-040008000	Tb427-110052200	Tb427-110142400	Tb427-100145000
Tb427-020006800	Tb427-060041900	Tb427-090026500	Tb427-110177100	Tb427-000311000:pseudogene	Tb427-100032400
Tb427-040033800	Tb427-100139700	Tb427-070055400	Tb427-060030000	Tb427-100168300	Tb427-060017300
Tb427-110143500	Tb427-030018200	Tb427-050018400	Tb427-080046600	Tb427-100038900	Tb427-070032200
Tb427-090046100	Tb427-000549200:pseudogene	Tb427-100013700	Tb427-100080800	Tb427-100102000	Tb427-010024300
Tb427-030048000	Tb427-110031900	Tb427-100082000	Tb427-090030000	Tb427-100102900	Tb427-060016900
Tb427-110107500	Tb427-110168200	Tb427-100140600	Tb427-100168500	Tb427-070081200	Tb427-100097100
Tb427-040030600	Tb427-110162100	Tb427-060035300	Tb427-110164000	Tb427-080070600	Tb427-080016700
Tb427-110135600	Tb427-090056900	Tb427-110168400	Tb427-080025800	Tb427-090076900	Tb427-110093200
Tb427-060022900	Tb427-030047700	Tb427-100148700	Tb427-030048200	Tb427-030034300	Tb427-040028800
Tb427-030035000:pseudogene	Tb427-080043100	Tb427-040005000	Tb427-110153900	Tb427-010012800	Tb427-080059200
Tb427-060009100	Tb427-030022700	Tb427-090022700	Tb427-080028200	Tb427-100059000	Tb427-020020000
Tb427-100170500	Tb427-110068400	Tb427-100170200	Tb427-030008100	Tb427-020009200	Tb427-080022600
Tb427-090055000	Tb427-100121100	Tb427-050027900	Tb427-070031700	Tb427-090048600	Tb427-110153600
Tb427-110030500	Tb427-110142000	Tb427-070074900	Tb427-110082400	Tb427-110106500	Tb427-110007600
Tb427-040050200	Tb427-080038600	Tb427-030022800	Tb427-050030300	Tb427-080022000	Tb427-110096100
Tb427-080040000	Tb427-090054400	Tb427-100113600	Tb427-090054900	Tb427-020013800	Tb427-070051800
Tb427-010007400	Tb427-080073200	Tb427-070073500	Tb427-060054400	Tb427-030042000	Tb427-100107200
Tb427-070067900	Tb427-090009100	Tb427-070010300	Tb427-070070700	Tb427-050009300	Tb427-110082900
Tb427-010009300	Tb427-020006300	Tb427-040013200	Tb427-020032300	Tb427-050025800	Tb427-090027500
Tb427-040032200	Tb427-030035000:pseudogene	Tb427-110078300	Tb427-070065600	Tb427-010011600	Tb427-110108900
Tb427-060014900	Tb427-040043600	Tb427-020027600	Tb427-100163700	Tb427-100101100	Tb427-110137200
Tb427-080069200	Tb427-110155400	Tb427-040023900	Tb427-070052100	Tb427-080088200	Tb427-100164300
Tb427-010020200	Tb427-110070400	Tb427-100147300	Tb427-060055300	Tb427-080011700	Tb427-110141900
Tb427-080013100	Tb427-040031000	Tb427-050047700	Tb427-050016400	Tb427-030021800	Tb427-060018900
Tb427-020027800	Tb427-020011200	Tb427-080088100	Tb427-090058300	Tb427-020022500	Tb427-090057900
Tb427-090037400	Tb427-030060100	Tb427-110032000	Tb427-100076500	Tb427-040046800:pseudogene	Tb427-080042400
Tb427-100170900	Tb427-060019000	Tb427-030056200	Tb427-060037800	Tb427-020016400	Tb427-090075000
Tb427-100100700	Tb427-100102100	Tb427-060011700	Tb427-110044800	Tb427-080076200	Tb427-110029400
Tb427-110062900	Tb427-040011700	Tb427-070071700	Tb427-060038700	Tb427-040009400	Tb427-040023300
Tb427-100028700	Tb427-060037200	Tb427-030038400	Tb427-000107300:pseudogene	Tb427-020008400	Tb427-110128400
Tb427-070070000	Tb427-100168600	Tb427-040019600	Tb427-090008000	Tb427-110137700	Tb427-070079300
Tb427-110059400	Tb427-050013100	Tb427-100163400	Tb427-070071500	Tb427-090056800	Tb427-040040600
Tb427-040043000	Tb427-080078300	Tb427-040047100	Tb427-090072000	Tb427-100136500	Tb427-000641800:pseudogene
Tb427-040012200	Tb427-110131700	Tb427-040052100:pseudogene	Tb427-050016600	Tb427-090063200	Tb427-070064600
Tb427-070045500	Tb427-060039500	Tb427-030018600	Tb427-100006800	Tb427-000831900:pseudogene	Tb427-080068500
Tb427-080037900	Tb427-110177400	Tb427-090043600	Tb427-090016500	Tb427-090034400	Tb427-110098600
Tb427-030031600	Tb427-090011700	Tb427-050024700	Tb427-100029700	Tb427-110183500	Tb427-100026100
Tb427-100048400	Tb427-070009800	Tb427-100024000	Tb427-030032600	Tb427-040050600	Tb427-110010100
Tb427-090087100	Tb427-080038900	Tb427-000107900	Tb427-060035400	Tb427-080075400	Tb427-070009500
Tb427-100033800	Tb427-090093200	Tb427-050007300	Tb427-100093200	Tb427-010009400	Tb427-030029200
Tb427-090039500	Tb427-110165800	Tb427-110118900	Tb427-110041900	Tb427-060035200	Tb427-080008000
Tb427-100012100	Tb427-040031300	Tb427-100062800	Tb427-040044600	Tb427-090008200	Tb427-100010300
Tb427-070066600	Tb427-020015500	Tb427-100083800	Tb427-100014500	Tb427-000222800:pseudogene	Tb427-100030600
Tb427-110023400	Tb427-100029900	Tb427-090019000	Tb427-110104800	Tb427-050029700	Tb427-110093600
Tb427-010008000	Tb427-100132000	Tb427-040008400	Tb427-110044700	Tb427-050051800	Tb427-070023800
Tb427-080079900	Tb427-040042800	Tb427-110125500	Tb427-050046300	Tb427-050032400	Tb427-020006300
Tb427-000516000:pseudogene	Tb427-000311100	Tb427-070071800:pseudogene	Tb427-020022000	Tb427-100106100	Tb427-110148000
Tb427-110020200	Tb427-110055700	Tb427-040048100	Tb427-000017700	Tb427-110010300	Tb427-110156900
Tb427-100015700	Tb427-010029700	Tb427-080030000	Tb427-050018100	Tb427-110111500	Tb427-030054900
Tb427-020008200	Tb427-030038000	Tb427-110060500	Tb427-040020000	Tb427-060051400	Tb427-020011200
Tb427-110151000	Tb427-050017700	Tb427-040041100	Tb427-110125600	Tb427-000107000	Tb427-030028600
Tb427-030039200	Tb427-100158200	Tb427-080078900	Tb427-040023600	Tb427-000498400	Tb427-110151700
Tb427-000639900:pseudogene	Tb427-020019100	Tb427-110103000	Tb427-030030500	Tb427-100138900	Tb427-030040000
Tb427-110066400	Tb427-090052300	Tb427-090090200	Tb427-040041200	Tb427-030058200	Tb427-040009900
Tb427-080024000	Tb427-100142800	Tb427-000110300	Tb427-100101900	Tb427-080074800	Tb427-110100600
Tb427-110147500	Tb427-100035100	Tb427-040042700	Tb427-110183500	Tb427-000734000	Tb427-020026100
Tb427-050027300	Tb427-080052100	Tb427-070010100	Tb427-040052000	Tb427-030037500	Tb427-080061400
Tb427-110142400	Tb427-110082200	Tb427-110147500	Tb427-090088200	Tb427-110102800	Tb427-090017500
Tb427-100137300	Tb427-110167000	Tb427-050043200	Tb427-100167900	Tb427-080042700	Tb427-110079500
Tb427-010022000	Tb427-070013300	Tb427-050035200	Tb427-040044000	Tb427-050023800	Tb427-110147900
Tb427-000311000:pseudogene	Tb427-030021200	Tb427-090020900	Tb427-100086600	Tb427-100164100	Tb427-110143200
Tb427-050036900	Tb427-090015500	Tb427-080088600	Tb427-110136400	Tb427-000305100	Tb427-090038500
Tb427-100168300	Tb427-100092500	Tb427-090028000	Tb427-100021900	Tb427-040020100	Tb427-090064100
Tb427-050026900	Tb427-110056400	Tb427-000274500:pseudogene	Tb427-030031200	Tb427-070050500	Tb427-070072900
Tb427-070006400	Tb427-110122600	Tb427-110017300	Tb427-000311200	Tb427-070022400	Tb427-040005000
Tb427-110072500	Tb427-030059500	Tb427-070018500	Tb427-030044600	Tb427-110160700	Tb427-030022800
Tb427-030023000	Tb427-110040400	Tb427-000311200	Tb427-000654900:pseudogene	Tb427-040006500	Tb427-070070700
Tb427-090066700	Tb427-100038900	Tb427-030010300	Tb427-110172100	Tb427-070060100	Tb427-110078300
Tb427-050042800	Tb427-100032400	Tb427-100123300	Tb427-080079200	Tb427-100050400	Tb427-060055300
Tb427-020010600	Tb427-100102000	Tb427-050053600:pseudogene	Tb427-050047300	Tb427-090071300	Tb427-050016400
Tb427-100102900	Tb427-100162300	Tb427-100123500	Tb427-080089000:pseudogene	Tb427-070053700	Tb427-100076500
Tb427-070081200	Tb427-080049700	Tb427-040005600	Tb427-080085200	Tb427-080078500	Tb427-030056200
Tb427-080013300	Tb427-060037900	Tb427-000754700:pseudogene	Tb427-010014200	Tb427-000484600	Tb427-000107300:pseudogene
Tb427-080020200	Tb427-090083600	Tb427-030041900	Tb427-080013800	Tb427-090082400	Tb427-090016500
Tb427-080070600	Tb427-080069700	Tb427-100107500	Tb427-090019900	Tb427-110075300	Tb427-050024700
Tb427-010024800	Tb427-070013800	Tb427-100084300	Tb427-040014000:pseudogene	Tb427-070019000	Tb427-100029700
Tb427-090076900	Tb427-010032100	Tb427-070031900	Tb427-110187500	Tb427-010029000	Tb427-100062800
Tb427-080024600	Tb427-090069400	Tb427-060054200	Tb427-080032800	Tb427-030041700	Tb427-100083800
Tb427-030034300	Tb427-040036100	Tb427-040031400	Tb427-060017100	Tb427-070013500	Tb427-050046300
Tb427-010012800	Tb427-110046400:pseudogene	Tb427-070006100	Tb427-100007000	Tb427-080085400	Tb427-040020000
Tb427-070062200	Tb427-040049200	Tb427-010020200	Tb427-110168400	Tb427-080075600	Tb427-040041100
Tb427-110130900	Tb427-030030500	Tb427-050033500	Tb427-110035900	Tb427-110098300	Tb427-080078900
Tb427-100059000	Tb427-050037000	Tb427-100097200	Tb427-020032200	Tb427-110111400	Tb427-110103000
Tb427-090068200	Tb427-070025500	Tb427-110111100	Tb427-060036300	Tb427-100122200	Tb427-100101900
Tb427-020009200	Tb427-070080000	Tb427-060044000	Tb427-030049800	Tb427-070059500	Tb427-050035200
Tb427-100068900	Tb427-110074700	Tb427-010007700	Tb427-110055800	Tb427-070076800	Tb427-030031200
Tb427-060035700	Tb427-090016300	Tb427-110138000	Tb427-090013500	Tb427-070082600	Tb427-070018500
Tb427-110106700	Tb427-100025400	Tb427-110064000	Tb427-110139400	Tb427-110058400	Tb427-080079200
Tb427-000173800	Tb427-110142300	Tb427-090065700	Tb427-110037000	Tb427-080037300	Tb427-040005600
Tb427-030009300	Tb427-090019900	Tb427-020009100	Tb427-010024800	Tb427-030055100	Tb427-090019900
Tb427-110106500	Tb427-090048600	Tb427-070082000	Tb427-110007000	Tb427-110127900	Tb427-020032200
Tb427-080072300	Tb427-100101900	Tb427-020030100	Tb427-020008200	Tb427-100066200	Tb427-100097200
Tb427-090025400	Tb427-070060300	Tb427-080005400:pseudogene	Tb427-100032900	Tb427-100102200	Tb427-110111100
Tb427-100023700:pseudogene	Tb427-080022000	Tb427-090051400	Tb427-010014700	Tb427-020023300	Tb427-110055800
Tb427-020013800	Tb427-050034000	Tb427-000759300	Tb427-060031400	Tb427-060032200:pseudogene	Tb427-020009100
Tb427-030042000	Tb427-080013300	Tb427-100010100	Tb427-080059300	Tb427-050045700	Tb427-020008200
Tb427-050009300	Tb427-050027800	Tb427-090084900	Tb427-110069900	Tb427-110143600	Tb427-020030100
Tb427-050025800	Tb427-000775100	Tb427-080069600	Tb427-090013600	Tb427-100143700	Tb427-090051400
Tb427-070013800	Tb427-060033800	Tb427-050036300	Tb427-110056800	Tb427-100153200	Tb427-060031400
Tb427-080038900	Tb427-010011600	Tb427-050052100	Tb427-080063600	Tb427-070005200:pseudogene	Tb427-100010100
Tb427-100129200	Tb427-100101100	Tb427-050034900	Tb427-110125800	Tb427-000635100	Tb427-080069600
Tb427-030039800	Tb427-090040500	Tb427-100037600	Tb427-100120600	Tb427-000696100:pseudogene	Tb427-080063600
Tb427-100088500	Tb427-110054400	Tb427-030020000	Tb427-070063100	Tb427-070036400	Tb427-040051600
Tb427-000516300:pseudogene	Tb427-040051600	Tb427-020015600	Tb427-100072200	Tb427-110186900	Tb427-110131700
Tb427-080009600	Tb427-110019500	Tb427-100101000	Tb427-000008100:pseudogene	Tb427-080064300	Tb427-090069800
Tb427-080088200	Tb427-050052200	Tb427-090065800	Tb427-000746600:pseudogene	Tb427-100145700	Tb427-110129700
Tb427-030054200	Tb427-110119700	Tb427-050032800	Tb427-040051600	Tb427-110101800	Tb427-090056800
Tb427-020005400	Tb427-070068800	Tb427-110172500	Tb427-090080700	Tb427-100118400	Tb427-040020600
Tb427-080011700	Tb427-110140000	Tb427-110157300	Tb427-110089800	Tb427-000708300:pseudogene	Tb427-060017500
Tb427-100011600	Tb427-050015100	Tb427-110033200	Tb427-110131700	Tb427-090044700	Tb427-110080300
Tb427-060035900	Tb427-110072700	Tb427-110129700	Tb427-090069800	Tb427-100030100	Tb427-110029300
Tb427-070058700	Tb427-100007600	Tb427-050011700	Tb427-090056800	Tb427-090079600	Tb427-100134100
Tb427-030021800	Tb427-070014500	Tb427-100036600	Tb427-030023900	Tb427-010023100	Tb427-000749100:pseudogene
Tb427-110057200	Tb427-020022500	Tb427-030030000	Tb427-040020600	Tb427-110181100	Tb427-090052300
Tb427-080056900	Tb427-040046800:pseudogene	Tb427-110164400	Tb427-030008500	Tb427-110175700:pseudogene	Tb427-040043900
Tb427-020016400	Tb427-090013000	Tb427-040036200	Tb427-060017500	Tb427-100035700	Tb427-000834900
Tb427-080076200	Tb427-110158200	Tb427-110080300	Tb427-060039000	Tb427-090092800:pseudogene	Tb427-080047300
Tb427-070055100	Tb427-060037700	Tb427-040054800	Tb427-030027000	Tb427-100072900	Tb427-020017200
Tb427-050032800	Tb427-050007200	Tb427-050027600	Tb427-050032700	Tb427-080029200	Tb427-000273900
Tb427-110126200	Tb427-090041100	Tb427-110030700	Tb427-030005500	Tb427-020032500	Tb427-080081700
Tb427-110085900	Tb427-040009700	Tb427-110029300	Tb427-110126700	Tb427-070072600	Tb427-000277900
Tb427-090040500	Tb427-070052300:pseudogene	Tb427-010027500	Tb427-110152000	Tb427-080056700	Tb427-080041200
Tb427-110058200	Tb427-050015500	Tb427-040055700	Tb427-100013000	Tb427-060029900	Tb427-080069400
Tb427-080027500	Tb427-040027500	Tb427-030060000	Tb427-100134100	Tb427-050039400	Tb427-110016000
Tb427-050045500	Tb427-020028700	Tb427-100020600	Tb427-010031900	Tb427-100135800	Tb427-090069600
Tb427-040019400	Tb427-090021400	Tb427-080086500	Tb427-100129400	Tb427-010013700	Tb427-080058600
Tb427-110109000	Tb427-100068700	Tb427-110092400	Tb427-020028700	Tb427-020005700	Tb427-090052500
Tb427-030052100	Tb427-110005900	Tb427-080034300	Tb427-100093600	Tb427-110166900	Tb427-100011800
Tb427-060005800:pseudogene	Tb427-070023800	Tb427-030008200	Tb427-080081500	Tb427-090044600:pseudogene	Tb427-070049700
Tb427-040043900	Tb427-030047600	Tb427-110176500	Tb427-000799700:pseudogene	Tb427-100161500	Tb427-070064400
Tb427-100162600	Tb427-060033300	Tb427-000274800:pseudogene	Tb427-000749100:pseudogene	Tb427-110052400	Tb427-090091400
Tb427-040009400	Tb427-080034400	Tb427-100137800	Tb427-100087700	Tb427-110170500	Tb427-110121400
Tb427-090087600	Tb427-030020000	Tb427-090052300	Tb427-110160500	Tb427-100058300	Tb427-110168500
Tb427-100069100	Tb427-100077300	Tb427-100114200	Tb427-040043900	Tb427-090065700	Tb427-100099500
Tb427-080006600	Tb427-090053000	Tb427-070082400	Tb427-050028500	Tb427-070039800	Tb427-050021500
Tb427-020008400	Tb427-110137700	Tb427-100170100	Tb427-100067700	Tb427-030021000	Tb427-100161500
Tb427-090056800	Tb427-050037100	Tb427-050036500	Tb427-080021600	Tb427-100042000	Tb427-040015500
Tb427-040028000	Tb427-110159300	Tb427-030012300	Tb427-000834900	Tb427-090040900	Tb427-110147000
Tb427-100136500	Tb427-100044300	Tb427-050028200	Tb427-080047300	Tb427-100137400	Tb427-000801400
Tb427-040055800	Tb427-100132700:pseudogene	Tb427-090030100	Tb427-000801300:pseudogene	Tb427-080041000	Tb427-030051400
Tb427-090063200	Tb427-100135500	Tb427-030032700:pseudogene	Tb427-080038200	Tb427-070027900	Tb427-060039600
Tb427-000831900:pseudogene	Tb427-100129900	Tb427-020017200	Tb427-070040100	Tb427-110102900	Tb427-100127200
Tb427-080028200	Tb427-090011800	Tb427-080073300	Tb427-000273900	Tb427-090039300	Tb427-040027500
Tb427-030039900	Tb427-100054800:pseudogene	Tb427-080081700	Tb427-000733000:pseudogene	Tb427-050006300	Tb427-110170700
Tb427-090044200	Tb427-090034400	Tb427-000277900	Tb427-090012200	Tb427-090087400	Tb427-030054700
Tb427-010008400	Tb427-110183500	Tb427-000015600:pseudogene	Tb427-080041200	Tb427-080057200	Tb427-080069100
Tb427-090047000	Tb427-050013800	Tb427-080069400	Tb427-110140000	Tb427-100142400	Tb427-050053500
Tb427-040050600	Tb427-030027000	Tb427-070043700	Tb427-060034200	Tb427-110078300	Tb427-040007000
Tb427-080025100	Tb427-110085500	Tb427-100046200:pseudogene	Tb427-110016000	Tb427-100143900	Tb427-040040000
Tb427-010030000	Tb427-100034000	Tb427-030033200	Tb427-090069600	Tb427-020009000	Tb427-080073200
Tb427-070018200	Tb427-020030700	Tb427-000804500:pseudogene	Tb427-080039600	Tb427-100150500	Tb427-100137700:pseudogene
Tb427-100036000	Tb427-100152600	Tb427-050040200	Tb427-110032400	Tb427-080010200:pseudogene	Tb427-110164300
Tb427-090087200	Tb427-110161100	Tb427-110020700	Tb427-080058600	Tb427-110109800	Tb427-110084600:pseudogene
Tb427-060055600	Tb427-100021000	Tb427-080057500	Tb427-090028000	Tb427-100090600	Tb427-100095500
Tb427-010008900	Tb427-090009300	Tb427-090052500	Tb427-100011800	Tb427-110034800	Tb427-070029800
Tb427-100083700	Tb427-080075400	Tb427-060052800	Tb427-070049700	Tb427-110026700	Tb427-010028700
Tb427-070035400	Tb427-010009400	Tb427-090091400	Tb427-070064400	Tb427-110083300	Tb427-080011000
Tb427-070053600	Tb427-090006400	MURF2	Tb427-100051900	Tb427-100089300	Tb427-090086600
Tb427-100065600	Tb427-040033600	Tb427-110168500	Tb427-110121400	Tb427-040038400	Tb427-100052800
Tb427-060035200	Tb427-100134300	Tb427-080070900	Tb427-060034700	Tb427-080024100	Tb427-070052300:pseudogene
Tb427-100087900	Tb427-100083700	Tb427-030014700	Tb427-100099500	Tb427-110179400	Tb427-100012900
Tb427-030048100	Tb427-010028100	Tb427-100081400	Tb427-050021500	Tb427-070048600	Tb427-110068400
Tb427-060036800	Tb427-100113300	Tb427-090092900	Tb427-100162600	Tb427-000014600:pseudogene	Tb427-100076300
Tb427-090037600	Tb427-090008200	Tb427-090022600	Tb427-050031500	Tb427-050012100	Tb427-020012400
Tb427-110047300	Tb427-020031200	Tb427-070029100	Tb427-000656100:pseudogene	Tb427-050011400	Tb427-020019700
Tb427-000222800:pseudogene	Tb427-090014400	Tb427-000799700:pseudogene	Tb427-000107900	Tb427-060036700	Tb427-070064300
Tb427-050051800	Tb427-050029700	Tb427-050037300	Tb427-060008200	Tb427-110187700	Tb427-040047700
Tb427-050032400	Tb427-110105300	Tb427-110043300	Tb427-100161500	Tb427-010028000	Tb427-030038300
Tb427-050043800	Tb427-070054300	Tb427-110141500	Tb427-090014700	Tb427-020031300	Tb427-030048600
Tb427-040031200	Tb427-100137700:pseudogene	Tb427-100131400	Tb427-040015500	Tb427-110037000	Tb427-090012400
Tb427-100106100	Tb427-110008800	Tb427-080041100	Tb427-070054100	Tb427-000578800	Tb427-090086500:pseudogene
Tb427-110082400	Tb427-020008200	Tb427-110147000	Tb427-030055800	Tb427-110005000	Tb427-030028000
Tb427-090066000	Tb427-080068000	Tb427-030051400	Tb427-000801400	Tb427-000445400	Tb427-110128100
Tb427-080070800	Tb427-020021600	Tb427-060043900	Tb427-060039600	Tb427-080031000	Tb427-080022500
Tb427-110111500	Tb427-110010300	Tb427-090050300	Tb427-100127200	Tb427-050035200	Tb427-100147100
Tb427-070047500	Tb427-060051400	Tb427-110173800	Tb427-100081600	Tb427-070062900	Tb427-070070000
Tb427-110105100	Tb427-100131200	Tb427-070061500	Tb427-110107800	Tb427-090091500	Tb427-110046200
Tb427-030047900	Tb427-050025000	Tb427-040041200	Tb427-040027500	Tb427-100137900	Tb427-090069100
Tb427-070050800	Tb427-070009000	Tb427-110181100	Tb427-110061800	Tb427-040019300	Tb427-010007400
Tb427-050016300	Tb427-110185600	Tb427-110170700	Tb427-090062700	Tb427-100106900	Tb427-030058200
Tb427-100151000	Tb427-000107000	Tb427-110130200	Tb427-100019500	Tb427-090038500	Tb427-070063400
Tb427-090070100	Tb427-000498400	Tb427-080075400	Tb427-110024900	Tb427-050012400	Tb427-020018200
Tb427-100138900	Tb427-070006900	Tb427-100148000	Tb427-030054700	Tb427-100030400	Tb427-040028700
Tb427-030058200	Tb427-030028200	Tb427-090037400	Tb427-000748900	Tb427-100037600	Tb427-070059500
Tb427-070019500	Tb427-080074800	Tb427-100170900	Tb427-050015100	Tb427-060038900	Tb427-030018700
Tb427-040008900	Tb427-000734000	Tb427-110043800	Tb427-110093400	Tb427-100157300	Tb427-070055000
Tb427-010021500	Tb427-030037500	Tb427-080069100	Tb427-040033800	Tb427-000358400	Tb427-100138100
Tb427-100131100	Tb427-000814000:pseudogene	Tb427-080085400	Tb427-040036500	Tb427-090023200	Tb427-030017500
Tb427-090062000	Tb427-110110900	Tb427-050007700	Tb427-050053500	Tb427-110190200	Tb427-080029200
Tb427-110170900	Tb427-110062700	Tb427-080063400	Tb427-030006200	Tb427-030042800	Tb427-080007700
Tb427-090087300	Tb427-080028000	Tb427-100030400	Tb427-070009900	Tb427-080047800	Tb427-080070600
Tb427-020016600	Tb427-010012100	Tb427-050030600	Tb427-110123600	Tb427-050031400	Tb427-110050600
Tb427-060037900	Tb427-110102800	Tb427-090079600	Tb427-110174600	Tb427-070054100	Tb427-100020900
Tb427-060015200	Tb427-040022300	Tb427-040007400	Tb427-050010300	Tb427-070077100	Tb427-070075000
Tb427-050018800	Tb427-080042700	Tb427-010011900	Tb427-040007000	Tb427-020010100	Tb427-100122600
Tb427-000347900	Tb427-050023800	Tb427-040040000	Tb427-080073200	Tb427-100138200	Tb427-070068200
Tb427-090089300	Tb427-090082200	Tb427-100127100	Tb427-100137700:pseudogene	Tb427-030012400	Tb427-040021200
Tb427-100164100	Tb427-100037900	Tb427-020005700	Tb427-100071700	Tb427-060030400	Tb427-060043500
Tb427-030038900	Tb427-110140900	Tb427-110019600:pseudogene	Tb427-110164300	Tb427-000022300:pseudogene	Tb427-030046000
Tb427-070081300	Tb427-080028200	Tb427-100063100	Tb427-070043700	Tb427-100046600	Tb427-100059800
Tb427-000305100	Tb427-040020100	Tb427-000481600:pseudogene	Tb427-000579100	Tb427-100024200	Tb427-080007100
Tb427-070050500	Tb427-000638000:pseudogene	Tb427-110146500	Tb427-110090100	Tb427-100140600	Tb427-060038900
Tb427-000304600:pseudogene	Tb427-080044700	Tb427-110096000	Tb427-110084600:pseudogene	Tb427-060039600	Tb427-110016200
Tb427-110019900	Tb427-000245600:pseudogene	Tb427-070052200	Tb427-100095500	Tb427-090072600	Tb427-000366800:pseudogene
Tb427-070022400	Tb427-110160700	Tb427-070029800	Tb427-030020000	Tb427-080080600	Tb427-090069000
Tb427-100158300	Tb427-050045500	Tb427-070006600	Tb427-010028700	Tb427-070082900:pseudogene	Tb427-110074000
Tb427-080027300	Tb427-040046100	Tb427-080028300	Tb427-040054800	Tb427-110090900	Tb427-100110700
Tb427-100041100	Tb427-080041500	Tb427-100091700	Tb427-040028100	Tb427-070008800	Tb427-110053200
Tb427-100020400	Tb427-040006500	Tb427-050020300	Tb427-080080100	Tb427-100115900	Tb427-090046400
Tb427-010008700	Tb427-060034200	Tb427-100104000	Tb427-080011000	Tb427-030049800	Tb427-050052900
Tb427-070007800	Tb427-070060100	Tb427-080064400	Tb427-110165600	Tb427-110080100	Tb427-050017300
Tb427-020017200	Tb427-100050400	Tb427-040031900	Tb427-060050200	Tb427-110045000	Tb427-040006900
Tb427-050028200	Tb427-060034300	Tb427-110061300	Tb427-100086500	Tb427-000703500:pseudogene	Tb427-040041500
Tb427-030058300	Tb427-110171200	Tb427-000277400	Tb427-090086600	Tb427-090056200	Tb427-100135400
Tb427-090071300	Tb427-030041900	Tb427-060043600	Tb427-100052800	Tb427-010010300	Tb427-100078100
Tb427-100083800	Tb427-070053700	Tb427-070052300:pseudogene	Tb427-110086400	Tb427-100112900	Tb427-050032300
Tb427-100101000	Tb427-080078500	Tb427-020024500	Tb427-060032100	Tb427-110185200	Tb427-050037000
Tb427-000484600	Tb427-040027300	Tb427-070050900	Tb427-100012900	Tb427-050047800	Tb427-110138700
Tb427-090082400	Tb427-010011100	Tb427-090086400:pseudogene	Tb427-110008200	Tb427-060040300	Tb427-100042400
Tb427-110020500	Tb427-080085900	Tb427-040027400	Tb427-080088600	Tb427-020021700	Tb427-110150400
Tb427-110155600	Tb427-100110200	Tb427-070018200	Tb427-080086500	Tb427-100085800	Tb427-000271200:pseudogene
Tb427-010008800	Tb427-000274700:pseudogene	Tb427-110068400	Tb427-100139400	Tb427-110040300	Tb427-000349200
Tb427-000637600	Tb427-070067900	Tb427-020008700	Tb427-080037600	Tb427-110086400	Tb427-090044500:pseudogene
Tb427-100016600:pseudogene	Tb427-010012600	Tb427-040036500	Tb427-110080500	Tb427-110020100	Tb427-000516000:pseudogene
Tb427-080007800	Tb427-100075600:pseudogene	Tb427-080035000	Tb427-110014300	Tb427-110172100	Tb427-110111500
Tb427-080038800	Tb427-110132100	Tb427-070038500	Tb427-100076300	Tb427-000270200:pseudogene	Tb427-000708300:pseudogene
Tb427-110075300	Tb427-070010000	Tb427-020012400	Tb427-090063800	Tb427-000721000	Tb427-080070700
Tb427-090045100	Tb427-110046100	Tb427-020019700	Tb427-080070800	Tb427-100009400	Tb427-080055400
Tb427-110128000	Tb427-110107700	Tb427-110097000	Tb427-070064300	Tb427-060036300	Tb427-090012900
Tb427-110138400	Tb427-070029800	Tb427-100092300	Tb427-040047700	Tb427-110139800	Tb427-100039200
Tb427-110050400	Tb427-010028200	Tb427-110076900	Tb427-030056300	Tb427-040016500	Tb427-090018900
Tb427-070010800	Tb427-080027100	Tb427-070071900	Tb427-040042600	Tb427-030037400	Tb427-090048000
Tb427-070019000	Tb427-100033800	Tb427-080011400	Tb427-070005300	Tb427-100065300	Tb427-100088000
Tb427-110038100	Tb427-090011900	Tb427-070014700	Tb427-080056600	Tb427-110172700	Tb427-070020000
Tb427-040013800	Tb427-080060900	Tb427-110165100	Tb427-100057200	Tb427-100126500	Tb427-040032000
Tb427-010029000	Tb427-110142900	Tb427-100089100	Tb427-050045500	Tb427-070062800	Tb427-110079400
Tb427-000311800	Tb427-030041700	Tb427-010009100	Tb427-030047400	Tb427-100010200	Tb427-090067800
Tb427-100168600	Tb427-100006200	Tb427-010013500	Tb427-040027200	Tb427-050019800	Tb427-000737400
Tb427-090082200	Tb427-110080600	Tb427-030035000:pseudogene	Tb427-030038300	Tb427-100051300	Tb427-040051800
Tb427-110159300	Tb427-070013500	Tb427-090051600	Tb427-050037200	Tb427-100009100	Tb427-100040200
Tb427-110045400	Tb427-080066100	Tb427-040011600	Tb427-030048600	Tb427-070085000:pseudogene	Tb427-000222800:pseudogene
Tb427-110188300	Tb427-020009900	Tb427-060040400	Tb427-090012400	Tb427-000498000	Tb427-070005600
Tb427-040046300	Tb427-110104000	Tb427-090086500:pseudogene	Tb427-040042000	Tb427-080063700	Tb427-000349300
Tb427-100026000	Tb427-090039700	Tb427-060033200	Tb427-000277700:pseudogene	Tb427-000803500:pseudogene	Tb427-100104300
Tb427-100117100	Tb427-080085400	Tb427-100090500	Tb427-080024400	Tb427-110047400	Tb427-020026900
Tb427-040022400	Tb427-080075600	Tb427-080074500	Tb427-110184500	Tb427-050045400	Tb427-000783200:pseudogene
Tb427-040039300	Tb427-070007800	Tb427-030055800	Tb427-030030100	Tb427-080032400	Tb427-110008400
Tb427-110111400	Tb427-110098300	Tb427-110128100	Tb427-030028000	Tb427-100116800	Tb427-000766300:pseudogene
Tb427-100122200	Tb427-090069800	Tb427-080022500	Tb427-080024200	Tb427-020015300	Tb427-020025300
Tb427-020030100	Tb427-070059500	Tb427-070083100	Tb427-050047700	Tb427-050016400	Tb427-030026800
Tb427-100125700	Tb427-070076800	Tb427-100147100	Tb427-090063000	Tb427-100065400	Tb427-040057000
Tb427-090061700	Tb427-110071900	Tb427-110074700	Tb427-110125000	Tb427-110027400	Tb427-000173900
Tb427-100117400	Tb427-070016000	Tb427-050029900	Tb427-070058200	Tb427-030023100:pseudogene	Tb427-070063200
Tb427-080073700	Tb427-070069400	Tb427-070013700	Tb427-110057500		Tb427-100158300
Tb427-090080000	Tb427-010029900	Tb427-070070000	Tb427-100031000		Tb427-080059600
Tb427-030014500	Tb427-050041200	Tb427-070013400	Tb427-110034000		Tb427-080023100
Tb427-100145900	Tb427-060054300	Tb427-090072000	Tb427-110046200		Tb427-000806000:pseudogene
Tb427-070082600	Tb427-070021300	Tb427-080006700	Tb427-100119800		Tb427-010023100
Tb427-040028200	Tb427-110058400	Tb427-080052800	Tb427-090069100		Tb427-000445700:pseudogene
Tb427-080037300	Tb427-050017900	Tb427-050033000	Tb427-010007400		Tb427-100158600
Tb427-040021900	Tb427-070049700	Tb427-070025400	Tb427-110120300		Tb427-070009700
Tb427-110148600	Tb427-090069500	Tb427-070008100	Tb427-100020100		Tb427-110075400
Tb427-000799500:pseudogene	Tb427-110096500	Tb427-110152400	Tb427-030058200		Tb427-110140800
Tb427-010012000	Tb427-080026200	Tb427-040011400	Tb427-090040800		Tb427-090039400
Tb427-110127900	Tb427-030055100	Tb427-100011200	Tb427-060030800		Tb427-100016900
Tb427-010015600	Tb427-050018400	Tb427-050035500	Tb427-090062300		Tb427-100170400
Tb427-100066200	Tb427-080006300	Tb427-110170600	Tb427-070063400		Tb427-050038100
Tb427-050028100	Tb427-000015100	Tb427-020028500	Tb427-020018200		Tb427-020006800
Tb427-100170000	Tb427-100102200	Tb427-110157900	Tb427-010007900		Tb427-080087600
Tb427-020023300	Tb427-060032200:pseudogene	Tb427-110162800	Tb427-020021600		Tb427-000745700
Tb427-010015000	Tb427-050045700	Tb427-090050400	Tb427-030060000		Tb427-030022500
Tb427-100123700	Tb427-080086100	Tb427-050042000	Tb427-050033100		Tb427-070061900
Tb427-030039100	Tb427-110076800	Tb427-110048000	Tb427-110043800		Tb427-110091200
Tb427-110143600	Tb427-080069500	Tb427-040015400	Tb427-070066700		Tb427-070020300
Tb427-090047500	Tb427-100065900	Tb427-040028700	Tb427-010018600		Tb427-020018000
Tb427-100036200	Tb427-010015400	Tb427-100015200	Tb427-110022300		Tb427-100049400
Tb427-100143700	Tb427-080012300	Tb427-060034800	Tb427-090057000		Tb427-110150900
Tb427-070050900	Tb427-100153200	Tb427-080030500	Tb427-110175100		Tb427-110012500
Tb427-080046100	Tb427-040006800	Tb427-070059500	Tb427-080006700		Tb427-110046300
Tb427-080044200	Tb427-070005200:pseudogene	Tb427-110057100	Tb427-110060500		Tb427-100106600
Tb427-110016700	Tb427-100026200	Tb427-060050200	Tb427-080011400		Tb427-070020500
Tb427-000635100	Tb427-000696100:pseudogene	Tb427-000783900	Tb427-030018700		Tb427-080032300
Tb427-070036400	Tb427-000483900:pseudogene	Tb427-070055000	Tb427-050015400		Tb427-040031600
Tb427-110033800	Tb427-060021300	Tb427-110063100	Tb427-110175800		Tb427-070022300
Tb427-090078500	Tb427-100067500	Tb427-100138100	Tb427-000481600:pseudogene		Tb427-100140200
Tb427-070036500	Tb427-110111100	Tb427-080026600	Tb427-030017500		Tb427-100158000
Tb427-110182600	Tb427-110186900	Tb427-110093800	Tb427-080029200		Tb427-100032500
Tb427-010021900	Tb427-100154500	Tb427-110160200	Tb427-050041800		Tb427-090027800
Tb427-110120600	Tb427-080017200	Tb427-110154300	Tb427-080007700		Tb427-080068300
Tb427-030006700	Tb427-080064300	Tb427-070071500	Tb427-100024200		Tb427-090015200
Tb427-020023200	Tb427-100145700	Tb427-060031900	Tb427-010008500		Tb427-110110900
Tb427-080071200	Tb427-080059400	Tb427-030029800	Tb427-090048400		Tb427-070022100
Tb427-050039600	Tb427-010009900	Tb427-110063800	Tb427-040032600		Tb427-100037900
Tb427-050022300	Tb427-110101800	Tb427-090092100	Tb427-110152800		Tb427-100094300
Tb427-050041700	Tb427-110165200	Tb427-080070600	Tb427-020024500		Tb427-100082600
Tb427-030017300:pseudogene	Tb427-040026800	Tb427-040017000	Tb427-030050300		Tb427-000311000:pseudogene
Tb427-060040800	Tb427-050017100	Tb427-060024800	Tb427-050051900		Tb427-000578700:pseudogene
Tb427-050022100	Tb427-070076900	Tb427-100029300	Tb427-110050600		Tb427-030008600
Tb427-100118400	Tb427-040023900	Tb427-100020900	Tb427-050012500		Tb427-110124400
Tb427-050052100	Tb427-070060900	Tb427-070075000	Tb427-110007300		Tb427-100039800
Tb427-110067300	Tb427-040025700	Tb427-070015900	Tb427-050045600		Tb427-110189000
Tb427-000107900	Tb427-000708300:pseudogene	Tb427-060034700	Tb427-100122600		Tb427-000245800:pseudogene
Tb427-090070600	Tb427-090050800	Tb427-040035600	Tb427-090082100		Tb427-000198100:pseudogene
Tb427-100068800	Tb427-070046400	Tb427-030028200	Tb427-070068200		Tb427-000750000:pseudogene
Tb427-090044700	Tb427-050038200	Tb427-040021200	Tb427-100069200		Tb427-050045400
Tb427-020020600	Tb427-030047800	Tb427-060043500	Tb427-090037600		Tb427-060044200
Tb427-110156300	Tb427-100030100	Tb427-030046000	Tb427-040034700		Tb427-050005600
Tb427-090079600	Tb427-060044300	Tb427-100059800	Tb427-100149300		Tb427-110097900
Tb427-110018900	Tb427-110137100	Tb427-110135300	Tb427-080005500		Tb427-110013600
Tb427-100097200	Tb427-000107900	Tb427-110086400	Tb427-010020200		Tb427-000721100
Tb427-040044000	Tb427-110017000	Tb427-050038400	Tb427-060032600		Tb427-080054000
Tb427-050043400	Tb427-010023100	Tb427-080007100	Tb427-090090700		Tb427-080044500
Tb427-080035300	Tb427-110181100	Tb427-060034100	Tb427-080024000		Tb427-080050600
Tb427-080043900	Tb427-110175700:pseudogene	Tb427-040019800	Tb427-060038900		Tb427-040038400
Tb427-090022600	Tb427-100093700	Tb427-060055200	Tb427-110174900		Tb427-010029800
Tb427-070014000	Tb427-080020600	Tb427-040037600	Tb427-110016200		Tb427-110182600
Tb427-030005900	Tb427-010005700	Tb427-070077000	Tb427-110163500		Tb427-010023000
Tb427-100035700	Tb427-080086500	Tb427-090067000	Tb427-020030700		Tb427-070057300
Tb427-110072000	Tb427-090092800:pseudogene	Tb427-110017700	Tb427-090021600		Tb427-050006200
Tb427-100118300	Tb427-110021900	Tb427-110150000	Tb427-020016700		Tb427-100023300
Tb427-040025400	Tb427-100092300	Tb427-100120500	Tb427-000366800:pseudogene		Tb427-090063500
Tb427-100014000	Tb427-100072900	Tb427-050014300	Tb427-110103600		Tb427-080037300
Tb427-010015700	Tb427-080029200	Tb427-040044000	Tb427-000481200:pseudogene		Tb427-080026900
Tb427-020032500	Tb427-070072600	Tb427-090069000	Tb427-080008100		Tb427-080058100
Tb427-080056700	Tb427-070015700	Tb427-110074000	Tb427-050022800		Tb427-060011900
Tb427-090088800	Tb427-040035400	Tb427-100038200	Tb427-110179300		Tb427-100161100
Tb427-060029900	Tb427-110163700	Tb427-070050500	Tb427-100110700		Tb427-080017000
Tb427-050039400	Tb427-100135800	Tb427-060055600	Tb427-040047300		Tb427-110084400
Tb427-010013700	Tb427-050018100	Tb427-000702600	Tb427-110094200		Tb427-010014400
Tb427-100122800	Tb427-020005700	Tb427-030005800	Tb427-110053200		Tb427-080077600
Tb427-110166900	Tb427-010014600	Tb427-110005400	Tb427-110140700		Tb427-030049700
Tb427-030022300	Tb427-090044600:pseudogene	Tb427-050025900	Tb427-110157400		Tb427-000781200:pseudogene
Tb427-070061600	Tb427-060031300	Tb427-030055400	Tb427-010032200		Tb427-050039500
Tb427-100161500	Tb427-070046300	Tb427-080036300	Tb427-090046400		Tb427-100124800
Tb427-040028100	Tb427-050026800	Tb427-050052900	Tb427-040013200		Tb427-000174400:pseudogene
Tb427-100151200:pseudogene	Tb427-070055100	Tb427-040032900	Tb427-060012100		Tb427-080053100
Tb427-040016300	Tb427-080029800	Tb427-040006500	Tb427-060029700		Tb427-090005300
Tb427-110170500	Tb427-110052400	Tb427-100168100	Tb427-070067200		Tb427-100083700
Tb427-090059800	Tb427-100058300	Tb427-050017300	Tb427-110154300		Tb427-030006000
Tb427-110010700	Tb427-090065700	Tb427-100132600	Tb427-100048800
Tb427-040017600	Tb427-030017200	Tb427-100140800	Tb427-030055400
Tb427-110016400	Tb427-070039800	Tb427-110106900	Tb427-040010000
Tb427-090084600	Tb427-110099500	Tb427-040041500	Tb427-040006900
Tb427-030021000	Tb427-100149000	Tb427-080025700	Tb427-090088800
Tb427-070083300:pseudogene	Tb427-100042000	Tb427-070057000	Tb427-080005800
Tb427-030012200	Tb427-040017400	Tb427-010016200	Tb427-100120500
Tb427-030057900	Tb427-000347900	Tb427-100135400	Tb427-090093200
Tb427-100107400	Tb427-090040900	Tb427-080064100	Tb427-100024000
Tb427-090085700	Tb427-040032900	Tb427-080084200	Tb427-110005400
Tb427-110163700	Tb427-100085900	Tb427-050047100	Tb427-020005700
Tb427-110090700	Tb427-100137400	Tb427-080069700	Tb427-100059600
Tb427-110189500	Tb427-030051700	Tb427-090088200	Tb427-030048000
Tb427-070074000	Tb427-100095900	Tb427-090021600	Tb427-110063500
Tb427-110066700	Tb427-080012200:pseudogene	Tb427-110083400	Tb427-110034900
Tb427-080041000	Tb427-080026400	Tb427-030033000	Tb427-100122800
Tb427-090091200	Tb427-070027900	Tb427-100078100	Tb427-110032000
Tb427-100154500	Tb427-110094400	Tb427-020030700	Tb427-030048500
Tb427-090041100	Tb427-070054600	Tb427-110153100	Tb427-040019600
Tb427-110157900	Tb427-080068900	Tb427-050032300	Tb427-100040700
Tb427-110038300	Tb427-080035700	Tb427-070017400	Tb427-110133600
Tb427-110102900	Tb427-010019200	Tb427-090070100	Tb427-000549200:pseudogene
Tb427-110034600	Tb427-110120300	Tb427-050037000	Tb427-080019500
Tb427-110099400	Tb427-040026100	Tb427-110092000	Tb427-000765700
Tb427-100008700	Tb427-100052300	Tb427-110138700	Tb427-110137700
Tb427-080007000	Tb427-100072600	Tb427-090062100	Tb427-000273200:pseudogene
Tb427-090039300	Tb427-000655300:pseudogene	Tb427-100042400	Tb427-050045300
Tb427-010028200	Tb427-040041500	Tb427-050033800	Tb427-110150400
Tb427-110121100	Tb427-050006300	Tb427-000516300:pseudogene	Tb427-000271200:pseudogene
Tb427-090087400	Tb427-070023100	Tb427-040014200	Tb427-000349200
Tb427-080057200	Tb427-100142400	Tb427-100069800	Tb427-060019200
Tb427-110046400:pseudogene	Tb427-110078300	Tb427-050027300	Tb427-090044500:pseudogene
Tb427-030028400	Tb427-100125800	Tb427-000516000:pseudogene	Tb427-110111500
Tb427-100143900	Tb427-030058000	Tb427-100150400	Tb427-100122900
Tb427-090008000	Tb427-080034000	Tb427-090057500	Tb427-060005800:pseudogene
Tb427-040044500	Tb427-080031900	Tb427-040045000	Tb427-080008200
Tb427-090014400	Tb427-100013700	Tb427-110087600	Tb427-000708300:pseudogene
Tb427-100070800	Tb427-070084300	Tb427-110173600	Tb427-050020800
Tb427-000501900	Tb427-050036900	Tb427-080070700	Tb427-000840600:pseudogene
Tb427-080047700	Tb427-090069700:pseudogene	Tb427-080013100	Tb427-050043400
Tb427-040027300	Tb427-080061900	Tb427-080055400	Tb427-110062600
Tb427-070061300	Tb427-110052600:pseudogene	Tb427-090012900	Tb427-090092100
Tb427-110096400	Tb427-080066500	Tb427-030018000	Tb427-100039200
Tb427-000500400	Tb427-110143100	Tb427-030041700	Tb427-070013300
Tb427-070040100	Tb427-020009000	Tb427-090018900	Tb427-090026900
Tb427-100033600	Tb427-100040100	Tb427-040027900	Tb427-070037800
Tb427-100150500	Tb427-060007500	Tb427-090048000	Tb427-060044000
Tb427-080010200:pseudogene	Tb427-060045900	Tb427-100027100	Tb427-110018600
Tb427-080039000	Tb427-100026400	Tb427-030012000	Tb427-110163700
Tb427-110097400	Tb427-110109800	Tb427-110088200	Tb427-100088000
Tb427-050033100	Tb427-100090600	Tb427-080023400	Tb427-000797400:pseudogene
Tb427-100086600	Tb427-090039900	Tb427-100069400	Tb427-080086300:pseudogene
Tb427-110034800	Tb427-100027600	Tb427-100046800	Tb427-070020000
Tb427-070067200	Tb427-110080000	Tb427-100076800	Tb427-080085700
Tb427-090069800	Tb427-070013400	Tb427-000008100:pseudogene	Tb427-080005700
Tb427-100076500	Tb427-050011700	Tb427-080085900	Tb427-010015500
Tb427-110079600	Tb427-020013200	Tb427-110079400	Tb427-040032000
Tb427-110026700	Tb427-000720400:pseudogene	Tb427-030034000	Tb427-100007400
Tb427-090083100	Tb427-110083300	Tb427-090067800	Tb427-070071700
Tb427-100089300	Tb427-000736400:pseudogene	Tb427-110132700	Tb427-100048700
Tb427-110068800	Tb427-070006600	Tb427-080039600	Tb427-030018500
Tb427-030048800	Tb427-090011500	Tb427-100147000	Tb427-000737400
Tb427-100055000	Tb427-040038400	Tb427-000107400	Tb427-090057400
Tb427-090072900	Tb427-100049500	Tb427-090041100	Tb427-010031000
Tb427-080035800	Tb427-040036200	Tb427-110155600	Tb427-040051800
Tb427-110173700	Tb427-090076700	Tb427-070081100	Tb427-100040200
Tb427-070070500	Tb427-110110400	Tb427-000222800:pseudogene	Tb427-070005600
Tb427-080024100	Tb427-110165300	Tb427-070027400	Tb427-000349300
Tb427-100157600	Tb427-110014100	Tb427-080021600	Tb427-090076700
Tb427-110156600	Tb427-110179400	Tb427-090081200	Tb427-100104300
Tb427-070077000	Tb427-070048600	Tb427-070015700	Tb427-080031300:pseudogene
Tb427-070013400	Tb427-060014200	Tb427-110051800	Tb427-020026900
Tb427-100024000	Tb427-110157300	Tb427-050009800	Tb427-010032000
Tb427-000014600:pseudogene	Tb427-100078500	Tb427-080083200	Tb427-000783200:pseudogene
Tb427-020032900	Tb427-070018100	Tb427-110008400	Tb427-030034300
Tb427-100106200	Tb427-050009200	Tb427-000766300:pseudogene	Tb427-030032800
Tb427-110064700	Tb427-040048400	Tb427-080042200	Tb427-090079600
Tb427-090035600	Tb427-050012100	Tb427-020025300	Tb427-070050900
Tb427-000485500	Tb427-040028300	Tb427-080080200	Tb427-100038200
Tb427-110174000	Tb427-040012500	Tb427-050025700	Tb427-050023100
Tb427-110078200	Tb427-040011100	Tb427-110140000	Tb427-030026800
Tb427-050011400	Tb427-070067100	Tb427-040057000	Tb427-100067100
Tb427-090057900	Tb427-060036700	Tb427-000173900	Tb427-110009400
Tb427-110187700	Tb427-100133800	Tb427-090038100	Tb427-080044600
Tb427-010028000	Tb427-070058200	Tb427-070038300	Tb427-040027300
Tb427-090051700	Tb427-070036500	Tb427-070063200	Tb427-110140300
Tb427-110037000	Tb427-020031300	Tb427-100158300	Tb427-100150600
Tb427-070019300	Tb427-110173700	Tb427-080059600	Tb427-070062900
Tb427-000578800	Tb427-100107400	Tb427-030052100	Tb427-070010300
Tb427-110156000	Tb427-040054000	Tb427-100130400	Tb427-100149900
Tb427-070019200	Tb427-060026200	Tb427-110163900	Tb427-070063600
Tb427-090083300	Tb427-040010300	Tb427-110021100	Tb427-080023100
Tb427-100096300	Tb427-050034900	Tb427-090008200	Tb427-070021000:pseudogene
Tb427-080034400	Tb427-100147300	Tb427-110133900	Tb427-000806000:pseudogene
Tb427-010010900	Tb427-000678500	Tb427-100097500	Tb427-030014700
Tb427-100051500	Tb427-070018800	Tb427-060007500	Tb427-010023100
Tb427-110189800	Tb427-110091700	Tb427-110107800	Tb427-020026000
Tb427-050033800	Tb427-000544500:pseudogene	Tb427-070024100	Tb427-100027100
Tb427-040053800	Tb427-110005000	Tb427-100128500	Tb427-110059300
Tb427-110172600	Tb427-080070400	Tb427-080048500	Tb427-000445700:pseudogene
Tb427-110168400	Tb427-000445400	Tb427-100053100	Tb427-050042500
Tb427-010010000	Tb427-080031000	Tb427-100071700	Tb427-100158600
Tb427-050035200	Tb427-100079600	Tb427-070009700	Tb427-070020700
Tb427-020011700	Tb427-110048900	Tb427-110075400	Tb427-080078400
Tb427-070062900	Tb427-090091500	Tb427-100120000	Tb427-110140800
Tb427-020030700	Tb427-040044100	Tb427-100016900	Tb427-090039400
Tb427-100070000	Tb427-100145900	Tb427-100157000	Tb427-110177800
Tb427-100137900	Tb427-110145400	Tb427-110081000	Tb427-110164400
Tb427-040019300	Tb427-090083800	Tb427-080058900	Tb427-110157600
Tb427-100048800	Tb427-090085900	Tb427-100170400	Tb427-110173500
Tb427-030005800	Tb427-100106900	Tb427-090006000	Tb427-100153200
Tb427-030042300	Tb427-040005100	Tb427-110153800	Tb427-080053500
Tb427-100044300	Tb427-090038500	Tb427-110029700	Tb427-050038100
Tb427-050034400	Tb427-110140200	Tb427-100024200	Tb427-100026300
Tb427-000660700	Tb427-090079900	Tb427-020006800	Tb427-080087600
Tb427-050012400	Tb427-080084400	Tb427-080012700	Tb427-060055600
Tb427-100170200	Tb427-070036000	Tb427-110179900	Tb427-000745700
Tb427-110097000	Tb427-070084400	Tb427-090046600	Tb427-100084300
Tb427-100065700	Tb427-040009800	Tb427-060041000	Tb427-110065200
Tb427-050010400:pseudogene	Tb427-100030400	Tb427-030022500	Tb427-070061900
Tb427-010013500	Tb427-100129000	Tb427-070080100	Tb427-100034000
Tb427-100083900	Tb427-100037600	Tb427-070054100	Tb427-090082200
Tb427-060038900	Tb427-030030300	Tb427-000014800	Tb427-110091200
Tb427-100104900	Tb427-080053900	Tb427-070020300	Tb427-100027200
Tb427-100006300	Tb427-070007000	Tb427-110182100	Tb427-060044600
Tb427-070049800	Tb427-100157300	Tb427-080050100	Tb427-080087400
Tb427-060046000	Tb427-000358400	Tb427-070024000	Tb427-050028000
Tb427-110091200	Tb427-050028200	Tb427-020018000	Tb427-090023100
Tb427-110048900	Tb427-090023200	Tb427-110126900	Tb427-110045000
Tb427-100038400	Tb427-080058900	Tb427-010012600	Tb427-100049400
Tb427-110153200	Tb427-050022900	Tb427-100135100	Tb427-110150900
Tb427-070017500	Tb427-110190200	Tb427-110140300	Tb427-100160000
Tb427-090019500	Tb427-110110100	Tb427-050020700	Tb427-080016800
Tb427-110144300	Tb427-030042800	Tb427-110012500	Tb427-000851600
Tb427-090076700	Tb427-080047800	Tb427-080063700	Tb427-110154500
Tb427-030054400	Tb427-000108700	Tb427-070029200	Tb427-110046300
Tb427-030005600:pseudogene	Tb427-090012400	Tb427-060041700	Tb427-090080000
Tb427-100145600	Tb427-030018400	Tb427-040052300	Tb427-110033200
Tb427-100126400	Tb427-050031400	Tb427-090062700	Tb427-040017000
Tb427-080036100	Tb427-110014000	Tb427-100106600	Tb427-050017800
Tb427-110166500	Tb427-090013500	Tb427-070062400	Tb427-070015400
Tb427-070048700	Tb427-000638900	Tb427-110107000	Tb427-000696100:pseudogene
Tb427-040036800	Tb427-100152700	Tb427-080081500	Tb427-110177400
Tb427-070061500	Tb427-070054100	Tb427-080032300	Tb427-070020500
Tb427-040031900	Tb427-110105900	Tb427-040014300	Tb427-040031600
Tb427-070077100	Tb427-100006800	Tb427-030016600	Tb427-030057600
Tb427-070025100	Tb427-110083000	Tb427-070022300	Tb427-100140200
Tb427-000748100	Tb427-030043000	Tb427-030055200	Tb427-100158000
Tb427-110088600	Tb427-110066000	Tb427-080023500	Tb427-100032500
Tb427-020010100	Tb427-100138200	Tb427-000276700:pseudogene	Tb427-110086000
Tb427-110047700	Tb427-040049400	Tb427-030039300	Tb427-110075700
Tb427-010013800	Tb427-030012400	Tb427-000347900	Tb427-090027800
Tb427-100040400	Tb427-060030400	Tb427-080068300	Tb427-080022900
Tb427-000022300:pseudogene	Tb427-090032600	Tb427-100016700	Tb427-110085200
Tb427-110082900	Tb427-100046600	Tb427-100011300	Tb427-030040900
Tb427-100024200	Tb427-070044100	Tb427-110123600	Tb427-070017500
Tb427-030030500	Tb427-030015400	Tb427-090015200	Tb427-030011400
Tb427-110056500	Tb427-100140600	Tb427-100028500	Tb427-000835100
Tb427-000851600	Tb427-100114100:pseudogene	Tb427-110164000	Tb427-110110900
Tb427-010007200	Tb427-000683400:pseudogene	Tb427-080085200	Tb427-040033400
Tb427-080069500	Tb427-060039600	Tb427-100037900	Tb427-070022100
Tb427-100060800	Tb427-110151400	Tb427-100094300	Tb427-110140500
Tb427-100011200	Tb427-090072600	Tb427-040053200	Tb427-050025100
Tb427-000814000:pseudogene	Tb427-040012100	Tb427-110028100	Tb427-100082600
Tb427-080080600	Tb427-020008300	Tb427-090070600	Tb427-100122200
Tb427-100096500	Tb427-100085000	Tb427-110100700	Tb427-000311000:pseudogene
Tb427-110050900	Tb427-100039900	Tb427-000578700:pseudogene	Tb427-030008600
Tb427-110078000	Tb427-100050100:pseudogene	Tb427-100033800	Tb427-110124400
Tb427-050044200	Tb427-070082900:pseudogene	Tb427-050050700	Tb427-100058500
Tb427-110090900	Tb427-110119300	Tb427-100039800	Tb427-110189000
Tb427-000673500	Tb427-110035100	Tb427-060039900	Tb427-000245800:pseudogene
Tb427-090067900	Tb427-020030100	Tb427-110135700	Tb427-010013300
Tb427-030007700	Tb427-000733000:pseudogene	Tb427-030041200	Tb427-070064900
Tb427-110088100	Tb427-080023300	Tb427-000198100:pseudogene	Tb427-000750000:pseudogene
Tb427-070008800	Tb427-100115900	Tb427-020020200	Tb427-050010400:pseudogene
Tb427-080086900	Tb427-000015800	Tb427-000809800	Tb427-060044800
Tb427-050021400	Tb427-050007900	Tb427-050027000	Tb427-080048300
Tb427-000783700	Tb427-000701700:pseudogene	Tb427-080077000	Tb427-050045400
Tb427-030049800	Tb427-110059200	Tb427-100087700	Tb427-000015600:pseudogene
Tb427-110080100	Tb427-050015400	Tb427-090068600	Tb427-060044200
Tb427-110104800	Tb427-050052900	Tb427-050005600	Tb427-110097900
Tb427-110045000	Tb427-050018800	Tb427-110013600	Tb427-110099100
Tb427-000109200:pseudogene	Tb427-100113400	Tb427-070018800	Tb427-110181000
Tb427-100156500	Tb427-000703500:pseudogene	Tb427-000695900:pseudogene	Tb427-000721100
Tb427-090056200	Tb427-090077200	Tb427-100107800	Tb427-080054000
Tb427-100135100	Tb427-110029700	Tb427-080044500	Tb427-060011600
Tb427-060056600:pseudogene	Tb427-040049700	Tb427-070080000
Tb427-110028000	Tb427-010010300	Tb427-080050600
Tb427-030027600	Tb427-080029400	Tb427-040038400
Tb427-100112900	Tb427-080063600	Tb427-100170600
Tb427-080025000	Tb427-030015100	Tb427-090090700
Tb427-000175400	Tb427-110185200	Tb427-060042600
Tb427-000658400	Tb427-110065000	Tb427-050009200
Tb427-110147000	Tb427-080041100	Tb427-010029800
Tb427-050010000	Tb427-110011200	Tb427-110182600
Tb427-100136700	Tb427-010008200	Tb427-010024700
Tb427-110184800	Tb427-010022200	Tb427-000765700
Tb427-110140000	Tb427-000840600:pseudogene	Tb427-100149400
Tb427-060031800	Tb427-050047800	Tb427-040038100
Tb427-090023600	Tb427-060040300	Tb427-010023000
Tb427-020021700	Tb427-110071300	Tb427-110106100
	Tb427-040016100	Tb427-090082000
	Tb427-100140300	Tb427-030023500
	Tb427-050038100	Tb427-070015400
	Tb427-100085800	Tb427-080051200
	Tb427-010005500	Tb427-100133500:pseudogene
	Tb427-110040300	Tb427-070052100
	Tb427-110176600	Tb427-010014900
	Tb427-110154800	Tb427-070057300
	Tb427-080068500	Tb427-110070600
	Tb427-000349200	Tb427-050006200
	Tb427-010010000	Tb427-100023300
	Tb427-110086400	Tb427-090063500
	Tb427-020017600	Tb427-100019700
	Tb427-100116900	Tb427-080037300
	Tb427-110020100	Tb427-070039500
	Tb427-090093100	Tb427-040032600
	Tb427-110172100	Tb427-090083600
	Tb427-110057200	Tb427-060012600
	Tb427-070031900	Tb427-110084500:pseudogene
	Tb427-030057100	Tb427-000851600
	Tb427-000270200:pseudogene	Tb427-080026900
	Tb427-090053800	Tb427-080058100
	Tb427-070068200	Tb427-060011900
	Tb427-000721000	Tb427-100161100
	Tb427-020008600	Tb427-080017000
	Tb427-100009400	Tb427-070069100
	Tb427-060036300	Tb427-110084400
	Tb427-100106300	Tb427-070042300
	Tb427-070027800	Tb427-000762800:pseudogene
	Tb427-020026600	Tb427-000835100
	Tb427-110139800	Tb427-010014400
	Tb427-040016500	Tb427-040033200
	Tb427-100125500	Tb427-080037500
	Tb427-030037400	Tb427-080077600
	Tb427-100065300	Tb427-040018500
	Tb427-050016500	Tb427-100150600
	Tb427-000277800	Tb427-070047000
	Tb427-000174900	Tb427-030049700
	Tb427-110144200	Tb427-000781200:pseudogene
	Tb427-110172700	Tb427-100110300
	Tb427-090071700	Tb427-050039500
	Tb427-080079100	Tb427-050007000:pseudogene
	Tb427-090057900	Tb427-100124800
	Tb427-100126500	Tb427-080016200:pseudogene
	Tb427-100104400	Tb427-110189600
	Tb427-110155800	Tb427-110032200
	Tb427-030024100	Tb427-100027600
	Tb427-000311900:pseudogene	Tb427-000174400:pseudogene
	Tb427-030031100	Tb427-020005600
	Tb427-050040600	Tb427-070073900
	Tb427-100063000	Tb427-080053100
	Tb427-070036900	Tb427-090005300
	Tb427-050014500	Tb427-100104100
	Tb427-110127200	Tb427-030040800
	Tb427-040032400	Tb427-110081500
	Tb427-070052800	Tb427-110100400
	Tb427-080022700	Tb427-100083700
	Tb427-070069500	Tb427-030006000
[truncated: 66 more rows]

## Sheet: cell cycle phase markers
Cell cycle phase marker genes. Marker genes identified by Arhcer et al 2011 (PLoS One) in the T. brucei TREU927 reference gene were selected.
Syntenic orthologs for each marker where identified for the Lister427 (2018) reference genome using the TritrypDB web service and are listed below
Early G1	Late G1	S phase	G2/M phase
Tb427-010013900	Tb427-010010700	Tb427-010008000	Tb427-010020200
Tb427-010017000	Tb427-010015000	Tb427-010011200	Tb427-010024300
Tb427-010023900	Tb427-010016900	Tb427-010014800	Tb427-010024600
Tb427-020031500	Tb427-010020500	Tb427-010017700	Tb427-010028500
Tb427-030033700	Tb427-010022700	Tb427-010019400	Tb427-010033100
Tb427-030042200	Tb427-010024800	Tb427-010020000	Tb427-020011600
Tb427-030048400	Tb427-010030000	Tb427-010029100	Tb427-020021100
Tb427-040021400	Tb427-010030200	Tb427-020023400	Tb427-020025300
Tb427-040030200	Tb427-010032000	Tb427-020027400	Tb427-020029700
Tb427-040052800	Tb427-020024900	Tb427-020030200	Tb427-030010200
Tb427-050009000	Tb427-020027500	Tb427-030009000	Tb427-030027300
Tb427-050012400	Tb427-020031400	Tb427-030018700	Tb427-030028700
Tb427-050018300	Tb427-020032100	Tb427-030019900	Tb427-030029500
Tb427-050022800	Tb427-030006600	Tb427-030020200	Tb427-030032600
Tb427-060048100	Tb427-030006700	Tb427-030022800	Tb427-030040700
Tb427-060056300	Tb427-030008400	Tb427-030037700	Tb427-030042000
Tb427-070014200	Tb427-030009300	Tb427-030057200	Tb427-030046200
Tb427-070014300	Tb427-030009700	Tb427-040005000	Tb427-030050100
Tb427-070021800	Tb427-030013900	Tb427-040010600	Tb427-030057000
Tb427-070021900	Tb427-030016700	Tb427-040028500	Tb427-040015200
Tb427-070041200	Tb427-030018300	Tb427-040044000	Tb427-040037200
Tb427-070045100	Tb427-030028200	Tb427-040047900	Tb427-040039800
Tb427-070049300	Tb427-030028500	Tb427-040054500	Tb427-040050400
Tb427-070055900	Tb427-030029400	Tb427-040056500	Tb427-040050500
Tb427-080052400	Tb427-030037200	Tb427-050013300	Tb427-040052400
Tb427-080052500	Tb427-030050500	Tb427-050015900	Tb427-050010100
Tb427-080061400	Tb427-030053000	Tb427-050036000	Tb427-050025100
Tb427-080066300	Tb427-030055500	Tb427-050043300	Tb427-050025300
Tb427-080068700	Tb427-030056100	Tb427-050049700	Tb427-050025700
Tb427-080072100	Tb427-030057800	Tb427-050052600	Tb427-050051300
Tb427-090033100	Tb427-030059700	Tb427-060009100	Tb427-050051800
Tb427-090033200	Tb427-040015600	Tb427-060033600	Tb427-050052200
Tb427-090033300	Tb427-040025200	Tb427-060036600	Tb427-060052300
Tb427-090033400	Tb427-040026500	Tb427-060036900	Tb427-060053400
Tb427-090033700	Tb427-040027000	Tb427-070009500	Tb427-070009700
Tb427-090033800	Tb427-040027400	Tb427-070012600	Tb427-070024000
Tb427-090034000	Tb427-040033700	Tb427-070025700	Tb427-070031000
Tb427-090073700	Tb427-040036000	Tb427-070027500	Tb427-070054300
Tb427-100010200	Tb427-040043500	Tb427-070033500	Tb427-070054700
Tb427-100014200	Tb427-040044500	Tb427-070038600	Tb427-070056100
Tb427-100057700	Tb427-040054600	Tb427-070057900	Tb427-070063200
Tb427-100057800	Tb427-050010000	Tb427-070062400	Tb427-070068000
Tb427-100060200	Tb427-050013100	Tb427-070066600	Tb427-080008300
Tb427-100062900	Tb427-050016600	Tb427-070066700	Tb427-080017800
Tb427-100091300	Tb427-050017400	Tb427-070066800	Tb427-080018800
Tb427-100109200	Tb427-050020700	Tb427-070071900	Tb427-080022000
Tb427-100142000	Tb427-050021300	Tb427-070072300	Tb427-080042800
Tb427-100148200	Tb427-050030200	Tb427-070082300	Tb427-080044700
Tb427-100153800	Tb427-050034300	Tb427-080007300	Tb427-080048400
Tb427-100155400	Tb427-050034400	Tb427-080011700	Tb427-080054800
Tb427-100157200	Tb427-050036200	Tb427-080037000	Tb427-080055200
Tb427-110013700	Tb427-050039100	Tb427-080038600	Tb427-080055300
Tb427-110025400	Tb427-050041100	Tb427-080047300	Tb427-080061100
Tb427-110025500	Tb427-050041600	Tb427-080076100	Tb427-080066900
Tb427-110035000	Tb427-050043800	Tb427-080085200	Tb427-080068100
Tb427-110055400	Tb427-050048400	Tb427-090005000	Tb427-080072900
Tb427-110065400	Tb427-050052100	Tb427-090008400	Tb427-080085400
Tb427-110066700	Tb427-060012000	Tb427-090034100	Tb427-090017600
Tb427-110072900	Tb427-060012400	Tb427-090040300	Tb427-090025700
Tb427-110097800	Tb427-060015400	Tb427-090055600	Tb427-090026300
Tb427-110097900	Tb427-060015800	Tb427-090080400	Tb427-090034200
Tb427-110098000	Tb427-060020000	Tb427-090085100	Tb427-090042800
Tb427-110134000	Tb427-060034100	Tb427-100054000	Tb427-090050200
Tb427-110150500	Tb427-060035500	Tb427-100067700	Tb427-090052200
	Tb427-060037300	Tb427-100069800	Tb427-090087700
	Tb427-060037500	Tb427-100078300	Tb427-100011500
	Tb427-060038400	Tb427-100104100	Tb427-100011800
	Tb427-060039200	Tb427-100108800	Tb427-100043800
	Tb427-060040700	Tb427-100108900	Tb427-100048500
	Tb427-060043800	Tb427-100109100	Tb427-100054300
	Tb427-060046000	Tb427-100112300	Tb427-100058100
	Tb427-060051900	Tb427-100112400	Tb427-100063000
	Tb427-060053000	Tb427-100136400	Tb427-100065300
	Tb427-060055900	Tb427-100138100	Tb427-100077200
	Tb427-070005500	Tb427-100140000	Tb427-100096100
	Tb427-070008300	Tb427-100165700	Tb427-100097100
	Tb427-070009100	Tb427-110013600	Tb427-100102600
	Tb427-070010600	Tb427-110015000	Tb427-100110400
	Tb427-070010900	Tb427-110015800	Tb427-100125300
	Tb427-070018400	Tb427-110015900	Tb427-100127300
	Tb427-070020200	Tb427-110031900	Tb427-100134100
	Tb427-070028500	Tb427-110032000	Tb427-100153200
	Tb427-070030300	Tb427-110037600	Tb427-100153300
	Tb427-070037000	Tb427-110065500	Tb427-100161200
	Tb427-070039400	Tb427-110070500	Tb427-100162600
	Tb427-070045300	Tb427-110070600	Tb427-110007400
	Tb427-070051300	Tb427-110088100	Tb427-110030300
	Tb427-070053700	Tb427-110098700	Tb427-110030600
	Tb427-070058900	Tb427-110101100	Tb427-110042200
	Tb427-070060500	Tb427-110120500	Tb427-110045400
	Tb427-070062300	Tb427-110124600	Tb427-110070300
	Tb427-070063100	Tb427-110127700	Tb427-110072100
	Tb427-070065100	Tb427-110145200	Tb427-110085200
	Tb427-070066500	Tb427-110147900	Tb427-110089900
	Tb427-070066600	Tb427-110166800	Tb427-110120700
	Tb427-070068800	Tb427-110176500	Tb427-110121400
	Tb427-070073300	Tb427-110183600	Tb427-110123200
	Tb427-070075000		Tb427-110125400
	Tb427-070076600		Tb427-110127600
	Tb427-070079100		Tb427-110137000
	Tb427-070080400		Tb427-110138800
	Tb427-070080900		Tb427-110146500
	Tb427-080005600		Tb427-110147100
	Tb427-080006300		Tb427-110152700
	Tb427-080009800		Tb427-110154200
	Tb427-080021800		Tb427-110157100
	Tb427-080028700		Tb427-110160900
	Tb427-080035000		Tb427-110161600
	Tb427-080035100		Tb427-110167200
	Tb427-080040400		Tb427-110169500
	Tb427-080040700		Tb427-110175100
	Tb427-080043400
	Tb427-080045400
	Tb427-080047200
	Tb427-080053900
	Tb427-080054300
	Tb427-080059400
	Tb427-080066400
	Tb427-080069900
	Tb427-080077000
	Tb427-080081200
	Tb427-090006600
	Tb427-090007800
	Tb427-090008000
	Tb427-090013700
	Tb427-090029200
	Tb427-090029500
	Tb427-090030900
	Tb427-090037700
	Tb427-090048300
	Tb427-090049200
	Tb427-090055200
	Tb427-090056700
	Tb427-090059100
	Tb427-090064200
	Tb427-090066600
	Tb427-090068200
	Tb427-090070900
	Tb427-090071900
	Tb427-090078400
	Tb427-090085200
	Tb427-090085500
	Tb427-090088700
	Tb427-090089900
	Tb427-090090900
	Tb427-090091200
	Tb427-100006900
	Tb427-100008700
	Tb427-100011900
	Tb427-100012000
	Tb427-100016400
	Tb427-100022200
	Tb427-100022600
	Tb427-100026200
	Tb427-100031200
	Tb427-100036200
	Tb427-100036400
	Tb427-100044300
	Tb427-100046500
	Tb427-100051400
	Tb427-100051500
	Tb427-100056700
	Tb427-100059400
	Tb427-100060700
	Tb427-100064300
	Tb427-100069400
	Tb427-100076000
	Tb427-100078600
	Tb427-100083900
	Tb427-100085500
	Tb427-100089600
	Tb427-100090100
	Tb427-100095000
	Tb427-100096800
	Tb427-100096900
	Tb427-100097800
	Tb427-100099600
	Tb427-100105200
	Tb427-100105500
	Tb427-100108200
	Tb427-100117300
	Tb427-100120400
	Tb427-100125900
	Tb427-100127700
	Tb427-100128700
	Tb427-100129200
	Tb427-100135800
	Tb427-100136700
	Tb427-100140900
	Tb427-100147900
	Tb427-100148300
	Tb427-100152200
	Tb427-100162000
	Tb427-100165000
	Tb427-100170300
	Tb427-110006600
	Tb427-110007300
	Tb427-110012500
	Tb427-110014200
	Tb427-110016700
	Tb427-110017900
	Tb427-110019200
	Tb427-110028000
	Tb427-110029900
	Tb427-110037700
	Tb427-110038000
	Tb427-110047000
	Tb427-110047300
	Tb427-110050200
	Tb427-110050900
	Tb427-110051800
	Tb427-110053500
	Tb427-110055200
	Tb427-110058400
	Tb427-110059200
	Tb427-110060800
	Tb427-110061500
	Tb427-110061800
	Tb427-110064800
	Tb427-110076200
	Tb427-110082700
	Tb427-110085600
	Tb427-110085800
	Tb427-110086500
	Tb427-110089800
	Tb427-110090000
	Tb427-110091600
	Tb427-110093700
	Tb427-110094400
	Tb427-110095000
	Tb427-110095800
	Tb427-110096100
	Tb427-110103400
	Tb427-110111500
	Tb427-110121900
	Tb427-110124500
	Tb427-110132000
	Tb427-110132100
	Tb427-110132300
	Tb427-110135700
	Tb427-110138200
	Tb427-110144100
	Tb427-110154700
	Tb427-110155500
	Tb427-110164800
	Tb427-110165200
	Tb427-110165900
	Tb427-110166400
	Tb427-110166700
	Tb427-110167000
	Tb427-110167300
	Tb427-110167700
	Tb427-110169200
	Tb427-110169400
	Tb427-110180600
	Tb427-110180800
	Tb427-110183500
	Tb427-110186200
