# Supplementary material for: Profiling the bloodstream form and procyclic form Trypanosoma brucei cell cycle using single-cell transcriptomics
Source: eLife. 2023 May 11;12:e86325. doi: 10.7554/eLife.86325 (PMC10212563; doi:10.7554/eLife.86325)
Supplement: Supplementary file 4. — (Tab 1) PseudotimeDE analysis. (Tab 2) PseudotimeDE results for CCR genes only. (Tab 3) Average expression of each CCR per phase. (Tab 4) Dataset comparison of CCR genes. (Tab 5) Comparison with Crozier proteomics study. (Tab 6) Comparison with Benz proteomics study. [file elife-86325-supp4.xlsx]

## Sheet: PCF_DE_log_all_stats
DE analysis of genes across pseudotime infereacne of the PCF cell cycle.
CCR selected based on meanlogFC (>1.5) and BHadjusted p-value <0.01.
"Archer et al CCR" indicated whether genes where identidied in previously bulk RNA-seq analysis.
order	gene	fix.pv	emp.pv	para.pv	ad.pv	rank	zinf	aic	expv.mean	expv.zero	meanlogFC	BHadjust.pvalue	gene ID	Archer et al CCR
7166	Tb427-100112400	0	0.00990099	0	0.776924	4.98983	FALSE	14672.2	0.799024	0.501178	17.4191	0	Tb427_100112400	TRUE
4722	Tb427-080028700	0	0.00990099	0	0.15319	4.99871	FALSE	17081	0.992858	0.403272	7.74671	0	Tb427_080028700	TRUE
4534	Tb427-080007400	0	0.00990099	0	0.924495	4.96521	FALSE	19358.5	1.27798	0.258508	4.19794	0	Tb427_080007400	FALSE
2122	Tb427-030040300	0	0.00990099	0	0.886169	4.99268	FALSE	21140.7	1.65723	0.148953	2.70114	0	Tb427_030040300	FALSE
3562	Tb427-060036900	0	0.00990099	4.6674e-293	0.958796	4.98921	FALSE	14473.2	0.63726	0.534555	4.81182	9.04636e-290	Tb427_060036900	TRUE
9237	Tb427-110165900	0	0.00990099	6.08019e-267	0.597971	4.9947	FALSE	17613.5	0.992879	0.356283	5.80265	9.82051e-264	Tb427_110165900	TRUE
9411	Tb427-110183600	0	0.00990099	2.59188e-243	0.731428	4.98849	FALSE	12049.5	0.502636	0.621466	23.3127	3.58827e-240	Tb427_110183600	TRUE
4558	Tb427-080009800	0	0.00990099	1.12978e-233	0.946138	4.99874	FALSE	9691.5	0.337542	0.737042	53.9068	1.36859e-230	Tb427_080009800	TRUE
4016	Tb427-070034600	0	0.00990099	3.37386e-224	0.500578	4.9785	FALSE	9277.23	0.323259	0.731806	23.0433	3.6329e-221	Tb427_070034600	FALSE
4390	Tb427-070072300	0	0.00990099	7.86406e-223	0.235229	4.87159	FALSE	12504.7	0.456013	0.621728	4.61686	7.62106e-220	Tb427_070072300	TRUE
1949	Tb427-030020200	0	0.00990099	1.99101e-222	0.611999	4.97214	FALSE	11554.1	0.435894	0.651309	13.3208	1.75408e-219	Tb427_030020200	TRUE
8457	Tb427-110079200	0	0.00990099	2.14766e-219	0.749422	4.93055	FALSE	17834.4	0.98402	0.346859	3.16074	1.73441e-216	Tb427_110079200	FALSE
6203	Tb427-100011900	0	0.00990099	2.40484e-218	0.085939	4.9885	FALSE	13549.7	0.534365	0.583639	8.16891	1.79271e-215	Tb427_100011900	TRUE
3177	Tb427-050041600	0	0.00990099	3.62298e-208	0.601046	4.99633	FALSE	12106.1	0.471761	0.634948	8.5712	2.50788e-205	Tb427_050041600	TRUE
7165	Tb427-100112200	0	0.00990099	2.31544e-207	0.375511	4.94824	FALSE	8548.45	0.275418	0.762827	21.4267	1.49593e-204	Tb427_100112200	FALSE
5154	Tb427-080072900	0	0.00990099	1.36131e-198	0.344629	4.98189	FALSE	16152.5	0.768184	0.43377	2.97042	8.2453e-196	Tb427_080072900	TRUE
9083	Tb427-110150500	0	0.00990099	7.22285e-197	0.967955	4.97946	FALSE	20979.7	1.50021	0.181806	2.17003	4.11745e-194	Tb427_110150500	TRUE
8965	Tb427-110138200	0	0.00990099	1.03045e-194	0.757133	4.99275	FALSE	11202.1	0.392134	0.682592	9.50751	5.54782e-192	Tb427_110138200	TRUE
5582	Tb427-090034500	0	0.00990099	1.04149e-191	0.576528	4.84937	FALSE	20937.6	1.59793	0.133508	1.50352	5.31215e-189	Tb427_090034500	FALSE
7907	Tb427-110023600	0	0.00990099	5.09482e-190	0.834911	4.95888	FALSE	9488.38	0.309688	0.733508	19.7024	2.46869e-187	Tb427_110023600	FALSE
9105	Tb427-110152700	0	0.00990099	8.63834e-189	0.843029	4.99016	FALSE	16657.1	0.829025	0.402487	2.68109	3.98639e-186	Tb427_110152700	TRUE
7019	Tb427-100096800	0	0.00990099	5.23479e-188	0.761815	4.9885	FALSE	9344.49	0.318129	0.733246	50.4303	2.30593e-185	Tb427_100096800	TRUE
2477	Tb427-040021400	0	0.00990099	3.24952e-187	0.355168	4.99564	FALSE	17768.7	0.943972	0.358508	2.37942	1.36918e-184	Tb427_040021400	TRUE
9246	Tb427-110166800	0	0.00990099	2.79072e-184	0.92542	4.98619	FALSE	10495.4	0.363407	0.689005	6.07851	1.12687e-181	Tb427_110166800	TRUE
7243	Tb427-100120400	0	0.00990099	4.09574e-183	0.772531	4.99557	FALSE	15722.4	0.74448	0.465052	5.50968	1.58767e-180	Tb427_100120400	TRUE
1787	Tb427-020032100	0	0.00990099	1.49259e-181	0.248409	4.95956	FALSE	16757.2	0.840998	0.412304	4.4201	5.56336e-179	Tb427_020032100	TRUE
2096	Tb427-030037700	0	0.00990099	3.15768e-179	0.936041	4.87765	FALSE	18232	1.0396	0.309817	2.65875	1.13337e-176	Tb427_030037700	TRUE
4632	Tb427-080019600	0	0.00990099	4.41491e-177	0.777652	4.98678	FALSE	11738.3	0.427775	0.649869	5.30972	1.52803e-174	Tb427_080019600	FALSE
8370	Tb427-110070500	0	0.00990099	2.12296e-176	0.599091	4.99652	FALSE	11044.2	0.37126	0.684424	4.21141	7.09436e-174	Tb427_110070500	TRUE
1831	Tb427-030008400	0	0.00990099	5.77236e-176	0.630995	4.99682	FALSE	10478.5	0.396292	0.684817	76.7404	1.86466e-173	Tb427_030008400	TRUE
7020	Tb427-100096900	0	0.00990099	1.02371e-175	0.761769	4.98903	FALSE	9322.48	0.326858	0.728796	70.7067	3.20026e-173	Tb427_100096900	TRUE
1444	Tb427-010023900	0	0.00990099	3.15743e-170	0.92679	4.99211	FALSE	17586.4	0.937733	0.368586	3.46772	9.56207e-168	Tb427_010023900	TRUE
4901	Tb427-080046800	0	0.00990099	4.47558e-170	0.189307	4.98321	FALSE	19129.3	1.12617	0.292147	1.88147	1.31433e-167	Tb427_080046800	FALSE
7822	Tb427-110015000	0	0.00990099	4.25196e-169	0.285951	4.94805	FALSE	12618.1	0.476633	0.619503	5.07555	1.21193e-166	Tb427_110015000	TRUE
7897	Tb427-110022600	0	0.00990099	4.38569e-169	0.818264	4.91758	FALSE	7767.5	0.2214	0.804058	14.2835	1.21434e-166	Tb427_110022600	FALSE
5788	Tb427-090055600	0	0.00990099	6.41546e-167	0.429998	4.87988	FALSE	11830	0.412291	0.650524	4.881	1.72701e-164	Tb427_090055600	TRUE
2561	Tb427-040029800	0	0.00990099	2.82015e-163	0.723551	4.82279	FALSE	22526.9	2.21237	0.0424084	1.4586	7.3865e-161	Tb427_040029800	FALSE
4356	Tb427-070068800	0	0.00990099	4.53764e-161	0.898834	4.99546	FALSE	10786.4	0.364534	0.701047	9.05217	1.15722e-158	Tb427_070068800	TRUE
7164	Tb427-100112000	0	0.00990099	1.06139e-160	0.90295	4.96612	FALSE	8662.54	0.287544	0.75733	22.2639	2.63742e-158	Tb427_100112000	FALSE
3793	Tb427-070009500	0	0.00990099	1.57177e-160	0.840799	4.99249	FALSE	8829.96	0.260459	0.763351	5.47503	3.808e-158	Tb427_070009500	TRUE
4420	Tb427-070075900	3.19353e-06	0.00990099	1.76735e-160	0.816777	1.00069	FALSE	31059	8.85128	0	1.06468	4.1774e-158	Tb427_070075900	FALSE
3529	Tb427-060033600	0	0.00990099	6.56641e-158	0.533166	4.97789	FALSE	10639.6	0.334443	0.716492	5.06876	1.51512e-155	Tb427_060033600	TRUE
2980	Tb427-050021300	0	0.00990099	2.63719e-157	0.0518478	4.99543	FALSE	10551	0.357271	0.696597	16.713	5.94349e-155	Tb427_050021300	TRUE
1837	Tb427-030009000	0	0.00990099	2.61687e-156	0.95697	4.98153	FALSE	18404	1.03609	0.30733	1.87639	5.76365e-154	Tb427_030009000	TRUE
4212	Tb427-070054200	0	0.00990099	2.97206e-154	0.587292	4.99354	FALSE	8462.03	0.262341	0.776702	51.6805	6.40051e-152	Tb427_070054200	FALSE
4837	Tb427-080040400	0	0.00990099	5.49366e-154	0.0415942	4.99107	FALSE	11358.1	0.392936	0.688089	6.59458	1.15737e-151	Tb427_080040400	TRUE
2796	Tb427-040054500	0	0.00990099	1.33811e-151	0.024936	4.93843	FALSE	8159.16	0.239339	0.785079	8.79367	2.75906e-149	Tb427_040054500	TRUE
7630	Tb427-100161200	0	0.00990099	3.35272e-151	0.705846	4.9349	FALSE	19614	1.25113	0.229058	1.8753	6.76901e-149	Tb427_100161200	TRUE
4422	Tb427-070076200	0	0.00990099	3.3927e-149	0.676662	1.00072	FALSE	25982.8	4.17942	0.00039267	1.1992	6.70993e-147	Tb427_070076200	FALSE
3566	Tb427-060037300	0	0.00990099	9.4942e-149	0.0694186	4.99284	FALSE	9833.66	0.310852	0.739398	14.6597	1.84016e-146	Tb427_060037300	TRUE
3706	Tb427-060051900	0	0.00990099	1.18217e-148	0.835798	4.9933	FALSE	14026.4	0.579861	0.560209	5.28478	2.24636e-146	Tb427_060051900	TRUE
2282	Tb427-030057200	0	0.00990099	1.70508e-147	0.398904	4.99317	FALSE	10638.5	0.353423	0.69712	4.5069	3.17768e-145	Tb427_030057200	TRUE
4905	Tb427-080047200	0	0.00990099	1.20431e-146	0.0797257	4.99155	FALSE	9494.91	0.287848	0.756021	10.4779	2.20207e-144	Tb427_080047200	TRUE
3271	Tb427-050052600	0	0.00990099	3.88374e-140	0.113442	4.97	FALSE	11449.6	0.389197	0.670681	3.66352	6.96988e-138	Tb427_050052600	TRUE
4577	Tb427-080011700	0	0.00990099	9.41104e-140	0.3668	4.93101	FALSE	9320.79	0.286117	0.743717	8.69876	1.65823e-137	Tb427_080011700	TRUE
4275	Tb427-070060500	0	0.00990099	3.78691e-138	0.556005	4.99391	FALSE	8542.4	0.270111	0.773298	41.3874	6.55338e-136	Tb427_070060500	TRUE
4533	Tb427-080007300	0	0.00990099	4.11515e-136	0.540811	4.90377	FALSE	14073.6	0.56705	0.546335	4.33901	6.99648e-134	Tb427_080007300	TRUE
8492	Tb427-110082700	0	0.00990099	2.45768e-135	0.145411	4.96873	FALSE	13603.8	0.534469	0.571859	5.10165	4.10644e-133	Tb427_110082700	TRUE
6912	Tb427-100085500	0	0.00990099	2.6143e-135	0.733017	4.99159	FALSE	14761.4	0.618219	0.539398	4.466	4.2941e-133	Tb427_100085500	TRUE
7018	Tb427-100096700	0	0.00990099	6.13225e-135	0.062608	4.98378	FALSE	8529.05	0.254622	0.778665	15.8103	9.9046e-133	Tb427_100096700	FALSE
5530	Tb427-090029200	0	0.00990099	8.48315e-134	0.552842	4.98934	FALSE	10962	0.378635	0.687435	11.8366	1.34771e-131	Tb427_090029200	TRUE
4867	Tb427-080043400	0	0.00990099	1.21288e-133	0.871247	4.99566	FALSE	10801.3	0.356716	0.707723	8.73429	1.89581e-131	Tb427_080043400	TRUE
7898	Tb427-110022700	0	0.00990099	8.36236e-133	0.0655913	4.94752	FALSE	8192.18	0.245504	0.784293	17.4303	1.28634e-130	Tb427_110022700	FALSE
6747	Tb427-100067700	0	0.00990099	2.00533e-132	0.119815	4.93833	FALSE	9701.03	0.296367	0.73678	4.56117	3.03651e-130	Tb427_100067700	TRUE
6058	Tb427-090085100	0	0.00990099	5.17911e-132	0.189845	4.97136	FALSE	10909.9	0.407475	0.672513	17.1616	7.72166e-130	Tb427_090085100	TRUE
6958	Tb427-100090100	0	0.00990099	5.77211e-128	0.909096	4.97808	FALSE	8196.91	0.254373	0.780628	37.8809	8.47538e-126	Tb427_100090100	TRUE
3898	Tb427-070020200	0	0.00990099	3.13144e-127	0.926078	4.98318	FALSE	7653.48	0.207171	0.81466	17.0992	4.52938e-125	Tb427_070020200	TRUE
6204	Tb427-100012000	0	0.00990099	2.2347e-126	0.833436	4.95029	FALSE	11097	0.361681	0.690183	6.53688	3.18477e-124	Tb427_100012000	TRUE
4535	Tb427-080007500	0	0.00990099	1.36135e-125	0.600708	4.90973	FALSE	21195.4	1.56631	0.144764	1.3871	1.91201e-123	Tb427_080007500	FALSE
9273	Tb427-110169500	0	0.00990099	3.26408e-122	0.424919	4.96896	FALSE	18612.2	1.07511	0.287435	2.10398	4.51889e-120	Tb427_110169500	TRUE
1975	Tb427-030022800	0	0.00990099	1.41544e-119	0.872721	4.96494	FALSE	14006.7	0.559297	0.546466	2.5835	1.93198e-117	Tb427_030022800	TRUE
7103	Tb427-100105200	0	0.00990099	2.04949e-118	0.300936	4.98522	FALSE	10973.2	0.355762	0.698429	5.2852	2.75856e-116	Tb427_100105200	TRUE
4259	Tb427-070058900	0	0.00990099	4.28755e-118	0.505426	4.99612	FALSE	8311.37	0.251784	0.787042	36.936	5.69187e-116	Tb427_070058900	TRUE
2797	Tb427-040054600	0	0.00990099	1.02308e-114	0.661622	4.99158	FALSE	9311.61	0.270806	0.768717	6.50604	1.33982e-112	Tb427_040054600	TRUE
1741	Tb427-020027500	0	0.00990099	7.76739e-112	0.125005	4.97998	FALSE	14435.4	0.586018	0.535733	3.61001	1.00365e-109	Tb427_020027500	TRUE
8217	Tb427-110055200	0	0.00990099	1.21867e-111	0.893559	4.99122	FALSE	8091.6	0.22052	0.80877	12.1785	1.55397e-109	Tb427_110055200	TRUE
3104	Tb427-050034300	0	0.00990099	7.12569e-111	0.31501	4.99015	FALSE	10187.1	0.323711	0.731414	9.26296	8.96819e-109	Tb427_050034300	TRUE
5547	Tb427-090030900	0	0.00990099	1.45311e-110	0.522443	4.99471	FALSE	11439.8	0.395291	0.682984	6.45777	1.8054e-108	Tb427_090030900	TRUE
8045	Tb427-110037600	0	0.00990099	3.30957e-109	0.849804	4.94952	FALSE	18661.3	1.08293	0.29267	1.94131	4.05988e-107	Tb427_110037600	TRUE
2528	Tb427-040026500	0	0.00990099	2.42711e-107	0.368539	4.9932	FALSE	9714.27	0.291003	0.748298	10.1055	2.94014e-105	Tb427_040026500	TRUE
7989	Tb427-110031900	0	0.00990099	6.1638e-106	0.0919276	4.93877	FALSE	6740.7	0.180489	0.834293	11.9211	7.3745e-104	Tb427_110031900	TRUE
2779	Tb427-040052800	0	0.00990099	9.77335e-106	0.823017	4.97114	FALSE	19088.5	1.11913	0.278927	2.12879	1.15504e-103	Tb427_040052800	TRUE
8521	Tb427-110085600	0	0.00990099	3.94386e-104	0.0928982	4.9876	FALSE	14472.7	0.588306	0.53089	3.73889	4.60482e-102	Tb427_110085600	TRUE
8357	Tb427-110069200	0	0.00990099	4.62286e-104	0.792408	4.98329	FALSE	10690.3	0.341349	0.712696	5.42896	5.33334e-102	Tb427_110069200	FALSE
9391	Tb427-110181600	0	0.00990099	1.06345e-103	0.576203	4.97297	FALSE	16452	0.777932	0.431545	2.74693	1.21246e-101	Tb427_110181600	FALSE
7709	Tb427-100170300	0	0.00990099	1.16818e-103	0.808063	4.99186	FALSE	5986.08	0.154372	0.867539	99.3488	1.31637e-101	Tb427_100170300	TRUE
4015	Tb427-070032700	0	0.00990099	1.19691e-103	0.755504	4.91627	FALSE	6893.88	0.188138	0.826832	17.862	1.33325e-101	Tb427_070032700	FALSE
3199	Tb427-050043800	0	0.00990099	1.39225e-103	0.831182	4.98317	FALSE	7342.28	0.190591	0.836126	9.30865	1.53322e-101	Tb427_050043800	TRUE
6340	Tb427-100026100	0	0.00990099	1.07034e-101	0.206457	4.83554	FALSE	13249.7	0.504302	0.584948	4.10313	1.16546e-99	Tb427_100026100	FALSE
5146	Tb427-080072100	0	0.00990099	4.38265e-101	0.608091	4.89368	FALSE	20092.2	1.30103	0.216885	1.66085	4.71914e-99	Tb427_080072100	TRUE
1406	Tb427-010020000	0	0.00990099	4.55042e-101	0.505278	4.97143	FALSE	9805.01	0.297257	0.73233	4.36049	4.84595e-99	Tb427_010020000	TRUE
8833	Tb427-110124600	0	0.00990099	6.61168e-97	0.742188	4.97168	FALSE	14506.9	0.581531	0.547382	2.52918	6.96454e-95	Tb427_110124600	TRUE
1586	Tb427-020011600	0	0.00990099	2.19426e-95	0.853462	4.97146	FALSE	16229.4	0.738926	0.440969	1.98995	2.28651e-93	Tb427_020011600	TRUE
4396	Tb427-070072900	0	0.00990099	8.48173e-95	0.748966	4.99246	FALSE	11874.8	0.3999	0.657984	3.01938	8.7443e-93	Tb427_070072900	FALSE
1459	Tb427-010025700	9.5011e-07	0.00990099	2.41527e-94	0.964606	1.00065	FALSE	28879.1	6.38705	0	1.08482	2.46383e-92	Tb427_010025700	FALSE
1715	Tb427-020024900	0	0.00990099	3.37051e-94	0.874504	4.98763	FALSE	7779.38	0.217844	0.809817	30.3504	3.40246e-92	Tb427_020024900	TRUE
3111	Tb427-050035000	0	0.00990099	4.34131e-94	0.323419	4.93512	FALSE	17316.2	0.871715	0.368194	1.70352	4.33729e-92	Tb427_050035000	FALSE
1930	Tb427-030018300	0	0.00990099	5.59746e-94	0.521119	4.99162	FALSE	9359.01	0.278729	0.762958	11.6863	5.5352e-92	Tb427_030018300	TRUE
49	Tb427-000016000	0	0.00990099	8.32177e-94	0.0816364	1.00119	FALSE	25294.3	3.67943	0	1.17512	8.14609e-92	Tb427_000016000	FALSE
2016	Tb427-030028200	0	0.00990099	1.04205e-93	0.953943	4.9563	FALSE	7998.75	0.203278	0.814398	5.64362	1.00985e-91	Tb427_030028200	TRUE
1934	Tb427-030018700	0	0.00990099	3.05934e-93	0.742595	4.95336	FALSE	13078	0.473965	0.60288	2.19922	2.93545e-91	Tb427_030018700	TRUE
2177	Tb427-030046000	0	0.00990099	5.11484e-93	0.121326	4.98763	FALSE	10565.5	0.341858	0.699084	3.72813	4.8596e-91	Tb427_030046000	FALSE
8490	Tb427-110082500	0	0.00990099	2.12092e-91	0.807814	4.9853	FALSE	13413.4	0.501354	0.584293	2.68634	1.99552e-89	Tb427_110082500	FALSE
1411	Tb427-010020500	0	0.00990099	1.53503e-90	0.579396	4.99308	FALSE	14427.3	0.569991	0.562173	4.09199	1.43038e-88	Tb427_010020500	TRUE
7144	Tb427-100109300	0	0.00990099	1.19351e-89	0.133103	4.85696	FALSE	24637.5	2.65595	0.0349476	1.41873	1.10155e-87	Tb427_100109300	FALSE
9024	Tb427-110144100	0	0.00990099	1.39548e-89	0.977412	4.97121	FALSE	8468.15	0.231053	0.799215	6.12232	1.27581e-87	Tb427_110144100	TRUE
4425	Tb427-070076600	0	0.00990099	7.11697e-89	0.266141	4.96792	FALSE	12999.8	0.469521	0.61466	3.4344	6.44585e-87	Tb427_070076600	TRUE
7808	Tb427-110013600	0	0.00990099	1.10974e-88	0.433243	4.99367	FALSE	11036	0.357274	0.687435	3.88332	9.95785e-87	Tb427_110013600	TRUE
4161	Tb427-070049100	0	0.00990099	1.80762e-88	0.950758	4.9177	FALSE	7470.15	0.186774	0.829843	7.16494	1.60713e-86	Tb427_070049100	FALSE
7557	Tb427-100153200	0	0.00990099	5.26392e-87	0.523089	4.93162	FALSE	16226.7	0.739812	0.441099	2.08784	4.63751e-85	Tb427_100153200	TRUE
4511	Tb427-080005100:pseudogene	0	0.00990099	7.6182e-85	0.563401	4.99721	FALSE	18867.9	0.942112	0.414136	3.53811	6.65117e-83	Tb427_080005100:pseudogene	FALSE
5107	Tb427-080068100	0	0.00990099	9.94108e-85	0.943751	4.98713	FALSE	16472.8	0.780385	0.421728	2.1702	8.6017e-83	Tb427_080068100	TRUE
6249	Tb427-100016600:pseudogene	0	0.00990099	1.51798e-84	0.0925836	4.98998	FALSE	7097.1	0.191386	0.829712	35.5842	1.30183e-82	Tb427_100016600:pseudogene	FALSE
4450	Tb427-070079100	0	0.00990099	1.8512e-84	0.426645	4.97655	FALSE	6880.17	0.173064	0.841754	24.3014	1.57369e-82	Tb427_070079100	TRUE
7352	Tb427-100131800	0	0.00990099	2.79265e-84	0.122208	4.97395	FALSE	6950.41	0.171429	0.845681	7.02762	2.35335e-82	Tb427_100131800	FALSE
9255	Tb427-110167700	0	0.00990099	4.80217e-84	0.558761	4.99296	FALSE	11009.4	0.343917	0.706937	3.63495	4.01189e-82	Tb427_110167700	TRUE
4078	Tb427-070040800	0	0.00990099	1.1887e-83	0.878078	4.67245	FALSE	22790.3	2.35508	0.0293194	1.28707	9.84592e-82	Tb427_070040800	FALSE
2280	Tb427-030057000	0	0.00990099	7.48653e-82	0.483373	4.98448	FALSE	10886.9	0.345035	0.693455	2.84146	6.14847e-80	Tb427_030057000	TRUE
1840	Tb427-030009300	0	0.00990099	1.64763e-81	0.0270987	4.92229	FALSE	6929.97	0.175278	0.837827	15.3588	1.34178e-79	Tb427_030009300	TRUE
3945	Tb427-070025700	0	0.00990099	7.03998e-80	0.631242	4.85333	FALSE	9925.85	0.303377	0.733508	6.87645	5.68537e-78	Tb427_070025700	TRUE
7397	Tb427-100136400	0	0.00990099	9.56151e-80	0.421494	4.79416	FALSE	9336.07	0.273022	0.751178	5.45865	7.6579e-78	Tb427_100136400	TRUE
8335	Tb427-110067000	0	0.00990099	1.73955e-79	0.768175	4.8235	FALSE	17188.7	0.856704	0.376702	2.24502	1.3818e-77	Tb427_110067000	FALSE
1553	Tb427-020008100	0	0.00990099	2.49176e-79	0.688199	4.89267	FALSE	19103.9	1.12048	0.273822	1.72549	1.96322e-77	Tb427_020008100	FALSE
7321	Tb427-100128700	0	0.00990099	4.22059e-78	0.370251	4.98461	FALSE	6632.79	0.159319	0.857723	7.23905	3.29853e-76	Tb427_100128700	TRUE
4643	Tb427-080020700	0	0.00990099	9.89449e-78	0.901474	4.78724	FALSE	20698.2	1.50518	0.146597	1.46716	7.671e-76	Tb427_080020700	FALSE
7001	Tb427-100095000	0	0.00990099	1.70397e-76	0.68846	4.97141	FALSE	12169.6	0.413669	0.653403	3.57562	1.31057e-74	Tb427_100095000	TRUE
4840	Tb427-080040700	0	0.00990099	1.62967e-75	0.519483	4.96896	FALSE	14581.7	0.585285	0.539529	3.60457	1.24356e-73	Tb427_080040700	TRUE
7851	Tb427-110017900	0	0.00990099	2.38923e-75	0.895394	4.97176	FALSE	9657.51	0.289906	0.748298	10.2453	1.80891e-73	Tb427_110017900	TRUE
9343	Tb427-110176500	0	0.00990099	3.97516e-75	0.930312	4.81435	FALSE	8075.9	0.211677	0.805366	5.5949	2.9863e-73	Tb427_110176500	TRUE
3973	Tb427-070028500	0	0.00990099	5.63723e-75	0.903977	4.9799	FALSE	13407.5	0.489109	0.606152	3.03082	4.20234e-73	Tb427_070028500	TRUE
6199	Tb427-100011500	0	0.00990099	1.10854e-74	0.611472	4.84824	FALSE	8828.89	0.240741	0.777749	3.16697	8.20069e-73	Tb427_100011500	TRUE
2240	Tb427-030053000	0	0.00990099	1.1428e-74	0.543883	4.9659	FALSE	9351.97	0.269168	0.760602	6.24527	8.39005e-73	Tb427_030053000	TRUE
9356	Tb427-110178000	0	0.00990099	2.06693e-74	0.133515	4.64128	FALSE	18152.6	0.97847	0.32199	1.81711	1.50606e-72	Tb427_110178000	FALSE
6484	Tb427-100041000	0	0.00990099	2.18145e-74	0.461067	4.81856	FALSE	15771.2	0.689808	0.468194	2.12399	1.57764e-72	Tb427_100041000	FALSE
8767	Tb427-110111500	0	0.00990099	4.13167e-74	0.00913973	4.93428	FALSE	11524.1	0.372402	0.678403	3.4765	2.96593e-72	Tb427_110111500	TRUE
8802	Tb427-110121500	0	0.00990099	9.95065e-74	0.395717	4.99004	FALSE	11966.4	0.412283	0.659686	3.97601	7.09057e-72	Tb427_110121500	FALSE
4980	Tb427-080055400	0	0.00990099	2.12021e-73	0.120363	4.94937	FALSE	6362.46	0.154558	0.852094	6.67786	1.49977e-71	Tb427_080055400	FALSE
3653	Tb427-060046000	0	0.00990099	2.48079e-73	0.654781	4.98511	FALSE	12287.2	0.422311	0.652749	3.67801	1.74213e-71	Tb427_060046000	TRUE
9247	Tb427-110166900	0	0.00990099	6.28398e-73	0.69594	4.89412	FALSE	7618.62	0.190434	0.820942	3.6833	4.38116e-71	Tb427_110166900	FALSE
8137	Tb427-110047000	0	0.00990099	3.28924e-72	0.259865	4.9792	FALSE	8679.7	0.244061	0.779581	11.7402	2.27686e-70	Tb427_110047000	TRUE
6438	Tb427-100036400	0	0.00990099	6.47277e-72	0.422405	4.98622	FALSE	9576.02	0.276541	0.760864	4.55508	4.44877e-70	Tb427_100036400	TRUE
3254	Tb427-050050900	0	0.00990099	9.94075e-72	0.204972	4.97508	FALSE	6814.46	0.167222	0.846859	15.0513	6.78421e-70	Tb427_050050900	FALSE
1408	Tb427-010020200	0	0.00990099	1.17454e-71	0.903669	4.81214	FALSE	15216.1	0.640839	0.498168	2.20244	7.95978e-70	Tb427_010020200	TRUE
8806	Tb427-110121900	0	0.00990099	1.68187e-71	0.59751	4.96616	FALSE	14513.3	0.57146	0.549738	2.65205	1.13187e-69	Tb427_110121900	TRUE
2755	Tb427-040050400	0	0.00990099	3.13905e-71	0.653598	4.94407	FALSE	10448.1	0.318217	0.716623	3.1551	2.09797e-69	Tb427_040050400	TRUE
5090	Tb427-080066400	0	0.00990099	1.33297e-70	0.577596	4.96583	FALSE	10144.5	0.307672	0.731675	5.1915	8.84785e-69	Tb427_080066400	TRUE
5816	Tb427-090058400	0	0.00990099	4.87905e-70	0.992909	4.83546	FALSE	19016.4	1.11672	0.266099	1.54519	3.21652e-68	Tb427_090058400	FALSE
5367	Tb427-090011700	0	0.00990099	1.05578e-69	0.809832	4.97509	FALSE	5817.11	0.140378	0.871204	41.771	6.91322e-68	Tb427_090011700	FALSE
1391	Tb427-010017400	0	0.00990099	1.94814e-69	0.550676	1.46019	FALSE	23680.8	2.97188	0.00484293	1.15688	1.26708e-67	Tb427_010017400	FALSE
1488	Tb427-010029100	0	0.00990099	2.21742e-69	0.88291	4.46319	FALSE	20587.5	1.40116	0.193194	1.55225	1.4326e-67	Tb427_010029100	TRUE
4056	Tb427-070038600	0	0.00990099	3.11864e-69	0.324065	4.89866	FALSE	17864.1	0.91253	0.365838	1.87082	2.00151e-67	Tb427_070038600	TRUE
8971	Tb427-110138800	0	0.00990099	8.52515e-69	0.684454	4.96426	FALSE	14311.8	0.563511	0.543063	2.12308	5.43534e-67	Tb427_110138800	TRUE
8579	Tb427-110091400	0	0.00990099	1.20756e-68	0.928344	4.87501	FALSE	10451.6	0.316788	0.718455	2.65885	7.6487e-67	Tb427_110091400	FALSE
7558	Tb427-100153300	0	0.00990099	2.89663e-67	0.236421	4.95889	FALSE	11885.1	0.398469	0.65288	2.6652	1.82281e-65	Tb427_100153300	TRUE
7133	Tb427-100108200	0	0.00990099	3.23754e-67	0.106265	4.94821	FALSE	7031.11	0.167689	0.851309	4.94434	2.02419e-65	Tb427_100108200	TRUE
7814	Tb427-110014200	0	0.00990099	4.95722e-67	0.967005	4.98564	FALSE	9904.78	0.289767	0.750785	3.57679	3.07951e-65	Tb427_110014200	TRUE
3627	Tb427-060043400	0	0.00990099	7.10914e-67	0.496914	4.25878	FALSE	21317.8	1.67982	0.113482	1.38109	4.3882e-65	Tb427_060043400	FALSE
6830	Tb427-100077200	0	0.00990099	1.01372e-66	0.862475	4.78665	FALSE	13644.4	0.504255	0.584031	2.27431	6.21767e-65	Tb427_100077200	TRUE
9194	Tb427-110161600	0	0.00990099	1.12236e-66	0.728816	4.9243	FALSE	7542.3	0.193833	0.817016	4.48732	6.84073e-65	Tb427_110161600	TRUE
7008	Tb427-100095700	0	0.00990099	1.13371e-66	0.0298868	4.87068	FALSE	12602.1	0.437483	0.633901	3.45557	6.86675e-65	Tb427_100095700	FALSE
4556	Tb427-080009600	0	0.00990099	1.50659e-66	0.0713327	4.98883	FALSE	3291.33	0.0652106	0.939529	219.449	9.06855e-65	Tb427_080009600	FALSE
8216	Tb427-110055100	0	0.00990099	1.94383e-66	0.265845	4.94217	FALSE	15290	0.648123	0.491361	1.91042	1.16282e-64	Tb427_110055100	FALSE
4785	Tb427-080035100	0	0.00990099	2.73184e-65	0.513087	4.97938	FALSE	11527	0.371977	0.683639	3.22649	1.62419e-63	Tb427_080035100	TRUE
2858	Tb427-050008600	0	0.00990099	3.50009e-65	0.497234	4.95299	FALSE	21187.4	1.49624	0.17212	1.42894	2.06825e-63	Tb427_050008600	FALSE
183	Tb427-000198100:pseudogene	0	0.00990099	3.52919e-65	0.776282	4.80487	FALSE	7045.52	0.177391	0.833377	8.86408	2.07281e-63	Tb427_000198100:pseudogene	FALSE
6896	Tb427-100083900	0	0.00990099	4.85862e-65	0.220638	4.95216	FALSE	8446.69	0.22387	0.800654	5.1	2.83644e-63	Tb427_100083900	TRUE
5463	Tb427-090022100	0	0.00990099	2.51637e-64	0.554308	4.7256	FALSE	10744.6	0.332288	0.704974	2.92437	1.46025e-62	Tb427_090022100	FALSE
4617	Tb427-080017800	0	0.00990099	4.61611e-64	0.990241	4.92104	FALSE	16306.3	0.752207	0.430628	1.94432	2.66278e-62	Tb427_080017800	TRUE
4350	Tb427-070068200	0	0.00990099	4.76686e-64	0.83291	4.83616	FALSE	6394.44	0.150152	0.857853	8.56572	2.73347e-62	Tb427_070068200	FALSE
8688	Tb427-110103400	0	0.00990099	6.83971e-64	0.870189	4.9872	FALSE	5901.48	0.139028	0.871204	36.9651	3.89904e-62	Tb427_110103400	TRUE
2903	Tb427-050013300	0	0.00990099	8.08208e-63	0.5614	4.74301	FALSE	11227.5	0.360595	0.685733	3.60478	4.58032e-61	Tb427_050013300	TRUE
7400	Tb427-100136700	0	0.00990099	9.48606e-63	0.355229	4.97241	FALSE	9087.11	0.252633	0.776178	4.61157	5.34473e-61	Tb427_100136700	TRUE
3172	Tb427-050041100	0	0.00990099	1.27128e-62	0.771252	4.97948	FALSE	6172.12	0.150436	0.860079	37.7032	7.12139e-61	Tb427_050041100	TRUE
3880	Tb427-070018400	0	0.00990099	1.48482e-62	0.88922	4.97301	FALSE	10304.7	0.311392	0.731675	4.19286	8.26975e-61	Tb427_070018400	TRUE
2659	Tb427-040040200	0	0.00990099	1.60263e-62	0.852177	4.66183	FALSE	16524.5	0.762535	0.42644	1.64623	8.87492e-61	Tb427_040040200	FALSE
6093	Tb427-090088700	0	0.00990099	3.16041e-62	0.603733	4.9569	FALSE	6842.4	0.169443	0.844241	15.301	1.7402e-60	Tb427_090088700	TRUE
2245	Tb427-030053500	0	0.00990099	1.76616e-61	0.701114	4.93649	FALSE	10862.9	0.334908	0.699869	2.17534	9.66998e-60	Tb427_030053500	FALSE
5724	Tb427-090049200	0	0.00990099	1.78767e-61	0.742369	4.98033	FALSE	8970.5	0.249204	0.782984	4.36228	9.73275e-60	Tb427_090049200	TRUE
7832	Tb427-110016000	0	0.00990099	3.99416e-61	0.931744	4.81004	FALSE	10557.2	0.31653	0.718848	2.15342	2.16242e-59	Tb427_110016000	FALSE
7016	Tb427-100096500	0	0.00990099	7.47804e-61	0.0855172	4.89962	FALSE	6303.78	0.14952	0.860733	12.7873	4.02609e-59	Tb427_100096500	FALSE
8403	Tb427-110073800	0	0.00990099	1.09578e-60	0.557693	4.94085	FALSE	18860.9	1.0668	0.284948	1.57827	5.86698e-59	Tb427_110073800	FALSE
3121	Tb427-050036000	0	0.00990099	1.124e-60	0.917029	4.70545	FALSE	9522.51	0.268564	0.752225	2.27872	5.98499e-59	Tb427_050036000	TRUE
5186	Tb427-080076100	0	0.00990099	1.2646e-60	0.558668	4.79401	FALSE	9879.91	0.285775	0.744503	3.90065	6.69683e-59	Tb427_080076100	TRUE
3377	Tb427-060015700	0	0.00990099	1.97257e-60	0.2983	4.94763	FALSE	7383.45	0.183387	0.825524	3.85499	1.03892e-58	Tb427_060015700	FALSE
1497	Tb427-010030000	0	0.00990099	4.24345e-60	0.329898	4.984	FALSE	9717.04	0.281701	0.754188	6.24629	2.22288e-58	Tb427_010030000	TRUE
5326	Tb427-090006600	0	0.00990099	4.57597e-60	0.994978	4.9526	FALSE	10222.1	0.300421	0.743848	3.55084	2.38418e-58	Tb427_090006600	TRUE
3378	Tb427-060015800	0	0.00990099	5.45076e-60	0.273837	4.95605	FALSE	9598.6	0.278514	0.755497	6.2022	2.82478e-58	Tb427_060015800	TRUE
9445	Tb427-110187000	0	0.00990099	1.5723e-59	0.693592	4.81183	FALSE	11161.3	0.354523	0.689529	2.77791	8.10487e-58	Tb427_110187000	FALSE
8046	Tb427-110037700	0	0.00990099	3.55464e-59	0.581898	4.97811	FALSE	9364.5	0.269691	0.768586	5.47317	1.82265e-57	Tb427_110037700	TRUE
2495	Tb427-040023200	0	0.00990099	3.60817e-59	0.43827	4.46888	FALSE	16766.8	0.798591	0.394372	1.59807	1.84036e-57	Tb427_040023200	FALSE
4211	Tb427-070054100	0	0.00990099	3.79295e-59	0.320228	4.8754	FALSE	5535.63	0.122639	0.882723	5.02879	1.92448e-57	Tb427_070054100	FALSE
5906	Tb427-090068200	0	0.00990099	5.64624e-59	0.285505	4.94203	FALSE	9107.36	0.251284	0.778272	3.98952	2.84988e-57	Tb427_090068200	TRUE
1432	Tb427-010022700	0	0.00990099	8.18258e-59	0.948237	4.90413	FALSE	12929.3	0.452038	0.622906	2.44285	4.10867e-57	Tb427_010022700	TRUE
8992	Tb427-110140900	0	0.00990099	1.46939e-58	0.804273	4.89944	FALSE	10507.2	0.317726	0.715445	2.57653	7.34016e-57	Tb427_110140900	FALSE
6202	Tb427-100011800	0	0.00990099	2.88911e-58	0.919736	4.94453	FALSE	10146	0.305594	0.728141	3.61974	1.43581e-56	Tb427_100011800	TRUE
4784	Tb427-080035000	0	0.00990099	4.33657e-58	0.919551	4.96605	FALSE	8676.15	0.235223	0.78678	5.59873	2.14417e-56	Tb427_080035000	TRUE
4977	Tb427-080054800	0	0.00990099	7.37751e-58	0.959062	4.76253	FALSE	10934.8	0.338688	0.696204	2.31928	3.62921e-56	Tb427_080054800	TRUE
3534	Tb427-060034100	0	0.00990099	1.02422e-57	0.996349	4.95463	FALSE	9917.03	0.288312	0.744895	3.79752	5.013e-56	Tb427_060034100	TRUE
8280	Tb427-110061500	0	0.00990099	1.07085e-57	0.76698	4.96963	FALSE	7379.44	0.192938	0.825524	14.6804	5.21488e-56	Tb427_110061500	TRUE
4361	Tb427-070069300	0	0.00990099	1.16066e-57	0.803047	4.8803	FALSE	10635.8	0.326517	0.711649	2.53766	5.62396e-56	Tb427_070069300	FALSE
2940	Tb427-050017000	0	0.00990099	1.28076e-57	0.193888	4.79207	FALSE	15848.4	0.690142	0.473429	1.87464	6.17506e-56	Tb427_050017000	FALSE
7012	Tb427-100096100	0	0.00990099	1.61279e-57	0.887523	4.95832	FALSE	12995.8	0.467885	0.608508	2.68458	7.7374e-56	Tb427_100096100	TRUE
1844	Tb427-030009700	0	0.00990099	1.9248e-57	0.653187	4.94947	FALSE	9924.36	0.292392	0.741885	5.2207	9.18878e-56	Tb427_030009700	TRUE
8997	Tb427-110141400	0	0.00990099	3.83106e-57	0.287415	4.98392	FALSE	6191.44	0.142802	0.867277	11.8578	1.81994e-55	Tb427_110141400	FALSE
5660	Tb427-090042800	0	0.00990099	1.11559e-56	0.795013	4.97076	FALSE	11474.5	0.374698	0.67055	2.76538	5.27375e-55	Tb427_090042800	TRUE
3105	Tb427-050034400	0	0.00990099	1.14758e-56	0.734605	4.93425	FALSE	9672.19	0.278232	0.755105	4.47174	5.39866e-55	Tb427_050034400	TRUE
8184	Tb427-110051800	0	0.00990099	2.12098e-56	0.754147	4.94969	FALSE	8808.79	0.241804	0.781414	6.34872	9.92967e-55	Tb427_110051800	TRUE
8832	Tb427-110124500	0	0.00990099	2.70225e-56	0.818902	4.92699	FALSE	8375.81	0.219179	0.804712	4.04811	1.25299e-54	Tb427_110124500	TRUE
6715	Tb427-100064300	0	0.00990099	2.69739e-56	0.587563	4.96514	FALSE	9953.29	0.2939	0.746073	4.01452	1.25299e-54	Tb427_100064300	TRUE
6613	Tb427-100054000	0	0.00990099	6.12154e-56	0.982486	4.77759	FALSE	7642.26	0.193818	0.81623	5.04166	2.82494e-54	Tb427_100054000	TRUE
8563	Tb427-110089800	0	0.00990099	8.32683e-56	0.686759	4.96168	FALSE	9310.73	0.258358	0.768848	3.73667	3.82442e-54	Tb427_110089800	TRUE
8841	Tb427-110125400	0	0.00990099	1.54943e-55	0.329775	4.92397	FALSE	15670	0.687288	0.463743	1.94323	7.0828e-54	Tb427_110125400	TRUE
6621	Tb427-100054800:pseudogene	0	0.00990099	1.5885e-55	0.98459	4.93059	FALSE	9636	0.281239	0.755236	6.25344	7.2273e-54	Tb427_100054800:pseudogene	FALSE
2413	Tb427-040015000	0	0.00990099	1.75296e-55	0.169716	4.97254	FALSE	17619.7	0.890992	0.364398	2.02558	7.93827e-54	Tb427_040015000	FALSE
4243	Tb427-070057300	0	0.00990099	2.18403e-55	0.888018	4.68129	FALSE	11750.8	0.385486	0.666361	3.13463	9.8444e-54	Tb427_070057300	FALSE
2894	Tb427-050012400	0	0.00990099	3.42101e-55	0.413728	4.9434	FALSE	15917.2	0.681723	0.481675	1.98466	1.53486e-53	Tb427_050012400	TRUE
8641	Tb427-110098700	0	0.00990099	9.39216e-55	0.470135	4.92063	FALSE	11197.8	0.361199	0.68678	2.75277	4.19444e-53	Tb427_110098700	TRUE
4293	Tb427-070062300	0	0.00990099	2.02632e-54	0.417588	4.97908	FALSE	5779.96	0.129874	0.88089	10.0128	9.00783e-53	Tb427_070062300	TRUE
5831	Tb427-090059900	0	0.00990099	3.36897e-54	0.733523	4.92525	FALSE	9259.94	0.252702	0.776832	2.60839	1.49081e-52	Tb427_090059900	FALSE
3194	Tb427-050043300	0	0.00990099	6.05417e-54	0.750626	4.6724	FALSE	4916.14	0.104791	0.897775	9.4057	2.66686e-52	Tb427_050043300	TRUE
6950	Tb427-100089300	0	0.00990099	6.38491e-54	0.0548042	4.57933	FALSE	10075.1	0.291787	0.739398	2.94776	2.79983e-52	Tb427_100089300	FALSE
9059	Tb427-110147900	0	0.00990099	7.27008e-54	0.864442	4.85903	FALSE	6173.1	0.141558	0.865838	5.10704	3.17362e-52	Tb427_110147900	TRUE
2265	Tb427-030055500	0	0.00990099	1.72508e-53	0.480084	4.93511	FALSE	7272.79	0.182841	0.832461	12.402	7.49676e-52	Tb427_030055500	TRUE
5823	Tb427-090059100	0	0.00990099	2.30727e-53	0.433137	4.93016	FALSE	9737.98	0.275083	0.756545	2.94248	9.98205e-52	Tb427_090059100	TRUE
9028	Tb427-110144500	0	0.00990099	7.60975e-53	0.141506	4.97073	FALSE	4714.99	0.0993988	0.906806	16.1116	3.2776e-51	Tb427_110144500	FALSE
5338	Tb427-090007800	0	0.00990099	2.50876e-52	0.927907	4.97439	FALSE	5014.74	0.109064	0.898691	28.1688	1.07577e-50	Tb427_090007800	TRUE
6341	Tb427-100026200	0	0.00990099	4.35362e-52	0.747285	4.9693	FALSE	9817.87	0.282105	0.751047	3.605	1.85863e-50	Tb427_100026200	TRUE
1992	Tb427-030024500	0	0.00990099	5.16715e-52	0.0882553	4.39116	FALSE	15047.6	0.611629	0.517801	1.82126	2.19627e-50	Tb427_030024500	FALSE
676	Tb427-000667900	0	0.00990099	1.83927e-51	0.658788	1.00083	FALSE	23686.3	2.84967	0.0091623	1.15871	7.78357e-50	Tb427_000667900	FALSE
8722	Tb427-110107000	0	0.00990099	1.86516e-51	0.401241	4.76	FALSE	18550.1	1.02934	0.297251	1.43332	7.85879e-50	Tb427_110107000	FALSE
2898	Tb427-050012800	0	0.00990099	2.09231e-51	0.631107	3.44191	FALSE	22580.6	2.20678	0.0413613	1.16247	8.77776e-50	Tb427_050012800	FALSE
6252	Tb427-100016900	0	0.00990099	2.27698e-51	0.194506	4.698	FALSE	16426.4	0.748262	0.436518	2.07288	9.51128e-50	Tb427_100016900	FALSE
8249	Tb427-110058400	0	0.00990099	4.06244e-51	0.940139	4.79102	FALSE	6192.37	0.143173	0.865183	8.46953	1.68966e-49	Tb427_110058400	TRUE
6305	Tb427-100022200	0	0.00990099	7.69559e-51	0.957631	4.90002	FALSE	5868.15	0.131901	0.876178	9.40698	3.18709e-49	Tb427_100022200	TRUE
6032	Tb427-090082500	0	0.00990099	1.55614e-50	0.42669	4.65532	FALSE	17094.1	0.826279	0.393455	1.8322	6.41724e-49	Tb427_090082500	FALSE
4217	Tb427-070054700	0	0.00990099	1.94823e-50	0.625119	4.92216	FALSE	16543.4	0.76463	0.420812	1.62929	8.00013e-49	Tb427_070054700	TRUE
2571	Tb427-040030800	0	0.00990099	2.04302e-50	0.25523	4.95122	FALSE	11644.8	0.37527	0.676963	2.28447	8.35398e-49	Tb427_040030800	FALSE
5933	Tb427-090070900	0	0.00990099	8.61573e-50	0.239201	4.93124	FALSE	8246.59	0.212499	0.809817	3.23706	3.50819e-48	Tb427_090070900	TRUE
7015	Tb427-100096400	0.00129088	0.00990099	3.47438e-49	0.984335	3.29701	FALSE	25327.6	3.91557	0.00091623	1.08034	1.40879e-47	Tb427_100096400	FALSE
7746	Tb427-110007300	0	0.00990099	3.58266e-49	0.682907	4.94814	FALSE	7133.44	0.172899	0.839398	8.14692	1.44665e-47	Tb427_110007300	TRUE
9248	Tb427-110167000	0	0.00990099	6.80525e-49	0.979697	4.96507	FALSE	4739.18	0.0961121	0.911257	8.76637	2.7365e-47	Tb427_110167000	TRUE
6105	Tb427-090089900	0	0.00990099	8.35587e-49	0.772489	4.96789	FALSE	10871.1	0.335342	0.71178	3.79889	3.34615e-47	Tb427_090089900	TRUE
9242	Tb427-110166400	0	0.00990099	9.30997e-49	0.364233	4.95287	FALSE	5791.33	0.129443	0.879058	13.5078	3.71288e-47	Tb427_110166400	TRUE
7904	Tb427-110023300	0	0.00990099	1.06528e-48	0.986148	4.8658	FALSE	7569.13	0.187495	0.826178	3.13897	4.23098e-47	Tb427_110023300	FALSE
4354	Tb427-070068600	0	0.00990099	1.52366e-48	0.177168	4.97124	FALSE	11352.9	0.362947	0.67788	2.17271	6.02685e-47	Tb427_070068600	FALSE
7585	Tb427-100156000	0	0.00990099	1.54923e-48	0.0211775	4.41556	FALSE	15736.7	0.679261	0.470026	1.77073	6.10308e-47	Tb427_100156000	FALSE
1453	Tb427-010024800	0	0.00990099	4.69275e-48	0.0620691	4.92359	FALSE	8189.23	0.215003	0.801571	6.60297	1.84119e-46	Tb427_010024800	TRUE
8564	Tb427-110089900	0	0.00990099	7.71603e-48	0.731922	4.75056	FALSE	8187.34	0.212552	0.800131	2.82848	3.01516e-46	Tb427_110089900	TRUE
5952	Tb427-090073100	0	0.00990099	1.49885e-47	0.920255	4.51542	FALSE	20763.8	1.49171	0.145026	1.2422	5.83346e-46	Tb427_090073100	FALSE
3548	Tb427-060035500	0	0.00990099	1.75886e-47	0.807357	4.9279	FALSE	8280.73	0.213425	0.807592	3.77576	6.81804e-46	Tb427_060035500	TRUE
6574	Tb427-100050100:pseudogene	0	0.00990099	2.01984e-47	0.508332	4.95641	FALSE	8108.2	0.207429	0.811126	4.22181	7.79851e-46	Tb427_100050100:pseudogene	FALSE
7826	Tb427-110015400	0	0.00990099	4.51888e-47	0.637501	4.74517	FALSE	13932	0.518483	0.566885	1.38869	1.73779e-45	Tb427_110015400	FALSE
5196	Tb427-080077100	0	0.00990099	4.63823e-47	0.538062	4.88557	FALSE	11148.4	0.352698	0.693586	4.02597	1.77664e-45	Tb427_080077100	FALSE
8892	Tb427-110130800	0	0.00990099	1.33817e-46	0.340393	4.78278	FALSE	11028.4	0.341582	0.700654	2.95676	5.10561e-45	Tb427_110130800	FALSE
6103	Tb427-090089700	0	0.00990099	1.43389e-46	0.850403	4.93641	FALSE	11457.1	0.365521	0.686911	3.65866	5.44934e-45	Tb427_090089700	FALSE
4183	Tb427-070051300	0	0.00990099	1.66228e-46	0.164754	4.96874	FALSE	7668.78	0.192227	0.825654	7.33039	6.29264e-45	Tb427_070051300	TRUE
6512	Tb427-100043800	0	0.00990099	2.88651e-46	0.63025	4.90996	FALSE	10284.4	0.302478	0.726963	2.38248	1.08845e-44	Tb427_100043800	TRUE
7839	Tb427-110016700	0	0.00990099	1.07417e-45	0.290131	4.98925	FALSE	6577.12	0.154401	0.859031	4.58255	4.03481e-44	Tb427_110016700	TRUE
3739	Tb427-060055700	0	0.00990099	1.7025e-45	0.542714	1.53566	FALSE	21240.1	1.61736	0.126178	1.26405	6.37024e-44	Tb427_060055700	FALSE
6200	Tb427-100011600	0	0.00990099	2.21853e-45	0.444639	4.94149	FALSE	15262.8	0.625272	0.518063	2.08259	8.26913e-44	Tb427_100011600	FALSE
5903	Tb427-090067900	0	0.00990099	2.61493e-45	0.778946	4.6553	FALSE	7506.98	0.189072	0.821859	4.82903	9.70929e-44	Tb427_090067900	FALSE
7374	Tb427-100134100	0	0.00990099	3.1022e-45	0.619323	4.95549	FALSE	10092	0.296789	0.732723	2.99203	1.14746e-43	Tb427_100134100	TRUE
6462	Tb427-100038800	0	0.00990099	3.2709e-45	0.0195435	4.83871	FALSE	13741.3	0.512416	0.57788	1.96157	1.20526e-43	Tb427_100038800	FALSE
6768	Tb427-100069800	0	0.00990099	6.20496e-45	0.737803	4.74847	FALSE	6494.01	0.15471	0.85288	7.76318	2.27774e-43	Tb427_100069800	TRUE
4257	Tb427-070058700	0	0.00990099	3.48235e-44	0.141339	4.93396	FALSE	6183.98	0.139142	0.87212	4.30926	1.27349e-42	Tb427_070058700	FALSE
2901	Tb427-050013100	0	0.00990099	6.43258e-44	0.523877	4.93788	FALSE	7966.06	0.203155	0.818063	4.25345	2.34354e-42	Tb427_050013100	TRUE
3963	Tb427-070027500	0	0.00990099	1.90144e-43	0.901442	4.98636	FALSE	5936.49	0.132543	0.873822	3.93461	6.90143e-42	Tb427_070027500	TRUE
4391	Tb427-070072400	0	0.00990099	2.86481e-43	0.554292	4.85636	FALSE	14048	0.533129	0.561126	1.76328	1.03593e-41	Tb427_070072400	FALSE
6844	Tb427-100078600	0	0.00990099	3.29613e-43	0.843204	4.93691	FALSE	6331.7	0.145173	0.867801	5.84787	1.18747e-41	Tb427_100078600	TRUE
5793	Tb427-090056100	0	0.00990099	1.2015e-42	0.527772	4.70301	FALSE	13294.7	0.483096	0.592277	1.91723	4.31249e-41	Tb427_090056100	FALSE
3807	Tb427-070010900	0	0.00990099	1.48946e-42	0.203114	4.93527	FALSE	7419.5	0.187845	0.826702	10.8537	5.32633e-41	Tb427_070010900	TRUE
2814	Tb427-040056500	0	0.00990099	1.74816e-42	0.818369	4.77	FALSE	9611.06	0.275729	0.750262	3.52272	6.22847e-41	Tb427_040056500	TRUE
3616	Tb427-060042300	0	0.00990099	2.15235e-42	0.766876	4.6831	FALSE	21238.4	1.6786	0.10144	1.27502	7.64045e-41	Tb427_060042300	FALSE
2116	Tb427-030039700	0	0.00990099	3.02423e-42	0.788031	4.41748	FALSE	17420.8	0.861053	0.375262	1.52643	1.06963e-40	Tb427_030039700	FALSE
4003	Tb427-070031500	0	0.00990099	3.17642e-42	0.958354	4.44949	FALSE	19308.4	1.17341	0.23534	1.31741	1.11937e-40	Tb427_070031500	FALSE
6062	Tb427-090085500	0	0.00990099	3.45972e-42	0.497046	4.97292	FALSE	9681.41	0.276817	0.754581	4.04258	1.21479e-40	Tb427_090085500	TRUE
5715	Tb427-090048300	0	0.00990099	3.54516e-42	0.447858	4.90696	FALSE	7899.18	0.201117	0.815052	4.8584	1.24029e-40	Tb427_090048300	TRUE
1685	Tb427-020021800	0	0.00990099	4.91616e-42	0.347419	4.51546	FALSE	17428.5	0.861705	0.37644	1.49924	1.71376e-40	Tb427_020021800	FALSE
5195	Tb427-080077000	0	0.00990099	6.10863e-42	0.950966	4.91873	FALSE	6695.32	0.160022	0.850393	9.80617	2.12182e-40	Tb427_080077000	TRUE
6516	Tb427-100044200	0	0.00990099	9.39968e-42	0.883328	4.90872	FALSE	12202.3	0.406134	0.652618	2.15177	3.2533e-40	Tb427_100044200	FALSE
3808	Tb427-070011000	0	0.00990099	9.93757e-42	0.312845	4.5136	FALSE	12832.7	0.445833	0.617539	1.68054	3.42722e-40	Tb427_070011000	FALSE
5991	Tb427-090078400	0	0.00990099	1.06416e-41	0.83897	4.77611	FALSE	5326.45	0.114045	0.88822	8.64238	3.65702e-40	Tb427_090078400	TRUE
3591	Tb427-060039800	0	0.00990099	1.35514e-41	0.875632	3.80638	FALSE	23137.6	2.43363	0.0294503	1.19832	4.64051e-40	Tb427_060039800	FALSE
3804	Tb427-070010600	0	0.00990099	2.43322e-41	0.216615	4.91873	FALSE	5168.99	0.10646	0.900916	5.53045	8.30292e-40	Tb427_070010600	TRUE
3721	Tb427-060053400	0	0.00990099	2.58406e-41	0.644444	4.77863	FALSE	8854.38	0.237073	0.777749	2.23949	8.78671e-40	Tb427_060053400	TRUE
5457	Tb427-090021500	0	0.00990099	2.69723e-41	0.698393	4.95232	FALSE	7176.52	0.173664	0.84411	5.90036	9.13946e-40	Tb427_090021500	FALSE
2702	Tb427-040044500	0	0.00990099	2.99295e-41	0.0900351	4.95714	FALSE	5038.02	0.107698	0.899084	15.0462	1.01061e-39	Tb427_040044500	TRUE
2019	Tb427-030028500	0	0.00990099	3.72266e-41	0.461385	4.95165	FALSE	6582.88	0.15366	0.858246	8.02009	1.24627e-39	Tb427_030028500	TRUE
8371	Tb427-110070600	0	0.00990099	3.72942e-41	0.848381	4.88378	FALSE	5803.89	0.129557	0.873298	4.02011	1.24627e-39	Tb427_110070600	TRUE
2070	Tb427-030033600	0	0.00990099	3.72387e-41	0.539135	4.86221	FALSE	14326.5	0.554304	0.546859	1.66668	1.24627e-39	Tb427_030033600	FALSE
6411	Tb427-100033200	0	0.00990099	4.80233e-41	0.699408	4.47938	FALSE	14129.7	0.539381	0.557592	2.06807	1.59929e-39	Tb427_100033200	FALSE
9187	Tb427-110160900	0	0.00990099	5.17074e-41	0.964216	4.143	FALSE	16040.7	0.712227	0.449869	1.76483	1.71608e-39	Tb427_110160900	TRUE
3308	Tb427-060008400	0	0.00990099	6.58651e-41	0.715074	4.94385	FALSE	22062.9	1.58959	0.174738	1.5325	2.1785e-39	Tb427_060008400	FALSE
7829	Tb427-110015700	0	0.00990099	9.40692e-41	0.706374	4.21264	FALSE	19724.8	1.16233	0.277487	1.5711	3.10077e-39	Tb427_110015700	FALSE
5113	Tb427-080068700	0	0.00990099	2.3254e-40	0.281593	4.90078	FALSE	10097.4	0.293883	0.740707	2.94454	7.63915e-39	Tb427_080068700	TRUE
7391	Tb427-100135800	0	0.00990099	5.91098e-40	0.207462	4.95006	FALSE	8872.76	0.240281	0.78377	4.66521	1.93525e-38	Tb427_100135800	TRUE
7167	Tb427-100112800	0	0.00990099	6.15732e-40	0.517991	4.71835	FALSE	3395.04	0.0668026	0.932461	42.6717	2.00911e-38	Tb427_100112800	FALSE
6059	Tb427-090085200	0	0.00990099	8.27309e-40	0.422557	4.96703	FALSE	6645.15	0.152774	0.859293	6.32812	2.69042e-38	Tb427_090085200	TRUE
2100	Tb427-030038100	0	0.00990099	9.27914e-40	0.760161	4.83145	FALSE	5588.38	0.119999	0.887958	6.30341	3.00749e-38	Tb427_030038100	FALSE
6011	Tb427-090080400	0	0.00990099	1.00502e-39	0.307305	4.83333	FALSE	12176.1	0.400976	0.657853	1.88962	3.24653e-38	Tb427_090080400	TRUE
7092	Tb427-100104100	0	0.00990099	1.80901e-39	0.337479	4.98332	FALSE	6739.93	0.159606	0.849215	4.30121	5.82429e-38	Tb427_100104100	TRUE
3443	Tb427-060023400	0	0.00990099	2.10843e-39	0.865896	4.91365	FALSE	6419.76	0.146391	0.865314	5.02093	6.76584e-38	Tb427_060023400	FALSE
7077	Tb427-100102600	0	0.00990099	3.36377e-39	0.658826	4.87327	FALSE	15984.5	0.715307	0.445288	1.76709	1.07585e-37	Tb427_100102600	TRUE
4941	Tb427-080050800	0	0.00990099	3.52452e-39	0.334284	3.96016	FALSE	14407.1	0.563717	0.535079	1.71854	1.12356e-37	Tb427_080050800	FALSE
7678	Tb427-100167200	0	0.00990099	5.55568e-39	0.289417	3.85496	FALSE	22326.6	2.13725	0.041623	1.21156	1.76525e-37	Tb427_100167200	FALSE
5214	Tb427-080078900	0	0.00990099	6.08508e-39	0.600683	4.96438	FALSE	11909.4	0.389607	0.665576	2.58539	1.92714e-37	Tb427_080078900	FALSE
2861	Tb427-050009000	0	0.00990099	7.77425e-39	0.875441	4.80873	FALSE	22582.2	2.12903	0.0541885	1.23	2.45408e-37	Tb427_050009000	TRUE
2533	Tb427-040027000	0	0.00990099	8.07855e-39	0.71785	4.83848	FALSE	16429.3	0.745627	0.439136	1.95108	2.54186e-37	Tb427_040027000	TRUE
6841	Tb427-100078300	0	0.00990099	9.14852e-39	0.508641	4.68685	FALSE	16211.3	0.727777	0.44267	1.60922	2.8692e-37	Tb427_100078300	TRUE
3742	Tb427-060056000	0	0.00990099	1.72762e-38	0.342189	4.83427	FALSE	7667.8	0.188091	0.829843	3.2542	5.40076e-37	Tb427_060056000	FALSE
3348	Tb427-060012400	0	0.00990099	1.99298e-38	0.803499	4.86481	FALSE	6279.16	0.141751	0.870026	4.70449	6.21029e-37	Tb427_060012400	TRUE
6823	Tb427-100076500	0	0.00990099	2.1592e-38	0.96665	4.67828	FALSE	8006.9	0.201604	0.813743	4.0222	6.70666e-37	Tb427_100076500	FALSE
7507	Tb427-100148200	0	0.00990099	3.46768e-38	0.41733	4.64487	FALSE	20143.9	1.30906	0.206152	1.28701	1.07365e-36	Tb427_100148200	TRUE
3589	Tb427-060039600	0	0.00990099	5.86704e-38	0.6993	4.92999	FALSE	4121.04	0.0799712	0.923429	19.1556	1.81075e-36	Tb427_060039600	FALSE
5988	Tb427-090078100	0	0.00990099	6.61289e-38	0.727092	4.63206	FALSE	9125.17	0.250565	0.768586	3.59949	2.03446e-36	Tb427_090078100	FALSE
5020	Tb427-080059400	0	0.00990099	6.75606e-38	0.2295	4.92687	FALSE	7567.27	0.186487	0.829188	4.05644	2.07193e-36	Tb427_080059400	TRUE
7389	Tb427-100135600	0	0.00990099	8.24034e-38	0.314124	3.81655	FALSE	22370.8	2.20336	0.0331152	1.16608	2.51915e-36	Tb427_100135600	FALSE
4730	Tb427-080029500	0	0.00990099	1.72358e-37	0.931289	4.66656	FALSE	19088.5	1.09868	0.278665	1.4642	5.2526e-36	Tb427_080029500	FALSE
9250	Tb427-110167200	0	0.00990099	2.10739e-37	0.250268	4.95976	FALSE	12790.8	0.447028	0.620419	2.23379	6.4021e-36	Tb427_110167200	TRUE
5237	Tb427-080081200	0	0.00990099	2.15266e-37	0.375069	4.93255	FALSE	7000.17	0.164207	0.848822	3.65822	6.51919e-36	Tb427_080081200	TRUE
7990	Tb427-110032000	0	0.00990099	2.43587e-37	0.929024	4.9039	FALSE	4854.84	0.100908	0.903272	15.8288	7.35391e-36	Tb427_110032000	TRUE
5089	Tb427-080066300	0	0.00990099	2.47408e-37	0.525327	4.2105	FALSE	19016.3	1.10321	0.262958	1.3288	7.44607e-36	Tb427_080066300	TRUE
7287	Tb427-100125300	0	0.00990099	3.71265e-37	0.692523	4.91028	FALSE	10458.4	0.313918	0.720288	2.73231	1.11391e-35	Tb427_100125300	TRUE
2335	Tb427-040007200	0	0.00990099	4.51307e-37	0.7068	4.81996	FALSE	8963.48	0.24075	0.779581	3.53213	1.34988e-35	Tb427_040007200	FALSE
3267	Tb427-050052200	0	0.00990099	7.28812e-37	0.844565	4.76611	FALSE	15645.9	0.671618	0.473298	1.64645	2.17321e-35	Tb427_050052200	TRUE
2515	Tb427-040025200	0	0.00990099	7.86838e-37	0.971657	4.95509	FALSE	5421.93	0.115434	0.891492	8.34164	2.33903e-35	Tb427_040025200	TRUE
7668	Tb427-100165000	0	0.00990099	7.90805e-37	0.383041	4.95146	FALSE	5542.23	0.120084	0.889529	8.11856	2.34364e-35	Tb427_100165000	TRUE
7326	Tb427-100129200	0	0.00990099	8.07345e-37	0.352469	4.91457	FALSE	5600.4	0.122413	0.883115	12.2615	2.38536e-35	Tb427_100129200	TRUE
6436	Tb427-100036200	0	0.00990099	2.98443e-36	0.317706	4.9312	FALSE	6150.83	0.137995	0.872513	7.80502	8.7909e-35	Tb427_100036200	TRUE
4123	Tb427-070045300	0	0.00990099	3.63199e-36	0.973006	4.92981	FALSE	9302.9	0.2561	0.774869	3.39372	1.06659e-34	Tb427_070045300	TRUE
2242	Tb427-030053200:pseudogene	0	0.00990099	5.24033e-36	0.776858	4.63325	FALSE	15552.3	0.660357	0.475524	1.59173	1.53426e-34	Tb427_030053200:pseudogene	FALSE
8815	Tb427-110122800	0	0.00990099	8.5102e-36	0.15292	4.54782	FALSE	17378.5	0.843501	0.389398	1.43097	2.48411e-34	Tb427_110122800	FALSE
8200	Tb427-110053500	0	0.00990099	8.60166e-36	0.483175	4.93578	FALSE	11127	0.346006	0.695942	2.68388	2.50326e-34	Tb427_110053500	TRUE
6453	Tb427-100037900	0	0.00990099	8.95141e-36	0.349022	4.6318	FALSE	7786.71	0.190939	0.821859	2.16176	2.59725e-34	Tb427_100037900	FALSE
8608	Tb427-110094400	0	0.00990099	1.02714e-35	0.450784	4.95919	FALSE	7405.65	0.180401	0.835471	5.54887	2.97134e-34	Tb427_110094400	TRUE
9079	Tb427-110150100	0	0.00990099	1.22093e-35	0.58772	4.74566	FALSE	18599.1	0.984958	0.339529	1.44291	3.52143e-34	Tb427_110150100	FALSE
3374	Tb427-060015400	0	0.00990099	2.06166e-35	0.05963	4.92761	FALSE	7997.56	0.202999	0.814005	3.47935	5.92866e-34	Tb427_060015400	TRUE
9479	9S-rRNA	0	0.00990099	2.14243e-35	0.525745	3.6619	FALSE	22625.1	1.96509	0.0866492	1.22641	6.14269e-34	9S_rRNA	FALSE
3401	Tb427-060018100	0.000164969	0.00990099	2.16897e-35	0.718077	3.5669	FALSE	23305.1	2.67655	0.0128272	1.11884	6.20045e-34	Tb427_060018100	FALSE
7017	Tb427-100096600	0	0.00990099	2.96892e-35	0.787751	4.95162	FALSE	6587.92	0.151851	0.863089	3.98919	8.4623e-34	Tb427_100096600	FALSE
1345	Tb427-010012500	0	0.00990099	3.35622e-35	0.752397	4.93187	FALSE	10144.2	0.289712	0.748822	2.36065	9.53815e-34	Tb427_010012500	FALSE
4463	Tb427-070080400	0	0.00990099	4.34585e-35	0.0763075	4.90527	FALSE	7522.33	0.184664	0.830497	4.48843	1.23145e-33	Tb427_070080400	TRUE
4835	Tb427-080040200	0	0.00990099	4.96244e-35	0.913605	4.88514	FALSE	4883.95	0.099155	0.907723	5.70132	1.40207e-33	Tb427_080040200	FALSE
4400	Tb427-070073300	0	0.00990099	5.27128e-35	0.176736	4.98149	FALSE	6930.54	0.162507	0.851702	4.30061	1.48069e-33	Tb427_070073300	TRUE
1946	Tb427-030019900	0	0.00990099	5.26632e-35	0.547286	4.76138	FALSE	7228.04	0.177021	0.831283	3.145	1.48069e-33	Tb427_030019900	TRUE
5351	Tb427-090009100	0	0.00990099	5.40094e-35	0.0383385	4.94105	FALSE	7453.92	0.181155	0.835602	3.96582	1.51273e-33	Tb427_090009100	FALSE
3965	Tb427-070027700	0	0.00990099	8.55447e-35	0.498693	4.82472	FALSE	8040.43	0.202635	0.814267	3.47275	2.38909e-33	Tb427_070027700	FALSE
8931	Tb427-110134700	0	0.00990099	9.35137e-35	0.768114	4.87764	FALSE	7814.45	0.194415	0.822906	3.37767	2.60414e-33	Tb427_110134700	FALSE
3617	Tb427-060042400	0	0.00990099	1.4204e-34	0.831423	4.63612	FALSE	19814.4	1.28961	0.191885	1.30371	3.94414e-33	Tb427_060042400	FALSE
1730	Tb427-020026400	0	0.00990099	1.5233e-34	0.350898	4.77149	FALSE	16279.8	0.727261	0.448037	1.83057	4.21779e-33	Tb427_020026400	FALSE
7218	Tb427-100117900	0	0.00990099	1.98212e-34	0.450808	4.65631	FALSE	16458.2	0.746537	0.434162	1.47577	5.47258e-33	Tb427_100117900	FALSE
3717	Tb427-060053000	0	0.00990099	2.62504e-34	0.168636	4.55675	FALSE	11811.9	0.37831	0.673298	2.11807	7.22707e-33	Tb427_060053000	TRUE
7106	Tb427-100105500	0	0.00990099	3.20649e-34	0.459342	4.8514	FALSE	13219.1	0.468991	0.609948	2.49807	8.80285e-33	Tb427_100105500	TRUE
7358	Tb427-100132400	0	0.00990099	4.3359e-34	0.891784	4.69066	FALSE	20759.4	1.48044	0.154712	1.3717	1.18698e-32	Tb427_100132400	FALSE
5310	Tb427-090005000	0	0.00990099	4.46079e-34	0.833085	4.73128	FALSE	3000.01	0.0533895	0.945681	25.873	1.21773e-32	Tb427_090005000	TRUE
9045	Tb427-110146500	0	0.00990099	4.66981e-34	0.623528	4.89972	FALSE	6623.88	0.152486	0.853665	3.07749	1.27121e-32	Tb427_110146500	TRUE
7960	Tb427-110029000	0	0.00990099	5.10229e-34	0.114095	4.72562	FALSE	19400.7	1.18964	0.229712	1.46177	1.38505e-32	Tb427_110029000	FALSE
5784	Tb427-090055200	0	0.00990099	5.58579e-34	0.80074	4.89619	FALSE	8920.24	0.239903	0.784162	3.39624	1.51206e-32	Tb427_090055200	TRUE
4512	Tb427-080005200	0	0.00990099	6.1755e-34	0.140299	4.99053	FALSE	14871.5	0.555513	0.593848	3.58488	1.66704e-32	Tb427_080005200	FALSE
5495	Tb427-090025700	0	0.00990099	7.09896e-34	0.320935	4.86225	FALSE	11825.7	0.384798	0.664267	2.15052	1.911e-32	Tb427_090025700	TRUE
4321	Tb427-070065100	0	0.00990099	8.57092e-34	0.442626	4.86232	FALSE	6372.08	0.144066	0.865707	5.36925	2.30085e-32	Tb427_070065100	TRUE
8866	Tb427-110127900	0	0.00990099	1.04328e-33	0.753502	4.66166	FALSE	6061.64	0.135029	0.872251	6.23586	2.79292e-32	Tb427_110127900	FALSE
3824	Tb427-070012600	0	0.00990099	1.07209e-33	0.850426	4.21063	FALSE	13061.3	0.462564	0.606675	2.09621	2.86215e-32	Tb427_070012600	TRUE
6143	Tb427-100005900	0	0.00990099	1.24421e-33	0.434181	4.9175	FALSE	5900.29	0.130575	0.878403	7.49819	3.31253e-32	Tb427_100005900	FALSE
2267	Tb427-030055700	0	0.00990099	1.24877e-33	0.881881	4.93499	FALSE	7872.61	0.197802	0.815445	3.31037	3.31558e-32	Tb427_030055700	FALSE
2219	Tb427-030050500	0	0.00990099	1.39325e-33	0.00499324	4.85876	FALSE	10273.9	0.299297	0.741623	2.79738	3.68906e-32	Tb427_030050500	TRUE
8219	Tb427-110055400	0	0.00990099	1.42084e-33	0.264515	4.93161	FALSE	7758.89	0.192977	0.826309	4.19468	3.75187e-32	Tb427_110055400	TRUE
4323	Tb427-070065500	1.01913e-06	0.00990099	1.49217e-33	0.538818	2.6338	FALSE	21656.6	1.89219	0.0637435	1.16507	3.92951e-32	Tb427_070065500	FALSE
4823	Tb427-080038900	0	0.00990099	1.61638e-33	0.0730694	4.94246	FALSE	3749.13	0.0701415	0.933508	20.1359	4.24508e-32	Tb427_080038900	FALSE
4467	Tb427-070080800	0	0.00990099	1.79842e-33	0.156622	4.92034	FALSE	6843.48	0.158384	0.855105	4.2238	4.71041e-32	Tb427_070080800	FALSE
2760	Tb427-040050900	0	0.00990099	1.84344e-33	0.946983	4.42555	FALSE	10834.9	0.325039	0.711649	1.9052	4.81531e-32	Tb427_040050900	FALSE
4713	Tb427-080027800	0	0.00990099	1.8535e-33	0.228594	4.50297	FALSE	14158	0.540556	0.553272	2.00186	4.82856e-32	Tb427_080027800	FALSE
2060	Tb427-030032600	0	0.00990099	2.32894e-33	0.592441	4.86193	FALSE	15035.5	0.606645	0.518063	1.6275	6.05088e-32	Tb427_030032600	TRUE
8672	Tb427-110101800	0	0.00990099	3.09135e-33	0.350024	4.27346	FALSE	14621.4	0.575724	0.534686	1.72535	8.01023e-32	Tb427_110101800	FALSE
7504	Tb427-100147900	0	0.00990099	3.17369e-33	0.965365	4.90596	FALSE	5445.65	0.115687	0.891754	7.5216	8.20165e-32	Tb427_100147900	TRUE
8941	Tb427-110135700	0	0.00990099	4.23747e-33	0.861157	4.89848	FALSE	6600.87	0.154834	0.856414	8.5378	1.09216e-31	Tb427_110135700	TRUE
1886	Tb427-030013900	0	0.00990099	5.25313e-33	0.935154	4.90828	FALSE	9050.14	0.243044	0.783639	2.74623	1.35035e-31	Tb427_030013900	TRUE
6158	Tb427-100007400	0	0.00990099	5.32632e-33	0.495909	4.71581	FALSE	4626.58	0.0913461	0.912173	6.58531	1.36554e-31	Tb427_100007400	FALSE
4797	Tb427-080036300	0	0.00990099	9.59138e-33	0.72867	4.89801	FALSE	7803.31	0.19236	0.822775	3.28496	2.45251e-31	Tb427_080036300	FALSE
5821	Tb427-090058900	0	0.00990099	1.10802e-32	0.962384	4.90265	FALSE	15986	0.692769	0.467932	1.64052	2.82575e-31	Tb427_090058900	FALSE
4084	Tb427-070041400	0	0.00990099	1.393e-32	0.456691	4.89323	FALSE	8140.79	0.208855	0.804319	2.6077	3.54318e-31	Tb427_070041400	FALSE
3781	Tb427-070008300	0	0.00990099	1.56527e-32	0.241669	4.8899	FALSE	6651.46	0.151248	0.863089	3.16469	3.97094e-31	Tb427_070008300	TRUE
4654	Tb427-080021800	0	0.00990099	1.82595e-32	0.126782	4.97484	FALSE	5481.49	0.119305	0.887304	20.3694	4.62019e-31	Tb427_080021800	TRUE
1856	Tb427-030010900	2.34379e-06	0.00990099	1.92856e-32	0.835792	3.55006	FALSE	22495.7	2.28013	0.0294503	1.14951	4.8671e-31	Tb427_030010900	FALSE
7973	Tb427-110030300	0	0.00990099	3.22137e-32	0.893564	4.40678	FALSE	12825	0.44394	0.620681	1.80484	8.10864e-31	Tb427_110030300	TRUE
4040	Tb427-070037000	0	0.00990099	3.63161e-32	0.58108	4.93205	FALSE	10741.3	0.323261	0.715707	2.66387	9.1176e-31	Tb427_070037000	TRUE
2513	Tb427-040025000	0	0.00990099	4.79615e-32	0.187987	4.8959	FALSE	9929.71	0.283601	0.745681	2.86927	1.20102e-30	Tb427_040025000	FALSE
6404	Tb427-100032500	0	0.00990099	5.1987e-32	0.953702	4.08861	FALSE	15858.5	0.68099	0.471204	1.55977	1.29847e-30	Tb427_100032500	FALSE
4861	Tb427-080042800	0	0.00990099	5.70363e-32	0.21181	4.40972	FALSE	9071.17	0.246013	0.773168	2.48316	1.42092e-30	Tb427_080042800	TRUE
6517	Tb427-100044300	0	0.00990099	6.50082e-32	0.059992	4.92043	FALSE	9980.51	0.285684	0.747906	2.73613	1.61537e-30	Tb427_100044300	TRUE
8819	Tb427-110123200	0	0.00990099	9.39044e-32	0.55169	4.60955	FALSE	10590.9	0.314468	0.717147	2.05794	2.32744e-30	Tb427_110123200	TRUE
5533	Tb427-090029500	0	0.00990099	1.18511e-31	0.697378	4.90778	FALSE	8144.06	0.207769	0.811649	3.59999	2.92982e-30	Tb427_090029500	TRUE
9360	Tb427-110178400	0	0.00990099	1.36477e-31	0.940995	3.8783	FALSE	19036.5	1.09761	0.271466	1.33173	3.36539e-30	Tb427_110178400	FALSE
5120	Tb427-080069400	0	0.00990099	1.46121e-31	0.823085	4.76227	FALSE	8699.4	0.230904	0.789398	3.89187	3.59406e-30	Tb427_080069400	FALSE
8177	Tb427-110051100	0	0.00990099	1.73568e-31	0.791592	4.79904	FALSE	17226.6	0.825399	0.39555	1.44058	4.25836e-30	Tb427_110051100	FALSE
9478	12S-rRNA	3.8353e-05	0.00990099	1.85785e-31	0.237429	2.99758	FALSE	24755.6	3.46163	0.00274869	1.09736	4.54658e-30	12S_rRNA	FALSE
9437	Tb427-110186200	0	0.00990099	2.07132e-31	0.421263	4.90397	FALSE	6716.15	0.155114	0.857199	3.48847	5.0562e-30	Tb427_110186200	TRUE
7442	Tb427-100140900	0	0.00990099	2.48445e-31	0.320806	4.89908	FALSE	9718.59	0.274094	0.754581	3.01242	6.04945e-30	Tb427_100140900	TRUE
7905	Tb427-110023400	0	0.00990099	3.7853e-31	0.0301562	4.58231	FALSE	8174.06	0.209712	0.805759	3.11108	9.19382e-30	Tb427_110023400	FALSE
6589	Tb427-100051600	0	0.00990099	4.18333e-31	0.587276	4.42445	FALSE	13405.7	0.484238	0.591099	1.73556	1.01352e-29	Tb427_100051600	FALSE
2756	Tb427-040050500	0	0.00990099	4.28139e-31	0.367189	4.86017	FALSE	12023.6	0.395991	0.657984	2.06669	1.03469e-29	Tb427_040050500	TRUE
1692	Tb427-020022500	0	0.00990099	6.95439e-31	0.963326	4.31333	FALSE	15907	0.681594	0.471073	1.36949	1.67649e-29	Tb427_020022500	FALSE
3116	Tb427-050035500	0	0.00990099	1.01876e-30	0.567712	4.70199	FALSE	5729.55	0.126334	0.880105	6.35085	2.44983e-29	Tb427_050035500	FALSE
3098	Tb427-050033700	0	0.00990099	1.0381e-30	0.8394	4.9125	FALSE	7632.64	0.186595	0.829712	3.94667	2.49016e-29	Tb427_050033700	FALSE
7821	Tb427-110014900	0	0.00990099	1.04177e-30	0.563967	4.43501	FALSE	19712.4	1.25538	0.208508	1.41482	2.4928e-29	Tb427_110014900	FALSE
6915	Tb427-100085800	0	0.00990099	1.04515e-30	0.968917	4.7624	FALSE	6294.13	0.141814	0.86623	6.01872	2.49472e-29	Tb427_100085800	FALSE
3123	Tb427-050036200	0	0.00990099	1.22422e-30	0.871746	4.96437	FALSE	8242.55	0.212616	0.806414	4.08835	2.91497e-29	Tb427_050036200	TRUE
4264	Tb427-070059400:pseudogene	0	0.00990099	1.47289e-30	0.240579	4.94777	FALSE	9456.44	0.259798	0.768325	3.05151	3.49848e-29	Tb427_070059400:pseudogene	FALSE
4968	Tb427-080053900	0	0.00990099	1.79733e-30	0.92532	4.90418	FALSE	10946.6	0.334614	0.706021	2.44878	4.25866e-29	Tb427_080053900	TRUE
7139	Tb427-100108800	0	0.00990099	2.22715e-30	0.73505	4.99601	FALSE	14642.3	0.511847	0.671204	2.51899	5.26423e-29	Tb427_100108800	TRUE
4175	Tb427-070050500	0	0.00990099	2.89681e-30	0.719056	4.64441	FALSE	12622.5	0.427779	0.63822	1.73273	6.8304e-29	Tb427_070050500	FALSE
5556	Tb427-090031800	0	0.00990099	2.93241e-30	0.88387	4.46293	FALSE	22868.4	2.2054	0.0413613	1.19043	6.89757e-29	Tb427_090031800	FALSE
5525	Tb427-090028700	0	0.00990099	3.26706e-30	0.725321	4.93101	FALSE	6411.16	0.144842	0.865838	5.49479	7.66613e-29	Tb427_090028700	FALSE
9226	Tb427-110164800	0	0.00990099	3.74756e-30	0.413126	4.94931	FALSE	8886.09	0.237661	0.790445	3.56954	8.77237e-29	Tb427_110164800	TRUE
2864	Tb427-050009300	0	0.00990099	5.52421e-30	0.296136	4.57165	FALSE	9788.51	0.276813	0.748037	2.06702	1.29e-28	Tb427_050009300	FALSE
4804	Tb427-080037000	0	0.00990099	5.7531e-30	0.981413	4.33916	FALSE	13902.8	0.51572	0.576047	1.83173	1.34022e-28	Tb427_080037000	TRUE
4523	Tb427-080006300	0	0.00990099	6.03638e-30	0.68801	4.90207	FALSE	11692.6	0.370582	0.683901	2.49432	1.40284e-28	Tb427_080006300	TRUE
2361	Tb427-040009800	0	0.00990099	6.15866e-30	0.341655	4.9164	FALSE	7157.93	0.16992	0.843325	4.19221	1.42784e-28	Tb427_040009800	FALSE
9050	Tb427-110147000	0	0.00990099	8.18991e-30	0.643444	4.61173	FALSE	14204.3	0.539465	0.558115	1.89703	1.89423e-28	Tb427_110147000	FALSE
8153	Tb427-110048600	0	0.00990099	9.12961e-30	0.0181538	4.93216	FALSE	7092.85	0.167601	0.846204	3.74738	2.10655e-28	Tb427_110048600	FALSE
4456	Tb427-070079700	0	0.00990099	9.15627e-30	0.504494	4.93184	FALSE	7495.96	0.182344	0.834031	3.28696	2.10768e-28	Tb427_070079700	FALSE
8794	Tb427-110120700	0	0.00990099	9.18754e-30	0.162121	4.43635	FALSE	13244.7	0.472321	0.603272	1.73021	2.10987e-28	Tb427_110120700	TRUE
3415	Tb427-060019500	0	0.00990099	1.11603e-29	0.697828	4.28007	FALSE	10717.5	0.323493	0.711387	2.4044	2.55685e-28	Tb427_060019500	FALSE
4743	Tb427-080030800	0	0.00990099	1.25185e-29	0.92764	4.83703	FALSE	14370	0.554699	0.546204	1.76709	2.86125e-28	Tb427_080030800	FALSE
4302	Tb427-070063200	0	0.00990099	1.67492e-29	0.745065	4.87089	FALSE	7386.96	0.17891	0.831152	2.75831	3.81921e-28	Tb427_070063200	TRUE
8680	Tb427-110102600	0	0.00990099	2.47188e-29	0.980089	4.952	FALSE	4182.59	0.0806352	0.923691	12.1604	5.62323e-28	Tb427_110102600	FALSE
5867	Tb427-090063900	0	0.00990099	2.68234e-29	0.76332	4.59428	FALSE	8709.71	0.230188	0.784948	2.14923	6.08771e-28	Tb427_090063900	FALSE
4972	Tb427-080054300	0	0.00990099	3.20377e-29	0.109966	4.91156	FALSE	6091.1	0.135187	0.873429	4.37575	7.25415e-28	Tb427_080054300	TRUE
6357	Tb427-100027800:pseudogene	0	0.00990099	3.31747e-29	0.73653	4.73928	FALSE	19360.5	1.15831	0.248037	1.29138	7.49407e-28	Tb427_100027800:pseudogene	FALSE
2929	Tb427-050015900	0	0.00990099	3.42065e-29	0.502541	4.93006	FALSE	13113.3	0.462463	0.607853	1.69906	7.7092e-28	Tb427_050015900	TRUE
2261	Tb427-030055100	0	0.00990099	4.30072e-29	0.63907	4.9315	FALSE	6631.27	0.15286	0.856937	6.73239	9.67013e-28	Tb427_030055100	FALSE
7998	Tb427-110032800	0	0.00990099	4.85619e-29	0.436739	3.98225	FALSE	11782.6	0.380259	0.665838	1.83253	1.08938e-27	Tb427_110032800	FALSE
1967	Tb427-030022000	0	0.00990099	5.03841e-29	0.666532	3.53842	FALSE	22267	2.03326	0.0578534	1.16734	1.12765e-27	Tb427_030022000	FALSE
5632	Tb427-090039700	0	0.00990099	5.69435e-29	0.431207	4.95086	FALSE	5115.7	0.106904	0.901571	14.2931	1.27152e-27	Tb427_090039700	FALSE
4426	Tb427-070076700	0	0.00990099	8.14113e-29	0.655445	3.96378	FALSE	15831.5	0.681841	0.471859	1.64226	1.81369e-27	Tb427_070076700	FALSE
5428	Tb427-090018600	0	0.00990099	9.10105e-29	0.544462	4.84241	FALSE	15587.5	0.667835	0.469372	1.49976	2.0229e-27	Tb427_090018600	FALSE
9489	ND4	0	0.00990099	9.1243e-29	0.588368	4.03261	FALSE	21298.3	1.7206	0.0882199	1.15444	2.02342e-27	ND4	FALSE
6266	Tb427-100018300	0	0.00990099	2.19704e-28	0.958479	4.92716	FALSE	6871.73	0.160362	0.85	4.41834	4.86107e-27	Tb427_100018300	FALSE
9392	Tb427-110181700	0	0.00990099	4.16269e-28	0.584169	4.82805	FALSE	10071.4	0.2869	0.744764	2.04894	9.1892e-27	Tb427_110181700	FALSE
2552	Tb427-040028900	0	0.00990099	4.48012e-28	0.55413	4.64375	FALSE	12860.3	0.445373	0.619634	1.72769	9.86746e-27	Tb427_040028900	FALSE
6170	Tb427-100008600	0	0.00990099	4.52653e-28	0.925858	3.74184	FALSE	20968.8	1.56449	0.132853	1.2373	9.94708e-27	Tb427_100008600	FALSE
8870	Tb427-110128300	0	0.00990099	4.58737e-28	0.486979	4.87008	FALSE	11664.7	0.372107	0.673822	1.88597	1.0058e-26	Tb427_110128300	FALSE
7790	Tb427-110011700	0	0.00990099	5.097e-28	0.248375	4.29199	FALSE	12610	0.43	0.627618	1.79343	1.11501e-26	Tb427_110011700	FALSE
8208	Tb427-110054300	0	0.00990099	5.43007e-28	0.237158	4.7192	FALSE	10880.5	0.330163	0.705497	1.86805	1.1852e-26	Tb427_110054300	FALSE
2416	Tb427-040015300	0.021566	0.00990099	5.46414e-28	0.605594	2.99988	FALSE	24139.6	3.2052	0.0026178	1.0765	1.18996e-26	Tb427_040015300	FALSE
8165	Tb427-110049900	0	0.00990099	8.26074e-28	0.411916	4.60056	FALSE	14448.6	0.563348	0.536387	1.56351	1.79495e-26	Tb427_110049900	FALSE
2936	Tb427-050016600	0	0.00990099	8.42749e-28	0.941042	4.93093	FALSE	8818.79	0.232336	0.790314	3.48838	1.82709e-26	Tb427_050016600	TRUE
5578	Tb427-090034100	0	0.00990099	1.11653e-27	0.808482	4.31497	FALSE	8628.05	0.226406	0.789921	2.70359	2.41524e-26	Tb427_090034100	TRUE
5941	Tb427-090071900	0	0.00990099	1.2088e-27	0.926506	4.80135	FALSE	6972.99	0.1611	0.851047	2.79647	2.60902e-26	Tb427_090071900	TRUE
7212	Tb427-100117300	0	0.00990099	1.36878e-27	0.321212	4.939	FALSE	10607.5	0.316577	0.721073	2.55264	2.94775e-26	Tb427_100117300	TRUE
1641	Tb427-020017400	0	0.00990099	1.50374e-27	0.480033	4.94903	FALSE	5936.35	0.129071	0.87945	5.93485	3.2312e-26	Tb427_020017400	FALSE
5395	Tb427-090014800	2.00065e-05	0.00990099	1.65099e-27	0.679997	3.55101	FALSE	22781	2.42301	0.0213351	1.15198	3.53976e-26	Tb427_090014800	FALSE
7950	Tb427-110028000	0	0.00990099	2.19661e-27	0.255352	4.92986	FALSE	4439.33	0.0861537	0.918848	8.97025	4.6992e-26	Tb427_110028000	TRUE
4309	Tb427-070063900	0	0.00990099	2.38135e-27	0.0849186	4.88904	FALSE	6089.51	0.132708	0.878141	3.3932	5.08318e-26	Tb427_070063900	FALSE
8095	Tb427-110042800	0	0.00990099	2.72614e-27	0.551429	3.89368	FALSE	14872.2	0.59057	0.524346	1.43764	5.80637e-26	Tb427_110042800	FALSE
7379	Tb427-100134600	0	0.00990099	3.35509e-27	0.735166	4.78786	FALSE	11607.9	0.370535	0.678796	2.71524	7.1303e-26	Tb427_100134600	FALSE
3520	Tb427-060032700	0	0.00990099	3.55825e-27	0.762369	4.93231	FALSE	7529.22	0.181667	0.835733	2.93404	7.54551e-26	Tb427_060032700	FALSE
6572	Tb427-100049900	0	0.00990099	3.72414e-27	0.969046	4.59483	FALSE	9261.84	0.251929	0.774346	2.99946	7.88006e-26	Tb427_100049900	FALSE
5693	Tb427-090046100	0	0.00990099	4.38083e-27	0.451135	4.90387	FALSE	4557.03	0.091286	0.913874	10.4477	9.22926e-26	Tb427_090046100	FALSE
8229	Tb427-110056400	0	0.00990099	4.37973e-27	0.375625	4.94079	FALSE	5647.26	0.121555	0.885995	8.64817	9.22926e-26	Tb427_110056400	FALSE
6463	Tb427-100038900	0	0.00990099	4.4462e-27	0.754825	4.44364	FALSE	4909.54	0.0996013	0.901571	4.23887	9.34667e-26	Tb427_100038900	FALSE
1332	Tb427-010011200	0	0.00990099	4.86623e-27	0.0390747	4.72203	FALSE	5180.64	0.106421	0.896073	2.94009	1.02075e-25	Tb427_010011200	TRUE
9165	Tb427-110158700	0	0.00990099	7.57487e-27	0.391355	3.82904	FALSE	20404.5	1.35106	0.195812	1.28774	1.58549e-25	Tb427_110158700	FALSE
6389	Tb427-100031000	0	0.00990099	7.91377e-27	0.351931	4.63372	FALSE	14753.5	0.584582	0.526702	1.76059	1.65285e-25	Tb427_100031000	FALSE
7132	Tb427-100108100	0	0.00990099	9.29001e-27	0.886194	4.1141	FALSE	11300.4	0.350919	0.690052	1.7102	1.93612e-25	Tb427_100108100	FALSE
2634	Tb427-040037500	0	0.00990099	1.18949e-26	0.908952	4.89098	FALSE	8662.26	0.226166	0.796859	2.80446	2.47368e-25	Tb427_040037500	FALSE
8517	Tb427-110085200	0	0.00990099	1.21295e-26	0.582811	4.81427	FALSE	10232.4	0.296265	0.738482	3.01045	2.51707e-25	Tb427_110085200	TRUE
4468	Tb427-070080900	0	0.00990099	1.27067e-26	0.187951	4.84366	FALSE	6534.22	0.148501	0.862173	3.67744	2.63121e-25	Tb427_070080900	TRUE
9270	Tb427-110169200	0	0.00990099	1.37624e-26	0.50444	4.91043	FALSE	10695.6	0.320495	0.718586	2.41252	2.84375e-25	Tb427_110169200	TRUE
8678	Tb427-110102400	0	0.00990099	1.4507e-26	0.689082	4.24671	FALSE	9402.86	0.25862	0.761126	1.90952	2.99121e-25	Tb427_110102400	FALSE
674	Tb427-000666100	0	0.00990099	1.51903e-26	0.962819	1.00063	FALSE	21766.9	1.81881	0.0859948	1.20091	3.12546e-25	Tb427_000666100	FALSE
8168	Tb427-110050200	0	0.00990099	1.68515e-26	0.269254	4.91755	FALSE	9716.05	0.274356	0.756806	2.77143	3.45992e-25	Tb427_110050200	TRUE
9245	Tb427-110166700	0	0.00990099	1.92957e-26	0.910011	4.88535	FALSE	6617.04	0.151626	0.859162	4.84734	3.95337e-25	Tb427_110166700	TRUE
3079	Tb427-050031800	0	0.00990099	2.39126e-26	0.299944	4.75006	FALSE	8014.54	0.198673	0.818979	3.15508	4.88897e-25	Tb427_050031800	FALSE
8049	Tb427-110038000	0	0.00990099	3.58459e-26	0.239019	4.86208	FALSE	8244.91	0.209121	0.809817	2.9315	7.31331e-25	Tb427_110038000	TRUE
7956	Tb427-110028600	0	0.00990099	4.77076e-26	0.859018	4.5928	FALSE	18207.9	0.95633	0.335209	1.44261	9.7129e-25	Tb427_110028600	FALSE
8958	Tb427-110137500	0	0.00990099	7.32244e-26	0.948467	4.34447	FALSE	7854.03	0.195201	0.816623	3.05515	1.48767e-24	Tb427_110137500	FALSE
5081	Tb427-080065500	0	0.00990099	1.19619e-25	0.560009	4.88931	FALSE	15739	0.659154	0.493586	1.5012	2.42516e-24	Tb427_080065500	FALSE
8355	Tb427-110069000	0	0.00990099	1.57799e-25	0.725858	4.78225	FALSE	11356.4	0.354988	0.686387	1.78826	3.19254e-24	Tb427_110069000	FALSE
2775	Tb427-040052400	0	0.00990099	1.99863e-25	0.0452204	4.6244	FALSE	13294.7	0.470775	0.605628	1.60972	4.03515e-24	Tb427_040052400	TRUE
8352	Tb427-110068700	0	0.00990099	3.56047e-25	0.647358	4.12129	FALSE	10285.4	0.301386	0.725262	2.0944	7.17349e-24	Tb427_110068700	FALSE
3577	Tb427-060038400	0	0.00990099	3.70263e-25	0.829555	4.89294	FALSE	6310.24	0.141461	0.866492	6.19719	7.44444e-24	Tb427_060038400	TRUE
3244	Tb427-050048300	0	0.00990099	4.29176e-25	0.806783	4.45001	FALSE	9748.24	0.274765	0.748691	2.03297	8.61107e-24	Tb427_050048300	FALSE
7728	Tb427-110005500	0	0.00990099	4.70988e-25	0.576734	3.94621	FALSE	13961.1	0.517473	0.572906	1.44692	9.43047e-24	Tb427_110005500	FALSE
3266	Tb427-050052100	0	0.00990099	5.60975e-25	0.752806	4.81071	FALSE	9861.15	0.281114	0.746859	3.12804	1.12091e-23	Tb427_050052100	TRUE
4843	Tb427-080041000	0	0.00990099	5.72381e-25	0.180814	4.76301	FALSE	10381.5	0.304277	0.728272	2.01118	1.14135e-23	Tb427_080041000	FALSE
7000	Tb427-100094900	0	0.00990099	5.94592e-25	0.318258	4.9175	FALSE	6988.51	0.163638	0.848037	4.7511	1.1832e-23	Tb427_100094900	FALSE
9251	Tb427-110167300	0	0.00990099	7.85319e-25	0.504692	4.92093	FALSE	7100.01	0.168231	0.846073	3.46427	1.55953e-23	Tb427_110167300	TRUE
8747	Tb427-110109500	0	0.00990099	9.61922e-25	0.311338	4.00058	FALSE	10804.8	0.326524	0.705105	1.76038	1.90634e-23	Tb427_110109500	FALSE
6681	Tb427-100060900	0	0.00990099	1.03707e-24	0.823281	4.94557	FALSE	13735	0.502464	0.581152	1.67188	2.05106e-23	Tb427_100060900	FALSE
6222	Tb427-100013900	0	0.00990099	1.24946e-24	0.461789	4.21952	FALSE	17740.2	0.899296	0.356152	1.43319	2.46609e-23	Tb427_100013900	FALSE
6391	Tb427-100031200	0	0.00990099	1.28289e-24	0.267486	4.9003	FALSE	6805.36	0.158019	0.852356	4.47351	2.52692e-23	Tb427_100031200	TRUE
7788	Tb427-110011500	0	0.00990099	1.48083e-24	0.293992	4.50578	FALSE	11621.2	0.369825	0.674738	2.01256	2.9109e-23	Tb427_110011500	FALSE
5690	Tb427-090045800	0	0.00990099	1.48511e-24	0.0497682	4.25272	FALSE	8893.28	0.236812	0.778403	2.05691	2.9134e-23	Tb427_090045800	FALSE
1368	Tb427-010014800	0	0.00990099	1.56786e-24	0.947555	4.58302	FALSE	10146	0.291609	0.739136	2.45728	3.06951e-23	Tb427_010014800	TRUE
6534	Tb427-100046000	0	0.00990099	1.57813e-24	0.200876	4.92671	FALSE	9409.39	0.259384	0.763874	2.846	3.0834e-23	Tb427_100046000	FALSE
2994	Tb427-050022700	0	0.00990099	2.07377e-24	0.233121	4.56736	FALSE	11696.9	0.373902	0.671597	1.69302	4.04364e-23	Tb427_050022700	FALSE
5487	Tb427-090024900	0	0.00990099	2.24154e-24	0.521507	4.73413	FALSE	9577.92	0.267567	0.753141	1.91981	4.362e-23	Tb427_090024900	FALSE
1314	Tb427-010009400	0	0.00990099	2.33404e-24	0.988177	4.89981	FALSE	6919.48	0.16225	0.85144	4.19906	4.53289e-23	Tb427_010009400	FALSE
4967	Tb427-080053800	0	0.00990099	2.34417e-24	0.781847	4.40419	FALSE	12738.8	0.436	0.626178	1.7387	4.54346e-23	Tb427_080053800	FALSE
6892	Tb427-100083500	0	0.00990099	2.47177e-24	0.177698	4.6957	FALSE	10477.2	0.310328	0.720288	1.88015	4.78123e-23	Tb427_100083500	FALSE
8546	Tb427-110088100	0	0.00990099	3.35432e-24	0.482819	4.28057	FALSE	9364.81	0.25839	0.761387	2.5122	6.47544e-23	Tb427_110088100	TRUE
9125	Tb427-110154700	0	0.00990099	3.57733e-24	0.198381	4.91041	FALSE	9481.85	0.259811	0.767408	2.39633	6.89222e-23	Tb427_110154700	TRUE
1106	Tb427-000799500:pseudogene	0	0.00990099	4.38866e-24	0.570083	4.32196	FALSE	2692.98	0.0432945	0.958377	4.15514	8.43859e-23	Tb427_000799500:pseudogene	FALSE
4891	Tb427-080045800	0	0.00990099	5.01755e-24	0.777737	3.9719	FALSE	10210.8	0.293858	0.732984	1.81509	9.62872e-23	Tb427_080045800	FALSE
9276	Tb427-110169800	0	0.00990099	6.04895e-24	0.121447	3.91475	FALSE	10516	0.3117	0.716492	1.83741	1.15851e-22	Tb427_110169800	FALSE
6149	Tb427-100006500	0	0.00990099	6.06282e-24	0.477808	4.45944	FALSE	18847.4	1.04369	0.304058	1.33763	1.15887e-22	Tb427_100006500	FALSE
4455	Tb427-070079600	0	0.00990099	6.16307e-24	0.487388	4.88458	FALSE	6693.71	0.154201	0.857853	4.93243	1.17571e-22	Tb427_070079600	FALSE
4947	Tb427-080051400	0	0.00990099	7.50181e-24	0.902642	4.65506	FALSE	10644.2	0.316807	0.716754	1.68975	1.42829e-22	Tb427_080051400	FALSE
1670	Tb427-020020300	0	0.00990099	8.00795e-24	0.51382	4.83137	FALSE	8788.43	0.232233	0.784817	3.31283	1.52167e-22	Tb427_020020300	FALSE
7235	Tb427-100119600	0	0.00990099	9.24429e-24	0.90262	4.47407	FALSE	15341.4	0.63364	0.499607	1.60828	1.75316e-22	Tb427_100119600	FALSE
4199	Tb427-070052900	0	0.00990099	1.07383e-23	0.989792	4.92325	FALSE	12449.7	0.412338	0.652618	1.73485	2.03252e-22	Tb427_070052900	FALSE
7980	Tb427-110031000	0	0.00990099	1.08868e-23	0.778797	3.96177	FALSE	21016.6	1.58312	0.121466	1.2946	2.0566e-22	Tb427_110031000	FALSE
4157	Tb427-070048700	0	0.00990099	1.313e-23	0.365798	4.96836	FALSE	8893.83	0.23763	0.785209	3.16988	2.47553e-22	Tb427_070048700	FALSE
3420	Tb427-060020000	0	0.00990099	1.52934e-23	0.779166	4.71009	FALSE	5302.6	0.110302	0.892932	5.18771	2.87783e-22	Tb427_060020000	TRUE
5340	Tb427-090008000	0	0.00990099	2.21316e-23	0.638402	4.89587	FALSE	9462.77	0.261956	0.765969	2.80339	4.15654e-22	Tb427_090008000	TRUE
7860	Tb427-110018800	0	0.00990099	2.25002e-23	0.168438	3.67653	FALSE	11736.6	0.376328	0.670942	1.82658	4.21759e-22	Tb427_110018800	FALSE
3619	Tb427-060042600	0	0.00990099	2.32997e-23	0.850428	4.64902	FALSE	5262.18	0.108704	0.895026	3.51118	4.35902e-22	Tb427_060042600	FALSE
6247	Tb427-100016400	0	0.00990099	2.47722e-23	0.687291	4.95299	FALSE	6695.72	0.153616	0.85733	4.87655	4.62558e-22	Tb427_100016400	TRUE
4064	Tb427-070039400	0	0.00990099	3.55907e-23	0.374047	4.82142	FALSE	9688.13	0.270065	0.758508	2.30196	6.63287e-22	Tb427_070039400	TRUE
1849	Tb427-030010200	0	0.00990099	4.14022e-23	0.557415	4.89092	FALSE	11148.5	0.347471	0.686911	1.81531	7.70112e-22	Tb427_030010200	TRUE
5387	Tb427-090013700	0	0.00990099	5.29045e-23	0.884108	4.83025	FALSE	8024.87	0.20042	0.818325	2.88926	9.82179e-22	Tb427_090013700	TRUE
1513	Tb427-010032000	0	0.00990099	5.32562e-23	0.159361	4.90994	FALSE	5763.08	0.123815	0.88377	5.80134	9.86817e-22	Tb427_010032000	TRUE
1645	Tb427-020017800	0	0.00990099	5.39085e-23	0.276117	3.91334	FALSE	17952	0.892164	0.376047	1.32867	9.96999e-22	Tb427_020017800	FALSE
9384	Tb427-110180800	0	0.00990099	6.02018e-23	0.211106	4.82761	FALSE	7334.66	0.175952	0.839136	3.52456	1.11127e-21	Tb427_110180800	TRUE
4880	Tb427-080044700	0	0.00990099	6.42275e-23	0.0581044	4.34931	FALSE	8339.05	0.213221	0.799084	2.06106	1.18333e-21	Tb427_080044700	TRUE
2600	Tb427-040033700	0	0.00990099	7.41686e-23	0.598289	4.89216	FALSE	5255.52	0.108526	0.897382	6.89565	1.36389e-21	Tb427_040033700	TRUE
6640	Tb427-100056700	0	0.00990099	7.60178e-23	0.80899	4.90002	FALSE	7354.95	0.175861	0.834948	4.17413	1.39524e-21	Tb427_100056700	TRUE
6818	Tb427-100076000	0	0.00990099	8.38462e-23	0.224227	4.95939	FALSE	4607.16	0.0896446	0.914529	6.38282	1.53602e-21	Tb427_100076000	TRUE
4906	Tb427-080047300	0	0.00990099	1.08661e-22	0.25073	4.67772	FALSE	6654.14	0.152038	0.856152	3.7536	1.98685e-21	Tb427_080047300	TRUE
6704	Tb427-100063200	0	0.00990099	1.2121e-22	0.279889	4.89411	FALSE	11349	0.352033	0.697906	2.3758	2.21215e-21	Tb427_100063200	FALSE
8172	Tb427-110050600	0	0.00990099	1.29792e-22	0.534141	4.17903	FALSE	8264.1	0.209478	0.805497	2.60616	2.36431e-21	Tb427_110050600	FALSE
5518	Tb427-090028000	0	0.00990099	1.34079e-22	0.613818	4.61773	FALSE	3661.76	0.065992	0.936649	7.49461	2.43782e-21	Tb427_090028000	FALSE
1474	Tb427-010027700	0	0.00990099	1.45155e-22	0.692527	4.69517	FALSE	18967.1	1.06402	0.293194	1.39346	2.63426e-21	Tb427_010027700	FALSE
4862	Tb427-080042900	0	0.00990099	1.6611e-22	0.491067	4.77468	FALSE	9952.86	0.282162	0.746728	2.23198	3.00893e-21	Tb427_080042900	FALSE
7691	Tb427-100168500	0	0.00990099	1.92772e-22	0.875179	4.74288	FALSE	6651.05	0.152342	0.857199	4.60597	3.48536e-21	Tb427_100168500	FALSE
6763	Tb427-100069300	0	0.00990099	2.0252e-22	0.123167	4.21284	FALSE	10637.1	0.317519	0.712827	2.06124	3.65479e-21	Tb427_100069300	FALSE
2418	Tb427-040015500	0	0.00990099	2.02964e-22	0.916734	4.88752	FALSE	7355.79	0.177128	0.835471	3.80317	3.656e-21	Tb427_040015500	FALSE
2681	Tb427-040042400	0.000184095	0.00990099	2.14489e-22	0.311642	2.49867	FALSE	22945.9	2.37052	0.0314136	1.11262	3.85642e-21	Tb427_040042400	FALSE
3585	Tb427-060039200	0	0.00990099	2.25835e-22	0.816509	4.79738	FALSE	6116.63	0.13505	0.871466	5.54299	4.05291e-21	Tb427_060039200	TRUE
8368	Tb427-110070300	0	0.00990099	2.50758e-22	0.907181	4.77896	FALSE	9007.91	0.240598	0.779188	2.17819	4.49187e-21	Tb427_110070300	TRUE
7169	Tb427-100113000	0	0.00990099	3.24806e-22	0.709277	4.18261	FALSE	11431.1	0.36004	0.678927	1.94927	5.80756e-21	Tb427_100113000	FALSE
4231	Tb427-070056100	0	0.00990099	3.25789e-22	0.812534	4.8432	FALSE	8464.7	0.220227	0.79267	2.40692	5.8144e-21	Tb427_070056100	TRUE
8864	Tb427-110127700	0	0.00990099	3.27348e-22	0.00759069	3.50899	FALSE	12370.2	0.415036	0.637304	1.64451	5.83148e-21	Tb427_110127700	TRUE
8773	Tb427-110118600	0	0.00990099	3.71032e-22	0.240408	4.04747	FALSE	19269	1.11747	0.268194	1.38309	6.59756e-21	Tb427_110118600	FALSE
1767	Tb427-020030100	0	0.00990099	4.14038e-22	0.480917	4.55046	FALSE	8567.18	0.222309	0.794895	2.81118	7.3488e-21	Tb427_020030100	FALSE
2989	Tb427-050022200	0	0.00990099	4.20711e-22	0.679214	4.86407	FALSE	8956.07	0.237881	0.780497	1.98405	7.45359e-21	Tb427_050022200	FALSE
6045	Tb427-090083800	0	0.00990099	4.55915e-22	0.817112	4.77515	FALSE	13130.8	0.4562	0.619895	1.68904	8.06255e-21	Tb427_090083800	FALSE
8625	Tb427-110096100	0	0.00990099	4.98981e-22	0.842729	4.84765	FALSE	10595	0.313328	0.723691	2.23829	8.80807e-21	Tb427_110096100	TRUE
2274	Tb427-030056400	0	0.00990099	5.04924e-22	0.43285	4.72886	FALSE	7684.28	0.186456	0.827225	2.76343	8.89676e-21	Tb427_030056400	FALSE
6614	Tb427-100054100	0	0.00990099	5.29433e-22	0.570184	4.36447	FALSE	11922.5	0.388517	0.656414	1.66098	9.31168e-21	Tb427_100054100	FALSE
8743	Tb427-110109100	0	0.00990099	6.22228e-22	0.821296	4.44563	FALSE	12908.5	0.441824	0.62788	1.6474	1.09239e-20	Tb427_110109100	FALSE
9294	Tb427-110171600	0	0.00990099	6.55068e-22	0.776796	4.24459	FALSE	8133.56	0.204502	0.808639	2.57123	1.14797e-20	Tb427_110171600	FALSE
6034	Tb427-090082700	0	0.00990099	6.93558e-22	0.704505	4.79798	FALSE	13473.3	0.489098	0.58678	1.67159	1.21323e-20	Tb427_090082700	FALSE
6346	Tb427-100026700	0	0.00990099	7.70562e-22	0.851958	4.48546	FALSE	14293.9	0.539274	0.561649	1.45401	1.3455e-20	Tb427_100026700	FALSE
1647	Tb427-020018000	0	0.00990099	7.82101e-22	0.249436	4.91683	FALSE	8036.84	0.202015	0.811911	4.12653	1.36319e-20	Tb427_020018000	FALSE
1836	Tb427-030008900	0	0.00990099	8.1713e-22	0.466169	4.75762	FALSE	8137.2	0.203909	0.81322	2.47954	1.42169e-20	Tb427_030008900	FALSE
4207	Tb427-070053700	0	0.00990099	8.46381e-22	0.573149	4.86623	FALSE	4898.87	0.0974836	0.908377	4.11433	1.46994e-20	Tb427_070053700	TRUE
2454	Tb427-040019100	0	0.00990099	8.97884e-22	0.812785	4.54319	FALSE	11878.4	0.383827	0.664267	1.70986	1.5566e-20	Tb427_040019100	FALSE
7508	Tb427-100148300	0	0.00990099	9.49958e-22	0.343819	4.76355	FALSE	11697.9	0.374479	0.670157	2.20498	1.64394e-20	Tb427_100148300	TRUE
7047	Tb427-100099600	0	0.00990099	9.85299e-22	0.506098	4.87252	FALSE	8861.67	0.231994	0.790838	2.47927	1.70206e-20	Tb427_100099600	TRUE
5526	Tb427-090028800	0	0.00990099	1.07954e-21	0.890897	4.79013	FALSE	16616.4	0.763144	0.42212	1.49789	1.86154e-20	Tb427_090028800	FALSE
6196	Tb427-100011200	0	0.00990099	1.08555e-21	0.924961	4.59198	FALSE	10677.4	0.315195	0.723298	2.20981	1.86856e-20	Tb427_100011200	FALSE
3268	Tb427-050052300	0	0.00990099	1.12316e-21	0.342741	4.86201	FALSE	3819.49	0.0698031	0.934031	6.97833	1.92988e-20	Tb427_050052300	FALSE
5094	Tb427-080066800	0	0.00990099	1.23717e-21	0.254932	4.48513	FALSE	19410.2	1.17204	0.239267	1.2162	2.12202e-20	Tb427_080066800	FALSE
1868	Tb427-030012100	0	0.00990099	1.59021e-21	0.383729	4.77333	FALSE	10737.3	0.319955	0.715445	2.13455	2.72275e-20	Tb427_030012100	FALSE
4444	Tb427-070078500	0	0.00990099	1.64292e-21	0.27171	4.41605	FALSE	20122	1.34459	0.180366	1.27069	2.80803e-20	Tb427_070078500	FALSE
9058	Tb427-110147800	0	0.00990099	1.78097e-21	0.628898	4.39431	FALSE	9238.85	0.252115	0.766099	2.357	3.03862e-20	Tb427_110147800	FALSE
7275	Tb427-100124100	0	0.00990099	3.32545e-21	0.475025	4.59854	FALSE	9234.4	0.250475	0.769503	2.68526	5.66378e-20	Tb427_100124100	FALSE
4616	Tb427-080017700	0	0.00990099	3.37512e-21	0.0716063	4.73257	FALSE	7742.67	0.189273	0.820419	1.99286	5.7383e-20	Tb427_080017700	FALSE
1482	Tb427-010028500	0	0.00990099	3.41578e-21	0.748268	4.73005	FALSE	9943.48	0.280162	0.74856	1.80642	5.79725e-20	Tb427_010028500	TRUE
3991	Tb427-070030300	0	0.00990099	5.39398e-21	0.616014	4.87566	FALSE	10344.4	0.299948	0.731152	2.3241	9.13864e-20	Tb427_070030300	TRUE
5516	Tb427-090027800	0	0.00990099	8.27722e-21	0.28788	4.53087	FALSE	7926.78	0.197935	0.815707	3.07687	1.3999e-19	Tb427_090027800	FALSE
7638	Tb427-100162000	0	0.00990099	1.04772e-20	0.329971	4.83786	FALSE	12308	0.408423	0.646597	1.74412	1.7689e-19	Tb427_100162000	TRUE
3245	Tb427-050048400	0	0.00990099	1.04978e-20	0.917	4.67083	FALSE	8141.9	0.205145	0.808246	2.37643	1.76929e-19	Tb427_050048400	TRUE
6262	Tb427-100017900	0	0.00990099	1.19425e-20	0.336493	3.28096	FALSE	21809.4	1.78236	0.1	1.16238	2.00929e-19	Tb427_100017900	FALSE
2770	Tb427-040051900	0	0.00990099	1.21365e-20	0.226708	4.7411	FALSE	6241.82	0.138541	0.872906	3.47406	2.03838e-19	Tb427_040051900	FALSE
3320	Tb427-060009600	0	0.00990099	1.42392e-20	0.239554	3.36121	FALSE	15113	0.617877	0.50301	1.51965	2.3874e-19	Tb427_060009600	FALSE
5792	Tb427-090056000	0	0.00990099	1.5076e-20	0.818678	4.55783	FALSE	6477.14	0.144818	0.860733	2.46762	2.52334e-19	Tb427_090056000	FALSE
4079	Tb427-070040900	0	0.00990099	1.63201e-20	0.422282	4.57599	FALSE	15826.7	0.680562	0.466754	1.3463	2.72687e-19	Tb427_070040900	FALSE
6842	Tb427-100078400	0	0.00990099	1.64047e-20	0.0982644	4.70463	FALSE	8336.8	0.212904	0.801309	1.95001	2.73158e-19	Tb427_100078400	FALSE
7581	Tb427-100155600	0	0.00990099	1.63985e-20	0.795179	4.45036	FALSE	12760.8	0.437459	0.624084	1.49976	2.73158e-19	Tb427_100155600	FALSE
2871	Tb427-050010000	0	0.00990099	2.03299e-20	0.94158	4.85299	FALSE	8523.92	0.219132	0.8	2.57747	3.37937e-19	Tb427_050010000	TRUE
5969	Tb427-090076200	0	0.00990099	2.07316e-20	0.605453	4.90505	FALSE	10069.5	0.287332	0.745812	2.40435	3.44023e-19	Tb427_090076200	FALSE
8907	Tb427-110132300	0	0.00990099	2.32525e-20	0.135379	4.72008	FALSE	6831.45	0.155988	0.855105	2.49939	3.85196e-19	Tb427_110132300	TRUE
1977	Tb427-030023000	0	0.00990099	2.68743e-20	0.760867	4.30811	FALSE	9166.75	0.246132	0.772513	2.16317	4.44434e-19	Tb427_030023000	FALSE
8117	Tb427-110045000	0	0.00990099	2.86929e-20	0.344689	4.75904	FALSE	6687.4	0.152049	0.856414	3.77043	4.73702e-19	Tb427_110045000	FALSE
8750	Tb427-110109800	0	0.00990099	3.46568e-20	0.474716	4.31631	FALSE	10637.8	0.316199	0.714398	1.58103	5.71189e-19	Tb427_110109800	FALSE
5679	Tb427-090044700	0	0.00990099	3.86427e-20	0.470874	4.07014	FALSE	17655.6	0.873767	0.374607	1.4138	6.358e-19	Tb427_090044700	FALSE
8313	Tb427-110064800	0	0.00990099	4.13148e-20	0.252384	4.86756	FALSE	5266.91	0.108623	0.898429	4.11295	6.78614e-19	Tb427_110064800	TRUE
4415	Tb427-070075000	0	0.00990099	4.40626e-20	0.294807	4.78476	FALSE	7928.41	0.196321	0.818586	3.06328	7.22523e-19	Tb427_070075000	TRUE
1380	Tb427-010016100	0	0.00990099	4.7863e-20	0.863089	4.7899	FALSE	17658	0.873367	0.375	1.31448	7.83514e-19	Tb427_010016100	FALSE
9418	Tb427-110184300	0	0.00990099	4.99698e-20	0.545256	3.9072	FALSE	15595.5	0.645221	0.497906	1.37737	8.16623e-19	Tb427_110184300	FALSE
6225	Tb427-100014200	0	0.00990099	5.29294e-20	0.450941	4.7422	FALSE	6608.03	0.148899	0.862173	2.80569	8.63533e-19	Tb427_100014200	TRUE
6750	Tb427-100068000	0	0.00990099	7.05168e-20	0.330917	4.45072	FALSE	11349.3	0.355245	0.683508	2.0952	1.14853e-18	Tb427_100068000	FALSE
2541	Tb427-040027800	5.71162e-05	0.00990099	7.48762e-20	0.241487	2.61698	FALSE	22791.1	2.38816	0.0264398	1.10609	1.21749e-18	Tb427_040027800	FALSE
8835	Tb427-110124800	0	0.00990099	7.79249e-20	0.733655	4.77035	FALSE	9453.78	0.259328	0.767016	2.83677	1.26494e-18	Tb427_110124800	FALSE
3814	Tb427-070011600	0	0.00990099	7.94856e-20	0.787608	4.68721	FALSE	10644.3	0.315039	0.719372	1.79059	1.28812e-18	Tb427_070011600	FALSE
9154	Tb427-110157600	0	0.00990099	8.70006e-20	0.846198	4.79486	FALSE	6607.87	0.150445	0.85733	4.08624	1.40755e-18	Tb427_110157600	FALSE
1740	Tb427-020027400	0	0.00990099	9.71124e-20	0.0556385	3.78788	FALSE	14681.6	0.580006	0.52356	1.50019	1.56853e-18	Tb427_020027400	TRUE
8792	Tb427-110120500	0	0.00990099	1.28242e-19	0.0211758	4.4756	FALSE	6700.48	0.152985	0.853534	3.25372	2.06788e-18	Tb427_110120500	TRUE
1631	Tb427-020016400	0	0.00990099	1.29916e-19	0.543768	4.3472	FALSE	11964.4	0.387531	0.665314	2.02187	2.09139e-18	Tb427_020016400	FALSE
4673	Tb427-080023700	0	0.00990099	1.42926e-19	0.905832	4.87224	FALSE	9422.21	0.258116	0.761911	1.97683	2.29701e-18	Tb427_080023700	FALSE
4344	Tb427-070067600	0	0.00990099	1.45712e-19	0.133394	4.72374	FALSE	15729.7	0.65808	0.494503	1.68535	2.3379e-18	Tb427_070067600	FALSE
6755	Tb427-100068500	0	0.00990099	1.59343e-19	0.0556325	4.74098	FALSE	10608.4	0.314369	0.718717	2.07685	2.55239e-18	Tb427_100068500	FALSE
4471	Tb427-070081200	0	0.00990099	1.7051e-19	0.864459	4.64373	FALSE	13580.6	0.492211	0.589136	1.66687	2.72675e-18	Tb427_070081200	FALSE
4131	Tb427-070046100	0	0.00990099	1.84914e-19	0.0829676	4.42161	FALSE	20273.3	1.40915	0.158508	1.2103	2.95222e-18	Tb427_070046100	FALSE
6320	Tb427-100023700:pseudogene	0	0.00990099	1.91149e-19	0.733058	4.67196	FALSE	12456.9	0.414887	0.64555	1.83418	3.04675e-18	Tb427_100023700:pseudogene	FALSE
6537	Tb427-100046300	0	0.00990099	1.91902e-19	0.856358	4.31511	FALSE	8819.25	0.231305	0.787696	2.34514	3.05373e-18	Tb427_100046300	FALSE
5894	Tb427-090066600	0	0.00990099	2.01789e-19	0.777745	4.85143	FALSE	5817.67	0.124304	0.88233	5.10069	3.2058e-18	Tb427_090066600	TRUE
8491	Tb427-110082600	0	0.00990099	2.05319e-19	0.493683	4.37465	FALSE	10983.1	0.331762	0.705759	1.5876	3.25654e-18	Tb427_110082600	FALSE
2455	Tb427-040019200	0	0.00990099	2.23645e-19	0.0225719	4.86865	FALSE	9425.23	0.256184	0.768717	1.98849	3.54141e-18	Tb427_040019200	FALSE
2800	Tb427-040054900	0	0.00990099	2.28662e-19	0.0826653	4.90258	FALSE	5224.29	0.106746	0.900393	4.40502	3.61495e-18	Tb427_040054900	FALSE
1489	Tb427-010029200	0	0.00990099	2.33185e-19	0.807344	4.17694	FALSE	10675.4	0.31722	0.71466	1.87435	3.68045e-18	Tb427_010029200	FALSE
1279	Tb427-010005900	0	0.00990099	2.4347e-19	0.649496	4.92099	FALSE	4795.23	0.094987	0.910079	4.22296	3.83653e-18	Tb427_010005900	FALSE
4991	Tb427-080056500	0.0043415	0.00990099	2.98831e-19	0.232418	3.17001	FALSE	23853.2	2.89889	0.00968586	1.07863	4.70125e-18	Tb427_080056500	FALSE
4094	Tb427-070042400	0	0.00990099	3.31544e-19	0.153858	4.81054	FALSE	15381.6	0.628037	0.508115	1.60036	5.20745e-18	Tb427_070042400	FALSE
5687	Tb427-090045500	0	0.00990099	3.38524e-19	0.337714	4.47712	FALSE	12290.5	0.405271	0.650393	1.60838	5.30847e-18	Tb427_090045500	FALSE
3929	Tb427-070023900	0	0.00990099	3.65796e-19	0.276134	4.82858	FALSE	11962	0.387145	0.662827	1.99886	5.72686e-18	Tb427_070023900	FALSE
6859	Tb427-100080100	3.71054e-07	0.00990099	3.71938e-19	0.508221	3.95342	FALSE	21655.2	1.82994	0.0767016	1.13687	5.81362e-18	Tb427_100080100	FALSE
8616	Tb427-110095200	0	0.00990099	3.92784e-19	0.465378	4.66715	FALSE	7852.26	0.192305	0.821859	2.41468	6.12958e-18	Tb427_110095200	FALSE
6972	Tb427-100092100	0	0.00990099	4.01433e-19	0.273475	4.17039	FALSE	21019.7	1.55173	0.134686	1.2408	6.25448e-18	Tb427_100092100	FALSE
8904	Tb427-110132000	0	0.00990099	5.81495e-19	0.320684	4.78955	FALSE	12424.8	0.415295	0.643717	1.86669	9.04538e-18	Tb427_110132000	TRUE
3899	Tb427-070020300	0	0.00990099	5.96138e-19	0.790892	4.93112	FALSE	7395.78	0.175743	0.835209	2.19005	9.25828e-18	Tb427_070020300	FALSE
5344	Tb427-090008400	0	0.00990099	6.11476e-19	0.35362	4.10406	FALSE	13214.6	0.467072	0.604188	1.48974	9.4813e-18	Tb427_090008400	TRUE
8581	Tb427-110091600	0	0.00990099	6.22352e-19	0.27751	4.69711	FALSE	7248.44	0.171048	0.837696	3.14876	9.63452e-18	Tb427_110091600	TRUE
5830	Tb427-090059800	0	0.00990099	7.47268e-19	0.147009	4.83264	FALSE	11286.8	0.349756	0.693194	1.93056	1.15499e-17	Tb427_090059800	FALSE
3056	Tb427-050029500	0	0.00990099	7.77789e-19	0.376466	4.47715	FALSE	10483.6	0.307573	0.724084	1.8672	1.20025e-17	Tb427_050029500	FALSE
7639	Tb427-100162100	0	0.00990099	8.75865e-19	0.921541	4.87622	FALSE	18390.3	0.984284	0.320681	1.31909	1.34944e-17	Tb427_100162100	FALSE
9317	Tb427-110173900	0	0.00990099	9.51766e-19	0.636567	4.75245	FALSE	8581.91	0.220805	0.796466	2.06691	1.46406e-17	Tb427_110173900	FALSE
3966	Tb427-070027800	0	0.00990099	1.05847e-18	0.437769	4.78717	FALSE	8486.18	0.218278	0.796728	2.11455	1.62562e-17	Tb427_070027800	FALSE
4098	Tb427-070042800	0	0.00990099	1.34081e-18	0.903496	4.62168	FALSE	11193.8	0.346684	0.686649	1.5219	2.05598e-17	Tb427_070042800	FALSE
7292	Tb427-100125800	0	0.00990099	1.64885e-18	0.867992	4.87385	FALSE	6725.34	0.152434	0.860602	4.42652	2.52432e-17	Tb427_100125800	FALSE
2167	Tb427-030045000	0	0.00990099	1.806e-18	0.347683	4.1328	FALSE	15311.3	0.626195	0.50445	1.32494	2.76055e-17	Tb427_030045000	FALSE
1642	Tb427-020017500	0	0.00990099	1.82602e-18	0.902564	4.92425	FALSE	15872.1	0.682283	0.46911	1.5289	2.78676e-17	Tb427_020017500	FALSE
7138	Tb427-100108700	0	0.00990099	1.97665e-18	0.536679	4.94471	FALSE	11148.5	0.336275	0.711518	1.99413	3.01191e-17	Tb427_100108700	FALSE
6939	Tb427-100088200	0	0.00990099	2.08224e-18	0.0469227	4.93786	FALSE	9371.76	0.256853	0.765969	2.50062	3.16782e-17	Tb427_100088200	FALSE
5758	Tb427-090052600	0	0.00990099	2.2532e-18	0.144841	4.90255	FALSE	19246.6	1.1444	0.250131	1.35549	3.42253e-17	Tb427_090052600	FALSE
7976	Tb427-110030600	0	0.00990099	2.26198e-18	0.804854	4.74957	FALSE	10349.6	0.301584	0.724869	1.7558	3.43049e-17	Tb427_110030600	TRUE
2029	Tb427-030029500	0	0.00990099	2.3654e-18	0.0397772	3.84148	FALSE	9291.79	0.252508	0.766885	2.03004	3.58174e-17	Tb427_030029500	TRUE
1451	Tb427-010024600	0	0.00990099	2.53746e-18	0.999355	4.64693	FALSE	10351.3	0.300737	0.72945	1.81956	3.83627e-17	Tb427_010024600	TRUE
2547	Tb427-040028400	0	0.00990099	2.56888e-18	0.0641188	4.92042	FALSE	9234.67	0.249123	0.77212	1.89717	3.87773e-17	Tb427_040028400	FALSE
5256	Tb427-080083400	0	0.00990099	2.61956e-18	0.373844	4.25823	FALSE	10179.7	0.292896	0.733115	1.68018	3.93583e-17	Tb427_080083400	FALSE
6911	Tb427-100085400	0	0.00990099	2.61924e-18	0.994924	4.08648	FALSE	12521	0.421951	0.636126	1.58715	3.93583e-17	Tb427_100085400	FALSE
2594	Tb427-040033100	1.31224e-06	0.00990099	2.61928e-18	0.421961	1.0006	FALSE	21894.2	1.8852	0.0763089	1.15046	3.93583e-17	Tb427_040033100	FALSE
8126	Tb427-110045900	0	0.00990099	3.24855e-18	0.400165	4.68475	FALSE	11980.8	0.385566	0.670026	2.11714	4.86579e-17	Tb427_110045900	FALSE
5133	Tb427-080070700	0	0.00990099	3.24512e-18	0.728823	4.72024	FALSE	9063.03	0.241875	0.777225	2.00791	4.86579e-17	Tb427_080070700	FALSE
7387	Tb427-100135400	0	0.00990099	3.80341e-18	0.534097	4.85362	FALSE	10579.7	0.311797	0.722775	1.82041	5.68809e-17	Tb427_100135400	FALSE
2509	Tb427-040024600	0	0.00990099	3.83145e-18	0.804341	4.87769	FALSE	16404.7	0.740346	0.433377	1.60455	5.72119e-17	Tb427_040024600	FALSE
2460	Tb427-040019700	0	0.00990099	4.00987e-18	0.546115	3.63298	FALSE	9141.39	0.246607	0.771073	2.07493	5.97841e-17	Tb427_040019700	FALSE
6634	Tb427-100056100	0	0.00990099	4.16492e-18	0.737509	4.79233	FALSE	12426.1	0.414904	0.644241	1.81357	6.20004e-17	Tb427_100056100	FALSE
5616	Tb427-090038100	0	0.00990099	4.51438e-18	0.569688	4.32148	FALSE	10783	0.319717	0.718194	1.82309	6.70995e-17	Tb427_090038100	FALSE
3428	Tb427-060020800:pseudogene	0	0.00990099	4.66147e-18	0.534442	4.90695	FALSE	15767.5	0.667961	0.481806	1.51205	6.91796e-17	Tb427_060020800:pseudogene	FALSE
6444	Tb427-100037000	0	0.00990099	4.77145e-18	0.520079	4.41552	FALSE	16606.1	0.747409	0.44123	1.38433	7.07036e-17	Tb427_100037000	FALSE
6518	Tb427-100044400	0.00481492	0.00990099	5.07984e-18	0.390462	1.00053	FALSE	24501.2	3.42633	0.0013089	1.0623	7.51583e-17	Tb427_100044400	FALSE
1693	Tb427-020022600	6.662e-05	0.00990099	5.77076e-18	0.991264	3.42718	FALSE	22179.4	2.0325	0.0570681	1.15592	8.52506e-17	Tb427_020022600	FALSE
8317	Tb427-110065200	0	0.00990099	5.93016e-18	0.684959	4.54004	FALSE	4920.75	0.0978693	0.90589	4.60421	8.74722e-17	Tb427_110065200	FALSE
7066	Tb427-100101500	0	0.00990099	6.86411e-18	0.421726	4.46423	FALSE	16902.4	0.779338	0.422382	1.44346	1.01094e-16	Tb427_100101500	FALSE
9272	Tb427-110169400	0	0.00990099	6.875e-18	0.495506	4.82636	FALSE	3354.36	0.0585913	0.944372	8.29543	1.01101e-16	Tb427_110169400	TRUE
7888	Tb427-110021700	0	0.00990099	1.02623e-17	0.965711	4.50589	FALSE	10511.3	0.307695	0.725654	1.92395	1.50685e-16	Tb427_110021700	FALSE
2629	Tb427-040037000	0	0.00990099	1.11401e-17	0.977004	4.83529	FALSE	7325.55	0.173273	0.839791	2.9422	1.63326e-16	Tb427_040037000	FALSE
3523	Tb427-060033000	0.000148341	0.00990099	1.17515e-17	0.588883	2.53467	FALSE	22526.1	2.22179	0.0346859	1.10211	1.72029e-16	Tb427_060033000	FALSE
5955	Tb427-090074800	0	0.00990099	1.18006e-17	0.8881	2.7583	FALSE	13785.7	0.502587	0.584031	1.48743	1.72488e-16	Tb427_090074800	FALSE
3022	Tb427-050025700	0	0.00990099	1.25674e-17	0.238657	4.05386	FALSE	7339.71	0.173584	0.835995	1.96418	1.83419e-16	Tb427_050025700	TRUE
3311	Tb427-060008700:pseudogene	0	0.00990099	1.31398e-17	0.794932	4.97102	FALSE	7267.97	0.167995	0.857984	3.01911	1.91486e-16	Tb427_060008700:pseudogene	FALSE
2139	Tb427-030042000	0	0.00990099	1.37601e-17	0.589192	4.88465	FALSE	5073.71	0.10269	0.900654	3.70677	2.00223e-16	Tb427_030042000	TRUE
2519	Tb427-040025600	0	0.00990099	1.40026e-17	0.883866	4.94259	FALSE	14638.7	0.570802	0.536518	1.53825	2.03448e-16	Tb427_040025600	FALSE
8404	Tb427-110073900	0	0.00990099	1.51505e-17	0.501699	4.87484	FALSE	8015.95	0.199253	0.818717	2.55491	2.19795e-16	Tb427_110073900	FALSE
2178	Tb427-030046300	0	0.00990099	1.74199e-17	0.0218105	4.65954	FALSE	7261.92	0.172037	0.835602	2.19607	2.52341e-16	Tb427_030046300	FALSE
1862	Tb427-030011500	0	0.00990099	1.76035e-17	0.485188	4.38099	FALSE	8135.76	0.203735	0.809555	2.20969	2.5462e-16	Tb427_030011500	FALSE
3690	Tb427-060050300	0	0.00990099	1.76748e-17	0.208383	4.07096	FALSE	13663.5	0.496283	0.585471	1.5041	2.55271e-16	Tb427_060050300	FALSE
1327	Tb427-010010700	0	0.00990099	1.77471e-17	0.639934	3.96615	FALSE	14084.5	0.525616	0.56767	1.5373	2.55933e-16	Tb427_010010700	TRUE
1683	Tb427-020021600	0	0.00990099	1.89574e-17	0.394224	4.58346	FALSE	15704.9	0.664655	0.479188	1.42451	2.7298e-16	Tb427_020021600	FALSE
5699	Tb427-090046700	0	0.00990099	2.07107e-17	0.252031	4.49551	FALSE	13771.9	0.503688	0.584162	1.51833	2.97786e-16	Tb427_090046700	FALSE
2565	Tb427-040030200	0	0.00990099	2.28911e-17	0.442294	4.74056	FALSE	6453.69	0.144229	0.866492	3.07442	3.28648e-16	Tb427_040030200	TRUE
2263	Tb427-030055300	4.12025e-06	0.00990099	2.60921e-17	0.68664	3.62394	FALSE	22123.7	1.90328	0.0823298	1.16481	3.74052e-16	Tb427_030055300	FALSE
8622	Tb427-110095800	0	0.00990099	2.79321e-17	0.0520878	4.83652	FALSE	6033.61	0.131529	0.878272	3.90162	3.99837e-16	Tb427_110095800	TRUE
8961	Tb427-110137800	0	0.00990099	2.93817e-17	0.471503	4.01063	FALSE	17935.2	0.909218	0.355628	1.3097	4.19968e-16	Tb427_110137800	FALSE
3997	Tb427-070030900	0	0.00990099	3.09089e-17	0.320413	3.87181	FALSE	19997.8	1.32067	0.186649	1.26219	4.41147e-16	Tb427_070030900	FALSE
7223	Tb427-100118400	0	0.00990099	4.22522e-17	0.744578	4.9165	FALSE	8053.15	0.200523	0.814791	2.5452	6.02156e-16	Tb427_100118400	FALSE
8088	Tb427-110042100	0	0.00990099	4.54142e-17	0.83062	3.96042	FALSE	20515.9	1.40196	0.176309	1.26298	6.46268e-16	Tb427_110042100	FALSE
5125	Tb427-080069900	0	0.00990099	4.98585e-17	0.950048	4.85248	FALSE	9004.26	0.239182	0.784555	2.57201	7.08473e-16	Tb427_080069900	TRUE
4401	Tb427-070073400	0	0.00990099	5.79305e-17	0.408669	4.82341	FALSE	8597.01	0.221316	0.798168	2.22961	8.21969e-16	Tb427_070073400	FALSE
2459	Tb427-040019600	0	0.00990099	6.459e-17	0.38296	4.24462	FALSE	4077.67	0.0755505	0.926832	3.20972	9.15119e-16	Tb427_040019600	FALSE
7540	Tb427-100151500	0	0.00990099	6.48825e-17	0.984754	4.71651	FALSE	9674.88	0.269147	0.75445	2.50161	9.17922e-16	Tb427_100151500	FALSE
9382	Tb427-110180600	0	0.00990099	7.10511e-17	0.956302	4.7861	FALSE	7907.56	0.195285	0.817932	2.32955	1.00373e-15	Tb427_110180600	TRUE
9257	Tb427-110167900	5.57028e-06	0.00990099	7.78977e-17	0.855489	4.83374	FALSE	21337.4	1.65003	0.116099	1.16552	1.09884e-15	Tb427_110167900	FALSE
7029	Tb427-100097800	0	0.00990099	7.82995e-17	0.802056	4.85074	FALSE	6900.74	0.158246	0.852356	2.74075	1.10291e-15	Tb427_100097800	TRUE
8185	Tb427-110051900	0.0454349	0.00990099	8.54237e-17	0.216347	4.2326	FALSE	23252.7	2.53645	0.0184555	1.09633	1.20151e-15	Tb427_110051900	FALSE
6186	Tb427-100010200	0	0.00990099	8.6873e-17	0.546521	4.75854	FALSE	9282.24	0.250158	0.770288	1.73892	1.22012e-15	Tb427_100010200	TRUE
3020	Tb427-050025500	0	0.00990099	8.72592e-17	0.343818	4.83671	FALSE	7949.63	0.19587	0.823168	2.73204	1.22377e-15	Tb427_050025500	FALSE
9104	Tb427-110152600	0	0.00990099	8.81949e-17	0.283144	4.6079	FALSE	9043.5	0.242106	0.775131	1.86562	1.23511e-15	Tb427_110152600	FALSE
6991	Tb427-100094000	0	0.00990099	9.47195e-17	0.252407	4.43414	FALSE	16445.8	0.744565	0.429188	1.34684	1.32457e-15	Tb427_100094000	FALSE
7624	Tb427-100160600	0	0.00990099	1.07283e-16	0.892701	4.79593	FALSE	8376.01	0.213887	0.800916	2.90449	1.49809e-15	Tb427_100160600	FALSE
1303	Tb427-010008300	0	0.00990099	1.08109e-16	0.391392	4.77221	FALSE	8792.68	0.231186	0.785602	1.91082	1.50746e-15	Tb427_010008300	FALSE
4958	Tb427-080052900	0	0.00990099	1.22742e-16	0.454804	3.9354	FALSE	15264.5	0.624399	0.503403	1.53678	1.70904e-15	Tb427_080052900	FALSE
6358	Tb427-100027900	0	0.00990099	1.45413e-16	0.0889311	4.13319	FALSE	17944.3	0.93493	0.330497	1.28464	2.0218e-15	Tb427_100027900	FALSE
5106	Tb427-080068000	0	0.00990099	1.79425e-16	0.793579	4.53039	FALSE	12572	0.424853	0.631283	1.52446	2.49112e-15	Tb427_080068000	FALSE
2486	Tb427-040022300	0	0.00990099	1.92621e-16	0.890562	4.69388	FALSE	17370.1	0.84495	0.380497	1.38661	2.67051e-15	Tb427_040022300	FALSE
6779	Tb427-100070900	0	0.00990099	1.96977e-16	0.38565	4.96411	FALSE	11969.9	0.384861	0.669895	1.95453	2.727e-15	Tb427_100070900	FALSE
4301	Tb427-070063100	0	0.00990099	2.05889e-16	0.12716	4.77074	FALSE	5926.91	0.128378	0.877225	4.58586	2.84632e-15	Tb427_070063100	TRUE
3729	Tb427-060054700	0	0.00990099	2.07399e-16	0.68676	4.66046	FALSE	12538.5	0.42247	0.636387	1.75096	2.86311e-15	Tb427_060054700	FALSE
8863	Tb427-110127600	0	0.00990099	2.10149e-16	0.206111	4.51173	FALSE	8478.66	0.217282	0.797251	1.86121	2.89695e-15	Tb427_110127600	TRUE
5074	Tb427-080064800	0	0.00990099	2.22783e-16	0.960146	3.4538	FALSE	8035.08	0.199824	0.81178	1.95637	3.06675e-15	Tb427_080064800	FALSE
6792	Tb427-100072200	0	0.00990099	2.35868e-16	0.281777	4.72816	FALSE	3838.95	0.0692617	0.93377	6.228	3.24227e-15	Tb427_100072200	FALSE
8273	Tb427-110060800	0	0.00990099	2.5287e-16	0.674994	4.87283	FALSE	5030.4	0.101587	0.903141	5.91851	3.47105e-15	Tb427_110060800	TRUE
5785	Tb427-090055300	0	0.00990099	2.59054e-16	0.18178	3.57568	FALSE	10109.8	0.289883	0.735471	1.86865	3.5509e-15	Tb427_090055300	FALSE
8478	Tb427-110081300	0	0.00990099	2.69461e-16	0.616007	4.75984	FALSE	6275.69	0.137449	0.868586	2.84284	3.68834e-15	Tb427_110081300	FALSE
7628	Tb427-100161000	0	0.00990099	2.81327e-16	0.743007	4.74627	FALSE	10529.3	0.310739	0.71767	1.80886	3.84534e-15	Tb427_100161000	FALSE
7497	Tb427-100147000	0	0.00990099	3.07464e-16	0.0110169	4.77025	FALSE	6300.54	0.139618	0.866492	3.53974	4.19667e-15	Tb427_100147000	FALSE
8758	Tb427-110110600	0	0.00990099	3.29529e-16	0.21522	4.60999	FALSE	10705.4	0.319398	0.713482	1.71907	4.49151e-15	Tb427_110110600	FALSE
3033	Tb427-050026800	0	0.00990099	3.32259e-16	0.769259	4.92914	FALSE	4963.31	0.0987682	0.906675	5.85426	4.52237e-15	Tb427_050026800	FALSE
7143	Tb427-100109200	0	0.00990099	3.81493e-16	0.814898	4.67037	FALSE	22630.9	1.71853	0.147644	1.24367	5.1852e-15	Tb427_100109200	TRUE
7067	Tb427-100101600	0	0.00990099	3.84717e-16	0.861834	4.71309	FALSE	17587.7	0.857434	0.384031	1.35752	5.2217e-15	Tb427_100101600	FALSE
7675	Tb427-100165700	0	0.00990099	4.15778e-16	0.11099	4.37413	FALSE	13453.7	0.482515	0.592277	1.37715	5.6354e-15	Tb427_100165700	TRUE
5350	Tb427-090009000	0	0.00990099	4.17599e-16	0.305082	4.15912	FALSE	12857.7	0.439922	0.62801	1.55648	5.65216e-15	Tb427_090009000	FALSE
5555	Tb427-090031700	0.00101318	0.00990099	4.58435e-16	0.770853	4.11065	FALSE	21443.8	1.74415	0.090445	1.12047	6.19623e-15	Tb427_090031700	FALSE
7437	Tb427-100140400	0	0.00990099	4.5927e-16	0.626796	4.68433	FALSE	9046.91	0.23964	0.784555	2.21864	6.19886e-15	Tb427_100140400	FALSE
7892	Tb427-110022100	0	0.00990099	4.81782e-16	0.979841	4.30166	FALSE	13904.3	0.513963	0.572906	1.53007	6.49367e-15	Tb427_110022100	FALSE
4247	Tb427-070057700	0	0.00990099	5.21628e-16	0.856554	4.33096	FALSE	8241.39	0.206989	0.808508	2.12232	7.02096e-15	Tb427_070057700	FALSE
4517	Tb427-080005700	0	0.00990099	5.5555e-16	0.836184	2.42072	FALSE	11067.4	0.335008	0.703927	1.65689	7.46717e-15	Tb427_080005700	FALSE
4860	Tb427-080042700	0	0.00990099	5.59311e-16	0.301945	4.53578	FALSE	9542.14	0.262051	0.76322	1.76597	7.50732e-15	Tb427_080042700	FALSE
2340	Tb427-040007700	0	0.00990099	7.21784e-16	0.412071	4.78073	FALSE	4529.4	0.0863842	0.917932	3.36663	9.66134e-15	Tb427_040007700	FALSE
2175	Tb427-030045800	0	0.00990099	7.21345e-16	0.883023	4.94048	FALSE	14331.4	0.544411	0.554974	1.50201	9.66134e-15	Tb427_030045800	FALSE
6990	Tb427-100093900	0	0.00990099	7.55267e-16	0.315331	3.99296	FALSE	7513.37	0.180493	0.827225	2.205	1.00956e-14	Tb427_100093900	FALSE
4364	Tb427-070069600	0	0.00990099	7.89718e-16	0.641567	4.57434	FALSE	7761.8	0.189526	0.82212	2.64447	1.05415e-14	Tb427_070069600	FALSE
4482	Tb427-070082300	0	0.00990099	8.74382e-16	0.689125	4.15307	FALSE	14384.1	0.550809	0.54856	1.40662	1.16556e-14	Tb427_070082300	TRUE
7311	Tb427-100127700	0	0.00990099	1.0115e-15	0.714525	4.8627	FALSE	12331.5	0.406908	0.65301	2.2143	1.3465e-14	Tb427_100127700	TRUE
8874	Tb427-110128700	0	0.00990099	1.03035e-15	0.885524	4.64584	FALSE	7566.75	0.180744	0.834031	2.34422	1.3697e-14	Tb427_110128700	FALSE
2303	Tb427-030059300	0	0.00990099	1.04145e-15	0.166435	4.8004	FALSE	12777.3	0.435813	0.627094	1.60045	1.38256e-14	Tb427_030059300	FALSE
4294	Tb427-070062400	0	0.00990099	1.05596e-15	0.187486	4.56762	FALSE	8337.99	0.211973	0.801963	2.41767	1.3999e-14	Tb427_070062400	TRUE
3189	Tb427-050042800	0	0.00990099	1.45354e-15	0.620757	4.12957	FALSE	5893.4	0.12597	0.878796	2.93502	1.92435e-14	Tb427_050042800	FALSE
5370	Tb427-090012000	0	0.00990099	1.52639e-15	0.87191	4.69303	FALSE	7129.02	0.166053	0.843586	2.89386	2.01804e-14	Tb427_090012000	FALSE
7828	Tb427-110015600:pseudogene	0	0.00990099	1.54031e-15	0.926338	4.80732	FALSE	6540.94	0.14713	0.857592	2.31962	2.03368e-14	Tb427_110015600:pseudogene	FALSE
4886	Tb427-080045300	0	0.00990099	1.55331e-15	0.609197	4.23337	FALSE	14510.8	0.561174	0.540707	1.46999	2.04804e-14	Tb427_080045300	FALSE
3152	Tb427-050039100	0	0.00990099	1.571e-15	0.67784	4.81669	FALSE	9905.46	0.27943	0.748429	2.06101	2.06855e-14	Tb427_050039100	TRUE
8226	Tb427-110056100	0	0.00990099	1.80298e-15	0.928101	4.36894	FALSE	5667.3	0.119271	0.88534	3.3678	2.37078e-14	Tb427_110056100	FALSE
3606	Tb427-060041300	0	0.00990099	1.87497e-15	0.525579	4.8447	FALSE	5029.51	0.100352	0.901963	2.80082	2.4621e-14	Tb427_060041300	FALSE
7560	Tb427-100153500	0	0.00990099	1.90483e-15	0.221639	4.20345	FALSE	11108.5	0.338573	0.699346	1.55334	2.49793e-14	Tb427_100153500	FALSE
3343	Tb427-060011900	0	0.00990099	1.91481e-15	0.569371	4.7046	FALSE	14182.6	0.531472	0.565838	1.50282	2.50762e-14	Tb427_060011900	FALSE
1763	Tb427-020029700	0	0.00990099	1.96369e-15	0.0881084	4.65807	FALSE	8680.77	0.224696	0.792932	1.86664	2.56816e-14	Tb427_020029700	TRUE
9012	Tb427-110142900	0	0.00990099	1.99043e-15	0.338019	4.21231	FALSE	6792.22	0.154985	0.851571	2.16881	2.59963e-14	Tb427_110142900	FALSE
2490	Tb427-040022700	6.05829e-05	0.00990099	2.02796e-15	0.625135	3.99621	FALSE	21478	1.76216	0.088089	1.16881	2.64508e-14	Tb427_040022700	FALSE
7466	Tb427-100143700	0	0.00990099	2.05125e-15	0.712367	4.12295	FALSE	4866.09	0.0955703	0.90733	2.88926	2.67187e-14	Tb427_100143700	FALSE
1476	Tb427-010027900:pseudogene	0	0.00990099	2.17968e-15	0.55482	4.55151	FALSE	8987.19	0.23811	0.779974	2.05204	2.83534e-14	Tb427_010027900:pseudogene	FALSE
7906	Tb427-110023500	0	0.00990099	2.53467e-15	0.269332	4.25404	FALSE	2769.72	0.0456382	0.954058	4.59513	3.29269e-14	Tb427_110023500	FALSE
1827	Tb427-030008000	0	0.00990099	2.53961e-15	0.0436091	4.84967	FALSE	8895.08	0.234429	0.785471	2.23249	3.29469e-14	Tb427_030008000	FALSE
4872	Tb427-080043900	0	0.00990099	2.6036e-15	0.562527	4.87245	FALSE	4721.43	0.0926028	0.911126	5.47949	3.3732e-14	Tb427_080043900	FALSE
2579	Tb427-040031600	0	0.00990099	2.72939e-15	0.188673	4.20958	FALSE	8422.77	0.214603	0.800785	2.0658	3.53144e-14	Tb427_040031600	FALSE
7547	Tb427-100152200	0	0.00990099	2.82513e-15	0.00551093	4.78907	FALSE	9157.68	0.244332	0.778272	2.06918	3.65044e-14	Tb427_100152200	TRUE
2447	Tb427-040018400	0	0.00990099	2.96773e-15	0.48449	4.67782	FALSE	8744	0.226923	0.794241	2.07986	3.8296e-14	Tb427_040018400	FALSE
8267	Tb427-110060200	0	0.00990099	3.00486e-15	0.346057	4.31386	FALSE	11602.3	0.364878	0.685079	1.94406	3.87235e-14	Tb427_110060200	FALSE
4820	Tb427-080038600	0	0.00990099	3.04195e-15	0.922745	4.72617	FALSE	10255.5	0.294257	0.738874	1.81822	3.91494e-14	Tb427_080038600	TRUE
2007	Tb427-030027300	0	0.00990099	3.28889e-15	0.319306	4.57696	FALSE	6205.83	0.136123	0.868455	2.31172	4.22714e-14	Tb427_030027300	TRUE
1505	Tb427-010031200	0	0.00990099	3.40366e-15	0.746893	4.92257	FALSE	16850.5	0.779938	0.417801	1.51308	4.36886e-14	Tb427_010031200	FALSE
8917	Tb427-110133300	0.000254584	0.00990099	3.98672e-15	0.244095	3.43786	FALSE	22449.1	2.09951	0.0539267	1.11972	5.11049e-14	Tb427_110133300	FALSE
6777	Tb427-100070700	0	0.00990099	4.13737e-15	0.571645	4.36261	FALSE	12713.5	0.434592	0.625524	1.57197	5.29659e-14	Tb427_100070700	FALSE
5212	Tb427-080078700	0	0.00990099	4.28622e-15	0.287547	4.85835	FALSE	5613.78	0.116323	0.89267	3.12511	5.47991e-14	Tb427_080078700	FALSE
2318	Tb427-040005500	0	0.00990099	4.88759e-15	0.821812	4.52169	FALSE	12005.7	0.389609	0.660864	1.83463	6.24053e-14	Tb427_040005500	FALSE
5718	Tb427-090048600	0	0.00990099	5.45972e-15	0.77866	4.53139	FALSE	12623.6	0.426686	0.634424	1.51442	6.96186e-14	Tb427_090048600	FALSE
873	Tb427-000736100	0	0.00990099	5.81082e-15	0.627206	4.8134	FALSE	2642.39	0.0433923	0.956937	14.5196	7.39982e-14	Tb427_000736100	FALSE
6253	Tb427-100017000	0	0.00990099	5.92825e-15	0.767416	4.23734	FALSE	13589.2	0.493108	0.58377	1.42532	7.53946e-14	Tb427_100017000	FALSE
4170	Tb427-070050000	0	0.00990099	6.00551e-15	0.685806	3.51589	FALSE	10132.6	0.291034	0.733115	1.72373	7.6277e-14	Tb427_070050000	FALSE
6309	Tb427-100022600	0	0.00990099	6.25978e-15	0.483968	4.90671	FALSE	3932.84	0.0716503	0.931675	4.63558	7.94026e-14	Tb427_100022600	TRUE
8938	Tb427-110135400	0	0.00990099	6.36065e-15	0.815361	4.15189	FALSE	11669	0.369075	0.676309	1.61931	8.05766e-14	Tb427_110135400	FALSE
2697	Tb427-040044000	0	0.00990099	6.41264e-15	0.808997	4.4572	FALSE	3968.75	0.0725303	0.929974	4.24119	8.11291e-14	Tb427_040044000	TRUE
1948	Tb427-030020100	0	0.00990099	6.93342e-15	0.0448615	4.50923	FALSE	6433.33	0.143067	0.864398	3.10794	8.76033e-14	Tb427_030020100	FALSE
8427	Tb427-110076200	0	0.00990099	6.99353e-15	0.268692	4.84782	FALSE	4624.2	0.0903934	0.912827	4.80143	8.82478e-14	Tb427_110076200	TRUE
7002	Tb427-100095100	0	0.00990099	7.37039e-15	0.52158	4.89986	FALSE	16054.1	0.689036	0.477487	1.4322	9.28822e-14	Tb427_100095100	FALSE
4141	Tb427-070047100	0	0.00990099	8.01003e-15	0.300645	4.45957	FALSE	19455.5	1.15177	0.257461	1.24917	1.00812e-13	Tb427_070047100	FALSE
8257	Tb427-110059200	0	0.00990099	8.4773e-15	0.467916	4.61543	FALSE	6055.02	0.131451	0.876963	4.10539	1.06554e-13	Tb427_110059200	TRUE
5343	Tb427-090008300	0	0.00990099	8.98821e-15	0.893949	4.60767	FALSE	5451.13	0.11223	0.892801	3.05425	1.1283e-13	Tb427_090008300	FALSE
6658	Tb427-100058500	0	0.00990099	9.21024e-15	0.898746	4.6722	FALSE	11885.3	0.377996	0.676178	1.64101	1.15468e-13	Tb427_100058500	FALSE
2631	Tb427-040037200	0	0.00990099	9.25337e-15	0.617403	4.62481	FALSE	8857.37	0.23404	0.780628	1.81159	1.15858e-13	Tb427_040037200	TRUE
1370	Tb427-010015000	0	0.00990099	9.58857e-15	0.679511	4.68554	FALSE	6023.63	0.129559	0.878272	3.44651	1.199e-13	Tb427_010015000	TRUE
2107	Tb427-030038800	0	0.00990099	9.92939e-15	0.335648	4.54065	FALSE	6343.81	0.139811	0.871728	2.99577	1.24002e-13	Tb427_030038800	FALSE
8665	Tb427-110101100	0	0.00990099	1.04184e-14	0.90304	4.20491	FALSE	3082.26	0.0522112	0.948298	5.75997	1.29942e-13	Tb427_110101100	TRUE
8789	Tb427-110120200	0	0.00990099	1.11405e-14	0.525009	4.7744	FALSE	8346.99	0.210604	0.80733	2.29457	1.3877e-13	Tb427_110120200	FALSE
4130	Tb427-070046000	0	0.00990099	1.14483e-14	0.67416	3.83196	FALSE	16574.7	0.749863	0.431021	1.38777	1.42421e-13	Tb427_070046000	FALSE
5924	Tb427-090070000	0	0.00990099	1.16325e-14	0.692957	4.57804	FALSE	10078.1	0.285378	0.744372	1.77773	1.44526e-13	Tb427_090070000	FALSE
9037	Tb427-110145700	0	0.00990099	1.21598e-14	0.489625	4.9345	FALSE	15588.1	0.637251	0.508639	1.49457	1.50884e-13	Tb427_110145700	FALSE
3951	Tb427-070026300	0	0.00990099	1.23618e-14	0.911166	4.56126	FALSE	16337.6	0.728575	0.440314	1.33364	1.53195e-13	Tb427_070026300	FALSE
7644	Tb427-100162600	0	0.00990099	1.26629e-14	0.161522	3.91088	FALSE	10199	0.291092	0.738613	1.54463	1.56725e-13	Tb427_100162600	TRUE
6860	Tb427-100080200	0	0.00990099	1.38176e-14	0.950724	4.24217	FALSE	9047.32	0.240397	0.77801	1.93075	1.70799e-13	Tb427_100080200	FALSE
7933	Tb427-110026300	0	0.00990099	1.4504e-14	0.824023	4.5888	FALSE	11954.6	0.386891	0.659817	1.4378	1.79055e-13	Tb427_110026300	FALSE
5742	Tb427-090051000	0	0.00990099	1.72094e-14	0.0688601	3.70751	FALSE	14412.7	0.552042	0.548298	1.49632	2.12184e-13	Tb427_090051000	FALSE
1284	Tb427-010006400	0	0.00990099	2.04666e-14	0.120165	4.6714	FALSE	7541.59	0.18093	0.828927	2.22115	2.52023e-13	Tb427_010006400	FALSE
2637	Tb427-040038000	0	0.00990099	2.13894e-14	0.183033	4.90282	FALSE	8319.79	0.210779	0.803665	1.94675	2.63051e-13	Tb427_040038000	FALSE
4768	Tb427-080033300	0	0.00990099	2.18356e-14	0.772621	4.54752	FALSE	9014.48	0.237914	0.784293	2.08898	2.68198e-13	Tb427_080033300	FALSE
1466	Tb427-010026900	0	0.00990099	2.24753e-14	0.74356	4.87435	FALSE	13542.2	0.481552	0.601832	1.38488	2.75706e-13	Tb427_010026900	FALSE
8260	Tb427-110059500	0	0.00990099	2.26467e-14	0.714202	4.63975	FALSE	18076.5	0.943909	0.329974	1.24378	2.77458e-13	Tb427_110059500	FALSE
1701	Tb427-020023400	0	0.00990099	2.28401e-14	0.815806	4.28255	FALSE	12542.8	0.421458	0.636387	1.47757	2.79474e-13	Tb427_020023400	TRUE
9434	Tb427-110185900	6.41168e-07	0.00990099	2.30463e-14	0.10277	4.08252	FALSE	18287.1	0.978066	0.314267	1.26442	2.81641e-13	Tb427_110185900	FALSE
4962	Tb427-080053300	0	0.00990099	2.34763e-14	0.050752	4.56671	FALSE	16123.3	0.704679	0.455366	1.36381	2.86535e-13	Tb427_080053300	FALSE
3396	Tb427-060017600	0	0.00990099	2.68241e-14	0.885004	2.18853	FALSE	19661.3	1.20425	0.235864	1.22775	3.26984e-13	Tb427_060017600	FALSE
3050	Tb427-050028900	0	0.00990099	2.78453e-14	0.582418	3.91498	FALSE	9332.58	0.253369	0.764529	1.64754	3.39005e-13	Tb427_050028900	FALSE
7679	Tb427-100167300	0	0.00990099	2.87009e-14	0.598078	4.72952	FALSE	6079.44	0.131092	0.876047	3.60493	3.48985e-13	Tb427_100167300	FALSE
8686	Tb427-110103200	0	0.00990099	2.98114e-14	0.992961	4.57953	FALSE	8556.06	0.22119	0.790576	1.73661	3.62033e-13	Tb427_110103200	FALSE
4922	Tb427-080048900	0	0.00990099	3.05965e-14	0.919105	4.61114	FALSE	9445.53	0.257661	0.764005	1.8535	3.71102e-13	Tb427_080048900	FALSE
6415	Tb427-100033800	0	0.00990099	3.19964e-14	0.438189	4.57014	FALSE	8302.72	0.208788	0.80877	2.28862	3.87597e-13	Tb427_100033800	FALSE
574	Tb427-000636500:pseudogene	0	0.00990099	3.25248e-14	0.395569	4.78694	FALSE	4974.68	0.0986901	0.909948	3.55543	3.93506e-13	Tb427_000636500:pseudogene	FALSE
8413	Tb427-110074800	0	0.00990099	3.41542e-14	0.776346	4.82707	FALSE	11117	0.340644	0.695288	1.57658	4.12189e-13	Tb427_110074800	FALSE
1588	Tb427-020011800	0	0.00990099	3.41458e-14	0.522723	4.84163	FALSE	16567.8	0.742575	0.443194	1.47885	4.12189e-13	Tb427_020011800	FALSE
7334	Tb427-100130000	2.58719e-06	0.00990099	3.48514e-14	0.347319	3.70952	FALSE	19378.1	1.17789	0.233508	1.23793	4.20081e-13	Tb427_100130000	FALSE
4710	Tb427-080027500	0	0.00990099	3.50391e-14	0.724976	4.79105	FALSE	7396.37	0.174892	0.837696	2.29217	4.21818e-13	Tb427_080027500	FALSE
6690	Tb427-100061800	0	0.00990099	3.56508e-14	0.74588	3.77416	FALSE	17306.8	0.844812	0.376832	1.32841	4.28651e-13	Tb427_100061800	FALSE
2735	Tb427-040048400	0	0.00990099	3.56987e-14	0.196338	4.76807	FALSE	11929	0.384582	0.663613	1.52409	4.28694e-13	Tb427_040048400	FALSE
9084	Tb427-110150600	0	0.00990099	3.623e-14	0.56677	4.20175	FALSE	18172.4	0.954926	0.329188	1.27931	4.34535e-13	Tb427_110150600	FALSE
1355	Tb427-010013500	0	0.00990099	3.71237e-14	0.502464	4.91373	FALSE	10512.3	0.303318	0.734686	1.80465	4.44704e-13	Tb427_010013500	FALSE
3550	Tb427-060035700	0	0.00990099	4.02784e-14	0.718574	4.74978	FALSE	4914.65	0.0963282	0.910733	2.8446	4.81899e-13	Tb427_060035700	FALSE
8523	Tb427-110085800	0	0.00990099	4.21413e-14	0.0893153	4.74531	FALSE	9603	0.26302	0.764921	1.8495	5.03566e-13	Tb427_110085800	TRUE
3134	Tb427-050037300	0	0.00990099	4.28091e-14	0.0616349	4.49547	FALSE	5705.44	0.118957	0.887958	2.40821	5.10915e-13	Tb427_050037300	FALSE
9468	Tb427-110189300	0	0.00990099	5.47082e-14	0.849029	4.67746	FALSE	8284.2	0.208016	0.809031	1.98981	6.52124e-13	Tb427_110189300	FALSE
5575	Tb427-090033800	0	0.00990099	5.53605e-14	0.135622	4.65612	FALSE	2524.74	0.0402606	0.960995	5.97576	6.5909e-13	Tb427_090033800	TRUE
7119	Tb427-100106800	1.54956e-06	0.00990099	5.68879e-14	0.544349	1.00075	FALSE	22141.9	1.91323	0.0760471	1.15518	6.76443e-13	Tb427_100106800	FALSE
6316	Tb427-100023300	0	0.00990099	5.69737e-14	0.898965	4.49509	FALSE	8082.38	0.200992	0.812435	1.82708	6.76632e-13	Tb427_100023300	FALSE
2040	Tb427-030030600	0	0.00990099	5.70818e-14	0.354221	4.13281	FALSE	10276.6	0.295874	0.733508	1.75805	6.77086e-13	Tb427_030030600	FALSE
3154	Tb427-050039300	0	0.00990099	5.76978e-14	0.943195	4.20623	FALSE	8627.59	0.222405	0.794241	1.97372	6.83556e-13	Tb427_050039300	FALSE
6711	Tb427-100063900:pseudogene	0	0.00990099	6.05811e-14	0.235814	4.61694	FALSE	3997.83	0.0727744	0.929974	4.26771	7.15965e-13	Tb427_100063900:pseudogene	FALSE
1943	Tb427-030019600	0	0.00990099	6.05573e-14	0.972353	3.61135	FALSE	6946.1	0.160009	0.846728	1.83695	7.15965e-13	Tb427_030019600	FALSE
5789	Tb427-090055700	0	0.00990099	6.10114e-14	0.585334	4.18349	FALSE	9493.66	0.260087	0.763482	1.76262	7.20172e-13	Tb427_090055700	FALSE
1855	Tb427-030010800	0	0.00990099	6.28103e-14	0.93018	4.45719	FALSE	16383.3	0.737562	0.432199	1.31031	7.40505e-13	Tb427_030010800	FALSE
5200	Tb427-080077500	0	0.00990099	7.52024e-14	0.914492	4.23618	FALSE	13270.8	0.469973	0.601047	1.43286	8.85524e-13	Tb427_080077500	FALSE
3703	Tb427-060051600	0	0.00990099	7.67036e-14	0.930081	3.80513	FALSE	8476.07	0.216826	0.796335	1.84802	9.02106e-13	Tb427_060051600	FALSE
3307	Tb427-060008300	0.0368774	0.00990099	7.93327e-14	0.0193755	1.2368	FALSE	27233.5	5.0946	0.00052356	1.03986	9.31895e-13	Tb427_060008300	FALSE
8121	Tb427-110045400	0	0.00990099	7.94774e-14	0.751689	4.8244	FALSE	6555.9	0.147579	0.858508	2.6577	9.32465e-13	Tb427_110045400	TRUE
2491	Tb427-040022800	0	0.00990099	8.70132e-14	0.843624	3.79916	FALSE	15065.4	0.607107	0.511387	1.32022	1.01964e-12	Tb427_040022800	FALSE
7209	Tb427-100117000	0	0.00990099	8.93943e-14	0.39706	4.26687	FALSE	10093	0.287737	0.737173	1.56071	1.04628e-12	Tb427_100117000	FALSE
6390	Tb427-100031100	0	0.00990099	9.13787e-14	0.951632	4.70021	FALSE	9391.03	0.253635	0.770419	1.7827	1.06822e-12	Tb427_100031100	FALSE
4204	Tb427-070053400	0	0.00990099	1.04011e-13	0.295362	4.41516	FALSE	9321.32	0.25262	0.768717	2.2073	1.21442e-12	Tb427_070053400	FALSE
5826	Tb427-090059400	0	0.00990099	1.05332e-13	0.179943	4.80013	FALSE	7328.5	0.173251	0.838482	2.5556	1.22837e-12	Tb427_090059400	FALSE
9285	Tb427-110170700	0	0.00990099	1.07291e-13	0.0835135	4.68751	FALSE	8992.92	0.236726	0.782984	1.61717	1.24971e-12	Tb427_110170700	FALSE
7433	Tb427-100140000	0	0.00990099	1.07662e-13	0.787166	4.26147	FALSE	8149.27	0.204219	0.810079	2.15566	1.25252e-12	Tb427_100140000	TRUE
4766	Tb427-080033100	0	0.00990099	1.14112e-13	0.383724	4.25824	FALSE	12841.9	0.434485	0.633246	1.35483	1.32597e-12	Tb427_080033100	FALSE
8967	Tb427-110138400	0	0.00990099	1.15225e-13	0.775416	4.69993	FALSE	6434.09	0.142682	0.86911	3.08154	1.3373e-12	Tb427_110138400	FALSE
8975	Tb427-110139200	0	0.00990099	1.1546e-13	0.949183	4.74825	FALSE	7223.34	0.168785	0.845157	2.46334	1.33842e-12	Tb427_110139200	FALSE
3640	Tb427-060044700	0	0.00990099	1.17226e-13	0.0778586	4.89722	FALSE	6373.76	0.140942	0.86623	3.94184	1.35727e-12	Tb427_060044700	FALSE
4307	Tb427-070063700	4.16557e-07	0.00990099	1.18989e-13	0.571523	4.90208	FALSE	18122.7	0.932944	0.345157	1.29293	1.37604e-12	Tb427_070063700	FALSE
3099	Tb427-050033800	0	0.00990099	1.21411e-13	0.0156651	4.07585	FALSE	7467.19	0.177296	0.833901	2.03383	1.40238e-12	Tb427_050033800	FALSE
2537	Tb427-040027400	0	0.00990099	1.28494e-13	0.740882	4.84641	FALSE	5104.26	0.102542	0.902487	3.99027	1.48074e-12	Tb427_040027400	TRUE
2440	Tb427-040017700	0	0.00990099	1.28501e-13	0.396921	4.22338	FALSE	18069	0.929117	0.34712	1.25229	1.48074e-12	Tb427_040017700	FALSE
9204	Tb427-110162600	0	0.00990099	1.32044e-13	0.96605	4.76051	FALSE	7454.15	0.175856	0.838613	2.0718	1.51976e-12	Tb427_110162600	FALSE
3174	Tb427-050041300	0	0.00990099	1.35889e-13	0.497786	4.15868	FALSE	4440.26	0.0843872	0.917932	3.60338	1.56216e-12	Tb427_050041300	FALSE
4552	Tb427-080009200	0	0.00990099	1.43448e-13	0.315343	4.73339	FALSE	18267.9	0.947708	0.345288	1.32429	1.6471e-12	Tb427_080009200	FALSE
9282	Tb427-110170400	0	0.00990099	1.46726e-13	0.188321	3.82429	FALSE	10786.2	0.32039	0.715969	1.51259	1.68275e-12	Tb427_110170400	FALSE
4134	Tb427-070046400	0	0.00990099	1.50128e-13	0.69148	4.07815	FALSE	8509.5	0.218491	0.795288	1.79453	1.71972e-12	Tb427_070046400	FALSE
6157	Tb427-100007300	0	0.00990099	1.54921e-13	0.17831	3.79792	FALSE	12141.1	0.394444	0.66034	1.53318	1.77253e-12	Tb427_100007300	FALSE
5840	Tb427-090061200	0	0.00990099	1.5994e-13	0.499284	4.64119	FALSE	6651.9	0.148141	0.862565	2.1203	1.82781e-12	Tb427_090061200	FALSE
1660	Tb427-020019300	0	0.00990099	1.62465e-13	0.905372	4.73176	FALSE	6161.93	0.133193	0.875654	2.5714	1.85448e-12	Tb427_020019300	FALSE
7648	Tb427-100163000	0	0.00990099	1.75994e-13	0.223938	4.56151	FALSE	6538.62	0.14535	0.863351	2.45626	2.00654e-12	Tb427_100163000	FALSE
7381	Tb427-100134800	5.86156e-07	0.00990099	1.77337e-13	0.590602	4.50762	FALSE	17838.7	0.89994	0.356806	1.24749	2.01947e-12	Tb427_100134800	FALSE
6894	Tb427-100083700	0	0.00990099	1.86467e-13	0.603856	4.92255	FALSE	11928.8	0.38058	0.673298	1.73442	2.12095e-12	Tb427_100083700	FALSE
6849	Tb427-100079100	0	0.00990099	1.89121e-13	0.684874	4.92101	FALSE	6837.17	0.155469	0.85301	2.20861	2.14862e-12	Tb427_100079100	FALSE
8284	Tb427-110061900	0	0.00990099	1.90056e-13	0.93747	3.7884	FALSE	10389	0.301068	0.731021	1.8511	2.15672e-12	Tb427_110061900	FALSE
4030	Tb427-070036000	0	0.00990099	1.95839e-13	0.81695	4.07312	FALSE	7062.81	0.162819	0.847382	2.06401	2.21973e-12	Tb427_070036000	FALSE
8554	Tb427-110088900	0	0.00990099	1.96683e-13	0.758907	4.15782	FALSE	9450.34	0.258693	0.762565	2.13973	2.2267e-12	Tb427_110088900	FALSE
7415	Tb427-100138200	0	0.00990099	1.99045e-13	0.914127	4.19994	FALSE	10902.5	0.326928	0.708901	1.57317	2.25081e-12	Tb427_100138200	FALSE
3984	Tb427-070029600	0	0.00990099	2.07957e-13	0.0635814	4.14118	FALSE	14285.5	0.544408	0.55	1.35871	2.34885e-12	Tb427_070029600	FALSE
8642	Tb427-110098800	0	0.00990099	2.40384e-13	0.618272	3.69695	FALSE	8812.02	0.230058	0.785995	1.82443	2.71194e-12	Tb427_110098800	FALSE
2051	Tb427-030031700	0	0.00990099	2.41707e-13	0.728823	4.25587	FALSE	9104.95	0.24266	0.776571	2.07814	2.7237e-12	Tb427_030031700	FALSE
8860	Tb427-110127300	0	0.00990099	2.45259e-13	0.0102847	4.23067	FALSE	10710.6	0.315317	0.719764	1.4334	2.76052e-12	Tb427_110127300	FALSE
2663	Tb427-040040600	0	0.00990099	2.47884e-13	0.19416	4.25125	FALSE	12800.3	0.434971	0.631545	1.6013	2.78683e-12	Tb427_040040600	FALSE
3385	Tb427-060016500	0	0.00990099	2.52466e-13	0.910552	4.51243	FALSE	8180.92	0.205282	0.808901	2.22275	2.83505e-12	Tb427_060016500	FALSE
7293	Tb427-100125900	0	0.00990099	2.6366e-13	0.220237	4.69721	FALSE	6172	0.132848	0.877487	2.38399	2.95733e-12	Tb427_100125900	TRUE
4268	Tb427-070059800	0	0.00990099	2.64269e-13	0.371719	4.61199	FALSE	2681.87	0.0431348	0.956806	3.78578	2.96073e-12	Tb427_070059800	FALSE
7864	Tb427-110019200	0	0.00990099	2.78741e-13	0.125128	4.62324	FALSE	9663.07	0.264424	0.764921	2.07576	3.11926e-12	Tb427_110019200	TRUE
8617	Tb427-110095300	1.8765e-05	0.00990099	2.81942e-13	0.486335	3.5463	FALSE	12777.2	0.438356	0.617539	1.40467	3.15144e-12	Tb427_110095300	FALSE
9374	Tb427-110179800	0	0.00990099	2.83016e-13	0.184497	3.50512	FALSE	11537.4	0.361316	0.681937	1.47677	3.1598e-12	Tb427_110179800	FALSE
4163	Tb427-070049300	0	0.00990099	3.17038e-13	0.768177	3.84355	FALSE	16949.4	0.792027	0.408508	1.35529	3.53557e-12	Tb427_070049300	TRUE
7414	Tb427-100138100	0	0.00990099	3.24274e-13	0.42435	4.3263	FALSE	5702.85	0.120004	0.884424	3.09945	3.61212e-12	Tb427_100138100	TRUE
857	Tb427-000729100	0.0583334	0.00990099	3.26048e-13	0.243931	1.00157	FALSE	25388.3	3.93949	0.00065445	1.03889	3.62771e-12	Tb427_000729100	FALSE
3998	Tb427-070031000	0	0.00990099	3.41398e-13	0.430709	4.42072	FALSE	15824.2	0.673609	0.474084	1.35541	3.79414e-12	Tb427_070031000	TRUE
6978	Tb427-100092700	0	0.00990099	3.66324e-13	0.976254	4.4896	FALSE	10295.7	0.29776	0.730628	1.70165	4.06648e-12	Tb427_100092700	FALSE
2112	Tb427-030039300	0	0.00990099	3.80332e-13	0.0056096	4.31377	FALSE	7262.95	0.170625	0.83966	1.87188	4.21716e-12	Tb427_030039300	FALSE
6081	Tb427-090087500	0	0.00990099	3.92958e-13	0.559159	4.5858	FALSE	6830.9	0.155488	0.854058	2.40546	4.35218e-12	Tb427_090087500	FALSE
2993	Tb427-050022600	0	0.00990099	3.94894e-13	0.177226	3.7746	FALSE	11185.4	0.345332	0.688482	1.61972	4.36863e-12	Tb427_050022600	FALSE
1914	Tb427-030016700	0	0.00990099	4.46455e-13	0.592158	4.62711	FALSE	5511.01	0.11399	0.889791	3.4925	4.9334e-12	Tb427_030016700	TRUE
7151	Tb427-100110000	0	0.00990099	4.58659e-13	0.529611	3.12754	FALSE	8948.69	0.236581	0.779581	1.73636	5.06248e-12	Tb427_100110000	FALSE
6654	Tb427-100058100	0	0.00990099	4.67156e-13	0.352561	4.2097	FALSE	8406.57	0.214269	0.798953	1.91978	5.15041e-12	Tb427_100058100	TRUE
9005	Tb427-110142200	0	0.00990099	4.71049e-13	0.605119	3.99456	FALSE	10088.6	0.28687	0.738874	1.50712	5.18743e-12	Tb427_110142200	FALSE
9122	Tb427-110154400	0	0.00990099	5.01406e-13	0.316115	1.0002	FALSE	10842.5	0.326025	0.705628	1.69373	5.51547e-12	Tb427_110154400	FALSE
2549	Tb427-040028600	0	0.00990099	5.03032e-13	0.37175	4.32588	FALSE	8031.76	0.20019	0.808901	1.76421	5.52708e-12	Tb427_040028600	FALSE
7022	Tb427-100097100	0	0.00990099	5.06455e-13	0.494676	4.52075	FALSE	8571.47	0.219886	0.797906	1.90451	5.55838e-12	Tb427_100097100	TRUE
6167	Tb427-100008300:pseudogene	0	0.00990099	5.21667e-13	0.786167	4.55419	FALSE	11104.6	0.336467	0.703796	1.85651	5.71887e-12	Tb427_100008300:pseudogene	FALSE
7844	Tb427-110017200	1.13586e-06	0.00990099	5.66404e-13	0.187528	4.58919	FALSE	18353.4	0.982424	0.315969	1.32848	6.20228e-12	Tb427_110017200	FALSE
6009	Tb427-090080200	0	0.00990099	6.273e-13	0.893763	1.00009	FALSE	18584.1	1.00135	0.316361	1.23826	6.86136e-12	Tb427_090080200	FALSE
5691	Tb427-090045900	0	0.00990099	6.75192e-13	0.71651	4.64417	FALSE	12297.6	0.406505	0.647513	1.6387	7.37687e-12	Tb427_090045900	FALSE
4359	Tb427-070069100	0	0.00990099	6.88945e-13	0.20825	4.47836	FALSE	15854.4	0.672673	0.479188	1.39246	7.51866e-12	Tb427_070069100	FALSE
1764	Tb427-020029800	0	0.00990099	7.54659e-13	0.991595	4.91583	FALSE	17689.9	0.820667	0.430366	1.38426	8.22655e-12	Tb427_020029800	FALSE
4037	Tb427-070036700	0	0.00990099	7.74985e-13	0.305359	4.73644	FALSE	6622.33	0.149196	0.85733	2.59104	8.43863e-12	Tb427_070036700	FALSE
7766	Tb427-110009300	0.00244604	0.00990099	8.14651e-13	0.276878	3.75866	FALSE	22386.2	2.03614	0.0626963	1.08783	8.86059e-12	Tb427_110009300	FALSE
7677	Tb427-100167100	0	0.00990099	8.26318e-13	0.421472	4.69714	FALSE	13847.2	0.510761	0.575393	1.64066	8.97741e-12	Tb427_100167100	FALSE
2581	Tb427-040031800	0	0.00990099	8.60774e-13	0.896337	4.8599	FALSE	5062.6	0.100893	0.90445	3.46479	9.34127e-12	Tb427_040031800	FALSE
6720	Tb427-100064800	2.99696e-06	0.00990099	9.23564e-13	0.624711	3.66742	FALSE	21305.5	1.58241	0.139005	1.22139	1.00115e-11	Tb427_100064800	FALSE
9164	Tb427-110158600	0	0.00990099	9.29332e-13	0.570418	4.68255	FALSE	16138.4	0.702355	0.461518	1.41127	1.00627e-11	Tb427_110158600	FALSE
2013	Tb427-030027900	0	0.00990099	9.57688e-13	0.897048	4.79479	FALSE	8233.78	0.20697	0.80877	2.71656	1.03582e-11	Tb427_030027900	FALSE
4527	Tb427-080006700	0	0.00990099	9.6171e-13	0.891269	4.86159	FALSE	14679.1	0.568041	0.544372	1.4596	1.03901e-11	Tb427_080006700	FALSE
6171	Tb427-100008700	0	0.00990099	9.97648e-13	0.25132	4.85484	FALSE	6438.68	0.141816	0.866361	2.36117	1.07664e-11	Tb427_100008700	TRUE
7147	Tb427-100109600	0	0.00990099	1.07318e-12	0.855512	4.4756	FALSE	10669.3	0.315462	0.717801	1.6049	1.15686e-11	Tb427_100109600	FALSE
7360	Tb427-100132600	0	0.00990099	1.1106e-12	0.870659	4.84997	FALSE	10958.6	0.328717	0.710209	1.77849	1.19587e-11	Tb427_100132600	FALSE
8898	Tb427-110131400	0	0.00990099	1.18106e-12	0.0903075	4.59582	FALSE	13790.7	0.503695	0.582723	1.5017	1.26892e-11	Tb427_110131400	FALSE
4140	Tb427-070047000	0	0.00990099	1.1802e-12	0.824915	3.6471	FALSE	17290.3	0.837076	0.383508	1.37134	1.26892e-11	Tb427_070047000	FALSE
5981	Tb427-090077400	0	0.00990099	1.19731e-12	0.98897	4.81421	FALSE	4770.82	0.0926392	0.912696	3.28818	1.28495e-11	Tb427_090077400	FALSE
7265	Tb427-100123100	0	0.00990099	1.25437e-12	0.36704	4.27757	FALSE	7562.53	0.181695	0.826309	1.83707	1.34471e-11	Tb427_100123100	FALSE
9410	Tb427-110183500	0	0.00990099	1.27842e-12	0.32563	4.36619	FALSE	9335.76	0.251482	0.773037	2.02745	1.36896e-11	Tb427_110183500	TRUE
5092	Tb427-080066600	0	0.00990099	1.32043e-12	0.916162	4.3437	FALSE	16008.6	0.686251	0.472382	1.55718	1.41239e-11	Tb427_080066600	FALSE
4830	Tb427-080039600	0	0.00990099	1.36049e-12	0.611356	4.64965	FALSE	7078.6	0.163917	0.845681	2.81184	1.45364e-11	Tb427_080039600	FALSE
7340	Tb427-100130600	0	0.00990099	1.45271e-12	0.476535	4.10026	FALSE	6929.18	0.158692	0.851309	2.19021	1.55047e-11	Tb427_100130600	FALSE
3078	Tb427-050031700	0	0.00990099	1.53663e-12	0.236429	4.87105	FALSE	13072.8	0.455327	0.613743	1.6685	1.63823e-11	Tb427_050031700	FALSE
6713	Tb427-100064100	0	0.00990099	1.54462e-12	0.414922	4.73536	FALSE	8917.05	0.233601	0.786387	2.23728	1.64493e-11	Tb427_100064100	FALSE
3623	Tb427-060043000	1.3097e-06	0.00990099	1.5636e-12	0.597086	4.61367	FALSE	20147	1.35789	0.171335	1.19309	1.66332e-11	Tb427_060043000	FALSE
8396	Tb427-110073100	2.6274e-07	0.00990099	1.58683e-12	0.912896	4.62594	FALSE	5381.67	0.109389	0.893848	2.54591	1.68618e-11	Tb427_110073100	FALSE
3869	Tb427-070017300	0	0.00990099	1.6064e-12	0.320259	3.60709	FALSE	10022.6	0.28459	0.739136	1.63299	1.7051e-11	Tb427_070017300	FALSE
3572	Tb427-060037900	0	0.00990099	1.60865e-12	0.0953063	4.58168	FALSE	7513.44	0.17967	0.83089	2.6379	1.70563e-11	Tb427_060037900	FALSE
4213	Tb427-070054300	0	0.00990099	1.66554e-12	0.288462	3.27871	FALSE	9428.37	0.25725	0.762696	1.62956	1.76402e-11	Tb427_070054300	TRUE
5863	Tb427-090063500	0	0.00990099	1.67606e-12	0.0901405	4.21725	FALSE	14356.6	0.545433	0.554712	1.34756	1.77322e-11	Tb427_090063500	FALSE
3175	Tb427-050041400	0	0.00990099	1.71103e-12	0.269932	4.66948	FALSE	4953.3	0.0987844	0.904058	3.81021	1.80824e-11	Tb427_050041400	FALSE
8056	Tb427-110038700	0	0.00990099	1.77482e-12	0.528426	3.76083	FALSE	12951.8	0.447699	0.616099	1.35325	1.87362e-11	Tb427_110038700	FALSE
7503	Tb427-100147800	0	0.00990099	1.79558e-12	0.555328	4.48172	FALSE	10770.7	0.32092	0.712827	1.47611	1.89346e-11	Tb427_100147800	FALSE
8176	Tb427-110051000	0	0.00990099	1.83103e-12	0.753678	4.58973	FALSE	14287.1	0.543057	0.552225	1.35169	1.92875e-11	Tb427_110051000	FALSE
5757	Tb427-090052500	0	0.00990099	1.84985e-12	0.607721	4.59585	FALSE	11583.7	0.361743	0.685995	1.68692	1.94646e-11	Tb427_090052500	FALSE
7142	Tb427-100109100	0	0.00990099	1.92867e-12	0.797195	4.9444	FALSE	9821.02	0.263124	0.787435	2.08103	2.0272e-11	Tb427_100109100	TRUE
1779	Tb427-020031300	0	0.00990099	1.96699e-12	0.591591	3.96263	FALSE	8178.33	0.20499	0.805366	1.65036	2.06524e-11	Tb427_020031300	FALSE
6476	Tb427-100040200	0	0.00990099	2.00125e-12	0.154278	4.35066	FALSE	14190.3	0.53081	0.565707	1.43358	2.09893e-11	Tb427_100040200	FALSE
7152	Tb427-100110100	0	0.00990099	2.00779e-12	0.410547	4.49994	FALSE	11168.4	0.341042	0.698822	1.76985	2.10351e-11	Tb427_100110100	FALSE
4851	Tb427-080041800	0	0.00990099	2.05211e-12	0.843665	3.87761	FALSE	10964.1	0.330796	0.702749	1.55097	2.14762e-11	Tb427_080041800	FALSE
4165	Tb427-070049500	0	0.00990099	2.174e-12	0.44304	4.54729	FALSE	10085.7	0.28435	0.745419	1.57872	2.27273e-11	Tb427_070049500	FALSE
2052	Tb427-030031800	0	0.00990099	2.28146e-12	0.922647	4.14367	FALSE	7441.24	0.176626	0.832199	1.67519	2.38251e-11	Tb427_030031800	FALSE
6538	Tb427-100046400	0	0.00990099	2.3086e-12	0.732915	4.2072	FALSE	3635.8	0.0647591	0.935602	3.58545	2.40825e-11	Tb427_100046400	FALSE
8361	Tb427-110069600	0	0.00990099	2.44469e-12	0.931631	4.27446	FALSE	11550.7	0.364551	0.676309	1.49336	2.54747e-11	Tb427_110069600	FALSE
2518	Tb427-040025500	0	0.00990099	2.56882e-12	0.384319	3.84964	FALSE	10243.1	0.294557	0.73089	1.40918	2.67394e-11	Tb427_040025500	FALSE
3518	Tb427-060032500	8.16512e-06	0.00990099	2.66502e-12	0.0751671	4.08709	FALSE	18205.4	0.967674	0.315969	1.19613	2.7711e-11	Tb427_060032500	FALSE
6446	Tb427-100037200	0	0.00990099	2.71058e-12	0.387667	4.37708	FALSE	8536.93	0.218412	0.797251	1.78026	2.81546e-11	Tb427_100037200	FALSE
5100	Tb427-080067400	0	0.00990099	2.81691e-12	0.743774	3.9242	FALSE	17889	0.930282	0.330236	1.28726	2.92277e-11	Tb427_080067400	FALSE
5824	Tb427-090059200	0	0.00990099	2.98778e-12	0.436326	4.52273	FALSE	9416.57	0.255771	0.765052	1.86639	3.09674e-11	Tb427_090059200	FALSE
5927	Tb427-090070300	0	0.00990099	3.02301e-12	0.733233	4.68863	FALSE	10137.4	0.289111	0.738874	1.59467	3.12991e-11	Tb427_090070300	FALSE
9185	Tb427-110160700	0	0.00990099	3.13049e-12	0.884285	4.49088	FALSE	4474.01	0.0850935	0.917408	2.81431	3.23773e-11	Tb427_110160700	FALSE
3544	Tb427-060035100	-9.72982e-08	0.00990099	3.13982e-12	0.951145	4.2682	FALSE	16093.1	0.689931	0.473037	1.35331	3.24393e-11	Tb427_060035100	FALSE
5872	Tb427-090064400	0	0.00990099	3.1485e-12	0.481366	3.84128	FALSE	6758.81	0.153643	0.851702	2.26702	3.24943e-11	Tb427_090064400	FALSE
4067	Tb427-070039700	0	0.00990099	3.42584e-12	0.875732	3.78059	FALSE	15656.7	0.658225	0.482461	1.46975	3.5319e-11	Tb427_070039700	FALSE
7384	Tb427-100135100	9.42999e-06	0.00990099	4.02749e-12	0.771759	3.77372	FALSE	18518.4	1.0024	0.308901	1.23502	4.14776e-11	Tb427_100135100	FALSE
2251	Tb427-030054100	0	0.00990099	4.34579e-12	0.685354	1.00029	FALSE	12959.3	0.450755	0.610995	1.56628	4.47081e-11	Tb427_030054100	FALSE
7633	Tb427-100161500	0	0.00990099	4.68596e-12	0.887186	4.29918	FALSE	9535.23	0.261082	0.762696	2.02688	4.81566e-11	Tb427_100161500	FALSE
7747	Tb427-110007400	0	0.00990099	4.8423e-12	0.462028	4.23769	FALSE	8754.69	0.228502	0.786649	1.67705	4.97105e-11	Tb427_110007400	TRUE
8069	Tb427-110040000	0	0.00990099	5.63334e-12	0.422248	4.16713	FALSE	14269.4	0.539647	0.556545	1.42552	5.77701e-11	Tb427_110040000	FALSE
3691	Tb427-060050400	0	0.00990099	5.87427e-12	0.402661	4.55165	FALSE	7354.95	0.172993	0.839005	2.01069	6.01772e-11	Tb427_060050400	FALSE
3946	Tb427-070025800	0	0.00990099	5.93758e-12	0.218592	4.08918	FALSE	18863.7	1.02929	0.312173	1.22072	6.07614e-11	Tb427_070025800	FALSE
5979	Tb427-090077200	0	0.00990099	6.00585e-12	0.770561	3.98824	FALSE	9006.42	0.238605	0.77788	1.89099	6.13953e-11	Tb427_090077200	FALSE
8089	Tb427-110042200	0	0.00990099	6.04254e-12	0.503905	2.94108	FALSE	10961.7	0.331187	0.701963	1.51803	6.17053e-11	Tb427_110042200	TRUE
7710	Tb427-100170400	7.53969e-07	0.00990099	6.07989e-12	0.845816	4.51028	FALSE	14750.3	0.573344	0.539267	1.31645	6.20213e-11	Tb427_100170400	FALSE
2619	Tb427-040036000	1.26722e-06	0.00990099	6.19952e-12	0.730681	4.4147	FALSE	20210.5	1.31806	0.199084	1.24187	6.31751e-11	Tb427_040036000	TRUE
6359	Tb427-100028000	0	0.00990099	6.88269e-12	0.666182	4.25897	FALSE	11859.8	0.378798	0.670288	1.77005	7.00632e-11	Tb427_100028000	FALSE
6996	Tb427-100094500	0	0.00990099	6.9688e-12	0.72138	4.00488	FALSE	7796.37	0.188535	0.825393	2.1611	7.08653e-11	Tb427_100094500	FALSE
1911	Tb427-030016400	0	0.00990099	8.04475e-12	0.302251	3.72	FALSE	9311.36	0.252607	0.76466	1.79303	8.17208e-11	Tb427_030016400	FALSE
2719	Tb427-040046800:pseudogene	0	0.00990099	8.1517e-12	0.224149	3.28701	FALSE	9089.63	0.241574	0.778927	1.72492	8.27205e-11	Tb427_040046800:pseudogene	FALSE
6035	Tb427-090082800	0	0.00990099	8.27846e-12	0.994626	3.40971	FALSE	8729.5	0.22729	0.787173	1.83636	8.3919e-11	Tb427_090082800	FALSE
8144	Tb427-110047700	0	0.00990099	8.34719e-12	0.406991	4.8332	FALSE	4993.67	0.0987504	0.906283	3.55605	8.45273e-11	Tb427_110047700	FALSE
6798	Tb427-100072800	0	0.00990099	8.36871e-12	0.973159	4.15937	FALSE	7166.85	0.166054	0.844764	2.21463	8.46568e-11	Tb427_100072800	FALSE
9449	Tb427-110187400	0.00032607	0.00990099	8.51725e-12	0.413351	3.19376	FALSE	21251.6	1.69046	0.100262	1.13822	8.60695e-11	Tb427_110187400	FALSE
2144	Tb427-030042500	0	0.00990099	8.82521e-12	0.168587	4.74701	FALSE	12995.6	0.442927	0.63089	1.5599	8.90887e-11	Tb427_030042500	FALSE
7140	Tb427-100108900	0	0.00990099	8.91872e-12	0.606805	4.98005	FALSE	12107.2	0.368915	0.72788	2.46583	8.98653e-11	Tb427_100108900	TRUE
6736	Tb427-100066400	0	0.00990099	8.92069e-12	0.259638	4.27543	FALSE	12425.9	0.414892	0.640576	1.47341	8.98653e-11	Tb427_100066400	FALSE
2174	Tb427-030045700	0	0.00990099	8.99673e-12	0.732835	4.61242	FALSE	10092.9	0.288688	0.733901	1.58318	9.05372e-11	Tb427_030045700	FALSE
2130	Tb427-030041100	0	0.00990099	9.05956e-12	0.21661	4.80778	FALSE	5367.79	0.108971	0.899869	2.6394	9.10749e-11	Tb427_030041100	FALSE
1780	Tb427-020031400	0	0.00990099	9.35146e-12	0.33713	4.86763	FALSE	10440.6	0.303987	0.726702	1.72215	9.39119e-11	Tb427_020031400	TRUE
4060	Tb427-070039000	3.55211e-07	0.00990099	1.01123e-11	0.48514	3.94321	FALSE	13673.8	0.496856	0.582068	1.35272	1.01447e-10	Tb427_070039000	FALSE
1226	Tb427-000832000	0	0.00990099	1.09387e-11	0.709925	3.98581	FALSE	14327.2	0.548067	0.546204	1.30541	1.09625e-10	Tb427_000832000	FALSE
2926	Tb427-050015600	0.000372467	0.00990099	1.10475e-11	0.761872	4.28668	FALSE	20378.7	1.36792	0.183377	1.15953	1.106e-10	Tb427_050015600	FALSE
6464	Tb427-100039000	0	0.00990099	1.12634e-11	0.618745	4.3369	FALSE	3295.96	0.0564045	0.943717	3.07917	1.12645e-10	Tb427_100039000	FALSE
7970	Tb427-110030000	0	0.00990099	1.18021e-11	0.259116	4.85056	FALSE	11577.3	0.36484	0.679058	1.81005	1.17912e-10	Tb427_110030000	FALSE
1359	Tb427-010013900	0	0.00990099	1.38855e-11	0.960154	3.3303	FALSE	9574.23	0.261319	0.762435	1.60006	1.38583e-10	Tb427_010013900	TRUE
8140	Tb427-110047300	0	0.00990099	1.39313e-11	0.742508	4.79603	FALSE	11451.7	0.354621	0.692539	1.78737	1.38845e-10	Tb427_110047300	TRUE
6953	Tb427-100089600	1.35767e-06	0.00990099	1.39404e-11	0.895824	2.19463	FALSE	15648.9	0.664702	0.47055	1.29961	1.38845e-10	Tb427_100089600	TRUE
1286	Tb427-010006600:pseudogene	8.60665e-07	0.00990099	1.43419e-11	0.165296	3.74872	FALSE	16274.5	0.724845	0.439136	1.28636	1.42697e-10	Tb427_010006600:pseudogene	FALSE
4942	Tb427-080050900	0	0.00990099	1.45812e-11	0.287027	4.61429	FALSE	10059.9	0.283908	0.743063	1.49499	1.44929e-10	Tb427_080050900	FALSE
8446	Tb427-110078100	0	0.00990099	1.48958e-11	0.591505	4.19782	FALSE	11312.2	0.349475	0.689267	1.42831	1.47904e-10	Tb427_110078100	FALSE
2125	Tb427-030040600	0.00442312	0.00990099	1.56313e-11	0.00924563	4.67762	FALSE	18832.8	1.0505	0.289005	1.17385	1.55049e-10	Tb427_030040600	FALSE
2246	Tb427-030053600	0	0.00990099	1.65652e-11	0.742941	4.46492	FALSE	10672.3	0.317378	0.711649	1.52527	1.64145e-10	Tb427_030053600	FALSE
5728	Tb427-090049600	0	0.00990099	1.85683e-11	0.440436	4.32832	FALSE	11642.8	0.367874	0.675131	1.64656	1.83805e-10	Tb427_090049600	FALSE
1597	Tb427-020012700	0	0.00990099	1.91944e-11	0.115041	4.62882	FALSE	13136.8	0.459343	0.609948	1.51952	1.8962e-10	Tb427_020012700	FALSE
5950	Tb427-090072800	5.01862e-05	0.00990099	1.91949e-11	0.285919	3.56923	FALSE	20642.7	1.43082	0.168848	1.15802	1.8962e-10	Tb427_090072800	FALSE
2075	Tb427-030034100	0	0.00990099	1.99581e-11	0.440427	3.29734	FALSE	10696.1	0.316584	0.714136	1.48412	1.96959e-10	Tb427_030034100	FALSE
7486	Tb427-100145900	0	0.00990099	2.07032e-11	0.764585	4.55736	FALSE	16325.5	0.722724	0.447382	1.26347	2.04105e-10	Tb427_100145900	FALSE
3955	Tb427-070026700	0	0.00990099	2.07368e-11	0.630742	3.28688	FALSE	15418.6	0.64201	0.487304	1.29647	2.04228e-10	Tb427_070026700	FALSE
8466	Tb427-110080100	0	0.00990099	2.17113e-11	0.0706414	4.1461	FALSE	6990.48	0.160753	0.846204	1.7781	2.13608e-10	Tb427_110080100	FALSE
7261	Tb427-100122700	0	0.00990099	2.23005e-11	0.920735	3.98521	FALSE	9218.92	0.247572	0.771204	1.70654	2.19182e-10	Tb427_100122700	FALSE
4596	Tb427-080013600	0	0.00990099	2.29742e-11	0.651679	4.22845	FALSE	8112.95	0.201917	0.811126	1.71861	2.25576e-10	Tb427_080013600	FALSE
6235	Tb427-100015200	0	0.00990099	2.37885e-11	0.489213	4.41087	FALSE	9676.86	0.266202	0.759817	1.58885	2.33334e-10	Tb427_100015200	FALSE
3404	Tb427-060018400	0	0.00990099	2.40627e-11	0.953749	4.25102	FALSE	11775.9	0.372315	0.678141	1.62184	2.35785e-10	Tb427_060018400	FALSE
6807	Tb427-100074000	0	0.00990099	2.47036e-11	0.0529116	4.3655	FALSE	7568.63	0.180492	0.830105	1.69155	2.4182e-10	Tb427_100074000	FALSE
7031	Tb427-100098000	0.00372058	0.00990099	2.49872e-11	0.735583	1.00074	FALSE	23301.5	2.59998	0.0185864	1.07394	2.4435e-10	Tb427_100098000	FALSE
1590	Tb427-020012000	0	0.00990099	2.67546e-11	0.658391	3.57388	FALSE	9270.85	0.248572	0.773168	1.76293	2.6137e-10	Tb427_020012000	FALSE
3179	Tb427-050041800	0	0.00990099	2.71382e-11	0.871988	4.28216	FALSE	7353.9	0.172442	0.839005	1.93424	2.6485e-10	Tb427_050041800	FALSE
1818	Tb427-030007100	8.02391e-06	0.00990099	2.95525e-11	0.786355	4.19691	FALSE	21161.2	1.58349	0.131806	1.14945	2.88122e-10	Tb427_030007100	FALSE
9002	Tb427-110141900	0	0.00990099	2.98474e-11	0.758716	3.84517	FALSE	9563.66	0.261638	0.763351	1.64884	2.90704e-10	Tb427_110141900	FALSE
7807	Tb427-110013500	0.0486514	0.00990099	3.09795e-11	0.656066	3.24053	FALSE	24845.6	3.3335	0.00379581	1.06166	3.01428e-10	Tb427_110013500	FALSE
8070	Tb427-110040100	0	0.00990099	3.15752e-11	0.851793	3.20059	FALSE	10970.8	0.332321	0.7	1.56813	3.06802e-10	Tb427_110040100	FALSE
3027	Tb427-050026200	5.33769e-07	0.00990099	3.15951e-11	0.033836	3.92566	FALSE	19033.1	1.05749	0.299084	1.23572	3.06802e-10	Tb427_050026200	FALSE
3161	Tb427-050040000	0	0.00990099	3.20822e-11	0.861764	3.83788	FALSE	13931.1	0.517953	0.56623	1.45341	3.11219e-10	Tb427_050040000	FALSE
2846	Tb427-050007400	6.78901e-07	0.00990099	3.51651e-11	0.638391	4.51324	FALSE	15061.6	0.612369	0.501571	1.42295	3.40785e-10	Tb427_050007400	FALSE
5904	Tb427-090068000	0	0.00990099	3.71438e-11	0.764539	4.47905	FALSE	5201.13	0.104629	0.896597	1.84733	3.59601e-10	Tb427_090068000	FALSE
2253	Tb427-030054300	2.38706e-05	0.00990099	3.92389e-11	0.0904535	4.83725	FALSE	13398.5	0.467296	0.615707	1.31405	3.79505e-10	Tb427_030054300	FALSE
2015	Tb427-030028100	0	0.00990099	4.25624e-11	0.0329425	4.958	FALSE	9780.27	0.27115	0.756675	2.03145	4.11239e-10	Tb427_030028100	FALSE
1848	Tb427-030010100	1.96433e-06	0.00990099	4.35726e-11	0.948336	1.00032	FALSE	19903.1	1.26017	0.214398	1.18453	4.20579e-10	Tb427_030010100	FALSE
3573	Tb427-060038000	0	0.00990099	4.38587e-11	0.130666	4.42291	FALSE	9412.48	0.255153	0.766623	1.86402	4.2292e-10	Tb427_060038000	FALSE
3517	Tb427-060032400:pseudogene	0	0.00990099	4.39685e-11	0.547107	3.5226	FALSE	7238.68	0.169356	0.83966	2.07916	4.23558e-10	Tb427_060032400:pseudogene	FALSE
6033	Tb427-090082600	0	0.00990099	4.53716e-11	0.768823	3.52007	FALSE	9604.75	0.265526	0.754188	1.7061	4.36639e-10	Tb427_090082600	FALSE
8488	Tb427-110082300	0	0.00990099	4.58123e-11	0.0362908	3.32061	FALSE	14363.2	0.547494	0.55	1.34995	4.40444e-10	Tb427_110082300	FALSE
4073	Tb427-070040300	0	0.00990099	4.75127e-11	0.097834	3.94095	FALSE	10226.4	0.293329	0.733377	1.6139	4.56339e-10	Tb427_070040300	FALSE
3949	Tb427-070026100	5.55611e-07	0.00990099	4.86275e-11	0.317752	4.53698	FALSE	16077.4	0.695249	0.463613	1.43371	4.66583e-10	Tb427_070026100	FALSE
4174	Tb427-070050400	5.17425e-06	0.00990099	4.86853e-11	0.957745	4.80051	FALSE	19070.3	1.09285	0.274346	1.22591	4.66676e-10	Tb427_070050400	FALSE
6917	Tb427-100086000	0	0.00990099	4.91253e-11	0.324923	4.14833	FALSE	15710.6	0.668924	0.47055	1.26041	4.70428e-10	Tb427_100086000	FALSE
5398	Tb427-090015100	0	0.00990099	4.9951e-11	0.506376	4.62437	FALSE	9372.27	0.25229	0.771597	1.71207	4.77863e-10	Tb427_090015100	FALSE
2944	Tb427-050017400	0	0.00990099	5.04436e-11	0.86693	4.69699	FALSE	6538.97	0.14474	0.865052	2.09609	4.81864e-10	Tb427_050017400	TRUE
5486	Tb427-090024800	0	0.00990099	5.04687e-11	0.725941	4.60019	FALSE	11219.1	0.343173	0.696597	1.75483	4.81864e-10	Tb427_090024800	FALSE
8788	Tb427-110120100	0	0.00990099	5.12028e-11	0.353174	4.95126	FALSE	11169.7	0.339737	0.701702	1.77045	4.88392e-10	Tb427_110120100	FALSE
3916	Tb427-070022200	8.68261e-07	0.00990099	5.27567e-11	0.320397	4.69186	FALSE	13379	0.473531	0.600916	1.33408	5.02719e-10	Tb427_070022200	FALSE
4795	Tb427-080036100	0	0.00990099	5.44325e-11	0.752277	4.68291	FALSE	6813.68	0.154961	0.851702	2.00745	5.1767e-10	Tb427_080036100	FALSE
5585	Tb427-090034800	7.44107e-05	0.00990099	5.43829e-11	0.657869	4.60409	FALSE	19460	1.20684	0.217147	1.19434	5.1767e-10	Tb427_090034800	FALSE
4695	Tb427-080026000	0	0.00990099	5.76438e-11	0.908061	3.12477	FALSE	6852.26	0.156683	0.849607	2.0178	5.47673e-10	Tb427_080026000	FALSE
4012	Tb427-070032400	0	0.00990099	7.05799e-11	0.55154	3.81315	FALSE	8516	0.217808	0.795419	1.50505	6.69922e-10	Tb427_070032400	FALSE
8475	Tb427-110081000	0	0.00990099	7.12264e-11	0.387727	4.76553	FALSE	8667.05	0.221753	0.799084	1.82989	6.75396e-10	Tb427_110081000	FALSE
5706	Tb427-090047400	0	0.00990099	7.40371e-11	0.366593	4.53149	FALSE	6043.62	0.13005	0.874346	1.89066	7.01362e-10	Tb427_090047400	FALSE
1813	Tb427-030006600	0	0.00990099	7.57328e-11	0.227078	4.37951	FALSE	13159.2	0.464445	0.600393	1.56152	7.16725e-10	Tb427_030006600	TRUE
6261	Tb427-100017800	0	0.00990099	7.60716e-11	0.309093	3.79117	FALSE	15277.8	0.628792	0.494372	1.2547	7.1923e-10	Tb427_100017800	FALSE
4460	Tb427-070080100	0	0.00990099	7.99057e-11	0.243265	4.33036	FALSE	7274.42	0.169688	0.840183	1.66935	7.54742e-10	Tb427_070080100	FALSE
3091	Tb427-050033000	0	0.00990099	8.06279e-11	0.677034	4.78956	FALSE	11422.8	0.351654	0.693717	1.60898	7.60822e-10	Tb427_050033000	FALSE
5850	Tb427-090062200	0	0.00990099	8.14754e-11	0.372559	4.53489	FALSE	6891.32	0.15697	0.853272	2.16394	7.68072e-10	Tb427_090062200	FALSE
1280	Tb427-010006000	0	0.00990099	8.6127e-11	0.902296	4.46246	FALSE	4740.29	0.0923407	0.91178	4.29751	8.11133e-10	Tb427_010006000	FALSE
8902	Tb427-110131800	1.78653e-05	0.00990099	8.74966e-11	0.948395	2.86871	FALSE	20818.5	1.52495	0.134293	1.15984	8.23233e-10	Tb427_110131800	FALSE
2677	Tb427-040042000	0	0.00990099	8.80104e-11	0.206722	4.53323	FALSE	8746.59	0.225777	0.793194	1.74218	8.27264e-10	Tb427_040042000	FALSE
6212	Tb427-100012800	0	0.00990099	8.91938e-11	0.156494	2.69873	FALSE	11694.5	0.369055	0.678141	1.52531	8.37575e-10	Tb427_100012800	FALSE
2848	Tb427-050007600:pseudogene	0	0.00990099	9.01606e-11	0.271079	3.78257	FALSE	4526.86	0.0855827	0.920681	2.79109	8.45834e-10	Tb427_050007600:pseudogene	FALSE
1989	Tb427-030024200	0	0.00990099	9.02793e-11	0.397157	4.66849	FALSE	8379.81	0.212792	0.798298	1.659	8.46128e-10	Tb427_030024200	FALSE
2769	Tb427-040051800	0	0.00990099	9.20045e-11	0.375026	4.63278	FALSE	7018.73	0.160922	0.848429	1.8792	8.61465e-10	Tb427_040051800	FALSE
3386	Tb427-060016600	0	0.00990099	9.37695e-11	0.486916	4.42316	FALSE	6468.83	0.142137	0.867016	2.4465	8.77143e-10	Tb427_060016600	FALSE
4249	Tb427-070057900	0	0.00990099	9.39021e-11	0.397437	4.53764	FALSE	7528.34	0.179338	0.831021	1.6523	8.77536e-10	Tb427_070057900	TRUE
3999	Tb427-070031100	0	0.00990099	9.49232e-11	0.684025	4.79947	FALSE	18131.3	0.936723	0.345812	1.44627	8.86224e-10	Tb427_070031100	FALSE
6601	Tb427-100052800	0	0.00990099	9.97468e-11	0.69625	4.85953	FALSE	6204.06	0.133959	0.872775	1.96073	9.30362e-10	Tb427_100052800	FALSE
6313	Tb427-100023000	0	0.00990099	1.06247e-10	0.975837	3.19026	FALSE	10096.3	0.287614	0.737304	1.58412	9.9004e-10	Tb427_100023000	FALSE
2720	Tb427-040046900	0.00363174	0.00990099	1.11913e-10	0.930135	1.00064	FALSE	22728.1	2.32365	0.0307592	1.07856	1.04183e-09	Tb427_040046900	FALSE
8801	Tb427-110121400	0	0.00990099	1.13363e-10	0.00555228	4.37947	FALSE	6828.79	0.155171	0.853141	1.88661	1.05432e-09	Tb427_110121400	TRUE
3315	Tb427-060009100	0	0.00990099	1.15278e-10	0.763437	3.81159	FALSE	4701.44	0.0911209	0.909948	2.63172	1.0711e-09	Tb427_060009100	TRUE
6562	Tb427-100048900	0	0.00990099	1.15821e-10	0.264164	2.13579	FALSE	10221.8	0.294035	0.731675	1.69367	1.07512e-09	Tb427_100048900	FALSE
5266	Tb427-080084600	0	0.00990099	1.16413e-10	0.452634	4.48842	FALSE	7826.13	0.190142	0.822382	1.72466	1.07958e-09	Tb427_080084600	FALSE
4475	Tb427-070081600:pseudogene	0	0.00990099	1.16814e-10	0.181341	4.26709	FALSE	5486.56	0.112406	0.892408	2.33254	1.08226e-09	Tb427_070081600:pseudogene	FALSE
4927	Tb427-080049400	0	0.00990099	1.26459e-10	0.266437	4.7301	FALSE	12532.5	0.413631	0.653403	1.54542	1.1705e-09	Tb427_080049400	FALSE
3294	Tb427-060007000:pseudogene	0	0.00990099	1.27567e-10	0.877274	3.88552	FALSE	6255.57	0.134764	0.87644	2.08839	1.17963e-09	Tb427_060007000:pseudogene	FALSE
6702	Tb427-100063000	0	0.00990099	1.27912e-10	0.949823	4.48288	FALSE	10828.3	0.324364	0.70877	1.73455	1.18169e-09	Tb427_100063000	TRUE
7141	Tb427-100109000	0	0.00990099	1.28292e-10	0.999734	4.92224	FALSE	9378.43	0.244826	0.805366	2.49396	1.18407e-09	Tb427_100109000	FALSE
1863	Tb427-030011600	0	0.00990099	1.30281e-10	0.73706	3.53961	FALSE	10378.6	0.300498	0.728272	1.49035	1.20129e-09	Tb427_030011600	FALSE
6924	Tb427-100086700	0	0.00990099	1.30628e-10	0.43953	3.91014	FALSE	8081.31	0.200033	0.812696	1.99122	1.20335e-09	Tb427_100086700	FALSE
4798	Tb427-080036400	0	0.00990099	1.31594e-10	0.326969	4.18071	FALSE	6828.3	0.154331	0.854319	1.94221	1.21109e-09	Tb427_080036400	FALSE
8386	Tb427-110072100	0	0.00990099	1.39866e-10	0.136543	3.60963	FALSE	6649.3	0.148982	0.857199	1.87205	1.28477e-09	Tb427_110072100	TRUE
4126	Tb427-070045600	0	0.00990099	1.39741e-10	0.741258	4.4598	FALSE	8354.67	0.211848	0.799084	1.55093	1.28477e-09	Tb427_070045600	FALSE
4474	Tb427-070081500	0	0.00990099	1.43902e-10	0.945022	4.42652	FALSE	9215.63	0.246702	0.773953	1.88177	1.3206e-09	Tb427_070081500	FALSE
6587	Tb427-100051400	0	0.00990099	1.45903e-10	0.31812	4.44151	FALSE	5352.06	0.109012	0.896335	3.00481	1.3377e-09	Tb427_100051400	TRUE
7048	Tb427-100099700	1.42438e-06	0.00990099	1.68004e-10	0.807063	4.62612	FALSE	14878.7	0.589338	0.522382	1.53221	1.53887e-09	Tb427_100099700	FALSE
6904	Tb427-100084700	0	0.00990099	1.68789e-10	0.852571	4.33802	FALSE	14330.1	0.536442	0.568586	1.37908	1.54399e-09	Tb427_100084700	FALSE
7872	Tb427-110020100	0	0.00990099	1.68882e-10	0.382864	4.11682	FALSE	15159.4	0.611796	0.511126	1.26819	1.54399e-09	Tb427_110020100	FALSE
7594	Tb427-100156900	0	0.00990099	1.74714e-10	0.20155	4.54973	FALSE	10299.6	0.296328	0.731152	1.5564	1.59581e-09	Tb427_100156900	FALSE
4752	Tb427-080031700	0	0.00990099	1.80533e-10	0.757752	3.91751	FALSE	7591.83	0.181708	0.828796	1.75248	1.64741e-09	Tb427_080031700	FALSE
6000	Tb427-090079300	0	0.00990099	1.8285e-10	0.560286	4.88136	FALSE	9300.6	0.250401	0.769895	1.8936	1.66698e-09	Tb427_090079300	FALSE
7240	Tb427-100120100	3.17947e-06	0.00990099	1.8431e-10	0.626528	3.08498	FALSE	17868.2	0.922361	0.334424	1.21494	1.67871e-09	Tb427_100120100	FALSE
4858	Tb427-080042500	3.89942e-06	0.00990099	1.91654e-10	0.430806	4.56719	FALSE	16097.5	0.704402	0.451963	1.28059	1.74396e-09	Tb427_080042500	FALSE
1337	Tb427-010011700	0.000201112	0.00990099	2.12918e-10	0.864992	3.77903	FALSE	17879.4	0.907022	0.352487	1.17322	1.93564e-09	Tb427_010011700	FALSE
4142	Tb427-070047200	4.3261e-05	0.00990099	2.20615e-10	0.308621	3.93455	FALSE	19924.1	1.27786	0.203534	1.20292	2.00373e-09	Tb427_070047200	FALSE
6677	Tb427-100060400	0.00274214	0.00990099	2.27906e-10	0.232027	3.18328	FALSE	22313.9	1.97571	0.0679319	1.07696	2.06801e-09	Tb427_100060400	FALSE
909	Tb427-000744900:pseudogene	0	0.00990099	2.33632e-10	0.153074	4.40685	FALSE	2041.8	0.0301466	0.971204	5.92997	2.11799e-09	Tb427_000744900:pseudogene	FALSE
2908	Tb427-050013800	8.62777e-07	0.00990099	2.3904e-10	0.77459	4.59455	FALSE	12377.2	0.408892	0.646728	1.4439	2.16498e-09	Tb427_050013800	FALSE
5604	Tb427-090036700	9.48755e-06	0.00990099	2.45887e-10	0.020924	4.28865	FALSE	19159.7	1.07549	0.294241	1.28825	2.22492e-09	Tb427_090036700	FALSE
6749	Tb427-100067900	0	0.00990099	2.67598e-10	0.154936	4.07934	FALSE	10324.3	0.298845	0.728927	1.59319	2.41911e-09	Tb427_100067900	FALSE
2097	Tb427-030037800	0	0.00990099	2.68944e-10	0.998764	4.0952	FALSE	11175.7	0.341246	0.695942	1.39061	2.42902e-09	Tb427_030037800	FALSE
4091	Tb427-070042100	0	0.00990099	2.71304e-10	0.823094	3.93831	FALSE	5659.44	0.11812	0.885864	2.00701	2.44805e-09	Tb427_070042100	FALSE
7097	Tb427-100104600	0	0.00990099	2.83985e-10	0.516329	4.75344	FALSE	10215.4	0.293239	0.734424	1.73185	2.56009e-09	Tb427_100104600	FALSE
1528	Tb427-020005300	0	0.00990099	2.8624e-10	0.178161	4.15817	FALSE	8527.43	0.216894	0.801309	1.86907	2.57802e-09	Tb427_020005300	FALSE
2995	Tb427-050022800	0	0.00990099	2.86622e-10	0.882582	4.46407	FALSE	11806	0.373524	0.678403	1.53279	2.57906e-09	Tb427_050022800	TRUE
7549	Tb427-100152400	2.05334e-05	0.00990099	2.88569e-10	0.716888	4.49913	FALSE	9842.5	0.272728	0.753927	1.50108	2.59417e-09	Tb427_100152400	FALSE
2759	Tb427-040050800	0.000521742	0.00990099	2.89638e-10	0.353387	2.91359	FALSE	19357.2	1.17236	0.235209	1.15025	2.60137e-09	Tb427_040050800	FALSE
1600	Tb427-020013000	0	0.00990099	2.98551e-10	0.211847	3.52766	FALSE	9594.24	0.264929	0.753403	1.53766	2.67894e-09	Tb427_020013000	FALSE
8572	Tb427-110090700	0	0.00990099	3.0679e-10	0.337971	1.91237	FALSE	6866.06	0.156577	0.849476	1.94235	2.74778e-09	Tb427_110090700	FALSE
1803	Tb427-030005600:pseudogene	0	0.00990099	3.06665e-10	0.607518	3.32477	FALSE	8809.29	0.227353	0.794372	1.66198	2.74778e-09	Tb427_030005600:pseudogene	FALSE
1338	Tb427-010011800	0	0.00990099	3.09304e-10	0.456798	4.70779	FALSE	14963.2	0.598323	0.517408	1.36669	2.76774e-09	Tb427_010011800	FALSE
6418	Tb427-100034100	0	0.00990099	3.1402e-10	0.0127037	3.66571	FALSE	12336.6	0.409251	0.645157	1.53819	2.80735e-09	Tb427_100034100	FALSE
6778	Tb427-100070800	0	0.00990099	3.22541e-10	0.159106	4.70524	FALSE	5771.29	0.12067	0.885209	2.3485	2.87997e-09	Tb427_100070800	FALSE
4116	Tb427-070044600	0	0.00990099	3.22737e-10	0.6407	3.79645	FALSE	8519.69	0.218385	0.795026	1.67551	2.87997e-09	Tb427_070044600	FALSE
8519	Tb427-110085400	2.97679e-06	0.00990099	3.24328e-10	0.00523284	4.42485	FALSE	14538.4	0.555966	0.55	1.3649	2.89151e-09	Tb427_110085400	FALSE
8762	Tb427-110111000	0	0.00990099	3.24721e-10	0.406078	4.05	FALSE	12429.4	0.414387	0.639921	1.37689	2.89234e-09	Tb427_110111000	FALSE
3656	Tb427-060046300	0.0244912	0.00990099	3.25267e-10	0.936114	1.00064	FALSE	24095.6	3.1888	0.00222513	1.0513	2.89455e-09	Tb427_060046300	FALSE
6485	Tb427-100041100	0	0.00990099	3.36379e-10	0.246066	4.68977	FALSE	13187.1	0.463448	0.603927	1.4751	2.99068e-09	Tb427_100041100	FALSE
1666	Tb427-020019900	0	0.00990099	3.39109e-10	0.69387	3.80178	FALSE	8558.57	0.21874	0.796859	1.6623	3.01219e-09	Tb427_020019900	FALSE
7743	Tb427-110007000	0	0.00990099	3.50796e-10	0.998316	4.03267	FALSE	5289.66	0.106448	0.897906	1.91455	3.11316e-09	Tb427_110007000	FALSE
3309	Tb427-060008500	0	0.00990099	3.51799e-10	0.929285	4.91944	FALSE	14320.2	0.518878	0.599738	1.74783	3.1192e-09	Tb427_060008500	FALSE
3741	Tb427-060055900	9.42216e-07	0.00990099	3.53137e-10	0.773077	4.66751	FALSE	14790.4	0.581366	0.528665	1.36413	3.1282e-09	Tb427_060055900	TRUE
4458	Tb427-070079900	0	0.00990099	3.70021e-10	0.0197643	4.43049	FALSE	8917.23	0.23253	0.789529	1.69414	3.27477e-09	Tb427_070079900	FALSE
1678	Tb427-020021100	0	0.00990099	3.7254e-10	0.0897377	4.41268	FALSE	8064.53	0.199799	0.81322	1.8014	3.29406e-09	Tb427_020021100	TRUE
9296	Tb427-110171800	0	0.00990099	3.79192e-10	0.917588	4.00012	FALSE	5474.03	0.112198	0.891885	2.52824	3.34982e-09	Tb427_110171800	FALSE
4324	Tb427-070065600	0	0.00990099	3.95162e-10	0.0806862	4.61188	FALSE	5549.57	0.114751	0.889136	2.42028	3.48772e-09	Tb427_070065600	FALSE
2475	Tb427-040021200	0	0.00990099	4.00181e-10	0.551957	4.27283	FALSE	9794.76	0.271955	0.753403	1.56626	3.5288e-09	Tb427_040021200	FALSE
5303	Tb427-080088500	2.71644e-07	0.00990099	4.15288e-10	0.750816	4.00473	FALSE	11732.6	0.375191	0.664005	1.47122	3.65868e-09	Tb427_080088500	FALSE
3230	Tb427-050046900	0	0.00990099	4.2451e-10	0.914311	4.58501	FALSE	5093.32	0.100498	0.905236	2.22547	3.73653e-09	Tb427_050046900	FALSE
9338	Tb427-110176000	-5.12026e-07	0.00990099	4.55507e-10	0.48072	3.15523	FALSE	9635.05	0.265152	0.756414	1.50602	4.00573e-09	Tb427_110176000	FALSE
3180	Tb427-050041900	0	0.00990099	4.71132e-10	0.911951	4.0057	FALSE	9883	0.277164	0.747382	1.67828	4.13938e-09	Tb427_050041900	FALSE
8614	Tb427-110095000	0	0.00990099	4.77738e-10	0.196351	4.70203	FALSE	5318.35	0.107884	0.897513	2.50216	4.1924e-09	Tb427_110095000	TRUE
1539	Tb427-020006600	0	0.00990099	4.78032e-10	0.919238	4.59491	FALSE	8522.61	0.217052	0.798168	1.55427	4.1924e-09	Tb427_020006600	FALSE
3930	Tb427-070024000	0	0.00990099	4.84833e-10	0.662444	4.19658	FALSE	8737.72	0.226042	0.790183	1.63127	4.24821e-09	Tb427_070024000	TRUE
3369	Tb427-060014900	1.06846e-06	0.00990099	4.90264e-10	0.218622	4.62706	FALSE	9267.16	0.247258	0.775393	1.65077	4.29191e-09	Tb427_060014900	FALSE
3207	Tb427-050044600	8.73811e-05	0.00990099	5.01471e-10	0.678432	3.11995	FALSE	17892.7	0.918234	0.341099	1.21114	4.38606e-09	Tb427_050044600	FALSE
7517	Tb427-100149200	0	0.00990099	5.10017e-10	0.550187	4.13505	FALSE	4777.25	0.0927161	0.909293	2.35993	4.45678e-09	Tb427_100149200	FALSE
2665	Tb427-040040800	0	0.00990099	5.11196e-10	0.907627	2.82182	FALSE	14954.9	0.587757	0.533246	1.39176	4.46306e-09	Tb427_040040800	FALSE
5508	Tb427-090027000	0.131478	0.00990099	5.14988e-10	0.840128	2.48021	FALSE	24592.3	3.29401	0.00562827	1.05099	4.49212e-09	Tb427_090027000	FALSE
262	Tb427-000274500:pseudogene	0	0.00990099	5.63054e-10	0.70858	4.53142	FALSE	4441.17	0.0839522	0.918325	2.89061	4.90697e-09	Tb427_000274500:pseudogene	FALSE
7605	Tb427-100158000	0	0.00990099	5.63806e-10	0.501788	4.35591	FALSE	7363.74	0.173612	0.836387	1.77265	4.90912e-09	Tb427_100158000	FALSE
5109	Tb427-080068300	0	0.00990099	5.76238e-10	0.172162	4.66166	FALSE	8195.47	0.204578	0.809424	2.3211	5.01285e-09	Tb427_080068300	FALSE
4031	Tb427-070036100	0	0.00990099	5.82186e-10	0.342423	4.14149	FALSE	12123.4	0.396659	0.651702	1.41164	5.06005e-09	Tb427_070036100	FALSE
7931	Tb427-110026100	1.04076e-06	0.00990099	6.03341e-10	0.324897	4.25358	FALSE	10240.8	0.293026	0.734817	1.52574	5.23923e-09	Tb427_110026100	FALSE
2021	Tb427-030028700	0	0.00990099	6.42199e-10	0.700185	4.29204	FALSE	6304.74	0.137983	0.868717	2.10408	5.57167e-09	Tb427_030028700	TRUE
2341	Tb427-040007800	0	0.00990099	6.48513e-10	0.610595	4.3347	FALSE	13333.3	0.47338	0.597513	1.38785	5.62141e-09	Tb427_040007800	FALSE
2307	Tb427-030059700	0	0.00990099	6.50314e-10	0.495862	4.45799	FALSE	11328.1	0.349395	0.690445	1.44323	5.63199e-09	Tb427_030059700	TRUE
8913	Tb427-110132900	0	0.00990099	6.78796e-10	0.0696871	4.24118	FALSE	5945.59	0.126001	0.881152	2.1354	5.87341e-09	Tb427_110132900	FALSE
5688	Tb427-090045600	0	0.00990099	6.96836e-10	0.370292	4.66222	FALSE	10317.4	0.296224	0.735733	1.83494	6.02412e-09	Tb427_090045600	FALSE
7913	Tb427-110024200	0	0.00990099	7.12196e-10	0.329897	4.60326	FALSE	5407.77	0.109895	0.895288	2.45034	6.15141e-09	Tb427_110024200	FALSE
5393	Tb427-090014600	0	0.00990099	7.29014e-10	0.262071	4.13432	FALSE	9196.77	0.244857	0.776047	1.6015	6.29108e-09	Tb427_090014600	FALSE
4665	Tb427-080022900	0	0.00990099	7.3435e-10	0.356216	4.82142	FALSE	9897.45	0.275797	0.753141	1.79599	6.32585e-09	Tb427_080022900	FALSE
4928	Tb427-080049500	0	0.00990099	7.34123e-10	0.900399	4.10841	FALSE	10464	0.305198	0.723953	1.41273	6.32585e-09	Tb427_080049500	FALSE
8871	Tb427-110128400	0	0.00990099	7.88597e-10	0.843632	4.65602	FALSE	10934.7	0.327255	0.712173	1.67091	6.78712e-09	Tb427_110128400	FALSE
7127	Tb427-100107600	0	0.00990099	7.96863e-10	0.880415	4.35335	FALSE	8604.95	0.219887	0.798429	1.66496	6.85217e-09	Tb427_100107600	FALSE
5658	Tb427-090042600	9.81562e-06	0.00990099	8.5276e-10	0.805635	4.61518	FALSE	17172.9	0.809415	0.405497	1.34726	7.32633e-09	Tb427_090042600	FALSE
5037	Tb427-080061100	0	0.00990099	8.53568e-10	0.0879209	4.60204	FALSE	10972.8	0.332352	0.700131	1.55059	7.32678e-09	Tb427_080061100	TRUE
6269	Tb427-100018600	0	0.00990099	8.54353e-10	0.184668	4.82966	FALSE	12446.1	0.414473	0.641361	1.50645	7.32702e-09	Tb427_100018600	FALSE
2458	Tb427-040019500	0	0.00990099	8.78635e-10	0.352537	4.22266	FALSE	7927.91	0.194361	0.817539	1.91951	7.52861e-09	Tb427_040019500	FALSE
6549	Tb427-100047500	0	0.00990099	8.85582e-10	0.942058	4.34209	FALSE	12737.7	0.432024	0.629581	1.34864	7.58143e-09	Tb427_100047500	FALSE
4461	Tb427-070080200	1.07301e-06	0.00990099	8.9766e-10	0.407234	1.94032	FALSE	10012.2	0.282624	0.741623	1.48262	7.67456e-09	Tb427_070080200	FALSE
1644	Tb427-020017700	0	0.00990099	8.98045e-10	0.4968	4.92898	FALSE	16532.1	0.722434	0.463874	1.331	7.67456e-09	Tb427_020017700	FALSE
4246	Tb427-070057600	0	0.00990099	9.1304e-10	0.0764082	4.67274	FALSE	6394.08	0.140544	0.868455	2.42434	7.79583e-09	Tb427_070057600	FALSE
9032	Tb427-110145200	0	0.00990099	9.23672e-10	0.0543538	3.90251	FALSE	10289.4	0.296255	0.731021	1.47542	7.87967e-09	Tb427_110145200	TRUE
8569	Tb427-110090400	0	0.00990099	9.24491e-10	0.51737	4.80992	FALSE	11828.4	0.375593	0.67356	1.47363	7.87972e-09	Tb427_110090400	FALSE
2922	Tb427-050015200	0	0.00990099	9.38108e-10	0.378454	4.60441	FALSE	13284.1	0.468841	0.603272	1.53561	7.98875e-09	Tb427_050015200	FALSE
4019	Tb427-070034900	0	0.00990099	9.56205e-10	0.916831	3.89473	FALSE	6751.16	0.152518	0.853534	1.98185	8.13571e-09	Tb427_070034900	FALSE
8320	Tb427-110065500	0	0.00990099	9.6244e-10	0.844095	3.67867	FALSE	10804.6	0.32222	0.710602	1.52058	8.18158e-09	Tb427_110065500	TRUE
9230	Tb427-110165200	0	0.00990099	9.67168e-10	0.972791	3.80363	FALSE	10970.1	0.328916	0.709031	1.58838	8.21457e-09	Tb427_110165200	TRUE
3075	Tb427-050031400	0	0.00990099	9.68591e-10	0.580893	4.64173	FALSE	11469.7	0.352185	0.698168	1.51674	8.21945e-09	Tb427_050031400	FALSE
4549	Tb427-080008900	0	0.00990099	9.7554e-10	0.652815	4.02307	FALSE	16047.1	0.683435	0.476963	1.31613	8.27118e-09	Tb427_080008900	FALSE
4232	Tb427-070056200	0	0.00990099	9.83807e-10	0.966131	3.59343	FALSE	11256	0.347908	0.686911	1.47316	8.33398e-09	Tb427_070056200	FALSE
6371	Tb427-100029200	1.44159e-06	0.00990099	9.88683e-10	0.227365	4.88286	FALSE	12522.5	0.422023	0.631545	1.52541	8.36797e-09	Tb427_100029200	FALSE
3678	Tb427-060048900	0	0.00990099	9.92594e-10	0.954635	3.31032	FALSE	11116.9	0.338711	0.696728	1.47607	8.39374e-09	Tb427_060048900	FALSE
6631	Tb427-100055800	0	0.00990099	9.93661e-10	0.295696	3.03696	FALSE	11974.7	0.386142	0.660995	1.34069	8.39544e-09	Tb427_100055800	FALSE
3257	Tb427-050051200	3.23148e-06	0.00990099	1.07766e-09	0.718554	3.36787	FALSE	18636.7	1.01077	0.311518	1.19957	9.0972e-09	Tb427_050051200	FALSE
2296	Tb427-030058600	0	0.00990099	1.10758e-09	0.131163	1.00035	FALSE	10610.6	0.309676	0.726178	1.61099	9.34169e-09	Tb427_030058600	FALSE
3896	Tb427-070020000	0	0.00990099	1.13103e-09	0.649101	4.68559	FALSE	7558.06	0.179797	0.832592	1.73394	9.53116e-09	Tb427_070020000	FALSE
992	Tb427-000766300:pseudogene	0	0.00990099	1.14421e-09	0.547659	4.14143	FALSE	3925.95	0.0707101	0.933639	2.70908	9.63383e-09	Tb427_000766300:pseudogene	FALSE
2124	Tb427-030040500	0	0.00990099	1.17508e-09	0.993223	2.77485	FALSE	6242.76	0.135756	0.869764	1.97396	9.88517e-09	Tb427_030040500	FALSE
2422	Tb427-040015900	5.2686e-07	0.00990099	1.18086e-09	0.381702	3.74311	FALSE	14314.5	0.541792	0.556152	1.39231	9.92518e-09	Tb427_040015900	FALSE
7825	Tb427-110015300	0	0.00990099	1.18513e-09	0.968766	4.42977	FALSE	5819.66	0.122767	0.881283	1.99424	9.95244e-09	Tb427_110015300	FALSE
5477	Tb427-090023500	0	0.00990099	1.26391e-09	0.806608	3.82075	FALSE	10244	0.29487	0.731414	1.53655	1.06048e-08	Tb427_090023500	FALSE
1340	Tb427-010012000	0	0.00990099	1.29552e-09	0.51414	1.00242	FALSE	16106.8	0.690449	0.474607	1.32109	1.08606e-08	Tb427_010012000	FALSE
3782	Tb427-070008400	0	0.00990099	1.29982e-09	0.110074	3.64634	FALSE	7641.15	0.183051	0.827356	1.66794	1.08872e-08	Tb427_070008400	FALSE
9106	Tb427-110152800	0	0.00990099	1.32061e-09	0.27156	4.57779	FALSE	6696.78	0.149852	0.857853	1.93634	1.10519e-08	Tb427_110152800	FALSE
5411	Tb427-090016400	0	0.00990099	1.4059e-09	0.844573	4.71641	FALSE	6162.22	0.133961	0.871728	2.05339	1.17555e-08	Tb427_090016400	FALSE
7984	Tb427-110031400	2.99584e-05	0.00990099	1.41779e-09	0.150749	3.41721	FALSE	17872.5	0.918059	0.340445	1.25206	1.18447e-08	Tb427_110031400	FALSE
7377	Tb427-100134400	0.000990325	0.00990099	1.44756e-09	0.850476	3.56578	FALSE	20214.6	1.38096	0.165445	1.14507	1.20829e-08	Tb427_100134400	FALSE
1448	Tb427-010024300	0	0.00990099	1.45624e-09	0.812917	4.49132	FALSE	9601.58	0.262587	0.761387	1.52987	1.2145e-08	Tb427_010024300	TRUE
8953	Tb427-110137000	0	0.00990099	1.46023e-09	0.662992	3.21648	FALSE	6948.37	0.158754	0.847775	1.72418	1.21678e-08	Tb427_110137000	TRUE
6680	Tb427-100060800	0	0.00990099	1.47842e-09	0.546122	4.75183	FALSE	8666.96	0.223148	0.793848	1.81211	1.23087e-08	Tb427_100060800	FALSE
7859	Tb427-110018700	0	0.00990099	1.66808e-09	0.621647	1.81398	FALSE	11193.4	0.3408	0.698691	1.52793	1.38758e-08	Tb427_110018700	FALSE
7206	Tb427-100116700	0.000279646	0.00990099	1.68031e-09	0.354361	4.28967	FALSE	19718.1	1.2513	0.20445	1.16077	1.39656e-08	Tb427_100116700	FALSE
9485	ND1	6.89953e-05	0.00990099	1.69045e-09	0.857372	4.14309	FALSE	19495.4	1.18732	0.231283	1.17207	1.40378e-08	ND1	FALSE
6600	Tb427-100052700	0	0.00990099	1.75164e-09	0.250101	3.90683	FALSE	6421.61	0.141328	0.865445	2.11775	1.45335e-08	Tb427_100052700	FALSE
2910	Tb427-050014000	3.11341e-06	0.00990099	1.75697e-09	0.61158	3.58594	FALSE	16518	0.737791	0.440576	1.24258	1.45653e-08	Tb427_050014000	FALSE
1680	Tb427-020021300	0	0.00990099	1.77805e-09	0.999188	4.04722	FALSE	14980.3	0.594657	0.523429	1.39784	1.47274e-08	Tb427_020021300	FALSE
4569	Tb427-080010900	0	0.00990099	1.8205e-09	0.26061	4.94535	FALSE	7878.67	0.192843	0.820288	2.45539	1.50533e-08	Tb427_080010900	FALSE
7291	Tb427-100125700	0	0.00990099	1.81905e-09	0.356968	3.855	FALSE	6934.09	0.158774	0.847906	1.85916	1.50533e-08	Tb427_100125700	FALSE
3882	Tb427-070018600	0	0.00990099	1.83396e-09	0.77948	3.92127	FALSE	9219.39	0.246915	0.772513	1.56588	1.51517e-08	Tb427_070018600	FALSE
2297	Tb427-030058700	2.91002e-06	0.00990099	1.92749e-09	0.396677	3.1501	FALSE	18619.1	1.02858	0.295026	1.18624	1.59108e-08	Tb427_030058700	FALSE
3797	Tb427-070009900	0	0.00990099	1.94268e-09	0.0802062	4.71918	FALSE	11571.5	0.360463	0.686387	1.52588	1.60226e-08	Tb427_070009900	FALSE
2866	Tb427-050009500	1.08729e-06	0.00990099	2.07283e-09	0.130253	4.6346	FALSE	12842.6	0.437834	0.625524	1.43368	1.70815e-08	Tb427_050009500	FALSE
5923	Tb427-090069900	0.000156672	0.00990099	2.10976e-09	0.866293	4.25912	FALSE	12410.7	0.412053	0.640707	1.2729	1.7371e-08	Tb427_090069900	FALSE
8728	Tb427-110107600	4.27052e-07	0.00990099	2.143e-09	0.146755	3.90779	FALSE	10918.7	0.326958	0.708377	1.36445	1.76297e-08	Tb427_110107600	FALSE
5341	Tb427-090008100	0	0.00990099	2.19952e-09	0.00496343	4.07623	FALSE	8079.62	0.200738	0.811911	2.09408	1.80794e-08	Tb427_090008100	FALSE
7902	Tb427-110023100	8.30018e-07	0.00990099	2.299e-09	0.651129	3.61458	FALSE	16177.5	0.71623	0.442932	1.22435	1.8881e-08	Tb427_110023100	FALSE
2763	Tb427-040051200	0	0.00990099	2.32243e-09	0.346054	4.6378	FALSE	4102.19	0.0751264	0.926702	3.08845	1.90573e-08	Tb427_040051200	FALSE
8034	Tb427-110036400	2.04574e-06	0.00990099	2.34524e-09	0.0607205	3.78626	FALSE	13066.3	0.454447	0.610079	1.40244	1.92282e-08	Tb427_110036400	FALSE
7670	Tb427-100165200	0	0.00990099	2.38868e-09	0.732302	3.23748	FALSE	9065.98	0.239765	0.77945	1.64054	1.95678e-08	Tb427_100165200	FALSE
7525	Tb427-100150000	0	0.00990099	2.42382e-09	0.412965	4.12573	FALSE	11965.7	0.386187	0.661257	1.49414	1.98389e-08	Tb427_100150000	FALSE
9419	Tb427-110184400	1.01951e-06	0.00990099	2.46161e-09	0.519774	4.37182	FALSE	12253.5	0.402355	0.649869	1.35423	2.01312e-08	Tb427_110184400	FALSE
8829	Tb427-110124200	0	0.00990099	2.56827e-09	0.7352	3.36694	FALSE	11376.2	0.351765	0.689267	1.49847	2.09858e-08	Tb427_110124200	FALSE
1378	Tb427-010015900	0.00399261	0.00990099	2.58019e-09	0.279117	2.79779	FALSE	20585.4	1.48257	0.140183	1.11459	2.10654e-08	Tb427_010015900	FALSE
7673	Tb427-100165500	0	0.00990099	2.66103e-09	0.789149	4.41006	FALSE	9389.67	0.254025	0.768325	1.80588	2.17071e-08	Tb427_100165500	FALSE
3561	Tb427-060036800	1.48159e-06	0.00990099	2.69304e-09	0.0218133	4.6737	FALSE	10123.5	0.28569	0.744634	1.59295	2.19497e-08	Tb427_060036800	FALSE
7590	Tb427-100156500	0.000419817	0.00990099	2.77166e-09	0.599204	3.67124	FALSE	18502.1	1.02539	0.28678	1.20088	2.25716e-08	Tb427_100156500	FALSE
8787	Tb427-110120000	0	0.00990099	2.85476e-09	0.447938	4.14546	FALSE	6299.22	0.137349	0.86767	1.70417	2.32288e-08	Tb427_110120000	FALSE
4689	Tb427-080025400	0	0.00990099	2.92842e-09	0.459457	2.31559	FALSE	8414.79	0.213646	0.799346	1.74423	2.38082e-08	Tb427_080025400	FALSE
3590	Tb427-060039700	0	0.00990099	2.95431e-09	0.166872	4.46971	FALSE	14056.5	0.513402	0.586257	1.41571	2.39985e-08	Tb427_060039700	FALSE
5040	Tb427-080061400	0	0.00990099	3.14818e-09	0.258688	4.06173	FALSE	10188.3	0.288971	0.741754	1.57865	2.55519e-08	Tb427_080061400	TRUE
6820	Tb427-100076200	2.15134e-07	0.00990099	3.15521e-09	0.751441	4.21186	FALSE	12061	0.390703	0.659293	1.4571	2.55875e-08	Tb427_100076200	FALSE
1234	Tb427-000835000	0	0.00990099	3.16552e-09	0.337272	4.64293	FALSE	1470.88	0.0201397	0.980236	13.3486	2.56497e-08	Tb427_000835000	FALSE
8091	Tb427-110042400	0	0.00990099	3.24889e-09	0.411293	4.09232	FALSE	10302.4	0.296537	0.732592	1.50583	2.63033e-08	Tb427_110042400	FALSE
2271	Tb427-030056100	0	0.00990099	3.38807e-09	0.636087	4.36921	FALSE	5932.37	0.126225	0.878534	2.58602	2.74071e-08	Tb427_030056100	TRUE
3410	Tb427-060019000	0.00014833	0.00990099	3.45379e-09	0.847746	4.41653	FALSE	8346.63	0.209605	0.803796	1.4961	2.79155e-08	Tb427_060019000	FALSE
6973	Tb427-100092200	0	0.00990099	3.48436e-09	0.652264	4.51814	FALSE	13548.2	0.489389	0.586126	1.37343	2.81391e-08	Tb427_100092200	FALSE
3310	Tb427-060008600:pseudogene	0	0.00990099	3.57245e-09	0.638233	4.86187	FALSE	6813.68	0.151613	0.865445	2.18045	2.88265e-08	Tb427_060008600:pseudogene	FALSE
5211	Tb427-080078600	0	0.00990099	3.89137e-09	0.818766	4.66413	FALSE	11635.6	0.366664	0.676963	1.49629	3.13737e-08	Tb427_080078600	FALSE
8383	Tb427-110071800	0	0.00990099	3.93062e-09	0.736409	3.86359	FALSE	10687.2	0.314288	0.720026	1.57495	3.16639e-08	Tb427_110071800	FALSE
9421	Tb427-110184600	0	0.00990099	3.94151e-09	0.546451	4.69778	FALSE	5199.36	0.10383	0.901832	2.42145	3.17253e-08	Tb427_110184600	FALSE
4357	Tb427-070068900	0	0.00990099	4.0024e-09	0.394564	4.74745	FALSE	8555.49	0.217098	0.802749	1.8332	3.21886e-08	Tb427_070068900	FALSE
7232	Tb427-100119300	1.79476e-05	0.00990099	4.14311e-09	0.674199	4.07808	FALSE	13534.9	0.488121	0.585602	1.24194	3.32926e-08	Tb427_100119300	FALSE
7422	Tb427-100138900	0	0.00990099	4.18038e-09	0.0807016	4.79911	FALSE	13807.5	0.501937	0.584948	1.44249	3.35642e-08	Tb427_100138900	FALSE
7081	Tb427-100103000	3.15864e-07	0.00990099	4.18622e-09	0.498879	4.61616	FALSE	11585.9	0.364428	0.676963	1.44121	3.35833e-08	Tb427_100103000	FALSE
6718	Tb427-100064600	0.00298692	0.00990099	4.43084e-09	0.724368	2.81013	FALSE	20493.1	1.40823	0.170288	1.13704	3.55164e-08	Tb427_100064600	FALSE
6190	Tb427-100010600	0	0.00990099	4.60271e-09	0.199211	4.43548	FALSE	9517.83	0.259718	0.763351	1.98901	3.68635e-08	Tb427_100010600	FALSE
7441	Tb427-100140800	0	0.00990099	4.69436e-09	0.98827	3.9013	FALSE	8909.48	0.233195	0.785079	1.73624	3.75665e-08	Tb427_100140800	FALSE
5600	Tb427-090036300	1.44547e-06	0.00990099	4.79953e-09	0.784218	4.85467	FALSE	9752.57	0.268985	0.757199	1.58071	3.83764e-08	Tb427_090036300	FALSE
5423	Tb427-090017600	0	0.00990099	4.94259e-09	0.220386	4.48777	FALSE	7729.03	0.187138	0.823822	1.84587	3.94878e-08	Tb427_090017600	TRUE
6701	Tb427-100062900	0	0.00990099	5.00088e-09	0.272792	4.61765	FALSE	10595.9	0.308513	0.727356	1.94059	3.99205e-08	Tb427_100062900	TRUE
5542	Tb427-090030400	0	0.00990099	5.00521e-09	0.920507	3.02435	FALSE	11179.8	0.342128	0.69411	1.44716	3.99222e-08	Tb427_090030400	FALSE
6628	Tb427-100055500	8.07998e-07	0.00990099	5.05505e-09	0.31754	4.77716	FALSE	9861.69	0.273618	0.753665	1.63135	4.02866e-08	Tb427_100055500	FALSE
7645	Tb427-100162700	0.00988276	0.00990099	5.0951e-09	0.136477	1.0006	FALSE	23069.6	2.48401	0.0192408	1.06781	4.05724e-08	Tb427_100162700	FALSE
8382	Tb427-110071700	1.0722e-06	0.00990099	5.18606e-09	0.871792	2.70267	FALSE	7748.5	0.187726	0.821073	1.67247	4.12628e-08	Tb427_110071700	FALSE
3399	Tb427-060017900	0	0.00990099	5.19852e-09	0.159544	4.6934	FALSE	13891	0.509675	0.577487	1.45526	4.13281e-08	Tb427_060017900	FALSE
1407	Tb427-010020100	0	0.00990099	5.65803e-09	0.575719	3.17097	FALSE	13447.9	0.475203	0.605105	1.38628	4.49443e-08	Tb427_010020100	FALSE
5265	Tb427-080084500	0	0.00990099	5.75889e-09	0.798684	4.81008	FALSE	13648.7	0.483235	0.606675	1.4955	4.57079e-08	Tb427_080084500	FALSE
3522	Tb427-060032900	0	0.00990099	5.77985e-09	0.552896	4.67691	FALSE	8398.17	0.212063	0.802487	1.65948	4.58368e-08	Tb427_060032900	FALSE
7996	Tb427-110032600	0	0.00990099	5.81097e-09	0.756138	3.61678	FALSE	7687.85	0.185726	0.824607	1.66242	4.60459e-08	Tb427_110032600	FALSE
2198	Tb427-030048400	5.14392e-06	0.00990099	6.33348e-09	0.560339	4.06906	FALSE	16377.5	0.709202	0.467147	1.30501	5.01452e-08	Tb427_030048400	TRUE
8556	Tb427-110089100	5.05213e-07	0.00990099	6.35712e-09	0.947384	3.45303	FALSE	12610.8	0.426127	0.629581	1.37768	5.02913e-08	Tb427_110089100	FALSE
5091	Tb427-080066500	5.53018e-07	0.00990099	6.37441e-09	0.593155	1.13628	FALSE	13087.4	0.454862	0.611518	1.36958	5.0387e-08	Tb427_080066500	FALSE
5606	Tb427-090036900	0	0.00990099	6.39715e-09	0.758619	4.9344	FALSE	6834.02	0.154467	0.856021	2.23689	5.05255e-08	Tb427_090036900	FALSE
9461	Tb427-110188600	0	0.00990099	6.56027e-09	0.0127049	2.43545	FALSE	8734.78	0.226284	0.788874	1.63888	5.17717e-08	Tb427_110188600	FALSE
6163	Tb427-100007900	0.000154024	0.00990099	6.69396e-09	0.640686	3.73982	FALSE	19626.3	1.19068	0.239791	1.13442	5.27837e-08	Tb427_100007900	FALSE
9415	Tb427-110184000	0	0.00990099	6.76404e-09	0.185031	4.81309	FALSE	4895.58	0.095364	0.909162	3.42755	5.3293e-08	Tb427_110184000	FALSE
9107	Tb427-110152900	4.64993e-06	0.00990099	6.84316e-09	0.659684	3.15437	FALSE	17730.5	0.896325	0.351571	1.22109	5.38725e-08	Tb427_110152900	FALSE
6116	Tb427-090091000	3.74319e-07	0.00990099	6.96196e-09	0.220544	3.49075	FALSE	4685.98	0.0895992	0.912958	1.79814	5.47633e-08	Tb427_090091000	FALSE
4622	Tb427-080018300	7.47593e-06	0.00990099	7.00055e-09	0.25593	1.00011	FALSE	18155.9	0.948294	0.334162	1.19949	5.50222e-08	Tb427_080018300	FALSE
91	Tb427-000073700:pseudogene	0.00444139	0.00990099	7.12039e-09	0.267757	3.55299	FALSE	20086.9	1.3157	0.188874	1.14914	5.59187e-08	Tb427_000073700:pseudogene	FALSE
3497	Tb427-060030400	0	0.00990099	7.16111e-09	0.992384	1.00028	FALSE	16611.9	0.750491	0.434424	1.35508	5.6193e-08	Tb427_060030400	FALSE
4133	Tb427-070046300	0	0.00990099	7.17036e-09	0.132704	4.00815	FALSE	7230.3	0.168294	0.84267	2.47081	5.622e-08	Tb427_070046300	FALSE
8204	Tb427-110053900	0	0.00990099	7.19096e-09	0.865783	3.96197	FALSE	10066	0.284789	0.742016	1.46823	5.6336e-08	Tb427_110053900	FALSE
8027	Tb427-110035700	0	0.00990099	7.36382e-09	0.62879	4.87083	FALSE	14229.4	0.536226	0.55733	1.47462	5.76436e-08	Tb427_110035700	FALSE
6813	Tb427-100075200	0	0.00990099	7.63077e-09	0.567061	2.85719	FALSE	9763.93	0.271118	0.75144	1.47867	5.96851e-08	Tb427_100075200	FALSE
1653	Tb427-020018600	0	0.00990099	7.91371e-09	0.435002	2.21333	FALSE	11647.3	0.365799	0.678927	1.42977	6.18482e-08	Tb427_020018600	FALSE
2000	Tb427-030026600	0.000295493	0.00990099	7.92358e-09	0.513104	4.70683	FALSE	18370.4	0.977032	0.321073	1.20939	6.18754e-08	Tb427_030026600	FALSE
5009	Tb427-080058300	0	0.00990099	7.98172e-09	0.941245	3.65851	FALSE	9803.48	0.271312	0.75445	1.55528	6.22793e-08	Tb427_080058300	FALSE
4543	Tb427-080008300	0	0.00990099	8.07287e-09	0.348913	4.34167	FALSE	12301.9	0.404198	0.650785	1.3801	6.29398e-08	Tb427_080008300	TRUE
4553	Tb427-080009300	1.07735e-06	0.00990099	8.25394e-09	0.749295	2.64083	FALSE	14009	0.518641	0.571466	1.32474	6.42998e-08	Tb427_080009300	FALSE
5689	Tb427-090045700	0	0.00990099	8.36769e-09	0.00781318	4.11823	FALSE	12685	0.426824	0.635733	1.50417	6.51336e-08	Tb427_090045700	FALSE
4567	Tb427-080010700	0	0.00990099	8.59437e-09	0.351719	3.48625	FALSE	9715.75	0.268462	0.755236	1.44353	6.68443e-08	Tb427_080010700	FALSE
8796	Tb427-110120900	8.95564e-05	0.00990099	8.64004e-09	0.923371	4.59621	FALSE	19173.8	1.12592	0.255628	1.19621	6.71456e-08	Tb427_110120900	FALSE
2670	Tb427-040041300	0	0.00990099	8.72412e-09	0.9414	4.67684	FALSE	12130.4	0.392881	0.660733	1.47088	6.77448e-08	Tb427_040041300	FALSE
4763	Tb427-080032800	0	0.00990099	8.80239e-09	0.6221	4.65116	FALSE	10327.5	0.293495	0.74267	1.59613	6.82978e-08	Tb427_080032800	FALSE
9133	Tb427-110155500	9.79599e-07	0.00990099	9.20922e-09	0.398901	3.87632	FALSE	11660.4	0.368974	0.671728	1.36628	7.13972e-08	Tb427_110155500	TRUE
5095	Tb427-080066900	0	0.00990099	9.23029e-09	0.967145	3.45717	FALSE	5398.52	0.109708	0.892932	1.92238	7.15034e-08	Tb427_080066900	TRUE
1846	Tb427-030009900	2.53616e-05	0.00990099	9.27003e-09	0.766907	3.29401	FALSE	20139.1	1.29934	0.207068	1.1886	7.17539e-08	Tb427_030009900	FALSE
4780	Tb427-080034600	0	0.00990099	9.40268e-09	0.180474	1.00031	FALSE	7295.94	0.171089	0.837435	1.87865	7.27226e-08	Tb427_080034600	FALSE
1988	Tb427-030024100	5.08427e-06	0.00990099	9.96365e-09	0.877077	4.75745	FALSE	12979.9	0.448545	0.615445	1.30005	7.69998e-08	Tb427_030024100	FALSE
1643	Tb427-020017600	0	0.00990099	1.01589e-08	0.92675	3.47858	FALSE	13686.4	0.49826	0.580366	1.44304	7.84459e-08	Tb427_020017600	FALSE
4937	Tb427-080050400	0.000224525	0.00990099	1.01715e-08	0.897906	4.20709	FALSE	19384.7	1.14129	0.258377	1.1732	7.84809e-08	Tb427_080050400	FALSE
5579	Tb427-090034200	0	0.00990099	1.13183e-08	0.257737	2.80117	FALSE	9207.88	0.245979	0.77356	1.56889	8.726e-08	Tb427_090034200	TRUE
3261	Tb427-050051600	5.61806e-06	0.00990099	1.14509e-08	0.415974	4.10222	FALSE	16498.1	0.745757	0.429319	1.31574	8.82065e-08	Tb427_050051600	FALSE
2977	Tb427-050021000	2.84617e-06	0.00990099	1.14593e-08	0.584793	3.16998	FALSE	15344.7	0.632827	0.493455	1.25131	8.82065e-08	Tb427_050021000	FALSE
2849	Tb427-050007700	0	0.00990099	1.16331e-08	0.32212	3.96474	FALSE	5972.01	0.126269	0.881152	1.97326	8.94733e-08	Tb427_050007700	FALSE
2873	Tb427-050010200	6.30228e-06	0.00990099	1.1804e-08	0.909346	4.26685	FALSE	9434.9	0.25405	0.770681	1.48531	9.07158e-08	Tb427_050010200	FALSE
1954	Tb427-030020700	1.61526e-07	0.00990099	1.18904e-08	0.446862	4.03695	FALSE	14119.2	0.528291	0.56322	1.35157	9.1307e-08	Tb427_030020700	FALSE
5976	Tb427-090076900	0	0.00990099	1.19131e-08	0.784044	3.93454	FALSE	6611.76	0.147101	0.860995	1.8461	9.14092e-08	Tb427_090076900	FALSE
3700	Tb427-060051300	0	0.00990099	1.19848e-08	0.324396	3.67618	FALSE	7661.91	0.18385	0.828403	1.78053	9.1887e-08	Tb427_060051300	FALSE
2030	Tb427-030029600	7.65645e-06	0.00990099	1.2432e-08	0.12461	4.40199	FALSE	18233.3	0.961649	0.326309	1.23362	9.52396e-08	Tb427_030029600	FALSE
5909	Tb427-090068500	0	0.00990099	1.26243e-08	0.749704	4.56343	FALSE	7477.38	0.176406	0.836518	1.8015	9.66367e-08	Tb427_090068500	FALSE
6410	Tb427-100033100:pseudogene	1.48152e-06	0.00990099	1.28359e-08	0.398281	3.61417	FALSE	10346.4	0.297877	0.731152	1.53335	9.81788e-08	Tb427_100033100:pseudogene	FALSE
6181	Tb427-100009700	0	0.00990099	1.34942e-08	0.747701	4.24325	FALSE	5948.42	0.126757	0.876571	1.81454	1.03133e-07	Tb427_100009700	FALSE
2369	Tb427-040010600	7.46761e-07	0.00990099	1.35677e-08	0.810679	3.15041	FALSE	10515.2	0.306802	0.722906	1.48187	1.03613e-07	Tb427_040010600	TRUE
7286	Tb427-100125200	0.000120565	0.00990099	1.36636e-08	0.726077	3.93677	FALSE	19321.4	1.13002	0.261126	1.16716	1.04263e-07	Tb427_100125200	FALSE
9140	Tb427-110156200	4.79982e-07	0.00990099	1.37635e-08	0.950757	3.64796	FALSE	7434.85	0.175995	0.831937	1.52722	1.04943e-07	Tb427_110156200	FALSE
2043	Tb427-030030900	2.51926e-06	0.00990099	1.39897e-08	0.286448	4.79995	FALSE	14207.1	0.533544	0.560995	1.42214	1.06583e-07	Tb427_030030900	FALSE
4914	Tb427-080048100	1.71432e-06	0.00990099	1.40407e-08	0.981285	3.57717	FALSE	15271.5	0.611129	0.521335	1.30423	1.06888e-07	Tb427_080048100	FALSE
6006	Tb427-090079900	0	0.00990099	1.43745e-08	0.829832	4.94004	FALSE	10143.4	0.28632	0.746597	1.87972	1.09343e-07	Tb427_090079900	FALSE
8759	Tb427-110110700	0	0.00990099	1.4627e-08	0.419595	3.96528	FALSE	9517.37	0.259389	0.763351	1.47132	1.11121e-07	Tb427_110110700	FALSE
4432	Tb427-070077300	0	0.00990099	1.46311e-08	0.986821	3.50802	FALSE	12836.6	0.439046	0.623822	1.38798	1.11121e-07	Tb427_070077300	FALSE
1874	Tb427-030012700	3.05274e-06	0.00990099	1.4649e-08	0.0552331	4.26286	FALSE	12531.5	0.416994	0.642932	1.34504	1.11169e-07	Tb427_030012700	FALSE
8221	Tb427-110055600	4.48721e-06	0.00990099	1.46996e-08	0.0520675	4.20686	FALSE	17198.7	0.818594	0.398037	1.22786	1.11466e-07	Tb427_110055600	FALSE
3082	Tb427-050032100	0.000154163	0.00990099	1.47945e-08	0.722196	4.43743	FALSE	19204.1	1.12469	0.259948	1.19057	1.12098e-07	Tb427_050032100	FALSE
1483	Tb427-010028600	0	0.00990099	1.49134e-08	0.392524	4.17281	FALSE	11556.1	0.360164	0.685995	1.58634	1.12911e-07	Tb427_010028600	FALSE
8122	Tb427-110045500	0	0.00990099	1.50191e-08	0.502956	4.1169	FALSE	11248.4	0.342913	0.698822	1.40131	1.13623e-07	Tb427_110045500	FALSE
2448	Tb427-040018500	0	0.00990099	1.52501e-08	0.596195	4.42896	FALSE	6594.83	0.146155	0.861911	1.71576	1.1528e-07	Tb427_040018500	FALSE
8207	Tb427-110054200	2.27511e-06	0.00990099	1.5646e-08	0.515642	3.08661	FALSE	15037.9	0.602784	0.514791	1.25399	1.1818e-07	Tb427_110054200	FALSE
6706	Tb427-100063400	0	0.00990099	1.58256e-08	0.834754	3.74014	FALSE	7598.38	0.1821	0.826702	1.56739	1.19351e-07	Tb427_100063400	FALSE
5625	Tb427-090039000	3.43315e-06	0.00990099	1.58216e-08	0.0991615	3.87285	FALSE	14131.1	0.53128	0.557592	1.33317	1.19351e-07	Tb427_090039000	FALSE
6671	Tb427-100059800	0	0.00990099	1.59172e-08	0.409275	1.0002	FALSE	7006.3	0.160526	0.847906	1.92905	1.19948e-07	Tb427_100059800	FALSE
2300	Tb427-030059000	0	0.00990099	1.61013e-08	0.19513	4.16316	FALSE	7840.75	0.190478	0.821728	1.90204	1.21241e-07	Tb427_030059000	FALSE
5397	Tb427-090015000	3.89033e-08	0.00990099	1.76908e-08	0.0369618	4.31715	FALSE	12495.9	0.413456	0.647251	1.40673	1.33107e-07	Tb427_090015000	FALSE
2429	Tb427-040016600	0	0.00990099	1.78053e-08	0.736607	4.16289	FALSE	6737.36	0.151668	0.855105	1.67174	1.33864e-07	Tb427_040016600	FALSE
7021	Tb427-100097000	8.74105e-06	0.00990099	1.82491e-08	0.788524	4.78685	FALSE	6025.15	0.128196	0.876309	2.02096	1.37094e-07	Tb427_100097000	FALSE
5218	Tb427-080079300:pseudogene	5.88736e-07	0.00990099	1.85774e-08	0.938895	4.05611	FALSE	14038.6	0.522412	0.567277	1.28417	1.39453e-07	Tb427_080079300:pseudogene	FALSE
8861	Tb427-110127400	0	0.00990099	1.89335e-08	0.131735	4.38697	FALSE	5723.98	0.119612	0.88534	1.98726	1.42016e-07	Tb427_110127400	FALSE
3733	Tb427-060055100	1.45571e-05	0.00990099	1.92798e-08	0.42088	4.12837	FALSE	18301.8	0.954975	0.336649	1.1958	1.44502e-07	Tb427_060055100	FALSE
1649	Tb427-020018200	0	0.00990099	1.93637e-08	0.371468	3.32401	FALSE	10733.8	0.315711	0.720942	1.47834	1.45018e-07	Tb427_020018200	FALSE
2587	Tb427-040032400	0	0.00990099	1.94522e-08	0.569458	2.52181	FALSE	9156.21	0.243926	0.775262	1.61316	1.45569e-07	Tb427_040032400	FALSE
2928	Tb427-050015800	0.0660806	0.00990099	1.95341e-08	0.636706	4.00673	FALSE	21738.1	1.85168	0.0780105	1.08677	1.46069e-07	Tb427_050015800	FALSE
7855	Tb427-110018300	0	0.00990099	1.98305e-08	0.598116	3.3218	FALSE	13040.8	0.450491	0.618194	1.37081	1.48171e-07	Tb427_110018300	FALSE
6123	Tb427-090092200	0	0.00990099	1.98772e-08	0.989341	4.18735	FALSE	5559.74	0.114364	0.891885	2.59143	1.48405e-07	Tb427_090092200	FALSE
4419	Tb427-070075400:pseudogene	0.066443	0.00990099	1.99505e-08	0.485923	2.85155	FALSE	23011.6	2.45465	0.0193717	1.0694	1.48838e-07	Tb427_070075400:pseudogene	FALSE
5754	Tb427-090052200	-1.33944e-07	0.00990099	2.06155e-08	0.375487	4.46103	FALSE	5794.36	0.121449	0.882068	1.96091	1.53562e-07	Tb427_090052200	TRUE
128	Tb427-000110300	3.40565e-06	0.00990099	2.06059e-08	0.373002	2.33532	FALSE	17454	0.848934	0.381152	1.21257	1.53562e-07	Tb427_000110300	FALSE
1817	Tb427-030007000	0	0.00990099	2.07564e-08	0.822511	3.95908	FALSE	7821.5	0.189855	0.82212	1.64625	1.54375e-07	Tb427_030007000	FALSE
6871	Tb427-100081300	0	0.00990099	2.07479e-08	0.985222	3.69085	FALSE	6904.79	0.157162	0.850524	1.59563	1.54375e-07	Tb427_100081300	FALSE
5777	Tb427-090054500	8.9881e-07	0.00990099	2.11239e-08	0.918963	3.99796	FALSE	12871.5	0.441837	0.619503	1.27198	1.56988e-07	Tb427_090054500	FALSE
3625	Tb427-060043200	0	0.00990099	2.19867e-08	0.936324	2.02158	FALSE	10277.8	0.294919	0.734162	1.61087	1.63274e-07	Tb427_060043200	FALSE
3087	Tb427-050032600	6.64703e-05	0.00990099	2.21654e-08	0.590356	3.16353	FALSE	17423.6	0.825577	0.405366	1.21575	1.64476e-07	Tb427_050032600	FALSE
4540	Tb427-080008000	0	0.00990099	2.25009e-08	0.591445	3.93819	FALSE	6341.67	0.138398	0.868063	1.95887	1.66837e-07	Tb427_080008000	FALSE
7708	Tb427-100170200	4.62775e-06	0.00990099	2.26291e-08	0.282424	4.54749	FALSE	5097.65	0.100513	0.903796	1.89357	1.6766e-07	Tb427_100170200	FALSE
1719	Tb427-020025300	2.71797e-07	0.00990099	2.27982e-08	0.827197	3.02974	FALSE	9283.82	0.248378	0.772251	1.43775	1.68783e-07	Tb427_020025300	TRUE
3057	Tb427-050029600	0	0.00990099	2.29197e-08	0.629789	4.71871	FALSE	8334.1	0.210127	0.802618	1.59051	1.69553e-07	Tb427_050029600	FALSE
7901	Tb427-110023000	1.82797e-05	0.00990099	2.38826e-08	0.169532	4.40269	FALSE	14317.1	0.547984	0.544503	1.34042	1.76542e-07	Tb427_110023000	FALSE
6679	Tb427-100060700	0	0.00990099	2.41426e-08	0.34721	4.65155	FALSE	4683.75	0.0894169	0.914921	2.60378	1.78328e-07	Tb427_100060700	TRUE
5561	Tb427-090032300	0.0611407	0.00990099	2.46696e-08	0.935923	2.59139	FALSE	23028	2.3251	0.0384817	1.05839	1.82082e-07	Tb427_090032300	FALSE
1919	Tb427-030017200	9.42399e-07	0.00990099	2.48288e-08	0.978261	4.50564	FALSE	6329.12	0.13659	0.874215	1.86501	1.83117e-07	Tb427_030017200	FALSE
2132	Tb427-030041300	1.27124e-06	0.00990099	2.50743e-08	0.949109	4.11146	FALSE	10569.5	0.310044	0.718848	1.35584	1.84787e-07	Tb427_030041300	FALSE
4023	Tb427-070035300	0	0.00990099	2.57858e-08	0.501561	3.89671	FALSE	9289.8	0.249656	0.770288	1.7042	1.89886e-07	Tb427_070035300	FALSE
4623	Tb427-080018400	1.04067e-05	0.00990099	2.58286e-08	0.921435	1.00018	FALSE	18131.8	0.960944	0.318717	1.19312	1.90057e-07	Tb427_080018400	FALSE
6433	Tb427-100035900	0	0.00990099	2.66937e-08	0.703044	3.14588	FALSE	8276.31	0.207567	0.805628	1.645	1.96274e-07	Tb427_100035900	FALSE
3095	Tb427-050033400	6.84304e-07	0.00990099	2.68975e-08	0.974894	4.16019	FALSE	6125.38	0.131271	0.874869	2.15988	1.97622e-07	Tb427_050033400	FALSE
8909	Tb427-110132500	0	0.00990099	2.75814e-08	0.070616	4.20596	FALSE	6366.33	0.139487	0.86623	1.78105	2.02493e-07	Tb427_110132500	FALSE
4988	Tb427-080056200	0	0.00990099	2.78194e-08	0.135803	4.09243	FALSE	14560.7	0.560828	0.544503	1.39143	2.04086e-07	Tb427_080056200	FALSE
5812	Tb427-090058000	0.00921535	0.00990099	2.78787e-08	0.3913	2.57926	FALSE	22660.4	2.05211	0.0674084	1.07281	2.04367e-07	Tb427_090058000	FALSE
5845	Tb427-090061700	0.000114747	0.00990099	2.80084e-08	0.993537	4.2194	FALSE	15052.4	0.605762	0.509424	1.2623	2.05162e-07	Tb427_090061700	FALSE
4486	Tb427-070082700	0	0.00990099	2.82142e-08	0.520696	4.10272	FALSE	10167.8	0.288528	0.740838	1.57251	2.06358e-07	Tb427_070082700	FALSE
4236	Tb427-070056600	2.27776e-06	0.00990099	2.82e-08	0.143097	3.69086	FALSE	10590.3	0.310503	0.720157	1.39654	2.06358e-07	Tb427_070056600	FALSE
2939	Tb427-050016900	0	0.00990099	2.92473e-08	0.806732	3.90672	FALSE	7945.75	0.195166	0.815445	1.73651	2.13753e-07	Tb427_050016900	FALSE
6909	Tb427-100085200	2.85299e-06	0.00990099	2.96405e-08	0.494554	3.18227	FALSE	18915.1	1.04374	0.30288	1.22039	2.16463e-07	Tb427_100085200	FALSE
7467	Tb427-100143800	0	0.00990099	2.97368e-08	0.692932	4.81812	FALSE	9475.51	0.255211	0.77212	1.84426	2.17003e-07	Tb427_100143800	FALSE
1668	Tb427-020020100	7.47508e-06	0.00990099	3.03926e-08	0.887579	4.59983	FALSE	16313.9	0.715284	0.455759	1.2701	2.21621e-07	Tb427_020020100	FALSE
4626	Tb427-080018900	1.12569e-05	0.00990099	3.06413e-08	0.70832	3.01816	FALSE	12706.2	0.430782	0.62801	1.33122	2.23267e-07	Tb427_080018900	FALSE
3157	Tb427-050039600	0	0.00990099	3.1528e-08	0.197724	3.93093	FALSE	8551.3	0.218213	0.797251	1.64658	2.29555e-07	Tb427_050039600	FALSE
8337	Tb427-110067200	0.00112506	0.00990099	3.15776e-08	0.115108	2.87649	FALSE	21094	1.59457	0.123953	1.11552	2.29744e-07	Tb427_110067200	FALSE
4550	Tb427-080009000	0	0.00990099	3.19702e-08	0.866344	4.08724	FALSE	11957.1	0.383188	0.666099	1.469	2.32426e-07	Tb427_080009000	FALSE
2397	Tb427-040013400	6.0516e-07	0.00990099	3.25094e-08	0.939421	3.92484	FALSE	8197.72	0.203964	0.809817	1.57905	2.36168e-07	Tb427_040013400	FALSE
6740	Tb427-100067000	2.54157e-06	0.00990099	3.31194e-08	0.910743	3.43229	FALSE	11756.9	0.373873	0.668717	1.41713	2.4042e-07	Tb427_100067000	FALSE
1112	Tb427-000801100	3.75012e-06	0.00990099	3.3244e-08	0.284989	3.31865	FALSE	8168.35	0.202639	0.810079	1.54375	2.41143e-07	Tb427_000801100	FALSE
3018	Tb427-050025300	0	0.00990099	3.35295e-08	0.83366	4.45394	FALSE	11845.7	0.376544	0.672644	1.47171	2.43033e-07	Tb427_050025300	TRUE
3491	Tb427-060029800	8.43143e-05	0.00990099	3.36198e-08	0.0343506	3.05681	FALSE	18342.3	0.958937	0.336126	1.19908	2.43505e-07	Tb427_060029800	FALSE
4304	Tb427-070063400	2.00541e-06	0.00990099	3.41877e-08	0.872373	4.3183	FALSE	14463.8	0.551521	0.550916	1.32699	2.47433e-07	Tb427_070063400	FALSE
5124	Tb427-080069800	2.90328e-07	0.00990099	3.64768e-08	0.993799	4.35706	FALSE	10642.1	0.313055	0.718194	1.46178	2.63804e-07	Tb427_080069800	FALSE
7857	Tb427-110018500	1.04636e-05	0.00990099	3.67354e-08	0.785017	4.46619	FALSE	9983.2	0.280577	0.744895	1.66331	2.65476e-07	Tb427_110018500	FALSE
8717	Tb427-110106500	0	0.00990099	3.79676e-08	0.840983	4.85771	FALSE	6232.76	0.135129	0.870157	1.77691	2.74176e-07	Tb427_110106500	FALSE
8001	Tb427-110033100	0	0.00990099	3.85903e-08	0.623797	4.66415	FALSE	7601.11	0.182167	0.82801	1.95832	2.78465e-07	Tb427_110033100	FALSE
4648	Tb427-080021200	0.00136883	0.00990099	3.92572e-08	0.802268	3.09673	FALSE	16635.1	0.760909	0.41911	1.16495	2.83067e-07	Tb427_080021200	FALSE
9433	Tb427-110185800	0	0.00990099	4.02851e-08	0.499706	3.9184	FALSE	9948.81	0.278315	0.748822	1.65852	2.90263e-07	Tb427_110185800	FALSE
7364	Tb427-100133100:pseudogene	0	0.00990099	4.08989e-08	0.980395	3.63891	FALSE	2079.92	0.0307284	0.970681	3.93355	2.94466e-07	Tb427_100133100:pseudogene	FALSE
4656	Tb427-080022000	9.2876e-07	0.00990099	4.10609e-08	0.975437	4.1274	FALSE	9043.92	0.237755	0.781937	1.43229	2.95413e-07	Tb427_080022000	TRUE
5238	Tb427-080081300	0	0.00990099	4.19685e-08	0.921211	4.39145	FALSE	5676.57	0.117907	0.887042	2.15881	3.01718e-07	Tb427_080081300	FALSE
1467	Tb427-010027000	1.83094e-06	0.00990099	4.44563e-08	0.425251	3.6442	FALSE	8669.72	0.223599	0.790707	1.54058	3.19367e-07	Tb427_010027000	FALSE
1387	Tb427-010016800	0.163073	0.00990099	4.47484e-08	0.740838	2.68275	FALSE	23837.5	2.8671	0.0121728	1.04786	3.21227e-07	Tb427_010016800	FALSE
6277	Tb427-100019400	9.96122e-07	0.00990099	4.50276e-08	0.539437	1.00048	FALSE	13521.5	0.487757	0.584948	1.33144	3.22992e-07	Tb427_100019400	FALSE
6667	Tb427-100059400	0	0.00990099	4.57302e-08	0.566771	4.68083	FALSE	6537.41	0.144325	0.865707	1.96391	3.27789e-07	Tb427_100059400	TRUE
350	Tb427-000347900	0	0.00990099	4.68992e-08	0.729144	3.95065	FALSE	2848.5	0.0460791	0.956414	3.78806	3.3592e-07	Tb427_000347900	FALSE
8878	Tb427-110129200	0.000121516	0.00990099	4.69454e-08	0.504642	2.78	FALSE	18189.1	0.964792	0.319503	1.17865	3.36003e-07	Tb427_110129200	FALSE
1334	Tb427-010011400	3.14904e-07	0.00990099	4.88392e-08	0.553758	3.72888	FALSE	7255.67	0.169269	0.839005	1.79581	3.493e-07	Tb427_010011400	FALSE
4618	Tb427-080017900	0	0.00990099	5.04535e-08	0.906742	3.65559	FALSE	9224.69	0.247001	0.771728	1.43097	3.60313e-07	Tb427_080017900	FALSE
1782	Tb427-020031600	0.000700086	0.00990099	5.04404e-08	0.469359	4.61922	FALSE	14875.5	0.567424	0.558508	1.24093	3.60313e-07	Tb427_020031600	FALSE
3403	Tb427-060018300	1.30472e-06	0.00990099	5.3265e-08	0.825286	4.91051	FALSE	17129.7	0.806284	0.406937	1.29468	3.80112e-07	Tb427_060018300	FALSE
5543	Tb427-090030500	0	0.00990099	5.42797e-08	0.144067	3.95619	FALSE	7283.97	0.171221	0.83678	2.08638	3.87067e-07	Tb427_090030500	FALSE
5448	Tb427-090020600	0	0.00990099	5.51732e-08	0.992392	3.9501	FALSE	9261.3	0.249332	0.768717	1.63522	3.93149e-07	Tb427_090020600	FALSE
5268	Tb427-080084800	0	0.00990099	5.69101e-08	0.689607	3.55103	FALSE	13258.3	0.46038	0.617801	1.42277	4.05228e-07	Tb427_080084800	FALSE
6474	Tb427-100040000	5.94875e-07	0.00990099	5.70207e-08	0.373942	4.09766	FALSE	13941.7	0.512108	0.576702	1.36116	4.05718e-07	Tb427_100040000	FALSE
5540	Tb427-090030200	2.12225e-06	0.00990099	5.89464e-08	0.961488	4.21934	FALSE	12877.8	0.441744	0.62055	1.32849	4.19112e-07	Tb427_090030200	FALSE
3879	Tb427-070018300	5.41754e-07	0.00990099	5.91201e-08	0.467795	2.47704	FALSE	7036.04	0.16169	0.84555	1.78099	4.20039e-07	Tb427_070018300	FALSE
5680	Tb427-090044800	0.00158771	0.00990099	6.13711e-08	0.780429	4.76904	FALSE	18182.2	0.934211	0.349476	1.25113	4.35712e-07	Tb427_090044800	FALSE
6803	Tb427-100073300	0.000369895	0.00990099	6.15529e-08	0.624664	4.2418	FALSE	15281.6	0.62375	0.500785	1.20084	4.36683e-07	Tb427_100073300	FALSE
4841	Tb427-080040800	0	0.00990099	6.22356e-08	0.989709	3.42706	FALSE	10468.2	0.303493	0.727618	1.43402	4.41203e-07	Tb427_080040800	FALSE
6794	Tb427-100072400	0	0.00990099	6.38644e-08	0.465781	3.79571	FALSE	9652.6	0.264795	0.759817	1.63198	4.52419e-07	Tb427_100072400	FALSE
9367	Tb427-110179100	0	0.00990099	6.48971e-08	0.866399	4.48886	FALSE	10788	0.321226	0.711257	1.56647	4.59399e-07	Tb427_110179100	FALSE
3554	Tb427-060036100	1.86283e-05	0.00990099	6.68621e-08	0.602748	3.82644	FALSE	10228.9	0.292021	0.735864	1.53835	4.72964e-07	Tb427_060036100	FALSE
3259	Tb427-050051400	0	0.00990099	6.97205e-08	0.743789	2.95443	FALSE	7354.96	0.173246	0.835079	1.73403	4.92824e-07	Tb427_050051400	FALSE
6412	Tb427-100033500	0.000285135	0.00990099	7.00938e-08	0.12619	3.79408	FALSE	15896.9	0.684354	0.462827	1.25185	4.95101e-07	Tb427_100033500	FALSE
6356	Tb427-100027700	0	0.00990099	7.05988e-08	0.58958	3.95616	FALSE	9042.32	0.238524	0.780759	1.79069	4.98305e-07	Tb427_100027700	FALSE
6312	Tb427-100022900	8.83739e-07	0.00990099	7.32545e-08	0.451207	2.82835	FALSE	8092.69	0.200817	0.809293	1.481	5.16674e-07	Tb427_100022900	FALSE
6539	Tb427-100046500	0	0.00990099	7.38652e-08	0.977693	4.48164	FALSE	3517.7	0.0608853	0.941099	3.22988	5.20602e-07	Tb427_100046500	TRUE
2479	Tb427-040021600	2.22967e-05	0.00990099	7.40065e-08	0.41732	4.86998	FALSE	15728.5	0.660701	0.482984	1.29961	5.21219e-07	Tb427_040021600	FALSE
3407	Tb427-060018700	0	0.00990099	7.56482e-08	0.715466	4.49485	FALSE	6706.21	0.149495	0.861911	1.83562	5.32394e-07	Tb427_060018700	FALSE
1496	Tb427-010029900	2.50244e-07	0.00990099	7.62743e-08	0.45162	4.5637	FALSE	8431.08	0.213247	0.801832	1.5326	5.36411e-07	Tb427_010029900	FALSE
1918	Tb427-030017100	0	0.00990099	7.67777e-08	0.235079	2.45868	FALSE	8706.13	0.224939	0.790445	1.58566	5.39559e-07	Tb427_030017100	FALSE
5000	Tb427-080057400	0	0.00990099	7.77068e-08	0.940571	3.85561	FALSE	6374.37	0.139924	0.864267	1.76273	5.45693e-07	Tb427_080057400	FALSE
8565	Tb427-110090000	0	0.00990099	7.80147e-08	0.620085	4.64177	FALSE	7832.62	0.189385	0.825785	1.75122	5.47459e-07	Tb427_110090000	TRUE
4081	Tb427-070041100	2.7896e-07	0.00990099	7.84536e-08	0.312916	1.41487	FALSE	8514.29	0.215958	0.8	1.60109	5.5014e-07	Tb427_070041100	FALSE
7491	Tb427-100146400	9.73769e-07	0.00990099	7.87087e-08	0.218258	4.37208	FALSE	11683.2	0.370084	0.670681	1.49549	5.5153e-07	Tb427_100146400	FALSE
4731	Tb427-080029600	0.000717433	0.00990099	8.04096e-08	0.752397	3.89212	FALSE	19303.2	1.13786	0.25589	1.15318	5.63041e-07	Tb427_080029600	FALSE
8008	Tb427-110033800	0	0.00990099	8.26025e-08	0.944711	4.45595	FALSE	7975.78	0.196257	0.814921	1.52585	5.77979e-07	Tb427_110033800	FALSE
9287	Tb427-110170900	1.73681e-06	0.00990099	8.324e-08	0.273995	4.74917	FALSE	11525.6	0.35801	0.686126	1.52913	5.8202e-07	Tb427_110170900	FALSE
3065	Tb427-050030400	3.61577e-07	0.00990099	8.75424e-08	0.235824	3.55355	FALSE	10284.9	0.295994	0.730497	1.53983	6.11661e-07	Tb427_050030400	FALSE
6296	Tb427-100021300	1.06055e-05	0.00990099	8.88251e-08	0.612679	3.45285	FALSE	12339.2	0.408575	0.642277	1.35929	6.20176e-07	Tb427_100021300	FALSE
7776	Tb427-110010300	0	0.00990099	9.04857e-08	0.725904	3.50569	FALSE	8990.14	0.237192	0.779843	1.6806	6.30861e-07	Tb427_110010300	FALSE
4794	Tb427-080036000	0.00195271	0.00990099	9.04704e-08	0.210668	1.0013	FALSE	21561	1.83457	0.0718586	1.09478	6.30861e-07	Tb427_080036000	FALSE
8103	Tb427-110043600	6.28814e-06	0.00990099	9.09904e-08	0.942593	2.57567	FALSE	12654.7	0.425301	0.635209	1.31063	6.33924e-07	Tb427_110043600	FALSE
5564	Tb427-090032600	2.66627e-05	0.00990099	9.13621e-08	0.959912	4.3906	FALSE	10520	0.305042	0.728665	1.5	6.36056e-07	Tb427_090032600	FALSE
6852	Tb427-100079400	0	0.00990099	9.26891e-08	0.927712	3.5133	FALSE	11547.2	0.364452	0.673429	1.54512	6.44831e-07	Tb427_100079400	FALSE
4879	Tb427-080044600	3.85159e-07	0.00990099	9.29613e-08	0.890077	4.26511	FALSE	10644.3	0.311405	0.723298	1.61333	6.46261e-07	Tb427_080044600	FALSE
4216	Tb427-070054600	0.00051814	0.00990099	9.321e-08	0.96291	4.57501	FALSE	19816.8	1.23097	0.226571	1.17618	6.47526e-07	Tb427_070054600	FALSE
4682	Tb427-080024700	4.30563e-07	0.00990099	9.72008e-08	0.39558	3.22109	FALSE	11180.6	0.342541	0.692539	1.41819	6.74766e-07	Tb427_080024700	FALSE
6395	Tb427-100031600	0	0.00990099	1.02268e-07	0.925164	4.90128	FALSE	12009	0.386043	0.666099	1.58276	7.09434e-07	Tb427_100031600	FALSE
6152	Tb427-100006800	4.14083e-07	0.00990099	1.0722e-07	0.653714	4.11198	FALSE	5715.96	0.118577	0.887565	2.00399	7.43024e-07	Tb427_100006800	FALSE
9006	Tb427-110142300	2.24892e-08	0.00990099	1.07264e-07	0.631008	3.1187	FALSE	9614.07	0.263211	0.759293	1.43233	7.43024e-07	Tb427_110142300	FALSE
4727	Tb427-080029200	0	0.00990099	1.08118e-07	0.628506	4.90138	FALSE	8850.78	0.229266	0.791623	1.80931	7.48411e-07	Tb427_080029200	FALSE
7765	Tb427-110009200	0.297009	0.00990099	1.10419e-07	0.582145	2.36122	FALSE	24543.5	3.41234	0.00235602	1.037	7.6379e-07	Tb427_110009200	FALSE
2285	Tb427-030057500	1.02319e-06	0.00990099	1.1079e-07	0.803965	4.91751	FALSE	13684.1	0.483573	0.60877	1.5801	7.6581e-07	Tb427_030057500	FALSE
8353	Tb427-110068800	1.78887e-07	0.00990099	1.12675e-07	0.110569	4.45269	FALSE	8357.74	0.210751	0.802618	1.64866	7.78288e-07	Tb427_110068800	FALSE
8543	Tb427-110087800	1.79863e-06	0.00990099	1.14136e-07	0.438965	4.08561	FALSE	12611.8	0.42715	0.627487	1.28876	7.87814e-07	Tb427_110087800	FALSE
6652	Tb427-100057900	0	0.00990099	1.14524e-07	0.71882	3.90265	FALSE	11770.4	0.373602	0.672513	1.48839	7.89931e-07	Tb427_100057900	FALSE
9097	Tb427-110151900	0	0.00990099	1.17453e-07	0.345905	4.51446	FALSE	8020.18	0.197178	0.817147	1.77933	8.09558e-07	Tb427_110151900	FALSE
1479	Tb427-010028200	0.000465048	0.00990099	1.18833e-07	0.440851	2.12897	FALSE	19510.2	1.17742	0.242016	1.13542	8.18485e-07	Tb427_010028200	FALSE
8053	Tb427-110038400	0	0.00990099	1.20909e-07	0.982517	4.23641	FALSE	7391.79	0.173851	0.83678	1.81443	8.32195e-07	Tb427_110038400	FALSE
8939	Tb427-110135500	4.97229e-05	0.00990099	1.24941e-07	0.830359	3.06649	FALSE	14147.4	0.529777	0.560733	1.20928	8.59336e-07	Tb427_110135500	FALSE
8566	Tb427-110090100	0	0.00990099	1.26595e-07	0.995981	4.6987	FALSE	6631.53	0.147537	0.861387	2.06518	8.70094e-07	Tb427_110090100	FALSE
8589	Tb427-110092400	1.35534e-06	0.00990099	1.27258e-07	0.109366	4.75604	FALSE	7384.47	0.172989	0.838743	2.00788	8.74032e-07	Tb427_110092400	FALSE
2091	Tb427-030037200	1.07619e-06	0.00990099	1.28763e-07	0.409083	4.40696	FALSE	8327.71	0.20867	0.80733	1.62578	8.83742e-07	Tb427_030037200	TRUE
8110	Tb427-110044300	0	0.00990099	1.34844e-07	0.55172	3.99834	FALSE	9719.74	0.268861	0.753927	1.44249	9.24819e-07	Tb427_110044300	FALSE
8991	Tb427-110140800	3.38909e-07	0.00990099	1.35641e-07	0.845734	4.42198	FALSE	12661.1	0.424647	0.63822	1.3412	9.29629e-07	Tb427_110140800	FALSE
4177	Tb427-070050700	0.000747027	0.00990099	1.36755e-07	0.103098	1.00062	FALSE	22056.4	1.92764	0.0705497	1.10251	9.36602e-07	Tb427_070050700	FALSE
8402	Tb427-110073700	0.00400865	0.00990099	1.37019e-07	0.871081	4.30286	FALSE	21002.1	1.5445	0.13966	1.15668	9.37747e-07	Tb427_110073700	FALSE
3340	Tb427-060011600	0	0.00990099	1.40135e-07	0.0265283	4.61403	FALSE	11714	0.36746	0.683115	1.80251	9.58397e-07	Tb427_060011600	FALSE
3665	Tb427-060047200	0	0.00990099	1.43662e-07	0.741426	4.49009	FALSE	7959.07	0.195616	0.817147	1.85202	9.81825e-07	Tb427_060047200	FALSE
2294	Tb427-030058400	8.27083e-06	0.00990099	1.45368e-07	0.561326	4.80361	FALSE	13987.4	0.517672	0.569895	1.29305	9.92782e-07	Tb427_030058400	FALSE
3444	Tb427-060023500	0	0.00990099	1.461e-07	0.29424	3.83452	FALSE	7007.69	0.160777	0.846597	1.64803	9.97078e-07	Tb427_060023500	FALSE
2601	Tb427-040033800	1.30264e-06	0.00990099	1.48232e-07	0.49521	4.71163	FALSE	7887.63	0.191439	0.822775	2.18404	1.01092e-06	Tb427_040033800	FALSE
9258	Tb427-110168000	0	0.00990099	1.49565e-07	0.177401	4.85248	FALSE	9147.47	0.242851	0.777618	1.7069	1.0193e-06	Tb427_110168000	FALSE
5739	Tb427-090050700	6.5439e-06	0.00990099	1.51388e-07	0.408842	4.52475	FALSE	11027	0.330759	0.707984	1.64546	1.03099e-06	Tb427_090050700	FALSE
4898	Tb427-080046500	5.09466e-07	0.00990099	1.52504e-07	0.96898	4.49788	FALSE	10761.4	0.317606	0.718063	1.45948	1.03786e-06	Tb427_080046500	FALSE
8655	Tb427-110100100	1.84521e-07	0.00990099	1.52948e-07	0.694585	3.18408	FALSE	11446.9	0.355526	0.685602	1.34042	1.04015e-06	Tb427_110100100	FALSE
7351	Tb427-100131700	2.59995e-07	0.00990099	1.54402e-07	0.70766	4.91735	FALSE	12981.7	0.44535	0.623168	1.52535	1.0493e-06	Tb427_100131700	FALSE
4655	Tb427-080021900	6.49738e-07	0.00990099	1.55021e-07	0.269453	4.0118	FALSE	10308.1	0.295229	0.735209	1.65416	1.05278e-06	Tb427_080021900	FALSE
8250	Tb427-110058500	2.16146e-05	0.00990099	1.56536e-07	0.120535	3.19242	FALSE	14505.3	0.557	0.544895	1.26054	1.06232e-06	Tb427_110058500	FALSE
4235	Tb427-070056500	0	0.00990099	1.58673e-07	0.766473	4.02702	FALSE	8537.08	0.217217	0.799346	1.49302	1.07607e-06	Tb427_070056500	FALSE
3366	Tb427-060014600	1.55676e-05	0.00990099	1.66814e-07	0.62571	4.85383	FALSE	7001.95	0.159969	0.848298	1.8678	1.13049e-06	Tb427_060014600	FALSE
8003	Tb427-110033300	0	0.00990099	1.70339e-07	0.0684769	3.83227	FALSE	8806.87	0.228931	0.787827	1.48684	1.15357e-06	Tb427_110033300	FALSE
6665	Tb427-100059200	6.78362e-06	0.00990099	1.71084e-07	0.800831	4.9414	FALSE	10586	0.308402	0.725131	1.60164	1.15781e-06	Tb427_100059200	FALSE
2362	Tb427-040009900	5.07718e-06	0.00990099	1.72358e-07	0.855669	4.65685	FALSE	9352.58	0.250391	0.773429	1.74408	1.16561e-06	Tb427_040009900	FALSE
2461	Tb427-040019800	0	0.00990099	1.75776e-07	0.597342	4.48353	FALSE	6599.15	0.146843	0.860079	1.85235	1.1879e-06	Tb427_040019800	FALSE
4825	Tb427-080039100	2.21054e-07	0.00990099	1.79913e-07	0.330453	4.18271	FALSE	16257	0.704759	0.466361	1.2751	1.21501e-06	Tb427_080039100	FALSE
8547	Tb427-110088200	7.1738e-07	0.00990099	1.80061e-07	0.498668	3.96192	FALSE	4712.78	0.0903228	0.912958	2.32216	1.21516e-06	Tb427_110088200	FALSE
4817	Tb427-080038300	0	0.00990099	1.81389e-07	0.518416	4.11467	FALSE	12438.2	0.412622	0.643455	1.34936	1.22327e-06	Tb427_080038300	FALSE
2441	Tb427-040017800	1.03781e-06	0.00990099	1.82438e-07	0.357586	2.66656	FALSE	11807.2	0.375903	0.669372	1.36598	1.22949e-06	Tb427_040017800	FALSE
2288	Tb427-030057800	8.48152e-05	0.00990099	1.8793e-07	0.662043	4.76656	FALSE	9313.77	0.249039	0.773168	1.4762	1.26562e-06	Tb427_030057800	TRUE
9231	Tb427-110165300	1.31995e-06	0.00990099	1.94888e-07	0.226292	4.6558	FALSE	7805.64	0.188414	0.824607	1.66668	1.31157e-06	Tb427_110165300	FALSE
5132	Tb427-080070600	0	0.00990099	2.00248e-07	0.563857	4.09219	FALSE	6077.44	0.129764	0.875916	1.79895	1.34671e-06	Tb427_080070600	FALSE
5745	Tb427-090051300	0	0.00990099	2.02628e-07	0.455341	4.53012	FALSE	6159.79	0.132342	0.875393	2.47255	1.36131e-06	Tb427_090051300	FALSE
7171	Tb427-100113200	1.66276e-07	0.00990099	2.02701e-07	0.242761	4.04681	FALSE	9466.2	0.25607	0.767539	1.42051	1.36131e-06	Tb427_100113200	FALSE
4052	Tb427-070038200	1.08145e-05	0.00990099	2.03907e-07	0.900595	4.14803	FALSE	7799.33	0.18776	0.826178	1.56817	1.36847e-06	Tb427_070038200	FALSE
4251	Tb427-070058100	0	0.00990099	2.04601e-07	0.904422	4.12894	FALSE	7945.79	0.194093	0.818586	1.59236	1.37217e-06	Tb427_070058100	FALSE
2419	Tb427-040015600	0.000378628	0.00990099	2.06947e-07	0.410811	3.83938	FALSE	19540.4	1.15073	0.260079	1.14565	1.38694e-06	Tb427_040015600	TRUE
7867	Tb427-110019500	0	0.00990099	2.07479e-07	0.275179	3.92244	FALSE	6555.27	0.144097	0.867277	2.12551	1.38955e-06	Tb427_110019500	FALSE
7406	Tb427-100137300	-2.09877e-07	0.00990099	2.11222e-07	0.309357	1.71948	FALSE	8256.78	0.206496	0.806545	1.65658	1.41282e-06	Tb427_100137300	FALSE
6997	Tb427-100094600	2.23922e-06	0.00990099	2.11245e-07	0.773621	4.54377	FALSE	11203.1	0.34364	0.692408	1.55648	1.41282e-06	Tb427_100094600	FALSE
5002	Tb427-080057600	0	0.00990099	2.11932e-07	0.624826	1.00012	FALSE	6947.91	0.158404	0.849869	1.80762	1.41547e-06	Tb427_080057600	FALSE
6509	Tb427-100043500	6.31574e-07	0.00990099	2.11933e-07	0.509369	3.7771	FALSE	7707.77	0.186097	0.823037	1.54441	1.41547e-06	Tb427_100043500	FALSE
6350	Tb427-100027100	0.000109413	0.00990099	2.1298e-07	0.291992	4.75228	FALSE	14410.4	0.54531	0.556545	1.31315	1.42148e-06	Tb427_100027100	FALSE
2715	Tb427-040046400	9.11469e-07	0.00990099	2.1364e-07	0.335061	3.82472	FALSE	6298.42	0.136756	0.870026	2.18964	1.4249e-06	Tb427_040046400	FALSE
4882	Tb427-080044900	5.16153e-07	0.00990099	2.2867e-07	0.372015	3.72033	FALSE	8886.63	0.232531	0.783115	1.6429	1.5241e-06	Tb427_080044900	FALSE
7155	Tb427-100110400	6.91338e-07	0.00990099	2.29181e-07	0.534334	4.24405	FALSE	6227.15	0.134505	0.87055	1.65507	1.52646e-06	Tb427_100110400	TRUE
3761	Tb427-070006300	0	0.00990099	2.32238e-07	0.760962	4.33441	FALSE	7263.21	0.168769	0.842147	1.73154	1.54575e-06	Tb427_070006300	FALSE
8414	Tb427-110074900	3.2014e-07	0.00990099	2.32828e-07	0.509438	4.32384	FALSE	10027.9	0.282017	0.745288	1.40109	1.54862e-06	Tb427_110074900	FALSE
2737	Tb427-040048600	4.20896e-07	0.00990099	2.40421e-07	0.18184	4.02438	FALSE	12857.9	0.43884	0.625	1.3632	1.59802e-06	Tb427_040048600	FALSE
6264	Tb427-100018100	7.11391e-06	0.00990099	2.55176e-07	0.222227	1.00164	FALSE	19080.6	1.11343	0.260079	1.18369	1.69494e-06	Tb427_100018100	FALSE
272	Tb427-000276300	1.34148e-06	0.00990099	2.55363e-07	0.0832769	3.63331	FALSE	5500.34	0.112195	0.892408	1.87977	1.69502e-06	Tb427_000276300	FALSE
5194	Tb427-080076900	0	0.00990099	2.58035e-07	0.572442	4.06167	FALSE	7323.46	0.171765	0.837173	1.8414	1.71158e-06	Tb427_080076900	FALSE
6017	Tb427-090081000	9.07094e-07	0.00990099	2.58254e-07	0.338809	4.60321	FALSE	13054.4	0.453711	0.611911	1.38017	1.71186e-06	Tb427_090081000	FALSE
1276	Tb427-010005600	1.89e-06	0.00990099	2.59343e-07	0.563711	4.56583	FALSE	8595.02	0.219467	0.796728	1.48445	1.7179e-06	Tb427_010005600	FALSE
3215	Tb427-050045400	0	0.00990099	2.66692e-07	0.709312	4.04025	FALSE	6798.32	0.153335	0.855236	2.13509	1.76538e-06	Tb427_050045400	FALSE
1460	Tb427-010026000	0.0241255	0.00990099	2.7127e-07	0.244281	2.27793	FALSE	22211.8	2.05512	0.0493455	1.06722	1.79445e-06	Tb427_010026000	FALSE
3756	Tb427-070005800	3.17069e-06	0.00990099	2.7597e-07	0.525424	3.26115	FALSE	12285.5	0.40494	0.64712	1.31688	1.8243e-06	Tb427_070005800	FALSE
8290	Tb427-110062500	1.30895e-06	0.00990099	2.79785e-07	0.183409	4.17778	FALSE	6567.76	0.145068	0.863482	1.77902	1.84826e-06	Tb427_110062500	FALSE
5966	Tb427-090075900	4.94801e-06	0.00990099	2.80836e-07	0.118559	2.85283	FALSE	8635.76	0.222073	0.791361	1.51553	1.85394e-06	Tb427_090075900	FALSE
2114	Tb427-030039500	8.3303e-06	0.00990099	2.8109e-07	0.339094	4.87247	FALSE	12231	0.399159	0.654712	1.44342	1.85435e-06	Tb427_030039500	FALSE
7501	Tb427-100147400	4.07496e-07	0.00990099	2.83868e-07	0.46434	3.26609	FALSE	8824.7	0.229331	0.787042	1.51724	1.8714e-06	Tb427_100147400	FALSE
8426	Tb427-110076100	5.92754e-07	0.00990099	2.86456e-07	0.601354	4.2074	FALSE	7923.51	0.193275	0.820157	1.80238	1.88718e-06	Tb427_110076100	FALSE
4976	Tb427-080054700	1.42082e-06	0.00990099	2.90585e-07	0.256418	3.64983	FALSE	9209.32	0.245519	0.773953	1.46453	1.91309e-06	Tb427_080054700	FALSE
7889	Tb427-110021800	0.000155275	0.00990099	2.93293e-07	0.628556	4.54531	FALSE	19795.3	1.20585	0.23966	1.19156	1.9296e-06	Tb427_110021800	FALSE
7751	Tb427-110007800	6.16989e-07	0.00990099	2.9987e-07	0.662951	1.00103	FALSE	7104.49	0.163197	0.846335	1.63994	1.97153e-06	Tb427_110007800	FALSE
3218	Tb427-050045700	1.50062e-06	0.00990099	3.01721e-07	0.520988	3.47205	FALSE	11859.4	0.375767	0.674869	1.49903	1.98236e-06	Tb427_050045700	FALSE
1469	Tb427-010027200	0	0.00990099	3.02393e-07	0.670509	2.42577	FALSE	7796.09	0.189383	0.820288	1.60339	1.98543e-06	Tb427_010027200	FALSE
4439	Tb427-070078000	1.99278e-05	0.00990099	3.10599e-07	0.768551	4.76147	FALSE	18701.9	1.01447	0.308901	1.19413	2.03792e-06	Tb427_070078000	FALSE
4020	Tb427-070035000	1.84862e-06	0.00990099	3.12022e-07	0.27132	3.88726	FALSE	15658.7	0.648369	0.49699	1.32788	2.04588e-06	Tb427_070035000	FALSE
5852	Tb427-090062400	0	0.00990099	3.15836e-07	0.668556	3.44742	FALSE	10772.1	0.317553	0.720157	1.57474	2.06948e-06	Tb427_090062400	FALSE
3272	Tb427-050052700:pseudogene	1.85247e-06	0.00990099	3.28559e-07	0.447644	4.69042	FALSE	8702.26	0.223817	0.79411	1.68549	2.1514e-06	Tb427_050052700:pseudogene	FALSE
7963	Tb427-110029300	0	0.00990099	3.38299e-07	0.0534692	3.97381	FALSE	7641.05	0.182656	0.830105	1.86845	2.21368e-06	Tb427_110029300	FALSE
2033	Tb427-030029900	8.4718e-05	0.00990099	3.43951e-07	0.300358	4.38368	FALSE	12992.4	0.435304	0.644895	1.28626	2.24915e-06	Tb427_030029900	FALSE
6638	Tb427-100056500	4.63492e-06	0.00990099	3.48208e-07	0.991446	3.96383	FALSE	12321	0.406597	0.646204	1.30999	2.27544e-06	Tb427_100056500	FALSE
7994	Tb427-110032400	3.41319e-06	0.00990099	3.55284e-07	0.100495	3.39797	FALSE	11773.6	0.36857	0.683901	1.33434	2.32012e-06	Tb427_110032400	FALSE
5734	Tb427-090050200	0	0.00990099	3.65826e-07	0.918511	4.15285	FALSE	8830.04	0.228995	0.789921	1.53267	2.38735e-06	Tb427_090050200	TRUE
8994	Tb427-110141100	0	0.00990099	3.67642e-07	0.942159	1.00037	FALSE	8141.15	0.203207	0.806675	1.6971	2.39759e-06	Tb427_110141100	FALSE
9311	Tb427-110173300	1.00177e-07	0.00990099	3.81306e-07	0.0981241	4.13118	FALSE	6959.34	0.157888	0.853141	1.69834	2.48503e-06	Tb427_110173300	FALSE
7082	Tb427-100103100	7.62273e-08	0.00990099	3.85428e-07	0.556049	3.30794	FALSE	10882.6	0.323713	0.712958	1.39125	2.51021e-06	Tb427_100103100	FALSE
5445	Tb427-090020300	3.1398e-06	0.00990099	3.96854e-07	0.807748	3.99166	FALSE	10410.8	0.299515	0.733115	1.47708	2.58115e-06	Tb427_090020300	FALSE
4182	Tb427-070051200	0.00101452	0.00990099	3.9664e-07	0.267967	3.41309	FALSE	18599.2	1.01037	0.307723	1.15542	2.58115e-06	Tb427_070051200	FALSE
6927	Tb427-100087000	0.00081067	0.00990099	3.9955e-07	0.246033	4.66827	FALSE	16357.2	0.729941	0.437958	1.20688	2.59694e-06	Tb427_100087000	FALSE
5029	Tb427-080060300	2.09232e-05	0.00990099	4.0831e-07	0.817365	3.66402	FALSE	12621.7	0.422155	0.639529	1.39725	2.6521e-06	Tb427_080060300	FALSE
7791	Tb427-110011800	1.40738e-07	0.00990099	4.23071e-07	0.871961	3.38053	FALSE	14615.6	0.569796	0.533377	1.33307	2.74614e-06	Tb427_110011800	FALSE
7559	Tb427-100153400	1.49607e-05	0.00990099	4.23572e-07	0.71358	3.57518	FALSE	11417.9	0.354995	0.683246	1.47224	2.74755e-06	Tb427_100153400	FALSE
7094	Tb427-100104300	8.14986e-07	0.00990099	4.25412e-07	0.725405	3.63229	FALSE	13850	0.505764	0.580366	1.25773	2.75764e-06	Tb427_100104300	FALSE
5638	Tb427-090040300	0	0.00990099	4.3009e-07	0.70151	3.07652	FALSE	10858.9	0.324953	0.707723	1.41511	2.7861e-06	Tb427_090040300	TRUE
7470	Tb427-100144100	4.80256e-05	0.00990099	4.31926e-07	0.966929	3.69975	FALSE	13129.4	0.45784	0.609555	1.32959	2.79612e-06	Tb427_100144100	FALSE
3090	Tb427-050032900	0	0.00990099	4.34478e-07	0.687126	4.37222	FALSE	7816.11	0.189499	0.822251	1.59693	2.81077e-06	Tb427_050032900	FALSE
4404	Tb427-070073700	7.08746e-05	0.00990099	4.39519e-07	0.915498	2.49233	FALSE	16207.3	0.721375	0.437696	1.22307	2.84148e-06	Tb427_070073700	FALSE
1768	Tb427-020030200	0.000111866	0.00990099	4.40604e-07	0.225386	4.24841	FALSE	10981.6	0.329756	0.704974	1.30957	2.84659e-06	Tb427_020030200	TRUE
7285	Tb427-100125100	0.00505398	0.00990099	4.41258e-07	0.245112	2.00164	FALSE	21274	1.58485	0.135733	1.09438	2.84892e-06	Tb427_100125100	FALSE
3805	Tb427-070010700	9.87329e-07	0.00990099	4.42907e-07	0.719886	3.79011	FALSE	9845.06	0.274947	0.748037	1.58347	2.85767e-06	Tb427_070010700	FALSE
5332	Tb427-090007200	3.75688e-07	0.00990099	4.44845e-07	0.70533	4.36447	FALSE	8437.55	0.213349	0.801309	1.5525	2.86826e-06	Tb427_090007200	FALSE
2816	Tb427-040056700	9.57775e-07	0.00990099	4.47381e-07	0.149614	4.57096	FALSE	12036.6	0.389305	0.659555	1.36283	2.88269e-06	Tb427_040056700	FALSE
1900	Tb427-030015300	1.08045e-05	0.00990099	4.48274e-07	0.354013	3.97866	FALSE	13747.8	0.496205	0.589529	1.41459	2.88653e-06	Tb427_030015300	FALSE
2044	Tb427-030031000	0	0.00990099	4.5926e-07	0.362813	3.95365	FALSE	10844.8	0.322989	0.710733	1.36235	2.95531e-06	Tb427_030031000	FALSE
2492	Tb427-040022900	9.20682e-05	0.00990099	4.60284e-07	0.912381	4.45445	FALSE	9766.85	0.271425	0.749738	1.34728	2.95993e-06	Tb427_040022900	FALSE
6178	Tb427-100009400	4.84937e-07	0.00990099	4.66737e-07	0.838485	4.29361	FALSE	8819.48	0.228148	0.791099	1.46266	2.99944e-06	Tb427_100009400	FALSE
7224	Tb427-100118500	7.20415e-07	0.00990099	4.74437e-07	0.363125	3.91714	FALSE	8600.93	0.220302	0.794241	1.47364	3.0469e-06	Tb427_100118500	FALSE
6258	Tb427-100017500	0	0.00990099	4.76853e-07	0.759098	1.00071	FALSE	10598.7	0.309943	0.72199	1.46109	3.06039e-06	Tb427_100017500	FALSE
3895	Tb427-070019900	0	0.00990099	4.78471e-07	0.582936	3.19662	FALSE	7923.88	0.194028	0.817147	1.6422	3.06874e-06	Tb427_070019900	FALSE
6761	Tb427-100069100	0	0.00990099	4.80074e-07	0.940488	4.02649	FALSE	8315.47	0.208766	0.805497	1.76853	3.07698e-06	Tb427_100069100	FALSE
5388	Tb427-090013800	4.88801e-05	0.00990099	4.80592e-07	0.548258	3.73939	FALSE	9206.45	0.245257	0.773822	1.49293	3.07827e-06	Tb427_090013800	FALSE
8783	Tb427-110119600	1.75884e-06	0.00990099	4.84199e-07	0.530154	4.42127	FALSE	10059.4	0.281817	0.749607	1.71944	3.09932e-06	Tb427_110119600	FALSE
2487	Tb427-040022400	9.21055e-06	0.00990099	4.91617e-07	0.604537	3.15275	FALSE	8370.15	0.209945	0.805628	1.50183	3.14473e-06	Tb427_040022400	FALSE
2323	Tb427-040006000	1.75485e-06	0.00990099	5.00468e-07	0.808705	4.54835	FALSE	10600	0.309444	0.723953	1.49042	3.19923e-06	Tb427_040006000	FALSE
7642	Tb427-100162400	9.22098e-07	0.00990099	5.02576e-07	0.469118	4.91246	FALSE	10387.7	0.296606	0.739398	1.65161	3.21059e-06	Tb427_100162400	FALSE
6767	Tb427-100069700	0.0130689	0.00990099	5.06318e-07	0.896051	3.0909	FALSE	20610.3	1.47536	0.141623	1.09128	3.23236e-06	Tb427_100069700	FALSE
4839	Tb427-080040600	3.16595e-06	0.00990099	5.15235e-07	0.106879	3.78324	FALSE	10390.4	0.299546	0.729319	1.43648	3.28712e-06	Tb427_080040600	FALSE
7089	Tb427-100103800	1.49635e-05	0.00990099	5.16451e-07	0.36881	4.41844	FALSE	5601.35	0.115259	0.888743	1.69424	3.29272e-06	Tb427_100103800	FALSE
2035	Tb427-030030100	5.46629e-07	0.00990099	5.18663e-07	0.752449	4.42358	FALSE	8125.79	0.201033	0.812696	1.57535	3.30464e-06	Tb427_030030100	FALSE
1564	Tb427-020009200	0	0.00990099	5.35103e-07	0.529986	4.30559	FALSE	7106.94	0.163904	0.844241	1.62344	3.40715e-06	Tb427_020009200	FALSE
9052	Tb427-110147200	0	0.00990099	5.35587e-07	0.447789	3.45021	FALSE	5633.53	0.116464	0.887827	1.83318	3.40799e-06	Tb427_110147200	FALSE
5210	Tb427-080078500	1.44473e-05	0.00990099	5.4169e-07	0.306528	4.60122	FALSE	7852.66	0.189927	0.824084	1.50639	3.44457e-06	Tb427_080078500	FALSE
3950	Tb427-070026200	0.000180095	0.00990099	5.43277e-07	0.37103	2.64411	FALSE	19807.6	1.23512	0.224738	1.16549	3.45239e-06	Tb427_070026200	FALSE
5236	Tb427-080081100:pseudogene	0.00189273	0.00990099	5.59569e-07	0.536625	4.7787	FALSE	14291.5	0.544018	0.548037	1.25655	3.55359e-06	Tb427_080081100:pseudogene	FALSE
8059	Tb427-110039000	6.88916e-06	0.00990099	5.64592e-07	0.275847	1.00052	FALSE	11903.8	0.380827	0.665707	1.33173	3.5808e-06	Tb427_110039000	FALSE
1277	Tb427-010005700	0.000752766	0.00990099	5.6451e-07	0.301571	4.32254	FALSE	12323.6	0.405721	0.647644	1.29696	3.5808e-06	Tb427_010005700	FALSE
8646	Tb427-110099200	0	0.00990099	5.66191e-07	0.252831	2.83322	FALSE	8102.54	0.201218	0.810079	1.58151	3.58859e-06	Tb427_110099200	FALSE
1438	Tb427-010023300	4.31809e-07	0.00990099	5.71579e-07	0.321539	3.52907	FALSE	11047.6	0.333721	0.70301	1.38198	3.62037e-06	Tb427_010023300	FALSE
4353	Tb427-070068500	1.70503e-07	0.00990099	5.78909e-07	0.900914	3.74139	FALSE	9268.58	0.248718	0.770157	1.50191	3.6644e-06	Tb427_070068500	FALSE
5027	Tb427-080060100	2.1985e-05	0.00990099	5.89352e-07	0.909192	3.937	FALSE	14693.8	0.572398	0.534555	1.22572	3.72807e-06	Tb427_080060100	FALSE
6861	Tb427-100080300	2.26571e-06	0.00990099	5.9049e-07	0.588775	4.62891	FALSE	7092.49	0.162539	0.84856	1.58665	3.73283e-06	Tb427_100080300	FALSE
7090	Tb427-100103900:pseudogene	0	0.00990099	5.97234e-07	0.391434	3.80759	FALSE	6424.8	0.141565	0.863089	1.59725	3.77301e-06	Tb427_100103900:pseudogene	FALSE
7368	Tb427-100133500:pseudogene	1.01224e-05	0.00990099	5.97695e-07	0.879689	3.8045	FALSE	7582.13	0.179734	0.832984	1.58159	3.77346e-06	Tb427_100133500:pseudogene	FALSE
2074	Tb427-030034000	7.12367e-06	0.00990099	6.04892e-07	0.989777	4.66883	FALSE	9464.1	0.256664	0.764398	1.48905	3.81641e-06	Tb427_030034000	FALSE
5372	Tb427-090012200	0.00190851	0.00990099	6.20521e-07	0.304743	3.66609	FALSE	14816.5	0.582863	0.527225	1.22124	3.91247e-06	Tb427_090012200	FALSE
6215	Tb427-100013100	6.56648e-07	0.00990099	6.27515e-07	0.658667	3.71249	FALSE	9908.71	0.275799	0.751702	1.52604	3.954e-06	Tb427_100013100	FALSE
1663	Tb427-020019600	8.82344e-07	0.00990099	6.32856e-07	0.848548	4.70409	FALSE	13156	0.455804	0.617277	1.57675	3.98506e-06	Tb427_020019600	FALSE
2038	Tb427-030030400	5.14828e-07	0.00990099	6.51847e-07	0.487419	1.34902	FALSE	6157.33	0.132695	0.871466	1.82338	4.10198e-06	Tb427_030030400	FALSE
2785	Tb427-040053400	1.53442e-06	0.00990099	6.59553e-07	0.901167	3.69209	FALSE	9819.4	0.273627	0.749215	1.52551	4.14778e-06	Tb427_040053400	FALSE
9409	Tb427-110183400	0	0.00990099	6.79448e-07	0.557198	3.96214	FALSE	5303	0.106897	0.896859	2.29111	4.27012e-06	Tb427_110183400	FALSE
4925	Tb427-080049200	0.000161339	0.00990099	6.84294e-07	0.717059	4.3059	FALSE	15949.1	0.680611	0.472251	1.18846	4.29779e-06	Tb427_080049200	FALSE
9179	Tb427-110160100	3.17853e-05	0.00990099	6.97447e-07	0.375468	3.779	FALSE	15172.5	0.609271	0.515052	1.28721	4.37757e-06	Tb427_110160100	FALSE
6946	Tb427-100088900	1.51271e-05	0.00990099	7.15474e-07	0.743935	3.94685	FALSE	13927	0.510282	0.578403	1.30653	4.48781e-06	Tb427_100088900	FALSE
8662	Tb427-110100800	1.82996e-07	0.00990099	7.2652e-07	0.848824	3.05707	FALSE	9407.52	0.254036	0.767277	1.49313	4.55415e-06	Tb427_110100800	FALSE
1912	Tb427-030016500	0.000471974	0.00990099	7.31626e-07	0.89617	4.34043	FALSE	16486.7	0.740707	0.434293	1.23946	4.58319e-06	Tb427_030016500	FALSE
7288	Tb427-100125400	7.50022e-06	0.00990099	7.38639e-07	0.200756	3.88791	FALSE	8251.61	0.205143	0.810602	1.69485	4.61816e-06	Tb427_100125400	FALSE
6891	Tb427-100083400	0.00115559	0.00990099	7.38534e-07	0.293937	3.96591	FALSE	13255.7	0.466061	0.603403	1.2783	4.61816e-06	Tb427_100083400	FALSE
7146	Tb427-100109500	0.000708286	0.00990099	7.38604e-07	0.554648	2.60367	FALSE	16025.8	0.697667	0.454058	1.20203	4.61816e-06	Tb427_100109500	FALSE
4276	Tb427-070060600	1.84052e-05	0.00990099	7.46444e-07	0.721692	4.88182	FALSE	10247	0.289926	0.744503	1.45784	4.66395e-06	Tb427_070060600	FALSE
5936	Tb427-090071400	0.000580467	0.00990099	7.47878e-07	0.751045	4.12272	FALSE	19226.4	1.1585	0.233246	1.14589	4.6699e-06	Tb427_090071400	FALSE
3735	Tb427-060055300	5.22142e-07	0.00990099	7.58879e-07	0.505622	3.28924	FALSE	8902.29	0.232242	0.785995	1.56527	4.73554e-06	Tb427_060055300	FALSE
1657	Tb427-020019000	-3.81206e-07	0.00990099	7.6242e-07	0.25828	1.84403	FALSE	10660	0.313987	0.717277	1.51559	4.75458e-06	Tb427_020019000	FALSE
1591	Tb427-020012100	2.0973e-06	0.00990099	7.75235e-07	0.433637	1.9868	FALSE	6204.42	0.13363	0.87199	1.70091	4.83138e-06	Tb427_020012100	FALSE
6925	Tb427-100086800	3.36851e-07	0.00990099	7.9342e-07	0.736181	3.64368	FALSE	12557.9	0.422382	0.634031	1.44106	4.94154e-06	Tb427_100086800	FALSE
1487	Tb427-010029000	0	0.00990099	8.12999e-07	0.572852	4.09259	FALSE	11807.6	0.374928	0.671466	1.36104	5.06023e-06	Tb427_010029000	FALSE
1702	Tb427-020023500	4.17657e-07	0.00990099	8.1575e-07	0.77658	3.73545	FALSE	10618.7	0.312466	0.717932	1.52932	5.07409e-06	Tb427_020023500	FALSE
4956	Tb427-080052700	1.53276e-05	0.00990099	8.17479e-07	0.663638	3.9308	FALSE	6461.61	0.141771	0.865183	1.79114	5.08158e-06	Tb427_080052700	FALSE
4660	Tb427-080022400	1.47496e-05	0.00990099	8.21558e-07	0.438339	3.32658	FALSE	9900.93	0.277993	0.743325	1.34498	5.10366e-06	Tb427_080022400	FALSE
3188	Tb427-050042700	0.000114771	0.00990099	8.24034e-07	0.664277	4.70812	FALSE	13896.6	0.50911	0.577487	1.32605	5.11577e-06	Tb427_050042700	FALSE
6502	Tb427-100042800	1.5973e-05	0.00990099	8.32819e-07	0.432909	3.91393	FALSE	10440.4	0.301881	0.728665	1.53228	5.167e-06	Tb427_100042800	FALSE
5685	Tb427-090045300	0.00227877	0.00990099	8.41717e-07	0.814747	1.00038	FALSE	20782.5	1.57089	0.115052	1.10113	5.21886e-06	Tb427_090045300	FALSE
4209	Tb427-070053900	3.37814e-06	0.00990099	8.59558e-07	0.55951	4.41286	FALSE	5230.08	0.104202	0.900916	2.00217	5.32607e-06	Tb427_070053900	FALSE
5329	Tb427-090006900	4.94826e-05	0.00990099	8.69418e-07	0.476619	3.4741	FALSE	10966.7	0.327434	0.710209	1.2722	5.38373e-06	Tb427_090006900	FALSE
8658	Tb427-110100400	3.77937e-06	0.00990099	8.70108e-07	0.254306	4.01797	FALSE	5294.8	0.106299	0.897251	1.67987	5.38456e-06	Tb427_110100400	FALSE
3357	Tb427-060013500	0.00422131	0.00990099	8.72421e-07	0.225584	3.69967	FALSE	19994.9	1.29317	0.19712	1.10478	5.39542e-06	Tb427_060013500	FALSE
6520	Tb427-100044600	0.000709294	0.00990099	8.78997e-07	0.441815	4.35226	FALSE	9635.5	0.264421	0.757199	1.43903	5.43263e-06	Tb427_100044600	FALSE
2391	Tb427-040012800	1.55738e-06	0.00990099	8.83074e-07	0.634846	3.65331	FALSE	7911.49	0.192588	0.820419	1.6011	5.45435e-06	Tb427_040012800	FALSE
7435	Tb427-100140200	6.60439e-05	0.00990099	8.8658e-07	0.126023	4.66211	FALSE	6816.6	0.153069	0.85589	1.63614	5.47252e-06	Tb427_100140200	FALSE
4751	Tb427-080031600	0.000338226	0.00990099	8.99749e-07	0.858045	4.32481	FALSE	15173.1	0.615591	0.504319	1.26668	5.55027e-06	Tb427_080031600	FALSE
2141	Tb427-030042200	0.000127665	0.00990099	9.0498e-07	0.901396	3.77529	FALSE	15265.2	0.61899	0.507853	1.21996	5.57899e-06	Tb427_030042200	TRUE
7531	Tb427-100150600	0	0.00990099	9.29787e-07	0.406094	1.00035	FALSE	7189.52	0.166864	0.84267	1.91337	5.72827e-06	Tb427_100150600	FALSE
820	Tb427-000713200	0	0.00990099	9.40129e-07	0.0734535	1.00069	FALSE	8351.86	0.211472	0.79856	1.59456	5.78831e-06	Tb427_000713200	FALSE
7596	Tb427-100157100	0.00133661	0.00990099	9.57323e-07	0.809648	4.43545	FALSE	17526.2	0.851104	0.382199	1.23908	5.89042e-06	Tb427_100157100	FALSE
5456	Tb427-090021400	0	0.00990099	9.6453e-07	0.042779	4.37892	FALSE	5149.24	0.102469	0.901832	2.63425	5.93101e-06	Tb427_090021400	FALSE
5871	Tb427-090064300	4.77507e-06	0.00990099	9.83315e-07	0.758248	3.88914	FALSE	11380.9	0.351333	0.689005	1.50188	6.04268e-06	Tb427_090064300	FALSE
768	Tb427-000700700:pseudogene	1.63174e-06	0.00990099	9.85145e-07	0.405339	3.85536	FALSE	1635.69	0.0226979	0.977487	3.81018	6.05009e-06	Tb427_000700700:pseudogene	FALSE
7440	Tb427-100140700	0.0084576	0.00990099	9.97029e-07	0.421083	3.19562	FALSE	20513.9	1.41272	0.168194	1.13507	6.1192e-06	Tb427_100140700	FALSE
6649	Tb427-100057600	6.32717e-05	0.00990099	1.00288e-06	0.988633	3.07182	FALSE	11279.8	0.345473	0.692801	1.34653	6.15123e-06	Tb427_100057600	FALSE
1382	Tb427-010016300	5.21684e-06	0.00990099	1.01166e-06	0.477504	4.19139	FALSE	15517.7	0.636776	0.502356	1.32041	6.20111e-06	Tb427_010016300	FALSE
8392	Tb427-110072700	2.33789e-06	0.00990099	1.04799e-06	0.576187	1.00025	FALSE	8501.99	0.214401	0.80445	1.53377	6.41978e-06	Tb427_110072700	FALSE
8294	Tb427-110062900	2.80305e-05	0.00990099	1.05321e-06	0.530658	4.46523	FALSE	10336.1	0.298446	0.728272	1.48404	6.44768e-06	Tb427_110062900	FALSE
3365	Tb427-060014500	4.94503e-06	0.00990099	1.05533e-06	0.209519	1.00023	FALSE	17121.4	0.812676	0.39699	1.22142	6.45659e-06	Tb427_060014500	FALSE
109	Tb427-000107600:pseudogene	3.00476e-06	0.00990099	1.05783e-06	0.655688	3.97853	FALSE	4818.82	0.0930583	0.91034	1.95118	6.46776e-06	Tb427_000107600:pseudogene	FALSE
2921	Tb427-050015100	3.76829e-07	0.00990099	1.09715e-06	0.844211	4.45807	FALSE	5397.46	0.108911	0.89712	2.03602	6.70395e-06	Tb427_050015100	FALSE
7802	Tb427-110013000	8.43366e-05	0.00990099	1.10372e-06	0.173937	4.55558	FALSE	13199.7	0.463062	0.605105	1.32162	6.73984e-06	Tb427_110013000	FALSE
5213	Tb427-080078800	1.23076e-05	0.00990099	1.10748e-06	0.594075	3.99376	FALSE	11473.5	0.355705	0.686257	1.30476	6.75856e-06	Tb427_080078800	FALSE
2835	Tb427-050006300	8.20134e-06	0.00990099	1.12085e-06	0.671486	4.41261	FALSE	8386.04	0.210768	0.804581	1.77187	6.83585e-06	Tb427_050006300	FALSE
3568	Tb427-060037500	4.41726e-06	0.00990099	1.14265e-06	0.20075	4.67684	FALSE	7852.07	0.189465	0.825393	1.66127	6.96441e-06	Tb427_060037500	TRUE
6010	Tb427-090080300	9.37875e-07	0.00990099	1.15886e-06	0.899718	3.88938	FALSE	9385.62	0.253437	0.766754	1.41594	7.05876e-06	Tb427_090080300	FALSE
8766	Tb427-110111400	1.85556e-06	0.00990099	1.18211e-06	0.623085	4.35433	FALSE	8028.35	0.197728	0.814005	1.57165	7.19587e-06	Tb427_110111400	FALSE
4452	Tb427-070079300	1.9979e-05	0.00990099	1.19173e-06	0.386112	4.61272	FALSE	12599.1	0.419859	0.640707	1.41117	7.24988e-06	Tb427_070079300	FALSE
5063	Tb427-080063700	1.41998e-06	0.00990099	1.20326e-06	0.47909	3.59988	FALSE	10089	0.28301	0.74856	1.4759	7.3154e-06	Tb427_080063700	FALSE
8520	Tb427-110085500	0	0.00990099	1.21381e-06	0.137208	4.31885	FALSE	5073.91	0.100379	0.902749	2.06262	7.37496e-06	Tb427_110085500	FALSE
288	Tb427-000278000:pseudogene	2.44739e-08	0.00990099	1.22353e-06	0.769465	3.30893	FALSE	6394.36	0.139773	0.867539	1.76265	7.42935e-06	Tb427_000278000:pseudogene	FALSE
7591	Tb427-100156600	0	0.00990099	1.25067e-06	0.54161	1.00041	FALSE	12269.6	0.405933	0.642147	1.38808	7.5894e-06	Tb427_100156600	FALSE
5749	Tb427-090051700	1.003e-05	0.00990099	1.25536e-06	0.301708	3.91203	FALSE	8299.99	0.207826	0.805759	1.63502	7.61306e-06	Tb427_090051700	FALSE
7523	Tb427-100149800	1.18652e-05	0.00990099	1.26316e-06	0.556225	1.00206	FALSE	15374.2	0.627797	0.502487	1.24192	7.65556e-06	Tb427_100149800	FALSE
2690	Tb427-040043300	0	0.00990099	1.27937e-06	0.920414	1.0005	FALSE	9658.41	0.265551	0.758115	1.59378	7.74898e-06	Tb427_040043300	FALSE
8644	Tb427-110099000	3.83468e-06	0.00990099	1.28571e-06	0.074535	4.39471	FALSE	12850.3	0.440222	0.621728	1.38299	7.78254e-06	Tb427_110099000	FALSE
5182	Tb427-080075700	8.18126e-05	0.00990099	1.3063e-06	0.379213	3.56588	FALSE	12184.9	0.396791	0.655236	1.35994	7.90219e-06	Tb427_080075700	FALSE
2862	Tb427-050009100	0.000685608	0.00990099	1.30863e-06	0.930755	4.19308	FALSE	14690.4	0.574082	0.531021	1.21041	7.91138e-06	Tb427_050009100	FALSE
6376	Tb427-100029700	6.37822e-06	0.00990099	1.31399e-06	0.967352	3.60824	FALSE	6395.56	0.139522	0.86767	1.75635	7.93881e-06	Tb427_100029700	FALSE
9346	Tb427-110176800:pseudogene	3.08663e-05	0.00990099	1.3267e-06	0.101307	4.24462	FALSE	8022.03	0.196849	0.815576	1.55273	8.01063e-06	Tb427_110176800:pseudogene	FALSE
3516	Tb427-060032300	0	0.00990099	1.33397e-06	0.25775	3.09058	FALSE	7302.28	0.171295	0.837958	1.8214	8.0495e-06	Tb427_060032300	FALSE
9455	Tb427-110188000	0.00141222	0.00990099	1.3733e-06	0.244999	3.31885	FALSE	16388.6	0.730914	0.439398	1.19681	8.28166e-06	Tb427_110188000	FALSE
5790	Tb427-090055800	1.8843e-05	0.00990099	1.38995e-06	0.0319308	4.25125	FALSE	11798.7	0.376391	0.666885	1.35928	8.37685e-06	Tb427_090055800	FALSE
6700	Tb427-100062800	0.000103388	0.00990099	1.39759e-06	0.719936	3.08066	FALSE	9095.97	0.239658	0.780366	1.43466	8.41768e-06	Tb427_100062800	FALSE
2276	Tb427-030056600	5.91933e-07	0.00990099	1.46983e-06	0.549046	3.99987	FALSE	9550.09	0.260593	0.76034	1.47191	8.84726e-06	Tb427_030056600	FALSE
4085	Tb427-070041500	0.000112114	0.00990099	1.47212e-06	0.802766	3.67437	FALSE	14514.6	0.560496	0.538482	1.29209	8.85558e-06	Tb427_070041500	FALSE
7953	Tb427-110028300	0	0.00990099	1.48661e-06	0.858077	3.10675	FALSE	8499.93	0.215161	0.801963	1.63516	8.9372e-06	Tb427_110028300	FALSE
8451	Tb427-110078600	8.50942e-05	0.00990099	1.49604e-06	0.14865	4.45675	FALSE	14388.3	0.551053	0.545681	1.24129	8.98831e-06	Tb427_110078600	FALSE
6210	Tb427-100012600	5.53017e-06	0.00990099	1.49762e-06	0.0819076	4.6531	FALSE	5958.11	0.12502	0.884817	2.04378	8.99219e-06	Tb427_100012600	FALSE
8395	Tb427-110073000	1.93166e-06	0.00990099	1.50341e-06	0.788069	4.6173	FALSE	12482.7	0.415196	0.641885	1.41864	9.0214e-06	Tb427_110073000	FALSE
1433	Tb427-010022800	3.49009e-05	0.00990099	1.51962e-06	0.0563294	3.81553	FALSE	11624.9	0.362405	0.684555	1.42826	9.11304e-06	Tb427_010022800	FALSE
6772	Tb427-100070200	4.97791e-05	0.00990099	1.53531e-06	0.356759	3.67325	FALSE	3928.44	0.0702014	0.931021	2.23797	9.19856e-06	Tb427_100070200	FALSE
2348	Tb427-040008500	8.09281e-06	0.00990099	1.53578e-06	0.658702	2.83684	FALSE	7843.65	0.190132	0.821597	1.44204	9.19856e-06	Tb427_040008500	FALSE
6413	Tb427-100033600	0.000279571	0.00990099	1.54471e-06	0.473785	4.27701	FALSE	18048.6	0.91069	0.360733	1.19774	9.24633e-06	Tb427_100033600	FALSE
3321	Tb427-060009700	6.9634e-05	0.00990099	1.55361e-06	0.410463	4.19409	FALSE	16650.9	0.747095	0.439791	1.23486	9.29385e-06	Tb427_060009700	FALSE
2976	Tb427-050020900	3.93315e-05	0.00990099	1.56279e-06	0.644116	3.55183	FALSE	12915.4	0.442436	0.621466	1.27915	9.33838e-06	Tb427_050020900	FALSE
7042	Tb427-100099100	0.00155311	0.00990099	1.56298e-06	0.318804	4.39252	FALSE	18299.5	0.97755	0.314398	1.23516	9.33838e-06	Tb427_100099100	FALSE
3683	Tb427-060049500	0.00685419	0.00990099	1.57006e-06	0.874321	2.01687	FALSE	20161.4	1.36112	0.173822	1.09612	9.37487e-06	Tb427_060049500	FALSE
5769	Tb427-090053700	0.000835038	0.00990099	1.58612e-06	0.23515	1.13768	FALSE	19748.1	1.24504	0.21322	1.13067	9.46496e-06	Tb427_090053700	FALSE
3136	Tb427-050037500	5.42198e-06	0.00990099	1.59043e-06	0.132822	4.81604	FALSE	11928.1	0.379186	0.672251	1.40023	9.48481e-06	Tb427_050037500	FALSE
4061	Tb427-070039100	2.94686e-06	0.00990099	1.59249e-06	0.384368	3.3552	FALSE	8503.63	0.215427	0.800785	1.56223	9.49129e-06	Tb427_070039100	FALSE
5599	Tb427-090036200	4.1359e-05	0.00990099	1.60418e-06	0.297328	3.09148	FALSE	13625.7	0.488892	0.592408	1.28975	9.55509e-06	Tb427_090036200	FALSE
5889	Tb427-090066100	0.00133903	0.00990099	1.61494e-06	0.655734	1.00099	FALSE	21193.6	1.65909	0.104058	1.10528	9.61325e-06	Tb427_090066100	FALSE
6692	Tb427-100062000	0	0.00990099	1.62894e-06	0.988064	1.0005	FALSE	8345.87	0.210169	0.803272	1.63439	9.69065e-06	Tb427_100062000	FALSE
4770	Tb427-080033500	6.94569e-07	0.00990099	1.63153e-06	0.760467	3.9907	FALSE	10960.3	0.328498	0.707853	1.54168	9.70008e-06	Tb427_080033500	FALSE
4210	Tb427-070054000	1.34757e-06	0.00990099	1.63357e-06	0.43787	4.38534	FALSE	8922.45	0.234043	0.782199	1.67751	9.70626e-06	Tb427_070054000	FALSE
2501	Tb427-040023800	2.78353e-05	0.00990099	1.64151e-06	0.847648	3.62684	FALSE	10615.9	0.310345	0.722382	1.41489	9.7475e-06	Tb427_040023800	FALSE
8406	Tb427-110074100	0	0.00990099	1.65067e-06	0.560404	1.00011	FALSE	7684.96	0.184945	0.825	1.66611	9.79587e-06	Tb427_110074100	FALSE
7346	Tb427-100131200	6.17444e-07	0.00990099	1.67857e-06	0.282748	4.00738	FALSE	10009.5	0.280587	0.747382	1.41404	9.95535e-06	Tb427_100131200	FALSE
7604	Tb427-100157900	9.32083e-06	0.00990099	1.6962e-06	0.602479	4.59879	FALSE	12187.8	0.398588	0.651702	1.31303	1.00538e-05	Tb427_100157900	FALSE
5844	Tb427-090061600	0.285424	0.00990099	1.70794e-06	0.27356	2.35981	FALSE	24981.6	3.64433	0.00222513	1.03657	1.01172e-05	Tb427_090061600	FALSE
8778	Tb427-110119100	5.03107e-07	0.00990099	1.71136e-06	0.601351	3.28106	FALSE	6482.08	0.143169	0.861649	1.63027	1.01312e-05	Tb427_110119100	FALSE
3813	Tb427-070011500	0	0.00990099	1.73613e-06	0.497743	4.45056	FALSE	4524.95	0.0853762	0.918325	2.4089	1.02715e-05	Tb427_070011500	FALSE
5245	Tb427-080082000	6.87891e-05	0.00990099	1.77972e-06	0.120265	4.85033	FALSE	13270.6	0.468426	0.600916	1.39163	1.05205e-05	Tb427_080082000	FALSE
1635	Tb427-020016800	0.000229371	0.00990099	1.78038e-06	0.867967	4.47187	FALSE	14456.5	0.54471	0.563089	1.20311	1.05205e-05	Tb427_020016800	FALSE
6949	Tb427-100089200	0.00041882	0.00990099	1.80985e-06	0.791318	3.36977	FALSE	16552.9	0.751733	0.424738	1.21779	1.06881e-05	Tb427_100089200	FALSE
7603	Tb427-100157800	8.51475e-06	0.00990099	1.82573e-06	0.332085	3.78139	FALSE	14229.2	0.530537	0.567539	1.35677	1.07754e-05	Tb427_100157800	FALSE
8790	Tb427-110120300	1.01192e-06	0.00990099	1.84232e-06	0.616799	4.1202	FALSE	5532.59	0.113122	0.891623	1.65631	1.08667e-05	Tb427_110120300	FALSE
3467	Tb427-060025800	2.01876e-05	0.00990099	1.87672e-06	0.455766	3.81708	FALSE	10622.5	0.313032	0.715183	1.32848	1.10628e-05	Tb427_060025800	FALSE
4106	Tb427-070043600	1.64597e-06	0.00990099	1.88556e-06	0.477812	1.00799	FALSE	8370.33	0.211768	0.798953	1.4939	1.11082e-05	Tb427_070043600	FALSE
5772	Tb427-090054000	1.20062e-06	0.00990099	1.89444e-06	0.937551	3.81646	FALSE	8730.47	0.2256	0.790314	1.53871	1.11537e-05	Tb427_090054000	FALSE
4853	Tb427-080042000:pseudogene	9.2905e-07	0.00990099	1.90616e-06	0.125427	3.93804	FALSE	8933.19	0.233943	0.782853	1.55943	1.12159e-05	Tb427_080042000:pseudogene	FALSE
7541	Tb427-100151600	9.11092e-06	0.00990099	1.91148e-06	0.150161	4.68521	FALSE	13654.3	0.495299	0.583639	1.32125	1.12404e-05	Tb427_100151600	FALSE
9325	Tb427-110174700	0	0.00990099	1.93511e-06	0.400864	4.57138	FALSE	6206.02	0.133524	0.874607	1.82069	1.13725e-05	Tb427_110174700	FALSE
6191	Tb427-100010700	1.15767e-05	0.00990099	1.9445e-06	0.827591	4.4952	FALSE	10638.2	0.312036	0.720026	1.40305	1.14207e-05	Tb427_100010700	FALSE
3258	Tb427-050051300	1.2097e-05	0.00990099	1.98089e-06	0.782634	4.35976	FALSE	12174.9	0.397065	0.653796	1.29692	1.16274e-05	Tb427_050051300	TRUE
2506	Tb427-040024300	7.4925e-06	0.00990099	2.09085e-06	0.224687	2.61571	FALSE	7246.75	0.16883	0.838874	1.52772	1.22654e-05	Tb427_040024300	FALSE
7530	Tb427-100150500	2.36372e-07	0.00990099	2.15445e-06	0.644153	1.92461	FALSE	6038.29	0.128929	0.874738	1.77952	1.26309e-05	Tb427_100150500	FALSE
3166	Tb427-050040500	1.04586e-05	0.00990099	2.18814e-06	0.808198	3.52254	FALSE	14698.5	0.575933	0.528796	1.2658	1.28206e-05	Tb427_050040500	FALSE
8390	Tb427-110072500	6.06593e-05	0.00990099	2.19403e-06	0.444363	4.09486	FALSE	10610.2	0.309244	0.724084	1.39638	1.28473e-05	Tb427_110072500	FALSE
4551	Tb427-080009100	0.0215944	0.00990099	2.24001e-06	0.304629	2.59472	FALSE	21029.1	1.53084	0.145026	1.10338	1.31087e-05	Tb427_080009100	FALSE
2978	Tb427-050021100	2.27581e-06	0.00990099	2.25143e-06	0.115375	4.38464	FALSE	9636.17	0.265598	0.754712	1.69696	1.31675e-05	Tb427_050021100	FALSE
3525	Tb427-060033200	1.36272e-05	0.00990099	2.27971e-06	0.96117	3.69085	FALSE	7487.98	0.176785	0.834424	1.5224	1.33168e-05	Tb427_060033200	FALSE
1365	Tb427-010014500	8.11272e-05	0.00990099	2.27885e-06	0.115687	3.31812	FALSE	13410.6	0.466513	0.617801	1.30624	1.33168e-05	Tb427_010014500	FALSE
6179	Tb427-100009500	1.04974e-06	0.00990099	2.2885e-06	0.364168	4.27211	FALSE	8155.65	0.201219	0.81466	1.61505	1.33601e-05	Tb427_100009500	FALSE
2494	Tb427-040023100	0.00217487	0.00990099	2.34553e-06	0.1803	3.17831	FALSE	17028.3	0.786062	0.421728	1.16404	1.36849e-05	Tb427_040023100	FALSE
8093	Tb427-110042600	0.000159486	0.00990099	2.36117e-06	0.216736	3.26747	FALSE	13100.3	0.453091	0.616623	1.3004	1.37678e-05	Tb427_110042600	FALSE
2680	Tb427-040042300	1.97426e-05	0.00990099	2.3643e-06	0.903184	3.36082	FALSE	7707.18	0.185088	0.825393	1.58919	1.37778e-05	Tb427_040042300	FALSE
5272	Tb427-080085200	1.57314e-06	0.00990099	2.39594e-06	0.546241	3.61618	FALSE	11353.1	0.347198	0.696728	1.33831	1.39538e-05	Tb427_080085200	TRUE
9159	Tb427-110158100	1.17306e-06	0.00990099	2.45519e-06	0.844722	1.08331	FALSE	6891.65	0.156326	0.850916	1.62862	1.42902e-05	Tb427_110158100	FALSE
3442	Tb427-060023300	1.81174e-06	0.00990099	2.4679e-06	0.468196	3.94263	FALSE	11658.6	0.367395	0.675916	1.39712	1.43556e-05	Tb427_060023300	FALSE
1563	Tb427-020009100	3.0334e-05	0.00990099	2.47921e-06	0.346796	4.31496	FALSE	9642.32	0.263176	0.762565	1.37976	1.44127e-05	Tb427_020009100	FALSE
1769	Tb427-020030300	7.23828e-08	0.00990099	2.54699e-06	0.795772	3.31095	FALSE	10759.6	0.317566	0.717147	1.47418	1.47979e-05	Tb427_020030300	FALSE
4736	Tb427-080030100	3.7588e-05	0.00990099	2.56881e-06	0.992642	4.26381	FALSE	10025.2	0.281577	0.746073	1.45438	1.49157e-05	Tb427_080030100	FALSE
2933	Tb427-050016300	0	0.00990099	2.58291e-06	0.80491	4.71848	FALSE	9664.9	0.265093	0.760079	1.50807	1.49886e-05	Tb427_050016300	FALSE
5177	Tb427-080075200	0.000232356	0.00990099	2.58678e-06	0.971285	4.27476	FALSE	14321.5	0.546342	0.547251	1.23095	1.50021e-05	Tb427_080075200	FALSE
3989	Tb427-070030100	7.55017e-07	0.00990099	2.5953e-06	0.35766	4.12711	FALSE	8879.98	0.229744	0.792408	1.51171	1.50425e-05	Tb427_070030100	FALSE
1603	Tb427-020013300	0.00325964	0.00990099	2.60277e-06	0.269789	4.47824	FALSE	16570.1	0.745285	0.43377	1.22731	1.50768e-05	Tb427_020013300	FALSE
5509	Tb427-090027100	0.271963	0.00990099	2.60438e-06	0.998925	2.48071	FALSE	23861.7	2.93531	0.0091623	1.04227	1.50771e-05	Tb427_090027100	FALSE
6161	Tb427-100007700	6.3782e-05	0.00990099	2.63467e-06	0.325197	3.63172	FALSE	11403.5	0.352103	0.688874	1.42296	1.52433e-05	Tb427_100007700	FALSE
7641	Tb427-100162300	0	0.00990099	2.67037e-06	0.688065	4.69741	FALSE	8347.18	0.209664	0.805628	1.70231	1.54407e-05	Tb427_100162300	FALSE
1864	Tb427-030011700	0.000133016	0.00990099	2.67813e-06	0.0624945	3.67583	FALSE	11918.4	0.382719	0.662696	1.3497	1.54763e-05	Tb427_030011700	FALSE
7036	Tb427-100098500	2.80424e-06	0.00990099	2.69059e-06	0.400092	4.72936	FALSE	8528.07	0.21643	0.801047	1.62676	1.55391e-05	Tb427_100098500	FALSE
5491	Tb427-090025300	7.45958e-05	0.00990099	2.69482e-06	0.835666	4.36044	FALSE	12190.6	0.398206	0.652356	1.38242	1.55542e-05	Tb427_090025300	FALSE
3559	Tb427-060036600	6.88824e-06	0.00990099	2.71016e-06	0.0611305	2.60878	FALSE	12254.6	0.402857	0.648298	1.31547	1.56334e-05	Tb427_060036600	TRUE
1697	Tb427-020023000	1.20309e-06	0.00990099	2.72014e-06	0.987555	4.64285	FALSE	9744.38	0.26861	0.757068	1.45145	1.56816e-05	Tb427_020023000	FALSE
8853	Tb427-110126600	5.91593e-06	0.00990099	2.76817e-06	0.555532	3.68105	FALSE	3551.03	0.0614023	0.939267	2.28183	1.59491e-05	Tb427_110126600	FALSE
4744	Tb427-080030900	1.92209e-05	0.00990099	2.78187e-06	0.926324	4.26329	FALSE	7843.13	0.190406	0.82055	1.57105	1.60185e-05	Tb427_080030900	FALSE
4423	Tb427-070076300	0.00398999	0.00990099	2.82317e-06	0.906518	1.00068	FALSE	21918.6	1.98331	0.0519634	1.08551	1.62467e-05	Tb427_070076300	FALSE
5563	Tb427-090032500	0	0.00990099	2.82736e-06	0.485154	3.87387	FALSE	7981.15	0.195917	0.816361	1.84176	1.62611e-05	Tb427_090032500	FALSE
8472	Tb427-110080700	1.49368e-06	0.00990099	2.83291e-06	0.994053	3.6895	FALSE	14132.9	0.529307	0.561387	1.32792	1.62833e-05	Tb427_110080700	FALSE
9284	Tb427-110170600	7.9449e-06	0.00990099	2.83715e-06	0.59692	3.68169	FALSE	7842.16	0.189618	0.82356	1.66205	1.62981e-05	Tb427_110170600	FALSE
4011	Tb427-070032300	0.000105801	0.00990099	2.84947e-06	0.409056	4.1853	FALSE	15194.5	0.607703	0.51911	1.25491	1.63591e-05	Tb427_070032300	FALSE
2133	Tb427-030041400	6.44971e-07	0.00990099	2.89424e-06	0.947478	3.99571	FALSE	8251.56	0.205866	0.808508	1.86942	1.66063e-05	Tb427_030041400	FALSE
2482	Tb427-040021900	0	0.00990099	2.94252e-06	0.679722	3.96148	FALSE	5287.26	0.106481	0.896859	2.16869	1.68733e-05	Tb427_040021900	FALSE
2320	Tb427-040005700	2.65335e-05	0.00990099	2.95235e-06	0.630628	4.82274	FALSE	12372.9	0.403518	0.657723	1.63104	1.69197e-05	Tb427_040005700	FALSE
4694	Tb427-080025900	1.34092e-06	0.00990099	2.96888e-06	0.56328	4.59122	FALSE	9222.87	0.246278	0.77356	1.59555	1.70044e-05	Tb427_080025900	FALSE
9182	Tb427-110160400	0.0210881	0.00990099	2.97714e-06	0.665878	3.37586	FALSE	21115.4	1.63678	0.11034	1.10859	1.70416e-05	Tb427_110160400	FALSE
9124	Tb427-110154600	3.9544e-07	0.00990099	3.00299e-06	0.120679	4.05577	FALSE	7440.13	0.175189	0.835864	1.66118	1.71693e-05	Tb427_110154600	FALSE
9082	Tb427-110150400	4.47708e-07	0.00990099	3.00207e-06	0.797278	3.38784	FALSE	12802.3	0.432996	0.632461	1.30928	1.71693e-05	Tb427_110150400	FALSE
6510	Tb427-100043600	5.11832e-09	0.00990099	3.05629e-06	0.659784	2.02847	FALSE	12305.7	0.404143	0.650262	1.3689	1.74637e-05	Tb427_100043600	FALSE
6901	Tb427-100084400	1.57444e-06	0.00990099	3.14791e-06	0.148423	4.55221	FALSE	5556.51	0.114063	0.890576	2.14784	1.79766e-05	Tb427_100084400	FALSE
7595	Tb427-100157000	9.69212e-07	0.00990099	3.16655e-06	0.935108	3.83832	FALSE	9069.51	0.239486	0.779974	1.67252	1.80724e-05	Tb427_100157000	FALSE
1639	Tb427-020017200	3.61626e-07	0.00990099	3.1692e-06	0.130742	3.64665	FALSE	6722.18	0.150793	0.85589	1.58761	1.80769e-05	Tb427_020017200	FALSE
5873	Tb427-090064500	0.0156856	0.00990099	3.18747e-06	0.555186	3.07127	FALSE	20448.8	1.47724	0.132853	1.13378	1.81705e-05	Tb427_090064500	FALSE
2069	Tb427-030033500	2.50349e-05	0.00990099	3.2101e-06	0.352873	2.1348	FALSE	7615.44	0.182152	0.826702	1.50127	1.82887e-05	Tb427_030033500	FALSE
7325	Tb427-100129100	0.000472667	0.00990099	3.23362e-06	0.385756	4.45483	FALSE	10891.3	0.3252	0.707461	1.27322	1.84119e-05	Tb427_100129100	FALSE
5634	Tb427-090039900	2.77394e-06	0.00990099	3.25049e-06	0.240747	2.77762	FALSE	14372.1	0.544105	0.556283	1.28571	1.84971e-05	Tb427_090039900	FALSE
8709	Tb427-110105700	0.0052688	0.00990099	3.33959e-06	0.584385	1.00024	FALSE	21192.9	1.60633	0.120942	1.09109	1.89929e-05	Tb427_110105700	FALSE
7805	Tb427-110013300	1.37777e-05	0.00990099	3.34335e-06	0.52849	4.12286	FALSE	7805.88	0.188337	0.825	1.53291	1.90032e-05	Tb427_110013300	FALSE
2028	Tb427-030029400	0.000210448	0.00990099	3.35938e-06	0.490687	3.98694	FALSE	14149.9	0.532287	0.557461	1.25217	1.90831e-05	Tb427_030029400	TRUE
6717	Tb427-100064500	4.39495e-05	0.00990099	3.38309e-06	0.891565	4.03089	FALSE	13495	0.48548	0.587042	1.37689	1.92065e-05	Tb427_100064500	FALSE
1542	Tb427-020006900	0.000122662	0.00990099	3.47942e-06	0.346602	4.54841	FALSE	15118.7	0.598535	0.527356	1.25496	1.97418e-05	Tb427_020006900	FALSE
6437	Tb427-100036300	0.00078076	0.00990099	3.48462e-06	0.710769	4.59084	FALSE	12465.6	0.417455	0.633508	1.27508	1.97598e-05	Tb427_100036300	FALSE
351	Tb427-000348000:pseudogene	1.15375e-06	0.00990099	3.52679e-06	0.569903	4.3181	FALSE	1995.97	0.0290751	0.971335	4.30262	1.99872e-05	Tb427_000348000:pseudogene	FALSE
6083	Tb427-090087700	9.98505e-05	0.00990099	3.53296e-06	0.921722	2.83622	FALSE	7332.53	0.171454	0.837042	1.40637	2.00105e-05	Tb427_090087700	TRUE
7562	Tb427-100153700:pseudogene	0.00274842	0.00990099	3.56624e-06	0.250491	3.2501	FALSE	19128.5	1.10109	0.270288	1.16156	2.01872e-05	Tb427_100153700:pseudogene	FALSE
7694	Tb427-100168800	2.74799e-05	0.00990099	3.63516e-06	0.284562	3.74986	FALSE	14959.6	0.59249	0.524215	1.30893	2.05653e-05	Tb427_100168800	FALSE
4200	Tb427-070053000	3.57068e-05	0.00990099	3.65122e-06	0.7063	4.09273	FALSE	9356.95	0.251445	0.769634	1.31274	2.06441e-05	Tb427_070053000	FALSE
4121	Tb427-070045100	0.0174757	0.00990099	3.70426e-06	0.272327	3.3029	FALSE	21489.4	1.70539	0.104974	1.10613	2.09318e-05	Tb427_070045100	TRUE
3962	Tb427-070027400	8.26138e-06	0.00990099	3.98705e-06	0.954853	3.41875	FALSE	4777.85	0.0920746	0.909686	1.62962	2.25166e-05	Tb427_070027400	FALSE
6108	Tb427-090090200	5.06049e-06	0.00990099	4.05847e-06	0.890716	3.79345	FALSE	7075.85	0.161933	0.848953	1.49104	2.29066e-05	Tb427_090090200	FALSE
1412	Tb427-010020600	3.6154e-05	0.00990099	4.06327e-06	0.163738	3.68175	FALSE	7596.14	0.180746	0.830366	1.65263	2.29204e-05	Tb427_010020600	FALSE
6900	Tb427-100084300	1.88708e-07	0.00990099	4.08859e-06	0.631218	3.98517	FALSE	8824.71	0.228189	0.792016	1.77585	2.30498e-05	Tb427_100084300	FALSE
5330	Tb427-090007000	1.46342e-05	0.00990099	4.10494e-06	0.331648	4.56873	FALSE	14431.8	0.547554	0.555366	1.315	2.31285e-05	Tb427_090007000	FALSE
8607	Tb427-110094300	7.05191e-05	0.00990099	4.23376e-06	0.520484	4.7566	FALSE	7209.33	0.166679	0.843063	1.72636	2.38404e-05	Tb427_110094300	FALSE
1656	Tb427-020018900	3.66889e-05	0.00990099	4.24743e-06	0.90985	2.0498	FALSE	13516.3	0.483776	0.592016	1.2658	2.39035e-05	Tb427_020018900	FALSE
3655	Tb427-060046200	0.000193762	0.00990099	4.25786e-06	0.282993	4.14266	FALSE	15069.3	0.604358	0.513351	1.29575	2.39483e-05	Tb427_060046200	FALSE
1879	Tb427-030013200	6.10951e-06	0.00990099	4.33705e-06	0.638807	4.81701	FALSE	11323.5	0.346062	0.69699	1.50601	2.43795e-05	Tb427_030013200	FALSE
7307	Tb427-100127300	0	0.00990099	4.34674e-06	0.127631	2.04079	FALSE	4544.31	0.085835	0.916492	2.06477	2.44198e-05	Tb427_100127300	TRUE
3408	Tb427-060018800	0.000118753	0.00990099	4.3997e-06	0.0993853	4.8793	FALSE	7217.31	0.166491	0.845419	1.74625	2.47003e-05	Tb427_060018800	FALSE
7312	Tb427-100127800	0.000203984	0.00990099	4.40176e-06	0.274158	2.27148	FALSE	15439.7	0.630071	0.504974	1.20628	2.47003e-05	Tb427_100127800	FALSE
4343	Tb427-070067500	9.13257e-05	0.00990099	4.47055e-06	0.038043	4.725	FALSE	13511.5	0.476971	0.606545	1.321	2.50718e-05	Tb427_070067500	FALSE
4417	Tb427-070075200	1.8414e-06	0.00990099	4.65755e-06	0.0116856	3.42627	FALSE	10127.4	0.287775	0.738613	1.45232	2.61054e-05	Tb427_070075200	FALSE
5333	Tb427-090007300	9.08084e-06	0.00990099	4.67478e-06	0.70411	3.95103	FALSE	13899.5	0.507081	0.582068	1.31033	2.61868e-05	Tb427_090007300	FALSE
4295	Tb427-070062500	6.06585e-06	0.00990099	4.77081e-06	0.214505	4.73191	FALSE	9475.17	0.254952	0.770942	1.60118	2.67094e-05	Tb427_070062500	FALSE
7622	Tb427-100160400	9.49002e-05	0.00990099	4.82698e-06	0.661669	4.73351	FALSE	15853.5	0.669889	0.480497	1.2847	2.70082e-05	Tb427_100160400	FALSE
8007	Tb427-110033700:pseudogene	0.000751747	0.00990099	4.87134e-06	0.300489	4.15115	FALSE	2896.58	0.0466809	0.953141	1.87274	2.72407e-05	Tb427_110033700:pseudogene	FALSE
8749	Tb427-110109700	9.79476e-06	0.00990099	4.94349e-06	0.533303	3.62035	FALSE	8421.71	0.212578	0.801832	1.37658	2.76282e-05	Tb427_110109700	FALSE
9472	Tb427-110189700	4.73025e-06	0.00990099	4.96102e-06	0.150798	3.632	FALSE	9306.21	0.249752	0.770288	1.56113	2.77102e-05	Tb427_110189700	FALSE
5536	Tb427-090029800	0.00228143	0.00990099	4.9745e-06	0.184393	4.50878	FALSE	18185.4	0.955474	0.327618	1.16986	2.77695e-05	Tb427_090029800	FALSE
2008	Tb427-030027400	5.82563e-06	0.00990099	5.03972e-06	0.667863	4.56245	FALSE	7003.5	0.15988	0.849476	2.12154	2.81174e-05	Tb427_030027400	FALSE
924	Tb427-000749100:pseudogene	1.7453e-05	0.00990099	5.07493e-06	0.921516	3.34228	FALSE	1785.34	0.0252991	0.976309	5.29059	2.82975e-05	Tb427_000749100:pseudogene	FALSE
6907	Tb427-100085000	3.71107e-06	0.00990099	5.08517e-06	0.669049	3.48777	FALSE	7654.78	0.182442	0.830628	1.68316	2.83384e-05	Tb427_100085000	FALSE
5527	Tb427-090028900	1.39106e-06	0.00990099	5.08968e-06	0.582277	4.5383	FALSE	11778.3	0.375159	0.668717	1.37623	2.83472e-05	Tb427_090028900	FALSE
8515	Tb427-110085000	9.92952e-05	0.00990099	5.15253e-06	0.903528	4.04405	FALSE	12234.3	0.400855	0.650262	1.36247	2.86807e-05	Tb427_110085000	FALSE
1410	Tb427-010020400	1.22822e-05	0.00990099	5.18232e-06	0.100623	3.12352	FALSE	7850.78	0.190309	0.821335	1.53982	2.883e-05	Tb427_010020400	FALSE
8536	Tb427-110087100	2.555e-06	0.00990099	5.22015e-06	0.554998	3.17068	FALSE	9926.07	0.278306	0.745681	1.47078	2.90238e-05	Tb427_110087100	FALSE
2548	Tb427-040028500	0	0.00990099	5.23033e-06	0.795765	3.55184	FALSE	3981.84	0.0723006	0.92644	2.20082	2.90637e-05	Tb427_040028500	TRUE
7532	Tb427-100150700	1.90128e-06	0.00990099	5.25538e-06	0.692833	1.00005	FALSE	10984.2	0.330017	0.705105	1.38028	2.91862e-05	Tb427_100150700	FALSE
3371	Tb427-060015100:pseudogene	9.03726e-05	0.00990099	5.31422e-06	0.451339	3.64121	FALSE	8401.82	0.211095	0.804712	1.51687	2.9496e-05	Tb427_060015100:pseudogene	FALSE
1457	Tb427-010025200	7.06963e-07	0.00990099	5.39417e-06	0.850206	3.15348	FALSE	8011.75	0.196902	0.815183	1.61942	2.99227e-05	Tb427_010025200	FALSE
1604	Tb427-020013400	0.0400674	0.00990099	5.4495e-06	0.409389	4.40278	FALSE	18003.2	0.922793	0.344503	1.22759	3.02123e-05	Tb427_020013400	FALSE
3239	Tb427-050047800	3.38706e-05	0.00990099	5.51334e-06	0.499566	4.69673	FALSE	7905.36	0.192271	0.820288	1.64944	3.05488e-05	Tb427_050047800	FALSE
891	Tb427-000740800	4.27074e-05	0.00990099	5.56655e-06	0.658473	3.38725	FALSE	11261.8	0.344161	0.695026	1.36442	3.0826e-05	Tb427_000740800	FALSE
8825	Tb427-110123800	6.7535e-05	0.00990099	5.64154e-06	0.947022	4.77287	FALSE	9929.17	0.27722	0.74856	1.50004	3.12234e-05	Tb427_110123800	FALSE
3030	Tb427-050026500:pseudogene	5.70886e-05	0.00990099	5.71327e-06	0.635562	4.11886	FALSE	13426.1	0.476233	0.599476	1.3691	3.16023e-05	Tb427_050026500:pseudogene	FALSE
6847	Tb427-100078900	0.000366376	0.00990099	5.77521e-06	0.795541	4.82085	FALSE	14627	0.563006	0.544895	1.3843	3.19267e-05	Tb427_100078900	FALSE
5868	Tb427-090064000	7.30084e-06	0.00990099	5.9009e-06	0.923408	1.00025	FALSE	9625.21	0.264892	0.754319	1.40658	3.25844e-05	Tb427_090064000	FALSE
4035	Tb427-070036500	1.15353e-05	0.00990099	5.89953e-06	0.784309	4.38801	FALSE	12643.3	0.420011	0.646466	1.36599	3.25844e-05	Tb427_070036500	FALSE
7803	Tb427-110013100	2.94313e-05	0.00990099	5.92996e-06	0.743586	4.26609	FALSE	9043.55	0.238913	0.777618	1.35576	3.27262e-05	Tb427_110013100	FALSE
9033	Tb427-110145300	0.0013335	0.00990099	5.93945e-06	0.352483	4.79152	FALSE	16334.3	0.730507	0.434686	1.24532	3.27599e-05	Tb427_110145300	FALSE
8602	Tb427-110093800	9.09962e-05	0.00990099	6.0229e-06	0.847219	3.56416	FALSE	7904.43	0.191494	0.822513	1.36145	3.32013e-05	Tb427_110093800	FALSE
2551	Tb427-040028800	3.46727e-07	0.00990099	6.0547e-06	0.519194	4.82775	FALSE	9448.04	0.254952	0.76911	1.63101	3.33577e-05	Tb427_040028800	FALSE
4633	Tb427-080019700	7.34313e-06	0.00990099	6.19848e-06	0.873473	4.34524	FALSE	7986.85	0.195146	0.818717	1.60589	3.41304e-05	Tb427_080019700	FALSE
6255	Tb427-100017200:pseudogene	0.00109115	0.00990099	6.24722e-06	0.0218811	3.73039	FALSE	13362.4	0.468611	0.608508	1.2749	3.43792e-05	Tb427_100017200:pseudogene	FALSE
8653	Tb427-110099900	1.15948e-06	0.00990099	6.26504e-06	0.71302	1.00021	FALSE	14209.9	0.536589	0.555236	1.30757	3.44577e-05	Tb427_110099900	FALSE
3210	Tb427-050044900	0.000105934	0.00990099	6.37495e-06	0.85568	4.76826	FALSE	12696.4	0.427812	0.633246	1.36299	3.50423e-05	Tb427_050044900	FALSE
7834	Tb427-110016200	2.73062e-05	0.00990099	6.38165e-06	0.917489	4.41612	FALSE	7664.24	0.183308	0.82788	1.58264	3.50593e-05	Tb427_110016200	FALSE
1372	Tb427-010015200	0.000355343	0.00990099	6.39187e-06	0.136728	4.26298	FALSE	11838.6	0.375789	0.671859	1.44909	3.50956e-05	Tb427_010015200	FALSE
3833	Tb427-070013600	-3.44948e-07	0.00990099	6.44397e-06	0.839759	3.05695	FALSE	4936.55	0.0968692	0.904319	1.77577	3.53616e-05	Tb427_070013600	FALSE
3575	Tb427-060038200	1.04574e-05	0.00990099	6.46613e-06	0.198542	3.24154	FALSE	7939.22	0.1943	0.816492	1.56704	3.54631e-05	Tb427_060038200	FALSE
6799	Tb427-100072900	2.45756e-05	0.00990099	6.55503e-06	0.780403	3.29898	FALSE	13858.6	0.505007	0.581545	1.28172	3.59303e-05	Tb427_100072900	FALSE
8968	Tb427-110138500	3.7497e-05	0.00990099	6.56431e-06	0.245032	4.66081	FALSE	6589.26	0.145658	0.86178	1.62083	3.59609e-05	Tb427_110138500	FALSE
1292	Tb427-010007200	9.26593e-07	0.00990099	6.57374e-06	0.519791	4.45317	FALSE	7124.43	0.164144	0.844764	1.63274	3.59922e-05	Tb427_010007200	FALSE
3164	Tb427-050040300	9.84372e-05	0.00990099	6.69154e-06	0.671398	3.85628	FALSE	9909.66	0.276422	0.74856	1.2966	3.66164e-05	Tb427_050040300	FALSE
9203	Tb427-110162500	0.000260186	0.00990099	6.70887e-06	0.901549	4.31808	FALSE	9686.03	0.266191	0.75733	1.35635	3.66906e-05	Tb427_110162500	FALSE
4093	Tb427-070042300	1.96704e-05	0.00990099	6.77845e-06	0.721167	4.39238	FALSE	8990.09	0.235762	0.782723	1.60544	3.70502e-05	Tb427_070042300	FALSE
5546	Tb427-090030800	2.53437e-05	0.00990099	6.84806e-06	0.477923	2.57418	FALSE	11611.1	0.364237	0.677749	1.35123	3.74095e-05	Tb427_090030800	FALSE
9488	COI	0.0765207	0.00990099	6.91414e-06	0.61102	1.00078	FALSE	23300.8	2.74169	0.00772251	1.04372	3.77493e-05	COI	FALSE
8508	Tb427-110084300	1.62515e-06	0.00990099	6.96727e-06	0.668904	3.53588	FALSE	6944.2	0.157316	0.852749	1.68073	3.80179e-05	Tb427_110084300	FALSE
4635	Tb427-080019900	0.00037178	0.00990099	7.07043e-06	0.953873	3.89126	FALSE	9738.64	0.268737	0.75445	1.39517	3.85591e-05	Tb427_080019900	FALSE
6381	Tb427-100030200	0.00057835	0.00990099	7.08656e-06	0.48652	3.6407	FALSE	16710.2	0.769344	0.414529	1.23551	3.86253e-05	Tb427_100030200	FALSE
7915	Tb427-110024400	2.93843e-07	0.00990099	7.1497e-06	0.243655	3.41843	FALSE	7926.37	0.194115	0.816754	1.68234	3.89476e-05	Tb427_110024400	FALSE
7600	Tb427-100157500	0.000248669	0.00990099	7.20593e-06	0.716946	4.03612	FALSE	14999.3	0.59221	0.52788	1.2964	3.92319e-05	Tb427_100157500	FALSE
1847	Tb427-030010000	0.000683112	0.00990099	7.46056e-06	0.898359	3.23747	FALSE	9102.73	0.239888	0.779974	1.31641	4.05953e-05	Tb427_030010000	FALSE
8689	Tb427-110103500	0.000158445	0.00990099	7.66097e-06	0.630688	4.76008	FALSE	11266.6	0.344653	0.694372	1.3965	4.16624e-05	Tb427_110103500	FALSE
8381	Tb427-110071600	0.000672007	0.00990099	7.6745e-06	0.656362	3.45886	FALSE	11475.2	0.355982	0.685602	1.36103	4.17126e-05	Tb427_110071600	FALSE
5017	Tb427-080059100	1.42048e-05	0.00990099	7.69692e-06	0.939815	4.28495	FALSE	6136.51	0.131186	0.875654	1.99865	4.1811e-05	Tb427_080059100	FALSE
1821	Tb427-030007400	0.000294817	0.00990099	7.74548e-06	0.785181	3.40331	FALSE	11375.4	0.350466	0.689791	1.35677	4.20512e-05	Tb427_030007400	FALSE
5283	Tb427-080086300:pseudogene	7.20858e-06	0.00990099	8.02109e-06	0.891582	3.32611	FALSE	4962.66	0.0970052	0.905759	1.80972	4.35081e-05	Tb427_080086300:pseudogene	FALSE
4185	Tb427-070051500	1.56468e-05	0.00990099	8.0228e-06	0.849669	4.29067	FALSE	8215.28	0.205377	0.805628	1.42807	4.35081e-05	Tb427_070051500	FALSE
8303	Tb427-110063800	3.85415e-06	0.00990099	8.08737e-06	0.548252	4.23955	FALSE	8229.26	0.204825	0.809424	1.64663	4.38337e-05	Tb427_110063800	FALSE
4721	Tb427-080028600	0.00108976	0.00990099	8.10754e-06	0.747835	3.35749	FALSE	18334.2	0.980775	0.314267	1.17746	4.39185e-05	Tb427_080028600	FALSE
4920	Tb427-080048700	0.00123537	0.00990099	8.15427e-06	0.780443	4.64325	FALSE	14027.9	0.520828	0.566885	1.27439	4.4147e-05	Tb427_080048700	FALSE
4107	Tb427-070043700	4.19734e-07	0.00990099	8.16852e-06	0.624304	3.9079	FALSE	7600.29	0.18085	0.831414	1.82441	4.41994e-05	Tb427_070043700	FALSE
4158	Tb427-070048800	3.20954e-05	0.00990099	8.19537e-06	0.556058	4.58822	FALSE	10608.1	0.309003	0.724738	1.40876	4.43199e-05	Tb427_070048800	FALSE
1935	Tb427-030018800	2.93476e-06	0.00990099	8.23329e-06	0.30697	3.9282	FALSE	6597.86	0.145973	0.862435	1.74443	4.45002e-05	Tb427_030018800	FALSE
6616	Tb427-100054300	0.000151324	0.00990099	8.27555e-06	0.915517	2.87963	FALSE	14239.6	0.53443	0.56034	1.2705	4.47036e-05	Tb427_100054300	TRUE
3069	Tb427-050030800	2.04487e-06	0.00990099	8.34419e-06	0.870431	3.17777	FALSE	9478.41	0.256829	0.765838	1.47685	4.50493e-05	Tb427_050030800	FALSE
2971	Tb427-050020400	0.000297267	0.00990099	8.36381e-06	0.91476	3.99377	FALSE	14288.6	0.541614	0.551832	1.217	4.51301e-05	Tb427_050020400	FALSE
5669	Tb427-090043700	0.000103107	0.00990099	8.37048e-06	0.465695	3.5677	FALSE	11879.2	0.38146	0.661911	1.32446	4.51409e-05	Tb427_090043700	FALSE
3598	Tb427-060040500	9.49167e-06	0.00990099	8.43801e-06	0.42678	4.0802	FALSE	9730.72	0.266848	0.760733	1.51026	4.54798e-05	Tb427_060040500	FALSE
8460	Tb427-110079500	1.12391e-06	0.00990099	8.48066e-06	0.680377	3.87664	FALSE	12563.3	0.419	0.640445	1.41881	4.56843e-05	Tb427_110079500	FALSE
8105	Tb427-110043800	2.48015e-06	0.00990099	8.63491e-06	0.697557	4.8059	FALSE	9110.07	0.24007	0.781414	1.61548	4.64894e-05	Tb427_110043800	FALSE
3832	Tb427-070013500	1.58171e-05	0.00990099	8.65834e-06	0.439207	1.49875	FALSE	10186.9	0.290204	0.736126	1.40931	4.65897e-05	Tb427_070013500	FALSE
5304	Tb427-080088600	3.47004e-05	0.00990099	8.67117e-06	0.454776	2.36635	FALSE	9159.15	0.241606	0.780366	1.44679	4.66328e-05	Tb427_080088600	FALSE
1504	Tb427-010031100	0.00012449	0.00990099	8.74764e-06	0.240152	4.68555	FALSE	10668.8	0.311776	0.723691	1.43047	4.7018e-05	Tb427_010031100	FALSE
8101	Tb427-110043400	0.000528785	0.00990099	8.79785e-06	0.448693	2.20498	FALSE	10224.1	0.291043	0.736911	1.28578	4.72616e-05	Tb427_110043400	FALSE
6802	Tb427-100073200	3.99296e-05	0.00990099	8.879e-06	0.907346	3.43504	FALSE	6750.63	0.150925	0.857853	1.61433	4.76711e-05	Tb427_100073200	FALSE
4328	Tb427-070066000	0.000390848	0.00990099	9.13013e-06	0.198951	4.28447	FALSE	11484.4	0.357583	0.682984	1.34105	4.89923e-05	Tb427_070066000	FALSE
7714	Tb427-100170800	4.399e-06	0.00990099	9.14244e-06	0.589676	4.28345	FALSE	14058.5	0.519415	0.572906	1.30883	4.90312e-05	Tb427_100170800	FALSE
9407	Tb427-110183200	0.00244477	0.00990099	9.30192e-06	0.597883	4.89865	FALSE	9674.4	0.26494	0.759162	1.36926	4.98589e-05	Tb427_110183200	FALSE
3263	Tb427-050051800	0.000109378	0.00990099	9.32759e-06	0.0358101	3.2134	FALSE	5531.96	0.113057	0.890707	1.64435	4.99689e-05	Tb427_050051800	TRUE
3439	Tb427-060023000	0.00125342	0.00990099	9.34827e-06	0.499315	4.38311	FALSE	16459.4	0.73972	0.43377	1.1996	5.0052e-05	Tb427_060023000	FALSE
2893	Tb427-050012300	8.40107e-06	0.00990099	9.3753e-06	0.752729	1.00007	FALSE	6016.01	0.127897	0.875654	1.61952	5.0169e-05	Tb427_050012300	FALSE
1729	Tb427-020026300	-2.59387e-07	0.00990099	9.54058e-06	0.592867	2.91532	FALSE	7442.27	0.176379	0.831414	1.61389	5.10252e-05	Tb427_020026300	FALSE
5605	Tb427-090036800	7.16937e-05	0.00990099	9.57073e-06	0.99339	3.07487	FALSE	13333	0.473073	0.596597	1.33864	5.11583e-05	Tb427_090036800	FALSE
3141	Tb427-050038000	3.7271e-07	0.00990099	9.62885e-06	0.100278	1.00024	FALSE	10154.1	0.287888	0.740183	1.45678	5.14405e-05	Tb427_050038000	FALSE
2626	Tb427-040036700	9.31097e-07	0.00990099	9.68543e-06	0.0708822	4.11485	FALSE	6162.65	0.132182	0.874607	1.62532	5.17143e-05	Tb427_040036700	FALSE
7758	Tb427-110008500	0.000460892	0.00990099	9.76891e-06	0.732813	3.21774	FALSE	14624.4	0.570905	0.529581	1.24448	5.21313e-05	Tb427_110008500	FALSE
5833	Tb427-090060100	0.000236949	0.00990099	9.80853e-06	0.974831	3.66909	FALSE	14691	0.571165	0.53678	1.25762	5.2314e-05	Tb427_090060100	FALSE
6206	Tb427-100012200	4.1258e-05	0.00990099	9.83975e-06	0.977313	3.76869	FALSE	6992.5	0.158693	0.852487	1.66655	5.24516e-05	Tb427_100012200	FALSE
5405	Tb427-090015800	1.45429e-05	0.00990099	9.8753e-06	0.385946	4.4769	FALSE	12373.3	0.407227	0.648822	1.38349	5.26122e-05	Tb427_090015800	FALSE
3209	Tb427-050044800	1.02429e-05	0.00990099	9.93616e-06	0.461529	3.29382	FALSE	14205.2	0.532933	0.561126	1.33013	5.28783e-05	Tb427_050044800	FALSE
7409	Tb427-100137600:pseudogene	1.18484e-05	0.00990099	9.93101e-06	0.673666	2.73871	FALSE	11282.5	0.345717	0.693455	1.32779	5.28783e-05	Tb427_100137600:pseudogene	FALSE
6192	Tb427-100010800	3.64477e-05	0.00990099	1.00223e-05	0.363379	3.52017	FALSE	6996.94	0.159716	0.848822	1.66434	5.33076e-05	Tb427_100010800	FALSE
6583	Tb427-100051000	6.53927e-05	0.00990099	1.02434e-05	0.370284	3.72033	FALSE	8534.35	0.216152	0.800524	1.38606	5.44537e-05	Tb427_100051000	FALSE
8524	Tb427-110085900	5.58124e-06	0.00990099	1.03943e-05	0.254638	3.83704	FALSE	7700.57	0.185079	0.825131	1.4871	5.52255e-05	Tb427_110085900	FALSE
3032	Tb427-050026700	3.42942e-06	0.00990099	1.04008e-05	0.635336	3.92999	FALSE	12003.6	0.386774	0.661257	1.4397	5.52295e-05	Tb427_050026700	FALSE
2640	Tb427-040038300	0.00970101	0.00990099	1.04307e-05	0.816878	4.54226	FALSE	18157.9	0.965499	0.315576	1.1292	5.5358e-05	Tb427_040038300	FALSE
4541	Tb427-080008100	3.82775e-06	0.00990099	1.04781e-05	0.866217	4.32392	FALSE	5946.22	0.125616	0.879581	1.80315	5.55791e-05	Tb427_080008100	FALSE
6443	Tb427-100036900	3.94091e-05	0.00990099	1.05504e-05	0.127895	3.83715	FALSE	6512.04	0.143485	0.86322	1.80491	5.59319e-05	Tb427_100036900	FALSE
8927	Tb427-110134300	0.000304991	0.00990099	1.05966e-05	0.139096	3.78455	FALSE	15636.9	0.650665	0.490445	1.23607	5.61461e-05	Tb427_110134300	FALSE
6606	Tb427-100053300	1.94519e-05	0.00990099	1.0627e-05	0.881723	2.79088	FALSE	8878.19	0.23196	0.783246	1.43717	5.62766e-05	Tb427_100053300	FALSE
8780	Tb427-110119300	1.06164e-05	0.00990099	1.0652e-05	0.200149	4.75629	FALSE	7149.96	0.164539	0.845812	1.89562	5.63783e-05	Tb427_110119300	FALSE
3609	Tb427-060041600	2.49527e-05	0.00990099	1.08419e-05	0.990474	3.77159	FALSE	11304.1	0.348065	0.689529	1.44775	5.7352e-05	Tb427_060041600	FALSE
5224	Tb427-080079900	0.00100318	0.00990099	1.0959e-05	0.613508	1.00097	FALSE	21007.5	1.5707	0.12945	1.10941	5.79396e-05	Tb427_080079900	FALSE
8270	Tb427-110060500	5.19418e-06	0.00990099	1.10668e-05	0.466545	1.00042	FALSE	9138.75	0.240804	0.781152	1.43742	5.8478e-05	Tb427_110060500	FALSE
7755	Tb427-110008200	0.000488798	0.00990099	1.11313e-05	0.329794	4.45717	FALSE	8319.88	0.207116	0.809686	1.49643	5.87864e-05	Tb427_110008200	FALSE
9408	Tb427-110183300	4.49069e-07	0.00990099	1.12227e-05	0.766577	4.32895	FALSE	6962.6	0.158659	0.849607	1.6973	5.92369e-05	Tb427_110183300	FALSE
7610	Tb427-100158500	2.26497e-05	0.00990099	1.13012e-05	0.494514	4.23776	FALSE	9635.63	0.264397	0.757592	1.48417	5.96187e-05	Tb427_100158500	FALSE
7768	Tb427-110009500	0.00124727	0.00990099	1.14701e-05	0.315568	4.31668	FALSE	14294.8	0.540715	0.554058	1.30392	6.04442e-05	Tb427_110009500	FALSE
3631	Tb427-060043800	2.05589e-05	0.00990099	1.14657e-05	0.0768435	3.06969	FALSE	13633.1	0.488575	0.593325	1.26755	6.04442e-05	Tb427_060043800	TRUE
5482	Tb427-090024400	0.000233592	0.00990099	1.14881e-05	0.883993	4.1504	FALSE	15856.6	0.670607	0.479712	1.23264	6.05062e-05	Tb427_090024400	FALSE
7662	Tb427-100164400	0.000259942	0.00990099	1.16638e-05	0.246334	3.28876	FALSE	7684.86	0.183852	0.827487	1.48668	6.13983e-05	Tb427_100164400	FALSE
4733	Tb427-080029800	1.40958e-06	0.00990099	1.17808e-05	0.509016	2.40007	FALSE	8543.06	0.21593	0.803534	1.5207	6.19804e-05	Tb427_080029800	FALSE
7635	Tb427-100161700	3.81142e-05	0.00990099	1.18817e-05	0.758474	3.0978	FALSE	13509.9	0.476571	0.606152	1.28878	6.24774e-05	Tb427_100161700	FALSE
7091	Tb427-100104000	5.88149e-08	0.00990099	1.19302e-05	0.429749	1.00024	FALSE	7520.91	0.178301	0.831806	1.61232	6.2698e-05	Tb427_100104000	FALSE
1673	Tb427-020020600	9.83488e-05	0.00990099	1.1941e-05	0.148286	4.39102	FALSE	6829.51	0.153044	0.857068	1.56711	6.27211e-05	Tb427_020020600	FALSE
318	Tb427-000288500:pseudogene	0.000206977	0.00990099	1.20012e-05	0.891557	3.40532	FALSE	2142.51	0.0315493	0.96911	2.64273	6.29691e-05	Tb427_000288500:pseudogene	FALSE
2839	Tb427-050006700	0.00418567	0.00990099	1.19982e-05	0.275845	3.22079	FALSE	13993.7	0.513437	0.577356	1.23089	6.29691e-05	Tb427_050006700	FALSE
5276	Tb427-080085600	1.98372e-06	0.00990099	1.23815e-05	0.536943	1.00087	FALSE	7862.79	0.190919	0.820681	1.53396	6.49293e-05	Tb427_080085600	FALSE
3445	Tb427-060023600	0.000115747	0.00990099	1.25135e-05	0.119699	4.3021	FALSE	11542.5	0.358431	0.686649	1.32935	6.55861e-05	Tb427_060023600	FALSE
4039	Tb427-070036900	1.26063e-05	0.00990099	1.2681e-05	0.896675	3.6125	FALSE	5766.37	0.119927	0.88534	1.65256	6.6428e-05	Tb427_070036900	FALSE
6723	Tb427-100065100	4.67528e-05	0.00990099	1.28356e-05	0.601378	3.07981	FALSE	8647.88	0.221559	0.793848	1.47783	6.72014e-05	Tb427_100065100	FALSE
4917	Tb427-080048400	1.5856e-06	0.00990099	1.28746e-05	0.402542	3.56684	FALSE	3715.86	0.065042	0.937565	2.56668	6.73691e-05	Tb427_080048400	TRUE
6043	Tb427-090083600	6.54993e-07	0.00990099	1.28841e-05	0.892961	4.22647	FALSE	8591.37	0.219235	0.79712	1.42636	6.73825e-05	Tb427_090083600	FALSE
6477	Tb427-100040300	1.93373e-05	0.00990099	1.29587e-05	0.419434	1.28123	FALSE	8889.8	0.231903	0.784031	1.44532	6.7736e-05	Tb427_100040300	FALSE
9274	Tb427-110169600	8.08344e-07	0.00990099	1.30701e-05	0.0844451	1.00014	FALSE	7611.41	0.182211	0.826178	1.59395	6.82817e-05	Tb427_110169600	FALSE
3246	Tb427-050048500	0.000139947	0.00990099	1.34037e-05	0.167281	3.66968	FALSE	445.119	0.0048195	0.995026	61.33	6.99723e-05	Tb427_050048500	FALSE
8291	Tb427-110062600	1.40556e-05	0.00990099	1.34082e-05	0.458814	3.74778	FALSE	7981.66	0.19539	0.816885	1.63784	6.99723e-05	Tb427_110062600	FALSE
9370	Tb427-110179400	1.02684e-05	0.00990099	1.35628e-05	0.141836	4.06183	FALSE	11481.8	0.357479	0.682723	1.37868	7.07412e-05	Tb427_110179400	FALSE
1478	Tb427-010028100	0.000111093	0.00990099	1.3648e-05	0.806796	4.57312	FALSE	12217.9	0.396886	0.657592	1.27483	7.11475e-05	Tb427_010028100	FALSE
7992	Tb427-110032200	0.000147875	0.00990099	1.36616e-05	0.327768	3.40645	FALSE	9341.59	0.250346	0.771204	1.33685	7.11799e-05	Tb427_110032200	FALSE
6347	Tb427-100026800	2.54257e-06	0.00990099	1.38305e-05	0.0383717	4.47348	FALSE	9601.32	0.26321	0.758377	1.74238	7.20209e-05	Tb427_100026800	FALSE
9200	Tb427-110162200	0.000653785	0.00990099	1.38731e-05	0.540211	4.32437	FALSE	13078.9	0.451038	0.618586	1.37256	7.22043e-05	Tb427_110162200	FALSE
3446	Tb427-060023700	1.22992e-05	0.00990099	1.38823e-05	0.648095	3.67455	FALSE	8123.06	0.201456	0.810209	1.39179	7.22135e-05	Tb427_060023700	FALSE
3607	Tb427-060041400	0.00785968	0.00990099	1.41381e-05	0.458721	4.24705	FALSE	16761.3	0.76995	0.418848	1.22408	7.35045e-05	Tb427_060041400	FALSE
6623	Tb427-100055000	5.43796e-05	0.00990099	1.42429e-05	0.733489	3.88717	FALSE	12539.1	0.419667	0.63678	1.24694	7.40094e-05	Tb427_100055000	FALSE
7637	Tb427-100161900	0.00148442	0.00990099	1.42614e-05	0.846045	2.99231	FALSE	7463.73	0.176016	0.833246	1.42362	7.40663e-05	Tb427_100161900	FALSE
9175	Tb427-110159700	2.12051e-05	0.00990099	1.42813e-05	0.730674	4.57511	FALSE	6257.64	0.135324	0.870681	1.88618	7.41296e-05	Tb427_110159700	FALSE
4821	Tb427-080038700	0.000544814	0.00990099	1.44502e-05	0.0456757	4.17725	FALSE	4790.81	0.0923566	0.908901	1.63093	7.49661e-05	Tb427_080038700	FALSE
3392	Tb427-060017200	1.98161e-05	0.00990099	1.45223e-05	0.564297	4.71318	FALSE	12030.7	0.387714	0.662696	1.40464	7.53e-05	Tb427_060017200	FALSE
8442	Tb427-110077700	3.80952e-06	0.00990099	1.45419e-05	0.959294	3.64456	FALSE	6739.89	0.151154	0.856021	1.77939	7.53613e-05	Tb427_110077700	FALSE
8398	Tb427-110073300	2.54347e-06	0.00990099	1.47679e-05	0.0232912	3.32277	FALSE	8522.89	0.216854	0.798168	1.56105	7.64916e-05	Tb427_110073300	FALSE
5406	Tb427-090015900	7.50501e-05	0.00990099	1.47866e-05	0.230899	3.25182	FALSE	9078.51	0.239743	0.778272	1.46644	7.65477e-05	Tb427_090015900	FALSE
7182	Tb427-100114300	6.91562e-05	0.00990099	1.48018e-05	0.778914	3.72007	FALSE	10448.6	0.303009	0.725916	1.28806	7.65855e-05	Tb427_100114300	FALSE
8032	Tb427-110036200	0.000170338	0.00990099	1.49515e-05	0.405962	3.36101	FALSE	12645.7	0.425319	0.633115	1.3529	7.73188e-05	Tb427_110036200	FALSE
4313	Tb427-070064300	2.67432e-05	0.00990099	1.49932e-05	0.76996	2.1996	FALSE	9565.43	0.259702	0.764921	1.39809	7.74927e-05	Tb427_070064300	FALSE
4814	Tb427-080038000	0	0.00990099	1.50112e-05	0.0457268	1.00011	FALSE	5813.22	0.121843	0.88233	1.82351	7.75448e-05	Tb427_080038000	FALSE
6057	Tb427-090085000	0.000287478	0.00990099	1.50846e-05	0.484814	3.99365	FALSE	8840.36	0.22924	0.788613	1.5752	7.78823e-05	Tb427_090085000	FALSE
8996	Tb427-110141300	8.45418e-07	0.00990099	1.51393e-05	0.895925	4.55975	FALSE	4379.92	0.0815475	0.921728	2.26321	7.81231e-05	Tb427_110141300	FALSE
9034	Tb427-110145400	3.53155e-05	0.00990099	1.525e-05	0.826549	3.59374	FALSE	9522.91	0.258113	0.766099	1.37079	7.86526e-05	Tb427_110145400	FALSE
2450	Tb427-040018700	4.01172e-06	0.00990099	1.53554e-05	0.603278	3.52659	FALSE	5978.52	0.126703	0.878141	1.77615	7.91539e-05	Tb427_040018700	FALSE
3959	Tb427-070027100	7.41682e-05	0.00990099	1.5376e-05	0.58999	4.28061	FALSE	8618.05	0.219904	0.796466	1.50709	7.92179e-05	Tb427_070027100	FALSE
3225	Tb427-050046400	4.57149e-06	0.00990099	1.53865e-05	0.808623	4.10372	FALSE	6480.53	0.142403	0.864529	1.97892	7.92296e-05	Tb427_050046400	FALSE
8415	Tb427-110075000	0.00194652	0.00990099	1.54665e-05	0.797452	1.55725	FALSE	19192.1	1.11938	0.261518	1.13678	7.95995e-05	Tb427_110075000	FALSE
7088	Tb427-100103700	1.82764e-05	0.00990099	1.54961e-05	0.676029	3.98291	FALSE	9290.39	0.249353	0.768979	1.39725	7.97096e-05	Tb427_100103700	FALSE
3251	Tb427-050050600	2.71507e-05	0.00990099	1.55057e-05	0.00724842	4.39451	FALSE	11448.6	0.35603	0.683115	1.38241	7.97165e-05	Tb427_050050600	FALSE
5097	Tb427-080067100	0.000225444	0.00990099	1.55369e-05	0.235557	4.12248	FALSE	13181.3	0.459184	0.610864	1.23805	7.97999e-05	Tb427_080067100	FALSE
1662	Tb427-020019500	0.0306342	0.00990099	1.55384e-05	0.43621	1.0006	FALSE	22412.7	2.16417	0.0373037	1.06063	7.97999e-05	Tb427_020019500	FALSE
4132	Tb427-070046200	0.000200165	0.00990099	1.56121e-05	0.841283	3.74468	FALSE	11551.9	0.361763	0.678665	1.34697	8.0136e-05	Tb427_070046200	FALSE
4996	Tb427-080057000:pseudogene	7.06425e-07	0.00990099	1.57395e-05	0.655877	1.00059	FALSE	8663.57	0.222482	0.792539	1.51357	8.0747e-05	Tb427_080057000:pseudogene	FALSE
6825	Tb427-100076700	0.000250709	0.00990099	1.57559e-05	0.21803	3.76766	FALSE	9401.26	0.252072	0.771728	1.33364	8.07887e-05	Tb427_100076700	FALSE
4606	Tb427-080016700	7.42938e-05	0.00990099	1.59237e-05	0.832803	4.10305	FALSE	12930.6	0.439972	0.628403	1.25034	8.16057e-05	Tb427_080016700	FALSE
4578	Tb427-080011800	2.66419e-05	0.00990099	1.60817e-05	0.101372	3.46659	FALSE	12017.8	0.38923	0.656414	1.29854	8.23719e-05	Tb427_080011800	FALSE
7551	Tb427-100152600	0.00078091	0.00990099	1.66745e-05	0.469034	2.7853	FALSE	14337.3	0.543621	0.551702	1.18339	8.53634e-05	Tb427_100152600	FALSE
7305	Tb427-100127100	2.20041e-05	0.00990099	1.67369e-05	0.430242	3.77203	FALSE	8837.29	0.228722	0.790314	1.41981	8.56374e-05	Tb427_100127100	FALSE
4424	Tb427-070076500	4.82841e-06	0.00990099	1.72373e-05	0.502714	4.605	FALSE	10491.2	0.304973	0.724869	1.66985	8.81511e-05	Tb427_070076500	FALSE
6454	Tb427-100038000	1.51075e-05	0.00990099	1.73689e-05	0.905314	4.7323	FALSE	9156.63	0.244511	0.771466	1.42073	8.87773e-05	Tb427_100038000	FALSE
6938	Tb427-100088100	0.000160155	0.00990099	1.81012e-05	0.648032	2.72483	FALSE	8679.46	0.22317	0.791754	1.38427	9.24717e-05	Tb427_100088100	FALSE
4515	Tb427-080005500	8.91891e-05	0.00990099	1.81226e-05	0.789301	4.81606	FALSE	10328.1	0.294117	0.739398	1.39157	9.24834e-05	Tb427_080005500	FALSE
2073	Tb427-030033900	7.89928e-06	0.00990099	1.81212e-05	0.719709	4.33782	FALSE	14516.5	0.560683	0.539791	1.36194	9.24834e-05	Tb427_030033900	FALSE
4726	Tb427-080029100	6.44813e-06	0.00990099	1.83331e-05	0.385547	4.17262	FALSE	7953.11	0.194399	0.817801	1.7794	9.35086e-05	Tb427_080029100	FALSE
1572	Tb427-020010000	0.000859276	0.00990099	1.8357e-05	0.341058	2.01732	FALSE	10782.6	0.318969	0.713874	1.2724	9.35809e-05	Tb427_020010000	FALSE
7158	Tb427-100110700	2.15267e-06	0.00990099	1.83719e-05	0.899866	2.18679	FALSE	7386.1	0.172955	0.837827	1.59385	9.36077e-05	Tb427_100110700	FALSE
7390	Tb427-100135700	0.0546026	0.00990099	1.85061e-05	0.919073	2.59091	FALSE	21562.4	1.77906	0.0862565	1.06676	9.42418e-05	Tb427_100135700	FALSE
7004	Tb427-100095300	0.000412171	0.00990099	1.85554e-05	0.879714	3.32568	FALSE	8634.43	0.220393	0.796597	1.4276	9.43937e-05	Tb427_100095300	FALSE
3906	Tb427-070021000:pseudogene	6.57818e-05	0.00990099	1.855e-05	0.0175138	1.00031	FALSE	15037.9	0.59955	0.518455	1.22422	9.43937e-05	Tb427_070021000:pseudogene	FALSE
8017	Tb427-110034700	0.00034726	0.00990099	1.85811e-05	0.235579	3.90237	FALSE	7776.36	0.186696	0.826702	1.47176	9.44748e-05	Tb427_110034700	FALSE
9108	Tb427-110153000	0.000988439	0.00990099	1.87035e-05	0.73947	3.61718	FALSE	6830.63	0.153752	0.853927	1.51902	9.50473e-05	Tb427_110153000	FALSE
1958	Tb427-030021100	9.55581e-05	0.00990099	1.87521e-05	0.593218	4.20685	FALSE	10630.5	0.311731	0.719634	1.3394	9.52447e-05	Tb427_030021100	FALSE
7734	Tb427-110006100	4.63752e-05	0.00990099	1.87836e-05	0.93921	4.52715	FALSE	4846.42	0.0935158	0.910602	2.18459	9.53543e-05	Tb427_110006100	FALSE
5460	Tb427-090021800	0.000326284	0.00990099	1.88134e-05	0.795987	4.7859	FALSE	6687.31	0.14942	0.856675	1.55124	9.54556e-05	Tb427_090021800	FALSE
6166	Tb427-100008200	0.000846486	0.00990099	1.88768e-05	0.0523706	4.48273	FALSE	10636.6	0.309797	0.725	1.37295	9.57272e-05	Tb427_100008200	FALSE
2067	Tb427-030033300	0.0164817	0.00990099	1.89374e-05	0.983245	2.79969	FALSE	22103	1.854	0.0882199	1.10401	9.59844e-05	Tb427_030033300	FALSE
6954	Tb427-100089700	0.000821972	0.00990099	1.89701e-05	0.835717	4.66992	FALSE	12732.6	0.429573	0.632068	1.2474	9.61001e-05	Tb427_100089700	FALSE
4590	Tb427-080013000	1.18504e-06	0.00990099	1.90401e-05	0.581478	4.53566	FALSE	8948.4	0.234196	0.784686	1.60897	9.64044e-05	Tb427_080013000	FALSE
6097	Tb427-090089100	7.73269e-05	0.00990099	1.90848e-05	0.484996	4.39153	FALSE	12983.1	0.448692	0.614791	1.30984	9.65801e-05	Tb427_090089100	FALSE
9069	Tb427-110149000	2.4927e-05	0.00990099	1.93494e-05	0.123995	4.10607	FALSE	8516.62	0.216581	0.797775	1.42512	9.78167e-05	Tb427_110149000	FALSE
2329	Tb427-040006600	0.000110278	0.00990099	1.93395e-05	0.190705	4.64555	FALSE	13903.5	0.50807	0.579581	1.29247	9.78167e-05	Tb427_040006600	FALSE
2370	Tb427-040010700	3.25273e-07	0.00990099	1.97488e-05	0.71483	2.81422	FALSE	8049.96	0.198579	0.813613	1.57971	9.97842e-05	Tb427_040010700	FALSE
6287	Tb427-100020400	3.837e-05	0.00990099	2.00242e-05	0.193835	4.77796	FALSE	8545.46	0.217107	0.798953	1.6329	0.000101123	Tb427_100020400	FALSE
9422	Tb427-110184700	0.00117494	0.00990099	2.03375e-05	0.855377	3.3226	FALSE	12521.5	0.41745	0.639791	1.33657	0.000102652	Tb427_110184700	FALSE
7853	Tb427-110018100	5.4031e-06	0.00990099	2.06096e-05	0.0915651	3.12333	FALSE	9237.06	0.245818	0.775524	1.40306	0.000103971	Tb427_110018100	FALSE
6848	Tb427-100079000	0.000186028	0.00990099	2.10172e-05	0.0106808	3.96682	FALSE	11713.7	0.368331	0.677618	1.26776	0.000105972	Tb427_100079000	FALSE
2241	Tb427-030053100	5.31157e-05	0.00990099	2.1042e-05	0.585308	4.00252	FALSE	9638.48	0.264326	0.757984	1.38149	0.000106041	Tb427_030053100	FALSE
4982	Tb427-080055600	2.67697e-05	0.00990099	2.11521e-05	0.933726	2.68514	FALSE	7500.97	0.177464	0.83233	1.45005	0.000106541	Tb427_080055600	FALSE
5905	Tb427-090068100	0.000268688	0.00990099	2.12957e-05	0.650368	4.70962	FALSE	10517.7	0.302589	0.733901	1.4793	0.000107208	Tb427_090068100	FALSE
4241	Tb427-070057100	0.000410027	0.00990099	2.15998e-05	0.0772473	3.28807	FALSE	7844.37	0.19049	0.819503	1.48682	0.000108683	Tb427_070057100	FALSE
6876	Tb427-100081800	0.029677	0.00990099	2.17119e-05	0.146557	2.92931	FALSE	20446.7	1.42095	0.157461	1.09171	0.000109191	Tb427_100081800	FALSE
633	Tb427-000654900:pseudogene	6.03487e-05	0.00990099	2.17752e-05	0.0904242	4.04542	FALSE	5396.12	0.108992	0.895288	1.68195	0.000109452	Tb427_000654900:pseudogene	FALSE
6556	Tb427-100048300	0.00116748	0.00990099	2.2258e-05	0.135183	2.62381	FALSE	16787	0.764803	0.427749	1.18774	0.000111821	Tb427_100048300	FALSE
2624	Tb427-040036500	1.28885e-05	0.00990099	2.22945e-05	0.260563	4.61534	FALSE	9581.12	0.260061	0.765707	1.53493	0.000111946	Tb427_040036500	FALSE
4000	Tb427-070031200	9.5377e-05	0.00990099	2.23177e-05	0.527807	4.34444	FALSE	6871.53	0.155673	0.850916	1.67136	0.000112005	Tb427_070031200	FALSE
8698	Tb427-110104600	0.000197308	0.00990099	2.26036e-05	0.912834	3.67759	FALSE	12482.4	0.415306	0.640969	1.23275	0.000113381	Tb427_110104600	FALSE
8948	Tb427-110136400	3.3047e-05	0.00990099	2.27296e-05	0.917361	4.05569	FALSE	4084.32	0.0739017	0.928141	2.08769	0.000113954	Tb427_110136400	FALSE
3983	Tb427-070029500	7.52665e-05	0.00990099	2.2997e-05	0.982989	1.00047	FALSE	12625.1	0.424348	0.633639	1.26884	0.000115235	Tb427_070029500	FALSE
1540	Tb427-020006700	0.000556842	0.00990099	2.31692e-05	0.793758	4.23803	FALSE	9509.05	0.257617	0.765183	1.33672	0.000116038	Tb427_020006700	FALSE
7770	Tb427-110009700	0.0629121	0.00990099	2.33327e-05	0.0600034	2.76298	FALSE	21103	1.62443	0.113351	1.09227	0.000116796	Tb427_110009700	FALSE
7173	Tb427-100113400	9.35365e-05	0.00990099	2.37683e-05	0.921028	3.3929	FALSE	9086.52	0.238571	0.782723	1.39015	0.000118865	Tb427_100113400	FALSE
4033	Tb427-070036300	0.000920805	0.00990099	2.37706e-05	0.319948	3.75249	FALSE	10657.4	0.312124	0.72055	1.31362	0.000118865	Tb427_070036300	FALSE
5953	Tb427-090074600	0.00559465	0.00990099	2.38513e-05	0.671298	2.09807	FALSE	19837.5	1.23377	0.225785	1.11439	0.000119207	Tb427_090074600	FALSE
8777	Tb427-110119000	0.00055438	0.00990099	2.42208e-05	0.967829	4.6035	FALSE	10582.3	0.308297	0.724084	1.40574	0.000120992	Tb427_110119000	FALSE
4054	Tb427-070038400	7.64405e-05	0.00990099	2.43623e-05	0.161019	2.50781	FALSE	4894.37	0.0953777	0.905759	1.62994	0.000121636	Tb427_070038400	FALSE
2382	Tb427-040011900	0.000534954	0.00990099	2.45254e-05	0.467805	4.47233	FALSE	14346.1	0.545946	0.549084	1.21721	0.000122387	Tb427_040011900	FALSE
5364	Tb427-090011400	4.75862e-06	0.00990099	2.46129e-05	0.161722	1.00027	FALSE	12907.5	0.442313	0.621597	1.31008	0.00012276	Tb427_090011400	FALSE
2476	Tb427-040021300	0.000346412	0.00990099	2.48893e-05	0.966177	4.80415	FALSE	11689.9	0.365955	0.681545	1.38141	0.000124075	Tb427_040021300	FALSE
415	Tb427-000481600:pseudogene	5.79418e-07	0.00990099	2.49632e-05	0.508065	4.19712	FALSE	5774.26	0.120208	0.885995	1.94982	0.00012438	Tb427_000481600:pseudogene	FALSE
8188	Tb427-110052200	2.46435e-05	0.00990099	2.53439e-05	0.0682173	3.51697	FALSE	6730.39	0.150364	0.857984	1.97367	0.000126212	Tb427_110052200	FALSE
6765	Tb427-100069500	0.0093202	0.00990099	2.59198e-05	0.362688	3.89396	FALSE	18342.8	0.98748	0.306283	1.11767	0.000129013	Tb427_100069500	FALSE
5593	Tb427-090035600	4.14687e-05	0.00990099	2.59546e-05	0.894841	4.46006	FALSE	4888.01	0.0945711	0.909948	1.92787	0.00012912	Tb427_090035600	FALSE
5187	Tb427-080076200	0.000667642	0.00990099	2.60912e-05	0.831153	3.4155	FALSE	14210.4	0.535653	0.556283	1.27074	0.000129733	Tb427_080076200	FALSE
3685	Tb427-060049800	0.00526152	0.00990099	2.61622e-05	0.518549	4.19225	FALSE	16128	0.707079	0.449346	1.16109	0.00013002	Tb427_060049800	FALSE
7359	Tb427-100132500	4.2123e-06	0.00990099	2.64066e-05	0.682931	3.42565	FALSE	9193.51	0.243657	0.77801	1.61204	0.000131167	Tb427_100132500	FALSE
1640	Tb427-020017300	9.4961e-06	0.00990099	2.65252e-05	0.286431	3.10828	FALSE	6480.31	0.142659	0.862827	1.62437	0.000131688	Tb427_020017300	FALSE
9319	Tb427-110174100	0.000433155	0.00990099	2.66637e-05	0.428332	4.15102	FALSE	10175.2	0.288213	0.740707	1.36556	0.000132308	Tb427_110174100	FALSE
7550	Tb427-100152500	6.25532e-06	0.00990099	2.69503e-05	0.67872	1.00033	FALSE	9912.88	0.276021	0.75	1.40088	0.000133662	Tb427_100152500	FALSE
1475	Tb427-010027800	7.82098e-06	0.00990099	2.7032e-05	0.788082	3.67697	FALSE	2009.56	0.0293525	0.970681	6.95339	0.000133998	Tb427_010027800	FALSE
3482	Tb427-060028900	0.000291753	0.00990099	2.70461e-05	0.441412	4.4495	FALSE	9830.3	0.273588	0.749476	1.44324	0.000134	Tb427_060028900	FALSE
4408	Tb427-070074100	0.00198132	0.00990099	2.7062e-05	0.677904	4.11865	FALSE	11789.5	0.374997	0.667801	1.22171	0.00013401	Tb427_070074100	FALSE
8078	Tb427-110041100	1.83201e-06	0.00990099	2.71124e-05	0.370757	3.44606	FALSE	6580.25	0.145657	0.861387	1.87362	0.000134191	Tb427_110041100	FALSE
6068	Tb427-090086100	6.85172e-05	0.00990099	2.71536e-05	0.141603	3.81467	FALSE	8971.05	0.235034	0.781675	1.35668	0.000134326	Tb427_090086100	FALSE
4981	Tb427-080055500	3.04211e-06	0.00990099	2.73514e-05	0.0743448	3.15045	FALSE	8727.41	0.225509	0.788874	1.46696	0.000135167	Tb427_080055500	FALSE
6947	Tb427-100089000	0.00141823	0.00990099	2.73419e-05	0.770434	3.82514	FALSE	9736.47	0.2684	0.754319	1.26503	0.000135167	Tb427_100089000	FALSE
8301	Tb427-110063600	0.00550246	0.00990099	2.75086e-05	0.580147	4.15202	FALSE	17882.3	0.911131	0.347644	1.11933	0.000135875	Tb427_110063600	FALSE
3476	Tb427-060026700	7.71438e-06	0.00990099	2.78835e-05	0.13483	4.12603	FALSE	6735.2	0.150684	0.85733	1.94268	0.000137656	Tb427_060026700	FALSE
6577	Tb427-100050400	3.82914e-05	0.00990099	2.79118e-05	0.917208	4.39702	FALSE	7084.81	0.162847	0.844895	1.46502	0.000137656	Tb427_100050400	FALSE
6233	Tb427-100015000	0.201086	0.00990099	2.78992e-05	0.913148	2.56144	FALSE	21641.9	1.87458	0.0658377	1.05262	0.000137656	Tb427_100015000	FALSE
3262	Tb427-050051700	0.00257221	0.00990099	2.79827e-05	0.570714	2.80298	FALSE	10063.8	0.283447	0.742801	1.29156	0.000137935	Tb427_050051700	FALSE
5225	Tb427-080080000	7.57787e-05	0.00990099	2.83391e-05	0.313199	3.55108	FALSE	8161.39	0.202553	0.810209	1.61164	0.000139621	Tb427_080080000	FALSE
8181	Tb427-110051500	6.7071e-06	0.00990099	2.85445e-05	0.435582	3.82052	FALSE	9261.94	0.247348	0.773691	1.66711	0.000140562	Tb427_110051500	FALSE
7597	Tb427-100157200	6.17623e-06	0.00990099	2.86915e-05	0.728762	4.8073	FALSE	5812.39	0.12102	0.886387	2.07505	0.000141213	Tb427_100157200	TRUE
5385	Tb427-090013500	0.000572074	0.00990099	2.87343e-05	0.572981	4.71493	FALSE	6815.37	0.15268	0.856545	1.74779	0.000141352	Tb427_090013500	FALSE
5068	Tb427-080064200	0.0014924	0.00990099	2.90674e-05	0.535772	4.66376	FALSE	11151.3	0.337769	0.701178	1.46895	0.000142918	Tb427_080064200	FALSE
5704	Tb427-090047200	0.0116995	0.00990099	2.91387e-05	0.138655	2.00655	FALSE	18668.5	1.05707	0.27199	1.11731	0.000143196	Tb427_090047200	FALSE
7846	Tb427-110017400	4.64214e-05	0.00990099	2.91794e-05	0.460931	4.42469	FALSE	9497.99	0.258097	0.763743	1.58421	0.000143324	Tb427_110017400	FALSE
2941	Tb427-050017100	0.000263543	0.00990099	2.9245e-05	0.666683	3.76283	FALSE	6780.22	0.151564	0.857853	1.55072	0.000143573	Tb427_050017100	FALSE
4562	Tb427-080010200:pseudogene	5.54032e-05	0.00990099	2.9376e-05	0.848007	3.8912	FALSE	6990.08	0.158875	0.850916	1.68642	0.000144143	Tb427_080010200:pseudogene	FALSE
8432	Tb427-110076700	0	0.00990099	2.95823e-05	0.131078	1.0002	FALSE	8512.53	0.216625	0.797775	1.59052	0.000145082	Tb427_110076700	FALSE
2359	Tb427-040009600	0.000137657	0.00990099	2.97002e-05	0.104217	3.77961	FALSE	13086.3	0.448227	0.624869	1.29393	0.000145587	Tb427_040009600	FALSE
6220	Tb427-100013700	7.09086e-05	0.00990099	2.97408e-05	0.910186	3.50323	FALSE	5609.19	0.115269	0.889136	1.61777	0.000145638	Tb427_100013700	FALSE
6106	Tb427-090090000	0.00164138	0.00990099	2.97257e-05	0.265249	1.00059	FALSE	19542.6	1.19224	0.23233	1.12072	0.000145638	Tb427_090090000	FALSE
8060	Tb427-110039100	0.000116992	0.00990099	3.04827e-05	0.998991	4.21293	FALSE	8722.55	0.225131	0.790052	1.432	0.000149196	Tb427_110039100	FALSE
8660	Tb427-110100600	0.00014836	0.00990099	3.0692e-05	0.984997	3.35023	FALSE	7627.11	0.181227	0.831545	1.45876	0.000150144	Tb427_110100600	FALSE
2027	Tb427-030029300	0.00054316	0.00990099	3.10404e-05	0.407656	4.37109	FALSE	8620.37	0.22001	0.795942	1.39532	0.000151772	Tb427_030029300	FALSE
6098	Tb427-090089200	0.00359339	0.00990099	3.14288e-05	0.927287	3.86692	FALSE	15525.4	0.643477	0.491754	1.20113	0.000153594	Tb427_090089200	FALSE
4472	Tb427-070081300	0.000118094	0.00990099	3.15314e-05	0.207772	4.34616	FALSE	7182.44	0.166116	0.842932	1.55492	0.000154017	Tb427_070081300	FALSE
6639	Tb427-100056600	2.088e-05	0.00990099	3.1553e-05	0.174827	4.33625	FALSE	11068.7	0.333546	0.704188	1.43083	0.000154045	Tb427_100056600	FALSE
6764	Tb427-100069400	8.80435e-06	0.00990099	3.21086e-05	0.400355	4.58651	FALSE	4495.56	0.0845148	0.918063	2.34684	0.000156679	Tb427_100069400	TRUE
6694	Tb427-100062200	0.0782924	0.00990099	3.22823e-05	0.579436	2.95628	FALSE	21987.8	1.85965	0.0849476	1.08577	0.000157447	Tb427_100062200	FALSE
8518	Tb427-110085300:pseudogene	0.00214263	0.00990099	3.23043e-05	0.594175	3.82293	FALSE	9349.79	0.250982	0.768586	1.33137	0.000157475	Tb427_110085300:pseudogene	FALSE
1347	Tb427-010012700	9.58196e-06	0.00990099	3.23493e-05	0.90056	4.85251	FALSE	9229.31	0.246157	0.773429	1.62337	0.000157615	Tb427_010012700	FALSE
5249	Tb427-080082400	4.25066e-06	0.00990099	3.24442e-05	0.963652	3.00992	FALSE	5497.73	0.112268	0.891099	1.66645	0.000157998	Tb427_080082400	FALSE
7966	Tb427-110029600	0.000705883	0.00990099	3.27149e-05	0.637082	3.42064	FALSE	14647.1	0.56849	0.536649	1.30137	0.000159237	Tb427_110029600	FALSE
6569	Tb427-100049600	0.0650749	0.00990099	3.29921e-05	0.787	3.35243	FALSE	20712.4	1.51859	0.130497	1.10624	0.000160505	Tb427_100049600	FALSE
9061	Tb427-110148100	0.000123961	0.00990099	3.32566e-05	0.621644	4.01218	FALSE	3520.85	0.0603091	0.941623	1.87342	0.000161711	Tb427_110148100	FALSE
2126	Tb427-030040700	3.47225e-05	0.00990099	3.35507e-05	0.0534934	3.82172	FALSE	6731.66	0.15076	0.856283	1.4648	0.000163059	Tb427_030040700	TRUE
1770	Tb427-020030400	6.89936e-05	0.00990099	3.37004e-05	0.35537	2.3181	FALSE	13481.1	0.485555	0.584293	1.25437	0.000163705	Tb427_020030400	FALSE
1217	Tb427-000829500:pseudogene	5.46704e-05	0.00990099	3.38001e-05	0.650592	3.54918	FALSE	2407.62	0.036728	0.963874	3.51947	0.000164106	Tb427_000829500:pseudogene	FALSE
[truncated: 7,708 more rows]
[truncated: 14 more columns]

## Sheet: DE genes (<0.01, >1.5)
DE analysis for only CCR genes (FC > 1.5, adjusted p=value < 0.01)
Crozier and Benz CCR colums indicte is proteins for a CCR gene were CCR (TRUE), undetected, or detected but not CCR (FALSE) in each study.
order	gene	fix.pv	emp.pv	para.pv	ad.pv	rank	zinf	aic	expv.mean	expv.zero	meanlogFC	BHadjust.pvalue	gene ID	Archer et al CCR	Crozier et al CCR	Benz et al CCR
8383	Tb427-110071800	0	0.00990099	3.93062e-09	0.736409	3.86359	FALSE	10687.2	0.314288	0.720026	1.57495	3.16639e-08	Tb427_110071800	FALSE	undetected	TRUE
7043	Tb427-100099200	0.0016898	0.00990099	0.000238612	0.392384	4.56862	FALSE	5654.66	0.116257	0.889005	1.59462	0.000975692	Tb427_100099200	FALSE	FALSE	TRUE
4722	Tb427-080028700	0	0.00990099	0	0.15319	4.99871	FALSE	17081	0.992858	0.403272	7.74671	0	Tb427_080028700	TRUE	TRUE	TRUE
6203	Tb427-100011900	0	0.00990099	2.40484e-218	0.085939	4.9885	FALSE	13549.7	0.534365	0.583639	8.16891	1.79271e-215	Tb427_100011900	TRUE	TRUE	TRUE
7243	Tb427-100120400	0	0.00990099	4.09574e-183	0.772531	4.99557	FALSE	15722.4	0.74448	0.465052	5.50968	1.58767e-180	Tb427_100120400	TRUE	TRUE	TRUE
8492	Tb427-110082700	0	0.00990099	2.45768e-135	0.145411	4.96873	FALSE	13603.8	0.534469	0.571859	5.10165	4.10644e-133	Tb427_110082700	TRUE	TRUE	TRUE
6058	Tb427-090085100	0	0.00990099	5.17911e-132	0.189845	4.97136	FALSE	10909.9	0.407475	0.672513	17.1616	7.72166e-130	Tb427_090085100	TRUE	TRUE	TRUE
2797	Tb427-040054600	0	0.00990099	1.02308e-114	0.661622	4.99158	FALSE	9311.61	0.270806	0.768717	6.50604	1.33982e-112	Tb427_040054600	TRUE	TRUE	TRUE
8357	Tb427-110069200	0	0.00990099	4.62286e-104	0.792408	4.98329	FALSE	10690.3	0.341349	0.712696	5.42896	5.33334e-102	Tb427_110069200	FALSE	TRUE	TRUE
4840	Tb427-080040700	0	0.00990099	1.62967e-75	0.519483	4.96896	FALSE	14581.7	0.585285	0.539529	3.60457	1.24356e-73	Tb427_080040700	TRUE	TRUE	TRUE
9343	Tb427-110176500	0	0.00990099	3.97516e-75	0.930312	4.81435	FALSE	8075.9	0.211677	0.805366	5.5949	2.9863e-73	Tb427_110176500	TRUE	TRUE	TRUE
8137	Tb427-110047000	0	0.00990099	3.28924e-72	0.259865	4.9792	FALSE	8679.7	0.244061	0.779581	11.7402	2.27686e-70	Tb427_110047000	TRUE	TRUE	TRUE
6715	Tb427-100064300	0	0.00990099	2.69739e-56	0.587563	4.96514	FALSE	9953.29	0.2939	0.746073	4.01452	1.25299e-54	Tb427_100064300	TRUE	undetected	TRUE
8563	Tb427-110089800	0	0.00990099	8.32683e-56	0.686759	4.96168	FALSE	9310.73	0.258358	0.768848	3.73667	3.82442e-54	Tb427_110089800	TRUE	undetected	TRUE
5831	Tb427-090059900	0	0.00990099	3.36897e-54	0.733523	4.92525	FALSE	9259.94	0.252702	0.776832	2.60839	1.49081e-52	Tb427_090059900	FALSE	FALSE	TRUE
4123	Tb427-070045300	0	0.00990099	3.63199e-36	0.973006	4.92981	FALSE	9302.9	0.2561	0.774869	3.39372	1.06659e-34	Tb427_070045300	TRUE	FALSE	TRUE
7212	Tb427-100117300	0	0.00990099	1.36878e-27	0.321212	4.939	FALSE	10607.5	0.316577	0.721073	2.55264	2.94775e-26	Tb427_100117300	TRUE	undetected	TRUE
9245	Tb427-110166700	0	0.00990099	1.92957e-26	0.910011	4.88535	FALSE	6617.04	0.151626	0.859162	4.84734	3.95337e-25	Tb427_110166700	TRUE	undetected	TRUE
6225	Tb427-100014200	0	0.00990099	5.29294e-20	0.450941	4.7422	FALSE	6608.03	0.148899	0.862173	2.80569	8.63533e-19	Tb427_100014200	TRUE	undetected	TRUE
4781	Tb427-080034700	0.000230399	0.00990099	6.24187e-05	0.911287	4.42609	FALSE	7224.59	0.16735	0.842408	1.64588	0.000289703	Tb427_080034700	FALSE	FALSE	TRUE
2336	Tb427-040007300	0.00158196	0.00990099	0.000446868	0.70318	3.30759	FALSE	7294.86	0.169525	0.840576	1.53478	0.00172671	Tb427_040007300	FALSE	FALSE	TRUE
2702	Tb427-040044500	0	0.00990099	2.99295e-41	0.0900351	4.95714	FALSE	5038.02	0.107698	0.899084	15.0462	1.01061e-39	Tb427_040044500	TRUE	undetected	TRUE
2219	Tb427-030050500	0	0.00990099	1.39325e-33	0.00499324	4.85876	FALSE	10273.9	0.299297	0.741623	2.79738	3.68906e-32	Tb427_030050500	TRUE	FALSE	TRUE
4968	Tb427-080053900	0	0.00990099	1.79733e-30	0.92532	4.90418	FALSE	10946.6	0.334614	0.706021	2.44878	4.25866e-29	Tb427_080053900	TRUE	TRUE	TRUE
9251	Tb427-110167300	0	0.00990099	7.85319e-25	0.504692	4.92093	FALSE	7100.01	0.168231	0.846073	3.46427	1.55953e-23	Tb427_110167300	TRUE	FALSE	TRUE
1977	Tb427-030023000	0	0.00990099	2.68743e-20	0.760867	4.30811	FALSE	9166.75	0.246132	0.772513	2.16317	4.44434e-19	Tb427_030023000	FALSE	TRUE	TRUE
3805	Tb427-070010700	9.87329e-07	0.00990099	4.42907e-07	0.719886	3.79011	FALSE	9845.06	0.274947	0.748037	1.58347	2.85767e-06	Tb427_070010700	FALSE	FALSE	TRUE
8308	Tb427-110064300	0.009321	0.019802	0.00169196	0.393176	4.12273	FALSE	6842.06	0.152712	0.858901	1.52871	0.00562497	Tb427_110064300	FALSE	undetected	TRUE
7963	Tb427-110029300	0	0.00990099	3.38299e-07	0.0534692	3.97381	FALSE	7641.05	0.182656	0.830105	1.86845	2.21368e-06	Tb427_110029300	FALSE	FALSE	TRUE
1450	Tb427-010024500	2.27488e-06	0.00990099	6.39191e-05	0.740595	1.00018	FALSE	6144.57	0.132027	0.87199	1.66067	0.000295958	Tb427_010024500	FALSE	FALSE	TRUE
6726	Tb427-100065400	2.77861e-05	0.00990099	9.82012e-05	0.40668	3.63645	FALSE	7136.57	0.164241	0.845419	1.65632	0.00043775	Tb427_100065400	FALSE	undetected	TRUE
9237	Tb427-110165900	0	0.00990099	6.08019e-267	0.597971	4.9947	FALSE	17613.5	0.992879	0.356283	5.80265	9.82051e-264	Tb427_110165900	TRUE	TRUE	TRUE
4558	Tb427-080009800	0	0.00990099	1.12978e-233	0.946138	4.99874	FALSE	9691.5	0.337542	0.737042	53.9068	1.36859e-230	Tb427_080009800	TRUE	undetected	TRUE
2796	Tb427-040054500	0	0.00990099	1.33811e-151	0.024936	4.93843	FALSE	8159.16	0.239339	0.785079	8.79367	2.75906e-149	Tb427_040054500	TRUE	undetected	TRUE
6958	Tb427-100090100	0	0.00990099	5.77211e-128	0.909096	4.97808	FALSE	8196.91	0.254373	0.780628	37.8809	8.47538e-126	Tb427_100090100	TRUE	TRUE	TRUE
2528	Tb427-040026500	0	0.00990099	2.42711e-107	0.368539	4.9932	FALSE	9714.27	0.291003	0.748298	10.1055	2.94014e-105	Tb427_040026500	TRUE	TRUE	TRUE
1406	Tb427-010020000	0	0.00990099	4.55042e-101	0.505278	4.97143	FALSE	9805.01	0.297257	0.73233	4.36049	4.84595e-99	Tb427_010020000	TRUE	TRUE	TRUE
8992	Tb427-110140900	0	0.00990099	1.46939e-58	0.804273	4.89944	FALSE	10507.2	0.317726	0.715445	2.57653	7.34016e-57	Tb427_110140900	FALSE	undetected	TRUE
4784	Tb427-080035000	0	0.00990099	4.33657e-58	0.919551	4.96605	FALSE	8676.15	0.235223	0.78678	5.59873	2.14417e-56	Tb427_080035000	TRUE	FALSE	TRUE
6613	Tb427-100054000	0	0.00990099	6.12154e-56	0.982486	4.77759	FALSE	7642.26	0.193818	0.81623	5.04166	2.82494e-54	Tb427_100054000	TRUE	TRUE	TRUE
5310	Tb427-090005000	0	0.00990099	4.46079e-34	0.833085	4.73128	FALSE	3000.01	0.0533895	0.945681	25.873	1.21773e-32	Tb427_090005000	TRUE	TRUE	TRUE
6755	Tb427-100068500	0	0.00990099	1.59343e-19	0.0556325	4.74098	FALSE	10608.4	0.314369	0.718717	2.07685	2.55239e-18	Tb427_100068500	FALSE	TRUE	TRUE
5563	Tb427-090032500	0	0.00990099	2.82736e-06	0.485154	3.87387	FALSE	7981.15	0.195917	0.816361	1.84176	1.62611e-05	Tb427_090032500	FALSE	FALSE	TRUE
9367	Tb427-110179100	0	0.00990099	6.48971e-08	0.866399	4.48886	FALSE	10788	0.321226	0.711257	1.56647	4.59399e-07	Tb427_110179100	FALSE	FALSE	TRUE
7237	Tb427-100119800	0.0053893	0.00990099	0.00104851	0.474291	3.32649	FALSE	5498.3	0.111756	0.892277	1.60752	0.00371249	Tb427_100119800	FALSE	TRUE	TRUE
7019	Tb427-100096800	0	0.00990099	5.23479e-188	0.761815	4.9885	FALSE	9344.49	0.318129	0.733246	50.4303	2.30593e-185	Tb427_100096800	TRUE	TRUE	TRUE
5533	Tb427-090029500	0	0.00990099	1.18511e-31	0.697378	4.90778	FALSE	8144.06	0.207769	0.811649	3.59999	2.92982e-30	Tb427_090029500	TRUE	FALSE	TRUE
8355	Tb427-110069000	0	0.00990099	1.57799e-25	0.725858	4.78225	FALSE	11356.4	0.354988	0.686387	1.78826	3.19254e-24	Tb427_110069000	FALSE	FALSE	TRUE
2455	Tb427-040019200	0	0.00990099	2.23645e-19	0.0225719	4.86865	FALSE	9425.23	0.256184	0.768717	1.98849	3.54141e-18	Tb427_040019200	FALSE	FALSE	TRUE
1948	Tb427-030020100	0	0.00990099	6.93342e-15	0.0448615	4.50923	FALSE	6433.33	0.143067	0.864398	3.10794	8.76033e-14	Tb427_030020100	FALSE	FALSE	TRUE
3534	Tb427-060034100	0	0.00990099	1.02422e-57	0.996349	4.95463	FALSE	9917.03	0.288312	0.744895	3.79752	5.013e-56	Tb427_060034100	TRUE	TRUE	TRUE
2052	Tb427-030031800	0	0.00990099	2.28146e-12	0.922647	4.14367	FALSE	7441.24	0.176626	0.832199	1.67519	2.38251e-11	Tb427_030031800	FALSE	TRUE	TRUE
5081	Tb427-080065500	0	0.00990099	1.19619e-25	0.560009	4.88931	FALSE	15739	0.659154	0.493586	1.5012	2.42516e-24	Tb427_080065500	FALSE	undetected	TRUE
1564	Tb427-020009200	0	0.00990099	5.35103e-07	0.529986	4.30559	FALSE	7106.94	0.163904	0.844241	1.62344	3.40715e-06	Tb427_020009200	FALSE	FALSE	TRUE
1973	Tb427-030022600	0.00312048	0.00990099	0.00233222	0.740141	4.67175	FALSE	6742.26	0.150948	0.855497	1.51114	0.00744207	Tb427_030022600	FALSE	FALSE	TRUE
6557	Tb427-100048400	0.000107544	0.019802	0.0026259	0.368459	1.00009	FALSE	5898.42	0.12377	0.881152	1.53142	0.00824615	Tb427_100048400	FALSE	undetected	TRUE
8478	Tb427-110081300	0	0.00990099	2.69461e-16	0.616007	4.75984	FALSE	6275.69	0.137449	0.868586	2.84284	3.68834e-15	Tb427_110081300	FALSE	FALSE	TRUE
9230	Tb427-110165200	0	0.00990099	9.67168e-10	0.972791	3.80363	FALSE	10970.1	0.328916	0.709031	1.58838	8.21457e-09	Tb427_110165200	TRUE	FALSE	TRUE
2624	Tb427-040036500	1.28885e-05	0.00990099	2.22945e-05	0.260563	4.61534	FALSE	9581.12	0.260061	0.765707	1.53493	0.000111946	Tb427_040036500	FALSE	FALSE	TRUE
6950	Tb427-100089300	0	0.00990099	6.38491e-54	0.0548042	4.57933	FALSE	10075.1	0.291787	0.739398	2.94776	2.79983e-52	Tb427_100089300	FALSE	TRUE	TRUE
9437	Tb427-110186200	0	0.00990099	2.07132e-31	0.421263	4.90397	FALSE	6716.15	0.155114	0.857199	3.48847	5.0562e-30	Tb427_110186200	TRUE	FALSE	TRUE
3244	Tb427-050048300	0	0.00990099	4.29176e-25	0.806783	4.45001	FALSE	9748.24	0.274765	0.748691	2.03297	8.61107e-24	Tb427_050048300	FALSE	FALSE	TRUE
4157	Tb427-070048700	0	0.00990099	1.313e-23	0.365798	4.96836	FALSE	8893.83	0.23763	0.785209	3.16988	2.47553e-22	Tb427_070048700	FALSE	FALSE	TRUE
6654	Tb427-100058100	0	0.00990099	4.67156e-13	0.352561	4.2097	FALSE	8406.57	0.214269	0.798953	1.91978	5.15041e-12	Tb427_100058100	TRUE	FALSE	TRUE
2130	Tb427-030041100	0	0.00990099	9.05956e-12	0.21661	4.80778	FALSE	5367.79	0.108971	0.899869	2.6394	9.10749e-11	Tb427_030041100	FALSE	FALSE	TRUE
5796	Tb427-090056400	0.00745429	0.019802	0.000824157	0.0382625	4.39962	FALSE	7694.09	0.184389	0.825785	1.50861	0.00300599	Tb427_090056400	FALSE	FALSE	TRUE
8802	Tb427-110121500	0	0.00990099	9.95065e-74	0.395717	4.99004	FALSE	11966.4	0.412283	0.659686	3.97601	7.09057e-72	Tb427_110121500	FALSE	TRUE	TRUE
6462	Tb427-100038800	0	0.00990099	3.2709e-45	0.0195435	4.83871	FALSE	13741.3	0.512416	0.57788	1.96157	1.20526e-43	Tb427_100038800	FALSE	undetected	TRUE
4175	Tb427-070050500	0	0.00990099	2.89681e-30	0.719056	4.64441	FALSE	12622.5	0.427779	0.63822	1.73273	6.8304e-29	Tb427_070050500	FALSE	undetected	TRUE
7017	Tb427-100096600	0	0.00990099	2.96892e-35	0.787751	4.95162	FALSE	6587.92	0.151851	0.863089	3.98919	8.4623e-34	Tb427_100096600	FALSE	FALSE	TRUE
3596	Tb427-060040300	0.00275099	0.00990099	0.00105156	0.243138	3.61152	FALSE	7011.23	0.159895	0.847775	1.55221	0.00371786	Tb427_060040300	FALSE	FALSE	TRUE
5375	Tb427-090012500	0.00106177	0.00990099	0.00142264	0.0813933	4.4814	FALSE	5487.53	0.111581	0.892408	1.66854	0.00484597	Tb427_090012500	FALSE	FALSE	TRUE
7287	Tb427-100125300	0	0.00990099	3.71265e-37	0.692523	4.91028	FALSE	10458.4	0.313918	0.720288	2.73231	1.11391e-35	Tb427_100125300	TRUE	FALSE	TRUE
4353	Tb427-070068500	1.70503e-07	0.00990099	5.78909e-07	0.900914	3.74139	FALSE	9268.58	0.248718	0.770157	1.50191	3.6644e-06	Tb427_070068500	FALSE	FALSE	TRUE
5772	Tb427-090054000	1.20062e-06	0.00990099	1.89444e-06	0.937551	3.81646	FALSE	8730.47	0.2256	0.790314	1.53871	1.11537e-05	Tb427_090054000	FALSE	FALSE	TRUE
7059	Tb427-100100800	3.14985e-05	0.00990099	6.95326e-05	0.706619	3.58722	FALSE	9053.17	0.238367	0.780366	1.5901	0.000319204	Tb427_100100800	FALSE	FALSE	TRUE
1660	Tb427-020019300	0	0.00990099	1.62465e-13	0.905372	4.73176	FALSE	6161.93	0.133193	0.875654	2.5714	1.85448e-12	Tb427_020019300	FALSE	undetected	TRUE
3157	Tb427-050039600	0	0.00990099	3.1528e-08	0.197724	3.93093	FALSE	8551.3	0.218213	0.797251	1.64658	2.29555e-07	Tb427_050039600	FALSE	TRUE	TRUE
3653	Tb427-060046000	0	0.00990099	2.48079e-73	0.654781	4.98511	FALSE	12287.2	0.422311	0.652749	3.67801	1.74213e-71	Tb427_060046000	TRUE	FALSE	TRUE
8688	Tb427-110103400	0	0.00990099	6.83971e-64	0.870189	4.9872	FALSE	5901.48	0.139028	0.871204	36.9651	3.89904e-62	Tb427_110103400	TRUE	FALSE	TRUE
7326	Tb427-100129200	0	0.00990099	8.07345e-37	0.352469	4.91457	FALSE	5600.4	0.122413	0.883115	12.2615	2.38536e-35	Tb427_100129200	TRUE	FALSE	TRUE
8870	Tb427-110128300	0	0.00990099	4.58737e-28	0.486979	4.87008	FALSE	11664.7	0.372107	0.673822	1.88597	1.0058e-26	Tb427_110128300	FALSE	undetected	TRUE
1327	Tb427-010010700	0	0.00990099	1.77471e-17	0.639934	3.96615	FALSE	14084.5	0.525616	0.56767	1.5373	2.55933e-16	Tb427_010010700	TRUE	undetected	TRUE
9185	Tb427-110160700	0	0.00990099	3.13049e-12	0.884285	4.49088	FALSE	4474.01	0.0850935	0.917408	2.81431	3.23773e-11	Tb427_110160700	FALSE	FALSE	TRUE
8091	Tb427-110042400	0	0.00990099	3.24889e-09	0.411293	4.09232	FALSE	10302.4	0.296537	0.732592	1.50583	2.63033e-08	Tb427_110042400	FALSE	FALSE	TRUE
2096	Tb427-030037700	0	0.00990099	3.15768e-179	0.936041	4.87765	FALSE	18232	1.0396	0.309817	2.65875	1.13337e-176	Tb427_030037700	TRUE	FALSE	TRUE
7433	Tb427-100140000	0	0.00990099	1.07662e-13	0.787166	4.26147	FALSE	8149.27	0.204219	0.810079	2.15566	1.25252e-12	Tb427_100140000	TRUE	FALSE	TRUE
2144	Tb427-030042500	0	0.00990099	8.82521e-12	0.168587	4.74701	FALSE	12995.6	0.442927	0.63089	1.5599	8.90887e-11	Tb427_030042500	FALSE	FALSE	TRUE
1605	Tb427-020013500	5.40439e-05	0.00990099	0.000177175	0.331506	3.10768	FALSE	7036.41	0.160493	0.849346	1.65421	0.000746733	Tb427_020013500	FALSE	FALSE	TRUE
1639	Tb427-020017200	3.61626e-07	0.00990099	3.1692e-06	0.130742	3.64665	FALSE	6722.18	0.150793	0.85589	1.58761	1.80769e-05	Tb427_020017200	FALSE	TRUE	TRUE
2285	Tb427-030057500	1.02319e-06	0.00990099	1.1079e-07	0.803965	4.91751	FALSE	13684.1	0.483573	0.60877	1.5801	7.6581e-07	Tb427_030057500	FALSE	FALSE	TRUE
4837	Tb427-080040400	0	0.00990099	5.49366e-154	0.0415942	4.99107	FALSE	11358.1	0.392936	0.688089	6.59458	1.15737e-151	Tb427_080040400	TRUE	FALSE	TRUE
2282	Tb427-030057200	0	0.00990099	1.70508e-147	0.398904	4.99317	FALSE	10638.5	0.353423	0.69712	4.5069	3.17768e-145	Tb427_030057200	TRUE	FALSE	TRUE
7467	Tb427-100143800	0	0.00990099	2.97368e-08	0.692932	4.81812	FALSE	9475.51	0.255211	0.77212	1.84426	2.17003e-07	Tb427_100143800	FALSE	FALSE	TRUE
2871	Tb427-050010000	0	0.00990099	2.03299e-20	0.94158	4.85299	FALSE	8523.92	0.219132	0.8	2.57747	3.37937e-19	Tb427_050010000	TRUE	FALSE	TRUE
8717	Tb427-110106500	0	0.00990099	3.79676e-08	0.840983	4.85771	FALSE	6232.76	0.135129	0.870157	1.77691	2.74176e-07	Tb427_110106500	FALSE	undetected	TRUE
9410	Tb427-110183500	0	0.00990099	1.27842e-12	0.32563	4.36619	FALSE	9335.76	0.251482	0.773037	2.02745	1.36896e-11	Tb427_110183500	TRUE	TRUE	TRUE
5092	Tb427-080066600	0	0.00990099	1.32043e-12	0.916162	4.3437	FALSE	16008.6	0.686251	0.472382	1.55718	1.41239e-11	Tb427_080066600	FALSE	FALSE	TRUE
2069	Tb427-030033500	2.50349e-05	0.00990099	3.2101e-06	0.352873	2.1348	FALSE	7615.44	0.182152	0.826702	1.50127	1.82887e-05	Tb427_030033500	FALSE	undetected	TRUE
4000	Tb427-070031200	9.5377e-05	0.00990099	2.23177e-05	0.527807	4.34444	FALSE	6871.53	0.155673	0.850916	1.67136	0.000112005	Tb427_070031200	FALSE	FALSE	TRUE
5690	Tb427-090045800	0	0.00990099	1.48511e-24	0.0497682	4.25272	FALSE	8893.28	0.236812	0.778403	2.05691	2.9134e-23	Tb427_090045800	FALSE	FALSE	TRUE
3966	Tb427-070027800	0	0.00990099	1.05847e-18	0.437769	4.78717	FALSE	8486.18	0.218278	0.796728	2.11455	1.62562e-17	Tb427_070027800	FALSE	FALSE	TRUE
5785	Tb427-090055300	0	0.00990099	2.59054e-16	0.18178	3.57568	FALSE	10109.8	0.289883	0.735471	1.86865	3.5509e-15	Tb427_090055300	FALSE	FALSE	TRUE
6347	Tb427-100026800	2.54257e-06	0.00990099	1.38305e-05	0.0383717	4.47348	FALSE	9601.32	0.26321	0.758377	1.74238	7.20209e-05	Tb427_100026800	FALSE	FALSE	TRUE
4901	Tb427-080046800	0	0.00990099	4.47558e-170	0.189307	4.98321	FALSE	19129.3	1.12617	0.292147	1.88147	1.31433e-167	Tb427_080046800	FALSE	TRUE	TRUE
9445	Tb427-110187000	0	0.00990099	1.5723e-59	0.693592	4.81183	FALSE	11161.3	0.354523	0.689529	2.77791	8.10487e-58	Tb427_110187000	FALSE	TRUE	TRUE
8280	Tb427-110061500	0	0.00990099	1.07085e-57	0.76698	4.96963	FALSE	7379.44	0.192938	0.825524	14.6804	5.21488e-56	Tb427_110061500	TRUE	FALSE	TRUE
7379	Tb427-100134600	0	0.00990099	3.35509e-27	0.735166	4.78786	FALSE	11607.9	0.370535	0.678796	2.71524	7.1303e-26	Tb427_100134600	FALSE	FALSE	TRUE
2929	Tb427-050015900	0	0.00990099	3.42065e-29	0.502541	4.93006	FALSE	13113.3	0.462463	0.607853	1.69906	7.7092e-28	Tb427_050015900	TRUE	FALSE	TRUE
6376	Tb427-100029700	6.37822e-06	0.00990099	1.31399e-06	0.967352	3.60824	FALSE	6395.56	0.139522	0.86767	1.75635	7.93881e-06	Tb427_100029700	FALSE	FALSE	TRUE
1981	Tb427-030023400	0.00211732	0.00990099	0.000663472	0.314324	3.85825	FALSE	5734.16	0.118736	0.886257	1.78895	0.00247201	Tb427_030023400	FALSE	FALSE	TRUE
5186	Tb427-080076100	0	0.00990099	1.2646e-60	0.558668	4.79401	FALSE	9879.91	0.285775	0.744503	3.90065	6.69683e-59	Tb427_080076100	TRUE	FALSE	TRUE
8835	Tb427-110124800	0	0.00990099	7.79249e-20	0.733655	4.77035	FALSE	9453.78	0.259328	0.767016	2.83677	1.26494e-18	Tb427_110124800	FALSE	FALSE	TRUE
7644	Tb427-100162600	0	0.00990099	1.26629e-14	0.161522	3.91088	FALSE	10199	0.291092	0.738613	1.54463	1.56725e-13	Tb427_100162600	TRUE	undetected	TRUE
5903	Tb427-090067900	0	0.00990099	2.61493e-45	0.778946	4.6553	FALSE	7506.98	0.189072	0.821859	4.82903	9.70929e-44	Tb427_090067900	FALSE	FALSE	TRUE
5393	Tb427-090014600	0	0.00990099	7.29014e-10	0.262071	4.13432	FALSE	9196.77	0.244857	0.776047	1.6015	6.29108e-09	Tb427_090014600	FALSE	FALSE	TRUE
8172	Tb427-110050600	0	0.00990099	1.29792e-22	0.534141	4.17903	FALSE	8264.1	0.209478	0.805497	2.60616	2.36431e-21	Tb427_110050600	FALSE	undetected	TRUE
4590	Tb427-080013000	1.18504e-06	0.00990099	1.90401e-05	0.581478	4.53566	FALSE	8948.4	0.234196	0.784686	1.60897	9.64044e-05	Tb427_080013000	FALSE	undetected	TRUE
4511	Tb427-080005100:pseudogene	0	0.00990099	7.6182e-85	0.563401	4.99721	FALSE	18867.9	0.942112	0.414136	3.53811	6.65117e-83	Tb427_080005100:pseudogene	FALSE	undetected	undetected
2242	Tb427-030053200:pseudogene	0	0.00990099	5.24033e-36	0.776858	4.63325	FALSE	15552.3	0.660357	0.475524	1.59173	1.53426e-34	Tb427_030053200:pseudogene	FALSE	undetected	undetected
4512	Tb427-080005200	0	0.00990099	6.1755e-34	0.140299	4.99053	FALSE	14871.5	0.555513	0.593848	3.58488	1.66704e-32	Tb427_080005200	FALSE	undetected	undetected
6158	Tb427-100007400	0	0.00990099	5.32632e-33	0.495909	4.71581	FALSE	4626.58	0.0913461	0.912173	6.58531	1.36554e-31	Tb427_100007400	FALSE	undetected	undetected
7139	Tb427-100108800	0	0.00990099	2.22715e-30	0.73505	4.99601	FALSE	14642.3	0.511847	0.671204	2.51899	5.26423e-29	Tb427_100108800	TRUE	undetected	undetected
8153	Tb427-110048600	0	0.00990099	9.12961e-30	0.0181538	4.93216	FALSE	7092.85	0.167601	0.846204	3.74738	2.10655e-28	Tb427_110048600	FALSE	undetected	undetected
4309	Tb427-070063900	0	0.00990099	2.38135e-27	0.0849186	4.88904	FALSE	6089.51	0.132708	0.878141	3.3932	5.08318e-26	Tb427_070063900	FALSE	undetected	undetected
7788	Tb427-110011500	0	0.00990099	1.48083e-24	0.293992	4.50578	FALSE	11621.2	0.369825	0.674738	2.01256	2.9109e-23	Tb427_110011500	FALSE	undetected	undetected
1106	Tb427-000799500:pseudogene	0	0.00990099	4.38866e-24	0.570083	4.32196	FALSE	2692.98	0.0432945	0.958377	4.15514	8.43859e-23	Tb427_000799500:pseudogene	FALSE	undetected	undetected
6196	Tb427-100011200	0	0.00990099	1.08555e-21	0.924961	4.59198	FALSE	10677.4	0.315195	0.723298	2.20981	1.86856e-20	Tb427_100011200	FALSE	FALSE	undetected
3991	Tb427-070030300	0	0.00990099	5.39398e-21	0.616014	4.87566	FALSE	10344.4	0.299948	0.731152	2.3241	9.13864e-20	Tb427_070030300	TRUE	undetected	undetected
4344	Tb427-070067600	0	0.00990099	1.45712e-19	0.133394	4.72374	FALSE	15729.7	0.65808	0.494503	1.68535	2.3379e-18	Tb427_070067600	FALSE	undetected	undetected
2800	Tb427-040054900	0	0.00990099	2.28662e-19	0.0826653	4.90258	FALSE	5224.29	0.106746	0.900393	4.40502	3.61495e-18	Tb427_040054900	FALSE	FALSE	undetected
9317	Tb427-110173900	0	0.00990099	9.51766e-19	0.636567	4.75245	FALSE	8581.91	0.220805	0.796466	2.06691	1.46406e-17	Tb427_110173900	FALSE	undetected	undetected
3311	Tb427-060008700:pseudogene	0	0.00990099	1.31398e-17	0.794932	4.97102	FALSE	7267.97	0.167995	0.857984	3.01911	1.91486e-16	Tb427_060008700:pseudogene	FALSE	undetected	undetected
4401	Tb427-070073400	0	0.00990099	5.79305e-17	0.408669	4.82341	FALSE	8597.01	0.221316	0.798168	2.22961	8.21969e-16	Tb427_070073400	FALSE	FALSE	undetected
6186	Tb427-100010200	0	0.00990099	8.6873e-17	0.546521	4.75854	FALSE	9282.24	0.250158	0.770288	1.73892	1.22012e-15	Tb427_100010200	TRUE	FALSE	undetected
4247	Tb427-070057700	0	0.00990099	5.21628e-16	0.856554	4.33096	FALSE	8241.39	0.206989	0.808508	2.12232	7.02096e-15	Tb427_070057700	FALSE	FALSE	undetected
2340	Tb427-040007700	0	0.00990099	7.21784e-16	0.412071	4.78073	FALSE	4529.4	0.0863842	0.917932	3.36663	9.66134e-15	Tb427_040007700	FALSE	undetected	undetected
6309	Tb427-100022600	0	0.00990099	6.25978e-15	0.483968	4.90671	FALSE	3932.84	0.0716503	0.931675	4.63558	7.94026e-14	Tb427_100022600	TRUE	undetected	undetected
8665	Tb427-110101100	0	0.00990099	1.04184e-14	0.90304	4.20491	FALSE	3082.26	0.0522112	0.948298	5.75997	1.29942e-13	Tb427_110101100	TRUE	undetected	undetected
2637	Tb427-040038000	0	0.00990099	2.13894e-14	0.183033	4.90282	FALSE	8319.79	0.210779	0.803665	1.94675	2.63051e-13	Tb427_040038000	FALSE	undetected	undetected
4768	Tb427-080033300	0	0.00990099	2.18356e-14	0.772621	4.54752	FALSE	9014.48	0.237914	0.784293	2.08898	2.68198e-13	Tb427_080033300	FALSE	undetected	undetected
8413	Tb427-110074800	0	0.00990099	3.41542e-14	0.776346	4.82707	FALSE	11117	0.340644	0.695288	1.57658	4.12189e-13	Tb427_110074800	FALSE	undetected	undetected
4710	Tb427-080027500	0	0.00990099	3.50391e-14	0.724976	4.79105	FALSE	7396.37	0.174892	0.837696	2.29217	4.21818e-13	Tb427_080027500	FALSE	FALSE	undetected
3134	Tb427-050037300	0	0.00990099	4.28091e-14	0.0616349	4.49547	FALSE	5705.44	0.118957	0.887958	2.40821	5.10915e-13	Tb427_050037300	FALSE	undetected	undetected
9468	Tb427-110189300	0	0.00990099	5.47082e-14	0.849029	4.67746	FALSE	8284.2	0.208016	0.809031	1.98981	6.52124e-13	Tb427_110189300	FALSE	undetected	undetected
5575	Tb427-090033800	0	0.00990099	5.53605e-14	0.135622	4.65612	FALSE	2524.74	0.0402606	0.960995	5.97576	6.5909e-13	Tb427_090033800	TRUE	undetected	undetected
3099	Tb427-050033800	0	0.00990099	1.21411e-13	0.0156651	4.07585	FALSE	7467.19	0.177296	0.833901	2.03383	1.40238e-12	Tb427_050033800	FALSE	FALSE	undetected
2537	Tb427-040027400	0	0.00990099	1.28494e-13	0.740882	4.84641	FALSE	5104.26	0.102542	0.902487	3.99027	1.48074e-12	Tb427_040027400	TRUE	undetected	undetected
9204	Tb427-110162600	0	0.00990099	1.32044e-13	0.96605	4.76051	FALSE	7454.15	0.175856	0.838613	2.0718	1.51976e-12	Tb427_110162600	FALSE	FALSE	undetected
3174	Tb427-050041300	0	0.00990099	1.35889e-13	0.497786	4.15868	FALSE	4440.26	0.0843872	0.917932	3.60338	1.56216e-12	Tb427_050041300	FALSE	undetected	undetected
5840	Tb427-090061200	0	0.00990099	1.5994e-13	0.499284	4.64119	FALSE	6651.9	0.148141	0.862565	2.1203	1.82781e-12	Tb427_090061200	FALSE	undetected	undetected
4030	Tb427-070036000	0	0.00990099	1.95839e-13	0.81695	4.07312	FALSE	7062.81	0.162819	0.847382	2.06401	2.21973e-12	Tb427_070036000	FALSE	FALSE	undetected
8642	Tb427-110098800	0	0.00990099	2.40384e-13	0.618272	3.69695	FALSE	8812.02	0.230058	0.785995	1.82443	2.71194e-12	Tb427_110098800	FALSE	undetected	undetected
6978	Tb427-100092700	0	0.00990099	3.66324e-13	0.976254	4.4896	FALSE	10295.7	0.29776	0.730628	1.70165	4.06648e-12	Tb427_100092700	FALSE	undetected	undetected
6081	Tb427-090087500	0	0.00990099	3.92958e-13	0.559159	4.5858	FALSE	6830.9	0.155488	0.854058	2.40546	4.35218e-12	Tb427_090087500	FALSE	FALSE	undetected
6167	Tb427-100008300:pseudogene	0	0.00990099	5.21667e-13	0.786167	4.55419	FALSE	11104.6	0.336467	0.703796	1.85651	5.71887e-12	Tb427_100008300:pseudogene	FALSE	undetected	undetected
4037	Tb427-070036700	0	0.00990099	7.74985e-13	0.305359	4.73644	FALSE	6622.33	0.149196	0.85733	2.59104	8.43863e-12	Tb427_070036700	FALSE	FALSE	undetected
2581	Tb427-040031800	0	0.00990099	8.60774e-13	0.896337	4.8599	FALSE	5062.6	0.100893	0.90445	3.46479	9.34127e-12	Tb427_040031800	FALSE	undetected	undetected
2013	Tb427-030027900	0	0.00990099	9.57688e-13	0.897048	4.79479	FALSE	8233.78	0.20697	0.80877	2.71656	1.03582e-11	Tb427_030027900	FALSE	FALSE	undetected
6171	Tb427-100008700	0	0.00990099	9.97648e-13	0.25132	4.85484	FALSE	6438.68	0.141816	0.866361	2.36117	1.07664e-11	Tb427_100008700	TRUE	undetected	undetected
8396	Tb427-110073100	2.6274e-07	0.00990099	1.58683e-12	0.912896	4.62594	FALSE	5381.67	0.109389	0.893848	2.54591	1.68618e-11	Tb427_110073100	FALSE	undetected	undetected
5757	Tb427-090052500	0	0.00990099	1.84985e-12	0.607721	4.59585	FALSE	11583.7	0.361743	0.685995	1.68692	1.94646e-11	Tb427_090052500	FALSE	undetected	undetected
7142	Tb427-100109100	0	0.00990099	1.92867e-12	0.797195	4.9444	FALSE	9821.02	0.263124	0.787435	2.08103	2.0272e-11	Tb427_100109100	TRUE	undetected	undetected
4165	Tb427-070049500	0	0.00990099	2.174e-12	0.44304	4.54729	FALSE	10085.7	0.28435	0.745419	1.57872	2.27273e-11	Tb427_070049500	FALSE	FALSE	undetected
8144	Tb427-110047700	0	0.00990099	8.34719e-12	0.406991	4.8332	FALSE	4993.67	0.0987504	0.906283	3.55605	8.45273e-11	Tb427_110047700	FALSE	undetected	undetected
6798	Tb427-100072800	0	0.00990099	8.36871e-12	0.973159	4.15937	FALSE	7166.85	0.166054	0.844764	2.21463	8.46568e-11	Tb427_100072800	FALSE	undetected	undetected
7140	Tb427-100108900	0	0.00990099	8.91872e-12	0.606805	4.98005	FALSE	12107.2	0.368915	0.72788	2.46583	8.98653e-11	Tb427_100108900	TRUE	undetected	undetected
6235	Tb427-100015200	0	0.00990099	2.37885e-11	0.489213	4.41087	FALSE	9676.86	0.266202	0.759817	1.58885	2.33334e-10	Tb427_100015200	FALSE	undetected	undetected
8475	Tb427-110081000	0	0.00990099	7.12264e-11	0.387727	4.76553	FALSE	8667.05	0.221753	0.799084	1.82989	6.75396e-10	Tb427_110081000	FALSE	undetected	undetected
2677	Tb427-040042000	0	0.00990099	8.80104e-11	0.206722	4.53323	FALSE	8746.59	0.225777	0.793194	1.74218	8.27264e-10	Tb427_040042000	FALSE	undetected	undetected
2848	Tb427-050007600:pseudogene	0	0.00990099	9.01606e-11	0.271079	3.78257	FALSE	4526.86	0.0855827	0.920681	2.79109	8.45834e-10	Tb427_050007600:pseudogene	FALSE	undetected	undetected
1989	Tb427-030024200	0	0.00990099	9.02793e-11	0.397157	4.66849	FALSE	8379.81	0.212792	0.798298	1.659	8.46128e-10	Tb427_030024200	FALSE	undetected	undetected
2769	Tb427-040051800	0	0.00990099	9.20045e-11	0.375026	4.63278	FALSE	7018.73	0.160922	0.848429	1.8792	8.61465e-10	Tb427_040051800	FALSE	undetected	undetected
4249	Tb427-070057900	0	0.00990099	9.39021e-11	0.397437	4.53764	FALSE	7528.34	0.179338	0.831021	1.6523	8.77536e-10	Tb427_070057900	TRUE	undetected	undetected
3294	Tb427-060007000:pseudogene	0	0.00990099	1.27567e-10	0.877274	3.88552	FALSE	6255.57	0.134764	0.87644	2.08839	1.17963e-09	Tb427_060007000:pseudogene	FALSE	undetected	undetected
7141	Tb427-100109000	0	0.00990099	1.28292e-10	0.999734	4.92224	FALSE	9378.43	0.244826	0.805366	2.49396	1.18407e-09	Tb427_100109000	FALSE	undetected	undetected
4798	Tb427-080036400	0	0.00990099	1.31594e-10	0.326969	4.18071	FALSE	6828.3	0.154331	0.854319	1.94221	1.21109e-09	Tb427_080036400	FALSE	undetected	undetected
4474	Tb427-070081500	0	0.00990099	1.43902e-10	0.945022	4.42652	FALSE	9215.63	0.246702	0.773953	1.88177	1.3206e-09	Tb427_070081500	FALSE	undetected	undetected
909	Tb427-000744900:pseudogene	0	0.00990099	2.33632e-10	0.153074	4.40685	FALSE	2041.8	0.0301466	0.971204	5.92997	2.11799e-09	Tb427_000744900:pseudogene	FALSE	undetected	undetected
7549	Tb427-100152400	2.05334e-05	0.00990099	2.88569e-10	0.716888	4.49913	FALSE	9842.5	0.272728	0.753927	1.50108	2.59417e-09	Tb427_100152400	FALSE	FALSE	undetected
1803	Tb427-030005600:pseudogene	0	0.00990099	3.06665e-10	0.607518	3.32477	FALSE	8809.29	0.227353	0.794372	1.66198	2.74778e-09	Tb427_030005600:pseudogene	FALSE	undetected	undetected
6778	Tb427-100070800	0	0.00990099	3.22541e-10	0.159106	4.70524	FALSE	5771.29	0.12067	0.885209	2.3485	2.87997e-09	Tb427_100070800	FALSE	undetected	undetected
3309	Tb427-060008500	0	0.00990099	3.51799e-10	0.929285	4.91944	FALSE	14320.2	0.518878	0.599738	1.74783	3.1192e-09	Tb427_060008500	FALSE	undetected	undetected
9296	Tb427-110171800	0	0.00990099	3.79192e-10	0.917588	4.00012	FALSE	5474.03	0.112198	0.891885	2.52824	3.34982e-09	Tb427_110171800	FALSE	undetected	undetected
4324	Tb427-070065600	0	0.00990099	3.95162e-10	0.0806862	4.61188	FALSE	5549.57	0.114751	0.889136	2.42028	3.48772e-09	Tb427_070065600	FALSE	undetected	undetected
2922	Tb427-050015200	0	0.00990099	9.38108e-10	0.378454	4.60441	FALSE	13284.1	0.468841	0.603272	1.53561	7.98875e-09	Tb427_050015200	FALSE	FALSE	undetected
992	Tb427-000766300:pseudogene	0	0.00990099	1.14421e-09	0.547659	4.14143	FALSE	3925.95	0.0707101	0.933639	2.70908	9.63383e-09	Tb427_000766300:pseudogene	FALSE	undetected	undetected
2124	Tb427-030040500	0	0.00990099	1.17508e-09	0.993223	2.77485	FALSE	6242.76	0.135756	0.869764	1.97396	9.88517e-09	Tb427_030040500	FALSE	undetected	undetected
3782	Tb427-070008400	0	0.00990099	1.29982e-09	0.110074	3.64634	FALSE	7641.15	0.183051	0.827356	1.66794	1.08872e-08	Tb427_070008400	FALSE	FALSE	undetected
6680	Tb427-100060800	0	0.00990099	1.47842e-09	0.546122	4.75183	FALSE	8666.96	0.223148	0.793848	1.81211	1.23087e-08	Tb427_100060800	FALSE	FALSE	undetected
7291	Tb427-100125700	0	0.00990099	1.81905e-09	0.356968	3.855	FALSE	6934.09	0.158774	0.847906	1.85916	1.50533e-08	Tb427_100125700	FALSE	undetected	undetected
2763	Tb427-040051200	0	0.00990099	2.32243e-09	0.346054	4.6378	FALSE	4102.19	0.0751264	0.926702	3.08845	1.90573e-08	Tb427_040051200	FALSE	undetected	undetected
7670	Tb427-100165200	0	0.00990099	2.38868e-09	0.732302	3.23748	FALSE	9065.98	0.239765	0.77945	1.64054	1.95678e-08	Tb427_100165200	FALSE	undetected	undetected
3561	Tb427-060036800	1.48159e-06	0.00990099	2.69304e-09	0.0218133	4.6737	FALSE	10123.5	0.28569	0.744634	1.59295	2.19497e-08	Tb427_060036800	FALSE	FALSE	undetected
4689	Tb427-080025400	0	0.00990099	2.92842e-09	0.459457	2.31559	FALSE	8414.79	0.213646	0.799346	1.74423	2.38082e-08	Tb427_080025400	FALSE	FALSE	undetected
1234	Tb427-000835000	0	0.00990099	3.16552e-09	0.337272	4.64293	FALSE	1470.88	0.0201397	0.980236	13.3486	2.56497e-08	Tb427_000835000	FALSE	undetected	undetected
2271	Tb427-030056100	0	0.00990099	3.38807e-09	0.636087	4.36921	FALSE	5932.37	0.126225	0.878534	2.58602	2.74071e-08	Tb427_030056100	TRUE	undetected	undetected
3310	Tb427-060008600:pseudogene	0	0.00990099	3.57245e-09	0.638233	4.86187	FALSE	6813.68	0.151613	0.865445	2.18045	2.88265e-08	Tb427_060008600:pseudogene	FALSE	undetected	undetected
9421	Tb427-110184600	0	0.00990099	3.94151e-09	0.546451	4.69778	FALSE	5199.36	0.10383	0.901832	2.42145	3.17253e-08	Tb427_110184600	FALSE	FALSE	undetected
9415	Tb427-110184000	0	0.00990099	6.76404e-09	0.185031	4.81309	FALSE	4895.58	0.095364	0.909162	3.42755	5.3293e-08	Tb427_110184000	FALSE	undetected	undetected
6116	Tb427-090091000	3.74319e-07	0.00990099	6.96196e-09	0.220544	3.49075	FALSE	4685.98	0.0895992	0.912958	1.79814	5.47633e-08	Tb427_090091000	FALSE	undetected	undetected
4763	Tb427-080032800	0	0.00990099	8.80239e-09	0.6221	4.65116	FALSE	10327.5	0.293495	0.74267	1.59613	6.82978e-08	Tb427_080032800	FALSE	undetected	undetected
5095	Tb427-080066900	0	0.00990099	9.23029e-09	0.967145	3.45717	FALSE	5398.52	0.109708	0.892932	1.92238	7.15034e-08	Tb427_080066900	TRUE	undetected	undetected
2849	Tb427-050007700	0	0.00990099	1.16331e-08	0.32212	3.96474	FALSE	5972.01	0.126269	0.881152	1.97326	8.94733e-08	Tb427_050007700	FALSE	undetected	undetected
5976	Tb427-090076900	0	0.00990099	1.19131e-08	0.784044	3.93454	FALSE	6611.76	0.147101	0.860995	1.8461	9.14092e-08	Tb427_090076900	FALSE	FALSE	undetected
6006	Tb427-090079900	0	0.00990099	1.43745e-08	0.829832	4.94004	FALSE	10143.4	0.28632	0.746597	1.87972	1.09343e-07	Tb427_090079900	FALSE	FALSE	undetected
7021	Tb427-100097000	8.74105e-06	0.00990099	1.82491e-08	0.788524	4.78685	FALSE	6025.15	0.128196	0.876309	2.02096	1.37094e-07	Tb427_100097000	FALSE	undetected	undetected
6871	Tb427-100081300	0	0.00990099	2.07479e-08	0.985222	3.69085	FALSE	6904.79	0.157162	0.850524	1.59563	1.54375e-07	Tb427_100081300	FALSE	FALSE	undetected
7708	Tb427-100170200	4.62775e-06	0.00990099	2.26291e-08	0.282424	4.54749	FALSE	5097.65	0.100513	0.903796	1.89357	1.6766e-07	Tb427_100170200	FALSE	FALSE	undetected
6679	Tb427-100060700	0	0.00990099	2.41426e-08	0.34721	4.65155	FALSE	4683.75	0.0894169	0.914921	2.60378	1.78328e-07	Tb427_100060700	TRUE	undetected	undetected
1919	Tb427-030017200	9.42399e-07	0.00990099	2.48288e-08	0.978261	4.50564	FALSE	6329.12	0.13659	0.874215	1.86501	1.83117e-07	Tb427_030017200	FALSE	undetected	undetected
4023	Tb427-070035300	0	0.00990099	2.57858e-08	0.501561	3.89671	FALSE	9289.8	0.249656	0.770288	1.7042	1.89886e-07	Tb427_070035300	FALSE	FALSE	undetected
2939	Tb427-050016900	0	0.00990099	2.92473e-08	0.806732	3.90672	FALSE	7945.75	0.195166	0.815445	1.73651	2.13753e-07	Tb427_050016900	FALSE	undetected	undetected
1112	Tb427-000801100	3.75012e-06	0.00990099	3.3244e-08	0.284989	3.31865	FALSE	8168.35	0.202639	0.810079	1.54375	2.41143e-07	Tb427_000801100	FALSE	undetected	undetected
7364	Tb427-100133100:pseudogene	0	0.00990099	4.08989e-08	0.980395	3.63891	FALSE	2079.92	0.0307284	0.970681	3.93355	2.94466e-07	Tb427_100133100:pseudogene	FALSE	undetected	undetected
5238	Tb427-080081300	0	0.00990099	4.19685e-08	0.921211	4.39145	FALSE	5676.57	0.117907	0.887042	2.15881	3.01718e-07	Tb427_080081300	FALSE	undetected	undetected
1467	Tb427-010027000	1.83094e-06	0.00990099	4.44563e-08	0.425251	3.6442	FALSE	8669.72	0.223599	0.790707	1.54058	3.19367e-07	Tb427_010027000	FALSE	undetected	undetected
6794	Tb427-100072400	0	0.00990099	6.38644e-08	0.465781	3.79571	FALSE	9652.6	0.264795	0.759817	1.63198	4.52419e-07	Tb427_100072400	FALSE	FALSE	undetected
1496	Tb427-010029900	2.50244e-07	0.00990099	7.62743e-08	0.45162	4.5637	FALSE	8431.08	0.213247	0.801832	1.5326	5.36411e-07	Tb427_010029900	FALSE	undetected	undetected
8353	Tb427-110068800	1.78887e-07	0.00990099	1.12675e-07	0.110569	4.45269	FALSE	8357.74	0.210751	0.802618	1.64866	7.78288e-07	Tb427_110068800	FALSE	undetected	undetected
9097	Tb427-110151900	0	0.00990099	1.17453e-07	0.345905	4.51446	FALSE	8020.18	0.197178	0.817147	1.77933	8.09558e-07	Tb427_110151900	FALSE	undetected	undetected
8053	Tb427-110038400	0	0.00990099	1.20909e-07	0.982517	4.23641	FALSE	7391.79	0.173851	0.83678	1.81443	8.32195e-07	Tb427_110038400	FALSE	undetected	undetected
8589	Tb427-110092400	1.35534e-06	0.00990099	1.27258e-07	0.109366	4.75604	FALSE	7384.47	0.172989	0.838743	2.00788	8.74032e-07	Tb427_110092400	FALSE	undetected	undetected
3665	Tb427-060047200	0	0.00990099	1.43662e-07	0.741426	4.49009	FALSE	7959.07	0.195616	0.817147	1.85202	9.81825e-07	Tb427_060047200	FALSE	undetected	undetected
3366	Tb427-060014600	1.55676e-05	0.00990099	1.66814e-07	0.62571	4.85383	FALSE	7001.95	0.159969	0.848298	1.8678	1.13049e-06	Tb427_060014600	FALSE	undetected	undetected
2362	Tb427-040009900	5.07718e-06	0.00990099	1.72358e-07	0.855669	4.65685	FALSE	9352.58	0.250391	0.773429	1.74408	1.16561e-06	Tb427_040009900	FALSE	undetected	undetected
8547	Tb427-110088200	7.1738e-07	0.00990099	1.80061e-07	0.498668	3.96192	FALSE	4712.78	0.0903228	0.912958	2.32216	1.21516e-06	Tb427_110088200	FALSE	FALSE	undetected
5132	Tb427-080070600	0	0.00990099	2.00248e-07	0.563857	4.09219	FALSE	6077.44	0.129764	0.875916	1.79895	1.34671e-06	Tb427_080070600	FALSE	TRUE	undetected
7867	Tb427-110019500	0	0.00990099	2.07479e-07	0.275179	3.92244	FALSE	6555.27	0.144097	0.867277	2.12551	1.38955e-06	Tb427_110019500	FALSE	undetected	undetected
6509	Tb427-100043500	6.31574e-07	0.00990099	2.11933e-07	0.509369	3.7771	FALSE	7707.77	0.186097	0.823037	1.54441	1.41547e-06	Tb427_100043500	FALSE	undetected	undetected
2715	Tb427-040046400	9.11469e-07	0.00990099	2.1364e-07	0.335061	3.82472	FALSE	6298.42	0.136756	0.870026	2.18964	1.4249e-06	Tb427_040046400	FALSE	undetected	undetected
5194	Tb427-080076900	0	0.00990099	2.58035e-07	0.572442	4.06167	FALSE	7323.46	0.171765	0.837173	1.8414	1.71158e-06	Tb427_080076900	FALSE	FALSE	undetected
3215	Tb427-050045400	0	0.00990099	2.66692e-07	0.709312	4.04025	FALSE	6798.32	0.153335	0.855236	2.13509	1.76538e-06	Tb427_050045400	FALSE	FALSE	undetected
5966	Tb427-090075900	4.94801e-06	0.00990099	2.80836e-07	0.118559	2.85283	FALSE	8635.76	0.222073	0.791361	1.51553	1.85394e-06	Tb427_090075900	FALSE	FALSE	undetected
8426	Tb427-110076100	5.92754e-07	0.00990099	2.86456e-07	0.601354	4.2074	FALSE	7923.51	0.193275	0.820157	1.80238	1.88718e-06	Tb427_110076100	FALSE	undetected	undetected
7751	Tb427-110007800	6.16989e-07	0.00990099	2.9987e-07	0.662951	1.00103	FALSE	7104.49	0.163197	0.846335	1.63994	1.97153e-06	Tb427_110007800	FALSE	FALSE	undetected
1469	Tb427-010027200	0	0.00990099	3.02393e-07	0.670509	2.42577	FALSE	7796.09	0.189383	0.820288	1.60339	1.98543e-06	Tb427_010027200	FALSE	undetected	undetected
3272	Tb427-050052700:pseudogene	1.85247e-06	0.00990099	3.28559e-07	0.447644	4.69042	FALSE	8702.26	0.223817	0.79411	1.68549	2.1514e-06	Tb427_050052700:pseudogene	FALSE	undetected	undetected
5332	Tb427-090007200	3.75688e-07	0.00990099	4.44845e-07	0.70533	4.36447	FALSE	8437.55	0.213349	0.801309	1.5525	2.86826e-06	Tb427_090007200	FALSE	undetected	undetected
6761	Tb427-100069100	0	0.00990099	4.80074e-07	0.940488	4.02649	FALSE	8315.47	0.208766	0.805497	1.76853	3.07698e-06	Tb427_100069100	FALSE	undetected	undetected
5210	Tb427-080078500	1.44473e-05	0.00990099	5.4169e-07	0.306528	4.60122	FALSE	7852.66	0.189927	0.824084	1.50639	3.44457e-06	Tb427_080078500	FALSE	undetected	undetected
6861	Tb427-100080300	2.26571e-06	0.00990099	5.9049e-07	0.588775	4.62891	FALSE	7092.49	0.162539	0.84856	1.58665	3.73283e-06	Tb427_100080300	FALSE	TRUE	undetected
6215	Tb427-100013100	6.56648e-07	0.00990099	6.27515e-07	0.658667	3.71249	FALSE	9908.71	0.275799	0.751702	1.52604	3.954e-06	Tb427_100013100	FALSE	undetected	undetected
1591	Tb427-020012100	2.0973e-06	0.00990099	7.75235e-07	0.433637	1.9868	FALSE	6204.42	0.13363	0.87199	1.70091	4.83138e-06	Tb427_020012100	FALSE	TRUE	undetected
4956	Tb427-080052700	1.53276e-05	0.00990099	8.17479e-07	0.663638	3.9308	FALSE	6461.61	0.141771	0.865183	1.79114	5.08158e-06	Tb427_080052700	FALSE	undetected	undetected
4209	Tb427-070053900	3.37814e-06	0.00990099	8.59558e-07	0.55951	4.41286	FALSE	5230.08	0.104202	0.900916	2.00217	5.32607e-06	Tb427_070053900	FALSE	undetected	undetected
8658	Tb427-110100400	3.77937e-06	0.00990099	8.70108e-07	0.254306	4.01797	FALSE	5294.8	0.106299	0.897251	1.67987	5.38456e-06	Tb427_110100400	FALSE	FALSE	undetected
820	Tb427-000713200	0	0.00990099	9.40129e-07	0.0734535	1.00069	FALSE	8351.86	0.211472	0.79856	1.59456	5.78831e-06	Tb427_000713200	FALSE	undetected	undetected
5871	Tb427-090064300	4.77507e-06	0.00990099	9.83315e-07	0.758248	3.88914	FALSE	11380.9	0.351333	0.689005	1.50188	6.04268e-06	Tb427_090064300	FALSE	FALSE	undetected
768	Tb427-000700700:pseudogene	1.63174e-06	0.00990099	9.85145e-07	0.405339	3.85536	FALSE	1635.69	0.0226979	0.977487	3.81018	6.05009e-06	Tb427_000700700:pseudogene	FALSE	undetected	undetected
8392	Tb427-110072700	2.33789e-06	0.00990099	1.04799e-06	0.576187	1.00025	FALSE	8501.99	0.214401	0.80445	1.53377	6.41978e-06	Tb427_110072700	FALSE	undetected	undetected
109	Tb427-000107600:pseudogene	3.00476e-06	0.00990099	1.05783e-06	0.655688	3.97853	FALSE	4818.82	0.0930583	0.91034	1.95118	6.46776e-06	Tb427_000107600:pseudogene	FALSE	undetected	undetected
2835	Tb427-050006300	8.20134e-06	0.00990099	1.12085e-06	0.671486	4.41261	FALSE	8386.04	0.210768	0.804581	1.77187	6.83585e-06	Tb427_050006300	FALSE	undetected	undetected
8766	Tb427-110111400	1.85556e-06	0.00990099	1.18211e-06	0.623085	4.35433	FALSE	8028.35	0.197728	0.814005	1.57165	7.19587e-06	Tb427_110111400	FALSE	FALSE	undetected
288	Tb427-000278000:pseudogene	2.44739e-08	0.00990099	1.22353e-06	0.769465	3.30893	FALSE	6394.36	0.139773	0.867539	1.76265	7.42935e-06	Tb427_000278000:pseudogene	FALSE	undetected	undetected
5749	Tb427-090051700	1.003e-05	0.00990099	1.25536e-06	0.301708	3.91203	FALSE	8299.99	0.207826	0.805759	1.63502	7.61306e-06	Tb427_090051700	FALSE	undetected	undetected
9346	Tb427-110176800:pseudogene	3.08663e-05	0.00990099	1.3267e-06	0.101307	4.24462	FALSE	8022.03	0.196849	0.815576	1.55273	8.01063e-06	Tb427_110176800:pseudogene	FALSE	undetected	undetected
6210	Tb427-100012600	5.53017e-06	0.00990099	1.49762e-06	0.0819076	4.6531	FALSE	5958.11	0.12502	0.884817	2.04378	8.99219e-06	Tb427_100012600	FALSE	undetected	undetected
6772	Tb427-100070200	4.97791e-05	0.00990099	1.53531e-06	0.356759	3.67325	FALSE	3928.44	0.0702014	0.931021	2.23797	9.19856e-06	Tb427_100070200	FALSE	undetected	undetected
4210	Tb427-070054000	1.34757e-06	0.00990099	1.63357e-06	0.43787	4.38534	FALSE	8922.45	0.234043	0.782199	1.67751	9.70626e-06	Tb427_070054000	FALSE	undetected	undetected
9325	Tb427-110174700	0	0.00990099	1.93511e-06	0.400864	4.57138	FALSE	6206.02	0.133524	0.874607	1.82069	1.13725e-05	Tb427_110174700	FALSE	FALSE	undetected
2506	Tb427-040024300	7.4925e-06	0.00990099	2.09085e-06	0.224687	2.61571	FALSE	7246.75	0.16883	0.838874	1.52772	1.22654e-05	Tb427_040024300	FALSE	TRUE	undetected
7530	Tb427-100150500	2.36372e-07	0.00990099	2.15445e-06	0.644153	1.92461	FALSE	6038.29	0.128929	0.874738	1.77952	1.26309e-05	Tb427_100150500	FALSE	FALSE	undetected
2978	Tb427-050021100	2.27581e-06	0.00990099	2.25143e-06	0.115375	4.38464	FALSE	9636.17	0.265598	0.754712	1.69696	1.31675e-05	Tb427_050021100	FALSE	FALSE	undetected
3525	Tb427-060033200	1.36272e-05	0.00990099	2.27971e-06	0.96117	3.69085	FALSE	7487.98	0.176785	0.834424	1.5224	1.33168e-05	Tb427_060033200	FALSE	FALSE	undetected
6179	Tb427-100009500	1.04974e-06	0.00990099	2.2885e-06	0.364168	4.27211	FALSE	8155.65	0.201219	0.81466	1.61505	1.33601e-05	Tb427_100009500	FALSE	FALSE	undetected
9159	Tb427-110158100	1.17306e-06	0.00990099	2.45519e-06	0.844722	1.08331	FALSE	6891.65	0.156326	0.850916	1.62862	1.42902e-05	Tb427_110158100	FALSE	undetected	undetected
7641	Tb427-100162300	0	0.00990099	2.67037e-06	0.688065	4.69741	FALSE	8347.18	0.209664	0.805628	1.70231	1.54407e-05	Tb427_100162300	FALSE	undetected	undetected
7036	Tb427-100098500	2.80424e-06	0.00990099	2.69059e-06	0.400092	4.72936	FALSE	8528.07	0.21643	0.801047	1.62676	1.55391e-05	Tb427_100098500	FALSE	FALSE	undetected
8853	Tb427-110126600	5.91593e-06	0.00990099	2.76817e-06	0.555532	3.68105	FALSE	3551.03	0.0614023	0.939267	2.28183	1.59491e-05	Tb427_110126600	FALSE	undetected	undetected
4744	Tb427-080030900	1.92209e-05	0.00990099	2.78187e-06	0.926324	4.26329	FALSE	7843.13	0.190406	0.82055	1.57105	1.60185e-05	Tb427_080030900	FALSE	FALSE	undetected
2133	Tb427-030041400	6.44971e-07	0.00990099	2.89424e-06	0.947478	3.99571	FALSE	8251.56	0.205866	0.808508	1.86942	1.66063e-05	Tb427_030041400	FALSE	undetected	undetected
2482	Tb427-040021900	0	0.00990099	2.94252e-06	0.679722	3.96148	FALSE	5287.26	0.106481	0.896859	2.16869	1.68733e-05	Tb427_040021900	FALSE	undetected	undetected
4694	Tb427-080025900	1.34092e-06	0.00990099	2.96888e-06	0.56328	4.59122	FALSE	9222.87	0.246278	0.77356	1.59555	1.70044e-05	Tb427_080025900	FALSE	undetected	undetected
7805	Tb427-110013300	1.37777e-05	0.00990099	3.34335e-06	0.52849	4.12286	FALSE	7805.88	0.188337	0.825	1.53291	1.90032e-05	Tb427_110013300	FALSE	FALSE	undetected
351	Tb427-000348000:pseudogene	1.15375e-06	0.00990099	3.52679e-06	0.569903	4.3181	FALSE	1995.97	0.0290751	0.971335	4.30262	1.99872e-05	Tb427_000348000:pseudogene	FALSE	undetected	undetected
1412	Tb427-010020600	3.6154e-05	0.00990099	4.06327e-06	0.163738	3.68175	FALSE	7596.14	0.180746	0.830366	1.65263	2.29204e-05	Tb427_010020600	FALSE	undetected	undetected
6900	Tb427-100084300	1.88708e-07	0.00990099	4.08859e-06	0.631218	3.98517	FALSE	8824.71	0.228189	0.792016	1.77585	2.30498e-05	Tb427_100084300	FALSE	FALSE	undetected
8007	Tb427-110033700:pseudogene	0.000751747	0.00990099	4.87134e-06	0.300489	4.15115	FALSE	2896.58	0.0466809	0.953141	1.87274	2.72407e-05	Tb427_110033700:pseudogene	FALSE	undetected	undetected
924	Tb427-000749100:pseudogene	1.7453e-05	0.00990099	5.07493e-06	0.921516	3.34228	FALSE	1785.34	0.0252991	0.976309	5.29059	2.82975e-05	Tb427_000749100:pseudogene	FALSE	undetected	undetected
6907	Tb427-100085000	3.71107e-06	0.00990099	5.08517e-06	0.669049	3.48777	FALSE	7654.78	0.182442	0.830628	1.68316	2.83384e-05	Tb427_100085000	FALSE	undetected	undetected
3371	Tb427-060015100:pseudogene	9.03726e-05	0.00990099	5.31422e-06	0.451339	3.64121	FALSE	8401.82	0.211095	0.804712	1.51687	2.9496e-05	Tb427_060015100:pseudogene	FALSE	undetected	undetected
7834	Tb427-110016200	2.73062e-05	0.00990099	6.38165e-06	0.917489	4.41612	FALSE	7664.24	0.183308	0.82788	1.58264	3.50593e-05	Tb427_110016200	FALSE	FALSE	undetected
8968	Tb427-110138500	3.7497e-05	0.00990099	6.56431e-06	0.245032	4.66081	FALSE	6589.26	0.145658	0.86178	1.62083	3.59609e-05	Tb427_110138500	FALSE	undetected	undetected
4093	Tb427-070042300	1.96704e-05	0.00990099	6.77845e-06	0.721167	4.39238	FALSE	8990.09	0.235762	0.782723	1.60544	3.70502e-05	Tb427_070042300	FALSE	undetected	undetected
8508	Tb427-110084300	1.62515e-06	0.00990099	6.96727e-06	0.668904	3.53588	FALSE	6944.2	0.157316	0.852749	1.68073	3.80179e-05	Tb427_110084300	FALSE	undetected	undetected
8303	Tb427-110063800	3.85415e-06	0.00990099	8.08737e-06	0.548252	4.23955	FALSE	8229.26	0.204825	0.809424	1.64663	4.38337e-05	Tb427_110063800	FALSE	TRUE	undetected
3598	Tb427-060040500	9.49167e-06	0.00990099	8.43801e-06	0.42678	4.0802	FALSE	9730.72	0.266848	0.760733	1.51026	4.54798e-05	Tb427_060040500	FALSE	undetected	undetected
2893	Tb427-050012300	8.40107e-06	0.00990099	9.3753e-06	0.752729	1.00007	FALSE	6016.01	0.127897	0.875654	1.61952	5.0169e-05	Tb427_050012300	FALSE	FALSE	undetected
2626	Tb427-040036700	9.31097e-07	0.00990099	9.68543e-06	0.0708822	4.11485	FALSE	6162.65	0.132182	0.874607	1.62532	5.17143e-05	Tb427_040036700	FALSE	FALSE	undetected
6206	Tb427-100012200	4.1258e-05	0.00990099	9.83975e-06	0.977313	3.76869	FALSE	6992.5	0.158693	0.852487	1.66655	5.24516e-05	Tb427_100012200	FALSE	FALSE	undetected
4541	Tb427-080008100	3.82775e-06	0.00990099	1.04781e-05	0.866217	4.32392	FALSE	5946.22	0.125616	0.879581	1.80315	5.55791e-05	Tb427_080008100	FALSE	FALSE	undetected
6443	Tb427-100036900	3.94091e-05	0.00990099	1.05504e-05	0.127895	3.83715	FALSE	6512.04	0.143485	0.86322	1.80491	5.59319e-05	Tb427_100036900	FALSE	undetected	undetected
1673	Tb427-020020600	9.83488e-05	0.00990099	1.1941e-05	0.148286	4.39102	FALSE	6829.51	0.153044	0.857068	1.56711	6.27211e-05	Tb427_020020600	FALSE	FALSE	undetected
318	Tb427-000288500:pseudogene	0.000206977	0.00990099	1.20012e-05	0.891557	3.40532	FALSE	2142.51	0.0315493	0.96911	2.64273	6.29691e-05	Tb427_000288500:pseudogene	FALSE	undetected	undetected
5276	Tb427-080085600	1.98372e-06	0.00990099	1.23815e-05	0.536943	1.00087	FALSE	7862.79	0.190919	0.820681	1.53396	6.49293e-05	Tb427_080085600	FALSE	FALSE	undetected
4039	Tb427-070036900	1.26063e-05	0.00990099	1.2681e-05	0.896675	3.6125	FALSE	5766.37	0.119927	0.88534	1.65256	6.6428e-05	Tb427_070036900	FALSE	FALSE	undetected
9274	Tb427-110169600	8.08344e-07	0.00990099	1.30701e-05	0.0844451	1.00014	FALSE	7611.41	0.182211	0.826178	1.59395	6.82817e-05	Tb427_110169600	FALSE	FALSE	undetected
8291	Tb427-110062600	1.40556e-05	0.00990099	1.34082e-05	0.458814	3.74778	FALSE	7981.66	0.19539	0.816885	1.63784	6.99723e-05	Tb427_110062600	FALSE	TRUE	undetected
3246	Tb427-050048500	0.000139947	0.00990099	1.34037e-05	0.167281	3.66968	FALSE	445.119	0.0048195	0.995026	61.33	6.99723e-05	Tb427_050048500	FALSE	undetected	undetected
9175	Tb427-110159700	2.12051e-05	0.00990099	1.42813e-05	0.730674	4.57511	FALSE	6257.64	0.135324	0.870681	1.88618	7.41296e-05	Tb427_110159700	FALSE	undetected	undetected
6057	Tb427-090085000	0.000287478	0.00990099	1.50846e-05	0.484814	3.99365	FALSE	8840.36	0.22924	0.788613	1.5752	7.78823e-05	Tb427_090085000	FALSE	FALSE	undetected
3959	Tb427-070027100	7.41682e-05	0.00990099	1.5376e-05	0.58999	4.28061	FALSE	8618.05	0.219904	0.796466	1.50709	7.92179e-05	Tb427_070027100	FALSE	FALSE	undetected
9108	Tb427-110153000	0.000988439	0.00990099	1.87035e-05	0.73947	3.61718	FALSE	6830.63	0.153752	0.853927	1.51902	9.50473e-05	Tb427_110153000	FALSE	undetected	undetected
7734	Tb427-110006100	4.63752e-05	0.00990099	1.87836e-05	0.93921	4.52715	FALSE	4846.42	0.0935158	0.910602	2.18459	9.53543e-05	Tb427_110006100	FALSE	undetected	undetected
2370	Tb427-040010700	3.25273e-07	0.00990099	1.97488e-05	0.71483	2.81422	FALSE	8049.96	0.198579	0.813613	1.57971	9.97842e-05	Tb427_040010700	FALSE	undetected	undetected
633	Tb427-000654900:pseudogene	6.03487e-05	0.00990099	2.17752e-05	0.0904242	4.04542	FALSE	5396.12	0.108992	0.895288	1.68195	0.000109452	Tb427_000654900:pseudogene	FALSE	undetected	undetected
8188	Tb427-110052200	2.46435e-05	0.00990099	2.53439e-05	0.0682173	3.51697	FALSE	6730.39	0.150364	0.857984	1.97367	0.000126212	Tb427_110052200	FALSE	undetected	undetected
5593	Tb427-090035600	4.14687e-05	0.00990099	2.59546e-05	0.894841	4.46006	FALSE	4888.01	0.0945711	0.909948	1.92787	0.00012912	Tb427_090035600	FALSE	undetected	undetected
1475	Tb427-010027800	7.82098e-06	0.00990099	2.7032e-05	0.788082	3.67697	FALSE	2009.56	0.0293525	0.970681	6.95339	0.000133998	Tb427_010027800	FALSE	TRUE	undetected
7597	Tb427-100157200	6.17623e-06	0.00990099	2.86915e-05	0.728762	4.8073	FALSE	5812.39	0.12102	0.886387	2.07505	0.000141213	Tb427_100157200	TRUE	undetected	undetected
5385	Tb427-090013500	0.000572074	0.00990099	2.87343e-05	0.572981	4.71493	FALSE	6815.37	0.15268	0.856545	1.74779	0.000141352	Tb427_090013500	FALSE	undetected	undetected
2941	Tb427-050017100	0.000263543	0.00990099	2.9245e-05	0.666683	3.76283	FALSE	6780.22	0.151564	0.857853	1.55072	0.000143573	Tb427_050017100	FALSE	FALSE	undetected
5249	Tb427-080082400	4.25066e-06	0.00990099	3.24442e-05	0.963652	3.00992	FALSE	5497.73	0.112268	0.891099	1.66645	0.000157998	Tb427_080082400	FALSE	undetected	undetected
9061	Tb427-110148100	0.000123961	0.00990099	3.32566e-05	0.621644	4.01218	FALSE	3520.85	0.0603091	0.941623	1.87342	0.000161711	Tb427_110148100	FALSE	undetected	undetected
1217	Tb427-000829500:pseudogene	5.46704e-05	0.00990099	3.38001e-05	0.650592	3.54918	FALSE	2407.62	0.036728	0.963874	3.51947	0.000164106	Tb427_000829500:pseudogene	FALSE	undetected	undetected
2948	Tb427-050017800	2.16777e-06	0.00990099	3.39781e-05	0.352942	1.00018	FALSE	7849.66	0.190251	0.821204	1.53204	0.000164806	Tb427_050017800	FALSE	FALSE	undetected
1046	Tb427-000783200:pseudogene	0.000108225	0.00990099	3.67322e-05	0.645646	3.58475	FALSE	997.432	0.0124602	0.988351	6.1964	0.000177188	Tb427_000783200:pseudogene	FALSE	undetected	undetected
7567	Tb427-100154200	7.06133e-06	0.00990099	3.89328e-05	0.912482	1.84621	FALSE	7294.69	0.170873	0.835995	1.59253	0.000187245	Tb427_100154200	FALSE	FALSE	undetected
8784	Tb427-110119700	1.84285e-05	0.00990099	3.96061e-05	0.565558	3.90261	FALSE	5124.42	0.101386	0.901963	1.74195	0.000190294	Tb427_110119700	FALSE	undetected	undetected
3519	Tb427-060032600	9.85173e-07	0.00990099	4.09977e-05	0.364562	4.56602	FALSE	4842.7	0.09395	0.908377	1.92085	0.00019659	Tb427_060032600	FALSE	undetected	undetected
4675	Tb427-080024000	0.000260516	0.00990099	4.21555e-05	0.30278	4.39659	FALSE	7150.34	0.16431	0.845681	1.69939	0.000201843	Tb427_080024000	FALSE	undetected	undetected
9101	Tb427-110152300	0.000611579	0.00990099	4.58939e-05	0.475127	3.51629	FALSE	6587.08	0.145721	0.860602	1.50435	0.000218497	Tb427_110152300	FALSE	FALSE	undetected
1072	Tb427-000790800	4.23651e-05	0.00990099	4.59045e-05	0.125133	3.33795	FALSE	1628.88	0.0225268	0.978796	3.68731	0.000218497	Tb427_000790800	FALSE	undetected	undetected
2010	Tb427-030027600	0.000181756	0.00990099	4.6158e-05	0.0420277	4.8012	FALSE	7060.76	0.161924	0.845942	1.66188	0.000219596	Tb427_030027600	FALSE	FALSE	undetected
5571	Tb427-090033300	3.48379e-05	0.00990099	4.87038e-05	0.596009	1.72022	FALSE	1073.33	0.013516	0.987042	6.81602	0.000230914	Tb427_090033300	TRUE	undetected	undetected
9269	Tb427-110169100	1.488e-05	0.00990099	4.95145e-05	0.363957	4.39865	FALSE	3565.38	0.0616111	0.93966	2.92352	0.000234528	Tb427_110169100	FALSE	undetected	undetected
6283	Tb427-100020000	0.000191569	0.00990099	4.98892e-05	0.411704	3.31329	FALSE	5956.44	0.125811	0.878796	1.60415	0.000236188	Tb427_100020000	FALSE	undetected	undetected
2590	Tb427-040032700	2.36883e-05	0.00990099	5.22805e-05	0.952244	2.28236	FALSE	7214.88	0.167312	0.840969	1.51912	0.000246785	Tb427_040032700	FALSE	undetected	undetected
3587	Tb427-060039400	0.000205095	0.00990099	5.31814e-05	0.920208	3.76166	FALSE	7976.53	0.194901	0.817801	1.57068	0.000250672	Tb427_060039400	FALSE	FALSE	undetected
4532	Tb427-080007200	0.000499606	0.00990099	5.57466e-05	0.413375	4.36923	FALSE	6486.11	0.14164	0.867539	1.81265	0.000261238	Tb427_080007200	FALSE	FALSE	undetected
1441	Tb427-010023600	3.51292e-05	0.00990099	5.81112e-05	0.576948	3.68697	FALSE	5346.38	0.107809	0.895288	2.02905	0.0002714	Tb427_010023600	FALSE	FALSE	undetected
4233	Tb427-070056300	0.00204561	0.00990099	5.99613e-05	0.754206	4.89614	FALSE	4425.74	0.082304	0.920288	1.92101	0.000278832	Tb427_070056300	FALSE	undetected	undetected
4819	Tb427-080038500	0.000348435	0.00990099	6.14923e-05	0.963234	3.87246	FALSE	6219.77	0.133769	0.872513	1.61467	0.000285814	Tb427_080038500	FALSE	undetected	undetected
7974	Tb427-110030400	4.64084e-06	0.00990099	6.78287e-05	0.854013	4.07296	FALSE	7519.01	0.177734	0.834162	1.79122	0.000312567	Tb427_110030400	FALSE	FALSE	undetected
3584	Tb427-060039100	0.000536904	0.00990099	6.86767e-05	0.930216	4.13183	FALSE	8639.69	0.219473	0.800131	1.61369	0.000316024	Tb427_060039100	FALSE	FALSE	undetected
1059	Tb427-000785000:pseudogene	0.000272884	0.00990099	6.9517e-05	0.520327	4.73398	FALSE	5121.81	0.101014	0.903272	1.82686	0.000319204	Tb427_000785000:pseudogene	FALSE	undetected	undetected
1602	Tb427-020013200	0.00113346	0.00990099	7.05907e-05	0.640928	3.89672	FALSE	7232.77	0.166763	0.844241	1.58511	0.000323755	Tb427_020013200	FALSE	undetected	undetected
4178	Tb427-070050800	0.000157238	0.00990099	7.38862e-05	0.957699	4.61397	FALSE	4471.4	0.0836194	0.91911	1.67792	0.000337114	Tb427_070050800	FALSE	undetected	undetected
5145	Tb427-080072000	0.000612761	0.00990099	7.78041e-05	0.4595	3.52895	FALSE	5741.82	0.118621	0.887565	1.65667	0.000353161	Tb427_080072000	FALSE	undetected	undetected
2047	Tb427-030031300	0.000284136	0.00990099	8.37587e-05	0.0253672	3.32831	FALSE	5533.3	0.11316	0.889921	1.54678	0.000377362	Tb427_030031300	FALSE	undetected	undetected
2166	Tb427-030044900	3.47021e-05	0.00990099	8.75161e-05	0.938283	4.26419	FALSE	6202.75	0.13304	0.874346	1.86428	0.000393376	Tb427_030044900	FALSE	undetected	undetected
1696	Tb427-020022900	0.000116244	0.00990099	8.78925e-05	0.660539	1.91209	FALSE	5966.01	0.125236	0.882592	1.60681	0.00039473	Tb427_020022900	FALSE	undetected	undetected
4137	Tb427-070046700	0.000162165	0.00990099	0.000101056	0.62392	4.31077	FALSE	7354.53	0.172027	0.837304	1.50165	0.000449031	Tb427_070046700	FALSE	undetected	undetected
6016	Tb427-090080900	6.26461e-05	0.00990099	0.000101138	0.373009	4.76296	FALSE	8722.52	0.225135	0.789921	1.69592	0.000449186	Tb427_090080900	FALSE	undetected	undetected
4340	Tb427-070067200	6.01563e-06	0.00990099	0.000106519	0.647558	1.00035	FALSE	7173.35	0.165465	0.843979	1.54271	0.000470715	Tb427_070067200	FALSE	undetected	undetected
7661	Tb427-100164300	0.00026375	0.00990099	0.000123587	0.952277	3.44561	FALSE	5089.8	0.100263	0.90301	1.70196	0.000540228	Tb427_100164300	FALSE	FALSE	undetected
1129	Tb427-000805000:pseudogene	0.000128098	0.00990099	0.00012765	0.156518	3.10141	FALSE	4001.45	0.0715354	0.932853	1.88883	0.000557485	Tb427_000805000:pseudogene	FALSE	undetected	undetected
7128	Tb427-100107700	4.82334e-05	0.00990099	0.000133684	0.432491	3.66498	FALSE	5811.48	0.120876	0.885995	1.69157	0.00058158	Tb427_100107700	FALSE	undetected	undetected
8212	Tb427-110054700	6.9714e-05	0.00990099	0.000138446	0.430531	1.40443	FALSE	6608.52	0.14661	0.859555	1.54364	0.000600303	Tb427_110054700	FALSE	FALSE	undetected
2732	Tb427-040048100	4.60126e-05	0.00990099	0.000138875	0.287564	3.9017	FALSE	5791.71	0.120574	0.885079	1.77987	0.000601894	Tb427_040048100	FALSE	undetected	undetected
826	Tb427-000714100	8.67441e-05	0.00990099	0.00014052	0.59134	1.74189	FALSE	4593.71	0.0871764	0.913874	1.74917	0.000607421	Tb427_000714100	FALSE	undetected	undetected
4414	Tb427-070074900	0.000143399	0.00990099	0.00014397	0.161401	4.73844	FALSE	5648.17	0.115634	0.892147	2.07581	0.000620921	Tb427_070074900	FALSE	FALSE	undetected
6840	Tb427-100078200	0.000515651	0.00990099	0.000157357	0.505093	3.93962	FALSE	5472.74	0.111152	0.893194	1.92714	0.000673732	Tb427_100078200	FALSE	undetected	undetected
7073	Tb427-100102200	0.000324844	0.00990099	0.00016309	0.022857	3.48941	FALSE	1168.85	0.0147789	0.98534	4.58727	0.000694117	Tb427_100102200	FALSE	undetected	undetected
9354	Tb427-110177800	2.66982e-06	0.00990099	0.000169288	0.990247	1.00008	FALSE	6195.78	0.133273	0.871859	1.64755	0.000716406	Tb427_110177800	FALSE	FALSE	undetected
7631	Tb427-100161300	0.00028947	0.00990099	0.000170989	0.16338	3.37378	FALSE	5208.46	0.10377	0.899084	1.64261	0.000723287	Tb427_100161300	FALSE	undetected	undetected
5153	Tb427-080072800	0.0012079	0.00990099	0.000185077	0.519992	4.68322	FALSE	6395.53	0.139491	0.86623	1.58997	0.000774432	Tb427_080072800	FALSE	FALSE	undetected
879	Tb427-000737100	0.00037624	0.00990099	0.000188253	0.636902	3.31322	FALSE	1192.58	0.0151517	0.984686	4.28866	0.000786362	Tb427_000737100	FALSE	undetected	undetected
769	Tb427-000700800	0.00045984	0.00990099	0.000191446	0.0913077	3.84713	FALSE	1395.32	0.0184155	0.981806	2.89212	0.000798442	Tb427_000700800	FALSE	undetected	undetected
2324	Tb427-040006100	0.0397522	0.00990099	0.000200535	0.214961	4.69875	FALSE	9549.36	0.258674	0.765707	1.54137	0.000831926	Tb427_040006100	FALSE	undetected	undetected
5251	Tb427-080082800	0.00150018	0.00990099	0.000202794	0.969072	2.78622	FALSE	5404.23	0.109311	0.893717	1.58175	0.000840939	Tb427_080082800	FALSE	undetected	undetected
6432	Tb427-100035800	0.000160129	0.00990099	0.00020311	0.701796	1.49173	FALSE	6440.87	0.140891	0.865314	1.53503	0.00084189	Tb427_100035800	FALSE	undetected	undetected
6002	Tb427-090079500	3.97648e-05	0.00990099	0.000207687	0.406281	4.55744	FALSE	5857.9	0.122877	0.881675	1.92034	0.000858658	Tb427_090079500	FALSE	undetected	undetected
6920	Tb427-100086300	0.00435834	0.00990099	0.000209175	0.843653	4.19412	FALSE	1213.34	0.0154958	0.983639	2.69365	0.000864074	Tb427_100086300	FALSE	FALSE	undetected
4485	Tb427-070082600	0.00659009	0.00990099	0.000213659	0.348617	4.50089	FALSE	4608.28	0.0868245	0.917147	1.91061	0.00088072	Tb427_070082600	FALSE	undetected	undetected
5750	Tb427-090051800	0.000347171	0.00990099	0.000221488	0.880342	4.17317	FALSE	6671.96	0.148744	0.857853	1.67259	0.000911053	Tb427_090051800	FALSE	undetected	undetected
7069	Tb427-100101800	0.00172956	0.00990099	0.000222435	0.353171	3.60199	FALSE	3507.12	0.059835	0.942539	1.97762	0.000914172	Tb427_100101800	FALSE	undetected	undetected
7967	Tb427-110029700	5.88594e-05	0.00990099	0.000244295	0.780685	3.95763	FALSE	7048.23	0.160526	0.850262	1.57041	0.000995568	Tb427_110029700	FALSE	undetected	undetected
107	Tb427-000107400	0.000240442	0.00990099	0.000263959	0.843972	3.17262	FALSE	2354	0.0356621	0.966361	2.51581	0.00106807	Tb427_000107400	FALSE	undetected	undetected
4624	Tb427-080018500	0.000245893	0.00990099	0.000285841	0.28242	3.42092	FALSE	1983.76	0.0287049	0.97055	2.18814	0.00114989	Tb427_080018500	FALSE	undetected	undetected
8391	Tb427-110072600	0.00019834	0.00990099	0.000286268	0.575562	4.19077	FALSE	5119.74	0.101078	0.902356	1.69167	0.00115113	Tb427_110072600	FALSE	undetected	undetected
1480	Tb427-010028300	0.000127399	0.00990099	0.000296561	0.744384	3.45674	FALSE	5572.15	0.113874	0.891754	1.84468	0.00118759	Tb427_010028300	FALSE	undetected	undetected
6362	Tb427-100028300	0.000736691	0.00990099	0.00029819	0.762929	4.44754	FALSE	6614.23	0.146529	0.860209	1.72853	0.00119362	Tb427_100028300	FALSE	undetected	undetected
6937	Tb427-100088000	0.0026218	0.00990099	0.000305438	0.327265	4.07199	FALSE	4909.16	0.0950903	0.907984	1.56323	0.00122062	Tb427_100088000	FALSE	undetected	undetected
8976	Tb427-110139300	2.72513e-05	0.00990099	0.000310601	0.85665	1.54386	FALSE	6540.58	0.144906	0.859424	1.60742	0.0012387	Tb427_110139300	FALSE	FALSE	undetected
8289	Tb427-110062400	0.000895471	0.00990099	0.000314291	0.468342	3.99819	FALSE	7031.03	0.160218	0.849346	1.57834	0.00125187	Tb427_110062400	FALSE	FALSE	undetected
7697	Tb427-100169100	0.00144512	0.00990099	0.00032687	0.827629	3.28697	FALSE	6089	0.12866	0.880628	1.58048	0.00129877	Tb427_100169100	FALSE	undetected	undetected
6080	Tb427-090087400	1.67061e-06	0.00990099	0.000365333	0.51888	1.00022	FALSE	6380.59	0.139554	0.865052	1.63517	0.00143687	Tb427_090087400	FALSE	FALSE	undetected
1732	Tb427-020026600	0.000984078	0.00990099	0.000366863	0.770934	4.51136	FALSE	7796.09	0.187882	0.823953	1.6193	0.0014423	Tb427_020026600	FALSE	undetected	undetected
7383	Tb427-100135000	0.000167066	0.00990099	0.000371815	0.484133	3.69181	FALSE	6397.69	0.138605	0.871073	1.52773	0.0014594	Tb427_100135000	FALSE	undetected	undetected
8577	Tb427-110091200	9.17767e-06	0.00990099	0.000378087	0.769325	1.00014	FALSE	4731.16	0.0905428	0.91178	1.76508	0.00148222	Tb427_110091200	FALSE	FALSE	undetected
2704	Tb427-040044700	0.0122216	0.00990099	0.000384145	0.495356	4.74024	FALSE	3589.27	0.0616905	0.940707	1.91306	0.00150414	Tb427_040044700	FALSE	undetected	undetected
7044	Tb427-100099300	0.000309832	0.00990099	0.000389058	0.693133	4.51779	FALSE	5941.97	0.124939	0.881152	2.01892	0.00152153	Tb427_100099300	FALSE	undetected	undetected
4525	Tb427-080006500	0.000366484	0.00990099	0.000402492	0.287449	4.04241	FALSE	5780.41	0.119933	0.886126	1.62904	0.00156838	Tb427_080006500	FALSE	FALSE	undetected
5067	Tb427-080064100	0.000487092	0.00990099	0.000408572	0.402647	3.78555	FALSE	6662.7	0.147949	0.859817	1.73077	0.00159015	Tb427_080064100	FALSE	FALSE	undetected
3937	Tb427-070024900	0.000775126	0.00990099	0.000430522	0.364379	3.32944	FALSE	4182.32	0.076072	0.926309	1.84991	0.00166821	Tb427_070024900	FALSE	undetected	undetected
2305	Tb427-030059500	0.00329622	0.00990099	0.000487974	0.45845	4.63399	FALSE	8549.22	0.215681	0.803534	1.52413	0.00187285	Tb427_030059500	FALSE	FALSE	undetected
761	Tb427-000698200	0.0014509	0.00990099	0.000510611	0.959562	3.48788	FALSE	836.505	0.00985483	0.990445	5.12149	0.0019522	Tb427_000698200	FALSE	undetected	undetected
6974	Tb427-100092300	3.1089e-06	0.00990099	0.000516874	0.542078	1.00025	FALSE	6915.55	0.156747	0.851702	1.58197	0.00197439	Tb427_100092300	FALSE	FALSE	undetected
1536	Tb427-020006300	0.000129696	0.00990099	0.000530423	0.615228	1.00015	FALSE	6154.3	0.131492	0.874869	1.50544	0.00202216	Tb427_020006300	FALSE	undetected	undetected
7197	Tb427-100115800	0.000580364	0.00990099	0.000532042	0.672743	4.191	FALSE	2960.18	0.0479768	0.952356	2.41189	0.00202674	Tb427_100115800	FALSE	undetected	undetected
4346	Tb427-070067800	0.000251902	0.00990099	0.000540403	0.46492	4.2477	FALSE	6224.97	0.133392	0.875	1.6823	0.00205374	Tb427_070067800	FALSE	FALSE	undetected
4838	Tb427-080040500:pseudogene	0.000465044	0.00990099	0.000577982	0.996692	4.08654	FALSE	1541.52	0.0208413	0.979712	3.03266	0.00218712	Tb427_080040500:pseudogene	FALSE	undetected	undetected
834	Tb427-000720800:pseudogene	0.000992247	0.00990099	0.000593015	0.792188	3.3519	FALSE	1046.43	0.0130395	0.987696	4.24098	0.00223876	Tb427_000720800:pseudogene	FALSE	undetected	undetected
5765	Tb427-090053300	0.00296394	0.00990099	0.000683643	0.149059	4.40112	FALSE	6155.84	0.131615	0.874476	1.50826	0.00253839	Tb427_090053300	FALSE	undetected	undetected
8719	Tb427-110106700	0.00134728	0.00990099	0.000719369	0.166402	4.26227	FALSE	6810.98	0.152814	0.855105	1.52844	0.00266034	Tb427_110106700	FALSE	FALSE	undetected
563	Tb427-000630600:pseudogene	0.00797438	0.00990099	0.000726982	0.151163	4.66272	FALSE	845.524	0.00997393	0.990183	16.3783	0.00268388	Tb427_000630600:pseudogene	FALSE	undetected	undetected
1048	Tb427-000783500:pseudogene	0.000567451	0.00990099	0.000734154	0.365688	1.01682	FALSE	1260.6	0.0161669	0.984031	3.49105	0.00270354	Tb427_000783500:pseudogene	FALSE	undetected	undetected
8401	Tb427-110073600	0.000247888	0.00990099	0.000740484	0.0552241	3.06479	FALSE	6310.42	0.136351	0.87055	1.56276	0.00272438	Tb427_110073600	FALSE	FALSE	undetected
9365	Tb427-110178900	0.0016994	0.00990099	0.0007457	0.240854	3.12551	FALSE	5674.34	0.117289	0.886126	1.50847	0.00274072	Tb427_110178900	FALSE	FALSE	undetected
9329	Tb427-110175100	0.000210156	0.00990099	0.000745771	0.284049	4.68415	FALSE	5204.75	0.103198	0.901571	1.69114	0.00274072	Tb427_110175100	TRUE	undetected	undetected
3200	Tb427-050043900	0.00366753	0.00990099	0.000775132	0.116566	3.95839	FALSE	4166.97	0.0756366	0.92644	1.70221	0.0028388	Tb427_050043900	FALSE	undetected	undetected
8178	Tb427-110051200	1.45437e-06	0.00990099	0.000825348	0.336574	1.00021	FALSE	7020	0.160826	0.846335	1.58388	0.0030092	Tb427_110051200	FALSE	FALSE	undetected
3173	Tb427-050041200	0.000821758	0.00990099	0.000832342	0.581636	3.90187	FALSE	8189.62	0.203566	0.808377	1.50122	0.00303221	Tb427_050041200	FALSE	undetected	undetected
6579	Tb427-100050600	0.000460647	0.00990099	0.000834779	0.585519	3.21329	FALSE	7321.6	0.16995	0.842277	1.61552	0.00303901	Tb427_100050600	FALSE	undetected	undetected
9213	Tb427-110163500	0.00336249	0.00990099	0.000836759	0.859396	4.61539	FALSE	8385.7	0.20948	0.808639	1.53673	0.00304507	Tb427_110163500	FALSE	undetected	undetected
4228	Tb427-070055800	0.00105022	0.00990099	0.000868502	0.395637	3.40846	FALSE	4659.41	0.0883206	0.915052	1.6807	0.00313937	Tb427_070055800	FALSE	undetected	undetected
780	Tb427-000702800	0.00279115	0.00990099	0.000871211	0.840305	3.78007	FALSE	1750.97	0.0243432	0.97644	2.82961	0.00314681	Tb427_000702800	FALSE	undetected	undetected
5626	Tb427-090039100	0.00636794	0.00990099	0.000890542	0.795665	3.87637	FALSE	5445.36	0.109882	0.895681	1.5185	0.00320946	Tb427_090039100	FALSE	FALSE	undetected
6205	Tb427-100012100	0.00387015	0.00990099	0.000899574	0.0721985	4.83128	FALSE	4302.25	0.078934	0.924869	2.33973	0.003236	Tb427_100012100	FALSE	FALSE	undetected
8828	Tb427-110124100	0.00361375	0.00990099	0.000903504	0.562625	3.25028	FALSE	6180.53	0.13173	0.876571	1.50804	0.00324772	Tb427_110124100	FALSE	undetected	undetected
6739	Tb427-100066900	0.000467901	0.00990099	0.000960822	0.810349	2.98669	FALSE	1893.72	0.0269927	0.972644	2.63718	0.00343212	Tb427_100066900	FALSE	undetected	undetected
5520	Tb427-090028200	0.00533729	0.00990099	0.000984592	0.848824	3.2775	FALSE	5758.39	0.119476	0.885209	1.51304	0.00350539	Tb427_090028200	FALSE	FALSE	undetected
6130	Tb427-090093000	0.0222111	0.00990099	0.000989063	0.403984	4.35262	FALSE	6187.79	0.132379	0.874084	1.56763	0.00351873	Tb427_090093000	FALSE	undetected	undetected
5087	Tb427-080066100	0.00938238	0.00990099	0.00102627	0.0876066	4.37601	FALSE	7978.65	0.194645	0.818063	1.53035	0.00363642	Tb427_080066100	FALSE	undetected	undetected
2712	Tb427-040046100	0.00407854	0.00990099	0.00110261	0.777636	4.47277	FALSE	7215.82	0.166395	0.84411	1.61987	0.00387206	Tb427_040046100	FALSE	FALSE	undetected
8215	Tb427-110055000	0.0008826	0.00990099	0.00110431	0.57421	4.77296	FALSE	4921.24	0.0956406	0.906937	1.83743	0.00387469	Tb427_110055000	FALSE	undetected	undetected
9393	Tb427-110181800	0.00313517	0.00990099	0.00113927	0.251321	4.35961	FALSE	7845.57	0.189257	0.823429	1.55672	0.00398006	Tb427_110181800	FALSE	FALSE	undetected
5537	Tb427-090029900	0.00167075	0.00990099	0.00117918	0.174788	3.15184	FALSE	8661.89	0.221538	0.795419	1.51241	0.00410912	Tb427_090029900	FALSE	undetected	undetected
782	Tb427-000703500:pseudogene	0.0220748	0.00990099	0.00120237	0.483175	4.73967	FALSE	4840.3	0.0929361	0.911126	1.77566	0.00417642	Tb427_000703500:pseudogene	FALSE	undetected	undetected
640	Tb427-000656100:pseudogene	0.00120831	0.00990099	0.00130359	0.801123	3.22892	FALSE	2782.01	0.0440658	0.957461	2.11389	0.00448617	Tb427_000656100:pseudogene	FALSE	undetected	undetected
494	Tb427-000524500	0.0022106	0.00990099	0.00132135	0.958487	4.71218	FALSE	1515.4	0.0210276	0.981545	5.38868	0.00453582	Tb427_000524500	FALSE	undetected	undetected
1070	Tb427-000790600	0.00573614	0.00990099	0.00132978	0.43219	3.16856	FALSE	1230.54	0.0156669	0.984686	3.05114	0.00455852	Tb427_000790600	FALSE	undetected	undetected
6886	Tb427-100082900	0.000815841	0.00990099	0.00134642	0.858881	3.10914	FALSE	2319.04	0.0348457	0.965445	1.95767	0.00461392	Tb427_100082900	FALSE	undetected	undetected
9115	Tb427-110153700	0.0123685	0.00990099	0.00134853	0.463093	4.73859	FALSE	8213.3	0.203522	0.810602	1.55426	0.00461951	Tb427_110153700	FALSE	FALSE	undetected
3931	Tb427-070024100	0.00179084	0.00990099	0.00136494	0.650025	3.45134	FALSE	2407.8	0.0365436	0.964791	2.35883	0.00466912	Tb427_070024100	FALSE	undetected	undetected
4760	Tb427-080032500	0.00584005	0.00990099	0.00140256	0.71061	2.86393	FALSE	2225.54	0.0330562	0.966623	1.97459	0.00478597	Tb427_080032500	FALSE	undetected	undetected
3944	Tb427-070025600	0.000684052	0.00990099	0.00140677	0.0778582	3.67072	FALSE	2853.89	0.045733	0.954581	2.4076	0.0047973	Tb427_070025600	FALSE	undetected	undetected
1294	Tb427-010007400	0.000144205	0.00990099	0.00144162	0.708027	1.00411	FALSE	3369.88	0.0568507	0.943979	1.84916	0.00490374	Tb427_010007400	FALSE	undetected	undetected
9646	Tb427-000790300:pseudogene	0.14122	0.00990099	0.00146153	0.71409	2.97812	FALSE	80.5014	0.000613951	0.999346	62.5411	0.00496273	Tb427_000790300:pseudogene	FALSE	undetected	undetected
2365	Tb427-040010200	1.29776e-05	0.00990099	0.00147053	0.229491	1.00019	FALSE	4077.18	0.073821	0.927356	1.84984	0.00498459	Tb427_040010200	FALSE	undetected	undetected
1698	Tb427-020023100	6.10014e-05	0.00990099	0.00147951	0.497906	1.00016	FALSE	6041.9	0.128906	0.873822	1.54083	0.00500668	Tb427_020023100	FALSE	FALSE	undetected
4191	Tb427-070052100	0.00351089	0.00990099	0.00151997	0.695474	3.6589	FALSE	4131.89	0.0747621	0.927356	1.63825	0.00512171	Tb427_070052100	FALSE	undetected	undetected
1853	Tb427-030010600	0.00385211	0.00990099	0.00152951	0.477271	4.06771	FALSE	6104.79	0.130096	0.875131	1.56338	0.00514848	Tb427_030010600	FALSE	FALSE	undetected
787	Tb427-000704300:pseudogene	0.00311853	0.00990099	0.00155928	0.903006	4.26213	FALSE	6114.41	0.130176	0.87644	1.70237	0.00524323	Tb427_000704300:pseudogene	FALSE	undetected	undetected
792	Tb427-000704900:pseudogene	0.00757272	0.00990099	0.00157806	0.32696	3.46995	FALSE	2887.01	0.0463986	0.953141	2.06661	0.00529903	Tb427_000704900:pseudogene	FALSE	undetected	undetected
4206	Tb427-070053600	1.97061e-05	0.00990099	0.00158869	0.969366	1.006	FALSE	3826.32	0.0674386	0.934555	1.894	0.00532733	Tb427_070053600	FALSE	undetected	undetected
2225	Tb427-030051500	0.000635612	0.00990099	0.00161616	0.214167	1.0038	FALSE	3412.68	0.0577287	0.943455	1.73452	0.00540262	Tb427_030051500	FALSE	FALSE	undetected
8175	Tb427-110050900	0.00703125	0.00990099	0.00182628	0.62451	4.20059	FALSE	5522.79	0.112534	0.89123	1.53739	0.00603425	Tb427_110050900	TRUE	undetected	undetected
660	Tb427-000660500	0.208366	0.019802	0.00182942	0.958434	4.31011	FALSE	84.6947	0.000729579	0.999215	2.69908e+07	0.0060405	Tb427_000660500	FALSE	undetected	undetected
7852	Tb427-110018000	0.0135549	0.00990099	0.00186406	0.359789	4.66604	FALSE	5989.69	0.126322	0.879319	1.50096	0.00614232	Tb427_110018000	FALSE	undetected	undetected
4358	Tb427-070069000	0.0276803	0.00990099	0.00187564	0.470262	4.08706	FALSE	5491.31	0.111343	0.893063	1.55518	0.00617628	Tb427_070069000	FALSE	undetected	undetected
3144	Tb427-050038300	0.00479433	0.019802	0.00192007	0.223762	3.20136	FALSE	2319.93	0.0348398	0.965052	2.08674	0.00629904	Tb427_050038300	FALSE	undetected	undetected
1366	Tb427-010014600	0.00544611	0.00990099	0.00193316	0.398357	3.26764	FALSE	4741.86	0.0906431	0.911257	1.58507	0.00633771	Tb427_010014600	FALSE	undetected	undetected
9233	Tb427-110165500	0.00199205	0.00990099	0.00195484	0.764384	4.53764	FALSE	5379.76	0.108004	0.897251	1.65624	0.00639663	Tb427_110165500	FALSE	undetected	undetected
3615	Tb427-060042200	0.000760071	0.00990099	0.00207051	0.67913	4.50332	FALSE	5659.38	0.116566	0.887696	1.70778	0.00674237	Tb427_060042200	FALSE	undetected	undetected
3564	Tb427-060037100	0.000596918	0.00990099	0.00207545	0.0853113	2.34494	FALSE	5005.88	0.0975647	0.906283	1.63102	0.00675394	Tb427_060037100	FALSE	undetected	undetected
9228	Tb427-110165000	0.00131944	0.00990099	0.00210419	0.221749	2.04429	FALSE	4559.87	0.0857652	0.916623	1.57078	0.00682911	Tb427_110165000	FALSE	undetected	undetected
6014	Tb427-090080700	0.00103095	0.00990099	0.00210391	0.861435	1.00194	FALSE	3484.31	0.0592906	0.942408	1.69059	0.00682911	Tb427_090080700	FALSE	FALSE	undetected
4071	Tb427-070040100	0.00677444	0.00990099	0.00210325	0.0725259	3.55224	FALSE	1588.15	0.021549	0.979319	2.94431	0.00682911	Tb427_070040100	FALSE	undetected	undetected
8669	Tb427-110101500	0.000419705	0.019802	0.00210864	0.497193	1.2423	FALSE	4582.75	0.0864071	0.916099	1.6371	0.00683896	Tb427_110101500	FALSE	FALSE	undetected
5576	Tb427-090033900:pseudogene	0.072741	0.00990099	0.00211866	0.323823	3.71374	FALSE	343.477	0.00338904	0.996728	6.1389	0.00686916	Tb427_090033900:pseudogene	FALSE	undetected	undetected
2464	Tb427-040020100	0.000298846	0.00990099	0.0021281	0.807532	1.00107	FALSE	5390.55	0.108775	0.894372	1.52927	0.00689515	Tb427_040020100	FALSE	undetected	undetected
3634	Tb427-060044100	0.00437413	0.00990099	0.00212793	0.447808	3.53288	FALSE	1871.7	0.0264643	0.974346	2.82588	0.00689515	Tb427_060044100	FALSE	undetected	undetected
1068	Tb427-000790100:pseudogene	0.0113746	0.00990099	0.00226576	0.614846	3.38621	FALSE	297.228	0.00291067	0.99699	69.2784	0.00726829	Tb427_000790100:pseudogene	FALSE	undetected	undetected
3031	Tb427-050026600	0.0360988	0.00990099	0.00230214	0.206081	4.69839	FALSE	6984.85	0.158399	0.851571	1.52445	0.00736306	Tb427_050026600	FALSE	undetected	undetected
2750	Tb427-040049900	0.00621183	0.00990099	0.00235017	0.3709	3.1321	FALSE	3498.35	0.0595779	0.94267	1.68276	0.00749195	Tb427_040049900	FALSE	undetected	undetected
4317	Tb427-070064700	0.00894102	0.00990099	0.0024267	0.414059	4.26122	FALSE	7179.66	0.165844	0.842277	1.60116	0.00770548	Tb427_070064700	FALSE	undetected	undetected
8583	Tb427-110091800	1.91335e-05	0.019802	0.00243108	0.635516	1.00107	FALSE	6845.96	0.153877	0.855497	1.52522	0.00771435	Tb427_110091800	FALSE	FALSE	undetected
7194	Tb427-100115500	0.0115065	0.00990099	0.00243739	0.115369	4.50097	FALSE	1561.1	0.0210508	0.978796	2.85728	0.00772677	Tb427_100115500	FALSE	undetected	undetected
7780	Tb427-110010700	0.00197847	0.00990099	0.00247565	0.541321	3.8304	FALSE	5939.11	0.124007	0.885209	1.59562	0.00782246	Tb427_110010700	FALSE	FALSE	undetected
694	Tb427-000672600	0.00818696	0.00990099	0.00253854	0.963883	3.01905	FALSE	352.638	0.00350471	0.996466	8.87407	0.00800291	Tb427_000672600	FALSE	undetected	undetected
6884	Tb427-100082700	0.00644896	0.00990099	0.00257495	0.103344	3.15003	FALSE	1241.88	0.0158539	0.984555	3.16209	0.00810453	Tb427_100082700	FALSE	undetected	undetected
8041	Tb427-110037200:pseudogene	0.000807979	0.00990099	0.00261066	0.170746	2.57226	FALSE	1335.9	0.0175767	0.983639	2.94051	0.00820361	Tb427_110037200:pseudogene	FALSE	undetected	undetected
8019	Tb427-110034900	0.00537693	0.019802	0.00265176	0.437201	3.48425	FALSE	5651.68	0.116267	0.888089	1.56908	0.00832197	Tb427_110034900	FALSE	FALSE	undetected
999	Tb427-000769600	0.000447346	0.00990099	0.00269458	0.758062	2.58776	FALSE	1059.3	0.0131852	0.987435	3.58484	0.00843993	Tb427_000769600	FALSE	undetected	undetected
1047	Tb427-000783300:pseudogene	0.0549654	0.019802	0.00274874	0.132584	4.34407	FALSE	246.272	0.00232453	0.997775	34.1702	0.00857907	Tb427_000783300:pseudogene	FALSE	undetected	undetected
1514	Tb427-010032100	0.0163363	0.00990099	0.00282927	0.452587	3.88347	FALSE	5513.17	0.111713	0.893848	1.50486	0.00880158	Tb427_010032100	FALSE	undetected	undetected
502	Tb427-000544800:pseudogene	0.00105047	0.00990099	0.00284586	0.0653447	1.00079	FALSE	760.277	0.00892594	0.991754	6.01802	0.00884234	Tb427_000544800:pseudogene	FALSE	undetected	undetected
1969	Tb427-030022200	0.00322142	0.00990099	0.00301769	0.581533	3.70087	FALSE	3254.88	0.0541484	0.947644	1.90304	0.00931648	Tb427_030022200	FALSE	undetected	undetected
7136	Tb427-100108500	0.000549704	0.00990099	0.00316348	0.277889	4.83653	FALSE	4654.71	0.0881823	0.915838	2.30241	0.00970169	Tb427_100108500	FALSE	FALSE	undetected
8671	Tb427-110101700	0.00823905	0.00990099	0.00322689	0.292268	2.89047	FALSE	5458.76	0.110359	0.89411	1.52445	0.00987115	Tb427_110101700	FALSE	undetected	undetected
7166	Tb427-100112400	0	0.00990099	0	0.776924	4.98983	FALSE	14672.2	0.799024	0.501178	17.4191	0	Tb427_100112400	TRUE	undetected	undetected
3562	Tb427-060036900	0	0.00990099	4.6674e-293	0.958796	4.98921	FALSE	14473.2	0.63726	0.534555	4.81182	9.04636e-290	Tb427_060036900	TRUE	undetected	undetected
4390	Tb427-070072300	0	0.00990099	7.86406e-223	0.235229	4.87159	FALSE	12504.7	0.456013	0.621728	4.61686	7.62106e-220	Tb427_070072300	TRUE	TRUE	undetected
7165	Tb427-100112200	0	0.00990099	2.31544e-207	0.375511	4.94824	FALSE	8548.45	0.275418	0.762827	21.4267	1.49593e-204	Tb427_100112200	FALSE	undetected	undetected
5582	Tb427-090034500	0	0.00990099	1.04149e-191	0.576528	4.84937	FALSE	20937.6	1.59793	0.133508	1.50352	5.31215e-189	Tb427_090034500	FALSE	undetected	undetected
7907	Tb427-110023600	0	0.00990099	5.09482e-190	0.834911	4.95888	FALSE	9488.38	0.309688	0.733508	19.7024	2.46869e-187	Tb427_110023600	FALSE	undetected	undetected
2477	Tb427-040021400	0	0.00990099	3.24952e-187	0.355168	4.99564	FALSE	17768.7	0.943972	0.358508	2.37942	1.36918e-184	Tb427_040021400	TRUE	TRUE	undetected
9246	Tb427-110166800	0	0.00990099	2.79072e-184	0.92542	4.98619	FALSE	10495.4	0.363407	0.689005	6.07851	1.12687e-181	Tb427_110166800	TRUE	undetected	undetected
4632	Tb427-080019600	0	0.00990099	4.41491e-177	0.777652	4.98678	FALSE	11738.3	0.427775	0.649869	5.30972	1.52803e-174	Tb427_080019600	FALSE	TRUE	undetected
8370	Tb427-110070500	0	0.00990099	2.12296e-176	0.599091	4.99652	FALSE	11044.2	0.37126	0.684424	4.21141	7.09436e-174	Tb427_110070500	TRUE	undetected	undetected
1831	Tb427-030008400	0	0.00990099	5.77236e-176	0.630995	4.99682	FALSE	10478.5	0.396292	0.684817	76.7404	1.86466e-173	Tb427_030008400	TRUE	undetected	undetected
7020	Tb427-100096900	0	0.00990099	1.02371e-175	0.761769	4.98903	FALSE	9322.48	0.326858	0.728796	70.7067	3.20026e-173	Tb427_100096900	TRUE	undetected	undetected
7822	Tb427-110015000	0	0.00990099	4.25196e-169	0.285951	4.94805	FALSE	12618.1	0.476633	0.619503	5.07555	1.21193e-166	Tb427_110015000	TRUE	TRUE	undetected
7897	Tb427-110022600	0	0.00990099	4.38569e-169	0.818264	4.91758	FALSE	7767.5	0.2214	0.804058	14.2835	1.21434e-166	Tb427_110022600	FALSE	undetected	undetected
4356	Tb427-070068800	0	0.00990099	4.53764e-161	0.898834	4.99546	FALSE	10786.4	0.364534	0.701047	9.05217	1.15722e-158	Tb427_070068800	TRUE	undetected	undetected
7164	Tb427-100112000	0	0.00990099	1.06139e-160	0.90295	4.96612	FALSE	8662.54	0.287544	0.75733	22.2639	2.63742e-158	Tb427_100112000	FALSE	undetected	undetected
3793	Tb427-070009500	0	0.00990099	1.57177e-160	0.840799	4.99249	FALSE	8829.96	0.260459	0.763351	5.47503	3.808e-158	Tb427_070009500	TRUE	undetected	undetected
3529	Tb427-060033600	0	0.00990099	6.56641e-158	0.533166	4.97789	FALSE	10639.6	0.334443	0.716492	5.06876	1.51512e-155	Tb427_060033600	TRUE	TRUE	undetected
2980	Tb427-050021300	0	0.00990099	2.63719e-157	0.0518478	4.99543	FALSE	10551	0.357271	0.696597	16.713	5.94349e-155	Tb427_050021300	TRUE	undetected	undetected
4212	Tb427-070054200	0	0.00990099	2.97206e-154	0.587292	4.99354	FALSE	8462.03	0.262341	0.776702	51.6805	6.40051e-152	Tb427_070054200	FALSE	undetected	undetected
7630	Tb427-100161200	0	0.00990099	3.35272e-151	0.705846	4.9349	FALSE	19614	1.25113	0.229058	1.8753	6.76901e-149	Tb427_100161200	TRUE	undetected	undetected
3271	Tb427-050052600	0	0.00990099	3.88374e-140	0.113442	4.97	FALSE	11449.6	0.389197	0.670681	3.66352	6.96988e-138	Tb427_050052600	TRUE	undetected	undetected
4577	Tb427-080011700	0	0.00990099	9.41104e-140	0.3668	4.93101	FALSE	9320.79	0.286117	0.743717	8.69876	1.65823e-137	Tb427_080011700	TRUE	undetected	undetected
4533	Tb427-080007300	0	0.00990099	4.11515e-136	0.540811	4.90377	FALSE	14073.6	0.56705	0.546335	4.33901	6.99648e-134	Tb427_080007300	TRUE	TRUE	undetected
6912	Tb427-100085500	0	0.00990099	2.6143e-135	0.733017	4.99159	FALSE	14761.4	0.618219	0.539398	4.466	4.2941e-133	Tb427_100085500	TRUE	undetected	undetected
7018	Tb427-100096700	0	0.00990099	6.13225e-135	0.062608	4.98378	FALSE	8529.05	0.254622	0.778665	15.8103	9.9046e-133	Tb427_100096700	FALSE	undetected	undetected
4867	Tb427-080043400	0	0.00990099	1.21288e-133	0.871247	4.99566	FALSE	10801.3	0.356716	0.707723	8.73429	1.89581e-131	Tb427_080043400	TRUE	undetected	undetected
7898	Tb427-110022700	0	0.00990099	8.36236e-133	0.0655913	4.94752	FALSE	8192.18	0.245504	0.784293	17.4303	1.28634e-130	Tb427_110022700	FALSE	undetected	undetected
6747	Tb427-100067700	0	0.00990099	2.00533e-132	0.119815	4.93833	FALSE	9701.03	0.296367	0.73678	4.56117	3.03651e-130	Tb427_100067700	TRUE	undetected	undetected
3898	Tb427-070020200	0	0.00990099	3.13144e-127	0.926078	4.98318	FALSE	7653.48	0.207171	0.81466	17.0992	4.52938e-125	Tb427_070020200	TRUE	undetected	undetected
6204	Tb427-100012000	0	0.00990099	2.2347e-126	0.833436	4.95029	FALSE	11097	0.361681	0.690183	6.53688	3.18477e-124	Tb427_100012000	TRUE	TRUE	undetected
4259	Tb427-070058900	0	0.00990099	4.28755e-118	0.505426	4.99612	FALSE	8311.37	0.251784	0.787042	36.936	5.69187e-116	Tb427_070058900	TRUE	TRUE	undetected
8217	Tb427-110055200	0	0.00990099	1.21867e-111	0.893559	4.99122	FALSE	8091.6	0.22052	0.80877	12.1785	1.55397e-109	Tb427_110055200	TRUE	undetected	undetected
7989	Tb427-110031900	0	0.00990099	6.1638e-106	0.0919276	4.93877	FALSE	6740.7	0.180489	0.834293	11.9211	7.3745e-104	Tb427_110031900	TRUE	undetected	undetected
7709	Tb427-100170300	0	0.00990099	1.16818e-103	0.808063	4.99186	FALSE	5986.08	0.154372	0.867539	99.3488	1.31637e-101	Tb427_100170300	TRUE	undetected	undetected
4015	Tb427-070032700	0	0.00990099	1.19691e-103	0.755504	4.91627	FALSE	6893.88	0.188138	0.826832	17.862	1.33325e-101	Tb427_070032700	FALSE	undetected	undetected
8833	Tb427-110124600	0	0.00990099	6.61168e-97	0.742188	4.97168	FALSE	14506.9	0.581531	0.547382	2.52918	6.96454e-95	Tb427_110124600	TRUE	TRUE	undetected
4396	Tb427-070072900	0	0.00990099	8.48173e-95	0.748966	4.99246	FALSE	11874.8	0.3999	0.657984	3.01938	8.7443e-93	Tb427_070072900	FALSE	undetected	undetected
1715	Tb427-020024900	0	0.00990099	3.37051e-94	0.874504	4.98763	FALSE	7779.38	0.217844	0.809817	30.3504	3.40246e-92	Tb427_020024900	TRUE	TRUE	undetected
1930	Tb427-030018300	0	0.00990099	5.59746e-94	0.521119	4.99162	FALSE	9359.01	0.278729	0.762958	11.6863	5.5352e-92	Tb427_030018300	TRUE	undetected	undetected
2016	Tb427-030028200	0	0.00990099	1.04205e-93	0.953943	4.9563	FALSE	7998.75	0.203278	0.814398	5.64362	1.00985e-91	Tb427_030028200	TRUE	undetected	undetected
2177	Tb427-030046000	0	0.00990099	5.11484e-93	0.121326	4.98763	FALSE	10565.5	0.341858	0.699084	3.72813	4.8596e-91	Tb427_030046000	FALSE	undetected	undetected
8490	Tb427-110082500	0	0.00990099	2.12092e-91	0.807814	4.9853	FALSE	13413.4	0.501354	0.584293	2.68634	1.99552e-89	Tb427_110082500	FALSE	undetected	undetected
9024	Tb427-110144100	0	0.00990099	1.39548e-89	0.977412	4.97121	FALSE	8468.15	0.231053	0.799215	6.12232	1.27581e-87	Tb427_110144100	TRUE	undetected	undetected
7808	Tb427-110013600	0	0.00990099	1.10974e-88	0.433243	4.99367	FALSE	11036	0.357274	0.687435	3.88332	9.95785e-87	Tb427_110013600	TRUE	undetected	undetected
4161	Tb427-070049100	0	0.00990099	1.80762e-88	0.950758	4.9177	FALSE	7470.15	0.186774	0.829843	7.16494	1.60713e-86	Tb427_070049100	FALSE	TRUE	undetected
6249	Tb427-100016600:pseudogene	0	0.00990099	1.51798e-84	0.0925836	4.98998	FALSE	7097.1	0.191386	0.829712	35.5842	1.30183e-82	Tb427_100016600:pseudogene	FALSE	undetected	undetected
4450	Tb427-070079100	0	0.00990099	1.8512e-84	0.426645	4.97655	FALSE	6880.17	0.173064	0.841754	24.3014	1.57369e-82	Tb427_070079100	TRUE	undetected	undetected
7352	Tb427-100131800	0	0.00990099	2.79265e-84	0.122208	4.97395	FALSE	6950.41	0.171429	0.845681	7.02762	2.35335e-82	Tb427_100131800	FALSE	TRUE	undetected
9255	Tb427-110167700	0	0.00990099	4.80217e-84	0.558761	4.99296	FALSE	11009.4	0.343917	0.706937	3.63495	4.01189e-82	Tb427_110167700	TRUE	FALSE	undetected
3945	Tb427-070025700	0	0.00990099	7.03998e-80	0.631242	4.85333	FALSE	9925.85	0.303377	0.733508	6.87645	5.68537e-78	Tb427_070025700	TRUE	undetected	undetected
7397	Tb427-100136400	0	0.00990099	9.56151e-80	0.421494	4.79416	FALSE	9336.07	0.273022	0.751178	5.45865	7.6579e-78	Tb427_100136400	TRUE	TRUE	undetected
7851	Tb427-110017900	0	0.00990099	2.38923e-75	0.895394	4.97176	FALSE	9657.51	0.289906	0.748298	10.2453	1.80891e-73	Tb427_110017900	TRUE	TRUE	undetected
2240	Tb427-030053000	0	0.00990099	1.1428e-74	0.543883	4.9659	FALSE	9351.97	0.269168	0.760602	6.24527	8.39005e-73	Tb427_030053000	TRUE	TRUE	undetected
9247	Tb427-110166900	0	0.00990099	6.28398e-73	0.69594	4.89412	FALSE	7618.62	0.190434	0.820942	3.6833	4.38116e-71	Tb427_110166900	FALSE	undetected	undetected
6438	Tb427-100036400	0	0.00990099	6.47277e-72	0.422405	4.98622	FALSE	9576.02	0.276541	0.760864	4.55508	4.44877e-70	Tb427_100036400	TRUE	undetected	undetected
3254	Tb427-050050900	0	0.00990099	9.94075e-72	0.204972	4.97508	FALSE	6814.46	0.167222	0.846859	15.0513	6.78421e-70	Tb427_050050900	FALSE	undetected	undetected
5367	Tb427-090011700	0	0.00990099	1.05578e-69	0.809832	4.97509	FALSE	5817.11	0.140378	0.871204	41.771	6.91322e-68	Tb427_090011700	FALSE	FALSE	undetected
8579	Tb427-110091400	0	0.00990099	1.20756e-68	0.928344	4.87501	FALSE	10451.6	0.316788	0.718455	2.65885	7.6487e-67	Tb427_110091400	FALSE	TRUE	undetected
7133	Tb427-100108200	0	0.00990099	3.23754e-67	0.106265	4.94821	FALSE	7031.11	0.167689	0.851309	4.94434	2.02419e-65	Tb427_100108200	TRUE	FALSE	undetected
7814	Tb427-110014200	0	0.00990099	4.95722e-67	0.967005	4.98564	FALSE	9904.78	0.289767	0.750785	3.57679	3.07951e-65	Tb427_110014200	TRUE	TRUE	undetected
9194	Tb427-110161600	0	0.00990099	1.12236e-66	0.728816	4.9243	FALSE	7542.3	0.193833	0.817016	4.48732	6.84073e-65	Tb427_110161600	TRUE	undetected	undetected
4556	Tb427-080009600	0	0.00990099	1.50659e-66	0.0713327	4.98883	FALSE	3291.33	0.0652106	0.939529	219.449	9.06855e-65	Tb427_080009600	FALSE	undetected	undetected
183	Tb427-000198100:pseudogene	0	0.00990099	3.52919e-65	0.776282	4.80487	FALSE	7045.52	0.177391	0.833377	8.86408	2.07281e-63	Tb427_000198100:pseudogene	FALSE	undetected	undetected
5463	Tb427-090022100	0	0.00990099	2.51637e-64	0.554308	4.7256	FALSE	10744.6	0.332288	0.704974	2.92437	1.46025e-62	Tb427_090022100	FALSE	TRUE	undetected
4350	Tb427-070068200	0	0.00990099	4.76686e-64	0.83291	4.83616	FALSE	6394.44	0.150152	0.857853	8.56572	2.73347e-62	Tb427_070068200	FALSE	TRUE	undetected
2903	Tb427-050013300	0	0.00990099	8.08208e-63	0.5614	4.74301	FALSE	11227.5	0.360595	0.685733	3.60478	4.58032e-61	Tb427_050013300	TRUE	undetected	undetected
7400	Tb427-100136700	0	0.00990099	9.48606e-63	0.355229	4.97241	FALSE	9087.11	0.252633	0.776178	4.61157	5.34473e-61	Tb427_100136700	TRUE	FALSE	undetected
3172	Tb427-050041100	0	0.00990099	1.27128e-62	0.771252	4.97948	FALSE	6172.12	0.150436	0.860079	37.7032	7.12139e-61	Tb427_050041100	TRUE	undetected	undetected
3880	Tb427-070018400	0	0.00990099	1.48482e-62	0.88922	4.97301	FALSE	10304.7	0.311392	0.731675	4.19286	8.26975e-61	Tb427_070018400	TRUE	TRUE	undetected
6093	Tb427-090088700	0	0.00990099	3.16041e-62	0.603733	4.9569	FALSE	6842.4	0.169443	0.844241	15.301	1.7402e-60	Tb427_090088700	TRUE	TRUE	undetected
5724	Tb427-090049200	0	0.00990099	1.78767e-61	0.742369	4.98033	FALSE	8970.5	0.249204	0.782984	4.36228	9.73275e-60	Tb427_090049200	TRUE	FALSE	undetected
8403	Tb427-110073800	0	0.00990099	1.09578e-60	0.557693	4.94085	FALSE	18860.9	1.0668	0.284948	1.57827	5.86698e-59	Tb427_110073800	FALSE	TRUE	undetected
3377	Tb427-060015700	0	0.00990099	1.97257e-60	0.2983	4.94763	FALSE	7383.45	0.183387	0.825524	3.85499	1.03892e-58	Tb427_060015700	FALSE	TRUE	undetected
1497	Tb427-010030000	0	0.00990099	4.24345e-60	0.329898	4.984	FALSE	9717.04	0.281701	0.754188	6.24629	2.22288e-58	Tb427_010030000	TRUE	TRUE	undetected
3378	Tb427-060015800	0	0.00990099	5.45076e-60	0.273837	4.95605	FALSE	9598.6	0.278514	0.755497	6.2022	2.82478e-58	Tb427_060015800	TRUE	undetected	undetected
8046	Tb427-110037700	0	0.00990099	3.55464e-59	0.581898	4.97811	FALSE	9364.5	0.269691	0.768586	5.47317	1.82265e-57	Tb427_110037700	TRUE	FALSE	undetected
4211	Tb427-070054100	0	0.00990099	3.79295e-59	0.320228	4.8754	FALSE	5535.63	0.122639	0.882723	5.02879	1.92448e-57	Tb427_070054100	FALSE	undetected	undetected
1432	Tb427-010022700	0	0.00990099	8.18258e-59	0.948237	4.90413	FALSE	12929.3	0.452038	0.622906	2.44285	4.10867e-57	Tb427_010022700	TRUE	FALSE	undetected
6202	Tb427-100011800	0	0.00990099	2.88911e-58	0.919736	4.94453	FALSE	10146	0.305594	0.728141	3.61974	1.43581e-56	Tb427_100011800	TRUE	TRUE	undetected
1844	Tb427-030009700	0	0.00990099	1.9248e-57	0.653187	4.94947	FALSE	9924.36	0.292392	0.741885	5.2207	9.18878e-56	Tb427_030009700	TRUE	FALSE	undetected
8997	Tb427-110141400	0	0.00990099	3.83106e-57	0.287415	4.98392	FALSE	6191.44	0.142802	0.867277	11.8578	1.81994e-55	Tb427_110141400	FALSE	FALSE	undetected
8832	Tb427-110124500	0	0.00990099	2.70225e-56	0.818902	4.92699	FALSE	8375.81	0.219179	0.804712	4.04811	1.25299e-54	Tb427_110124500	TRUE	TRUE	undetected
6621	Tb427-100054800:pseudogene	0	0.00990099	1.5885e-55	0.98459	4.93059	FALSE	9636	0.281239	0.755236	6.25344	7.2273e-54	Tb427_100054800:pseudogene	FALSE	undetected	undetected
4293	Tb427-070062300	0	0.00990099	2.02632e-54	0.417588	4.97908	FALSE	5779.96	0.129874	0.88089	10.0128	9.00783e-53	Tb427_070062300	TRUE	undetected	undetected
3194	Tb427-050043300	0	0.00990099	6.05417e-54	0.750626	4.6724	FALSE	4916.14	0.104791	0.897775	9.4057	2.66686e-52	Tb427_050043300	TRUE	undetected	undetected
9059	Tb427-110147900	0	0.00990099	7.27008e-54	0.864442	4.85903	FALSE	6173.1	0.141558	0.865838	5.10704	3.17362e-52	Tb427_110147900	TRUE	TRUE	undetected
2265	Tb427-030055500	0	0.00990099	1.72508e-53	0.480084	4.93511	FALSE	7272.79	0.182841	0.832461	12.402	7.49676e-52	Tb427_030055500	TRUE	undetected	undetected
5823	Tb427-090059100	0	0.00990099	2.30727e-53	0.433137	4.93016	FALSE	9737.98	0.275083	0.756545	2.94248	9.98205e-52	Tb427_090059100	TRUE	FALSE	undetected
9028	Tb427-110144500	0	0.00990099	7.60975e-53	0.141506	4.97073	FALSE	4714.99	0.0993988	0.906806	16.1116	3.2776e-51	Tb427_110144500	FALSE	undetected	undetected
5338	Tb427-090007800	0	0.00990099	2.50876e-52	0.927907	4.97439	FALSE	5014.74	0.109064	0.898691	28.1688	1.07577e-50	Tb427_090007800	TRUE	undetected	undetected
6341	Tb427-100026200	0	0.00990099	4.35362e-52	0.747285	4.9693	FALSE	9817.87	0.282105	0.751047	3.605	1.85863e-50	Tb427_100026200	TRUE	FALSE	undetected
6252	Tb427-100016900	0	0.00990099	2.27698e-51	0.194506	4.698	FALSE	16426.4	0.748262	0.436518	2.07288	9.51128e-50	Tb427_100016900	FALSE	FALSE	undetected
8249	Tb427-110058400	0	0.00990099	4.06244e-51	0.940139	4.79102	FALSE	6192.37	0.143173	0.865183	8.46953	1.68966e-49	Tb427_110058400	TRUE	undetected	undetected
6032	Tb427-090082500	0	0.00990099	1.55614e-50	0.42669	4.65532	FALSE	17094.1	0.826279	0.393455	1.8322	6.41724e-49	Tb427_090082500	FALSE	undetected	undetected
2571	Tb427-040030800	0	0.00990099	2.04302e-50	0.25523	4.95122	FALSE	11644.8	0.37527	0.676963	2.28447	8.35398e-49	Tb427_040030800	FALSE	FALSE	undetected
5933	Tb427-090070900	0	0.00990099	8.61573e-50	0.239201	4.93124	FALSE	8246.59	0.212499	0.809817	3.23706	3.50819e-48	Tb427_090070900	TRUE	undetected	undetected
7746	Tb427-110007300	0	0.00990099	3.58266e-49	0.682907	4.94814	FALSE	7133.44	0.172899	0.839398	8.14692	1.44665e-47	Tb427_110007300	TRUE	undetected	undetected
9248	Tb427-110167000	0	0.00990099	6.80525e-49	0.979697	4.96507	FALSE	4739.18	0.0961121	0.911257	8.76637	2.7365e-47	Tb427_110167000	TRUE	undetected	undetected
9242	Tb427-110166400	0	0.00990099	9.30997e-49	0.364233	4.95287	FALSE	5791.33	0.129443	0.879058	13.5078	3.71288e-47	Tb427_110166400	TRUE	undetected	undetected
7904	Tb427-110023300	0	0.00990099	1.06528e-48	0.986148	4.8658	FALSE	7569.13	0.187495	0.826178	3.13897	4.23098e-47	Tb427_110023300	FALSE	undetected	undetected
1453	Tb427-010024800	0	0.00990099	4.69275e-48	0.0620691	4.92359	FALSE	8189.23	0.215003	0.801571	6.60297	1.84119e-46	Tb427_010024800	TRUE	undetected	undetected
8564	Tb427-110089900	0	0.00990099	7.71603e-48	0.731922	4.75056	FALSE	8187.34	0.212552	0.800131	2.82848	3.01516e-46	Tb427_110089900	TRUE	TRUE	undetected
6574	Tb427-100050100:pseudogene	0	0.00990099	2.01984e-47	0.508332	4.95641	FALSE	8108.2	0.207429	0.811126	4.22181	7.79851e-46	Tb427_100050100:pseudogene	FALSE	undetected	undetected
6103	Tb427-090089700	0	0.00990099	1.43389e-46	0.850403	4.93641	FALSE	11457.1	0.365521	0.686911	3.65866	5.44934e-45	Tb427_090089700	FALSE	FALSE	undetected
4183	Tb427-070051300	0	0.00990099	1.66228e-46	0.164754	4.96874	FALSE	7668.78	0.192227	0.825654	7.33039	6.29264e-45	Tb427_070051300	TRUE	undetected	undetected
7839	Tb427-110016700	0	0.00990099	1.07417e-45	0.290131	4.98925	FALSE	6577.12	0.154401	0.859031	4.58255	4.03481e-44	Tb427_110016700	TRUE	TRUE	undetected
7374	Tb427-100134100	0	0.00990099	3.1022e-45	0.619323	4.95549	FALSE	10092	0.296789	0.732723	2.99203	1.14746e-43	Tb427_100134100	TRUE	undetected	undetected
6768	Tb427-100069800	0	0.00990099	6.20496e-45	0.737803	4.74847	FALSE	6494.01	0.15471	0.85288	7.76318	2.27774e-43	Tb427_100069800	TRUE	undetected	undetected
2901	Tb427-050013100	0	0.00990099	6.43258e-44	0.523877	4.93788	FALSE	7966.06	0.203155	0.818063	4.25345	2.34354e-42	Tb427_050013100	TRUE	TRUE	undetected
3963	Tb427-070027500	0	0.00990099	1.90144e-43	0.901442	4.98636	FALSE	5936.49	0.132543	0.873822	3.93461	6.90143e-42	Tb427_070027500	TRUE	FALSE	undetected
6844	Tb427-100078600	0	0.00990099	3.29613e-43	0.843204	4.93691	FALSE	6331.7	0.145173	0.867801	5.84787	1.18747e-41	Tb427_100078600	TRUE	FALSE	undetected
3807	Tb427-070010900	0	0.00990099	1.48946e-42	0.203114	4.93527	FALSE	7419.5	0.187845	0.826702	10.8537	5.32633e-41	Tb427_070010900	TRUE	undetected	undetected
2814	Tb427-040056500	0	0.00990099	1.74816e-42	0.818369	4.77	FALSE	9611.06	0.275729	0.750262	3.52272	6.22847e-41	Tb427_040056500	TRUE	undetected	undetected
6062	Tb427-090085500	0	0.00990099	3.45972e-42	0.497046	4.97292	FALSE	9681.41	0.276817	0.754581	4.04258	1.21479e-40	Tb427_090085500	TRUE	FALSE	undetected
5715	Tb427-090048300	0	0.00990099	3.54516e-42	0.447858	4.90696	FALSE	7899.18	0.201117	0.815052	4.8584	1.24029e-40	Tb427_090048300	TRUE	undetected	undetected
5195	Tb427-080077000	0	0.00990099	6.10863e-42	0.950966	4.91873	FALSE	6695.32	0.160022	0.850393	9.80617	2.12182e-40	Tb427_080077000	TRUE	undetected	undetected
6516	Tb427-100044200	0	0.00990099	9.39968e-42	0.883328	4.90872	FALSE	12202.3	0.406134	0.652618	2.15177	3.2533e-40	Tb427_100044200	FALSE	undetected	undetected
5991	Tb427-090078400	0	0.00990099	1.06416e-41	0.83897	4.77611	FALSE	5326.45	0.114045	0.88822	8.64238	3.65702e-40	Tb427_090078400	TRUE	TRUE	undetected
3804	Tb427-070010600	0	0.00990099	2.43322e-41	0.216615	4.91873	FALSE	5168.99	0.10646	0.900916	5.53045	8.30292e-40	Tb427_070010600	TRUE	undetected	undetected
3721	Tb427-060053400	0	0.00990099	2.58406e-41	0.644444	4.77863	FALSE	8854.38	0.237073	0.777749	2.23949	8.78671e-40	Tb427_060053400	TRUE	TRUE	undetected
8371	Tb427-110070600	0	0.00990099	3.72942e-41	0.848381	4.88378	FALSE	5803.89	0.129557	0.873298	4.02011	1.24627e-39	Tb427_110070600	TRUE	FALSE	undetected
2019	Tb427-030028500	0	0.00990099	3.72266e-41	0.461385	4.95165	FALSE	6582.88	0.15366	0.858246	8.02009	1.24627e-39	Tb427_030028500	TRUE	undetected	undetected
3308	Tb427-060008400	0	0.00990099	6.58651e-41	0.715074	4.94385	FALSE	22062.9	1.58959	0.174738	1.5325	2.1785e-39	Tb427_060008400	FALSE	undetected	undetected
5113	Tb427-080068700	0	0.00990099	2.3254e-40	0.281593	4.90078	FALSE	10097.4	0.293883	0.740707	2.94454	7.63915e-39	Tb427_080068700	TRUE	FALSE	undetected
6059	Tb427-090085200	0	0.00990099	8.27309e-40	0.422557	4.96703	FALSE	6645.15	0.152774	0.859293	6.32812	2.69042e-38	Tb427_090085200	TRUE	TRUE	undetected
2100	Tb427-030038100	0	0.00990099	9.27914e-40	0.760161	4.83145	FALSE	5588.38	0.119999	0.887958	6.30341	3.00749e-38	Tb427_030038100	FALSE	undetected	undetected
7092	Tb427-100104100	0	0.00990099	1.80901e-39	0.337479	4.98332	FALSE	6739.93	0.159606	0.849215	4.30121	5.82429e-38	Tb427_100104100	TRUE	undetected	undetected
3443	Tb427-060023400	0	0.00990099	2.10843e-39	0.865896	4.91365	FALSE	6419.76	0.146391	0.865314	5.02093	6.76584e-38	Tb427_060023400	FALSE	FALSE	undetected
3742	Tb427-060056000	0	0.00990099	1.72762e-38	0.342189	4.83427	FALSE	7667.8	0.188091	0.829843	3.2542	5.40076e-37	Tb427_060056000	FALSE	TRUE	undetected
3348	Tb427-060012400	0	0.00990099	1.99298e-38	0.803499	4.86481	FALSE	6279.16	0.141751	0.870026	4.70449	6.21029e-37	Tb427_060012400	TRUE	undetected	undetected
6823	Tb427-100076500	0	0.00990099	2.1592e-38	0.96665	4.67828	FALSE	8006.9	0.201604	0.813743	4.0222	6.70666e-37	Tb427_100076500	FALSE	FALSE	undetected
3589	Tb427-060039600	0	0.00990099	5.86704e-38	0.6993	4.92999	FALSE	4121.04	0.0799712	0.923429	19.1556	1.81075e-36	Tb427_060039600	FALSE	TRUE	undetected
5988	Tb427-090078100	0	0.00990099	6.61289e-38	0.727092	4.63206	FALSE	9125.17	0.250565	0.768586	3.59949	2.03446e-36	Tb427_090078100	FALSE	undetected	undetected
5237	Tb427-080081200	0	0.00990099	2.15266e-37	0.375069	4.93255	FALSE	7000.17	0.164207	0.848822	3.65822	6.51919e-36	Tb427_080081200	TRUE	undetected	undetected
7990	Tb427-110032000	0	0.00990099	2.43587e-37	0.929024	4.9039	FALSE	4854.84	0.100908	0.903272	15.8288	7.35391e-36	Tb427_110032000	TRUE	undetected	undetected
2335	Tb427-040007200	0	0.00990099	4.51307e-37	0.7068	4.81996	FALSE	8963.48	0.24075	0.779581	3.53213	1.34988e-35	Tb427_040007200	FALSE	TRUE	undetected
2515	Tb427-040025200	0	0.00990099	7.86838e-37	0.971657	4.95509	FALSE	5421.93	0.115434	0.891492	8.34164	2.33903e-35	Tb427_040025200	TRUE	undetected	undetected
6436	Tb427-100036200	0	0.00990099	2.98443e-36	0.317706	4.9312	FALSE	6150.83	0.137995	0.872513	7.80502	8.7909e-35	Tb427_100036200	TRUE	FALSE	undetected
6453	Tb427-100037900	0	0.00990099	8.95141e-36	0.349022	4.6318	FALSE	7786.71	0.190939	0.821859	2.16176	2.59725e-34	Tb427_100037900	FALSE	FALSE	undetected
8608	Tb427-110094400	0	0.00990099	1.02714e-35	0.450784	4.95919	FALSE	7405.65	0.180401	0.835471	5.54887	2.97134e-34	Tb427_110094400	TRUE	FALSE	undetected
3374	Tb427-060015400	0	0.00990099	2.06166e-35	0.05963	4.92761	FALSE	7997.56	0.202999	0.814005	3.47935	5.92866e-34	Tb427_060015400	TRUE	FALSE	undetected
1345	Tb427-010012500	0	0.00990099	3.35622e-35	0.752397	4.93187	FALSE	10144.2	0.289712	0.748822	2.36065	9.53815e-34	Tb427_010012500	FALSE	undetected	undetected
4463	Tb427-070080400	0	0.00990099	4.34585e-35	0.0763075	4.90527	FALSE	7522.33	0.184664	0.830497	4.48843	1.23145e-33	Tb427_070080400	TRUE	undetected	undetected
4835	Tb427-080040200	0	0.00990099	4.96244e-35	0.913605	4.88514	FALSE	4883.95	0.099155	0.907723	5.70132	1.40207e-33	Tb427_080040200	FALSE	undetected	undetected
1946	Tb427-030019900	0	0.00990099	5.26632e-35	0.547286	4.76138	FALSE	7228.04	0.177021	0.831283	3.145	1.48069e-33	Tb427_030019900	TRUE	TRUE	undetected
4400	Tb427-070073300	0	0.00990099	5.27128e-35	0.176736	4.98149	FALSE	6930.54	0.162507	0.851702	4.30061	1.48069e-33	Tb427_070073300	TRUE	FALSE	undetected
5351	Tb427-090009100	0	0.00990099	5.40094e-35	0.0383385	4.94105	FALSE	7453.92	0.181155	0.835602	3.96582	1.51273e-33	Tb427_090009100	FALSE	FALSE	undetected
8931	Tb427-110134700	0	0.00990099	9.35137e-35	0.768114	4.87764	FALSE	7814.45	0.194415	0.822906	3.37767	2.60414e-33	Tb427_110134700	FALSE	TRUE	undetected
9045	Tb427-110146500	0	0.00990099	4.66981e-34	0.623528	4.89972	FALSE	6623.88	0.152486	0.853665	3.07749	1.27121e-32	Tb427_110146500	TRUE	FALSE	undetected
8866	Tb427-110127900	0	0.00990099	1.04328e-33	0.753502	4.66166	FALSE	6061.64	0.135029	0.872251	6.23586	2.79292e-32	Tb427_110127900	FALSE	TRUE	undetected
6143	Tb427-100005900	0	0.00990099	1.24421e-33	0.434181	4.9175	FALSE	5900.29	0.130575	0.878403	7.49819	3.31253e-32	Tb427_100005900	FALSE	undetected	undetected
2267	Tb427-030055700	0	0.00990099	1.24877e-33	0.881881	4.93499	FALSE	7872.61	0.197802	0.815445	3.31037	3.31558e-32	Tb427_030055700	FALSE	undetected	undetected
4823	Tb427-080038900	0	0.00990099	1.61638e-33	0.0730694	4.94246	FALSE	3749.13	0.0701415	0.933508	20.1359	4.24508e-32	Tb427_080038900	FALSE	undetected	undetected
4467	Tb427-070080800	0	0.00990099	1.79842e-33	0.156622	4.92034	FALSE	6843.48	0.158384	0.855105	4.2238	4.71041e-32	Tb427_070080800	FALSE	undetected	undetected
2760	Tb427-040050900	0	0.00990099	1.84344e-33	0.946983	4.42555	FALSE	10834.9	0.325039	0.711649	1.9052	4.81531e-32	Tb427_040050900	FALSE	undetected	undetected
8941	Tb427-110135700	0	0.00990099	4.23747e-33	0.861157	4.89848	FALSE	6600.87	0.154834	0.856414	8.5378	1.09216e-31	Tb427_110135700	TRUE	undetected	undetected
1886	Tb427-030013900	0	0.00990099	5.25313e-33	0.935154	4.90828	FALSE	9050.14	0.243044	0.783639	2.74623	1.35035e-31	Tb427_030013900	TRUE	FALSE	undetected
4797	Tb427-080036300	0	0.00990099	9.59138e-33	0.72867	4.89801	FALSE	7803.31	0.19236	0.822775	3.28496	2.45251e-31	Tb427_080036300	FALSE	FALSE	undetected
3781	Tb427-070008300	0	0.00990099	1.56527e-32	0.241669	4.8899	FALSE	6651.46	0.151248	0.863089	3.16469	3.97094e-31	Tb427_070008300	TRUE	undetected	undetected
4654	Tb427-080021800	0	0.00990099	1.82595e-32	0.126782	4.97484	FALSE	5481.49	0.119305	0.887304	20.3694	4.62019e-31	Tb427_080021800	TRUE	TRUE	undetected
6517	Tb427-100044300	0	0.00990099	6.50082e-32	0.059992	4.92043	FALSE	9980.51	0.285684	0.747906	2.73613	1.61537e-30	Tb427_100044300	TRUE	TRUE	undetected
5120	Tb427-080069400	0	0.00990099	1.46121e-31	0.823085	4.76227	FALSE	8699.4	0.230904	0.789398	3.89187	3.59406e-30	Tb427_080069400	FALSE	undetected	undetected
7442	Tb427-100140900	0	0.00990099	2.48445e-31	0.320806	4.89908	FALSE	9718.59	0.274094	0.754581	3.01242	6.04945e-30	Tb427_100140900	TRUE	undetected	undetected
7905	Tb427-110023400	0	0.00990099	3.7853e-31	0.0301562	4.58231	FALSE	8174.06	0.209712	0.805759	3.11108	9.19382e-30	Tb427_110023400	FALSE	undetected	undetected
6589	Tb427-100051600	0	0.00990099	4.18333e-31	0.587276	4.42445	FALSE	13405.7	0.484238	0.591099	1.73556	1.01352e-29	Tb427_100051600	FALSE	TRUE	undetected
3098	Tb427-050033700	0	0.00990099	1.0381e-30	0.8394	4.9125	FALSE	7632.64	0.186595	0.829712	3.94667	2.49016e-29	Tb427_050033700	FALSE	TRUE	undetected
3123	Tb427-050036200	0	0.00990099	1.22422e-30	0.871746	4.96437	FALSE	8242.55	0.212616	0.806414	4.08835	2.91497e-29	Tb427_050036200	TRUE	undetected	undetected
4264	Tb427-070059400:pseudogene	0	0.00990099	1.47289e-30	0.240579	4.94777	FALSE	9456.44	0.259798	0.768325	3.05151	3.49848e-29	Tb427_070059400:pseudogene	FALSE	undetected	undetected
5525	Tb427-090028700	0	0.00990099	3.26706e-30	0.725321	4.93101	FALSE	6411.16	0.144842	0.865838	5.49479	7.66613e-29	Tb427_090028700	FALSE	undetected	undetected
9226	Tb427-110164800	0	0.00990099	3.74756e-30	0.413126	4.94931	FALSE	8886.09	0.237661	0.790445	3.56954	8.77237e-29	Tb427_110164800	TRUE	FALSE	undetected
2361	Tb427-040009800	0	0.00990099	6.15866e-30	0.341655	4.9164	FALSE	7157.93	0.16992	0.843325	4.19221	1.42784e-28	Tb427_040009800	FALSE	FALSE	undetected
9050	Tb427-110147000	0	0.00990099	8.18991e-30	0.643444	4.61173	FALSE	14204.3	0.539465	0.558115	1.89703	1.89423e-28	Tb427_110147000	FALSE	undetected	undetected
4456	Tb427-070079700	0	0.00990099	9.15627e-30	0.504494	4.93184	FALSE	7495.96	0.182344	0.834031	3.28696	2.10768e-28	Tb427_070079700	FALSE	undetected	undetected
4302	Tb427-070063200	0	0.00990099	1.67492e-29	0.745065	4.87089	FALSE	7386.96	0.17891	0.831152	2.75831	3.81921e-28	Tb427_070063200	TRUE	FALSE	undetected
8680	Tb427-110102600	0	0.00990099	2.47188e-29	0.980089	4.952	FALSE	4182.59	0.0806352	0.923691	12.1604	5.62323e-28	Tb427_110102600	FALSE	undetected	undetected
4972	Tb427-080054300	0	0.00990099	3.20377e-29	0.109966	4.91156	FALSE	6091.1	0.135187	0.873429	4.37575	7.25415e-28	Tb427_080054300	TRUE	undetected	undetected
2261	Tb427-030055100	0	0.00990099	4.30072e-29	0.63907	4.9315	FALSE	6631.27	0.15286	0.856937	6.73239	9.67013e-28	Tb427_030055100	FALSE	undetected	undetected
5632	Tb427-090039700	0	0.00990099	5.69435e-29	0.431207	4.95086	FALSE	5115.7	0.106904	0.901571	14.2931	1.27152e-27	Tb427_090039700	FALSE	undetected	undetected
6266	Tb427-100018300	0	0.00990099	2.19704e-28	0.958479	4.92716	FALSE	6871.73	0.160362	0.85	4.41834	4.86107e-27	Tb427_100018300	FALSE	FALSE	undetected
9392	Tb427-110181700	0	0.00990099	4.16269e-28	0.584169	4.82805	FALSE	10071.4	0.2869	0.744764	2.04894	9.1892e-27	Tb427_110181700	FALSE	FALSE	undetected
7790	Tb427-110011700	0	0.00990099	5.097e-28	0.248375	4.29199	FALSE	12610	0.43	0.627618	1.79343	1.11501e-26	Tb427_110011700	FALSE	undetected	undetected
2936	Tb427-050016600	0	0.00990099	8.42749e-28	0.941042	4.93093	FALSE	8818.79	0.232336	0.790314	3.48838	1.82709e-26	Tb427_050016600	TRUE	FALSE	undetected
5578	Tb427-090034100	0	0.00990099	1.11653e-27	0.808482	4.31497	FALSE	8628.05	0.226406	0.789921	2.70359	2.41524e-26	Tb427_090034100	TRUE	TRUE	undetected
5941	Tb427-090071900	0	0.00990099	1.2088e-27	0.926506	4.80135	FALSE	6972.99	0.1611	0.851047	2.79647	2.60902e-26	Tb427_090071900	TRUE	FALSE	undetected
1641	Tb427-020017400	0	0.00990099	1.50374e-27	0.480033	4.94903	FALSE	5936.35	0.129071	0.87945	5.93485	3.2312e-26	Tb427_020017400	FALSE	TRUE	undetected
7950	Tb427-110028000	0	0.00990099	2.19661e-27	0.255352	4.92986	FALSE	4439.33	0.0861537	0.918848	8.97025	4.6992e-26	Tb427_110028000	TRUE	undetected	undetected
3520	Tb427-060032700	0	0.00990099	3.55825e-27	0.762369	4.93231	FALSE	7529.22	0.181667	0.835733	2.93404	7.54551e-26	Tb427_060032700	FALSE	FALSE	undetected
6572	Tb427-100049900	0	0.00990099	3.72414e-27	0.969046	4.59483	FALSE	9261.84	0.251929	0.774346	2.99946	7.88006e-26	Tb427_100049900	FALSE	undetected	undetected
8229	Tb427-110056400	0	0.00990099	4.37973e-27	0.375625	4.94079	FALSE	5647.26	0.121555	0.885995	8.64817	9.22926e-26	Tb427_110056400	FALSE	FALSE	undetected
5693	Tb427-090046100	0	0.00990099	4.38083e-27	0.451135	4.90387	FALSE	4557.03	0.091286	0.913874	10.4477	9.22926e-26	Tb427_090046100	FALSE	undetected	undetected
6463	Tb427-100038900	0	0.00990099	4.4462e-27	0.754825	4.44364	FALSE	4909.54	0.0996013	0.901571	4.23887	9.34667e-26	Tb427_100038900	FALSE	undetected	undetected
1332	Tb427-010011200	0	0.00990099	4.86623e-27	0.0390747	4.72203	FALSE	5180.64	0.106421	0.896073	2.94009	1.02075e-25	Tb427_010011200	TRUE	undetected	undetected
2634	Tb427-040037500	0	0.00990099	1.18949e-26	0.908952	4.89098	FALSE	8662.26	0.226166	0.796859	2.80446	2.47368e-25	Tb427_040037500	FALSE	undetected	undetected
8517	Tb427-110085200	0	0.00990099	1.21295e-26	0.582811	4.81427	FALSE	10232.4	0.296265	0.738482	3.01045	2.51707e-25	Tb427_110085200	TRUE	undetected	undetected
8168	Tb427-110050200	0	0.00990099	1.68515e-26	0.269254	4.91755	FALSE	9716.05	0.274356	0.756806	2.77143	3.45992e-25	Tb427_110050200	TRUE	TRUE	undetected
8958	Tb427-110137500	0	0.00990099	7.32244e-26	0.948467	4.34447	FALSE	7854.03	0.195201	0.816623	3.05515	1.48767e-24	Tb427_110137500	FALSE	undetected	undetected
2775	Tb427-040052400	0	0.00990099	1.99863e-25	0.0452204	4.6244	FALSE	13294.7	0.470775	0.605628	1.60972	4.03515e-24	Tb427_040052400	TRUE	undetected	undetected
3577	Tb427-060038400	0	0.00990099	3.70263e-25	0.829555	4.89294	FALSE	6310.24	0.141461	0.866492	6.19719	7.44444e-24	Tb427_060038400	TRUE	FALSE	undetected
7000	Tb427-100094900	0	0.00990099	5.94592e-25	0.318258	4.9175	FALSE	6988.51	0.163638	0.848037	4.7511	1.1832e-23	Tb427_100094900	FALSE	undetected	undetected
6391	Tb427-100031200	0	0.00990099	1.28289e-24	0.267486	4.9003	FALSE	6805.36	0.158019	0.852356	4.47351	2.52692e-23	Tb427_100031200	TRUE	TRUE	undetected
1368	Tb427-010014800	0	0.00990099	1.56786e-24	0.947555	4.58302	FALSE	10146	0.291609	0.739136	2.45728	3.06951e-23	Tb427_010014800	TRUE	FALSE	undetected
6534	Tb427-100046000	0	0.00990099	1.57813e-24	0.200876	4.92671	FALSE	9409.39	0.259384	0.763874	2.846	3.0834e-23	Tb427_100046000	FALSE	FALSE	undetected
1314	Tb427-010009400	0	0.00990099	2.33404e-24	0.988177	4.89981	FALSE	6919.48	0.16225	0.85144	4.19906	4.53289e-23	Tb427_010009400	FALSE	FALSE	undetected
4455	Tb427-070079600	0	0.00990099	6.16307e-24	0.487388	4.88458	FALSE	6693.71	0.154201	0.857853	4.93243	1.17571e-22	Tb427_070079600	FALSE	undetected	undetected
4199	Tb427-070052900	0	0.00990099	1.07383e-23	0.989792	4.92325	FALSE	12449.7	0.412338	0.652618	1.73485	2.03252e-22	Tb427_070052900	FALSE	undetected	undetected
3420	Tb427-060020000	0	0.00990099	1.52934e-23	0.779166	4.71009	FALSE	5302.6	0.110302	0.892932	5.18771	2.87783e-22	Tb427_060020000	TRUE	undetected	undetected
3619	Tb427-060042600	0	0.00990099	2.32997e-23	0.850428	4.64902	FALSE	5262.18	0.108704	0.895026	3.51118	4.35902e-22	Tb427_060042600	FALSE	TRUE	undetected
6247	Tb427-100016400	0	0.00990099	2.47722e-23	0.687291	4.95299	FALSE	6695.72	0.153616	0.85733	4.87655	4.62558e-22	Tb427_100016400	TRUE	undetected	undetected
5387	Tb427-090013700	0	0.00990099	5.29045e-23	0.884108	4.83025	FALSE	8024.87	0.20042	0.818325	2.88926	9.82179e-22	Tb427_090013700	TRUE	FALSE	undetected
1513	Tb427-010032000	0	0.00990099	5.32562e-23	0.159361	4.90994	FALSE	5763.08	0.123815	0.88377	5.80134	9.86817e-22	Tb427_010032000	TRUE	undetected	undetected
9384	Tb427-110180800	0	0.00990099	6.02018e-23	0.211106	4.82761	FALSE	7334.66	0.175952	0.839136	3.52456	1.11127e-21	Tb427_110180800	TRUE	undetected	undetected
4880	Tb427-080044700	0	0.00990099	6.42275e-23	0.0581044	4.34931	FALSE	8339.05	0.213221	0.799084	2.06106	1.18333e-21	Tb427_080044700	TRUE	FALSE	undetected
2600	Tb427-040033700	0	0.00990099	7.41686e-23	0.598289	4.89216	FALSE	5255.52	0.108526	0.897382	6.89565	1.36389e-21	Tb427_040033700	TRUE	undetected	undetected
6640	Tb427-100056700	0	0.00990099	7.60178e-23	0.80899	4.90002	FALSE	7354.95	0.175861	0.834948	4.17413	1.39524e-21	Tb427_100056700	TRUE	undetected	undetected
6818	Tb427-100076000	0	0.00990099	8.38462e-23	0.224227	4.95939	FALSE	4607.16	0.0896446	0.914529	6.38282	1.53602e-21	Tb427_100076000	TRUE	undetected	undetected
4906	Tb427-080047300	0	0.00990099	1.08661e-22	0.25073	4.67772	FALSE	6654.14	0.152038	0.856152	3.7536	1.98685e-21	Tb427_080047300	TRUE	TRUE	undetected
6704	Tb427-100063200	0	0.00990099	1.2121e-22	0.279889	4.89411	FALSE	11349	0.352033	0.697906	2.3758	2.21215e-21	Tb427_100063200	FALSE	FALSE	undetected
5518	Tb427-090028000	0	0.00990099	1.34079e-22	0.613818	4.61773	FALSE	3661.76	0.065992	0.936649	7.49461	2.43782e-21	Tb427_090028000	FALSE	FALSE	undetected
4862	Tb427-080042900	0	0.00990099	1.6611e-22	0.491067	4.77468	FALSE	9952.86	0.282162	0.746728	2.23198	3.00893e-21	Tb427_080042900	FALSE	TRUE	undetected
7691	Tb427-100168500	0	0.00990099	1.92772e-22	0.875179	4.74288	FALSE	6651.05	0.152342	0.857199	4.60597	3.48536e-21	Tb427_100168500	FALSE	undetected	undetected
6763	Tb427-100069300	0	0.00990099	2.0252e-22	0.123167	4.21284	FALSE	10637.1	0.317519	0.712827	2.06124	3.65479e-21	Tb427_100069300	FALSE	FALSE	undetected
2418	Tb427-040015500	0	0.00990099	2.02964e-22	0.916734	4.88752	FALSE	7355.79	0.177128	0.835471	3.80317	3.656e-21	Tb427_040015500	FALSE	undetected	undetected
3585	Tb427-060039200	0	0.00990099	2.25835e-22	0.816509	4.79738	FALSE	6116.63	0.13505	0.871466	5.54299	4.05291e-21	Tb427_060039200	TRUE	undetected	undetected
4231	Tb427-070056100	0	0.00990099	3.25789e-22	0.812534	4.8432	FALSE	8464.7	0.220227	0.79267	2.40692	5.8144e-21	Tb427_070056100	TRUE	undetected	undetected
1767	Tb427-020030100	0	0.00990099	4.14038e-22	0.480917	4.55046	FALSE	8567.18	0.222309	0.794895	2.81118	7.3488e-21	Tb427_020030100	FALSE	FALSE	undetected
2989	Tb427-050022200	0	0.00990099	4.20711e-22	0.679214	4.86407	FALSE	8956.07	0.237881	0.780497	1.98405	7.45359e-21	Tb427_050022200	FALSE	undetected	undetected
2274	Tb427-030056400	0	0.00990099	5.04924e-22	0.43285	4.72886	FALSE	7684.28	0.186456	0.827225	2.76343	8.89676e-21	Tb427_030056400	FALSE	FALSE	undetected
9294	Tb427-110171600	0	0.00990099	6.55068e-22	0.776796	4.24459	FALSE	8133.56	0.204502	0.808639	2.57123	1.14797e-20	Tb427_110171600	FALSE	FALSE	undetected
6034	Tb427-090082700	0	0.00990099	6.93558e-22	0.704505	4.79798	FALSE	13473.3	0.489098	0.58678	1.67159	1.21323e-20	Tb427_090082700	FALSE	undetected	undetected
1647	Tb427-020018000	0	0.00990099	7.82101e-22	0.249436	4.91683	FALSE	8036.84	0.202015	0.811911	4.12653	1.36319e-20	Tb427_020018000	FALSE	undetected	undetected
1836	Tb427-030008900	0	0.00990099	8.1713e-22	0.466169	4.75762	FALSE	8137.2	0.203909	0.81322	2.47954	1.42169e-20	Tb427_030008900	FALSE	undetected	undetected
4207	Tb427-070053700	0	0.00990099	8.46381e-22	0.573149	4.86623	FALSE	4898.87	0.0974836	0.908377	4.11433	1.46994e-20	Tb427_070053700	TRUE	undetected	undetected
3268	Tb427-050052300	0	0.00990099	1.12316e-21	0.342741	4.86201	FALSE	3819.49	0.0698031	0.934031	6.97833	1.92988e-20	Tb427_050052300	FALSE	undetected	undetected
9058	Tb427-110147800	0	0.00990099	1.78097e-21	0.628898	4.39431	FALSE	9238.85	0.252115	0.766099	2.357	3.03862e-20	Tb427_110147800	FALSE	TRUE	undetected
7275	Tb427-100124100	0	0.00990099	3.32545e-21	0.475025	4.59854	FALSE	9234.4	0.250475	0.769503	2.68526	5.66378e-20	Tb427_100124100	FALSE	undetected	undetected
5516	Tb427-090027800	0	0.00990099	8.27722e-21	0.28788	4.53087	FALSE	7926.78	0.197935	0.815707	3.07687	1.3999e-19	Tb427_090027800	FALSE	FALSE	undetected
3245	Tb427-050048400	0	0.00990099	1.04978e-20	0.917	4.67083	FALSE	8141.9	0.205145	0.808246	2.37643	1.76929e-19	Tb427_050048400	TRUE	undetected	undetected
2770	Tb427-040051900	0	0.00990099	1.21365e-20	0.226708	4.7411	FALSE	6241.82	0.138541	0.872906	3.47406	2.03838e-19	Tb427_040051900	FALSE	undetected	undetected
6842	Tb427-100078400	0	0.00990099	1.64047e-20	0.0982644	4.70463	FALSE	8336.8	0.212904	0.801309	1.95001	2.73158e-19	Tb427_100078400	FALSE	TRUE	undetected
8907	Tb427-110132300	0	0.00990099	2.32525e-20	0.135379	4.72008	FALSE	6831.45	0.155988	0.855105	2.49939	3.85196e-19	Tb427_110132300	TRUE	FALSE	undetected
8117	Tb427-110045000	0	0.00990099	2.86929e-20	0.344689	4.75904	FALSE	6687.4	0.152049	0.856414	3.77043	4.73702e-19	Tb427_110045000	FALSE	undetected	undetected
8750	Tb427-110109800	0	0.00990099	3.46568e-20	0.474716	4.31631	FALSE	10637.8	0.316199	0.714398	1.58103	5.71189e-19	Tb427_110109800	FALSE	FALSE	undetected
8313	Tb427-110064800	0	0.00990099	4.13148e-20	0.252384	4.86756	FALSE	5266.91	0.108623	0.898429	4.11295	6.78614e-19	Tb427_110064800	TRUE	undetected	undetected
4415	Tb427-070075000	0	0.00990099	4.40626e-20	0.294807	4.78476	FALSE	7928.41	0.196321	0.818586	3.06328	7.22523e-19	Tb427_070075000	TRUE	undetected	undetected
9154	Tb427-110157600	0	0.00990099	8.70006e-20	0.846198	4.79486	FALSE	6607.87	0.150445	0.85733	4.08624	1.40755e-18	Tb427_110157600	FALSE	TRUE	undetected
8792	Tb427-110120500	0	0.00990099	1.28242e-19	0.0211758	4.4756	FALSE	6700.48	0.152985	0.853534	3.25372	2.06788e-18	Tb427_110120500	TRUE	TRUE	undetected
1631	Tb427-020016400	0	0.00990099	1.29916e-19	0.543768	4.3472	FALSE	11964.4	0.387531	0.665314	2.02187	2.09139e-18	Tb427_020016400	FALSE	FALSE	undetected
4471	Tb427-070081200	0	0.00990099	1.7051e-19	0.864459	4.64373	FALSE	13580.6	0.492211	0.589136	1.66687	2.72675e-18	Tb427_070081200	FALSE	undetected	undetected
6320	Tb427-100023700:pseudogene	0	0.00990099	1.91149e-19	0.733058	4.67196	FALSE	12456.9	0.414887	0.64555	1.83418	3.04675e-18	Tb427_100023700:pseudogene	FALSE	undetected	undetected
[truncated: 827 more rows]

## Sheet: Phase peak per gene
Average expression of each CCR gene across cell for each phase (Early G1, Late G1, S and G2M). The phase with highest average expression is indicated in coloum "peak phase"
[truncated: 1,551 more rows]

[truncated: 3 more sheets: Dataset comparisons, Crozier comparison, Benz comparison]
