# Supplementary material for: Profiling the bloodstream form and procyclic form Trypanosoma brucei cell cycle using single-cell transcriptomics
Source: eLife. 2023 May 11;12:e86325. doi: 10.7554/eLife.86325 (PMC10212563; doi:10.7554/eLife.86325)
Supplement: Supplementary file 5. — (Tab 1) PseudotimeDE analysis. (Tab 2) PseudotimeDE results for CCR genes only. (Tab 3) Average expression of each CCR per phase. (Tab 4) Comparison with Crozier proteomics study. (Tab 5) Comparison with Benz proteomics study. [file elife-86325-supp5.xlsx]

## Sheet: BSF_DE_log_all_stats
DE analysis of genes across pseudotime infereacne of the BSF cell cycle.
CCR selected based on meanlogFC (>1.5) and BHadjusted p-value <0.01.
"Archer et al CCR" indicated whether genes where identidied in previously bulk RNA-seq analysis.
order	gene	fix.pv	emp.pv	para.pv	ad.pv	rank	zinf	aic	expv.mean	expv.zero	meanlogFC	BHadjust.pvalue
7166	Tb427-100112400	0	0.00990099	1.68966e-241	0.637074	4.99443	FALSE	7313.05	0.66344	0.569171	43.1233	1.63863e-237
7165	Tb427-100112200	0	0.00990099	6.49257e-200	0.794069	4.98842	FALSE	4131.8	0.22571	0.800962	231.035	3.14825e-196
3562	Tb427-060036900	0	0.00990099	1.25998e-187	0.824735	4.99528	FALSE	7490.72	0.570881	0.593449	16.6916	4.07311e-184
9246	Tb427-110166800	0	0.00990099	9.00529e-167	0.786447	4.97954	FALSE	5159.44	0.328454	0.736601	18.8764	2.18333e-163
9273	Tb427-110169500	0	0.00990099	1.55632e-166	0.108008	4.95657	FALSE	9922.1	0.942982	0.359826	3.5504	3.01864e-163
4534	Tb427-080007400	0	0.00990099	3.88044e-147	0.674642	4.96894	FALSE	9245.19	0.826827	0.435868	3.8694	6.27209e-144
9105	Tb427-110152700	0	0.00990099	2.12819e-135	0.0577424	4.95236	FALSE	7359.89	0.521387	0.589556	5.29236	2.94845e-132
5107	Tb427-080068100	0	0.00990099	1.58781e-134	0.609266	4.96066	FALSE	8470.61	0.672193	0.496793	4.07825	1.92482e-131
8045	Tb427-110037600	0	0.00990099	1.22478e-130	0.441245	4.6974	FALSE	9877.17	0.92792	0.356619	3.25502	1.31977e-127
4901	Tb427-080046800	0	0.00990099	1.14125e-121	0.372279	4.94897	FALSE	9822.73	0.885151	0.408612	2.93735	1.10679e-118
9411	Tb427-110183600	0	0.00990099	7.82869e-119	0.575548	4.95214	FALSE	6109.12	0.381146	0.690105	17.0451	6.90206e-116
7002	Tb427-100095100	0	0.00990099	9.26442e-117	0.772604	4.93468	FALSE	8895.12	0.722659	0.469537	3.30007	7.4872e-114
8841	Tb427-110125400	0	0.00990099	1.75625e-116	0.197301	4.88721	FALSE	8699.47	0.695512	0.475034	3.12226	1.31016e-113
3706	Tb427-060051900	0	0.00990099	2.67432e-116	0.223839	4.96213	FALSE	5640.68	0.319205	0.733165	10.9405	1.85254e-113
5582	Tb427-090034500	0	0.00990099	1.18812e-114	0.357481	4.48782	FALSE	11002.6	1.23323	0.245534	2.43336	7.68162e-112
3111	Tb427-050035000	0	0.00990099	1.01352e-112	0.114184	4.90902	FALSE	7930	0.566533	0.549473	3.23281	5.714e-110
5154	Tb427-080072900	0	0.00990099	1.03417e-112	0.433893	4.87669	FALSE	8535.29	0.656957	0.504352	3.60989	5.714e-110
7558	Tb427-100153300	0	0.00990099	1.06055e-112	0.476617	4.92419	FALSE	6884.21	0.445063	0.631012	5.19861	5.714e-110
8457	Tb427-110079200	0	0.00990099	3.34455e-112	0.820921	4.92472	FALSE	7816.89	0.588627	0.558177	8.06868	1.70713e-109
7164	Tb427-100112000	0	0.00990099	2.60917e-109	0.336894	4.97746	FALSE	4169.57	0.231865	0.800046	161.628	1.26518e-106
4722	Tb427-080028700	0	0.00990099	3.95493e-108	0.371431	4.98779	FALSE	7536.34	0.533756	0.608337	17.5322	1.82643e-105
2177	Tb427-030046000	0	0.00990099	5.7977e-107	0.86947	4.91217	FALSE	5456.7	0.324418	0.724233	8.57799	2.55573e-104
2561	Tb427-040029800	0	0.00990099	4.84765e-106	0.726308	4.83476	FALSE	11331.2	1.24572	0.241182	2.01904	2.04402e-103
8370	Tb427-110070500	0	0.00990099	3.23837e-105	0.527601	4.98737	FALSE	5348	0.306354	0.741411	8.24877	1.30857e-102
1837	Tb427-030009000	0	0.00990099	2.12671e-103	0.136672	4.78857	FALSE	9281.5	0.766007	0.436097	2.30851	8.24995e-101
6340	Tb427-100026100	0	0.00990099	2.64214e-101	0.462797	4.8822	FALSE	7222.32	0.484819	0.608108	5.27089	9.85516e-99
1949	Tb427-030020200	0	0.00990099	2.84104e-99	0.63949	4.89452	FALSE	4967.44	0.266587	0.771415	14.5212	1.02046e-96
1488	Tb427-010029100	0	0.00990099	1.8016e-97	0.247536	4.74001	FALSE	10707.1	1.06749	0.310582	2.45975	6.23998e-95
2096	Tb427-030037700	0	0.00990099	1.81154e-95	0.938077	4.93521	FALSE	8265.85	0.61047	0.527485	6.4998	6.05804e-93
2282	Tb427-030057200	0	0.00990099	4.46464e-92	0.42466	4.90938	FALSE	5545.09	0.32694	0.718049	7.03526	1.44327e-89
7077	Tb427-100102600	0	0.00990099	7.707e-90	0.803859	4.90614	FALSE	8711.66	0.671366	0.491067	2.94473	2.41105e-87
9250	Tb427-110167200	0	0.00990099	2.88168e-85	0.860716	4.97357	FALSE	6953.05	0.438686	0.627577	4.31303	8.7333e-83
4217	Tb427-070054700	0	0.00990099	8.14503e-84	0.758226	4.87095	FALSE	6962.91	0.429249	0.635593	3.04732	2.39365e-81
4533	Tb427-080007300	0	0.00990099	1.1716e-83	0.497741	4.79935	FALSE	6388.29	0.377019	0.677508	3.78309	3.3418e-81
4558	Tb427-080009800	0	0.00990099	1.17972e-81	0.436912	4.99525	FALSE	4248.83	0.204318	0.826615	11.9524	3.26884e-79
4396	Tb427-070072900	0	0.00990099	1.37537e-81	0.788978	4.88753	FALSE	6460.75	0.398747	0.668117	4.74822	3.70511e-79
6203	Tb427-100011900	0	0.00990099	1.74841e-81	0.971512	4.91773	FALSE	6964.15	0.435626	0.646816	7.58312	4.58273e-79
7907	Tb427-110023600	0	0.00990099	2.14e-80	0.61568	4.98774	FALSE	4744.09	0.258284	0.775767	29.8695	5.4615e-78
9237	Tb427-110165900	0	0.00990099	1.77387e-76	0.197538	4.9027	FALSE	8439.5	0.626076	0.536418	7.00678	4.41101e-74
4632	Tb427-080019600	0	0.00990099	9.2807e-76	0.905742	4.85476	FALSE	5037.6	0.265582	0.770041	8.77333	2.25011e-73
7243	Tb427-100120400	0	0.00990099	1.24737e-74	0.687822	4.90639	FALSE	6262.82	0.359694	0.695144	7.37005	2.95048e-72
8521	Tb427-110085600	0	0.00990099	3.637e-74	0.764088	4.92587	FALSE	5655.16	0.310624	0.726065	14.4853	8.39801e-72
7020	Tb427-100096900	0	0.00990099	5.07029e-74	0.0692441	4.96119	FALSE	3734.95	0.18202	0.838983	31.419	1.14353e-71
4837	Tb427-080040400	0	0.00990099	7.15948e-74	0.804055	4.96935	FALSE	4354.45	0.214133	0.813101	15.4115	1.57802e-71
7012	Tb427-100096100	0	0.00990099	3.74938e-72	0.700396	4.92911	FALSE	6796.33	0.421456	0.647045	4.78003	8.08033e-70
1831	Tb427-030008400	0	0.00990099	1.7135e-71	0.545075	4.92242	FALSE	3978.35	0.199818	0.82524	64.6966	3.61251e-69
3793	Tb427-070009500	0	0.00990099	2.27879e-71	0.650684	4.98479	FALSE	3980.49	0.196579	0.826386	25.6193	4.70206e-69
7019	Tb427-100096800	0	0.00990099	8.56213e-71	0.796753	4.94378	FALSE	3415.29	0.15081	0.864636	28.6742	1.72991e-68
4016	Tb427-070034600	0	0.00990099	1.18352e-70	0.988909	4.95098	FALSE	4615.94	0.24935	0.78241	23.2677	2.3424e-68
7018	Tb427-100096700	0	0.00990099	6.51078e-70	0.619898	4.96999	FALSE	3753.6	0.169765	0.848603	10.2302	1.26283e-67
2755	Tb427-040050400	0	0.00990099	9.31293e-70	0.982471	4.83758	FALSE	4784.74	0.239112	0.784242	7.96476	1.77092e-67
6058	Tb427-090085100	0	0.00990099	1.65181e-68	0.672908	4.93726	FALSE	4979.75	0.280103	0.756299	42.5361	3.08062e-66
7630	Tb427-100161200	0	0.00990099	5.29184e-68	0.933226	4.92408	FALSE	10154.3	0.942547	0.350435	2.45322	9.68307e-66
1391	Tb427-010017400	0	0.00990099	6.32311e-68	0.767333	3.3146	FALSE	12796.1	1.90836	0.0936784	1.57199	1.13558e-65
4275	Tb427-070060500	0	0.00990099	7.65055e-67	0.769035	4.96752	FALSE	2952.17	0.122988	0.888456	28.6151	1.349e-64
7374	Tb427-100134100	0	0.00990099	1.08532e-66	0.178926	4.80217	FALSE	6231.92	0.358358	0.693999	4.10187	1.87954e-64
9187	Tb427-110160900	0	0.00990099	6.81207e-66	0.836248	4.41047	FALSE	7987.21	0.543935	0.55749	2.89255	1.15901e-63
1588	Tb427-020011800	0	0.00990099	1.54829e-64	0.117126	4.90611	FALSE	9964.91	0.89751	0.376775	2.35161	2.58886e-62
3104	Tb427-050034300	0	0.00990099	1.94948e-63	0.838909	4.95634	FALSE	3411.61	0.137356	0.878149	12.8905	3.20441e-61
4980	Tb427-080055400	0	0.00990099	2.95628e-63	0.894946	4.82907	FALSE	3097.73	0.127975	0.878378	13.8359	4.77833e-61
7557	Tb427-100153200	0	0.00990099	4.48893e-63	0.727317	4.86593	FALSE	7992.14	0.557246	0.551077	3.01752	7.13666e-61
8216	Tb427-110055100	0	0.00990099	1.62822e-62	0.375982	4.67015	FALSE	7553.04	0.515419	0.587723	5.50705	2.54685e-60
6958	Tb427-100090100	0	0.00990099	5.8356e-62	0.821028	4.77608	FALSE	3186.49	0.137055	0.873339	30.9417	8.98313e-60
5495	Tb427-090025700	0	0.00990099	9.86767e-62	0.236416	4.54788	FALSE	6253.15	0.333275	0.706367	1.98557	1.49526e-59
4212	Tb427-070054200	0	0.00990099	1.00308e-61	0.184659	4.93975	FALSE	3223.25	0.140462	0.873798	43.3467	1.4966e-59
6169	Tb427-100008500	0	0.00990099	1.16434e-61	0.0506641	4.88995	FALSE	8213.64	0.57328	0.545579	3.57829	1.71087e-59
1975	Tb427-030022800	0	0.00990099	3.19347e-61	0.344012	4.90159	FALSE	6660.72	0.403301	0.653459	3.70995	4.62242e-59
4259	Tb427-070058900	0	0.00990099	1.08827e-59	0.917188	4.94931	FALSE	2988.11	0.120438	0.889372	26.9597	1.55206e-57
3267	Tb427-050052200	0	0.00990099	2.05328e-59	0.121695	4.83878	FALSE	7556.33	0.49611	0.597114	2.90033	2.8859e-57
2756	Tb427-040050500	0	0.00990099	2.25741e-59	0.528242	4.92309	FALSE	6907.15	0.429676	0.637884	3.83704	3.12748e-57
2898	Tb427-050012800	0	0.00990099	3.2341e-59	0.443762	4.89048	FALSE	12465.4	1.74555	0.117728	1.91622	4.4175e-57
8965	Tb427-110138200	0	0.00990099	8.08786e-59	0.82044	4.95676	FALSE	3541.56	0.157777	0.860055	20.6973	1.08939e-56
2940	Tb427-050017000	0	0.00990099	2.93145e-58	0.426645	4.57631	FALSE	6912.58	0.411487	0.651855	3.41089	3.89441e-56
5793	Tb427-090056100	0	0.00990099	3.20083e-58	0.118176	4.79493	FALSE	6686.46	0.402931	0.655291	3.25386	4.19482e-56
8517	Tb427-110085200	0	0.00990099	4.06042e-58	0.957094	4.89135	FALSE	6800.82	0.406026	0.669721	6.50503	5.25039e-56
4302	Tb427-070063200	0	0.00990099	4.45414e-58	0.746476	4.93764	FALSE	3433.53	0.14409	0.864865	8.45655	5.68372e-56
4617	Tb427-080017800	0	0.00990099	1.30359e-57	0.375142	4.92416	FALSE	7726.63	0.521583	0.577416	3.01111	1.64184e-55
2178	Tb427-030046300	0	0.00990099	1.3334e-57	0.776959	4.41355	FALSE	3504.06	0.138746	0.865094	3.50099	1.65786e-55
7808	Tb427-110013600	0	0.00990099	2.28144e-57	0.179777	4.97124	FALSE	5219.4	0.270058	0.758818	5.46666	2.80069e-55
2796	Tb427-040054500	0	0.00990099	1.56669e-56	0.998283	4.90374	FALSE	3873.31	0.174452	0.837838	9.63303	1.89922e-54
6807	Tb427-100074000	0	0.00990099	1.03214e-55	0.763108	4.93911	FALSE	6047.92	0.33584	0.708887	4.91066	1.23576e-53
2980	Tb427-050021300	0	0.00990099	1.16777e-55	0.392818	4.93858	FALSE	4729.28	0.232052	0.791571	25.6511	1.3811e-53
3898	Tb427-070020200	0	0.00990099	1.48987e-55	0.060202	4.96597	FALSE	3456.63	0.145718	0.867155	13.426	1.74082e-53
4577	Tb427-080011700	0	0.00990099	1.31625e-54	0.1089	4.86546	FALSE	4258.18	0.199756	0.815392	9.60372	1.51964e-52
6249	Tb427-100016600:pseudogene	0	0.00990099	5.40574e-54	0.877586	4.91599	FALSE	2839.19	0.111699	0.895328	30.3265	6.16763e-52
9104	Tb427-110152600	0	0.00990099	5.64114e-54	0.930328	4.90688	FALSE	3717.46	0.151113	0.855703	4.75016	6.36136e-52
8490	Tb427-110082500	0	0.00990099	8.39106e-54	0.098837	4.96158	FALSE	6015.83	0.333593	0.710032	4.97725	9.35363e-52
9079	Tb427-110150100	0	0.00990099	1.02275e-53	0.895027	4.87595	FALSE	8973.54	0.676179	0.487861	1.97862	1.12712e-51
7904	Tb427-110023300	0	0.00990099	1.12385e-52	0.921207	4.94286	FALSE	3771.01	0.163319	0.847	14.8204	1.22462e-50
3616	Tb427-060042300	0	0.00990099	2.38838e-52	0.135632	4.85776	FALSE	9329.71	0.749087	0.438617	3.26923	2.57361e-50
5530	Tb427-090029200	0	0.00990099	6.37695e-52	0.315287	4.7844	FALSE	4308.15	0.195115	0.822492	9.48501	6.79601e-50
1408	Tb427-010020200	0	0.00990099	8.07178e-52	0.26185	4.64246	FALSE	8034.12	0.551889	0.555199	2.58404	8.50871e-50
1856	Tb427-030010900	0	0.00990099	1.21382e-51	0.468886	4.27342	FALSE	11901	1.52527	0.1459	1.62275	1.26576e-49
7897	Tb427-110022600	0	0.00990099	2.75483e-51	0.190008	4.97373	FALSE	3616.14	0.164664	0.849061	35.7428	2.84216e-49
9083	Tb427-110150500	0	0.00990099	6.64582e-51	0.659749	4.8606	FALSE	11057.9	1.10824	0.310353	2.01161	6.78433e-49
7814	Tb427-110014200	0	0.00990099	1.04318e-50	0.347727	4.98	FALSE	4757.84	0.228494	0.799817	8.12	1.05383e-48
4356	Tb427-070068800	0	0.00990099	4.51378e-50	0.463946	4.9395	FALSE	3977.23	0.172365	0.842877	6.87141	4.51285e-48
1782	Tb427-020031600	0	0.00990099	1.0449e-49	0.17128	4.31366	FALSE	12376.6	1.67523	0.128264	1.3878	1.02358e-47
1787	Tb427-020032100	0	0.00990099	1.0391e-49	0.209286	4.64987	FALSE	7173.99	0.439096	0.635135	3.53327	1.02358e-47
1934	Tb427-030018700	0	0.00990099	1.14898e-49	0.557192	4.74206	FALSE	6092.26	0.340036	0.702703	4.23889	1.11428e-47
7709	Tb427-100170300	0	0.00990099	5.13451e-49	0.474042	4.95086	FALSE	1875.17	0.0697631	0.935181	93.9375	4.93015e-47
6462	Tb427-100038800	0	0.00990099	5.41307e-49	0.636453	4.8918	FALSE	6213.14	0.346379	0.707284	4.54862	5.14666e-47
4390	Tb427-070072300	0	0.00990099	3.28366e-48	0.657374	4.82942	FALSE	6089.9	0.338335	0.703161	4.80396	3.09174e-46
6484	Tb427-100041000	0	0.00990099	3.61893e-48	0.740675	4.85137	FALSE	6147.15	0.339792	0.704764	3.45758	3.37465e-46
3656	Tb427-060046300	0	0.00990099	8.14581e-48	0.906951	3.4118	FALSE	13108.4	2.33117	0.0384792	1.18674	7.52363e-46
8802	Tb427-110121500	0	0.00990099	2.12675e-47	0.153505	4.80133	FALSE	5333.4	0.269579	0.765918	3.69068	1.94578e-45
4535	Tb427-080007500	0	0.00990099	2.25267e-46	0.947593	4.9231	FALSE	9173.7	0.703917	0.486486	2.49306	2.04171e-44
8280	Tb427-110061500	0	0.00990099	2.64273e-46	0.276136	4.79159	FALSE	3190.75	0.125574	0.881585	15.3462	2.37307e-44
4713	Tb427-080027800	0	0.00990099	3.53237e-46	0.240568	4.73928	FALSE	6564.07	0.375108	0.672698	3.23685	3.14284e-44
7832	Tb427-110016000	0	0.00990099	4.25479e-46	0.240686	4.94221	FALSE	5831.84	0.308199	0.730646	3.55825	3.75118e-44
8357	Tb427-110069200	0	0.00990099	5.45209e-46	0.736837	4.97293	FALSE	4257.21	0.196936	0.823408	14.844	4.76345e-44
1411	Tb427-010020500	0	0.00990099	7.9122e-46	0.235615	4.95706	FALSE	6285.28	0.341999	0.708658	3.92353	6.85112e-44
7092	Tb427-100104100	0	0.00990099	8.00145e-46	0.55555	4.92671	FALSE	3221.84	0.13392	0.874714	9.31791	6.86708e-44
5547	Tb427-090030900	0	0.00990099	8.8305e-46	0.115451	4.95523	FALSE	4503.56	0.208899	0.810811	10.9527	7.51212e-44
5903	Tb427-090067900	0	0.00990099	9.04699e-46	0.550883	4.75549	FALSE	2516.18	0.0864121	0.91617	4.92421	7.62937e-44
9247	Tb427-110166900	0	0.00990099	2.00568e-45	0.410159	4.86602	FALSE	3352.97	0.138114	0.868301	6.91856	1.67681e-43
8992	Tb427-110140900	0	0.00990099	4.05634e-45	0.347059	4.93999	FALSE	5738.19	0.298455	0.735227	3.75469	3.36225e-43
1741	Tb427-020027500	0	0.00990099	4.92603e-45	0.498491	4.87445	FALSE	5753.04	0.295011	0.73912	3.64974	4.04853e-43
1444	Tb427-010023900	0	0.00990099	7.28217e-45	0.597996	4.92414	FALSE	7072.01	0.423627	0.650023	2.9166	5.93466e-43
8137	Tb427-110047000	0	0.00990099	9.45661e-45	0.703695	4.8964	FALSE	4903.02	0.245058	0.781722	19.5923	7.64252e-43
4463	Tb427-070080400	0	0.00990099	1.86448e-44	0.389727	4.36349	FALSE	3150.29	0.11597	0.88754	4.50785	1.49436e-42
2571	Tb427-040030800	0	0.00990099	2.34378e-44	0.86079	4.67706	FALSE	4760.59	0.226982	0.7918	3.96692	1.86311e-42
4015	Tb427-070032700	0	0.00990099	2.422e-44	0.472259	4.91023	FALSE	3077.45	0.127098	0.878607	28.6034	1.90964e-42
6694	Tb427-100062200	0	0.00990099	5.35668e-44	0.911522	4.6801	FALSE	12832.1	2.01653	0.069858	1.32142	4.18945e-42
5411	Tb427-090016400	0	0.00990099	2.01017e-43	0.961619	4.85896	FALSE	4458.79	0.205895	0.808978	4.48339	1.55957e-41
3271	Tb427-050052600	0	0.00990099	2.27062e-43	0.761487	4.81517	FALSE	4113.27	0.183132	0.829821	5.10663	1.74766e-41
6747	Tb427-100067700	0	0.00990099	8.00565e-43	0.673851	4.95043	FALSE	4317.63	0.201494	0.816079	7.36237	6.11329e-41
5890	Tb427-090066200	0	0.00990099	1.0337e-42	0.771278	4.75382	FALSE	9343.55	0.718567	0.470912	2.36695	7.83193e-41
4361	Tb427-070069300	0	0.00990099	1.20756e-42	0.901157	4.77357	FALSE	4643.36	0.213284	0.802107	3.41007	9.07824e-41
3963	Tb427-070027500	0	0.00990099	5.28885e-42	0.065851	4.95517	FALSE	3221.97	0.127977	0.879753	12.7017	3.94548e-40
7829	Tb427-110015700	0	0.00990099	7.70227e-42	0.942535	4.63711	FALSE	9171.87	0.708368	0.474118	2.57326	5.70203e-40
6200	Tb427-100011600	0	0.00990099	1.23857e-41	0.80159	4.53447	FALSE	7924.96	0.522724	0.576958	2.15033	9.09976e-40
2477	Tb427-040021400	0	0.00990099	2.09488e-41	0.692456	4.96262	FALSE	7501.13	0.468265	0.61956	3.42363	1.52753e-39
3945	Tb427-070025700	0	0.00990099	8.11523e-41	0.890577	4.94707	FALSE	4544.51	0.219976	0.797526	12.2898	5.87325e-39
6199	Tb427-100011500	0	0.00990099	1.00846e-40	0.0534787	4.80421	FALSE	5313.57	0.265172	0.761109	3.81411	7.24445e-39
2697	Tb427-040044000	0	0.00990099	1.17443e-40	0.312729	4.64184	FALSE	3088.73	0.12349	0.882501	18.6009	8.37472e-39
6202	Tb427-100011800	0	0.00990099	1.55804e-40	0.74485	4.81155	FALSE	4653.78	0.214818	0.803023	5.60114	1.10291e-38
4056	Tb427-070038600	0	0.00990099	6.43032e-40	0.620393	4.55552	FALSE	8426.47	0.600773	0.524966	2.61811	4.51893e-38
7998	Tb427-110032800	0	0.00990099	6.85988e-40	0.769727	4.85691	FALSE	4772.23	0.222406	0.79432	3.83608	4.78612e-38
6093	Tb427-090088700	0	0.00990099	2.00496e-39	0.293651	4.87001	FALSE	2590.42	0.0947635	0.910902	17.9054	1.38887e-37
5186	Tb427-080076100	0	0.00990099	1.70046e-38	0.158732	4.69236	FALSE	5774.44	0.303908	0.728814	4.26241	1.16958e-36
1623	Tb427-020015600	0	0.00990099	4.24375e-38	0.962276	4.90432	FALSE	6046.23	0.319779	0.722171	3.03615	2.8983e-36
1715	Tb427-020024900	0	0.00990099	4.31416e-38	0.221415	4.87846	FALSE	2781.35	0.104986	0.901741	30.8457	2.92578e-36
5585	Tb427-090034800	0	0.00990099	6.19487e-38	0.996889	4.89864	FALSE	10001.1	0.878257	0.370133	2.33192	4.17207e-36
9343	Tb427-110176500	0	0.00990099	7.18859e-38	0.508267	4.82679	FALSE	3823.99	0.160448	0.846541	7.15691	4.80792e-36
2116	Tb427-030039700	0	0.00990099	9.07465e-38	0.5373	4.66599	FALSE	7634.09	0.493202	0.59803	3.50509	6.0278e-36
8641	Tb427-110098700	0	0.00990099	1.19667e-37	0.934088	4.89258	FALSE	4586.89	0.213201	0.802565	4.40581	7.89473e-36
5274	Tb427-080085400	0	0.00990099	1.3061e-37	0.266104	4.81301	FALSE	7840.15	0.514815	0.574668	2.38969	8.55851e-36
4161	Tb427-070049100	0	0.00990099	1.56852e-37	0.893899	4.66548	FALSE	2977.67	0.112743	0.892808	18.3984	1.02091e-35
4199	Tb427-070052900	0	0.00990099	1.63115e-37	0.901765	4.83328	FALSE	7144.3	0.423835	0.651626	3.88617	1.05459e-35
7596	Tb427-100157100	3.87676e-07	0.00990099	2.0667e-37	0.744109	4.005	FALSE	12875	2.17627	0.0409986	1.24085	1.32734e-35
6011	Tb427-090080400	0	0.00990099	2.08291e-37	0.905507	4.48389	FALSE	5440.4	0.272445	0.755612	2.93774	1.32895e-35
7973	Tb427-110030300	0	0.00990099	3.1026e-37	0.884861	3.0464	FALSE	6691.1	0.377109	0.67476	2.1962	1.9666e-35
8140	Tb427-110047300	0	0.00990099	3.57418e-37	0.179166	4.78143	FALSE	4552.49	0.202449	0.816079	6.52295	2.2508e-35
8492	Tb427-110082700	0	0.00990099	3.89422e-37	0.833224	4.77526	FALSE	4721.76	0.221215	0.795465	5.47416	2.43653e-35
5428	Tb427-090018600	0	0.00990099	4.47851e-37	0.819079	4.74329	FALSE	7243.97	0.448424	0.620934	2.61748	2.78414e-35
4880	Tb427-080044700	0	0.00990099	4.53931e-37	0.902357	4.3609	FALSE	4299.77	0.188588	0.825928	6.05863	2.80396e-35
2070	Tb427-030033600	0	0.00990099	4.70117e-37	0.731142	4.79411	FALSE	6471.57	0.371163	0.683234	3.20566	2.88557e-35
1553	Tb427-020008100	0	0.00990099	1.17421e-36	0.798285	4.62107	FALSE	7537.8	0.471421	0.619102	2.3795	7.16192e-35
5463	Tb427-090022100	0	0.00990099	1.77749e-36	0.782823	4.66589	FALSE	5149.54	0.253648	0.767064	3.46566	1.07738e-34
8546	Tb427-110088100	0	0.00990099	2.6182e-36	0.36441	4.80432	FALSE	4302.36	0.195576	0.818369	7.35001	1.5771e-34
7822	Tb427-110015000	0	0.00990099	3.04849e-36	0.756026	4.91352	FALSE	6081.51	0.344085	0.7082	6.63422	1.82496e-34
1387	Tb427-010016800	0	0.00990099	6.99511e-36	0.888046	4.95973	FALSE	9674.34	0.784943	0.431287	1.86218	4.16187e-34
4941	Tb427-080050800	0	0.00990099	8.18739e-36	0.911097	4.80054	FALSE	5938.52	0.315539	0.719423	2.81904	4.84155e-34
6032	Tb427-090082500	0	0.00990099	8.40666e-36	0.922917	4.34388	FALSE	8397.74	0.590179	0.527943	2.6503	4.94108e-34
2495	Tb427-040023200	0	0.00990099	1.29355e-35	0.867737	4.47685	FALSE	8388.75	0.5967	0.521072	2.66121	7.55716e-34
3566	Tb427-060037300	0	0.00990099	1.3374e-35	0.967075	4.88315	FALSE	4231.33	0.188691	0.829592	12.3795	7.76654e-34
8579	Tb427-110091400	0	0.00990099	2.66929e-35	0.585205	4.43013	FALSE	3922.31	0.167255	0.841961	4.04193	1.54088e-33
3627	Tb427-060043400	0	0.00990099	2.86679e-35	0.381525	4.28163	FALSE	10510.7	1.00452	0.309666	1.83246	1.6451e-33
3177	Tb427-050041600	0	0.00990099	3.34565e-35	0.601292	4.94323	FALSE	4582.1	0.213858	0.811269	7.81289	1.9086e-33
7397	Tb427-100136400	0	0.00990099	4.72397e-35	0.764094	4.63815	FALSE	3638.31	0.152504	0.853642	6.96242	2.67912e-33
2528	Tb427-040026500	0	0.00990099	4.78056e-35	0.524327	4.84236	FALSE	3993.83	0.168851	0.841044	9.56087	2.69546e-33
8971	Tb427-110138800	0	0.00990099	1.72054e-34	0.642657	4.82304	FALSE	7421.63	0.467363	0.609482	2.31503	9.64499e-33
7016	Tb427-100096500	0	0.00990099	3.45952e-34	0.310894	4.62605	FALSE	2783.25	0.104809	0.899908	15.8076	1.92818e-32
6389	Tb427-100031000	0	0.00990099	5.04332e-34	0.81671	4.57455	FALSE	7728.05	0.499999	0.586578	3.28973	2.79486e-32
8371	Tb427-110070600	0	0.00990099	9.56202e-34	0.585729	4.88896	FALSE	2841.97	0.105614	0.898305	8.87162	5.26889e-32
4843	Tb427-080041000	0	0.00990099	1.0657e-33	0.389719	4.86275	FALSE	5164.45	0.252874	0.771645	4.03381	5.83909e-32
1497	Tb427-010030000	0	0.00990099	1.08724e-33	0.714705	4.7857	FALSE	4295.59	0.184577	0.828676	5.07712	5.92361e-32
8563	Tb427-110089800	0	0.00990099	1.499e-33	0.673488	4.7697	FALSE	4496.75	0.201856	0.816995	5.27877	8.1214e-32
5164	Tb427-080073900	0	0.00990099	1.5988e-33	0.649524	4.58694	FALSE	9456.88	0.758192	0.431974	2.18051	8.61396e-32
4268	Tb427-070059800	0	0.00990099	1.74501e-33	0.405862	4.84296	FALSE	2567.98	0.094351	0.907009	10.5772	9.34979e-32
9445	Tb427-110187000	0	0.00990099	3.55021e-33	0.430635	4.34265	FALSE	4937.94	0.231083	0.789052	3.86078	1.89176e-31
5340	Tb427-090008000	0	0.00990099	6.63479e-33	0.699356	4.86674	FALSE	4217.89	0.183073	0.831654	5.95087	3.51608e-31
2245	Tb427-030053500	0	0.00990099	6.81594e-33	0.765902	4.79202	FALSE	4451.56	0.199042	0.810811	3.47937	3.59244e-31
4450	Tb427-070079100	0	0.00990099	7.69508e-33	0.303896	4.93919	FALSE	3187.58	0.124215	0.885021	19.3441	4.03388e-31
1967	Tb427-030022000	0	0.00990099	1.13653e-32	0.837588	3.64337	FALSE	10288.6	0.937559	0.343793	1.61903	5.92587e-31
1930	Tb427-030018300	0	0.00990099	2.44223e-32	0.844682	4.91513	FALSE	3583.51	0.142341	0.871278	8.15985	1.26656e-30
7387	Tb427-100135400	0	0.00990099	3.96416e-32	0.25203	4.66841	FALSE	8522.88	0.613801	0.508704	1.79329	2.04491e-30
3172	Tb427-050041100	0	0.00990099	5.41594e-32	0.326	4.85386	FALSE	2242.26	0.0801412	0.923729	28.0431	2.77904e-30
9356	Tb427-110178000	0	0.00990099	5.51552e-32	0.940324	4.38584	FALSE	9652.39	0.796117	0.413193	2.08399	2.81524e-30
6912	Tb427-100085500	0	0.00990099	6.91285e-32	0.0333929	4.85099	FALSE	5384.5	0.2642	0.770957	3.58264	3.50999e-30
4643	Tb427-080020700	0	0.00990099	7.62894e-32	0.808182	3.7926	FALSE	7582.16	0.47222	0.60994	2.13049	3.85341e-30
2122	Tb427-030040300	0	0.00990099	7.67131e-32	0.761575	4.93762	FALSE	10755.7	1.04135	0.309895	1.77863	3.85473e-30
6841	Tb427-100078300	0	0.00990099	9.18426e-32	0.975367	4.50133	FALSE	7726.55	0.496905	0.588639	1.90126	4.59118e-30
6677	Tb427-100060400	0	0.00990099	1.83863e-31	0.925928	4.28217	FALSE	13414	2.41423	0.037563	1.29942	9.14414e-30
8833	Tb427-110124600	0	0.00990099	2.43498e-31	0.583531	4.88159	FALSE	6865.77	0.400012	0.665598	3.63761	1.20482e-29
6204	Tb427-100012000	0	0.00990099	3.74393e-31	0.717844	4.85894	FALSE	5347.34	0.267312	0.763399	4.90267	1.84308e-29
5578	Tb427-090034100	0	0.00990099	5.21305e-31	0.934935	4.8147	FALSE	3990.71	0.170847	0.837838	4.18613	2.55334e-29
3529	Tb427-060033600	0	0.00990099	5.58127e-31	0.388188	4.60402	FALSE	5325.94	0.259768	0.770499	4.51565	2.71996e-29
8165	Tb427-110049900	0	0.00990099	6.19084e-31	0.207261	4.67539	FALSE	6356.48	0.352918	0.686899	2.49237	3.00194e-29
2454	Tb427-040019100	0	0.00990099	9.67521e-31	0.842356	3.86836	FALSE	5635.7	0.28515	0.742327	2.51822	4.66817e-29
5788	Tb427-090055600	0	0.00990099	1.25298e-30	0.946229	4.60745	FALSE	4081.19	0.180265	0.830508	6.56263	6.01555e-29
4892	Tb427-080045900	0	0.00990099	1.63612e-30	0.975543	4.4278	FALSE	5483.4	0.273727	0.751947	3.8674	7.81632e-29
1380	Tb427-010016100	0	0.00990099	2.12921e-30	0.0886671	4.7073	FALSE	6935.1	0.398578	0.663995	3.81327	1.01221e-28
4426	Tb427-070076700	0	0.00990099	2.69072e-30	0.695628	4.46622	FALSE	8188.72	0.558077	0.542144	1.73652	1.27291e-28
4784	Tb427-080035000	0	0.00990099	3.77417e-30	0.379123	4.91885	FALSE	3935.72	0.164032	0.849748	5.17073	1.77679e-28
7989	Tb427-110031900	0	0.00990099	6.43416e-30	0.856837	4.87297	FALSE	3093.23	0.126208	0.879524	16.4101	3.01442e-28
5830	Tb427-090059800	0	0.00990099	9.70547e-30	0.667446	4.63334	FALSE	4868.66	0.224392	0.795694	3.05906	4.52517e-28
4840	Tb427-080040700	0	0.00990099	1.44426e-29	0.748	4.52644	FALSE	6808.44	0.389916	0.668346	3.60182	6.70165e-28
7287	Tb427-100125300	0	0.00990099	1.45582e-29	0.969177	4.81419	FALSE	5081.64	0.243104	0.778516	3.46987	6.72314e-28
7790	Tb427-110011700	0	0.00990099	2.18749e-29	0.462379	4.55087	FALSE	6765.17	0.394929	0.652084	3.60953	1.00542e-27
8722	Tb427-110107000	0	0.00990099	2.65219e-29	0.919274	4.80664	FALSE	9275.45	0.73428	0.437929	1.79506	1.21325e-27
8564	Tb427-110089900	0	0.00990099	2.9539e-29	0.555619	4.41963	FALSE	3566.56	0.146321	0.85891	4.42891	1.34493e-27
8249	Tb427-110058400	0	0.00990099	3.054e-29	0.577342	4.60766	FALSE	3085.33	0.116376	0.889143	7.5607	1.384e-27
6319	Tb427-100023600	0	0.00990099	6.10577e-29	0.762587	4.57726	FALSE	12863.6	1.93284	0.0893266	1.23002	2.75413e-27
7678	Tb427-100167200	0	0.00990099	6.87638e-29	0.0709659	4.40816	FALSE	11038.6	1.11561	0.285158	1.98016	3.08737e-27
1586	Tb427-020011600	0	0.00990099	7.44272e-29	0.482552	4.91741	FALSE	8724.91	0.635502	0.505955	2.38977	3.32625e-27
8806	Tb427-110121900	0	0.00990099	8.1859e-29	0.251849	4.82998	FALSE	6877.94	0.399157	0.664453	2.69504	3.6416e-27
5812	Tb427-090058000	0	0.00990099	1.19425e-28	0.0907914	4.70723	FALSE	12348.6	1.58799	0.15552	1.37997	5.28851e-27
6896	Tb427-100083900	0	0.00990099	1.36546e-28	0.756826	4.82655	FALSE	2885.59	0.104219	0.900137	5.82769	6.01919e-27
8217	Tb427-110055200	0	0.00990099	1.38642e-28	0.669634	4.92008	FALSE	3282.45	0.127047	0.882272	9.68085	6.08392e-27
8368	Tb427-110070300	0	0.00990099	4.23685e-28	0.613096	4.71278	FALSE	4372.45	0.191846	0.82066	3.60704	1.85085e-26
5196	Tb427-080077100	0	0.00990099	4.48965e-28	0.557591	4.76419	FALSE	4004.91	0.172648	0.83967	12.5149	1.95249e-26
7400	Tb427-100136700	0	0.00990099	4.78053e-28	0.221434	4.81608	FALSE	3672.58	0.14864	0.860971	8.43915	2.06971e-26
7980	Tb427-110031000	0	0.00990099	6.42801e-28	0.179382	4.2317	FALSE	10503.5	1.00488	0.305314	2.00917	2.77062e-26
4861	Tb427-080042800	0	0.00990099	6.5895e-28	0.445223	4.83628	FALSE	4134.79	0.177593	0.833486	3.61264	2.82766e-26
2019	Tb427-030028500	0	0.00990099	8.83913e-28	0.747249	4.69796	FALSE	2673.1	0.0935292	0.910673	7.48796	3.7763e-26
5508	Tb427-090027000	0.00136387	0.00990099	1.23441e-27	0.455385	3.48789	FALSE	13616.3	2.82034	0.0130554	1.12694	5.25056e-26
5718	Tb427-090048600	0	0.00990099	1.7942e-27	0.556156	4.91833	FALSE	5568.37	0.281065	0.749198	2.82305	7.59832e-26
2659	Tb427-040040200	0	0.00990099	2.11953e-27	0.874965	4.13372	FALSE	7597.91	0.479533	0.59574	1.89927	8.93703e-26
6911	Tb427-100085400	0	0.00990099	2.41294e-27	0.253885	4.24741	FALSE	6121.18	0.327086	0.704993	2.05168	1.01302e-25
9276	Tb427-110169800	0	0.00990099	2.69747e-27	0.346494	4.33247	FALSE	4542.06	0.203215	0.806917	2.98023	1.12759e-25
2036	Tb427-030030200	0	0.00990099	3.27942e-27	0.409968	4.74504	FALSE	11161.2	1.14737	0.269125	1.39456	1.36497e-25
8870	Tb427-110128300	0	0.00990099	3.57735e-27	0.0178953	4.66809	FALSE	5437.25	0.268877	0.752634	2.60733	1.48261e-25
1844	Tb427-030009700	0	0.00990099	4.08411e-27	0.106246	4.73781	FALSE	3207.69	0.123868	0.885021	7.8053	1.68544e-25
4905	Tb427-080047200	0	0.00990099	4.24569e-27	0.93335	4.86015	FALSE	3740.37	0.151394	0.860513	13.893	1.74469e-25
2878	Tb427-050010800	0	0.00990099	6.6838e-27	0.154564	4.74772	FALSE	9490.27	0.755059	0.439533	2.76281	2.735e-25
1406	Tb427-010020000	0	0.00990099	9.19429e-27	0.325421	4.67325	FALSE	4437.22	0.200123	0.814475	3.58518	3.74648e-25
6767	Tb427-100069700	0	0.00990099	9.5881e-27	0.113348	4.82198	FALSE	7350.9	0.451152	0.61727	2.0356	3.8906e-25
9024	Tb427-110144100	0	0.00990099	1.02085e-26	0.777353	4.81459	FALSE	3813.04	0.154804	0.856848	5.27974	4.1251e-25
5367	Tb427-090011700	0	0.00990099	1.05994e-26	0.939548	4.71985	FALSE	2297.29	0.0810474	0.922355	31.6634	4.26525e-25
5660	Tb427-090042800	0	0.00990099	1.07356e-26	0.312587	4.65848	FALSE	4134.06	0.181111	0.827073	4.4607	4.30222e-25
4673	Tb427-080023700	0	0.00990099	1.50614e-26	0.898742	4.38403	FALSE	7907.65	0.516146	0.568484	2.07115	5.98627e-25
6859	Tb427-100080100	0	0.00990099	1.50114e-26	0.00716369	4.86218	FALSE	8005.76	0.526923	0.568942	1.6757	5.98627e-25
7379	Tb427-100134600	0	0.00990099	3.03289e-26	0.301698	4.29565	FALSE	4842.64	0.221178	0.794091	3.28727	1.20053e-24
3244	Tb427-050048300	0	0.00990099	3.07745e-26	0.658839	4.43933	FALSE	4105.19	0.173409	0.836464	2.95326	1.21322e-24
2416	Tb427-040015300	0	0.00990099	3.9834e-26	0.552742	3.34747	FALSE	12770.5	2.00691	0.0705451	1.30674	1.56401e-24
3721	Tb427-060053400	0	0.00990099	4.11452e-26	0.989213	4.38113	FALSE	3423.28	0.135037	0.871736	5.02705	1.60898e-24
4937	Tb427-080050400	0	0.00990099	5.74554e-26	0.424429	4.56464	FALSE	8250.07	0.555119	0.55497	2.50799	2.23776e-24
5090	Tb427-080066400	0	0.00990099	9.22755e-26	0.262507	4.73396	FALSE	3918.16	0.160688	0.850893	6.51392	3.57955e-24
4867	Tb427-080043400	0	0.00990099	9.61187e-26	0.899007	4.87626	FALSE	3962.77	0.164645	0.850206	9.45527	3.71378e-24
3121	Tb427-050036000	0	0.00990099	9.67788e-26	0.529384	4.7866	FALSE	4147.1	0.181929	0.828218	4.26023	3.72445e-24
8046	Tb427-110037700	0	0.00990099	1.16202e-25	0.541071	4.87302	FALSE	4351.78	0.19249	0.826157	5.58254	4.45426e-24
8672	Tb427-110101800	0	0.00990099	1.66167e-25	0.937511	4.49659	FALSE	6622.6	0.376848	0.672011	3.01908	6.34443e-24
5195	Tb427-080077000	0	0.00990099	1.7997e-25	0.226543	4.7689	FALSE	3118.1	0.120201	0.887769	9.42073	6.8445e-24
7015	Tb427-100096400	0.00130894	0.00990099	1.91179e-25	0.442557	3.28956	FALSE	13772.8	3.0564	0.00549702	1.16279	7.24238e-24
3617	Tb427-060042400	0	0.00990099	2.08622e-25	0.964087	4.48774	FALSE	8732.03	0.638378	0.50229	1.88719	7.87245e-24
8335	Tb427-110067000	0	0.00990099	2.10501e-25	0.640892	4.88675	FALSE	5326.22	0.259714	0.766835	5.8106	7.91257e-24
8403	Tb427-110073800	0	0.00990099	3.84086e-25	0.752898	4.72255	FALSE	8971.78	0.658985	0.497022	1.72963	1.43817e-23
1992	Tb427-030024500	0	0.00990099	4.68771e-25	0.496631	4.37779	FALSE	6184.34	0.338648	0.70568	2.88447	1.74852e-23
2413	Tb427-040015000	0	0.00990099	5.49241e-25	0.732352	4.71805	FALSE	7659.99	0.483664	0.607421	2.88337	2.04082e-23
8267	Tb427-110060200	0	0.00990099	7.22566e-25	0.567756	4.19759	FALSE	4901.33	0.226101	0.79432	3.9691	2.6746e-23
6463	Tb427-100038900	0	0.00990099	7.61564e-25	0.829044	4.7082	FALSE	2410.15	0.0874127	0.915025	15.5686	2.80823e-23
4391	Tb427-070072400	0	0.00990099	8.12415e-25	0.681789	4.33493	FALSE	6442.59	0.354302	0.685525	1.90259	2.9844e-23
1946	Tb427-030019900	0	0.00990099	8.6358e-25	0.418383	4.68771	FALSE	2698.28	0.100178	0.900596	7.37986	3.16038e-23
1840	Tb427-030009300	0	0.00990099	9.93585e-25	0.202594	4.64292	FALSE	2370.32	0.0812413	0.923042	11.0946	3.62248e-23
8253	Tb427-110058800	0	0.00990099	2.42082e-24	0.492462	4.68714	FALSE	4324.39	0.186605	0.822263	3.0121	8.79292e-23
4425	Tb427-070076600	0	0.00990099	2.6782e-24	0.588214	4.79531	FALSE	4879.73	0.225973	0.795923	4.22753	9.6915e-23
7391	Tb427-100135800	0	0.00990099	3.71311e-24	0.786733	4.76674	FALSE	3182.05	0.12267	0.881814	19.0677	1.33865e-22
5556	Tb427-090031800	0	0.00990099	3.7569e-24	0.219476	4.53771	FALSE	10058.5	0.833331	0.418461	1.65133	1.34942e-22
3589	Tb427-060039600	0	0.00990099	4.00258e-24	0.367038	4.90895	FALSE	2335.87	0.080772	0.922813	16.3034	1.43236e-22
4354	Tb427-070068600	0	0.00990099	4.37561e-24	0.740627	4.76056	FALSE	4533.7	0.202248	0.814017	3.38453	1.5601e-22
3320	Tb427-060009600	0	0.00990099	4.91258e-24	0.744707	3.46412	FALSE	6248.3	0.336941	0.701557	2.3692	1.74514e-22
7860	Tb427-110018800	0	0.00990099	5.36663e-24	0.442262	4.42155	FALSE	5957.31	0.313263	0.715987	2.21536	1.89947e-22
5952	Tb427-090073100	0	0.00990099	5.86489e-24	0.97625	4.52924	FALSE	9205.26	0.70409	0.461979	1.7865	2.06828e-22
2016	Tb427-030028200	0	0.00990099	8.39008e-24	0.594342	4.65923	FALSE	3015.88	0.109991	0.894182	7.499	2.94808e-22
7746	Tb427-110007300	0	0.00990099	1.01114e-23	0.172579	4.82984	FALSE	2961.14	0.108272	0.89716	9.3468	3.54007e-22
183	Tb427-000198100:pseudogene	0	0.00990099	1.10131e-23	0.650079	4.56497	FALSE	3053.85	0.117543	0.886624	11.0519	3.84189e-22
4730	Tb427-080029500	0	0.00990099	1.15152e-23	0.604332	4.23931	FALSE	7210.74	0.42851	0.641319	2.46753	4.00268e-22
2280	Tb427-030057000	0	0.00990099	1.37013e-23	0.705036	4.33237	FALSE	4466.34	0.198276	0.814017	2.82881	4.73163e-22
4523	Tb427-080006300	0	0.00990099	1.37099e-23	0.191638	4.84811	FALSE	4752.36	0.216345	0.804856	6.85004	4.73163e-22
2139	Tb427-030042000	0	0.00990099	1.41077e-23	0.78945	4.66059	FALSE	2600.92	0.093897	0.909757	8.79217	4.85164e-22
7103	Tb427-100105200	0	0.00990099	1.58399e-23	0.363446	4.8176	FALSE	3991.1	0.164613	0.846083	4.34136	5.42811e-22
2903	Tb427-050013300	0	0.00990099	1.62003e-23	0.127823	4.78548	FALSE	4723.3	0.218057	0.800962	4.79345	5.53206e-22
3808	Tb427-070011000	0	0.00990099	2.44596e-23	0.797696	4.64858	FALSE	6170.91	0.329184	0.70339	1.96605	8.32313e-22
7990	Tb427-110032000	0	0.00990099	2.99859e-23	0.780752	4.42229	FALSE	2278.86	0.0753369	0.926248	7.76404	1.01679e-21
8355	Tb427-110069000	0	0.00990099	5.72742e-23	0.917665	4.55348	FALSE	4917.55	0.226142	0.790655	2.47501	1.93535e-21
1625	Tb427-020015800	0	0.00990099	6.35926e-23	0.563879	4.71288	FALSE	3388.21	0.129786	0.88044	6.3214	2.14139e-21
43	Tb427-000015300	0	0.00990099	6.52133e-23	0.613269	4.63324	FALSE	8463.84	0.568671	0.56459	1.88773	2.18837e-21
1453	Tb427-010024800	0	0.00990099	8.65899e-23	0.635828	4.38768	FALSE	3658.82	0.144288	0.865094	5.31818	2.89569e-21
5338	Tb427-090007800	0	0.00990099	1.08706e-22	0.828815	4.84142	FALSE	2422.78	0.0839592	0.919835	17.0395	3.62277e-21
9045	Tb427-110146500	0	0.00990099	1.23324e-22	0.83058	4.73936	FALSE	3702.03	0.150839	0.855474	4.45348	4.09586e-21
7522	Tb427-100149700:pseudogene	0	0.00990099	1.34397e-22	0.489	4.722	FALSE	10464.1	0.978135	0.32547	1.60072	4.44841e-21
8361	Tb427-110069600	0	0.00990099	1.3666e-22	0.838894	4.49077	FALSE	5196.17	0.250261	0.768209	2.37412	4.50792e-21
7728	Tb427-110005500	0	0.00990099	1.37972e-22	0.140478	4.82736	FALSE	7421.01	0.458913	0.617499	2.30012	4.53578e-21
5867	Tb427-090063900	0	0.00990099	1.62405e-22	0.697458	4.44335	FALSE	3360.51	0.129621	0.876317	3.39979	5.32097e-21
4084	Tb427-070041400	0	0.00990099	1.65895e-22	0.646472	4.77506	FALSE	3713.18	0.151015	0.85639	3.89715	5.417e-21
6512	Tb427-100043800	0	0.00990099	2.38045e-22	0.271987	4.64821	FALSE	5301.72	0.256837	0.765918	3.05628	7.74683e-21
6305	Tb427-100022200	0	0.00990099	3.0197e-22	0.393826	4.57172	FALSE	2399.68	0.0818971	0.921438	13.4793	9.79433e-21
3880	Tb427-070018400	0	0.00990099	3.26908e-22	0.381296	4.88829	FALSE	3585.63	0.142423	0.869675	6.13658	1.05679e-20
9194	Tb427-110161600	0	0.00990099	3.8426e-22	0.594688	4.69214	FALSE	3531.16	0.140373	0.865323	3.79237	1.23806e-20
2265	Tb427-030055500	0	0.00990099	4.14274e-22	0.772578	4.76015	FALSE	3223.46	0.123671	0.884104	6.389	1.33034e-20
6445	Tb427-100037100	0	0.00990099	4.72552e-22	0.39377	3.15987	FALSE	9662.83	0.781724	0.423729	1.49797	1.51248e-20
3653	Tb427-060046000	0	0.00990099	5.07688e-22	0.964928	4.84469	FALSE	4655.43	0.210059	0.810353	5.20268	1.61959e-20
9050	Tb427-110147000	0	0.00990099	7.35123e-22	0.130589	4.48698	FALSE	5724.93	0.290858	0.740037	3.55614	2.33745e-20
2702	Tb427-040044500	0	0.00990099	7.69076e-22	0.998529	4.40969	FALSE	2263.9	0.0753278	0.927623	17.0321	2.43742e-20
2107	Tb427-030038800	0	0.00990099	9.57722e-22	0.886075	3.74047	FALSE	2903.04	0.104964	0.905405	4.44631	3.0254e-20
3807	Tb427-070010900	0	0.00990099	1.21526e-21	0.746514	4.77893	FALSE	2838.6	0.102377	0.90197	7.04193	3.82648e-20
3591	Tb427-060039800	0	0.00990099	1.36252e-21	0.330863	4.80836	FALSE	11077.3	1.10336	0.294091	1.62258	4.27627e-20
8219	Tb427-110055400	0	0.00990099	1.44015e-21	0.790055	4.63044	FALSE	2921.88	0.103221	0.903344	3.43996	4.50536e-20
2060	Tb427-030032600	0	0.00990099	2.51624e-21	0.394664	4.70766	FALSE	6364.88	0.345721	0.696519	2.33823	7.84647e-20
6950	Tb427-100089300	0	0.00990099	2.53538e-21	0.385082	4.31145	FALSE	4373.16	0.189207	0.823637	5.18716	7.88082e-20
3999	Tb427-070031100	0	0.00990099	2.54746e-21	0.11596	4.90008	FALSE	10185.3	0.877709	0.391434	2.31435	7.89305e-20
3230	Tb427-050046900	0	0.00990099	3.11623e-21	0.149034	4.38322	FALSE	3443.34	0.131886	0.876088	6.03345	9.6246e-20
6404	Tb427-100032500	0	0.00990099	3.7243e-21	0.985711	3.44021	FALSE	7483.14	0.457813	0.621164	1.83597	1.14661e-19
2619	Tb427-040036000	0	0.00990099	4.60081e-21	0.0271696	4.76826	FALSE	9027.53	0.674204	0.477554	1.74746	1.41198e-19
3378	Tb427-060015800	0	0.00990099	4.72895e-21	0.550464	4.63936	FALSE	3914.88	0.162238	0.853642	8.24939	1.44673e-19
2251	Tb427-030054100	0	0.00990099	5.12603e-21	0.979145	4.23762	FALSE	6292.83	0.336308	0.704535	1.83554	1.56328e-19
2989	Tb427-050022200	0	0.00990099	5.70275e-21	0.70171	4.76714	FALSE	3911.37	0.161987	0.848832	3.82961	1.72829e-19
6569	Tb427-100049600	0	0.00990099	5.69209e-21	0.540054	4.76621	FALSE	10188.6	0.911671	0.351122	1.75963	1.72829e-19
3279	Tb427-050053500	0	0.00990099	7.09847e-21	0.665535	4.42718	FALSE	4665.3	0.209881	0.805314	3.1554	2.14458e-19
4556	Tb427-080009600	0	0.00990099	7.81082e-21	0.962043	4.97337	FALSE	1496.67	0.0465831	0.955337	22.5846	2.35246e-19
3258	Tb427-050051300	0	0.00990099	8.35287e-21	0.725128	4.16976	FALSE	6375.55	0.345911	0.695831	1.98125	2.50793e-19
6589	Tb427-100051600	0	0.00990099	8.5803e-21	0.382494	4.49321	FALSE	5239.57	0.250295	0.771645	2.4866	2.56826e-19
6675	Tb427-100060200	0	0.00990099	1.0496e-20	0.892693	4.31328	FALSE	11849.2	1.39292	0.193999	1.43408	3.13201e-19
9164	Tb427-110158600	0	0.00990099	1.43786e-20	0.565793	4.62877	FALSE	7691.52	0.483826	0.598259	1.88801	4.27742e-19
5969	Tb427-090076200	0	0.00990099	2.10248e-20	0.559393	4.63069	FALSE	4409.45	0.189855	0.827073	4.40106	6.23542e-19
8095	Tb427-110042800	0	0.00990099	2.24278e-20	0.233139	4.78652	FALSE	6325.16	0.341215	0.700641	3.0433	6.63126e-19
6103	Tb427-090089700	0	0.00990099	2.31161e-20	0.798772	4.77494	FALSE	5060.02	0.237666	0.785845	5.21852	6.81398e-19
3257	Tb427-050051200	0	0.00990099	2.61364e-20	0.886828	4.29695	FALSE	9049.99	0.67454	0.483051	2.10539	7.6364e-19
6715	Tb427-100064300	0	0.00990099	2.60054e-20	0.642386	4.82088	FALSE	4550.36	0.201031	0.814475	4.2475	7.6364e-19
8130	Tb427-110046300	0	0.00990099	2.61423e-20	0.573681	4.91804	FALSE	3265.28	0.123285	0.885021	4.74335	7.6364e-19
2486	Tb427-040022300	0	0.00990099	2.65319e-20	0.685348	4.5179	FALSE	6105.22	0.316757	0.724004	2.63986	7.72691e-19
7132	Tb427-100108100	0	0.00990099	3.58996e-20	0.803867	4.40045	FALSE	6370.74	0.345088	0.695602	2.3885	1.04238e-18
2994	Tb427-050022700	0	0.00990099	3.74945e-20	0.0589281	4.71811	FALSE	4367.69	0.187876	0.823179	2.77828	1.08544e-18
6034	Tb427-090082700	0	0.00990099	7.39774e-20	0.730969	4.72913	FALSE	6321.79	0.339247	0.699038	1.76753	2.13522e-18
3377	Tb427-060015700	0	0.00990099	8.71836e-20	0.64789	4.3908	FALSE	2316.04	0.0773425	0.923729	4.55306	2.50892e-18
3690	Tb427-060050300	0	0.00990099	9.10958e-20	0.0396471	4.19638	FALSE	5066.79	0.235563	0.786761	3.2014	2.61375e-18
3739	Tb427-060055700	0	0.00990099	9.54235e-20	0.580704	1.00034	FALSE	9766.28	0.810115	0.405405	1.57493	2.72984e-18
3266	Tb427-050052100	0	0.00990099	1.03967e-19	0.74714	4.47543	FALSE	3631.86	0.144598	0.862574	5.53159	2.96551e-18
7008	Tb427-100095700	0	0.00990099	1.06046e-19	0.870307	4.26633	FALSE	5528.79	0.270486	0.762941	3.31655	3.01594e-18
3824	Tb427-070012600	0	0.00990099	1.18141e-19	0.225787	4.51521	FALSE	6210.89	0.332522	0.702474	2.00634	3.3501e-18
5120	Tb427-080069400	0	0.00990099	1.35404e-19	0.806092	4.41706	FALSE	3907.45	0.162227	0.847229	6.45053	3.82841e-18
7218	Tb427-100117900	0	0.00990099	1.38062e-19	0.996228	4.64432	FALSE	7303.43	0.440848	0.627806	1.9119	3.89223e-18
2513	Tb427-040025000	0	0.00990099	1.58682e-19	0.594272	4.8899	FALSE	3746.57	0.150272	0.859139	5.57269	4.46057e-18
3415	Tb427-060019500	0	0.00990099	1.67278e-19	0.16401	4.55216	FALSE	4383.69	0.190076	0.823408	2.69419	4.68863e-18
7524	Tb427-100149900	0	0.00990099	1.78673e-19	0.778746	4.29086	FALSE	8293.44	0.565103	0.538021	1.84903	4.99357e-18
6704	Tb427-100063200	0	0.00990099	1.82593e-19	0.653614	4.70881	FALSE	4673.15	0.209759	0.80852	4.69304	5.08846e-18
5487	Tb427-090024900	0	0.00990099	1.88742e-19	0.615616	4.29105	FALSE	4489.46	0.199695	0.808291	2.86998	5.24475e-18
5448	Tb427-090020600	0	0.00990099	2.27858e-19	0.436161	4.59391	FALSE	3813.89	0.154278	0.853184	2.95287	6.31361e-18
5350	Tb427-090009000	0	0.00990099	2.29742e-19	0.540165	4.55425	FALSE	5398.12	0.261115	0.766377	2.4214	6.34768e-18
2460	Tb427-040019700	0	0.00990099	2.46674e-19	0.0605945	4.51783	FALSE	4568.17	0.201347	0.809437	2.20763	6.79615e-18
7540	Tb427-100151500	0	0.00990099	2.49544e-19	0.346518	3.92446	FALSE	4701.52	0.209293	0.804627	2.81491	6.85576e-18
2533	Tb427-040027000	0	0.00990099	2.57979e-19	0.593629	4.7975	FALSE	8282.94	0.556664	0.556574	2.63231	7.06746e-18
4743	Tb427-080030800	0	0.00990099	2.87476e-19	0.737538	4.51668	FALSE	4481.3	0.192703	0.824324	4.10947	7.85335e-18
1621	Tb427-020015400	0	0.00990099	3.38605e-19	0.855136	4.67551	FALSE	2418.11	0.0809596	0.9235	7.84046	9.22412e-18
9418	Tb427-110184300	0	0.00990099	3.41469e-19	0.933816	3.67723	FALSE	7230.95	0.429381	0.641319	2.10295	9.27609e-18
2552	Tb427-040028900	0	0.00990099	4.0239e-19	0.934958	4.71614	FALSE	5513.23	0.269603	0.756757	2.20731	1.09005e-17
3534	Tb427-060034100	0	0.00990099	4.62957e-19	0.132065	4.84416	FALSE	3728.78	0.151321	0.859139	4.96028	1.25063e-17
6446	Tb427-100037200	0	0.00990099	4.8724e-19	0.959842	4.54338	FALSE	4818.1	0.219088	0.797755	2.90573	1.31257e-17
5863	Tb427-090063500	0	0.00990099	5.22866e-19	0.260075	4.37376	FALSE	7451.3	0.454891	0.617499	1.99923	1.40464e-17
7167	Tb427-100112800	0	0.00990099	6.15717e-19	0.629873	4.86857	FALSE	1541.38	0.0485399	0.951901	201.557	1.64951e-17
1474	Tb427-010027700	0	0.00990099	6.37699e-19	0.669933	4.47047	FALSE	8542.71	0.590918	0.53344	1.82472	1.70369e-17
2760	Tb427-040050900	0	0.00990099	7.31394e-19	0.461427	4.63558	FALSE	4510.8	0.198767	0.812643	3.37303	1.94864e-17
5522	Tb427-090028400	0	0.00990099	7.51955e-19	0.463033	4.657	FALSE	8132.22	0.536592	0.567568	1.80528	1.99793e-17
9059	Tb427-110147900	0	0.00990099	7.8456e-19	0.950218	4.63706	FALSE	2550.23	0.0888991	0.912964	7.40607	2.07887e-17
8678	Tb427-110102400	0	0.00990099	8.24272e-19	0.194432	3.33107	FALSE	4624.03	0.20799	0.804627	2.8633	2.17814e-17
5693	Tb427-090046100	0	0.00990099	9.86855e-19	0.417757	4.63935	FALSE	2257.91	0.0759231	0.927852	11.0467	2.60069e-17
6665	Tb427-100059200	0	0.00990099	1.24964e-18	0.328799	4.82353	FALSE	5118.09	0.23595	0.785158	2.22774	3.28428e-17
6212	Tb427-100012800	0	0.00990099	1.3328e-18	0.828374	3.93237	FALSE	4908.45	0.224598	0.794091	2.97961	3.49338e-17
8758	Tb427-110110600	0	0.00990099	1.33926e-18	0.325984	4.70428	FALSE	4665.48	0.2079	0.805543	2.62063	3.50085e-17
4839	Tb427-080040600	0	0.00990099	1.40336e-18	0.665504	4.07498	FALSE	5361.66	0.258405	0.760192	2.63367	3.65853e-17
3105	Tb427-050034400	0	0.00990099	1.46754e-18	0.910449	4.48023	FALSE	3623.25	0.142063	0.86601	4.97913	3.81559e-17
7644	Tb427-100162600	0	0.00990099	1.55511e-18	0.53845	4.39054	FALSE	4071.06	0.167435	0.843793	4.19804	4.03248e-17
7504	Tb427-100147900	0	0.00990099	1.68771e-18	0.265339	4.50666	FALSE	1601.58	0.0474784	0.952817	14.8558	4.36464e-17
5699	Tb427-090046700	0	0.00990099	1.81195e-18	0.463833	4.33013	FALSE	5863.96	0.298545	0.733394	2.29431	4.67349e-17
49	Tb427-000016000	0.0286194	0.00990099	2.05493e-18	0.570167	1.00021	FALSE	16786.9	6.92571	0	1.04256	5.28614e-17
4183	Tb427-070051300	0	0.00990099	2.11601e-18	0.812043	4.63048	FALSE	2498.93	0.0840025	0.916858	5.00336	5.42884e-17
7633	Tb427-100161500	0	0.00990099	2.21476e-18	0.416224	3.96581	FALSE	4894.46	0.223493	0.795465	2.72071	5.6672e-17
1432	Tb427-010022700	0	0.00990099	2.53537e-18	0.67661	4.72797	FALSE	4387.29	0.18895	0.827302	3.66231	6.45684e-17
8488	Tb427-110082300	0	0.00990099	2.53666e-18	0.356812	4.47353	FALSE	6473.32	0.354218	0.690105	3.27119	6.45684e-17
7352	Tb427-100131800	0	0.00990099	2.74263e-18	0.903014	4.80555	FALSE	2534.31	0.0875531	0.917545	9.9349	6.96284e-17
1763	Tb427-020029700	0	0.00990099	2.8051e-18	0.295044	4.25322	FALSE	4610.76	0.205369	0.809208	2.6044	7.10283e-17
2814	Tb427-040056500	0	0.00990099	3.60516e-18	0.439048	4.40659	FALSE	3931.6	0.162371	0.846312	4.52492	9.09904e-17
5268	Tb427-080084800	0	0.00990099	3.61222e-18	0.216008	4.48749	FALSE	7408.26	0.44485	0.635822	2.24862	9.09904e-17
6719	Tb427-100064700	0	0.00990099	5.12776e-18	0.763154	4.10217	FALSE	10637.8	1.00826	0.313559	1.36206	1.28832e-16
7976	Tb427-110030600	0	0.00990099	5.15251e-18	0.727491	4.43823	FALSE	5092.64	0.237428	0.780119	2.69018	1.29119e-16
2681	Tb427-040042400	0	0.00990099	5.27253e-18	0.951397	4.1741	FALSE	8627.26	0.594534	0.541686	1.70647	1.31786e-16
2541	Tb427-040027800	4.05687e-05	0.00990099	5.5239e-18	0.233338	3.18768	FALSE	12647.2	1.95742	0.0691709	1.16668	1.37714e-16
7326	Tb427-100129200	0	0.00990099	5.85072e-18	0.199228	4.67323	FALSE	2538.67	0.0874586	0.915254	6.61059	1.45488e-16
8794	Tb427-110120700	0	0.00990099	6.22343e-18	0.551099	4.47904	FALSE	6386.67	0.348733	0.69148	1.93954	1.5436e-16
7001	Tb427-100095000	0	0.00990099	7.24887e-18	0.0375933	4.57004	FALSE	4904.59	0.225093	0.793862	4.17776	1.79336e-16
8625	Tb427-110096100	0	0.00990099	8.79817e-18	0.286098	4.58957	FALSE	4774.68	0.214085	0.800046	2.49659	2.17111e-16
8184	Tb427-110051800	0	0.00990099	8.94156e-18	0.670315	4.59429	FALSE	3048.83	0.113205	0.890518	6.67529	2.2009e-16
4140	Tb427-070047000	0	0.00990099	1.30548e-17	0.50071	4.02181	FALSE	9232.02	0.711438	0.453046	1.92008	3.2052e-16
8229	Tb427-110056400	0	0.00990099	1.31598e-17	0.628025	4.72013	FALSE	2392.08	0.0799485	0.926248	9.19113	3.22282e-16
5301	Tb427-080088300	0	0.00990099	1.42179e-17	0.837655	1.43831	FALSE	5629.11	0.280481	0.745534	2.61961	3.47319e-16
7933	Tb427-110026300	0	0.00990099	1.46272e-17	0.286029	4.49798	FALSE	5043.41	0.235788	0.777371	2.13281	3.56418e-16
4922	Tb427-080048900	0	0.00990099	1.51203e-17	0.782268	3.93202	FALSE	4756.8	0.214485	0.797068	2.08952	3.67509e-16
4785	Tb427-080035100	0	0.00990099	1.5447e-17	0.390293	4.73631	FALSE	3962.7	0.161919	0.851809	3.17051	3.74514e-16
5789	Tb427-090055700	0	0.00990099	1.75518e-17	0.758331	4.45303	FALSE	4114.19	0.172381	0.836464	2.5191	4.24481e-16
6418	Tb427-100034100	0	0.00990099	2.07639e-17	0.437568	3.5396	FALSE	6221.51	0.33085	0.704535	1.75549	5.00915e-16
2007	Tb427-030027300	0	0.00990099	2.13261e-17	0.176206	4.49056	FALSE	2100.55	0.0695631	0.930371	6.94536	5.13202e-16
2130	Tb427-030041100	0	0.00990099	2.43725e-17	0.354388	4.72729	FALSE	2865.74	0.103396	0.903115	6.20601	5.85061e-16
3814	Tb427-070011600	0	0.00990099	2.53417e-17	0.681122	4.58213	FALSE	4644.5	0.205303	0.807146	2.34115	6.05435e-16
4835	Tb427-080040200	0	0.00990099	2.53461e-17	0.211309	4.75148	FALSE	2268.22	0.0747863	0.929226	5.80691	6.05435e-16
7807	Tb427-110013500	0.000262819	0.00990099	2.64764e-17	0.172482	4.46929	FALSE	14209.3	2.93951	0.0187815	1.22035	6.3088e-16
7585	Tb427-100156000	0	0.00990099	3.31881e-17	0.397231	4.05296	FALSE	6472.79	0.355121	0.688502	2.54809	7.88869e-16
4243	Tb427-070057300	0	0.00990099	3.69142e-17	0.0604305	4.51536	FALSE	3359.78	0.130159	0.874485	5.01597	8.75292e-16
6640	Tb427-100056700	0	0.00990099	4.32719e-17	0.968945	4.54476	FALSE	3211.48	0.120494	0.883875	8.8245	1.02354e-15
2917	Tb427-050014700	0	0.00990099	5.46103e-17	0.0700764	4.06915	FALSE	10911	1.07176	0.297297	1.46372	1.28859e-15
7414	Tb427-100138100	0	0.00990099	6.11617e-17	0.904335	4.32133	FALSE	3277.69	0.124232	0.878607	4.01206	1.43967e-15
4967	Tb427-080053800	0	0.00990099	6.59796e-17	0.862738	4.27051	FALSE	5394.28	0.263609	0.757902	3.13338	1.54932e-15
7433	Tb427-100140000	0	0.00990099	6.81011e-17	0.804547	4.08298	FALSE	3808.48	0.154621	0.852268	4.38276	1.59528e-15
4674	Tb427-080023900	0	0.00990099	6.8701e-17	0.876654	3.83851	FALSE	6732.45	0.378354	0.671095	2.49337	1.60545e-15
6577	Tb427-100050400	0	0.00990099	7.76613e-17	0.124464	4.61042	FALSE	2937.92	0.107283	0.896931	4.11278	1.81048e-15
2515	Tb427-040025200	0	0.00990099	8.2712e-17	0.281556	4.72222	FALSE	2393.91	0.0791112	0.922813	7.21342	1.9236e-15
8747	Tb427-110109500	0	0.00990099	9.13031e-17	0.997415	4.52207	FALSE	4700.85	0.212173	0.803252	2.54648	2.11832e-15
1849	Tb427-030010200	0	0.00990099	9.27716e-17	0.0294485	4.313	FALSE	4218.17	0.180485	0.827989	2.8753	2.14725e-15
38	Tb427-000014700	0	0.00990099	9.82739e-17	0.898421	4.80425	FALSE	8521.53	0.584507	0.54306	1.78292	2.26919e-15
8352	Tb427-110068700	0	0.00990099	1.05814e-16	0.124835	4.65108	FALSE	5202.71	0.248966	0.767751	2.17147	2.4375e-15
8958	Tb427-110137500	0	0.00990099	1.08064e-16	0.695725	4.16092	FALSE	2532.97	0.0870467	0.912048	5.29029	2.48342e-15
7022	Tb427-100097100	0	0.00990099	1.10491e-16	0.16511	4.50339	FALSE	3193.61	0.119364	0.884563	4.45039	2.53319e-15
5272	Tb427-080085200	0	0.00990099	1.13573e-16	0.638003	4.32626	FALSE	6627.15	0.367396	0.676363	1.66547	2.59772e-15
4654	Tb427-080021800	0	0.00990099	1.14317e-16	0.589005	4.83824	FALSE	2117.53	0.0679568	0.932661	5.89548	2.60858e-15
6917	Tb427-100086000	0	0.00990099	1.47776e-16	0.762903	3.70211	FALSE	7925.82	0.517586	0.566651	1.88972	3.36417e-15
7321	Tb427-100128700	0	0.00990099	1.48143e-16	0.736386	4.79781	FALSE	2757.34	0.0969936	0.907238	5.37513	3.36462e-15
8819	Tb427-110123200	0	0.00990099	1.54179e-16	0.612444	4.22146	FALSE	3814.1	0.152962	0.855016	2.55886	3.49351e-15
2735	Tb427-040048400	0	0.00990099	1.80223e-16	0.605366	4.57255	FALSE	5132.69	0.23814	0.786761	2.16862	4.07413e-15
5306	Tb427-080088800	0	0.00990099	1.9037e-16	0.374396	4.07793	FALSE	11137.5	1.13645	0.275309	1.55949	4.2935e-15
4947	Tb427-080051400	0	0.00990099	2.02648e-16	0.9602	4.12614	FALSE	3942.88	0.16247	0.844938	3.03202	4.55981e-15
5724	Tb427-090049200	0	0.00990099	2.12117e-16	0.189958	4.75275	FALSE	3476.91	0.132566	0.876088	4.90808	4.76183e-15
6163	Tb427-100007900	0	0.00990099	2.13075e-16	0.705628	4.51599	FALSE	8764.89	0.628132	0.509849	2.14567	4.77229e-15
8491	Tb427-110082600	0	0.00990099	2.33621e-16	0.879643	4.56947	FALSE	4352.27	0.186277	0.82547	3.03262	5.22041e-15
4019	Tb427-070034900	0	0.00990099	2.44444e-16	0.551032	3.99767	FALSE	3642.97	0.142649	0.862574	3.3681	5.44969e-15
8446	Tb427-110078100	0	0.00990099	2.46443e-16	0.572574	4.39294	FALSE	4798.54	0.218982	0.795236	3.07621	5.48166e-15
6516	Tb427-100044200	0	0.00990099	2.57287e-16	0.147876	4.3795	FALSE	5596.67	0.275113	0.756757	3.54294	5.70978e-15
1542	Tb427-020006900	1.03827e-07	0.00990099	2.8338e-16	0.505447	4.04078	FALSE	11520	1.29313	0.212322	1.42818	6.27448e-15
1451	Tb427-010024600	0	0.00990099	2.96573e-16	0.597481	4.51388	FALSE	4283.76	0.1814	0.831883	3.3557	6.55163e-15
128	Tb427-000110300	0	0.00990099	3.58245e-16	0.300479	4.85334	FALSE	8835.84	0.615207	0.538021	2.03192	7.89604e-15
7025	Tb427-100097400	0	0.00990099	4.03979e-16	0.732872	4.63748	FALSE	8119.94	0.534346	0.5694	1.74274	8.88387e-15
6892	Tb427-100083500	0	0.00990099	4.0505e-16	0.387915	4.41676	FALSE	4988.42	0.233761	0.780577	2.57862	8.88727e-15
4294	Tb427-070062400	0	0.00990099	4.42705e-16	0.752638	3.76121	FALSE	3976.85	0.163593	0.843793	3.36176	9.69154e-15
5988	Tb427-090078100	0	0.00990099	4.6984e-16	0.470806	3.74889	FALSE	3862.81	0.155002	0.851351	2.65731	1.02624e-14
6844	Tb427-100078600	0	0.00990099	5.85342e-16	0.594057	4.74858	FALSE	2007.64	0.0628452	0.938388	7.2253	1.27565e-14
2797	Tb427-040054600	0	0.00990099	6.62736e-16	0.928183	4.60785	FALSE	3368.23	0.128058	0.880898	3.58507	1.44108e-14
4079	Tb427-070040900	0	0.00990099	7.2439e-16	0.0422053	4.39485	FALSE	8086.7	0.534935	0.560925	1.58142	1.57162e-14
2335	Tb427-040007200	0	0.00990099	7.79073e-16	0.95886	4.92565	FALSE	3341.89	0.126324	0.879066	5.27363	1.68649e-14
6613	Tb427-100054000	0	0.00990099	8.55892e-16	0.733837	4.19585	FALSE	2858.22	0.103633	0.898534	7.2246	1.84865e-14
4123	Tb427-070045300	0	0.00990099	1.01573e-15	0.0883019	4.60509	FALSE	3364.5	0.126088	0.883417	3.13548	2.18902e-14
5632	Tb427-090039700	0	0.00990099	1.10972e-15	0.908217	4.75596	FALSE	2086.5	0.065229	0.9377	5.24679	2.38627e-14
7560	Tb427-100153500	0	0.00990099	1.14879e-15	0.431049	4.94148	FALSE	4701.2	0.210054	0.800046	2.48871	2.46482e-14
8892	Tb427-110130800	0	0.00990099	1.15317e-15	0.797386	4.18476	FALSE	5177.71	0.24315	0.776913	2.69935	2.46875e-14
7828	Tb427-110015600:pseudogene	0	0.00990099	1.25864e-15	0.98106	4.41993	FALSE	2524.44	0.0857218	0.914567	7.79818	2.68862e-14
9028	Tb427-110144500	0	0.00990099	1.29619e-15	0.382306	4.76304	FALSE	1858.5	0.057252	0.943655	9.25217	2.76273e-14
1645	Tb427-020017800	0	0.00990099	1.35524e-15	0.95346	3.91602	FALSE	10433.4	0.939954	0.353871	1.62029	2.88227e-14
4841	Tb427-080040800	0	0.00990099	1.41385e-15	0.886528	4.20379	FALSE	5503.09	0.267114	0.76088	2.30903	3.00033e-14
8208	Tb427-110054300	0	0.00990099	1.41987e-15	0.863534	4.27454	FALSE	4383.7	0.190482	0.819285	3.16569	3.00654e-14
330	Tb427-000311000:pseudogene	0	0.00990099	1.4231e-15	0.108078	4.92741	FALSE	2416.14	0.0810976	0.920751	17.2216	3.0068e-14
5816	Tb427-090058400	0	0.00990099	1.49271e-15	0.705208	2.15601	FALSE	7796.41	0.493699	0.587494	1.51611	3.14702e-14
5527	Tb427-090028900	0	0.00990099	1.51197e-15	0.516115	4.5974	FALSE	6903.96	0.40006	0.647732	1.78885	3.18072e-14
2361	Tb427-040009800	0	0.00990099	1.51964e-15	0.706312	4.55108	FALSE	2915.2	0.102133	0.903573	4.19958	3.18993e-14
6768	Tb427-100069800	0	0.00990099	1.62201e-15	0.872683	4.2535	FALSE	2564.26	0.0885635	0.913193	4.56193	3.39747e-14
6411	Tb427-100033200	0	0.00990099	1.66159e-15	0.356523	4.41199	FALSE	6905.28	0.395127	0.660101	1.87224	3.47287e-14
7864	Tb427-110019200	0	0.00990099	1.75039e-15	0.698777	3.77841	FALSE	7866.28	0.503259	0.583601	1.92161	3.65059e-14
5113	Tb427-080068700	0	0.00990099	1.96482e-15	0.344865	4.82573	FALSE	4382.19	0.18694	0.827302	3.08563	4.08901e-14
7235	Tb427-100119600	0	0.00990099	1.99246e-15	0.718278	4.3043	FALSE	6305.02	0.337979	0.701787	2.47018	4.13766e-14
1617	Tb427-020015000	0	0.00990099	2.65309e-15	0.0954836	4.7226	FALSE	1350.69	0.0393332	0.960834	30.0129	5.49779e-14
5690	Tb427-090045800	0	0.00990099	2.70687e-15	0.948075	4.21237	FALSE	3838.02	0.155372	0.850206	2.56973	5.59728e-14
8126	Tb427-110045900	0	0.00990099	3.13334e-15	0.224089	4.39054	FALSE	5588.1	0.273302	0.754466	2.24072	6.46535e-14
4590	Tb427-080013000	0	0.00990099	3.58796e-15	0.949646	4.28152	FALSE	3426.46	0.12955	0.877462	4.33707	7.38769e-14
8728	Tb427-110107600	0	0.00990099	3.61978e-15	0.468864	3.81026	FALSE	7282	0.434356	0.633074	1.99647	7.43742e-14
5715	Tb427-090048300	0	0.00990099	4.13412e-15	0.0935277	4.17509	FALSE	2722.21	0.0938854	0.908841	5.19534	8.47626e-14
8168	Tb427-110050200	0	0.00990099	4.57807e-15	0.500338	4.68847	FALSE	3933.6	0.159468	0.850893	2.77684	9.3667e-14
8483	Tb427-110081800	5.27791e-05	0.00990099	5.5688e-15	0.759358	3.72836	FALSE	12316.5	1.72072	0.106047	1.25064	1.13697e-13
6438	Tb427-100036400	0	0.00990099	5.95369e-15	0.799648	4.71748	FALSE	3319.91	0.125429	0.882501	6.47557	1.213e-13
2220	Tb427-030050600	0	0.00990099	6.8513e-15	0.31375	4.59476	FALSE	7438.01	0.453317	0.614521	2.03154	1.39295e-13
7623	Tb427-100160500	0	0.00990099	7.23801e-15	0.3606	4.27906	FALSE	7539.14	0.462267	0.611315	1.53329	1.4685e-13
7285	Tb427-100125100	0	0.00990099	7.53073e-15	0.118878	4.14069	FALSE	10425.6	0.942427	0.350664	1.74649	1.5247e-13
8172	Tb427-110050600	0	0.00990099	7.64524e-15	0.939994	3.84707	FALSE	4175.06	0.176999	0.829821	3.43836	1.54466e-13
4293	Tb427-070062300	0	0.00990099	8.87601e-15	0.128142	4.66701	FALSE	2010.5	0.0632487	0.938846	8.03518	1.7896e-13
4098	Tb427-070042800	0	0.00990099	9.4171e-15	0.929577	4.4781	FALSE	5362.49	0.260328	0.759505	2.18549	1.89475e-13
5364	Tb427-090011400	0	0.00990099	9.90717e-15	0.689662	4.10701	FALSE	6344.54	0.339686	0.700641	1.68236	1.98923e-13
1620	Tb427-020015300	0	0.00990099	1.00161e-14	0.433129	4.76148	FALSE	1930.22	0.0596973	0.941365	6.22906	2.00694e-13
5579	Tb427-090034200	0	0.00990099	1.00752e-14	0.70486	4.50246	FALSE	4553.3	0.199628	0.812185	2.6257	2.01463e-13
4887	Tb427-080045400	0	0.00990099	1.07132e-14	0.6186	4.10211	FALSE	4740.19	0.213473	0.797297	3.09624	2.13779e-13
2629	Tb427-040037000	0	0.00990099	1.17023e-14	0.409133	4.23277	FALSE	2560.7	0.0863051	0.91617	5.66866	2.33036e-13
2993	Tb427-050022600	0	0.00990099	1.19434e-14	0.0714494	4.81552	FALSE	4662	0.207372	0.804169	2.42161	2.3735e-13
4170	Tb427-070050000	0	0.00990099	1.35524e-14	0.646912	4.03759	FALSE	4639.84	0.205745	0.80394	2.03884	2.68551e-13
7047	Tb427-100099600	0	0.00990099	1.35688e-14	0.308548	4.64383	FALSE	4002.53	0.162645	0.850664	3.33367	2.68551e-13
5844	Tb427-090061600	0.00565885	0.00990099	1.3726e-14	0.435653	3.06843	FALSE	13218.7	2.46962	0.0222171	1.15842	2.7111e-13
8523	Tb427-110085800	0	0.00990099	1.60845e-14	0.74773	4.55562	FALSE	3835.52	0.152024	0.860055	2.96994	3.17047e-13
6464	Tb427-100039000	0	0.00990099	1.66904e-14	0.80531	4.44203	FALSE	1573.26	0.0457293	0.953962	8.33338	3.28323e-13
3022	Tb427-050025700	0	0.00990099	1.71693e-14	0.598372	4.48584	FALSE	3063.51	0.11163	0.893266	3.59773	3.3706e-13
2125	Tb427-030040600	0	0.00990099	1.83953e-14	0.878047	4.39782	FALSE	8896.64	0.637107	0.513055	1.78972	3.60399e-13
7898	Tb427-110022700	0	0.00990099	1.8791e-14	0.0840451	4.78985	FALSE	1539.45	0.0475798	0.951672	52.1495	3.67409e-13
4422	Tb427-070076200	0.052124	0.00990099	2.27835e-14	0.481798	2.88614	FALSE	14826.3	4.02642	0.00137426	1.0734	4.44576e-13
4866	Tb427-080043300	0	0.00990099	2.43362e-14	0.775042	3.83763	FALSE	8612.93	0.596583	0.534127	1.93356	4.73921e-13
2123	Tb427-030040400	0	0.00990099	2.53217e-14	0.239058	4.47147	FALSE	8390.41	0.564192	0.555428	1.92749	4.92124e-13
5133	Tb427-080070700	0	0.00990099	2.55588e-14	0.284003	4.6295	FALSE	4455.89	0.194418	0.817682	2.75529	4.95738e-13
9051	Tb427-110147100	0	0.00990099	2.60179e-14	0.915443	1.86269	FALSE	1499.02	0.0418839	0.959001	5.04585	5.03637e-13
9392	Tb427-110181700	0	0.00990099	2.74857e-14	0.850915	4.62955	FALSE	4419.06	0.187994	0.826844	2.48291	5.30988e-13
3899	Tb427-070020300	0	0.00990099	2.77689e-14	0.610851	4.6497	FALSE	2919.48	0.103539	0.89945	2.82986	5.35393e-13
6830	Tb427-100077200	0	0.00990099	2.88269e-14	0.496451	3.47485	FALSE	5875.57	0.296117	0.73683	1.95073	5.54689e-13
1489	Tb427-010029200	0	0.00990099	2.96317e-14	0.6511	4.08302	FALSE	4795.51	0.216405	0.797068	3.2564	5.69046e-13
5823	Tb427-090059100	0	0.00990099	3.13009e-14	0.550707	4.66607	FALSE	4109.58	0.168822	0.842419	3.24999	5.99913e-13
1370	Tb427-010015000	0	0.00990099	3.69546e-14	0.948128	4.4848	FALSE	3281.68	0.121878	0.884563	5.52729	7.06875e-13
4211	Tb427-070054100	0	0.00990099	3.70599e-14	0.279721	4.38593	FALSE	1981.03	0.0631158	0.938388	5.34625	7.07493e-13
9154	Tb427-110157600	0	0.00990099	4.07974e-14	0.929419	4.1293	FALSE	2305.16	0.0756287	0.925561	6.52289	7.77315e-13
6763	Tb427-100069300	0	0.00990099	4.20899e-14	0.294402	4.39995	FALSE	4014.91	0.166028	0.840815	3.06739	8.00369e-13
7508	Tb427-100148300	0	0.00990099	4.23888e-14	0.465265	4.67796	FALSE	4558.23	0.197906	0.816766	2.79459	8.04476e-13
5526	Tb427-090028800	0	0.00990099	4.93092e-14	0.175215	4.41424	FALSE	6847.76	0.388933	0.665369	1.73896	9.33986e-13
8767	Tb427-110111500	0	0.00990099	5.71709e-14	0.683336	4.33973	FALSE	4690.39	0.207336	0.809895	4.10388	1.08079e-12
2219	Tb427-030050500	0	0.00990099	6.67755e-14	0.953742	4.66303	FALSE	5133.29	0.238291	0.785616	2.38569	1.2599e-12
8750	Tb427-110109800	0	0.00990099	7.18283e-14	0.496966	4.5481	FALSE	4821.16	0.217521	0.798443	2.25181	1.3526e-12
3357	Tb427-060013500	0	0.00990099	7.50664e-14	0.158895	4.32688	FALSE	9660.46	0.789165	0.409299	1.55108	1.41084e-12
2267	Tb427-030055700	0	0.00990099	8.68113e-14	0.979166	4.65666	FALSE	3116.76	0.114563	0.890289	3.95785	1.62842e-12
4862	Tb427-080042900	0	0.00990099	9.79916e-14	0.0117597	4.67659	FALSE	4487.53	0.192156	0.82547	3.43978	1.8346e-12
1895	Tb427-030014800	0	0.00990099	9.88572e-14	0.558467	4.39505	FALSE	4604.96	0.20296	0.806459	2.9481	1.84724e-12
8688	Tb427-110103400	0	0.00990099	1.00548e-13	0.499846	4.60978	FALSE	2478.5	0.0824815	0.921209	10.153	1.87523e-12
7081	Tb427-100103000	0	0.00990099	1.06274e-13	0.080512	4.11902	FALSE	4739.5	0.209273	0.811269	3.57293	1.97821e-12
5525	Tb427-090028700	0	0.00990099	1.15069e-13	0.779818	4.77573	FALSE	2054.36	0.0638799	0.9377	5.29926	2.13781e-12
2775	Tb427-040052400	0	0.00990099	1.32087e-13	0.83048	4.60379	FALSE	7226.55	0.427243	0.640632	1.965	2.44929e-12
4456	Tb427-070079700	0	0.00990099	1.40211e-13	0.549506	4.70509	FALSE	3565.59	0.137037	0.87082	2.86632	2.59498e-12
2491	Tb427-040022800	0	0.00990099	1.67686e-13	0.817818	4.34895	FALSE	6403.54	0.344788	0.69629	2.21756	3.09756e-12
4849	Tb427-080041600	0	0.00990099	1.7899e-13	0.571104	3.756	FALSE	5436.93	0.259479	0.768438	2.35762	3.30008e-12
8586	Tb427-110092100	0	0.00990099	1.99753e-13	0.771232	4.72912	FALSE	7768.57	0.485531	0.601695	1.82676	3.67591e-12
3155	Tb427-050039400	0	0.00990099	2.09576e-13	0.211676	3.6451	FALSE	3972.45	0.159762	0.849748	2.4651	3.84937e-12
7209	Tb427-100117000	0	0.00990099	3.26094e-13	0.710085	3.91964	FALSE	4067.13	0.166852	0.840815	2.12286	5.97818e-12
1948	Tb427-030020100	0	0.00990099	3.38976e-13	0.0265713	4.18806	FALSE	2588.42	0.0875774	0.915025	3.5955	6.20261e-12
8089	Tb427-110042200	0	0.00990099	3.55272e-13	0.819596	3.39819	FALSE	4334.96	0.18513	0.822721	2.45908	6.48856e-12
4175	Tb427-070050500	0	0.00990099	3.61686e-13	0.973926	4.16992	FALSE	4282.79	0.181477	0.830508	2.34698	6.59329e-12
7639	Tb427-100162100	0	0.00990099	3.72371e-13	0.071466	3.29466	FALSE	10125.7	0.875103	0.376317	1.40249	6.77533e-12
7389	Tb427-100135600	0	0.00990099	4.04643e-13	0.472327	4.49622	FALSE	8596.67	0.601924	0.523133	2.24933	7.34875e-12
8997	Tb427-110141400	0	0.00990099	4.10599e-13	0.980803	4.8568	FALSE	2614.37	0.0902697	0.91388	8.49869	7.44298e-12
2587	Tb427-040032400	0	0.00990099	4.44533e-13	0.132446	4.04283	FALSE	4164.89	0.17453	0.834173	2.36037	8.04307e-12
5758	Tb427-090052600	0	0.00990099	4.90049e-13	0.563121	4.59601	FALSE	7624.92	0.470895	0.609482	2.09817	8.85008e-12
4142	Tb427-070047200	9.0385e-07	0.00990099	5.18598e-13	0.573637	3.89028	FALSE	10267.3	0.925587	0.341732	1.25702	9.34826e-12
4804	Tb427-080037000	0	0.00990099	5.37541e-13	0.527646	3.97266	FALSE	6816.74	0.389174	0.658497	1.88303	9.67175e-12
7648	Tb427-100163000	0	0.00990099	5.47414e-13	0.148124	4.45647	FALSE	4118.88	0.169033	0.841732	3.13422	9.83116e-12
8835	Tb427-110124800	0	0.00990099	5.50052e-13	0.0842246	4.2015	FALSE	5090.09	0.236658	0.78218	2.66871	9.86027e-12
1604	Tb427-020013400	8.31575e-07	0.00990099	5.53423e-13	0.972468	4.48433	FALSE	10086.2	0.880019	0.363949	1.33181	9.9024e-12
3946	Tb427-070025800	0	0.00990099	5.66194e-13	0.419713	1.00045	FALSE	9332.2	0.706225	0.471141	1.4264	1.00937e-11
5477	Tb427-090023500	0	0.00990099	5.65723e-13	0.881045	3.76788	FALSE	3915.31	0.158186	0.848374	2.44974	1.00937e-11
7714	Tb427-100170800	0	0.00990099	5.97124e-13	0.921436	4.15801	FALSE	5785.07	0.288884	0.743243	1.90804	1.06255e-11
4177	Tb427-070050700	0	0.00990099	6.33958e-13	0.821058	4.12825	FALSE	11804.3	1.40853	0.182547	1.2318	1.12603e-11
2155	Tb427-030043600	0	0.00990099	6.4925e-13	0.538466	3.38596	FALSE	7249.24	0.433075	0.626661	1.71129	1.15108e-11
6253	Tb427-100017000	0	0.00990099	6.7068e-13	0.923861	3.88293	FALSE	7072.31	0.410104	0.648191	1.69862	1.18691e-11
3606	Tb427-060041300	0	0.00990099	6.74588e-13	0.983485	4.75423	FALSE	3818.97	0.151518	0.856848	2.54909	1.19165e-11
415	Tb427-000481600:pseudogene	0	0.00990099	6.92349e-13	0.289236	4.15943	FALSE	4250.27	0.177074	0.834402	2.90939	1.2208e-11
4823	Tb427-080038900	0	0.00990099	7.42704e-13	0.702112	4.8232	FALSE	1405.16	0.0400113	0.961521	12.6569	1.30721e-11
5122	Tb427-080069600	3.47171e-05	0.00990099	7.8256e-13	0.556145	3.89022	FALSE	4332.05	0.180237	0.831883	1.61251	1.37487e-11
4203	Tb427-070053300	0	0.00990099	8.4238e-13	0.161273	4.15066	FALSE	7618.87	0.471943	0.606734	1.59243	1.47729e-11
5906	Tb427-090068200	0	0.00990099	8.74566e-13	0.597668	4.6041	FALSE	3482.24	0.132989	0.874714	2.88798	1.53096e-11
7840	Tb427-110016800	0	0.00990099	8.82358e-13	0.971932	3.79756	FALSE	6723.33	0.373636	0.676592	1.71385	1.54182e-11
8832	Tb427-110124500	0	0.00990099	9.91596e-13	0.751477	4.79785	FALSE	2902.18	0.10442	0.900596	4.33972	1.72959e-11
6346	Tb427-100026700	0	0.00990099	1.06573e-12	0.442217	4.69336	FALSE	6176.58	0.323621	0.71759	2.18896	1.85556e-11
5742	Tb427-090051000	0	0.00990099	1.08442e-12	0.350497	3.59035	FALSE	7184.28	0.424509	0.635822	1.82191	1.88472e-11
4914	Tb427-080048100	0	0.00990099	1.08954e-12	0.838497	3.98476	FALSE	6532.89	0.353805	0.695373	1.76249	1.89022e-11
7959	Tb427-110028900	0	0.00990099	1.13153e-12	0.737062	4.55864	FALSE	6501.26	0.354738	0.686899	2.21524	1.95956e-11
3443	Tb427-060023400	0	0.00990099	1.1621e-12	0.699998	4.68596	FALSE	2743.97	0.0956871	0.909528	4.97895	2.00893e-11
3374	Tb427-060015400	0	0.00990099	1.1783e-12	0.431636	4.56077	FALSE	3091.18	0.111843	0.894182	4.01146	2.03329e-11
8091	Tb427-110042400	0	0.00990099	1.19344e-12	0.600403	3.56869	FALSE	3883.74	0.154655	0.853642	2.32789	2.05577e-11
119	Tb427-000109000	0	0.00990099	1.2092e-12	0.660046	4.30889	FALSE	2096.58	0.0663176	0.938617	4.09517	2.07923e-11
6813	Tb427-100075200	0	0.00990099	1.23183e-12	0.349246	4.40169	FALSE	4608.54	0.202121	0.812185	3.45617	2.11439e-11
4060	Tb427-070039000	0	0.00990099	1.29832e-12	0.0904449	4.24281	FALSE	6549.23	0.360783	0.680486	2.54415	2.22458e-11
7144	Tb427-100109300	0	0.00990099	1.42069e-12	0.855996	4.93479	FALSE	5938.2	0.29641	0.749198	2.58974	2.42996e-11
7668	Tb427-100165000	0	0.00990099	1.47267e-12	0.979809	4.57173	FALSE	2260.81	0.0732976	0.929226	9.69733	2.51444e-11
5486	Tb427-090024800	0	0.00990099	1.5482e-12	0.54373	4.39259	FALSE	5623.63	0.275421	0.751031	2.7582	2.63874e-11
7340	Tb427-100130600	0	0.00990099	1.55837e-12	0.93243	4.7011	FALSE	2513.42	0.0844372	0.917087	3.50869	2.65142e-11
7581	Tb427-100155600	0	0.00990099	1.5747e-12	0.975624	4.60241	FALSE	5363.32	0.256799	0.764544	2.17724	2.6745e-11
6765	Tb427-100069500	0	0.00990099	1.62479e-12	0.541044	4.03831	FALSE	6113.77	0.316155	0.723087	1.68805	2.75475e-11
8941	Tb427-110135700	0	0.00990099	1.97403e-12	0.277317	4.51412	FALSE	2575.47	0.0880726	0.914109	5.76076	3.34104e-11
1368	Tb427-010014800	0	0.00990099	2.12055e-12	0.673749	3.89919	FALSE	4383.66	0.186764	0.824782	2.93727	3.58276e-11
8070	Tb427-110040100	0	0.00990099	2.12808e-12	0.48863	4.19061	FALSE	5151.81	0.240227	0.778745	2.04704	3.58924e-11
4551	Tb427-080009100	2.85191e-06	0.00990099	2.26348e-12	0.658485	4.3772	FALSE	11977.5	1.51508	0.144984	1.23777	3.81098e-11
4527	Tb427-080006700	0	0.00990099	2.35019e-12	0.627514	4.32966	FALSE	7171.7	0.419833	0.64109	1.87123	3.95011e-11
3590	Tb427-060039700	0	0.00990099	2.54037e-12	0.38842	4.02556	FALSE	9780.55	0.797008	0.41869	1.39678	4.255e-11
6842	Tb427-100078400	0	0.00990099	2.53613e-12	0.459392	4.47863	FALSE	3251.34	0.121387	0.882272	3.5571	4.255e-11
6549	Tb427-100047500	0	0.00990099	2.70377e-12	0.931213	4.6772	FALSE	4975.63	0.227391	0.790884	2.17911	4.5209e-11
9185	Tb427-110160700	0	0.00990099	2.92346e-12	0.613773	4.09283	FALSE	2406.85	0.0803723	0.922355	6.58183	4.87982e-11
6222	Tb427-100013900	0	0.00990099	2.95034e-12	0.648881	4.32033	FALSE	8636.98	0.614888	0.508704	1.71795	4.91622e-11
5457	Tb427-090021500	0	0.00990099	3.31372e-12	0.741684	4.47633	FALSE	2736.98	0.0943188	0.909528	5.26571	5.51225e-11
8402	Tb427-110073700	0	0.00990099	3.61122e-12	0.678316	4.13821	FALSE	9560.06	0.75213	0.446175	1.73512	5.99685e-11
6537	Tb427-100046300	0	0.00990099	3.72107e-12	0.0792192	4.4061	FALSE	3456.2	0.131451	0.872652	2.54764	6.16871e-11
1609	Tb427-020013900	0	0.00990099	3.90849e-12	0.0479839	4.4296	FALSE	571.397	0.0134909	0.986257	28.9319	6.46835e-11
5986	Tb427-090077900	0	0.00990099	3.92446e-12	0.757529	4.61141	FALSE	10312	0.933015	0.340586	1.60487	6.48371e-11
6010	Tb427-090080300	0	0.00990099	4.20587e-12	0.2803	3.40189	FALSE	5244.3	0.243792	0.779203	1.62836	6.93683e-11
7240	Tb427-100120100	0	0.00990099	4.25936e-12	0.565751	1.70689	FALSE	8542.75	0.605599	0.507787	1.63992	7.01312e-11
9257	Tb427-110167900	0	0.00990099	4.47293e-12	0.655533	4.35543	FALSE	10469.6	0.963582	0.33257	1.37065	7.35228e-11
7906	Tb427-110023500	0	0.00990099	4.49399e-12	0.497189	4.2247	FALSE	1382.13	0.0411451	0.958085	26.8003	7.3744e-11
6621	Tb427-100054800:pseudogene	0	0.00990099	4.51604e-12	0.725098	4.1745	FALSE	3752.93	0.148177	0.860971	4.19204	7.39806e-11
6915	Tb427-100085800	0	0.00990099	4.59829e-12	0.43248	3.72241	FALSE	2423.22	0.0806475	0.92098	6.4355	7.52011e-11
6059	Tb427-090085200	0	0.00990099	4.85571e-12	0.931331	4.83324	FALSE	2071.12	0.0641073	0.939075	3.42612	7.92772e-11
5933	Tb427-090070900	0	0.00990099	4.8899e-12	0.724792	4.71493	FALSE	3064.61	0.110698	0.896015	3.97193	7.97012e-11
1303	Tb427-010008300	0	0.00990099	5.1208e-12	0.685832	4.17988	FALSE	3741.06	0.14695	0.859826	2.26452	8.33248e-11
6755	Tb427-100068500	0	0.00990099	6.01086e-12	0.117441	4.31215	FALSE	4158.91	0.171373	0.841044	3.16683	9.76437e-11
9052	Tb427-110147200	0	0.00990099	6.05876e-12	0.657509	4.30416	FALSE	2861.09	0.101327	0.899679	2.92646	9.82573e-11
1616	Tb427-020014900	0	0.00990099	6.76683e-12	0.298392	4.81683	FALSE	885.636	0.0222454	0.978012	7.86217	1.09557e-10
9391	Tb427-110181600	0	0.00990099	6.89321e-12	0.0745259	4.19293	FALSE	6238.67	0.326475	0.716445	1.80458	1.11417e-10
6181	Tb427-100009700	0	0.00990099	6.90853e-12	0.9714	3.85045	FALSE	2782.05	0.0965132	0.905634	2.50823	1.11479e-10
3717	Tb427-060053000	0	0.00990099	7.53157e-12	0.592782	4.22142	FALSE	5211.22	0.243575	0.775538	2.43529	1.21331e-10
4012	Tb427-070032400	0	0.00990099	7.76157e-12	0.435147	4.60623	FALSE	3447.17	0.13067	0.874256	2.44895	1.24829e-10
36	Tb427-000014500:pseudogene	0	0.00990099	8.13301e-12	0.0525512	4.93237	FALSE	10387.6	0.927885	0.35639	1.95273	1.3037e-10
6517	Tb427-100044300	0	0.00990099	8.13145e-12	0.731068	4.45645	FALSE	3579.73	0.13757	0.870591	3.75591	1.3037e-10
4820	Tb427-080038600	0	0.00990099	8.50213e-12	0.887128	4.56219	FALSE	5362.63	0.258251	0.765231	2.17299	1.36062e-10
8616	Tb427-110095200	0	0.00990099	8.76835e-12	0.874161	4.82733	FALSE	2902.34	0.101848	0.901741	2.72213	1.40091e-10
2156	Tb427-030043800	0	0.00990099	9.01074e-12	0.593584	1.00026	FALSE	11693	1.38627	0.179569	1.28305	1.43727e-10
7293	Tb427-100125900	0	0.00990099	9.05874e-12	0.252539	4.86058	FALSE	2105.02	0.0660283	0.936784	5.19696	1.44256e-10
1624	Tb427-020015700	0	0.00990099	9.43935e-12	0.86254	4.56704	FALSE	3377.28	0.125821	0.879753	3.38261	1.5007e-10
6909	Tb427-100085200	0	0.00990099	9.65935e-12	0.167794	4.63315	FALSE	10324.7	0.884479	0.391205	1.60204	1.53316e-10
2785	Tb427-040053400	0	0.00990099	9.92753e-12	0.0392836	3.97013	FALSE	4805.52	0.215929	0.797984	2.90244	1.57316e-10
1836	Tb427-030008900	0	0.00990099	1.0078e-11	0.767939	4.08319	FALSE	3632.12	0.139591	0.868071	2.9028	1.59439e-10
7151	Tb427-100110000	0	0.00990099	1.04365e-11	0.986759	1.00015	FALSE	3580.43	0.138692	0.865323	3.00301	1.64842e-10
2475	Tb427-040021200	0	0.00990099	1.0538e-11	0.477594	4.44837	FALSE	3752.21	0.148459	0.857994	2.32059	1.66175e-10
7892	Tb427-110022100	0	0.00990099	1.05771e-11	0.721002	4.15361	FALSE	6564.95	0.359275	0.684608	1.91327	1.66521e-10
1378	Tb427-010015900	0	0.00990099	1.23447e-11	0.663218	3.34834	FALSE	8693.25	0.618688	0.507558	1.56782	1.94034e-10
4468	Tb427-070080900	0	0.00990099	1.27477e-11	0.620233	4.63523	FALSE	2503.02	0.0840337	0.919377	4.31677	2.00044e-10
2894	Tb427-050012400	0	0.00990099	1.39313e-11	0.521879	4.65705	FALSE	6317.05	0.335171	0.704993	2.60436	2.18265e-10
3517	Tb427-060032400:pseudogene	0	0.00990099	1.41955e-11	0.976979	3.54326	FALSE	2824.03	0.0988677	0.903115	3.83533	2.22045e-10
7675	Tb427-100165700	0	0.00990099	1.48049e-11	0.363153	4.42863	FALSE	7301.8	0.4347	0.631699	1.57495	2.31204e-10
6252	Tb427-100016900	0	0.00990099	1.51368e-11	0.462904	3.84121	FALSE	8063.45	0.52768	0.567339	1.98903	2.36007e-10
4903	Tb427-080047000	0	0.00990099	1.59891e-11	0.111921	4.41187	FALSE	5238.91	0.245241	0.774393	1.9646	2.48896e-10
5991	Tb427-090078400	0	0.00990099	1.71996e-11	0.675132	3.89592	FALSE	2870.92	0.100879	0.90197	4.23194	2.6731e-10
5509	Tb427-090027100	0.000830773	0.00990099	1.8703e-11	0.190816	3.55069	FALSE	12974.4	2.26574	0.0371049	1.20325	2.90211e-10
5326	Tb427-090006600	0	0.00990099	1.92009e-11	0.0272819	4.19901	FALSE	3772.52	0.146608	0.865552	3.85267	2.97198e-10
6721	Tb427-100064900	0.0166675	0.00990099	1.92146e-11	0.352488	4.19843	FALSE	12720.4	2.00577	0.0595511	1.16307	2.97198e-10
7415	Tb427-100138200	0	0.00990099	2.01706e-11	0.248475	3.84994	FALSE	4341.24	0.18364	0.828676	2.52393	3.11488e-10
4350	Tb427-070068200	0	0.00990099	2.0489e-11	0.578762	4.29868	FALSE	2479.81	0.0834225	0.918461	5.08972	3.15902e-10
9242	Tb427-110166400	0	0.00990099	2.06307e-11	0.721856	4.94259	FALSE	2610.01	0.0891383	0.914796	7.98794	3.17582e-10
3882	Tb427-070018600	0	0.00990099	2.094e-11	0.292035	3.83374	FALSE	3861.31	0.153725	0.855474	2.90877	3.21832e-10
2455	Tb427-040019200	0	0.00990099	2.16401e-11	0.911256	4.75737	FALSE	4673.08	0.204724	0.809437	2.23245	3.32066e-10
5395	Tb427-090014800	2.78844e-05	0.00990099	2.29198e-11	0.865467	4.51959	FALSE	11703.6	1.38022	0.183463	1.36745	3.51147e-10
9282	Tb427-110170400	0	0.00990099	2.49083e-11	0.139526	2.62114	FALSE	4599.42	0.200904	0.811269	2.19342	3.81011e-10
8904	Tb427-110132000	0	0.00990099	2.56633e-11	0.127824	4.21788	FALSE	5460.67	0.2626	0.763857	2.66173	3.91942e-10
3973	Tb427-070028500	0	0.00990099	2.70377e-11	0.690944	4.62929	FALSE	4707.35	0.207658	0.808291	3.56047	4.12282e-10
7521	Tb427-100149600	2.38201e-05	0.00990099	2.74499e-11	0.980006	4.66401	FALSE	13080.1	1.97383	0.096885	1.32975	4.1791e-10
1631	Tb427-020016400	0	0.00990099	2.81849e-11	0.578198	4.767	FALSE	4331.81	0.184478	0.827989	5.17373	4.28428e-10
7503	Tb427-100147800	0	0.00990099	2.82426e-11	0.106213	3.7585	FALSE	4345.97	0.184528	0.824095	2.19015	4.28634e-10
8864	Tb427-110127700	0	0.00990099	2.92422e-11	0.611911	3.21173	FALSE	5691.05	0.282076	0.741182	1.78571	4.43111e-10
4575	Tb427-080011500	0	0.00990099	3.00257e-11	0.647015	4.67967	FALSE	6424.21	0.343647	0.701557	2.16283	4.54273e-10
5106	Tb427-080068000	0	0.00990099	3.07008e-11	0.335996	4.27921	FALSE	5794.64	0.289245	0.739808	1.71521	4.63763e-10
2450	Tb427-040018700	0	0.00990099	3.12022e-11	0.608429	4.4399	FALSE	3926.05	0.156596	0.854558	2.27976	4.70605e-10
2429	Tb427-040016600	0	0.00990099	3.23464e-11	0.997739	4.02532	FALSE	2309.39	0.0755338	0.925103	3.2961	4.87104e-10
3428	Tb427-060020800:pseudogene	0	0.00990099	3.53198e-11	0.791156	3.25477	FALSE	9078.57	0.671053	0.487861	1.66863	5.31056e-10
2097	Tb427-030037800	0	0.00990099	3.82879e-11	0.736359	4.5054	FALSE	3733.69	0.146211	0.861887	2.64208	5.74793e-10
6037	Tb427-090083000	0	0.00990099	3.93447e-11	0.61494	4.74339	FALSE	8550.8	0.597217	0.519469	1.52986	5.89744e-10
6062	Tb427-090085500	0	0.00990099	4.04876e-11	0.739035	4.42002	FALSE	3261.47	0.120264	0.886624	4.58718	6.0594e-10
7441	Tb427-100140800	0	0.00990099	5.00286e-11	0.701794	4.00303	FALSE	4383.89	0.186106	0.824324	2.11927	7.47576e-10
3123	Tb427-050036200	0	0.00990099	5.04141e-11	0.329677	4.28928	FALSE	2706.76	0.0931395	0.910444	5.53138	7.52178e-10
4836	Tb427-080040300	7.11848e-07	0.00990099	5.07445e-11	0.809329	4.63406	FALSE	6985.69	0.39979	0.65552	1.51197	7.55945e-10
3016	Tb427-050025100	0	0.00990099	5.13147e-11	0.148998	3.76781	FALSE	4343.8	0.183658	0.825699	2.09827	7.63267e-10
3116	Tb427-050035500	0	0.00990099	5.15274e-11	0.0826494	3.68035	FALSE	1982.34	0.0610435	0.941594	6.12879	7.65257e-10
2779	Tb427-040052800	0	0.00990099	5.66411e-11	0.365249	4.60844	FALSE	5165.97	0.236791	0.792029	2.13126	8.39916e-10
6123	Tb427-090092200	0	0.00990099	5.72707e-11	0.591296	4.19101	FALSE	3749.48	0.147871	0.860513	3.39495	8.47956e-10
5927	Tb427-090070300	0	0.00990099	5.74773e-11	0.941277	4.44255	FALSE	4698.5	0.205798	0.810582	1.89295	8.49717e-10
5941	Tb427-090071900	0	0.00990099	5.84586e-11	0.644885	4.69481	FALSE	3054.2	0.109968	0.896931	3.47686	8.6291e-10
9360	Tb427-110178400	0	0.00990099	5.954e-11	0.57029	4.03214	FALSE	8766.78	0.63059	0.498626	1.70076	8.77537e-10
7691	Tb427-100168500	0	0.00990099	6.10385e-11	0.826281	4.11339	FALSE	2704.13	0.0925302	0.910673	5.36686	8.98257e-10
6415	Tb427-100033800	0	0.00990099	6.14004e-11	0.462359	4.30449	FALSE	3749.46	0.146515	0.862116	3.723	9.02214e-10
3556	Tb427-060036300	0	0.00990099	6.48115e-11	0.912033	4.11655	FALSE	3797.71	0.149518	0.858223	3.44804	9.50895e-10
5344	Tb427-090008400	0	0.00990099	6.59514e-11	0.627789	3.71361	FALSE	6414.04	0.346602	0.692167	1.6492	9.66158e-10
7839	Tb427-110016700	0	0.00990099	6.80259e-11	0.235308	4.62272	FALSE	2985.19	0.106042	0.898992	3.15507	9.95045e-10
6105	Tb427-090089900	0	0.00990099	7.0767e-11	0.744151	4.44084	FALSE	3454.1	0.130773	0.878607	3.29297	1.03358e-09
3703	Tb427-060051600	0	0.00990099	7.10092e-11	0.363875	3.72795	FALSE	3614.56	0.139782	0.865781	2.22951	1.03556e-09
5953	Tb427-090074600	0.001207	0.00990099	7.16034e-11	0.285327	3.95559	FALSE	11756.7	1.38846	0.18186	1.33244	1.04266e-09
9074	Tb427-110149600	0.000371362	0.00990099	7.39936e-11	0.649666	4.86876	FALSE	6423.18	0.341652	0.700412	1.85323	1.07424e-09
8056	Tb427-110038700	0	0.00990099	7.39713e-11	0.145654	3.63545	FALSE	6041.05	0.310649	0.722858	1.67091	1.07424e-09
6803	Tb427-100073300	0	0.00990099	7.48766e-11	0.43419	4.74065	FALSE	7883.24	0.502402	0.584746	1.52885	1.08543e-09
7378	Tb427-100134500	5.77885e-07	0.00990099	7.71063e-11	0.975603	4.79745	FALSE	9368.35	0.737512	0.432661	1.47348	1.11608e-09
6718	Tb427-100064600	0	0.00990099	8.49412e-11	0.179679	3.91519	FALSE	11267.8	1.214	0.232936	1.35682	1.22766e-09
5266	Tb427-080084600	0	0.00990099	8.55623e-11	0.634119	4.523	FALSE	4791.77	0.211736	0.808291	2.19587	1.2348e-09
4495	Tb427-070083700:pseudogene	0	0.00990099	8.63554e-11	0.90915	4.32302	FALSE	3623.82	0.138103	0.876317	2.1545	1.24439e-09
4439	Tb427-070078000	0	0.00990099	8.8091e-11	0.131009	4.66976	FALSE	6417.87	0.340988	0.708429	1.7932	1.26752e-09
7984	Tb427-110031400	0	0.00990099	9.19661e-11	0.749495	3.95375	FALSE	7301.64	0.429589	0.641319	1.86221	1.32131e-09
6970	Tb427-100091700	6.63873e-06	0.00990099	9.88234e-11	0.546022	3.77338	FALSE	8061.88	0.529589	0.560009	1.60025	1.41774e-09
4182	Tb427-070051200	0	0.00990099	1.0073e-10	0.482676	4.87941	FALSE	7420.43	0.446006	0.625057	1.9703	1.44296e-09
1911	Tb427-030016400	0	0.00990099	1.02432e-10	0.335608	3.87554	FALSE	3459.02	0.131122	0.876546	3.04528	1.46301e-09
5555	Tb427-090031700	0	0.00990099	1.02373e-10	0.768915	4.68365	FALSE	9706.82	0.789615	0.415483	1.47435	1.46301e-09
1666	Tb427-020019900	0	0.00990099	1.13185e-10	0.468601	3.65987	FALSE	3892.66	0.155718	0.850206	2.19658	1.61422e-09
3348	Tb427-060012400	0	0.00990099	1.1509e-10	0.847108	4.45869	FALSE	2219.15	0.06985	0.933578	5.61915	1.63897e-09
9434	Tb427-110185900	0	0.00990099	1.19839e-10	0.922022	3.96687	FALSE	7882.09	0.500338	0.58841	1.83109	1.7041e-09
1680	Tb427-020021300	0	0.00990099	1.22492e-10	0.886317	4.26007	FALSE	6378.66	0.339044	0.704306	2.06337	1.73929e-09
5214	Tb427-080078900	0	0.00990099	1.53546e-10	0.257172	4.56782	FALSE	4478.14	0.19125	0.821805	3.04819	2.17703e-09
6827	Tb427-100076900	0.00370287	0.00990099	1.57927e-10	0.775471	4.53268	FALSE	11857.2	1.43989	0.16995	1.30812	2.23587e-09
4821	Tb427-080038700	0	0.00990099	1.63944e-10	0.0326996	3.20472	FALSE	2538.84	0.0846598	0.917774	3.80018	2.31768e-09
6658	Tb427-100058500	0	0.00990099	1.75135e-10	0.729533	4.72651	FALSE	4451.93	0.190159	0.824095	3.44256	2.47229e-09
1332	Tb427-010011200	0	0.00990099	1.75798e-10	0.952413	4.30114	FALSE	1897.03	0.0586003	0.940907	4.03099	2.47804e-09
9382	Tb427-110180600	6.7901e-07	0.00990099	1.83529e-10	0.903024	4.67944	FALSE	2596.39	0.0862336	0.916628	2.67969	2.58325e-09
2035	Tb427-030030100	0	0.00990099	1.83884e-10	0.194157	4.03851	FALSE	3837.2	0.152244	0.8541	1.98284	2.58451e-09
3154	Tb427-050039300	0	0.00990099	1.91132e-10	0.0483096	3.83586	FALSE	3746.95	0.147453	0.857536	2.94223	2.68249e-09
3340	Tb427-060011600	0	0.00990099	1.98487e-10	0.66189	3.96941	FALSE	5200.6	0.23966	0.786532	1.93582	2.78169e-09
5341	Tb427-090008100	0	0.00990099	2.00398e-10	0.490716	3.81267	FALSE	2862.03	0.0997991	0.902657	3.47848	2.80441e-09
4094	Tb427-070042400	0	0.00990099	2.01119e-10	0.300194	3.30471	FALSE	7698.34	0.472886	0.613376	1.68753	2.81046e-09
4420	Tb427-070075900	0.311036	0.00990099	2.02038e-10	0.495944	1.00025	FALSE	17466.4	8.25103	0	1.01784	2.81922e-09
4064	Tb427-070039400	0	0.00990099	2.02761e-10	0.124963	4.40524	FALSE	4029.87	0.163248	0.845625	3.08335	2.82526e-09
1818	Tb427-030007100	2.26343e-05	0.00990099	2.04581e-10	0.56143	4.66378	FALSE	10223.8	0.880195	0.383646	1.47152	2.84653e-09
2112	Tb427-030039300	0	0.00990099	2.27387e-10	0.784107	1.85485	FALSE	3051.47	0.109583	0.892808	2.83194	3.15931e-09
4261	Tb427-070059100	0	0.00990099	2.34018e-10	0.0845871	4.37581	FALSE	6235.45	0.325101	0.716216	2.47928	3.2468e-09
8273	Tb427-110060800	0	0.00990099	2.37408e-10	0.732945	4.41442	FALSE	1829.9	0.0545929	0.946862	7.64453	3.28912e-09
4232	Tb427-070056200	0	0.00990099	2.42359e-10	0.941774	4.38035	FALSE	4759.64	0.209686	0.806917	1.83565	3.35293e-09
4307	Tb427-070063700	5.58999e-06	0.00990099	2.52924e-10	0.48945	3.92181	FALSE	11349.5	1.24191	0.2224	1.32576	3.4941e-09
5387	Tb427-090013700	0	0.00990099	2.59834e-10	0.330792	4.58714	FALSE	3332.37	0.123347	0.885937	2.82936	3.58445e-09
1767	Tb427-020030100	0	0.00990099	2.66406e-10	0.0223466	4.36844	FALSE	2537.85	0.0846908	0.918461	5.56532	3.6699e-09
3268	Tb427-050052300	0	0.00990099	2.72269e-10	0.296096	4.43217	FALSE	1163.45	0.0310542	0.969308	10.0498	3.74533e-09
7497	Tb427-100147000	0	0.00990099	2.78009e-10	0.151046	4.57427	FALSE	1769.83	0.0528442	0.947778	7.19645	3.81888e-09
6562	Tb427-100048900	0	0.00990099	2.85535e-10	0.809233	4.42027	FALSE	4154.02	0.173244	0.835089	2.37068	3.91671e-09
2719	Tb427-040046800:pseudogene	0	0.00990099	3.05704e-10	0.264502	2.37946	FALSE	3888.97	0.155284	0.8541	2.67943	4.18746e-09
2246	Tb427-030053600	0	0.00990099	3.21121e-10	0.245037	3.97155	FALSE	5407.13	0.259248	0.761338	1.67064	4.39243e-09
4651	Tb427-080021500	1.23027e-05	0.00990099	3.23899e-10	0.661129	2.25797	FALSE	12007.7	1.53556	0.14109	1.21091	4.42419e-09
3254	Tb427-050050900	0	0.00990099	3.26013e-10	0.335387	3.98903	FALSE	2592.4	0.0868176	0.915483	3.1531	4.4468e-09
5092	Tb427-080066600	0	0.00990099	3.31087e-10	0.0746436	3.51966	FALSE	6889.71	0.385038	0.675676	1.99572	4.50967e-09
3619	Tb427-060042600	0	0.00990099	3.69139e-10	0.953179	4.52776	FALSE	2332.01	0.0753296	0.926248	3.18438	5.02091e-09
1977	Tb427-030023000	0	0.00990099	3.76286e-10	0.060957	4.15949	FALSE	3305.05	0.122057	0.883417	2.65897	5.11095e-09
8608	Tb427-110094400	0	0.00990099	3.81973e-10	0.79281	4.89015	FALSE	3303.3	0.122267	0.883188	3.60123	5.18095e-09
3998	Tb427-070031000	3.87652e-06	0.00990099	3.90163e-10	0.76273	4.75682	FALSE	10011.7	0.874511	0.360284	1.4034	5.28464e-09
8938	Tb427-110135400	0	0.00990099	4.00828e-10	0.725518	1.94237	FALSE	5673.92	0.280059	0.746221	1.97457	5.42152e-09
5109	Tb427-080068300	0	0.00990099	4.06262e-10	0.153006	4.32394	FALSE	2993.31	0.106439	0.89716	4.67896	5.47973e-09
5558	Tb427-090032000	0	0.00990099	4.06195e-10	0.212497	4.32495	FALSE	6649.76	0.36518	0.684379	2.02107	5.47973e-09
1603	Tb427-020013300	0	0.00990099	4.32117e-10	0.769753	4.18641	FALSE	8420.14	0.575896	0.536418	1.45575	5.82037e-09
6025	Tb427-090081800	0	0.00990099	4.3531e-10	0.699685	4.96812	FALSE	6091.92	0.311582	0.733394	2.37211	5.85526e-09
5310	Tb427-090005000	0	0.00990099	4.48386e-10	0.795089	4.14775	FALSE	1183.48	0.0324622	0.967476	18.8802	6.01445e-09
7917	Tb427-110024600	0	0.00990099	4.47854e-10	0.255465	4.44141	FALSE	9666.27	0.781684	0.419148	1.79696	6.01445e-09
7587	Tb427-100156200	6.02456e-05	0.00990099	4.68799e-10	0.0811331	4.29145	FALSE	10427.8	0.973971	0.315621	1.34993	6.27958e-09
7275	Tb427-100124100	0	0.00990099	5.01999e-10	0.757773	4.05313	FALSE	3634.15	0.140176	0.865323	2.39488	6.71501e-09
9370	Tb427-110179400	0	0.00990099	5.11353e-10	0.755981	3.94074	FALSE	3986.02	0.160499	0.848145	3.12897	6.83072e-09
8705	Tb427-110105300	0	0.00990099	5.22687e-10	0.204908	4.33888	FALSE	2097.03	0.0655432	0.935639	6.76539	6.97251e-09
4116	Tb427-070044600	0	0.00990099	5.56055e-10	0.287736	4.57309	FALSE	3632.82	0.140742	0.862574	2.21869	7.40745e-09
5225	Tb427-080080000	0	0.00990099	5.65064e-10	0.389508	4.46724	FALSE	3508.81	0.132893	0.871965	2.38901	7.51714e-09
3577	Tb427-060038400	0	0.00990099	5.99066e-10	0.291574	4.40518	FALSE	2509.17	0.0833863	0.919377	5.93301	7.95359e-09
6225	Tb427-100014200	0	0.00990099	5.99512e-10	0.933841	4.32738	FALSE	2313.74	0.0745605	0.930142	3.10458	7.95359e-09
5734	Tb427-090050200	0	0.00990099	6.37936e-10	0.832138	3.41302	FALSE	3871.9	0.154231	0.850893	1.82129	8.45178e-09
9461	Tb427-110188600	0	0.00990099	6.38885e-10	0.0120702	1.00065	FALSE	3745	0.146857	0.857536	2.3413	8.45281e-09
6266	Tb427-100018300	0	0.00990099	6.52904e-10	0.643369	4.50846	FALSE	1945.47	0.0592023	0.941136	4.40579	8.62651e-09
2353	Tb427-040009000	1.79944e-07	0.00990099	6.68185e-10	0.441534	4.93265	FALSE	7602.79	0.466048	0.611544	1.96233	8.8164e-09
6614	Tb427-100054100	0	0.00990099	7.34015e-10	0.695346	3.70242	FALSE	4921.58	0.222722	0.792258	2.00691	9.67184e-09
2056	Tb427-030032200:pseudogene	0	0.00990099	7.54718e-10	0.717394	2.42313	FALSE	5271.15	0.246316	0.775996	1.73063	9.91769e-09
3356	Tb427-060013300	0	0.00990099	7.54149e-10	0.628773	3.85927	FALSE	5604.54	0.272101	0.757902	2.12175	9.91769e-09
4569	Tb427-080010900	0	0.00990099	7.69591e-10	0.705607	4.52118	FALSE	3647.95	0.141435	0.863949	3.76018	1.00994e-08
2240	Tb427-030053000	0	0.00990099	7.91383e-10	0.696182	4.27018	FALSE	3022.66	0.107314	0.897618	3.98212	1.03714e-08
6358	Tb427-100027900	0	0.00990099	8.03866e-10	0.316123	4.12681	FALSE	7231.13	0.425302	0.642235	1.76123	1.05208e-08
3444	Tb427-060023500	0	0.00990099	8.10146e-10	0.199782	3.89385	FALSE	3088.01	0.111342	0.89235	2.82211	1.05887e-08
8863	Tb427-110127600	0	0.00990099	8.2431e-10	0.286281	4.05004	FALSE	4022.89	0.163981	0.841732	1.93964	1.07593e-08
8614	Tb427-110095000	0	0.00990099	8.56836e-10	0.0838663	4.27783	FALSE	3453.57	0.129392	0.88044	2.8658	1.11688e-08
3199	Tb427-050043800	0	0.00990099	8.68418e-10	0.521797	4.77119	FALSE	1859.87	0.0568486	0.946175	15.7488	1.13046e-08
7311	Tb427-100127700	0	0.00990099	8.77559e-10	0.429373	4.28255	FALSE	6563.31	0.35622	0.689647	1.7468	1.14083e-08
3573	Tb427-060038000	0	0.00990099	9.10659e-10	0.0718387	4.52045	FALSE	4726.27	0.206963	0.811956	2.55882	1.18227e-08
4872	Tb427-080043900	0	0.00990099	9.29925e-10	0.366025	4.46249	FALSE	1637.32	0.0473752	0.953504	9.93958	1.20567e-08
6849	Tb427-100079100	0	0.00990099	9.32626e-10	0.517979	4.80624	FALSE	2180.08	0.0684137	0.934265	3.9503	1.20756e-08
6107	Tb427-090090100	0	0.00990099	9.87783e-10	0.0449566	4.1084	FALSE	5891.88	0.295433	0.73935	2.36885	1.27727e-08
2934	Tb427-050016400	1.28022e-06	0.00990099	1.00777e-09	0.547302	4.90898	FALSE	7455.56	0.450474	0.619789	2.40595	1.30138e-08
1701	Tb427-020023400	0	0.00990099	1.02067e-09	0.799001	3.60538	FALSE	5950.93	0.302815	0.728355	1.84712	1.31629e-08
8931	Tb427-110134700	0	0.00990099	1.04452e-09	0.953155	4.72107	FALSE	3417.57	0.127724	0.879982	2.49627	1.34525e-08
7000	Tb427-100094900	0	0.00990099	1.13695e-09	0.532477	4.94569	FALSE	3214.23	0.117737	0.886166	4.18272	1.46236e-08
7106	Tb427-100105500	0	0.00990099	1.18804e-09	0.737465	4.42307	FALSE	5404.41	0.259054	0.762941	2.59715	1.52604e-08
2419	Tb427-040015600	0	0.00990099	1.20431e-09	0.991669	4.37406	FALSE	9487.84	0.733003	0.455337	1.55428	1.54489e-08
3930	Tb427-070024000	0	0.00990099	1.20681e-09	0.262924	4.21831	FALSE	3794.14	0.149025	0.859597	2.09197	1.54605e-08
2600	Tb427-040033700	0	0.00990099	1.25257e-09	0.230164	4.25203	FALSE	2620.75	0.0884772	0.914567	3.69399	1.60256e-08
7517	Tb427-100149200	0	0.00990099	1.25611e-09	0.939432	4.40601	FALSE	2391.23	0.0780734	0.923271	6.68817	1.60497e-08
6149	Tb427-100006500	0	0.00990099	1.33647e-09	0.823598	4.20514	FALSE	8264.6	0.541925	0.572148	1.49331	1.7054e-08
4981	Tb427-080055500	0	0.00990099	1.34293e-09	0.706795	4.43951	FALSE	3236.48	0.118862	0.883646	2.18934	1.7114e-08
6449	Tb427-100037500	0	0.00990099	1.36129e-09	0.586214	1.0002	FALSE	6956.32	0.396983	0.658727	1.71332	1.73251e-08
2100	Tb427-030038100	0	0.00990099	1.36526e-09	0.988759	4.0903	FALSE	1759.89	0.052624	0.948236	8.63926	1.7353e-08
4231	Tb427-070056100	0	0.00990099	1.38109e-09	0.391439	4.37661	FALSE	3332.77	0.124431	0.881356	2.78203	1.75312e-08
4925	Tb427-080049200	0	0.00990099	1.4285e-09	0.381691	4.37344	FALSE	8032.6	0.517971	0.579249	1.71634	1.81092e-08
6045	Tb427-090083800	0	0.00990099	1.44848e-09	0.972954	4.27654	FALSE	4768.98	0.21031	0.80852	2.07017	1.83386e-08
5516	Tb427-090027800	0	0.00990099	1.46034e-09	0.297862	3.84403	FALSE	2949.36	0.103987	0.899679	3.07057	1.84647e-08
4471	Tb427-070081200	0	0.00990099	1.54298e-09	0.567732	4.4171	FALSE	4161.37	0.170651	0.841503	2.75407	1.94841e-08
1482	Tb427-010028500	0	0.00990099	1.68891e-09	0.579623	4.49616	FALSE	4757.64	0.210468	0.805772	1.94698	2.12991e-08
5873	Tb427-090064500	2.7255e-06	0.00990099	1.74022e-09	0.790939	4.7784	FALSE	9496.88	0.763279	0.417545	1.36464	2.19177e-08
9230	Tb427-110165200	0	0.00990099	1.77932e-09	0.539235	3.57199	FALSE	5477.52	0.263339	0.760651	2.10047	2.23812e-08
8759	Tb427-110110700	0	0.00990099	1.84297e-09	0.486274	3.4993	FALSE	3693.43	0.144739	0.859139	2.23674	2.31518e-08
7638	Tb427-100162000	0	0.00990099	1.8491e-09	0.505253	3.53474	FALSE	5897.99	0.298032	0.732707	1.94862	2.31986e-08
1314	Tb427-010009400	0	0.00990099	1.88547e-09	0.0958372	4.6668	FALSE	2263.26	0.072453	0.928997	6.14156	2.36244e-08
2051	Tb427-030031700	0	0.00990099	1.91894e-09	0.902273	4.24487	FALSE	3789.77	0.149476	0.857536	2.97417	2.40128e-08
3949	Tb427-070026100	6.92241e-06	0.00990099	1.92172e-09	0.986535	3.92741	FALSE	7693.76	0.479209	0.597343	1.68131	2.40166e-08
8432	Tb427-110076700	0	0.00990099	2.03319e-09	0.909371	4.1029	FALSE	3238.19	0.118787	0.883875	2.16286	2.5377e-08
3263	Tb427-050051800	3.10071e-07	0.00990099	2.05828e-09	0.834387	4.15312	FALSE	2307.02	0.0734135	0.929226	2.33587	2.56571e-08
1077	Tb427-000792500	5.2572e-07	0.00990099	2.07444e-09	0.796365	4.66187	FALSE	4443.5	0.188523	0.823866	2.54531	2.58253e-08
1407	Tb427-010020100	0	0.00990099	2.08391e-09	0.371501	3.87594	FALSE	5954.52	0.29935	0.739579	1.75739	2.59099e-08
3548	Tb427-060035500	0	0.00990099	2.20703e-09	0.957437	4.44053	FALSE	3495.68	0.131962	0.876088	3.932	2.74056e-08
7825	Tb427-110015300	2.53569e-06	0.00990099	2.24851e-09	0.0960972	2.63235	FALSE	2874.65	0.0993107	0.903573	2.22248	2.78849e-08
7066	Tb427-100101500	0	0.00990099	2.29319e-09	0.843733	4.71564	FALSE	7352.21	0.437028	0.63399	1.54357	2.84028e-08
4729	Tb427-080029400	0	0.00990099	2.45486e-09	0.883112	3.6407	FALSE	6139.43	0.31895	0.716674	2.01746	3.03664e-08
3752	Tb427-070005400	0	0.00990099	2.47285e-09	0.806065	3.93623	FALSE	7022.16	0.402455	0.656894	1.95405	3.055e-08
8284	Tb427-110061900	0	0.00990099	2.49153e-09	0.694476	3.88973	FALSE	4087.4	0.167875	0.841503	2.59532	3.07416e-08
6631	Tb427-100055800	0	0.00990099	2.5391e-09	0.511885	3.12115	FALSE	5014.11	0.228119	0.789968	1.70429	3.12887e-08
3401	Tb427-060018100	7.30003e-07	0.00990099	2.55756e-09	0.571545	4.08848	FALSE	10245.7	0.892317	0.371049	1.42064	3.14761e-08
8460	Tb427-110079500	0	0.00990099	2.56624e-09	0.369111	4.3821	FALSE	8328.88	0.565587	0.538708	1.79534	3.1543e-08
8815	Tb427-110122800	0	0.00990099	2.57469e-09	0.135279	2.45639	FALSE	7335.15	0.43393	0.636738	1.48551	3.16068e-08
7569	Tb427-100154400	0	0.00990099	2.65873e-09	0.938546	3.06375	FALSE	5977.99	0.307543	0.71759	1.57864	3.25972e-08
3164	Tb427-050040300	0	0.00990099	2.69403e-09	0.42442	3.8332	FALSE	4295.67	0.18175	0.824095	2.85566	3.29882e-08
4011	Tb427-070032300	0	0.00990099	2.732e-09	0.0200678	4.17171	FALSE	6512.71	0.350522	0.695144	1.81881	3.3411e-08
1285	Tb427-010006500	0	0.00990099	2.74839e-09	0.742083	4.65631	FALSE	8583.11	0.600452	0.520843	1.71313	3.35691e-08
3027	Tb427-050026200	6.71631e-05	0.00990099	2.76522e-09	0.941729	3.77575	FALSE	11369.6	1.21499	0.240266	1.29109	3.37322e-08
6538	Tb427-100046400	0	0.00990099	2.81181e-09	0.0806553	4.30997	FALSE	1637.7	0.0478866	0.951901	5.35879	3.42574e-08
4928	Tb427-080049500	0	0.00990099	2.81769e-09	0.988677	3.43667	FALSE	4417.4	0.187873	0.822721	1.89897	3.4286e-08
7605	Tb427-100158000	0	0.00990099	3.17295e-09	0.132894	3.2879	FALSE	3082.91	0.110726	0.89235	2.61975	3.85605e-08
2021	Tb427-030028700	0	0.00990099	3.29074e-09	0.518173	4.70415	FALSE	2223.49	0.071699	0.929455	6.26842	3.99419e-08
4435	Tb427-070077600	0	0.00990099	3.43721e-09	0.022809	3.88492	FALSE	5593.31	0.273276	0.752634	1.76155	4.16676e-08
7265	Tb427-100123100	0	0.00990099	3.49265e-09	0.807958	3.39805	FALSE	3206.68	0.117312	0.886395	3.00423	4.22867e-08
9384	Tb427-110180800	0	0.00990099	3.49766e-09	0.867798	4.34194	FALSE	2550.17	0.0847644	0.919377	4.75056	4.22946e-08
6697	Tb427-100062500	2.56232e-06	0.00990099	3.5193e-09	0.817622	3.55814	FALSE	9703.89	0.790341	0.412964	1.24617	4.25033e-08
1780	Tb427-020031400	0	0.00990099	3.59475e-09	0.904282	4.07404	FALSE	4584.37	0.198131	0.81585	3.03851	4.33605e-08
6749	Tb427-100067900	0	0.00990099	3.78036e-09	0.452607	4.25326	FALSE	4308.8	0.180245	0.830967	2.31793	4.55428e-08
8088	Tb427-110042100	3.05877e-05	0.00990099	4.01493e-09	0.0726897	4.86215	FALSE	11096.7	1.13022	0.269354	1.61981	4.83087e-08
3098	Tb427-050033700	0	0.00990099	4.05792e-09	0.925772	3.99834	FALSE	2782.25	0.0952109	0.90907	3.74088	4.87655e-08
7677	Tb427-100167100	0	0.00990099	4.14724e-09	0.899416	4.18299	FALSE	5715.52	0.281973	0.745763	1.88946	4.97771e-08
2492	Tb427-040022900	0	0.00990099	4.17833e-09	0.266472	3.96184	FALSE	3994.22	0.162227	0.842419	2.79627	5.00883e-08
4927	Tb427-080049400	0	0.00990099	4.35412e-09	0.820095	3.92424	FALSE	4074.82	0.16406	0.850664	1.86223	5.21312e-08
4968	Tb427-080053900	0	0.00990099	4.40534e-09	0.510391	4.31613	FALSE	3967.39	0.160098	0.848374	3.16219	5.26794e-08
7999	Tb427-110032900	0	0.00990099	4.48827e-09	0.584229	3.72407	FALSE	2657.07	0.0893578	0.915025	3.93804	5.3605e-08
4134	Tb427-070046400	0	0.00990099	4.97125e-09	0.402123	3.75641	FALSE	3559.37	0.136158	0.868301	2.35252	5.93004e-08
1730	Tb427-020026400	0	0.00990099	4.97867e-09	0.27905	4.14723	FALSE	6344.83	0.335699	0.704993	2.05153	5.93159e-08
2864	Tb427-050009300	0	0.00990099	5.21186e-09	0.254075	3.64068	FALSE	4428.14	0.188267	0.82524	2.03436	6.20179e-08
1769	Tb427-020030300	0	0.00990099	5.78454e-09	0.565386	3.98421	FALSE	4695.65	0.203892	0.815163	2.56013	6.87481e-08
7771	Tb427-110009800	0	0.00990099	6.02096e-09	0.894274	3.58028	FALSE	3397.07	0.127131	0.876775	2.00604	7.14703e-08
2029	Tb427-030029500	0	0.00990099	6.05167e-09	0.232822	3.49883	FALSE	3512	0.133188	0.871965	2.36918	7.1747e-08
1327	Tb427-010010700	0	0.00990099	6.32001e-09	0.155263	4.03309	FALSE	5803.13	0.287559	0.745763	1.91509	7.48369e-08
6316	Tb427-100023300	0	0.00990099	6.76608e-09	0.600144	4.6105	FALSE	2696.35	0.0929978	0.907238	3.04908	8.00213e-08
3559	Tb427-060036600	0	0.00990099	6.97441e-09	0.988092	3.65056	FALSE	5844.15	0.294643	0.733394	1.71744	8.23847e-08
3631	Tb427-060043800	3.75126e-07	0.00990099	7.06363e-09	0.475605	4.20905	FALSE	5469.12	0.261197	0.764086	1.99736	8.33371e-08
4460	Tb427-070080100	0	0.00990099	7.38756e-09	0.935223	4.31438	FALSE	2975.41	0.106208	0.896015	2.68072	8.7053e-08
6571	Tb427-100049800	0.000109272	0.00990099	7.51094e-09	0.998837	4.23495	FALSE	11150.1	1.17395	0.244388	1.22624	8.83994e-08
2274	Tb427-030056400	0	0.00990099	7.62699e-09	0.691011	4.28203	FALSE	3217.19	0.117292	0.886395	2.96672	8.96565e-08
6630	Tb427-100055700:pseudogene	0	0.00990099	7.88816e-09	0.84751	4.24232	FALSE	7401.13	0.436632	0.641777	1.94384	9.26143e-08
873	Tb427-000736100	0	0.00990099	7.96374e-09	0.291384	4.11938	FALSE	1275.83	0.0343619	0.965644	9.59594	9.33886e-08
7909	Tb427-110023800	0	0.00990099	8.08928e-09	0.997534	4.45004	FALSE	9081.07	0.680606	0.469995	1.46427	9.47462e-08
9226	Tb427-110164800	0	0.00990099	8.13046e-09	0.254304	4.30181	FALSE	3146.16	0.112997	0.893724	2.60397	9.51136e-08
6649	Tb427-100057600	0	0.00990099	8.1469e-09	0.124576	1.23595	FALSE	5873.63	0.296052	0.731333	1.71643	9.51912e-08
8566	Tb427-110090100	3.03728e-05	0.00990099	8.25981e-09	0.709873	4.16142	FALSE	3825.6	0.149416	0.859368	2.51962	9.63943e-08
1709	Tb427-020024300	4.33083e-07	0.00990099	8.47248e-09	0.126117	3.92361	FALSE	3399.84	0.126436	0.879524	2.80562	9.87573e-08
2109	Tb427-030039000	0	0.00990099	8.9026e-09	0.153859	4.55097	FALSE	3569.32	0.135783	0.871507	2.51006	1.03646e-07
8655	Tb427-110100100	0	0.00990099	9.00918e-09	0.31031	4.10835	FALSE	6126.35	0.318849	0.714155	1.87998	1.04761e-07
4014	Tb427-070032600	0	0.00990099	9.23456e-09	0.881786	4.12065	FALSE	4492.56	0.191086	0.823408	2.36414	1.07254e-07
2901	Tb427-050013100	0	0.00990099	9.72407e-09	0.732767	4.4298	FALSE	2985.84	0.105698	0.899221	4.54585	1.12758e-07
4752	Tb427-080031700	2.26768e-07	0.00990099	9.7317e-09	0.992844	4.20935	FALSE	3376.87	0.125631	0.877233	2.13199	1.12758e-07
9463	Tb427-110188800	0	0.00990099	9.96306e-09	0.0287544	4.0823	FALSE	3754.09	0.147197	0.859368	2.48697	1.153e-07
3742	Tb427-060056000	0	0.00990099	1.00524e-08	0.886327	4.15432	FALSE	2747.13	0.0937284	0.912048	3.52018	1.16195e-07
5533	Tb427-090029500	6.23116e-07	0.00990099	1.01754e-08	0.909836	3.55257	FALSE	2680.33	0.0899819	0.914567	2.10749	1.17338e-07
8406	Tb427-110074100	0	0.00990099	1.01681e-08	0.840009	1.00037	FALSE	3507.9	0.133666	0.869217	2.484	1.17338e-07
5020	Tb427-080059400	-1.7811e-07	0.00990099	1.0969e-08	0.348124	4.42766	FALSE	2597.12	0.0864348	0.916628	2.63767	1.26339e-07
9294	Tb427-110171600	0	0.00990099	1.10006e-08	0.121734	4.31257	FALSE	2570.89	0.0859218	0.915712	2.53416	1.26553e-07
8775	Tb427-110118800	0	0.00990099	1.1633e-08	0.989723	3.82199	FALSE	4190.52	0.173998	0.832341	1.93812	1.33669e-07
4795	Tb427-080036100	0	0.00990099	1.23091e-08	0.416666	4.1456	FALSE	2725.47	0.0928809	0.910215	2.62201	1.41271e-07
2263	Tb427-030055300	0.00335367	0.00990099	1.28651e-08	0.72157	3.87914	FALSE	12352.5	1.68973	0.11727	1.14943	1.47334e-07
7888	Tb427-110021700	0	0.00990099	1.28678e-08	0.178114	4.07425	FALSE	3636.3	0.14002	0.866239	3.04271	1.47334e-07
2601	Tb427-040033800	0	0.00990099	1.30462e-08	0.0950779	3.98039	FALSE	3015.07	0.106175	0.899908	3.71085	1.49201e-07
9449	Tb427-110187400	8.56038e-05	0.00990099	1.31577e-08	0.911948	4.07964	FALSE	9391.5	0.739108	0.43312	1.47436	1.50298e-07
527	Tb427-000578400:pseudogene	0	0.00990099	1.32352e-08	0.00716094	3.86305	FALSE	2182.41	0.0690459	0.933349	5.04383	1.51006e-07
4467	Tb427-070080800	0	0.00990099	1.33261e-08	0.823749	4.82749	FALSE	2339.39	0.0757419	0.928081	4.12646	1.51864e-07
7610	Tb427-100158500	0	0.00990099	1.36674e-08	0.650298	3.80171	FALSE	3930.09	0.156544	0.852955	2.42976	1.55571e-07
4794	Tb427-080036000	2.4758e-05	0.00990099	1.37829e-08	0.501266	4.37939	FALSE	10004	0.85862	0.375401	1.57853	1.56702e-07
3869	Tb427-070017300	0	0.00990099	1.43158e-08	0.0560713	3.66717	FALSE	4549.18	0.19549	0.819514	1.85449	1.62454e-07
7089	Tb427-100103800	0	0.00990099	1.43224e-08	0.766807	4.49299	FALSE	2438.89	0.080472	0.919377	5.11399	1.62454e-07
9279	Tb427-110170100	7.6939e-07	0.00990099	1.47731e-08	0.907535	4.76365	FALSE	5752.92	0.284093	0.745763	2.56297	1.67371e-07
6949	Tb427-100089200	0.000105036	0.00990099	1.50773e-08	0.246153	4.08936	FALSE	10926.1	1.0919	0.277371	1.3323	1.70618e-07
3804	Tb427-070010600	0	0.00990099	1.55264e-08	0.921302	4.33111	FALSE	1757.37	0.0517989	0.949382	5.6848	1.75496e-07
7133	Tb427-100108200	0	0.00990099	1.61634e-08	0.613376	4.5616	FALSE	2789.74	0.0968262	0.908383	5.1584	1.82483e-07
5745	Tb427-090051300	0	0.00990099	1.6812e-08	0.76473	4.15539	FALSE	2788.3	0.0957386	0.907467	3.42322	1.89584e-07
1855	Tb427-030010800	0	0.00990099	1.69582e-08	0.41552	4.03038	FALSE	7213.16	0.425297	0.639487	2.00989	1.91012e-07
8001	Tb427-110033100	0	0.00990099	1.74836e-08	0.869385	4.50709	FALSE	3289.68	0.120646	0.885937	2.60544	1.96701e-07
3729	Tb427-060054700	0	0.00990099	1.78045e-08	0.340926	4.12836	FALSE	5697.96	0.281271	0.743701	1.87224	2.00079e-07
7603	Tb427-100157800	0	0.00990099	1.84263e-08	0.528507	3.94599	FALSE	5596.35	0.271696	0.754466	2.14921	2.06827e-07
1539	Tb427-020006600	1.42623e-06	0.00990099	1.84556e-08	0.240347	1.90707	FALSE	3145.45	0.11297	0.890518	2.22505	2.06917e-07
2690	Tb427-040043300	0	0.00990099	1.95248e-08	0.951245	4.07289	FALSE	4028.82	0.162609	0.845167	2.17358	2.1865e-07
8554	Tb427-110088900	0	0.00990099	2.0677e-08	0.97138	3.68846	FALSE	3635.16	0.141155	0.863033	2.60867	2.31287e-07
5814	Tb427-090058200	0	0.00990099	2.15502e-08	0.77035	4.96507	FALSE	7068.23	0.403624	0.660559	2.64163	2.40776e-07
3604	Tb427-060041100	0	0.00990099	2.18878e-08	0.666067	4.31901	FALSE	3052.67	0.109188	0.895557	3.96642	2.44267e-07
8644	Tb427-110099000	2.96323e-06	0.00990099	2.21525e-08	0.729696	4.34836	FALSE	3701.78	0.142842	0.86372	2.17662	2.46937e-07
8204	Tb427-110053900	0	0.00990099	2.35565e-08	0.772229	4.22372	FALSE	4151.18	0.171083	0.837838	1.97274	2.62286e-07
4126	Tb427-070045600	0	0.00990099	2.3843e-08	0.439118	3.99856	FALSE	2664.41	0.0900902	0.910673	2.1792	2.65171e-07
1338	Tb427-010011800	0	0.00990099	2.44155e-08	0.327691	4.37434	FALSE	5559.09	0.267495	0.761567	1.90688	2.71227e-07
1468	Tb427-010027100	1.00743e-05	0.00990099	2.47801e-08	0.892559	4.75525	FALSE	9097.25	0.661769	0.499313	1.62559	2.74962e-07
8680	Tb427-110102600	0	0.00990099	2.5029e-08	0.787086	4.88684	FALSE	1627	0.0467531	0.955108	5.06019	2.77407e-07
8110	Tb427-110044300	0	0.00990099	2.58035e-08	0.224394	3.82878	FALSE	3833.8	0.151486	0.854329	1.93424	2.85665e-07
1607	Tb427-020013700	0	0.00990099	2.81514e-08	0.0571271	4.05691	FALSE	2859.97	0.098411	0.908841	4.44561	3.11303e-07
3179	Tb427-050041800	2.0496e-07	0.00990099	2.92295e-08	0.00271986	3.88426	FALSE	2619.7	0.0875807	0.915025	2.18806	3.22857e-07
8415	Tb427-110075000	2.58317e-05	0.00990099	3.02481e-08	0.853519	4.71244	FALSE	8923.48	0.646504	0.496564	1.69094	3.33727e-07
5431	Tb427-090018900	1.57393e-06	0.00990099	3.04151e-08	0.376116	4.59554	FALSE	2269.48	0.0717339	0.931516	3.86003	3.35188e-07
6453	Tb427-100037900	0	0.00990099	3.20476e-08	0.257713	3.17097	FALSE	2421.17	0.0785172	0.924874	3.28027	3.52778e-07
35	Tb427-000014400	0.000275231	0.00990099	3.34664e-08	0.998467	4.52047	FALSE	11632.3	1.26094	0.240953	1.21394	3.67979e-07
8320	Tb427-110065500	0	0.00990099	3.54563e-08	0.29914	3.0627	FALSE	5029.44	0.229905	0.785616	1.77032	3.89417e-07
5343	Tb427-090008300	0	0.00990099	3.58366e-08	0.295149	4.19464	FALSE	2081	0.0643426	0.936555	3.96842	3.93149e-07
1678	Tb427-020021100	0	0.00990099	3.59679e-08	0.752757	3.62031	FALSE	4188.2	0.172826	0.835089	1.74751	3.94143e-07
9058	Tb427-110147800	6.64251e-07	0.00990099	3.60562e-08	0.583483	4.09347	FALSE	3190.89	0.115675	0.887082	2.38093	3.94665e-07
1862	Tb427-030011500	0	0.00990099	3.85093e-08	0.865192	4.22256	FALSE	3154.9	0.114571	0.88754	2.61457	4.21041e-07
8382	Tb427-110071700	0	0.00990099	3.91135e-08	0.835519	3.57382	FALSE	3052.87	0.108854	0.893953	3.53601	4.27165e-07
1653	Tb427-020018600	1.30149e-06	0.00990099	4.1747e-08	0.983499	3.65882	FALSE	5278.69	0.248713	0.76798	1.55087	4.55085e-07
7535	Tb427-100151000	2.41744e-06	0.00990099	4.17639e-08	0.0527166	3.95931	FALSE	6973.36	0.392466	0.669721	1.71076	4.55085e-07
2297	Tb427-030058700	9.55484e-07	0.00990099	4.18422e-08	0.448311	2.90856	FALSE	9065.05	0.674821	0.475492	1.34909	4.55428e-07
5409	Tb427-090016200	2.19399e-05	0.00990099	4.2737e-08	0.966619	3.83913	FALSE	7027.13	0.404399	0.649565	1.55034	4.64285e-07
7831	Tb427-110015900	1.89549e-08	0.00990099	4.27518e-08	0.474252	4.19637	FALSE	4490.45	0.192115	0.818598	1.72009	4.64285e-07
1863	Tb427-030011600	0	0.00990099	4.28776e-08	0.189482	3.24851	FALSE	4606.17	0.200619	0.814246	2.13035	4.65131e-07
3520	Tb427-060032700	0	0.00990099	4.30513e-08	0.418175	4.41012	FALSE	3183.66	0.115279	0.892579	2.80095	4.66494e-07
4567	Tb427-080010700	0	0.00990099	4.39581e-08	0.610167	2.93304	FALSE	5182.81	0.240593	0.780348	1.99523	4.75787e-07
8789	Tb427-110120200	3.47793e-07	0.00990099	4.40148e-08	0.726381	3.93584	FALSE	4071.33	0.164617	0.845854	2.69843	4.7587e-07
2631	Tb427-040037200	0	0.00990099	4.63844e-08	0.420304	4.2341	FALSE	3122.56	0.112517	0.890976	2.40782	5.0093e-07
4688	Tb427-080025300	0	0.00990099	4.67821e-08	0.603717	3.95711	FALSE	4671.78	0.202848	0.816308	2.82587	5.04664e-07
7743	Tb427-110007000	0	0.00990099	4.75144e-08	0.112628	3.73351	FALSE	2721	0.092787	0.911131	3.66167	5.11994e-07
3175	Tb427-050041400	3.30108e-08	0.00990099	4.80642e-08	0.634738	4.30981	FALSE	1448.54	0.0399311	0.960834	4.43669	5.17344e-07
6818	Tb427-100076000	0	0.00990099	4.88886e-08	0.753656	4.90679	FALSE	1930.17	0.0581927	0.942968	5.80573	5.25634e-07
1448	Tb427-010024300	1.00898e-07	0.00990099	5.08857e-08	0.825421	3.83712	FALSE	4018.58	0.161676	0.847229	2.36543	5.465e-07
6702	Tb427-100063000	0	0.00990099	5.16028e-08	0.552493	1.86751	FALSE	4144.87	0.168978	0.843335	2.12285	5.52977e-07
8861	Tb427-110127400	0	0.00990099	5.15856e-08	0.392121	4.32569	FALSE	2663.47	0.0899994	0.912048	2.4465	5.52977e-07
1686	Tb427-020021900	0	0.00990099	5.68223e-08	0.778313	4.15781	FALSE	7570.99	0.462994	0.613376	1.67294	6.08237e-07
8386	Tb427-110072100	0	0.00990099	5.72901e-08	0.746995	3.67546	FALSE	2652.09	0.090089	0.910215	2.77395	6.12569e-07
7169	Tb427-100113000	0	0.00990099	6.1217e-08	0.905719	4.17915	FALSE	4996.61	0.226765	0.791571	2.50359	6.53835e-07
2688	Tb427-040043100	2.95065e-06	0.00990099	6.17696e-08	0.529657	4.58585	FALSE	2485.31	0.0816096	0.919148	3.09276	6.59011e-07
4733	Tb427-080029800	0	0.00990099	6.38877e-08	0.331901	4.45957	FALSE	5979.14	0.302658	0.732707	1.90236	6.8086e-07
4964	Tb427-080053500	0	0.00990099	6.39843e-08	0.345408	4.36683	FALSE	3187.44	0.115579	0.889372	2.71764	6.81141e-07
5872	Tb427-090064400	0	0.00990099	6.59254e-08	0.871217	3.96156	FALSE	2280.68	0.0736414	0.926935	3.84986	7.01036e-07
2044	Tb427-030031000	5.9484e-07	0.00990099	6.75176e-08	0.205541	4.07447	FALSE	4455.39	0.188841	0.824095	1.81973	7.17181e-07
5785	Tb427-090055300	0	0.00990099	6.86115e-08	0.502279	3.08477	FALSE	3787.24	0.149211	0.856848	2.12379	7.27207e-07
5950	Tb427-090072800	0.000248358	0.00990099	6.859e-08	0.352812	4.68309	FALSE	9189.75	0.685956	0.475951	1.58527	7.27207e-07
2409	Tb427-040014600	1.30972e-06	0.00990099	6.9049e-08	0.64511	4.16542	FALSE	8391.82	0.572059	0.535044	1.44431	7.31045e-07
3446	Tb427-060023700	0	0.00990099	7.14066e-08	0.754612	3.66397	FALSE	3279.01	0.120769	0.883188	1.97036	7.55181e-07
5979	Tb427-090077200	0	0.00990099	7.16222e-08	0.61657	3.65338	FALSE	3666.61	0.142758	0.862116	2.69327	7.56636e-07
7090	Tb427-100103900:pseudogene	7.06588e-07	0.00990099	7.20746e-08	0.906897	4.23581	FALSE	2718.33	0.0923727	0.90907	2.21855	7.60587e-07
1890	Tb427-030014300	3.46302e-06	0.00990099	7.30186e-08	0.360309	3.48796	FALSE	3039.37	0.10752	0.896473	2.58688	7.69711e-07
6991	Tb427-100094000	0	0.00990099	7.35768e-08	0.447908	3.53904	FALSE	8478.4	0.581767	0.533669	1.5563	7.74753e-07
9426	Tb427-110185100	2.7329e-07	0.00990099	7.5753e-08	0.375364	4.94939	FALSE	8492.2	0.56656	0.560925	2.18266	7.96475e-07
4656	Tb427-080022000	0	0.00990099	7.5804e-08	0.690092	4.70963	FALSE	3025.75	0.107983	0.895328	2.61402	7.96476e-07
6341	Tb427-100026200	0	0.00990099	7.63372e-08	0.837285	4.50405	FALSE	3675.23	0.141411	0.868301	3.51978	8.01211e-07
3038	Tb427-050027300	1.11989e-06	0.00990099	7.73121e-08	0.654345	3.64932	FALSE	5245.15	0.243694	0.779203	2.0322	8.10565e-07
4235	Tb427-070056500	0	0.00990099	7.76974e-08	0.377213	4.05799	FALSE	2599.41	0.08706	0.91388	3.99146	8.13725e-07
4540	Tb427-080008000	0	0.00990099	8.04452e-08	0.0124215	3.92738	FALSE	4447.69	0.189641	0.823866	2.74723	8.41594e-07
3965	Tb427-070027700	0	0.00990099	8.30975e-08	0.35114	4.10174	FALSE	3322.66	0.122692	0.882272	3.6238	8.68405e-07
9338	Tb427-110176000	5.02986e-07	0.00990099	8.82442e-08	0.555541	4.22804	FALSE	3870.92	0.153129	0.853642	2.62506	9.21198e-07
3157	Tb427-050039600	0	0.00990099	8.95168e-08	0.799615	4.25705	FALSE	2930.83	0.1026	0.900596	2.8979	9.33477e-07
1647	Tb427-020018000	5.78807e-07	0.00990099	9.02721e-08	0.13156	3.26996	FALSE	3497.84	0.132278	0.872423	2.39753	9.40342e-07
7821	Tb427-110014900	3.46788e-06	0.00990099	9.19662e-08	0.863692	3.96673	FALSE	7573.1	0.464896	0.607879	1.60007	9.56961e-07
8478	Tb427-110081300	0	0.00990099	9.31396e-08	0.682243	3.87308	FALSE	3692.68	0.143861	0.861887	1.992	9.68133e-07
3261	Tb427-050051600	2.8835e-06	0.00990099	9.60942e-08	0.310675	4.52869	FALSE	5728.54	0.28229	0.745076	1.72046	9.97774e-07
4482	Tb427-070082300	0	0.00990099	9.80059e-08	0.374957	4.23757	FALSE	2828.48	0.0977868	0.905176	2.38745	1.01654e-06
2149	Tb427-030043000	1.89174e-06	0.00990099	9.83208e-08	0.739735	4.1693	FALSE	2096.23	0.0644016	0.938158	4.06133	1.01871e-06
4814	Tb427-080038000	2.47705e-06	0.00990099	1.01567e-07	0.866609	3.03458	FALSE	2520.87	0.0829952	0.917774	2.64859	1.05123e-06
8101	Tb427-110043400	1.34374e-06	0.00990099	1.05737e-07	0.771885	3.00613	FALSE	4433.92	0.188158	0.822492	1.74084	1.09321e-06
2816	Tb427-040056700	0	0.00990099	1.07419e-07	0.360972	3.84896	FALSE	3487.82	0.131416	0.875172	2.73203	1.10942e-06
2310	Tb427-030060000	0	0.00990099	1.10791e-07	0.875959	1.00077	FALSE	5714.36	0.279871	0.750344	1.67193	1.14303e-06
1641	Tb427-020017400	9.0362e-07	0.00990099	1.12809e-07	0.160682	4.57057	FALSE	2168.76	0.0674947	0.934494	4.1157	1.16262e-06
6860	Tb427-100080200	1.81921e-06	0.00990099	1.13175e-07	0.788676	3.29902	FALSE	3744.04	0.14571	0.860742	2.25391	1.16515e-06
5163	Tb427-080073800	1.47795e-05	0.00990099	1.13792e-07	0.0623304	4.56671	FALSE	6906.26	0.389268	0.665369	1.58954	1.17026e-06
3208	Tb427-050044700	7.95122e-07	0.00990099	1.17789e-07	0.444184	4.22265	FALSE	3897.16	0.154694	0.852268	2.03134	1.21009e-06
8696	Tb427-110104400	3.07055e-06	0.00990099	1.21255e-07	0.648555	4.37817	FALSE	6043.11	0.307628	0.727668	1.65529	1.24438e-06
1476	Tb427-010027900:pseudogene	0	0.00990099	1.22383e-07	0.71037	4.3855	FALSE	3605.54	0.138257	0.867842	3.05238	1.25462e-06
674	Tb427-000666100	0.043192	0.00990099	1.28624e-07	0.725887	3.81634	FALSE	12125	1.64351	0.111315	1.22892	1.31721e-06
8686	Tb427-110103200	0	0.00990099	1.29163e-07	0.388678	3.83717	FALSE	3174.8	0.115857	0.886853	2.55356	1.32133e-06
5733	Tb427-090050100	1.53039e-06	0.00990099	1.31195e-07	0.252282	3.7479	FALSE	7442.79	0.451049	0.616354	1.68308	1.3407e-06
1654	Tb427-020018700	0	0.00990099	1.35153e-07	0.783277	3.85388	FALSE	5485.4	0.26292	0.762483	1.99771	1.3797e-06
528	Tb427-000578500:pseudogene	1.30254e-06	0.00990099	1.37621e-07	0.153278	3.74491	FALSE	958.986	0.0240348	0.975034	6.46318	1.40341e-06
5290	Tb427-080087000	2.29101e-06	0.00990099	1.39304e-07	0.0685128	3.43611	FALSE	4681.21	0.204314	0.808978	1.68358	1.41909e-06
9337	Tb427-110175900	0	0.00990099	1.41414e-07	0.593561	3.01551	FALSE	3058.13	0.109616	0.894869	3.0238	1.43907e-06
7797	Tb427-110012500	0	0.00990099	1.45467e-07	0.203847	4.62031	FALSE	3175.36	0.114648	0.890289	3.35729	1.47876e-06
4543	Tb427-080008300	1.23496e-06	0.00990099	1.45777e-07	0.520484	2.65413	FALSE	5932.64	0.300035	0.730188	1.58766	1.48036e-06
4860	Tb427-080042700	5.77736e-06	0.00990099	1.49794e-07	0.235461	4.23899	FALSE	3370.3	0.124528	0.880669	1.9279	1.51956e-06
1340	Tb427-010012000	-1.51855e-07	0.00990099	1.52318e-07	0.787585	4.42091	FALSE	7953.96	0.508569	0.582913	1.43932	1.54355e-06
6170	Tb427-100008600	0.000348519	0.00990099	1.53953e-07	0.716978	3.48867	FALSE	10103.1	0.881846	0.363491	1.3379	1.55849e-06
5536	Tb427-090029800	7.73408e-07	0.00990099	1.54933e-07	0.883383	4.19163	FALSE	5826.32	0.290106	0.741182	1.78997	1.56677e-06
1740	Tb427-020027400	7.01326e-07	0.00990099	1.57646e-07	0.941644	1.00004	FALSE	6450.29	0.345642	0.695373	1.53912	1.59255e-06
2569	Tb427-040030600	0	0.00990099	1.58868e-07	0.833328	4.39821	FALSE	3788.08	0.147928	0.860742	3.07298	1.60323e-06
7466	Tb427-100143700	0	0.00990099	1.6101e-07	0.652652	4.06454	FALSE	2614.78	0.0878375	0.914567	3.39824	1.62316e-06
5323	Tb427-090006300	0	0.00990099	1.66772e-07	0.0416976	1.00029	FALSE	7913.99	0.51288	0.567339	1.51402	1.6795e-06
2764	Tb427-040051300:pseudogene	5.95463e-07	0.00990099	1.68363e-07	0.160423	4.038	FALSE	3890.96	0.154311	0.853413	1.81909	1.69376e-06
6313	Tb427-100023000	0	0.00990099	1.77358e-07	0.0322788	4.02533	FALSE	4428.85	0.188829	0.820889	1.77907	1.78241e-06
9285	Tb427-110170700	0	0.00990099	1.78035e-07	0.711005	3.50722	FALSE	3577.98	0.136785	0.868301	2.21713	1.78735e-06
4091	Tb427-070042100	0	0.00990099	1.80106e-07	0.547077	4.0167	FALSE	2398.78	0.0778254	0.924187	2.32365	1.80447e-06
7486	Tb427-100145900	0	0.00990099	1.80112e-07	0.0907324	3.8003	FALSE	7075.12	0.408141	0.651397	1.64766	1.80447e-06
2279	Tb427-030056900	2.09354e-07	0.00990099	1.89585e-07	0.284461	4.47329	FALSE	5715.86	0.281388	0.747137	1.92226	1.89742e-06
8121	Tb427-110045400	0	0.00990099	1.90942e-07	0.467674	4.26897	FALSE	3840.54	0.15125	0.856848	1.89712	1.90903e-06
7523	Tb427-100149800	0.000115642	0.00990099	1.96833e-07	0.611761	4.64498	FALSE	8597.47	0.598215	0.523362	1.87219	1.9659e-06
9251	Tb427-110167300	0	0.00990099	1.97367e-07	0.488485	4.75819	FALSE	2612.77	0.088774	0.915483	5.43133	1.96921e-06
2294	Tb427-030058400	0	0.00990099	1.99401e-07	0.90205	3.86013	FALSE	6302.7	0.333786	0.703161	1.97571	1.98726e-06
6997	Tb427-100094600	5.97122e-06	0.00990099	1.99586e-07	0.61714	2.94565	FALSE	5303.47	0.249629	0.768896	1.67323	1.98726e-06
4726	Tb427-080029100	2.79437e-07	0.00990099	2.09109e-07	0.967128	4.19809	FALSE	3611.65	0.137505	0.870591	3.5346	2.07994e-06
3572	Tb427-060037900	7.35307e-07	0.00990099	2.09996e-07	0.843626	4.75849	FALSE	3323.44	0.122321	0.883646	3.08657	2.08448e-06
8257	Tb427-110059200	0	0.00990099	2.09964e-07	0.251914	4.29333	FALSE	2592.37	0.0866277	0.915025	3.48081	2.08448e-06
676	Tb427-000667900	0.111273	0.00990099	2.11348e-07	0.824186	3.13412	FALSE	13082.4	2.37416	0.0279432	1.13	2.09576e-06
5291	Tb427-080087100	0	0.00990099	2.15436e-07	0.514745	3.5149	FALSE	3405.47	0.126961	0.878607	1.91339	2.13411e-06
7349	Tb427-100131500	0	0.00990099	2.23281e-07	0.0280507	3.4633	FALSE	3002.97	0.106877	0.89464	2.38158	2.20957e-06
7152	Tb427-100110100	2.2622e-07	0.00990099	2.24565e-07	0.919093	4.00129	FALSE	5290.56	0.247441	0.774851	1.97736	2.22001e-06
7531	Tb427-100150600	1.28182e-06	0.00990099	2.26878e-07	0.486796	2.81976	FALSE	3709.65	0.143575	0.862803	1.95123	2.24059e-06
6357	Tb427-100027800:pseudogene	5.20429e-06	0.00990099	2.32194e-07	0.213633	4.86067	FALSE	6375.91	0.334905	0.711864	1.70839	2.29076e-06
2578	Tb427-040031500	5.50716e-07	0.00990099	2.35128e-07	0.321467	4.00845	FALSE	4728.84	0.206729	0.809437	1.58296	2.31735e-06
3315	Tb427-060009100	2.25589e-07	0.00990099	2.45059e-07	0.0862833	3.59211	FALSE	1903.98	0.0570923	0.944114	4.08504	2.41277e-06
4343	Tb427-070067500	0	0.00990099	2.47405e-07	0.220719	3.93194	FALSE	3881.59	0.152368	0.860055	3.01974	2.4334e-06
1459	Tb427-010025700	0.218988	0.00990099	2.53947e-07	0.685153	1.18525	FALSE	16253.3	6.10758	0	1.02805	2.49379e-06
3679	Tb427-060049000	0	0.00990099	2.54059e-07	0.560422	1.00058	FALSE	6356.16	0.334708	0.71049	1.75131	2.49379e-06
1943	Tb427-030019600	0	0.00990099	2.6682e-07	0.212021	4.64672	FALSE	2861.08	0.0992852	0.904031	3.64718	2.6164e-06
2579	Tb427-040031600	0	0.00990099	2.68806e-07	0.239044	2.97539	FALSE	4257.96	0.177578	0.831425	2.17857	2.63321e-06
2448	Tb427-040018500	0	0.00990099	2.69087e-07	0.638302	4.48616	FALSE	2895.18	0.100923	0.90197	2.45525	2.63331e-06
6832	Tb427-100077400	0	0.00990099	2.71044e-07	0.0451556	4.80207	FALSE	5579.47	0.268712	0.761109	2.54006	2.64978e-06
6035	Tb427-090082800	0	0.00990099	2.74485e-07	0.566711	1.9831	FALSE	3856.78	0.153179	0.852268	2.28157	2.68072e-06
5063	Tb427-080063700	0	0.00990099	2.79912e-07	0.649414	4.25088	FALSE	4267.88	0.177703	0.832341	2.30565	2.73098e-06
7996	Tb427-110032600	1.06353e-06	0.00990099	2.80307e-07	0.337273	4.6765	FALSE	2881.34	0.10041	0.901283	2.35309	2.73207e-06
5655	Tb427-090042300	0	0.00990099	2.82363e-07	0.938276	3.83405	FALSE	5321.32	0.248291	0.779661	2.0733	2.74935e-06
2211	Tb427-030049700	1.09353e-06	0.00990099	2.91812e-07	0.236152	3.86936	FALSE	5056.13	0.230409	0.787907	1.97633	2.83567e-06
3079	Tb427-050031800	1.51188e-07	0.00990099	2.9177e-07	0.949949	3.81813	FALSE	3074.22	0.108976	0.897618	3.13663	2.83567e-06
3021	Tb427-050025600	1.55563e-05	0.00990099	3.09615e-07	0.843455	4.27437	FALSE	8050.66	0.520944	0.573294	1.7728	3.00484e-06
5302	Tb427-080088400	5.9488e-05	0.00990099	3.09841e-07	0.131971	4.21259	FALSE	10258.1	0.911093	0.352955	1.44689	3.00484e-06
8975	Tb427-110139200	0	0.00990099	3.1126e-07	0.506186	4.6167	FALSE	2428.9	0.0794836	0.922355	3.25053	3.01558e-06
9005	Tb427-110142200	6.32751e-07	0.00990099	3.25836e-07	0.139015	2.96148	FALSE	4825.34	0.214302	0.80142	1.64599	3.15365e-06
7143	Tb427-100109200	6.04531e-07	0.00990099	3.27098e-07	0.940651	4.72193	FALSE	3334.2	0.121807	0.892579	2.59588	3.16271e-06
4825	Tb427-080039100	0	0.00990099	3.36966e-07	0.246341	4.1484	FALSE	7723.38	0.479319	0.604443	1.5016	3.25488e-06
1891	Tb427-030014400	1.28054e-05	0.00990099	3.40019e-07	0.21713	3.44512	FALSE	2371.88	0.0765734	0.922813	2.77548	3.27899e-06
6754	Tb427-100068400:pseudogene	4.90475e-07	0.00990099	3.40138e-07	0.989414	3.52959	FALSE	3551.8	0.134697	0.872423	2.3015	3.27899e-06
5726	Tb427-090049400	0	0.00990099	3.42378e-07	0.985699	2.92894	FALSE	3191.24	0.115856	0.888227	2.24448	3.2973e-06
1359	Tb427-010013900	0	0.00990099	3.49621e-07	0.961852	4.17742	FALSE	6259.53	0.328441	0.710719	2.18461	3.36372e-06
4171	Tb427-070050100	0.00311178	0.00990099	3.55821e-07	0.626248	4.40453	FALSE	10570	0.969042	0.339212	1.32381	3.41997e-06
9133	Tb427-110155500	1.86648e-05	0.00990099	3.59605e-07	0.237307	3.61618	FALSE	5173.69	0.240422	0.774622	1.71059	3.45292e-06
3053	Tb427-050029200	0	0.00990099	3.60281e-07	0.0452279	3.68153	FALSE	3470.39	0.131013	0.87311	2.115	3.45599e-06
3033	Tb427-050026800	5.69255e-06	0.00990099	3.69729e-07	0.62857	4.3843	FALSE	1839.08	0.0540803	0.946633	4.66752	3.54312e-06
9245	Tb427-110166700	1.02955e-06	0.00990099	3.71863e-07	0.647335	3.86754	FALSE	3458.5	0.129396	0.876546	2.40527	3.56005e-06
8749	Tb427-110109700	0	0.00990099	3.765e-07	0.804317	3.05637	FALSE	3352.6	0.125055	0.879753	2.58883	3.60089e-06
8792	Tb427-110120500	2.39015e-06	0.00990099	3.83922e-07	0.289135	3.23381	FALSE	2916.47	0.101918	0.899679	2.46959	3.66825e-06
9122	Tb427-110154400	5.62905e-08	0.00990099	3.8779e-07	0.520388	3.82731	FALSE	5003.98	0.228786	0.7847	1.70182	3.70156e-06
1660	Tb427-020019300	0	0.00990099	3.89592e-07	0.645497	4.25765	FALSE	2509.2	0.0832687	0.918232	5.8443	3.71511e-06
5821	Tb427-090058900	2.30667e-07	0.00990099	3.92198e-07	0.0659372	4.40813	FALSE	5487.62	0.262308	0.764315	1.76483	3.73628e-06
7565	Tb427-100154000	5.38888e-07	0.00990099	3.96294e-07	0.0248351	3.23833	FALSE	4114.65	0.16784	0.840357	1.87105	3.7716e-06
7698	Tb427-100169200	0	0.00990099	4.03121e-07	0.976045	3.81197	FALSE	3484.4	0.131784	0.871965	2.82742	3.83281e-06
2574	Tb427-040031100	-2.6095e-07	0.00990099	4.04714e-07	0.162648	3.94936	FALSE	3303.34	0.121114	0.884563	2.13378	3.84419e-06
7913	Tb427-110024200	2.65977e-05	0.00990099	4.06395e-07	0.798667	4.25622	FALSE	2127.85	0.0652941	0.938158	2.74294	3.85638e-06
4472	Tb427-070081300	0	0.00990099	4.09735e-07	0.624638	4.17646	FALSE	2262.68	0.0718334	0.929684	3.60306	3.88427e-06
9125	Tb427-110154700	6.09541e-06	0.00990099	4.161e-07	0.873306	3.92493	FALSE	3735.43	0.144534	0.86372	2.73006	3.94075e-06
4257	Tb427-070058700	2.0623e-07	0.00990099	4.17616e-07	0.546925	4.37579	FALSE	3194.13	0.115159	0.890747	2.17074	3.95126e-06
4301	Tb427-070063100	7.00455e-08	0.00990099	4.19566e-07	0.40489	4.3148	FALSE	2506.73	0.0824571	0.919835	3.60123	3.96584e-06
4157	Tb427-070048700	0	0.00990099	4.2266e-07	0.657725	3.97434	FALSE	3461.58	0.129925	0.877004	2.28689	3.9912e-06
9270	Tb427-110169200	0	0.00990099	4.24662e-07	0.921999	4.83521	FALSE	3929.7	0.156151	0.855016	2.7767	4.0062e-06
8917	Tb427-110133300	1.33469e-05	0.00990099	4.28334e-07	0.359091	2.15786	FALSE	9734.54	0.790005	0.417087	1.2851	4.03691e-06
9283	Tb427-110170500	8.96022e-07	0.00990099	4.54087e-07	0.23318	4.54723	FALSE	1471.04	0.0407509	0.960147	5.42927	4.27547e-06
3093	Tb427-050033200	0	0.00990099	4.58671e-07	0.583473	2.89658	FALSE	3662.18	0.141631	0.863949	2.20286	4.31444e-06
1292	Tb427-010007200	3.64553e-06	0.00990099	4.6825e-07	0.11195	3.6314	FALSE	2822.8	0.0966206	0.907238	2.0281	4.40028e-06
1345	Tb427-010012500	2.323e-06	0.00990099	4.69024e-07	0.198107	4.04562	FALSE	3706.91	0.141946	0.868759	2.00008	4.40329e-06
3342	Tb427-060011800	0	0.00990099	4.71422e-07	0.416071	4.36919	FALSE	3870.78	0.153416	0.855245	2.02462	4.42152e-06
6413	Tb427-100033600	4.66577e-05	0.00990099	4.71944e-07	0.333954	4.69419	FALSE	6904.36	0.385401	0.672698	1.85351	4.42213e-06
2490	Tb427-040022700	5.83886e-05	0.00990099	4.84996e-07	0.142401	4.13355	FALSE	9557.27	0.750433	0.441136	1.28832	4.54005e-06
2174	Tb427-030045700	4.10132e-06	0.00990099	4.95873e-07	0.822898	4.8036	FALSE	4403.01	0.184976	0.829134	2.36051	4.63292e-06
8829	Tb427-110124200	0	0.00990099	4.9559e-07	0.0285978	4.25755	FALSE	5187.54	0.240875	0.780577	1.75476	4.63292e-06
4246	Tb427-070057600	4.87973e-07	0.00990099	4.97358e-07	0.53884	3.50059	FALSE	3051.95	0.108273	0.896473	2.507	4.64232e-06
2634	Tb427-040037500	4.41567e-05	0.00990099	5.11149e-07	0.874749	4.37386	FALSE	3344.51	0.12296	0.88273	2.44874	4.76646e-06
6572	Tb427-100049900	0	0.00990099	5.13241e-07	0.225955	4.16759	FALSE	3524.33	0.132595	0.876546	3.19732	4.78137e-06
2458	Tb427-040019500	0	0.00990099	5.16881e-07	0.082435	1.00033	FALSE	3240.71	0.119111	0.881814	2.45327	4.81067e-06
5237	Tb427-080081200	0	0.00990099	5.35107e-07	0.775981	4.66737	FALSE	2433.01	0.0793753	0.924416	5.42078	4.97552e-06
5889	Tb427-090066100	3.15691e-05	0.00990099	5.39939e-07	0.00920474	3.86501	FALSE	8888.93	0.635383	0.508016	1.26974	5.01564e-06
3018	Tb427-050025300	-1.18952e-07	0.00990099	5.4171e-07	0.439459	1.00016	FALSE	5518.8	0.26538	0.758818	1.66943	5.02727e-06
4204	Tb427-070053400	1.09917e-06	0.00990099	5.47667e-07	0.925094	3.72273	FALSE	3287.09	0.120475	0.883875	2.413	5.0777e-06
4553	Tb427-080009300	5.32072e-07	0.00990099	5.68621e-07	0.525824	4.52844	FALSE	7089.4	0.411799	0.645213	1.54431	5.26694e-06
4715	Tb427-080028000	0	0.00990099	5.7077e-07	0.385245	3.58003	FALSE	4680.42	0.204786	0.809208	2.07229	5.2818e-06
2730	Tb427-040047900	0	0.00990099	5.73974e-07	0.121297	1.00019	FALSE	4989.74	0.225564	0.792258	1.84331	5.30639e-06
1384	Tb427-010016500:pseudogene	0	0.00990099	5.834e-07	0.811847	3.55487	FALSE	3260.25	0.119252	0.884792	2.93156	5.3884e-06
7428	Tb427-100139500	0	0.00990099	5.85906e-07	0.218666	3.7217	FALSE	2722.24	0.0932287	0.908383	4.03595	5.40639e-06
9275	Tb427-110169700	1.83548e-06	0.00990099	5.87027e-07	0.180237	4.42803	FALSE	3875.19	0.152766	0.855474	1.93346	5.41159e-06
8986	Tb427-110140300	6.60812e-07	0.00990099	5.93136e-07	0.464829	3.96763	FALSE	2390.19	0.0774032	0.923958	2.30518	5.46271e-06
9217	Tb427-110163900	8.08439e-07	0.00990099	5.99082e-07	0.95942	3.86191	FALSE	6764.34	0.376699	0.672927	1.78545	5.50179e-06
4185	Tb427-070051500	0	0.00990099	5.9883e-07	0.124841	1.00011	FALSE	2790.65	0.0962525	0.904947	2.77222	5.50179e-06
8905	Tb427-110132100	0	0.00990099	5.98779e-07	0.301919	4.08961	FALSE	2597.13	0.0867332	0.917316	2.52048	5.50179e-06
6444	Tb427-100037000	0	0.00990099	6.07477e-07	0.947118	1.00009	FALSE	6278.66	0.32856	0.711406	1.6736	5.57362e-06
8702	Tb427-110105000	9.51037e-06	0.00990099	6.08574e-07	0.319208	3.4854	FALSE	2414.68	0.0780607	0.9235	2.87413	5.57841e-06
4958	Tb427-080052900	1.249e-05	0.00990099	6.0939e-07	0.108263	3.45621	FALSE	6833.49	0.384068	0.665369	1.47683	5.58061e-06
3259	Tb427-050051400	1.65603e-06	0.00990099	6.10648e-07	0.910003	3.95964	FALSE	2492.27	0.0818771	0.918232	2.12993	5.58685e-06
5543	Tb427-090030500	0	0.00990099	6.19971e-07	0.832902	3.70654	FALSE	2658.47	0.0896141	0.912506	2.62132	5.6668e-06
2990	Tb427-050022300	2.88155e-05	0.00990099	6.39212e-07	0.692494	4.60518	FALSE	5889.15	0.293737	0.740037	2.01071	5.83717e-06
8866	Tb427-110127900	0	0.00990099	6.42293e-07	0.949802	3.7279	FALSE	2529.35	0.0834439	0.919148	3.10669	5.85979e-06
3120	Tb427-050035900	0.000142809	0.00990099	6.42912e-07	0.771844	4.73561	FALSE	5697.08	0.280471	0.743014	2.10586	5.85993e-06
8117	Tb427-110045000	0	0.00990099	6.49289e-07	0.65567	3.81806	FALSE	2819.94	0.0970272	0.906551	3.13836	5.91249e-06
9002	Tb427-110141900	5.3581e-06	0.00990099	6.62653e-07	0.241792	3.42536	FALSE	4566.78	0.195776	0.81814	1.58216	6.02852e-06
114	Tb427-000108500	0	0.00990099	6.73362e-07	0.18534	4.33493	FALSE	950.205	0.0236968	0.977554	13.3897	6.12021e-06
9410	Tb427-110183500	5.44542e-06	0.00990099	6.94379e-07	0.69272	3.59288	FALSE	3832.16	0.150461	0.856848	2.26867	6.30533e-06
2720	Tb427-040046900	0.00228922	0.00990099	7.03321e-07	0.600372	3.33421	FALSE	10667.9	1.03769	0.287448	1.23035	6.38055e-06
1405	Tb427-010019900	2.11216e-06	0.00990099	7.04624e-07	0.035511	4.86319	FALSE	5563.15	0.269389	0.75607	1.93783	6.3864e-06
1868	Tb427-030012100	0	0.00990099	7.05391e-07	0.298072	3.85263	FALSE	3241.78	0.117935	0.887769	3.03411	6.38738e-06
1685	Tb427-020021800	7.4316e-06	0.00990099	7.13865e-07	0.402832	2.80429	FALSE	8702.74	0.610822	0.520614	1.32669	6.45616e-06
2921	Tb427-050015100	0	0.00990099	7.14318e-07	0.591582	4.71942	FALSE	1767.82	0.0515613	0.950527	3.73603	6.45616e-06
4264	Tb427-070059400:pseudogene	7.80912e-07	0.00990099	7.42697e-07	0.830887	4.16808	FALSE	4251.8	0.175039	0.838525	1.95591	6.7064e-06
1912	Tb427-030016500	6.29396e-05	0.00990099	7.58125e-07	0.92838	4.53829	FALSE	5723.81	0.280725	0.747595	1.77668	6.83935e-06
8561	Tb427-110089600	0	0.00990099	8.16008e-07	0.847133	4.24979	FALSE	4455.32	0.189179	0.823408	1.92951	7.35469e-06
574	Tb427-000636500:pseudogene	0.000298345	0.00990099	8.17697e-07	0.679834	3.59281	FALSE	1245.31	0.0325423	0.969079	4.65825	7.36307e-06
9407	Tb427-110183200	1.94148e-06	0.00990099	8.19428e-07	0.960041	2.18368	FALSE	6557.44	0.354449	0.692167	1.52198	7.37181e-06
6904	Tb427-100084700	2.25665e-06	0.00990099	8.33036e-07	0.504751	3.44137	FALSE	5647.39	0.273536	0.757444	1.52038	7.48729e-06
6720	Tb427-100064800	0.000109539	0.00990099	8.44975e-07	0.729978	3.77632	FALSE	10299.2	0.894124	0.377004	1.32263	7.58757e-06
5948	Tb427-090072600	7.68417e-07	0.00990099	8.55202e-07	0.138791	3.11211	FALSE	4114.92	0.167295	0.843106	2.1706	7.67229e-06
4834	Tb427-080040100	9.23586e-05	0.00990099	8.56116e-07	0.718672	3.58088	FALSE	7796.38	0.488721	0.595282	1.33145	7.6734e-06
9140	Tb427-110156200	2.57997e-07	0.00990099	8.78619e-07	0.740397	4.03254	FALSE	2997.36	0.105483	0.898534	2.02207	7.86781e-06
8317	Tb427-110065200	0	0.00990099	8.89954e-07	0.455911	3.78518	FALSE	1962.85	0.0593986	0.942281	4.31829	7.96197e-06
8313	Tb427-110064800	0	0.00990099	9.00432e-07	0.454587	4.76467	FALSE	1589.65	0.0449485	0.956253	4.59221	8.04829e-06
6150	Tb427-100006600	1.92202e-05	0.00990099	9.23793e-07	0.128526	4.56769	FALSE	1062.98	0.0269119	0.972057	11.4754	8.24949e-06
1505	Tb427-010031200	1.5395e-05	0.00990099	9.42158e-07	0.982842	4.75383	FALSE	8127.13	0.53267	0.564361	1.47766	8.40575e-06
8202	Tb427-110053700	3.70311e-07	0.00990099	9.5113e-07	0.446989	3.25544	FALSE	5145.76	0.236885	0.783326	1.6743	8.47799e-06
2509	Tb427-040024600	1.87822e-05	0.00990099	9.57326e-07	0.588039	3.78053	FALSE	7267.01	0.427313	0.637884	1.59709	8.52539e-06
9243	Tb427-110166500	1.93379e-05	0.00990099	9.90137e-07	0.406428	3.95116	FALSE	3246.73	0.117333	0.88983	2.5743	8.8095e-06
8543	Tb427-110087800	4.16278e-07	0.00990099	9.97099e-07	0.868958	4.41903	FALSE	5264.52	0.246469	0.773935	1.70227	8.8633e-06
4172	Tb427-070050200	8.01285e-06	0.00990099	1.00593e-06	0.7301	3.66612	FALSE	5160.12	0.237163	0.783097	1.95374	8.93359e-06
6540	Tb427-100046600	1.98171e-06	0.00990099	1.0542e-06	0.876072	4.11891	FALSE	2351.06	0.0750621	0.927623	3.24788	9.35376e-06
9472	Tb427-110189700	0.000488374	0.00990099	1.0623e-06	0.812491	3.40692	FALSE	4138.18	0.168598	0.839441	1.9061	9.41698e-06
5398	Tb427-090015100	5.87497e-06	0.00990099	1.0748e-06	0.816723	4.38432	FALSE	4266.05	0.175406	0.839212	1.88634	9.51909e-06
42	Tb427-000015200:pseudogene	2.23783e-05	0.00990099	1.08776e-06	0.700795	3.9488	FALSE	8589.91	0.582224	0.549015	1.61087	9.62512e-06
3625	Tb427-060043200	5.74826e-07	0.00990099	1.09018e-06	0.0097088	2.8565	FALSE	4619.36	0.200491	0.812185	1.90995	9.63771e-06
3420	Tb427-060020000	0	0.00990099	1.10101e-06	0.138833	3.95688	FALSE	2603.98	0.0867539	0.916399	4.22758	9.72461e-06
9163	Tb427-110158500	5.14145e-07	0.00990099	1.11591e-06	0.0463386	3.28512	FALSE	5597.04	0.271124	0.754695	1.72208	9.84719e-06
9255	Tb427-110167700	0	0.00990099	1.15065e-06	0.298723	4.86785	FALSE	3671.36	0.141207	0.867842	3.10822	1.01445e-05
6725	Tb427-100065300	0	0.00990099	1.16308e-06	0.835674	3.99753	FALSE	2576.7	0.0858142	0.916628	2.44525	1.02448e-05
1816	Tb427-030006900	0.00723912	0.00990099	1.18754e-06	0.0838278	2.97476	FALSE	12239.1	1.64919	0.122767	1.16505	1.04508e-05
2820	Tb427-040057100	2.08166e-06	0.00990099	1.19546e-06	0.133617	4.00512	FALSE	4492.46	0.19262	0.815621	2.56137	1.05109e-05
3450	Tb427-060024100	1.50233e-05	0.00990099	1.19909e-06	0.561928	4.06222	FALSE	3586.03	0.136885	0.866697	2.13257	1.05333e-05
5853	Tb427-090062500	6.01289e-06	0.00990099	1.26315e-06	0.34174	4.36162	FALSE	2735.17	0.0927342	0.909528	3.93577	1.1086e-05
1513	Tb427-010032000	0	0.00990099	1.30027e-06	0.0227513	4.60949	FALSE	2251.1	0.0710758	0.931516	5.2447	1.14015e-05
4977	Tb427-080054800	9.46491e-07	0.00990099	1.30403e-06	0.690446	3.81548	FALSE	3386.49	0.125622	0.88044	2.91164	1.14241e-05
2318	Tb427-040005500	0	0.00990099	1.31275e-06	0.0794716	2.02762	FALSE	4421.66	0.188792	0.819514	2.04782	1.14902e-05
5378	Tb427-090012800	4.20636e-05	0.00990099	1.31812e-06	0.875112	3.3248	FALSE	7624.01	0.46044	0.62437	1.5134	1.15267e-05
7776	Tb427-110010300	6.4349e-07	0.00990099	1.33043e-06	0.977967	4.03863	FALSE	3573.3	0.135941	0.870362	2.06301	1.16239e-05
6178	Tb427-100009400	0	0.00990099	1.36121e-06	0.171868	4.56726	FALSE	4175.25	0.171798	0.838754	1.88804	1.18821e-05
7223	Tb427-100118400	0	0.00990099	1.39696e-06	0.330216	4.3474	FALSE	2337.12	0.0748445	0.927393	5.46159	1.21832e-05
8582	Tb427-110091700	5.63192e-06	0.00990099	1.45609e-06	0.236642	4.40725	FALSE	1604.1	0.0452345	0.95694	9.80584	1.26875e-05
8122	Tb427-110045500	2.79522e-05	0.00990099	1.46189e-06	0.13343	3.41564	FALSE	5389.14	0.254205	0.769583	1.73591	1.27266e-05
7261	Tb427-100122700	3.79863e-06	0.00990099	1.48323e-06	0.309173	3.62864	FALSE	3322.29	0.122787	0.879295	2.00654	1.28945e-05
7440	Tb427-100140700	2.24262e-05	0.00990099	1.48384e-06	0.148019	4.12928	FALSE	6634	0.35863	0.693312	1.85755	1.28945e-05
4400	Tb427-070073300	0	0.00990099	1.4892e-06	0.929413	4.66883	FALSE	2456.04	0.0803956	0.921667	7.02097	1.29295e-05
8895	Tb427-110131100	8.39703e-06	0.00990099	1.57428e-06	0.224211	2.63846	FALSE	7560.19	0.460573	0.614521	1.40302	1.3656e-05
2341	Tb427-040007800	9.17523e-06	0.00990099	1.57676e-06	0.994585	4.68288	FALSE	4845.19	0.214684	0.802565	2.01449	1.36652e-05
7942	Tb427-110027200	0.00405584	0.00990099	1.58051e-06	0.494052	4.27775	FALSE	9213.71	0.701679	0.456711	1.24871	1.36855e-05
857	Tb427-000729100	0.343983	0.00990099	1.61713e-06	0.201058	2.60276	FALSE	13660.1	3.00693	0.00435181	1.06008	1.39777e-05
6628	Tb427-100055500	1.22242e-06	0.00990099	1.61597e-06	0.885512	3.96389	FALSE	3455.13	0.128931	0.877462	2.4525	1.39777e-05
4040	Tb427-070037000	6.01457e-06	0.00990099	1.62075e-06	0.493092	3.9181	FALSE	4801.71	0.211558	0.805314	1.92548	1.3984e-05
4906	Tb427-080047300	2.70273e-06	0.00990099	1.61943e-06	0.756787	3.42432	FALSE	2578.99	0.0857885	0.915254	2.88159	1.3984e-05
4851	Tb427-080041800	4.49111e-07	0.00990099	1.6559e-06	0.288793	4.37956	FALSE	4500.86	0.193088	0.816995	2.902	1.42746e-05
2479	Tb427-040021600	2.57395e-05	0.00990099	1.67151e-06	0.424364	4.25818	FALSE	6509.24	0.348443	0.697206	1.45973	1.43877e-05
4353	Tb427-070068500	1.95596e-06	0.00990099	1.67199e-06	0.895063	3.08668	FALSE	3657	0.140491	0.865781	2.02214	1.43877e-05
5497	Tb427-090025900	1.74457e-06	0.00990099	1.68193e-06	0.906547	2.24219	FALSE	3997.17	0.160369	0.848374	1.93851	1.44605e-05
4364	Tb427-070069600	9.70382e-06	0.00990099	1.68956e-06	0.512296	3.68554	FALSE	3378.43	0.125254	0.878836	2.39185	1.45073e-05
4993	Tb427-080056700	8.22594e-06	0.00990099	1.69038e-06	0.440958	3.88702	FALSE	4512.56	0.192219	0.820431	2.29703	1.45073e-05
8585	Tb427-110092000	0	0.00990099	1.72419e-06	0.823085	2.67056	FALSE	2964.99	0.104291	0.898992	2.25226	1.47845e-05
2323	Tb427-040006000	6.99846e-07	0.00990099	1.72587e-06	0.728144	4.10548	FALSE	4765.45	0.209616	0.805543	2.4944	1.47857e-05
3607	Tb427-060041400	1.61932e-05	0.00990099	1.73556e-06	0.237838	3.97545	FALSE	7197.16	0.423827	0.633761	1.70789	1.48557e-05
2519	Tb427-040025600	1.0791e-05	0.00990099	1.82105e-06	0.512369	4.51269	FALSE	6227.63	0.320902	0.724462	1.79218	1.55737e-05
6799	Tb427-100072900	7.4028e-06	0.00990099	1.83081e-06	0.758775	4.45378	FALSE	5837.72	0.290112	0.740953	1.88889	1.56433e-05
8278	Tb427-110061300	2.68856e-05	0.00990099	1.84791e-06	0.126696	3.6665	FALSE	3463.09	0.130007	0.87311	1.96178	1.57756e-05
7628	Tb427-100161000	9.95192e-07	0.00990099	1.89515e-06	0.67827	3.87021	FALSE	4058.7	0.164595	0.842877	2.07089	1.61646e-05
7368	Tb427-100133500:pseudogene	1.07386e-06	0.00990099	1.89938e-06	0.480051	3.84067	FALSE	3085.69	0.109511	0.896244	3.21486	1.61864e-05
9271	Tb427-110169300	0.000107839	0.00990099	1.90187e-06	0.712534	4.06316	FALSE	4329.97	0.180046	0.831883	1.74105	1.61935e-05
9165	Tb427-110158700	5.17474e-05	0.00990099	1.92275e-06	0.614511	4.27277	FALSE	9522.72	0.74552	0.444114	1.55706	1.63568e-05
1452	Tb427-010024700	0	0.00990099	1.95257e-06	0.0543022	4.6838	FALSE	5674.38	0.276636	0.755612	3.04142	1.6596e-05
3136	Tb427-050037500	2.56829e-05	0.00990099	1.98298e-06	0.679542	4.00889	FALSE	6096.5	0.311907	0.724004	1.98316	1.68397e-05
5351	Tb427-090009100	4.13841e-06	0.00990099	1.99186e-06	0.484724	4.29927	FALSE	2173.34	0.0674127	0.935181	3.62185	1.69003e-05
6808	Tb427-100074200	1.30748e-07	0.00990099	2.00625e-06	0.37762	4.13372	FALSE	2276.66	0.0721549	0.929913	3.70968	1.70075e-05
4152	Tb427-070048200	0	0.00990099	2.04392e-06	0.765121	4.36605	FALSE	1767.24	0.0517858	0.948236	3.30115	1.73117e-05
7468	Tb427-100143900	6.83743e-07	0.00990099	2.06e-06	0.158329	2.84889	FALSE	2780.9	0.0950621	0.907925	2.52901	1.74327e-05
5894	Tb427-090066600	2.21701e-06	0.00990099	2.0755e-06	0.527044	4.11638	FALSE	2084.49	0.0639334	0.937471	4.02259	1.75415e-05
7312	Tb427-100127800	8.00647e-07	0.00990099	2.07647e-06	0.992586	1.00021	FALSE	8285.24	0.554113	0.551764	1.41871	1.75415e-05
4321	Tb427-070065100	7.84658e-07	0.00990099	2.09382e-06	0.763759	3.81207	FALSE	1855.62	0.0548945	0.947549	5.40378	1.76726e-05
7950	Tb427-110028000	6.96362e-06	0.00990099	2.13196e-06	0.176687	4.18395	FALSE	2125.63	0.065415	0.936555	3.79011	1.79789e-05
3056	Tb427-050029500	8.48738e-06	0.00990099	2.14186e-06	0.404051	3.9656	FALSE	3063.3	0.108633	0.894869	2.74397	1.80467e-05
4659	Tb427-080022300	1.15539e-06	0.00990099	2.14599e-06	0.0503853	4.29826	FALSE	4528.95	0.19124	0.828905	2.50937	1.80658e-05
7905	Tb427-110023400	0	0.00990099	2.15959e-06	0.123584	3.28366	FALSE	2220.28	0.0700787	0.931745	3.14595	1.81646e-05
4133	Tb427-070046300	2.22381e-06	0.00990099	2.16324e-06	0.530532	3.61257	FALSE	2858.28	0.0988138	0.903573	2.97336	1.81795e-05
5915	Tb427-090069100	0	0.00990099	2.1991e-06	0.407305	3.18506	FALSE	3265.1	0.118959	0.887311	2.63251	1.84648e-05
5265	Tb427-080084500	7.88435e-07	0.00990099	2.21057e-06	0.875107	4.2897	FALSE	9182.72	0.680079	0.487403	1.48377	1.85451e-05
5638	Tb427-090040300	2.08777e-05	0.00990099	2.22183e-06	0.240623	3.71501	FALSE	4903.99	0.219679	0.795236	1.49802	1.86234e-05
7619	Tb427-100160100	9.80684e-05	0.00990099	2.27294e-06	0.418885	4.66332	FALSE	7274.77	0.428705	0.635822	1.69599	1.90354e-05
6233	Tb427-100015000	0.00353385	0.00990099	2.27687e-06	0.921236	3.04216	FALSE	10559.4	0.997666	0.308978	1.29181	1.90519e-05
5947	Tb427-090072500	4.98119e-07	0.00990099	2.30415e-06	0.317349	3.70565	FALSE	2960.28	0.103681	0.900137	2.91124	1.92635e-05
4538	Tb427-080007800	0	0.00990099	2.31425e-06	0.0338406	4.0433	FALSE	2355.8	0.0757865	0.926019	2.56744	1.93313e-05
6671	Tb427-100059800	0	0.00990099	2.35297e-06	0.526293	1.00003	FALSE	3204.27	0.11675	0.885708	2.39886	1.96378e-05
9182	Tb427-110160400	0.000104149	0.00990099	2.35646e-06	0.847608	4.13937	FALSE	9684.6	0.789569	0.411361	1.31052	1.965e-05
2261	Tb427-030055100	2.08045e-07	0.00990099	2.4344e-06	0.563393	3.85781	FALSE	2739.56	0.0930365	0.910444	3.31645	2.02825e-05
3948	Tb427-070026000	5.73664e-06	0.00990099	2.49604e-06	0.0308513	3.52443	FALSE	8074.63	0.522932	0.573523	1.48399	2.07604e-05
8048	Tb427-110037900	0	0.00990099	2.49601e-06	0.917632	3.71123	FALSE	5975.3	0.302365	0.732478	1.84982	2.07604e-05
1466	Tb427-010026900	0	0.00990099	2.51287e-06	0.535827	4.12287	FALSE	7092.55	0.407158	0.656436	1.52288	2.08646e-05
4213	Tb427-070054300	7.80532e-06	0.00990099	2.5116e-06	0.938609	3.86747	FALSE	3538.34	0.133953	0.87082	1.69052	2.08646e-05
3307	Tb427-060008300	0.000231355	0.00990099	2.52407e-06	0.461375	4.43881	FALSE	7194.23	0.415546	0.649794	1.95025	2.09396e-05
1799	Tb427-030005200	8.21089e-06	0.00990099	2.52812e-06	0.803809	3.83018	FALSE	3949.25	0.157533	0.84929	2.50005	2.09553e-05
3275	Tb427-050053000	4.39713e-06	0.00990099	2.54683e-06	0.563921	4.08266	FALSE	4805.98	0.213029	0.800504	2.29103	2.10924e-05
6235	Tb427-100015200	2.5253e-06	0.00990099	2.56397e-06	0.159502	4.0116	FALSE	7783.9	0.478332	0.615208	1.43261	2.12162e-05
710	Tb427-000677400	3.2928e-06	0.00990099	2.57084e-06	0.710789	3.34117	FALSE	4598.88	0.197913	0.816537	2.12604	2.12549e-05
8871	Tb427-110128400	5.90117e-05	0.00990099	2.73382e-06	0.977505	3.79209	FALSE	4310.11	0.179231	0.831425	1.87772	2.25831e-05
8967	Tb427-110138400	1.35477e-05	0.00990099	2.74747e-06	0.51419	3.94617	FALSE	2599.6	0.0858729	0.918461	3.1201	2.26765e-05
5528	Tb427-090029000	0.000152075	0.00990099	2.77857e-06	0.305091	4.37997	FALSE	7622.98	0.468958	0.606734	1.35182	2.29138e-05
8572	Tb427-110090700	0	0.00990099	2.8632e-06	0.612321	1.00021	FALSE	2701.94	0.0912501	0.912277	2.69856	2.35916e-05
8404	Tb427-110073900	6.17307e-06	0.00990099	2.8679e-06	0.741176	4.46618	FALSE	3216.76	0.115788	0.891434	2.8175	2.36103e-05
6638	Tb427-100056500	1.8193e-05	0.00990099	2.88215e-06	0.0258159	4.19428	FALSE	5576.66	0.269514	0.75607	1.53452	2.37075e-05
1608	Tb427-020013800	1.45595e-05	0.00990099	2.88629e-06	0.930932	4.44688	FALSE	1706.07	0.0488868	0.952359	5.09178	2.37214e-05
6009	Tb427-090080200	0.0042815	0.00990099	2.89175e-06	0.274811	2.94722	FALSE	11091.2	1.16939	0.238662	1.23767	2.37461e-05
3962	Tb427-070027400	8.12575e-06	0.00990099	3.00178e-06	0.996027	4.34098	FALSE	2226.92	0.0700784	0.9306	2.59962	2.46288e-05
1900	Tb427-030015300	1.2924e-06	0.00990099	3.04239e-06	0.699331	4.03081	FALSE	5262.12	0.243041	0.783097	1.63239	2.49409e-05
2459	Tb427-040019600	0.000105008	0.00990099	3.06838e-06	0.886045	4.17011	FALSE	1564.85	0.0435339	0.957398	2.84509	2.51327e-05
1768	Tb427-020030200	0.000109373	0.00990099	3.07379e-06	0.205386	4.51179	FALSE	4216.01	0.173803	0.834631	2.10377	2.51558e-05
6712	Tb427-100064000	8.64221e-07	0.00990099	3.20967e-06	0.599983	3.86896	FALSE	2742.72	0.0936217	0.907238	1.99922	2.62457e-05
9006	Tb427-110142300	3.67985e-05	0.00990099	3.21507e-06	0.503356	4.06004	FALSE	4424.81	0.186224	0.825928	1.65053	2.62677e-05
5689	Tb427-090045700	3.21508e-06	0.00990099	3.26887e-06	0.586788	3.37723	FALSE	5356.64	0.25273	0.769583	1.80923	2.66847e-05
6534	Tb427-100046000	0	0.00990099	3.42966e-06	0.628725	3.9158	FALSE	3754.61	0.14583	0.864178	3.35945	2.79738e-05
5392	Tb427-090014500	1.31458e-06	0.00990099	3.48773e-06	0.991607	1.95941	FALSE	6128.35	0.315947	0.718965	1.60815	2.84236e-05
3050	Tb427-050028900	2.91023e-06	0.00990099	3.54842e-06	0.487856	3.6427	FALSE	2884.86	0.100013	0.902886	1.97773	2.88938e-05
5157	Tb427-080073200	4.83616e-05	0.00990099	3.58375e-06	0.783478	4.52937	FALSE	4341.79	0.1801	0.834631	2.28651	2.9157e-05
6502	Tb427-100042800	3.67833e-06	0.00990099	3.63306e-06	0.13318	4.11182	FALSE	4454.88	0.189232	0.821118	1.94333	2.95335e-05
1894	Tb427-030014700	4.31008e-06	0.00990099	3.6545e-06	0.803408	4.03001	FALSE	6531.58	0.348371	0.70339	1.87007	2.96828e-05
9090	Tb427-110151200	0.000281543	0.00990099	3.65938e-06	0.0471292	4.09066	FALSE	4515.24	0.191535	0.822492	2.16499	2.96976e-05
9248	Tb427-110167000	0	0.00990099	3.71141e-06	0.98586	4.59049	FALSE	1852.95	0.0549297	0.946862	3.96321	3.00947e-05
4455	Tb427-070079600	1.75252e-05	0.00990099	3.744e-06	0.585794	4.42853	FALSE	3779.14	0.146591	0.862803	2.3169	3.03336e-05
7406	Tb427-100137300	2.3603e-06	0.00990099	3.76081e-06	0.982501	3.27847	FALSE	3473.29	0.130292	0.874943	2.26103	3.04444e-05
1276	Tb427-010005600	0	0.00990099	3.78788e-06	0.104024	4.64958	FALSE	2507.21	0.0828653	0.921209	3.70489	3.06379e-05
2568	Tb427-040030500:pseudogene	2.0957e-06	0.00990099	3.87785e-06	0.359986	4.11668	FALSE	5750.01	0.282777	0.747824	2.1151	3.13395e-05
5308	Tb427-080089000:pseudogene	2.06848e-05	0.00990099	3.90273e-06	0.336728	3.28128	FALSE	3790.28	0.147578	0.859597	1.94316	3.15143e-05
6255	Tb427-100017200:pseudogene	1.57717e-05	0.00990099	3.90598e-06	0.780943	3.66085	FALSE	5407.24	0.256303	0.766835	1.60947	3.15143e-05
4248	Tb427-070057800	6.15772e-05	0.00990099	3.94727e-06	0.333863	4.16927	FALSE	4532.82	0.193458	0.819743	2.3873	3.1821e-05
5797	Tb427-090056500	6.67765e-06	0.00990099	4.09013e-06	0.558286	4.58063	FALSE	6432.83	0.339437	0.709116	2.01277	3.29453e-05
2451	Tb427-040018800	4.66258e-05	0.00990099	4.14406e-06	0.0339692	4.20463	FALSE	6035.78	0.305342	0.731562	1.90931	3.3341e-05
5772	Tb427-090054000	3.15498e-06	0.00990099	4.14614e-06	0.780849	3.72505	FALSE	3294.59	0.12063	0.884333	2.22968	3.3341e-05
3895	Tb427-070019900	1.10009e-06	0.00990099	4.21416e-06	0.982449	3.77913	FALSE	2430.57	0.0791839	0.921667	2.89663	3.38599e-05
3716	Tb427-060052900	0.000238581	0.00990099	4.24208e-06	0.377652	3.57583	FALSE	8744.83	0.620656	0.508933	1.41336	3.40561e-05
6239	Tb427-100015600	6.88382e-07	0.00990099	4.29688e-06	0.820458	4.08975	FALSE	3907.58	0.15444	0.855474	2.49762	3.4439e-05
6632	Tb427-100055900	6.65094e-05	0.00990099	4.294e-06	0.149237	3.46922	FALSE	4998.11	0.225431	0.793175	1.70862	3.4439e-05
4797	Tb427-080036300	2.27298e-06	0.00990099	4.30381e-06	0.228837	3.55749	FALSE	2873.27	0.0993516	0.904489	3.69023	3.4466e-05
6777	Tb427-100070700	1.72739e-06	0.00990099	4.31764e-06	0.263163	3.4606	FALSE	5558.5	0.269383	0.753092	1.67443	3.45483e-05
4524	Tb427-080006400	6.07048e-07	0.00990099	4.38038e-06	0.0204457	4.02501	FALSE	4389.68	0.183992	0.830508	2.30856	3.50213e-05
6651	Tb427-100057800	0.00224065	0.00990099	4.50063e-06	0.637908	4.78323	FALSE	5093.93	0.230223	0.792716	1.74228	3.59532e-05
1563	Tb427-020009100	3.00369e-06	0.00990099	4.5504e-06	0.860429	2.36014	FALSE	4222.91	0.17325	0.838754	1.76343	3.63208e-05
5094	Tb427-080066800	7.42668e-05	0.00990099	4.68046e-06	0.00384313	3.55837	FALSE	6982.03	0.400972	0.650023	1.64107	3.73282e-05
1886	Tb427-030013900	9.51238e-07	0.00990099	4.72194e-06	0.819388	3.81997	FALSE	3887.46	0.153471	0.856848	2.34695	3.76281e-05
3966	Tb427-070027800	2.85928e-06	0.00990099	4.82265e-06	0.939016	4.17051	FALSE	4103.43	0.1674	0.839212	1.80624	3.83676e-05
7346	Tb427-100131200	7.47979e-05	0.00990099	4.82034e-06	0.313573	3.41356	FALSE	3729.33	0.144048	0.862803	1.61826	3.83676e-05
9260	Tb427-110168200	5.2015e-05	0.00990099	4.8721e-06	0.125924	3.881	FALSE	2666.27	0.0889092	0.915025	3.1573	3.87292e-05
5542	Tb427-090030400	4.75696e-07	0.00990099	4.90601e-06	0.124614	3.47391	FALSE	4093.29	0.16629	0.843335	1.94267	3.89669e-05
3678	Tb427-060048900	5.19044e-05	0.00990099	5.0568e-06	0.916391	3.94903	FALSE	4571.66	0.196351	0.816079	1.65382	4.01317e-05
46	Tb427-000015600:pseudogene	7.46634e-06	0.00990099	5.19895e-06	0.0794655	4.76331	FALSE	7109.54	0.406	0.66033	1.62488	4.1226e-05
9406	Tb427-110183100	1.3996e-07	0.00990099	5.31243e-06	0.850947	3.85582	FALSE	4452.73	0.188774	0.823866	2.38525	4.20915e-05
5213	Tb427-080078800	8.80236e-05	0.00990099	5.32304e-06	0.875617	3.84553	FALSE	4544.57	0.194307	0.81814	1.57309	4.21411e-05
7595	Tb427-100157000	1.08023e-06	0.00990099	5.43259e-06	0.790168	4.06596	FALSE	3214.75	0.116705	0.886395	2.3193	4.29733e-05
9057	Tb427-110147700	0.000205352	0.00990099	5.53863e-06	0.810439	4.05367	FALSE	7039.93	0.404371	0.651397	1.49556	4.37764e-05
4830	Tb427-080039600	1.60384e-05	0.00990099	5.59844e-06	0.917352	4.92018	FALSE	2874.27	0.0991486	0.904489	2.31248	4.42131e-05
2585	Tb427-040032200	0.000331878	0.00990099	5.63505e-06	0.319459	4.76071	FALSE	2059.82	0.0625251	0.939304	4.20232	4.4466e-05
7851	Tb427-110017900	0	0.00990099	5.72622e-06	0.968492	4.10454	FALSE	3576.98	0.136286	0.870133	2.877	4.51487e-05
8646	Tb427-110099200	5.24652e-06	0.00990099	5.73097e-06	0.61492	3.89634	FALSE	3472.3	0.130599	0.873339	1.79767	4.51494e-05
2198	Tb427-030048400	4.22099e-05	0.00990099	5.84167e-06	0.185794	4.28636	FALSE	5941.04	0.296364	0.740495	2.0397	4.59842e-05
6157	Tb427-100007300	4.40194e-05	0.00990099	5.93366e-06	0.807976	2.89635	FALSE	6670.21	0.365007	0.683005	1.48245	4.66704e-05
3075	Tb427-050031400	3.31475e-05	0.00990099	5.98768e-06	0.714244	4.35741	FALSE	5564.14	0.267022	0.76088	1.58806	4.70572e-05
2382	Tb427-040011900	0.000409021	0.00990099	6.04559e-06	0.916812	4.46796	FALSE	6850.77	0.380423	0.675676	1.83814	4.74738e-05
3204	Tb427-050044300	1.30108e-06	0.00990099	6.234e-06	0.814352	1.00243	FALSE	2330.23	0.0739637	0.929226	2.59073	4.89137e-05
6068	Tb427-090086100	1.63676e-06	0.00990099	6.29672e-06	0.835705	3.6445	FALSE	3746.65	0.14629	0.858223	1.82596	4.93659e-05
9374	Tb427-110179800	1.40357e-06	0.00990099	6.30891e-06	0.682083	3.68402	FALSE	5350.73	0.251471	0.772332	1.51458	4.94215e-05
8427	Tb427-110076200	8.39967e-06	0.00990099	6.36618e-06	0.279125	3.70067	FALSE	1329.76	0.0356342	0.96404	5.63034	4.98299e-05
8867	Tb427-110128000	4.85258e-05	0.00990099	6.58028e-06	0.52583	3.42703	FALSE	6497.45	0.347925	0.696519	1.53003	5.14641e-05
1954	Tb427-030020700	1.11201e-05	0.00990099	6.64344e-06	0.362299	3.42589	FALSE	4970.98	0.222831	0.79661	2.06703	5.19162e-05
5010	Tb427-080058400	0.000245346	0.00990099	6.67497e-06	0.234488	3.98222	FALSE	4508.93	0.190375	0.826157	1.91681	5.21206e-05
5000	Tb427-080057400	0	0.00990099	6.7233e-06	0.865583	3.58332	FALSE	2255.6	0.0716847	0.92831	4.03724	5.24558e-05
3813	Tb427-070011500	6.29452e-07	0.00990099	6.7863e-06	0.605749	3.38679	FALSE	2980.17	0.104639	0.89945	2.73544	5.29048e-05
9034	Tb427-110145400	0.000178867	0.00990099	6.81723e-06	0.139229	3.42996	FALSE	3629.41	0.138144	0.868301	1.53995	5.31032e-05
9259	Tb427-110168100	0	0.00990099	6.93117e-06	0.308947	4.0623	FALSE	4834.59	0.21567	0.798443	1.66443	5.39474e-05
3308	Tb427-060008400	1.16402e-05	0.00990099	6.95306e-06	0.283852	4.19114	FALSE	5390.66	0.247094	0.795007	1.8587	5.40744e-05
6690	Tb427-100061800	0.00829172	0.00990099	6.98745e-06	0.206477	3.9412	FALSE	8926.61	0.655482	0.480302	1.2433	5.42983e-05
9474	Tb427-110189900	0.000939264	0.00990099	7.45108e-06	0.137208	2.47416	FALSE	11621.6	1.36197	0.187586	1.16479	5.78085e-05
6654	Tb427-100058100	5.16907e-07	0.00990099	7.44813e-06	0.507249	1.0003	FALSE	4140.56	0.169555	0.837609	1.89142	5.78085e-05
3550	Tb427-060035700	5.13652e-05	0.00990099	7.61455e-06	0.738025	3.79736	FALSE	2244.32	0.0701367	0.93312	2.96608	5.90295e-05
2871	Tb427-050010000	1.86294e-05	0.00990099	7.69436e-06	0.129594	3.81893	FALSE	2981.33	0.104354	0.89945	2.87631	5.96006e-05
1038	Tb427-000781200:pseudogene	2.08324e-06	0.00990099	7.73002e-06	0.523955	3.99353	FALSE	2653.79	0.0891091	0.912506	3.28918	5.9829e-05
6312	Tb427-100022900	2.46495e-06	0.00990099	7.82069e-06	0.243118	4.02059	FALSE	3627.44	0.138973	0.86601	1.8589	6.04825e-05
3805	Tb427-070010700	2.8634e-06	0.00990099	7.88051e-06	0.495382	3.98728	FALSE	3470.68	0.130438	0.873339	2.41556	6.08965e-05
6359	Tb427-100028000	5.65095e-06	0.00990099	8.15932e-06	0.84845	3.34532	FALSE	6041.82	0.308863	0.723087	1.65544	6.30009e-05
6624	Tb427-100055100:pseudogene	9.81727e-07	0.00990099	8.35428e-06	0.761113	4.0459	FALSE	3357.8	0.124116	0.880669	2.01725	6.44549e-05
1574	Tb427-020010200	5.07608e-05	0.00990099	8.40942e-06	0.312786	3.82116	FALSE	2382.5	0.0760779	0.927623	3.4301	6.48287e-05
5307	Tb427-080088900	6.3947e-06	0.00990099	8.52733e-06	0.914627	3.19417	FALSE	5890.16	0.296505	0.731562	1.77549	6.56855e-05
3640	Tb427-060044700	3.76739e-06	0.00990099	8.76101e-06	0.298059	4.28969	FALSE	2477.57	0.0805373	0.922813	2.82843	6.7432e-05
3210	Tb427-050044900	0	0.00990099	8.78825e-06	0.390972	3.97585	FALSE	5302.75	0.246489	0.781035	1.94867	6.75465e-05
4633	Tb427-080019700	7.96067e-05	0.00990099	8.78982e-06	0.288216	3.98502	FALSE	3804.29	0.148471	0.858681	2.0258	6.75465e-05
5633	Tb427-090039800	0.000111872	0.00990099	8.8137e-06	0.293257	3.5943	FALSE	4231.77	0.17431	0.835547	2.01045	6.76764e-05
6895	Tb427-100083800	0.000133807	0.00990099	8.86518e-06	0.159672	4.50115	FALSE	2292.11	0.0721422	0.931058	3.03057	6.80178e-05
8820	Tb427-110123300	0.000777288	0.00990099	9.02348e-06	0.89465	4.55428	FALSE	8974.3	0.648382	0.499313	1.51487	6.91776e-05
1438	Tb427-010023300	3.36987e-06	0.00990099	9.09748e-06	0.371146	1.63427	FALSE	4688.23	0.204373	0.809208	1.74988	6.96899e-05
3138	Tb427-050037700	6.97942e-05	0.00990099	9.18088e-06	0.155764	4.61938	FALSE	6764.14	0.373062	0.680486	1.68044	7.02732e-05
2663	Tb427-040040600	1.75718e-05	0.00990099	9.20957e-06	0.647981	4.0142	FALSE	6599.58	0.358184	0.689189	1.49601	7.04373e-05
3389	Tb427-060016900	0.000647805	0.00990099	9.38218e-06	0.434149	4.36662	FALSE	4244.28	0.174172	0.837609	1.89828	7.17009e-05
1882	Tb427-030013500	0.00066208	0.00990099	9.43243e-06	0.566814	4.21152	FALSE	6129.09	0.314789	0.720339	1.68304	7.20281e-05
6925	Tb427-100086800	9.33039e-07	0.00990099	9.4419e-06	0.859776	1.31127	FALSE	5431.42	0.2604	0.758818	1.66639	7.20437e-05
1813	Tb427-030006600	3.59925e-07	0.00990099	9.48148e-06	0.385351	4.06941	FALSE	5304.69	0.249958	0.768667	1.98473	7.22749e-05
6106	Tb427-090090000	0.000779824	0.00990099	9.48711e-06	0.607834	2.65281	FALSE	8565.19	0.591481	0.528859	1.2782	7.22749e-05
1326	Tb427-010010600	9.23536e-05	0.00990099	9.58361e-06	0.890362	4.26058	FALSE	8370.23	0.56069	0.551306	1.32363	7.29474e-05
2547	Tb427-040028400	5.69752e-08	0.00990099	9.59042e-06	0.193253	3.18274	FALSE	3845.78	0.15029	0.861429	2.16788	7.29474e-05
2549	Tb427-040028600	1.21253e-06	0.00990099	9.6504e-06	0.353789	3.77449	FALSE	3118.07	0.111685	0.892121	1.86101	7.3346e-05
3152	Tb427-050039100	2.28646e-06	0.00990099	9.67213e-06	0.5594	3.95708	FALSE	4234.89	0.173846	0.839212	2.19527	7.33962e-05
8576	Tb427-110091100	4.95802e-05	0.00990099	9.66493e-06	0.180069	3.87597	FALSE	5485.92	0.262559	0.76088	1.45457	7.33962e-05
3194	Tb427-050043300	5.6109e-06	0.00990099	9.7078e-06	0.333538	3.42572	FALSE	1627.6	0.0461472	0.954421	3.41355	7.36092e-05
3700	Tb427-060051300	1.60143e-05	0.00990099	9.81489e-06	0.622769	3.41643	FALSE	3037.79	0.107234	0.896244	1.71852	7.43631e-05
9202	Tb427-110162400	6.14071e-06	0.00990099	1.00757e-05	0.18775	3.55854	FALSE	3739.52	0.145316	0.860284	2.08533	7.62797e-05
6083	Tb427-090087700	8.9685e-07	0.00990099	1.00942e-05	0.0185628	3.87213	FALSE	2856.49	0.0987301	0.90426	1.95638	7.63598e-05
4972	Tb427-080054300	3.35828e-07	0.00990099	1.01444e-05	0.676465	4.24419	FALSE	1632.93	0.0464362	0.953733	6.1509	7.668e-05
4917	Tb427-080048400	2.97878e-07	0.00990099	1.01713e-05	0.759858	3.49238	FALSE	1866.39	0.0552989	0.945259	4.60985	7.68236e-05
3623	Tb427-060043000	1.55491e-06	0.00990099	1.03808e-05	0.400039	3.67568	FALSE	4849.68	0.214885	0.803252	1.56098	7.83448e-05
5583	Tb427-090034600	1.87842e-05	0.00990099	1.05523e-05	0.396442	4.65635	FALSE	4402.36	0.184818	0.828218	1.92048	7.95773e-05
9480	ND7	0.00972707	0.00990099	1.0659e-05	0.745843	4.56129	FALSE	10321.4	0.917211	0.353642	1.23592	8.03197e-05
5561	Tb427-090032300	2.76226e-05	0.00990099	1.08196e-05	0.188144	3.74659	FALSE	7407.73	0.438936	0.634906	1.45052	8.14661e-05
7119	Tb427-100106800	0.00155543	0.00990099	1.08522e-05	0.317195	3.86849	FALSE	9215.4	0.690015	0.474118	1.35947	8.16484e-05
5669	Tb427-090043700	9.01273e-06	0.00990099	1.09205e-05	0.454197	3.40172	FALSE	5007.72	0.227853	0.786074	1.89526	8.20986e-05
6868	Tb427-100081000	0.000112435	0.00990099	1.10986e-05	0.724469	3.82787	FALSE	6464.36	0.345628	0.698351	1.48329	8.33726e-05
446	Tb427-000497700	6.20093e-07	0.00990099	1.12398e-05	0.0261015	4.04104	FALSE	3771.74	0.146128	0.863491	2.58784	8.43685e-05
7542	Tb427-100151700	2.66307e-06	0.00990099	1.16281e-05	0.495813	2.70544	FALSE	2915.54	0.101829	0.899679	2.11453	8.72156e-05
6823	Tb427-100076500	5.30337e-06	0.00990099	1.16538e-05	0.22488	3.44804	FALSE	2727.12	0.0919451	0.912048	2.78235	8.73408e-05
1334	Tb427-010011400	8.43171e-05	0.00990099	1.17281e-05	0.401481	3.71737	FALSE	2890.47	0.10013	0.901741	2.53413	8.78292e-05
4915	Tb427-080048200	0.000896555	0.00990099	1.17919e-05	0.640851	3.67296	FALSE	9121.02	0.678478	0.474805	1.32038	8.82389e-05
3189	Tb427-050042800	3.13919e-07	0.00990099	1.19373e-05	0.0758326	4.08396	FALSE	2310.6	0.0738152	0.927164	3.36878	8.92579e-05
8960	Tb427-110137700	7.6066e-06	0.00990099	1.19744e-05	0.930846	4.27812	FALSE	1939.76	0.0581401	0.94251	3.64749	8.94667e-05
8466	Tb427-110080100	7.66537e-07	0.00990099	1.20502e-05	0.791147	4.76008	FALSE	2612.61	0.0872729	0.915483	3.37908	8.9964e-05
6459	Tb427-100038500	7.6713e-05	0.00990099	1.22702e-05	0.479081	4.77724	FALSE	5672.27	0.27682	0.75126	2.41798	9.15355e-05
6214	Tb427-100013000	2.84978e-06	0.00990099	1.26169e-05	0.157255	3.77839	FALSE	3851.35	0.151192	0.857765	2.48118	9.40497e-05
1386	Tb427-010016700	2.68986e-05	0.00990099	1.27828e-05	0.754137	3.7793	FALSE	8349.9	0.557886	0.553596	1.59636	9.52129e-05
6711	Tb427-100063900:pseudogene	3.77507e-06	0.00990099	1.28709e-05	0.34481	3.4382	FALSE	1851.07	0.0547312	0.945717	2.33515	9.57959e-05
3314	Tb427-060009000	0.00300524	0.00990099	1.2902e-05	0.823986	3.52764	FALSE	10541.8	1.00904	0.295923	1.22371	9.58805e-05
3916	Tb427-070022200	6.78171e-06	0.00990099	1.28983e-05	0.669147	4.36841	FALSE	5022.38	0.226303	0.794778	1.64704	9.58805e-05
6692	Tb427-100062000	7.82094e-05	0.00990099	1.29172e-05	0.857385	3.19054	FALSE	3313.26	0.121451	0.88273	1.98393	9.59197e-05
4858	Tb427-080042500	3.13043e-05	0.00990099	1.31339e-05	0.981628	4.58888	FALSE	5601.9	0.271541	0.754466	1.55773	9.74545e-05
8477	Tb427-110081200	6.28253e-05	0.00990099	1.31607e-05	0.816818	4.52931	FALSE	4706.4	0.204896	0.810353	2.0743	9.75786e-05
2188	Tb427-030047400	0.000110505	0.00990099	1.32445e-05	0.649531	3.7826	FALSE	1992.28	0.0601348	0.939762	2.13866	9.81249e-05
3057	Tb427-050029600	1.95317e-06	0.00990099	1.33374e-05	0.278304	3.80151	FALSE	2913.69	0.101773	0.899679	2.64191	9.87375e-05
5146	Tb427-080072100	0.000184798	0.00990099	1.34566e-05	0.260343	3.64082	FALSE	6429.83	0.339422	0.706825	1.49401	9.95442e-05
3247	Tb427-050050200:pseudogene	2.08539e-05	0.00990099	1.37777e-05	0.280106	4.39461	FALSE	5637.89	0.273103	0.756757	1.9865	0.000101755
5212	Tb427-080078700	0.000434358	0.00990099	1.37769e-05	0.735533	3.65468	FALSE	1771.05	0.0510237	0.950985	3.12702	0.000101755
7902	Tb427-110023100	2.36669e-05	0.00990099	1.3787e-05	0.909573	2.19255	FALSE	6256.29	0.32932	0.703848	1.47938	0.000101755
6371	Tb427-100029200	0.000155989	0.00990099	1.38464e-05	0.394347	4.2381	FALSE	4941.83	0.221475	0.796152	1.57314	0.000102116
5436	Tb427-090019400	1.27137e-05	0.00990099	1.39004e-05	0.0531432	4.12759	FALSE	4702.75	0.206662	0.803481	1.84867	0.000102436
3523	Tb427-060033000	0.000285908	0.00990099	1.39332e-05	0.192323	3.84854	FALSE	9954.33	0.836546	0.393953	1.28779	0.0001026
4655	Tb427-080021900	0.00018986	0.00990099	1.42748e-05	0.597814	4.37074	FALSE	3237.65	0.117255	0.887082	2.95402	0.000105036
1498	Tb427-010030100	3.54404e-05	0.00990099	1.44045e-05	0.728549	3.93274	FALSE	7807.31	0.486691	0.600779	1.38164	0.00010591
8656	Tb427-110100200	1.98871e-05	0.00990099	1.44496e-05	0.877844	3.87073	FALSE	5193.12	0.239756	0.780119	1.47347	0.00010616
9169	Tb427-110159100	0.00103191	0.00990099	1.45217e-05	0.810746	2.74873	FALSE	10195	0.915255	0.337838	1.27274	0.000106609
6729	Tb427-100065700	1.77897e-05	0.00990099	1.46642e-05	0.544532	3.44171	FALSE	3912.05	0.15451	0.8541	2.18344	0.000107574
3879	Tb427-070018300	1.53069e-06	0.00990099	1.4849e-05	0.754378	2.82962	FALSE	2305.86	0.0733242	0.927852	2.68796	0.000108848
306	Tb427-000286400	3.32602e-06	0.00990099	1.51412e-05	0.917098	3.98347	FALSE	2473.9	0.0807758	0.920751	3.8227	0.000110906
2675	Tb427-040041800	0.0019154	0.00990099	1.52198e-05	0.245477	4.47714	FALSE	7114.64	0.410683	0.647962	1.3913	0.000111397
2493	Tb427-040023000	0.000619913	0.00990099	1.53567e-05	0.503763	4.62729	FALSE	7133.82	0.412525	0.64842	1.73821	0.000112314
4517	Tb427-080005700	1.99964e-05	0.00990099	1.56128e-05	0.57636	2.59736	FALSE	3422.65	0.127087	0.878149	1.95091	0.000114102
7454	Tb427-100142500	4.04929e-05	0.00990099	1.57933e-05	0.889679	4.23178	FALSE	4884.43	0.217196	0.800733	1.95824	0.000115334
1284	Tb427-010006400	1.39916e-05	0.00990099	1.58725e-05	0.451398	4.10811	FALSE	2867.31	0.0987002	0.904947	2.28464	0.000115825
5835	Tb427-090060300	2.89302e-05	0.00990099	1.62097e-05	0.0854368	3.61733	FALSE	2946.32	0.102401	0.901741	2.51096	0.000118108
8708	Tb427-110105600	0.000316352	0.00990099	1.62086e-05	0.804707	2.81992	FALSE	8055.77	0.527986	0.559551	1.35897	0.000118108
4357	Tb427-070068900	3.0718e-06	0.00990099	1.63445e-05	0.599159	4.18154	FALSE	3329.64	0.122161	0.883417	2.31691	0.000119001
1635	Tb427-020016800	0.00153079	0.00990099	1.64304e-05	0.630092	4.63965	FALSE	7252.42	0.426405	0.635593	1.6736	0.000119536
2503	Tb427-040024000	3.50377e-06	0.00990099	1.64898e-05	0.825943	3.46985	FALSE	2527.15	0.0833261	0.918003	2.67768	0.000119878
8049	Tb427-110038000	3.2096e-05	0.00990099	1.70894e-05	0.930297	4.74815	FALSE	3309.16	0.121004	0.884792	2.03787	0.000124145
1619	Tb427-020015200	0.000137872	0.00990099	1.71916e-05	0.0230929	3.55933	FALSE	1711.23	0.0490001	0.951214	3.28526	0.000124793
3386	Tb427-060016600	9.4194e-06	0.00990099	1.75065e-05	0.474512	3.75793	FALSE	2843.4	0.097883	0.904947	3.78544	0.000126984
4942	Tb427-080050900	0.000243895	0.00990099	1.77712e-05	0.10932	4.08946	FALSE	3752.44	0.145004	0.862574	1.90161	0.000128808
2030	Tb427-030029600	3.38188e-06	0.00990099	1.84537e-05	0.166506	4.0642	FALSE	5852.56	0.289122	0.747366	1.48965	0.000133655
7645	Tb427-100162700	2.73959e-06	0.00990099	1.87537e-05	0.764079	3.17573	FALSE	6417.2	0.339227	0.706596	1.63224	0.000135625
7826	Tb427-110015400	9.61324e-07	0.00990099	1.87516e-05	0.872141	1.00039	FALSE	6679.33	0.366304	0.681631	1.50319	0.000135625
6706	Tb427-100063400	1.57623e-06	0.00990099	1.8845e-05	0.321044	2.4722	FALSE	2438.88	0.0791342	0.923042	2.7387	0.000136184
8268	Tb427-110060300	9.06609e-06	0.00990099	1.88982e-05	0.549635	3.8541	FALSE	8614.91	0.587985	0.543518	1.68806	0.000136466
7673	Tb427-100165500	0.000131397	0.00990099	1.96416e-05	0.764032	3.93608	FALSE	3207.45	0.115652	0.888456	2.69393	0.000141729
1528	Tb427-020005300	3.2725e-05	0.00990099	1.97527e-05	0.900454	3.70355	FALSE	3063.21	0.108018	0.897847	2.58635	0.000142425
7124	Tb427-100107300	5.9791e-05	0.00990099	1.97907e-05	0.732111	3.68779	FALSE	7321.22	0.430906	0.637884	1.73062	0.000142593
5540	Tb427-090030200	0.000202117	0.00990099	1.98461e-05	0.700933	3.87421	FALSE	5694.11	0.27918	0.74645	1.45733	0.000142886
2953	Tb427-050018300	4.73591e-05	0.00990099	2.0496e-05	0.066741	4.21672	FALSE	2796	0.0951822	0.908383	1.99184	0.000147456
5397	Tb427-090015000	7.90202e-05	0.00990099	2.0524e-05	0.933773	3.02896	FALSE	5338.66	0.249373	0.774851	1.62266	0.000147547
9200	Tb427-110162200	0.00056092	0.00990099	2.07605e-05	0.237641	4.41198	FALSE	6491.12	0.347378	0.698122	1.74066	0.000149137
9124	Tb427-110154600	6.60393e-05	0.00990099	2.0823e-05	0.836755	3.01131	FALSE	3720.62	0.144176	0.860742	1.80995	0.000149365
4475	Tb427-070081600:pseudogene	3.00669e-06	0.00990099	2.08096e-05	0.662125	3.75902	FALSE	1899.21	0.0565834	0.944114	3.29805	0.000149365
3833	Tb427-070013600	0.000177981	0.00990099	2.08454e-05	0.481535	4.29796	FALSE	1623.72	0.0457968	0.954421	3.32885	0.000149415
2349	Tb427-040008600	0.000542132	0.00990099	2.10677e-05	0.922915	4.36865	FALSE	3790.95	0.146921	0.862116	2.04157	0.000150897
2081	Tb427-030034700	0.00375024	0.00990099	2.11716e-05	0.658902	4.71602	FALSE	8075.93	0.533238	0.553367	1.37806	0.000151529
8913	Tb427-110132900	0.000135192	0.00990099	2.1355e-05	0.654898	4.01619	FALSE	2149.06	0.066362	0.934265	3.20242	0.000152729
6634	Tb427-100056100	9.67537e-07	0.00990099	2.15688e-05	0.868275	3.98829	FALSE	3801.16	0.148161	0.860742	2.27819	0.000154145
6143	Tb427-100005900	7.58223e-05	0.00990099	2.16266e-05	0.846107	4.3705	FALSE	1779.42	0.0514632	0.950298	2.96954	0.000154444
6391	Tb427-100031200	0.000109976	0.00990099	2.20531e-05	0.224772	4.16882	FALSE	2223.03	0.0692873	0.932891	3.47777	0.000157374
2473	Tb427-040021000	2.45238e-06	0.00990099	2.20787e-05	0.163114	3.96021	FALSE	6201.29	0.321882	0.715987	2.10042	0.00015744
9032	Tb427-110145200	0.000282801	0.00990099	2.2397e-05	0.659532	3.57709	FALSE	5488.68	0.262242	0.762025	1.44594	0.000159593
7182	Tb427-100114300	8.34462e-05	0.00990099	2.3175e-05	0.918374	4.61019	FALSE	3746.62	0.145615	0.859826	1.83553	0.000165016
5370	Tb427-090012000	0.000352274	0.00990099	2.35112e-05	0.880945	4.64457	FALSE	2669.14	0.0889309	0.914338	2.02582	0.000167286
2167	Tb427-030045000	2.22628e-05	0.00990099	2.35565e-05	0.176946	2.80496	FALSE	6407.8	0.34097	0.699954	1.48589	0.000167486
3166	Tb427-050040500	5.3044e-05	0.00990099	2.37102e-05	0.729573	3.64296	FALSE	6168.56	0.320866	0.711177	1.60255	0.000168455
8907	Tb427-110132300	1.90687e-05	0.00990099	2.37623e-05	0.907753	4.47074	FALSE	2445.74	0.079165	0.923042	4.03493	0.000168702
8311	Tb427-110064600	0.0124291	0.00990099	2.39781e-05	0.468395	3.5244	FALSE	10612.6	1.01492	0.300504	1.2508	0.000170109
1372	Tb427-010015200	0.000667911	0.00990099	2.43807e-05	0.483988	3.84872	FALSE	4245.05	0.174126	0.837838	2.4529	0.000172839
7171	Tb427-100113200	5.74589e-05	0.00990099	2.45678e-05	0.954488	3.0793	FALSE	3560.04	0.134613	0.871278	2.05559	0.000174038
7371	Tb427-100133800	1.34319e-06	0.00990099	2.47323e-05	0.61565	3.73027	FALSE	2988.74	0.104859	0.899679	2.59222	0.000175076
6191	Tb427-100010700	1.05705e-05	0.00990099	2.4767e-05	0.532598	4.57772	FALSE	4533.93	0.193956	0.818827	1.94256	0.000175193
8131	Tb427-110046400:pseudogene	4.75003e-05	0.00990099	2.48056e-05	0.82166	3.22711	FALSE	1093.02	0.0276305	0.97366	5.55389	0.000175339
1779	Tb427-020031300	8.99982e-07	0.00990099	2.52362e-05	0.973275	2.2397	FALSE	3282.12	0.120272	0.883417	2.27439	0.000178252
4082	Tb427-070041200	8.05406e-05	0.00990099	2.57148e-05	0.0962288	4.37202	FALSE	3932.25	0.155022	0.855932	1.71456	0.000181501
2012	Tb427-030027800	0.000347696	0.00990099	2.58022e-05	0.241247	3.94637	FALSE	2780.82	0.0946238	0.907009	2.39555	0.000181985
5754	Tb427-090052200	3.26992e-06	0.00990099	2.64844e-05	0.46004	4.53646	FALSE	2876.25	0.0995861	0.902886	3.47827	0.000186661
3803	Tb427-070010500	7.27168e-05	0.00990099	2.6743e-05	0.0628305	3.79088	FALSE	8470.89	0.583524	0.529088	1.41316	0.000188347
6436	Tb427-100036200	2.30576e-06	0.00990099	2.69063e-05	0.222274	3.89975	FALSE	1882.06	0.0558562	0.945488	5.62536	0.000189359
5616	Tb427-090038100	2.98542e-05	0.00990099	2.70202e-05	0.802612	4.12812	FALSE	5109.4	0.233588	0.785616	2.05937	0.000190023
7094	Tb427-100104300	6.19981e-06	0.00990099	2.71003e-05	0.675003	2.75038	FALSE	6216.4	0.324006	0.712093	1.53473	0.000190448
7351	Tb427-100131700	0.00352425	0.00990099	2.71891e-05	0.446863	4.08569	FALSE	3474.54	0.130052	0.872881	2.06219	0.000190934
1827	Tb427-030008000	0.000126761	0.00990099	2.7285e-05	0.808309	3.87049	FALSE	2587.42	0.0854069	0.917087	2.66308	0.000191469
6733	Tb427-100066100	0.00020881	0.00990099	2.79867e-05	0.246198	3.73876	FALSE	3377.39	0.124048	0.88273	2.22185	0.000196251
3069	Tb427-050030800	1.19249e-05	0.00990099	2.80467e-05	0.524623	4.58254	FALSE	4081.17	0.165237	0.843564	1.92681	0.00019653
2033	Tb427-030029900	0.00012323	0.00990099	2.85257e-05	0.423999	4.68979	FALSE	6177.45	0.313873	0.732707	1.99975	0.000199654
3145	Tb427-050038400	1.83008e-05	0.00990099	2.85466e-05	0.590059	2.6242	FALSE	2628.53	0.087612	0.914338	2.13156	0.000199654
8337	Tb427-110067200	0.00399323	0.00990099	2.85544e-05	0.318225	3.11899	FALSE	11005.7	1.11812	0.266377	1.2365	0.000199654
5792	Tb427-090056000	0.000141499	0.00990099	2.85934e-05	0.827163	3.58217	FALSE	2222.26	0.0696537	0.930142	2.69791	0.000199783
7849	Tb427-110017700	0.000138494	0.00990099	2.88291e-05	0.263335	4.61781	FALSE	2395.26	0.0767435	0.92579	2.37254	0.000201285
5126	Tb427-080070000	0.000321048	0.00990099	2.88778e-05	0.929306	4.49423	FALSE	7350.71	0.438363	0.626202	1.48052	0.00020148
4578	Tb427-080011800	2.84687e-05	0.00990099	2.89293e-05	0.961433	3.49906	FALSE	4875.6	0.218197	0.794778	1.63434	0.000201694
8064	Tb427-110039500	1.80218e-05	0.00990099	2.90228e-05	0.277071	1.00016	FALSE	6092.93	0.311669	0.724004	1.47461	0.0002022
2343	Tb427-040008000	1.95703e-05	0.00990099	2.92529e-05	0.380117	4.50907	FALSE	3869.13	0.152095	0.857077	1.99547	0.000203657
6164	Tb427-100008000	8.2637e-07	0.00990099	2.93051e-05	0.421528	1.00023	FALSE	2201.24	0.0688507	0.932203	2.766	0.0002038
8290	Tb427-110062500	3.14255e-05	0.00990099	2.93155e-05	0.00957428	4.50302	FALSE	3379.98	0.124348	0.882959	2.17068	0.0002038
6597	Tb427-100052400	1.62282e-05	0.00990099	2.96013e-05	0.544728	4.05168	FALSE	3447.89	0.127898	0.88044	2.94264	0.00020564
4432	Tb427-070077300	5.99994e-05	0.00990099	2.97101e-05	0.923103	2.76252	FALSE	5452.36	0.260062	0.761567	1.51416	0.000206248
6802	Tb427-100073200	8.85451e-06	0.00990099	3.04414e-05	0.258844	3.41188	FALSE	2610.39	0.0866176	0.916858	2.54217	0.000211173
7227	Tb427-100118800	0.000120057	0.00990099	3.09207e-05	0.62525	3.65399	FALSE	3190.08	0.114584	0.890747	2.26103	0.000214345
5688	Tb427-090045600	0.00033351	0.00990099	3.09545e-05	0.263495	4.76912	FALSE	4006.22	0.158983	0.853642	1.95182	0.000214426
5904	Tb427-090068000	9.97542e-06	0.00990099	3.11176e-05	0.0239583	3.42951	FALSE	1725.54	0.0498688	0.950298	3.53465	0.000215402
1279	Tb427-010005900	2.07786e-06	0.00990099	3.11478e-05	0.79135	4.07205	FALSE	1935.93	0.0578611	0.943656	3.76108	0.000215458
6485	Tb427-100041100	4.23793e-05	0.00990099	3.14056e-05	0.181635	1.19915	FALSE	5182.28	0.238228	0.782639	1.56154	0.000217086
2472	Tb427-040020900	0.0203179	0.00990099	3.19317e-05	0.445375	2.74434	FALSE	11476.4	1.33422	0.179569	1.18289	0.000220408
4430	Tb427-070077100	1.89893e-05	0.00990099	3.19117e-05	0.504721	4.26229	FALSE	3568.21	0.134974	0.871507	1.83566	0.000220408
2456	Tb427-040019300	0.000147289	0.00990099	3.19861e-05	0.548617	4.52809	FALSE	4189.1	0.17116	0.839212	2.17124	0.000220627
8100	Tb427-110043300	2.21091e-05	0.00990099	3.21195e-05	0.507429	3.74741	FALSE	6379.89	0.334802	0.712093	1.60066	0.000221389
5519	Tb427-090028100	0.000157583	0.00990099	3.21757e-05	0.918127	3.92644	FALSE	2609.78	0.0867839	0.914338	3.04108	0.000221619
3710	Tb427-060052300	7.20785e-05	0.00990099	3.25132e-05	0.984674	2.97951	FALSE	4265.89	0.17662	0.831654	1.78825	0.000223785
3868	Tb427-070017200	0.016063	0.00990099	3.29337e-05	0.655805	3.51583	FALSE	10679	1.03417	0.292945	1.13998	0.000226519
8177	Tb427-110051100	3.74819e-06	0.00990099	3.30639e-05	0.963138	1.00061	FALSE	9566.59	0.7643	0.425561	1.30414	0.000227253
4053	Tb427-070038300	0.000209565	0.00990099	3.34979e-05	0.845616	4.87574	FALSE	3817.94	0.148194	0.862803	3.25659	0.000230073
8783	Tb427-110119600	0.00013209	0.00990099	3.39826e-05	0.663309	3.38984	FALSE	4521.73	0.192903	0.818598	1.61156	0.000233236
6927	Tb427-100087000	4.22364e-05	0.00990099	3.40661e-05	0.0932369	3.5647	FALSE	5931.67	0.298049	0.734082	1.60126	0.000233644
6972	Tb427-100092100	2.21023e-05	0.00990099	3.47273e-05	0.167437	3.80821	FALSE	4157.72	0.170326	0.837151	1.82	0.000238011
3551	Tb427-060035800	1.61039e-06	0.00990099	3.50713e-05	0.627449	2.03365	FALSE	3829.62	0.149936	0.85891	1.88951	0.000240199
2897	Tb427-050012700	1.12034e-05	0.00990099	3.60275e-05	0.958712	3.42379	FALSE	4124.59	0.168331	0.839212	2.05713	0.000246574
4818	Tb427-080038400	2.85311e-05	0.00990099	3.66687e-05	0.881035	4.2627	FALSE	2905.64	0.10034	0.904718	3.03068	0.000250785
8397	Tb427-110073200	0.000201021	0.00990099	3.70033e-05	0.913498	3.32538	FALSE	4626.37	0.199481	0.813788	1.79821	0.000252895
7127	Tb427-100107600	1.57652e-06	0.00990099	3.71744e-05	0.33525	3.74008	FALSE	2766.21	0.0943768	0.907696	3.57728	0.000253886
2689	Tb427-040043200	7.21866e-05	0.00990099	3.72613e-05	0.928118	3.55921	FALSE	7002.86	0.397542	0.661246	1.70949	0.0002543
3101	Tb427-050034000	3.2445e-06	0.00990099	3.74575e-05	0.105723	3.26679	FALSE	2449.77	0.0791261	0.925103	3.08189	0.000255279
7918	Tb427-110024700	0.000242147	0.00990099	3.74494e-05	0.0810769	3.8814	FALSE	2012.31	0.0608076	0.938846	2.27493	0.000255279
1951	Tb427-030020400	0.000215048	0.00990099	3.86484e-05	0.12498	2.81961	FALSE	3279.19	0.118435	0.889372	1.94197	0.000263211
2391	Tb427-040012800	7.12837e-05	0.00990099	3.8849e-05	0.327915	2.67782	FALSE	2555.25	0.0841767	0.917316	2.11123	0.000264021
7442	Tb427-100140900	0.000718619	0.00990099	3.88466e-05	0.995547	3.7046	FALSE	4084.62	0.164035	0.847229	1.83517	0.000264021
7812	Tb427-110014000	6.2034e-05	0.00990099	3.8832e-05	0.999695	2.39459	FALSE	2070.62	0.0630916	0.937929	2.34526	0.000264021
3914	Tb427-070022000	1.03233e-05	0.00990099	3.9289e-05	0.221481	1.00007	FALSE	2863.76	0.0983618	0.905176	2.04392	0.000266824
8200	Tb427-110053500	4.49719e-05	0.00990099	3.96874e-05	0.218786	4.43884	FALSE	2962.2	0.103109	0.901512	2.97264	0.000269341
4788	Tb427-080035400	0.000398616	0.00990099	3.97543e-05	0.725909	3.71064	FALSE	4683.1	0.201587	0.816766	1.78014	0.000269606
2560	Tb427-040029700	6.06821e-05	0.00990099	4.06077e-05	0.580314	3.6897	FALSE	2836.86	0.0970862	0.906093	2.47943	0.000275202
2418	Tb427-040015500	1.84908e-05	0.00990099	4.07975e-05	0.199601	4.39509	FALSE	3278.76	0.119699	0.88525	3.25681	0.000276295
5043	Tb427-080061700	0.000481225	0.00990099	4.19784e-05	0.976356	4.24693	FALSE	3195.9	0.11499	0.888914	2.96274	0.000284094
9342	Tb427-110176400	0.000262207	0.00990099	4.2255e-05	0.821477	3.26976	FALSE	2347.74	0.0748906	0.92579	2.50932	0.000285767
7296	Tb427-100126200	3.08096e-05	0.00990099	4.26353e-05	0.559982	2.86231	FALSE	4069.2	0.164122	0.845167	1.5904	0.000288137
6852	Tb427-100079400	1.49572e-05	0.00990099	4.30015e-05	0.808213	2.30854	FALSE	5227.04	0.243072	0.776683	1.54543	0.00029041
3029	Tb427-050026400:pseudogene	0.000343217	0.00990099	4.38388e-05	0.165504	3.80531	FALSE	7211.87	0.424033	0.633761	1.68375	0.000295858
44	Tb427-000015400	7.63786e-06	0.00990099	4.39645e-05	0.356935	3.83959	FALSE	4976.73	0.221156	0.804398	2.22684	0.000296501
3571	Tb427-060037800	5.09808e-05	0.00990099	4.49375e-05	0.492196	2.53483	FALSE	2724.58	0.0920036	0.910215	1.94538	0.000302852
2227	Tb427-030051700	0.000403797	0.00990099	4.54851e-05	0.707946	3.69922	FALSE	4069.87	0.16271	0.849977	2.42948	0.000306329
3025	Tb427-050026000	0.000111946	0.00990099	4.78708e-05	0.190418	2.44238	FALSE	2823.8	0.0960092	0.909528	2.30212	0.000322052
6190	Tb427-100010600	0.000234601	0.00990099	4.7886e-05	0.890143	3.4507	FALSE	5112.56	0.232943	0.78699	1.57976	0.000322052
5658	Tb427-090042600	0.00261249	0.00990099	4.82672e-05	0.759178	2.58104	FALSE	9856.53	0.813055	0.407009	1.26275	0.00032439
5852	Tb427-090062400	0.000310722	0.00990099	4.93618e-05	0.143821	4.38066	FALSE	5588.13	0.268054	0.761567	1.91913	0.000331517
2461	Tb427-040019800	9.09213e-06	0.00990099	5.00303e-05	0.096089	2.94825	FALSE	2498.13	0.0815755	0.919835	2.68588	0.000335774
7501	Tb427-100147400	3.94385e-05	0.00990099	5.0529e-05	0.140762	4.41405	FALSE	3420.79	0.127415	0.876775	1.81248	0.000338887
5740	Tb427-090050800	3.6073e-05	0.00990099	5.18407e-05	0.929687	3.8977	FALSE	3079.04	0.108497	0.898534	2.44126	0.000347444
7710	Tb427-100170400	2.54109e-05	0.00990099	5.19838e-05	0.212005	4.62749	FALSE	4351.51	0.181262	0.831654	2.61119	0.000348162
2040	Tb427-030030600	0.00145906	0.00990099	5.32886e-05	0.448667	3.32273	FALSE	5393.3	0.25503	0.765231	1.42837	0.000356655
7011	Tb427-100096000	2.72495e-06	0.00990099	5.33362e-05	0.514511	1.00014	FALSE	4560.21	0.196276	0.813788	1.70215	0.000356727
2635	Tb427-040037600	2.29854e-05	0.00990099	5.3502e-05	0.119345	3.70196	FALSE	5293.23	0.247122	0.775767	1.97101	0.00035759
8790	Tb427-110120300	2.42129e-05	0.00990099	5.38479e-05	0.0194992	2.83773	FALSE	2104.24	0.0643274	0.938158	2.70814	0.000359654
3385	Tb427-060016500	3.74265e-06	0.00990099	5.44703e-05	0.447933	3.72104	FALSE	3236.45	0.116895	0.89006	2.56571	0.00036356
6226	Tb427-100014300	4.85425e-05	0.00990099	5.46281e-05	0.502988	4.05477	FALSE	3531.94	0.133395	0.871278	2.41363	0.000364363
3780	Tb427-070008200	4.47011e-05	0.00990099	5.50249e-05	0.556972	4.39809	FALSE	2757.71	0.0933275	0.910215	2.33967	0.000366757
7624	Tb427-100160600	4.94107e-05	0.00990099	5.53679e-05	0.318884	3.6301	FALSE	3655.72	0.139659	0.867842	2.24059	0.000368789
4166	Tb427-070049600	0.00378988	0.00990099	5.56796e-05	0.298006	3.66907	FALSE	6643.86	0.362556	0.684837	1.41217	0.000370611
2212	Tb427-030049800	1.65609e-05	0.00990099	5.57987e-05	0.746924	2.28803	FALSE	4966.29	0.222641	0.795694	1.62372	0.000371149
1817	Tb427-030007000	8.76605e-07	0.00990099	5.58523e-05	0.0953437	3.89731	FALSE	4063.68	0.163248	0.849061	1.78033	0.000371251
5600	Tb427-090036300	0.000116427	0.00990099	5.6019e-05	0.935061	4.11329	FALSE	4508.51	0.191321	0.821805	1.77372	0.000372104
8154	Tb427-110048700	0.000551465	0.00990099	5.64025e-05	0.330599	3.38055	FALSE	3581.16	0.135324	0.871507	1.54145	0.000374395
7635	Tb427-100161700	0.000513628	0.00990099	5.661e-05	0.767318	3.20622	FALSE	6408.59	0.337898	0.706825	1.52024	0.000375516
5739	Tb427-090050700	8.53784e-05	0.00990099	5.7113e-05	0.517834	3.93896	FALSE	4754.44	0.20794	0.807375	1.93088	0.000378593
7061	Tb427-100101000	1.39637e-06	0.00990099	5.72377e-05	0.908492	1.00012	FALSE	4066.79	0.163517	0.84677	1.84292	0.000379161
5175	Tb427-080075000	1.64099e-05	0.00990099	5.7716e-05	0.724704	3.29445	FALSE	3109.31	0.111197	0.891205	1.75744	0.000382068
8556	Tb427-110089100	3.54336e-06	0.00990099	5.79156e-05	0.810419	3.24949	FALSE	5830.11	0.291604	0.735685	1.55569	0.000383128
7547	Tb427-100152200	0.000171548	0.00990099	5.88184e-05	0.431723	4.04263	FALSE	3734.85	0.144186	0.863262	2.10996	0.000388835
2369	Tb427-040010600	2.37888e-05	0.00990099	5.97114e-05	0.40232	2.77024	FALSE	4633.16	0.200919	0.811498	1.6749	0.000394469
2057	Tb427-030032300	3.23391e-05	0.00990099	6.02188e-05	0.0321686	3.28269	FALSE	4422.58	0.186404	0.825928	1.96634	0.000397551
8860	Tb427-110127300	1.62266e-06	0.00990099	6.06439e-05	0.4861	4.03462	FALSE	2322.53	0.0739668	0.928081	2.69862	0.000400085
6008	Tb427-090080100	0.00211612	0.00990099	6.13633e-05	0.246051	4.3917	FALSE	8138.56	0.532077	0.564361	1.66809	0.000404556
1738	Tb427-020027200	2.85767e-05	0.00990099	6.19771e-05	0.47407	1.96039	FALSE	2146.37	0.0663341	0.934265	2.41232	0.000408325
5333	Tb427-090007300	0.000175944	0.00990099	6.28624e-05	0.521877	4.48825	FALSE	6789.43	0.375558	0.677966	1.98806	0.000413876
4596	Tb427-080013600	0.000148773	0.00990099	6.39698e-05	0.742997	3.84687	FALSE	1841.47	0.0540358	0.945946	2.35005	0.000420881
9004	Tb427-110142100	3.13844e-05	0.00990099	6.40477e-05	0.739014	3.37365	FALSE	4799.25	0.212328	0.800962	1.59537	0.000421108
8515	Tb427-110085000	2.03583e-05	0.00990099	6.42986e-05	0.825643	4.42279	FALSE	2643.06	0.0880632	0.915254	2.17759	0.000422472
3984	Tb427-070029600	0.000332282	0.00990099	6.44962e-05	0.267085	3.0263	FALSE	6164.6	0.319735	0.712781	1.60222	0.000423483
2850	Tb427-050007800	0.00077278	0.00990099	6.47905e-05	0.498054	3.50658	FALSE	2086.94	0.063677	0.937471	2.36329	0.000425127
8717	Tb427-110106500	8.97561e-07	0.00990099	6.51235e-05	0.0111932	1.00094	FALSE	2436.26	0.0787545	0.923042	2.43783	0.000427024
5518	Tb427-090028000	0.000132185	0.00990099	6.66386e-05	0.65575	3.95477	FALSE	820.219	0.0193747	0.981448	4.80424	0.000436663
6390	Tb427-100031100	0.000122624	0.00990099	6.6734e-05	0.456994	4.29544	FALSE	3930.01	0.156128	0.850206	2.10865	0.000436993
1804	Tb427-030005700	0.00240423	0.00990099	6.86517e-05	0.686752	3.42695	FALSE	5215.36	0.241176	0.778974	1.65541	0.000449247
1487	Tb427-010029000	2.42551e-05	0.00990099	6.92612e-05	0.307072	4.347	FALSE	4578.92	0.196262	0.81814	1.66109	0.000452428
2018	Tb427-030028400	3.51794e-05	0.00990099	6.92778e-05	0.76668	3.5567	FALSE	3033.51	0.106824	0.896473	2.67634	0.000452428
9437	Tb427-110186200	1.91611e-05	0.00990099	6.92103e-05	0.389783	4.82911	FALSE	2805.34	0.0958469	0.907696	2.52439	0.000452428
6247	Tb427-100016400	4.81633e-05	0.00990099	6.97724e-05	0.202498	4.2624	FALSE	2430.45	0.0783351	0.923958	3.3387	0.000455352
9037	Tb427-110145700	0.000452241	0.00990099	7.10808e-05	0.944726	4.53509	FALSE	4556.41	0.192707	0.826157	2.01142	0.000463579
1388	Tb427-010016900	3.80545e-05	0.00990099	7.14357e-05	0.480509	2.71245	FALSE	3943.33	0.156689	0.850664	1.82118	0.00046558
685	Tb427-000669200:pseudogene	9.66255e-06	0.00990099	7.17749e-05	0.50646	2.98534	FALSE	1970.53	0.0592243	0.941594	2.79855	0.000467477
4682	Tb427-080024700	5.61451e-05	0.00990099	7.19027e-05	0.994214	3.45989	FALSE	3602.91	0.137059	0.86853	1.89126	0.000467995
4107	Tb427-070043700	0.000150088	0.00990099	7.20067e-05	0.25805	3.66195	FALSE	3131.06	0.111925	0.891434	2.62734	0.000468075
6750	Tb427-100068000	8.18067e-05	0.00990099	7.20115e-05	0.587291	3.53261	FALSE	4763.09	0.209057	0.806001	1.80079	0.000468075
5730	Tb427-090049800	0.00654001	0.00990099	7.28507e-05	0.464938	4.01765	FALSE	7488.73	0.451084	0.620705	1.31754	0.000473212
8878	Tb427-110129200	0.000345171	0.00990099	7.31721e-05	0.0134334	3.59317	FALSE	6059.67	0.31004	0.721484	1.62237	0.000474982
7845	Tb427-110017300	0.00030407	0.00990099	7.32946e-05	0.605968	3.72914	FALSE	8364.88	0.558405	0.554283	1.47032	0.000475459
7082	Tb427-100103100	3.62235e-07	0.00990099	7.34159e-05	0.526307	3.18332	FALSE	4516.74	0.192666	0.821347	1.77503	0.000475928
8776	Tb427-110118900	3.25209e-07	0.00990099	7.36265e-05	0.769987	1.00032	FALSE	2865.34	0.0992552	0.90197	2.28656	0.000476974
7766	Tb427-110009300	0.00198402	0.00990099	7.44871e-05	0.470019	4.1737	FALSE	9940.72	0.822174	0.407009	1.47754	0.000482227
9030	Tb427-110145000	0.000176303	0.00990099	7.47626e-05	0.256927	3.86381	FALSE	2847.14	0.0975157	0.905864	2.58996	0.000483688
3860	Tb427-070016300	5.59965e-05	0.00990099	7.55181e-05	0.18268	2.09219	FALSE	5230.17	0.244624	0.769583	1.51805	0.000488249
2397	Tb427-040013400	0.000284774	0.00990099	7.59211e-05	0.81769	2.88248	FALSE	3796.57	0.148267	0.857077	1.68365	0.000490528
4705	Tb427-080027000	6.04877e-05	0.00990099	7.64881e-05	0.0395929	1.00043	FALSE	3918.25	0.155132	0.85158	1.66967	0.000493863
3020	Tb427-050025500	1.4285e-05	0.00990099	7.67869e-05	0.896323	3.79126	FALSE	3122.48	0.111838	0.891205	2.44834	0.000495462
6732	Tb427-100066000	9.83574e-06	0.00990099	7.74396e-05	0.473991	3.41071	FALSE	3799.62	0.14767	0.861658	2.42715	0.000499341
250	Tb427-000272800:pseudogene	0.00113805	0.00990099	7.80466e-05	0.118575	4.03141	FALSE	1729.8	0.049678	0.949611	2.67059	0.000502921
7694	Tb427-100168800	5.04453e-06	0.00990099	7.82353e-05	0.909267	3.89412	FALSE	4233.5	0.173413	0.840586	2.12358	0.000503802
1538	Tb427-020006500	0.000534766	0.00990099	7.83696e-05	0.174746	3.09423	FALSE	3724.44	0.143685	0.862345	1.60438	0.000504332
8034	Tb427-110036400	0.00258359	0.00990099	7.90811e-05	0.997071	3.35135	FALSE	6265.34	0.330289	0.701099	1.53235	0.000508236
9196	Tb427-110161800	2.05521e-05	0.00990099	7.90699e-05	0.855379	4.3671	FALSE	3399.11	0.126082	0.879294	2.44411	0.000508236
5161	Tb427-080073600	0.000136349	0.00990099	7.97113e-05	0.333179	2.96477	FALSE	7012.64	0.40188	0.652084	1.52191	0.000511608
7191	Tb427-100115200	0.000440294	0.00990099	7.96763e-05	0.424548	1.42787	FALSE	4574.1	0.196159	0.816079	1.53744	0.000511608
7462	Tb427-100143300	9.60166e-05	0.00990099	8.02907e-05	0.687913	3.10292	FALSE	4005.69	0.160585	0.84677	1.48198	0.000514986
4169	Tb427-070049900	0.00267608	0.00990099	8.08617e-05	0.987459	3.33385	FALSE	8018.41	0.513093	0.582913	1.35326	0.000518306
9488	COI	0.00038625	0.00990099	8.12464e-05	0.982716	3.41651	FALSE	7846.04	0.485664	0.60765	1.37948	0.000520428
2888	Tb427-050011800	0.000196885	0.00990099	8.31071e-05	0.487812	4.07741	FALSE	5695.78	0.278588	0.749198	1.72561	0.000531995
5722	Tb427-090049000	0.000492175	0.00990099	8.32288e-05	0.79682	2.55144	FALSE	7533.54	0.461705	0.605589	1.36312	0.000532423
1986	Tb427-030023900	0.0014295	0.00990099	8.35778e-05	0.770486	3.77082	FALSE	5725.25	0.278025	0.755153	1.48616	0.000534303
4200	Tb427-070053000	0.0011692	0.00990099	8.42917e-05	0.897852	3.9536	FALSE	4102.76	0.165916	0.842419	1.8169	0.000538512
4124	Tb427-070045400	0.000127818	0.00990099	8.45921e-05	0.724687	4.01325	FALSE	3445.45	0.128425	0.876317	1.83195	0.000540075
7721	Tb427-100171500	0.000482632	0.00990099	8.47694e-05	0.476385	3.5177	FALSE	4672.27	0.202419	0.812643	2.20475	0.000540851
3951	Tb427-070026300	3.9376e-05	0.00990099	8.51451e-05	0.497703	4.02069	FALSE	5863.87	0.293843	0.734082	1.97851	0.000542891
5458	Tb427-090021600	1.31333e-06	0.00990099	8.60689e-05	0.0110297	1.00068	FALSE	1796.03	0.0524077	0.948007	3.11539	0.000548421
8113	Tb427-110044600	4.00106e-05	0.00990099	8.79533e-05	0.25061	1.71208	FALSE	4182.78	0.170179	0.841732	1.73804	0.00056006
1795	Tb427-020032900	2.86965e-05	0.00990099	8.84062e-05	0.787162	4.48047	FALSE	1429.03	0.0388169	0.962208	12.367	0.000562574
8801	Tb427-110121400	0.000132105	0.00990099	8.85039e-05	0.498285	4.18988	FALSE	2705.77	0.0907251	0.912964	2.07207	0.000562674
9455	Tb427-110188000	6.27931e-05	0.00990099	8.85379e-05	0.931698	1.48491	FALSE	6553.49	0.351848	0.69629	1.45379	0.000562674
3180	Tb427-050041900	5.8954e-05	0.00990099	9.01024e-05	0.244061	3.35265	FALSE	3681.62	0.141512	0.864636	2.04211	0.000572241
1913	Tb427-030016600	0.000595326	0.00990099	9.06471e-05	0.922828	4.45505	FALSE	4673.98	0.201674	0.814475	2.04334	0.000575325
34	Tb427-000014300:pseudogene	0.00025458	0.00990099	9.08676e-05	0.755857	4.21417	FALSE	3188.4	0.114705	0.889601	2.12203	0.000576347
7744	Tb427-110007100	6.8761e-05	0.00990099	9.19369e-05	0.536563	3.93893	FALSE	3032.18	0.106635	0.897618	1.98594	0.000582748
8581	Tb427-110091600	4.13825e-05	0.00990099	9.30577e-05	0.470059	3.71682	FALSE	2906.41	0.100422	0.904031	2.83957	0.000589467
4544	Tb427-080008400	3.99937e-06	0.00990099	9.33266e-05	0.707383	1.00008	FALSE	4634.25	0.201102	0.810353	1.67998	0.000590784
5074	Tb427-080064800	5.56606e-06	0.00990099	9.44806e-05	0.631743	1.00019	FALSE	3139.53	0.112053	0.892579	1.99647	0.000597699
8994	Tb427-110141100	9.61957e-05	0.00990099	9.52456e-05	0.780322	2.5375	FALSE	4278.83	0.177703	0.830279	1.74279	0.000602146
8787	Tb427-110120000	2.50601e-06	0.00990099	9.58069e-05	0.752428	3.4633	FALSE	3612.09	0.137353	0.870591	2.18654	0.0006053
9018	Tb427-110143500	4.10832e-05	0.00990099	9.78029e-05	0.821517	3.75768	FALSE	3397.39	0.125287	0.881585	2.65889	0.000617508
6773	Tb427-100070300	-1.72353e-07	0.00990099	9.80488e-05	0.696993	1.00023	FALSE	2798.69	0.0960837	0.905405	2.38049	0.000618658
8732	Tb427-110108000	0.000118658	0.00990099	9.81133e-05	0.229776	3.156	FALSE	3225.37	0.116306	0.888456	2.04924	0.000618663
4266	Tb427-070059600	8.5914e-05	0.00990099	9.90339e-05	0.108448	2.62789	FALSE	5061.59	0.229104	0.791571	1.63908	0.000624062
3456	Tb427-060024700	0.000578779	0.00990099	9.93842e-05	0.63879	3.29569	FALSE	2996.37	0.105027	0.897389	1.82807	0.000625863
6669	Tb427-100059600	0.000120888	0.00990099	0.000101628	0.152982	3.80248	FALSE	3247.77	0.117789	0.886853	2.56332	0.000639574
1928	Tb427-030018100	0.0379882	0.00990099	0.000102254	0.0742993	4.35829	FALSE	10783.9	1.02766	0.311269	1.18232	0.000643101
2907	Tb427-050013700	0.000239262	0.00990099	0.000102429	0.85847	4.21264	FALSE	2138.57	0.0659636	0.934952	2.42151	0.000643786
3848	Tb427-070015100:pseudogene	0.000231527	0.00990099	0.000103588	0.232365	3.56948	FALSE	2444.07	0.0789689	0.922584	2.82352	0.000650645
2192	Tb427-030047800	8.03061e-06	0.00990099	0.000104479	0.379994	3.72349	FALSE	2662.2	0.0888744	0.915483	3.0706	0.000655815
4763	Tb427-080032800	8.00756e-06	0.00990099	0.000105843	0.929348	3.54685	FALSE	5113.9	0.231071	0.79432	1.47693	0.00066395
3624	Tb427-060043100	2.84129e-05	0.00990099	0.000109776	0.365457	2.4702	FALSE	3594.34	0.136226	0.87082	1.77582	0.000687729
7394	Tb427-100136100	0.00695368	0.00990099	0.000109713	0.822638	3.99565	FALSE	6862.18	0.385821	0.663536	1.38674	0.000687729
1908	Tb427-030016100	1.5689e-05	0.00990099	0.000110298	0.973671	2.94571	FALSE	4116.31	0.166311	0.844938	1.92438	0.000690553
4770	Tb427-080033500	6.19751e-05	0.00990099	0.000110667	0.539078	3.59287	FALSE	4404.64	0.184498	0.829134	1.92667	0.000692415
3269	Tb427-050052400	9.0554e-06	0.00990099	0.000110944	0.228094	4.58103	FALSE	4258.45	0.175855	0.835776	1.93092	0.000693706
6476	Tb427-100040200	0.000614067	0.00990099	0.000111483	0.225868	4.47107	FALSE	6136.56	0.315318	0.721255	1.42789	0.000696624
272	Tb427-000276300	3.22532e-05	0.00990099	0.000112393	0.193292	3.64259	FALSE	2429.18	0.078631	0.922584	3.00824	0.000701857
8356	Tb427-110069100:pseudogene	0.00360478	0.00990099	0.000113377	0.693605	4.23969	FALSE	1587.47	0.0443185	0.955108	3.45231	0.000707546
6792	Tb427-100072200	9.11443e-05	0.00990099	0.000114706	0.758553	3.47731	FALSE	1863.06	0.0549764	0.94503	3.02318	0.000715379
6737	Tb427-100066500	0.000542685	0.00990099	0.000115957	0.0837708	1.58373	FALSE	3791.2	0.147253	0.860284	1.65009	0.000722718
1693	Tb427-020022600	0.0138401	0.00990099	0.000116183	0.516647	2.69687	FALSE	10844.3	1.0577	0.293633	1.20034	0.000723662
6587	Tb427-100051400	0.000118454	0.00990099	0.000117328	0.799977	4.3151	FALSE	2048.63	0.0622906	0.937929	2.31091	0.000730328
2718	Tb427-040046700	0.00622978	0.00990099	0.000118296	0.380677	3.20839	FALSE	3256.34	0.117744	0.886166	2.04826	0.000735877
6764	Tb427-100069400	0.000319347	0.00990099	0.000118681	0.384098	3.69624	FALSE	2222.17	0.0692802	0.932203	2.51295	0.000737797
5396	Tb427-090014900	0.00168032	0.00990099	0.000118884	0.536007	3.40409	FALSE	2309.87	0.0727142	0.929455	2.60393	0.000738519
6490	Tb427-100041600	0.00178502	0.00990099	0.000118949	0.917903	4.68053	FALSE	2890.97	0.0996687	0.903115	2.3063	0.000738519
5949	Tb427-090072700	0.000715794	0.00990099	0.000119334	0.175284	4.60284	FALSE	6475.68	0.341497	0.709803	2.09191	0.000740439
4692	Tb427-080025700	2.14512e-05	0.00990099	0.000119788	0.773225	2.95831	FALSE	4294.16	0.17817	0.831425	1.83986	0.000742779
3399	Tb427-060017900	0.000123625	0.00990099	0.000121099	0.108063	4.29969	FALSE	4840.22	0.214234	0.801878	1.8125	0.00075043
4616	Tb427-080017700	0.000221402	0.00990099	0.000121247	0.560956	4.12551	FALSE	2947.06	0.102757	0.899679	2.05179	0.000750861
8874	Tb427-110128700	1.16581e-05	0.00990099	0.000121765	0.622311	3.66893	FALSE	3473.37	0.129385	0.878378	2.56616	0.000753588
7206	Tb427-100116700	0.00107921	0.00990099	0.000124689	0.999491	4.75246	FALSE	6347.71	0.336312	0.701099	1.5544	0.000771192
9450	Tb427-110187500	0.00039639	0.00990099	0.000125438	0.539117	3.92921	FALSE	4650.49	0.200921	0.813559	1.44073	0.000775337
9456	Tb427-110188100	0.000199826	0.00990099	0.000125536	0.729427	3.4514	FALSE	5008.49	0.226038	0.792258	1.88939	0.000775443
1600	Tb427-020013000	3.51947e-05	0.00990099	0.000127102	0.0995773	1.50161	FALSE	3776.37	0.146825	0.860284	1.79773	0.000784617
6891	Tb427-100083400	0.00562642	0.00990099	0.000127496	0.479821	4.27113	FALSE	5757.95	0.284278	0.741869	1.40896	0.000786547
2939	Tb427-050016900	0.00149202	0.00990099	0.000127898	0.268511	3.0704	FALSE	3622.61	0.137597	0.86853	1.47258	0.000788531
3929	Tb427-070023900	0.000472002	0.00990099	0.000128454	0.776977	3.61537	FALSE	4516.04	0.19242	0.819514	1.90882	0.000791455
6304	Tb427-100022100	4.45746e-06	0.00990099	0.000129532	0.605437	1.00012	FALSE	3835.02	0.150632	0.855703	1.82906	0.000797587
7765	Tb427-110009200	0.0241322	0.00990099	0.000133511	0.632924	1.00026	FALSE	12963.5	2.13816	0.0542831	1.08033	0.000821566
6583	Tb427-100051000	0.00010583	0.00990099	0.000134092	0.537248	2.76982	FALSE	4297.84	0.178392	0.832112	1.64448	0.000824617
3764	Tb427-070006600	0.000196454	0.00990099	0.000134798	0.208059	3.00578	FALSE	3917.56	0.154088	0.855932	1.55971	0.000827385
8069	Tb427-110040000	0.00330848	0.00990099	0.000134751	0.485396	4.02263	FALSE	6834.6	0.384673	0.661475	1.40824	0.000827385
9471	Tb427-110189600	0.000167981	0.00990099	0.000134753	0.984395	4.57477	FALSE	6134.36	0.315855	0.719423	1.62834	0.000827385
1830	Tb427-030008300	0.000281084	0.00990099	0.000135063	0.719462	2.75548	FALSE	4895.43	0.217411	0.800504	1.55741	0.000828486
8374	Tb427-110070900	0.00359549	0.00990099	0.000135309	0.313791	3.28436	FALSE	7792.96	0.490464	0.589785	1.41947	0.000829473
2364	Tb427-040010100	0.00111894	0.00990099	0.000135561	0.85641	3.65468	FALSE	1823	0.0529765	0.948236	3.41896	0.000830495
8909	Tb427-110132500	0.00156853	0.00990099	0.000135783	0.674669	3.59823	FALSE	4295.68	0.176974	0.835547	1.56187	0.000831327
4824	Tb427-080039000	0.0146015	0.00990099	0.000136013	0.529211	4.42287	FALSE	4000.68	0.159098	0.849519	1.59245	0.000832208
9378	Tb427-110180200	0.000104795	0.00990099	0.000139399	0.646713	4.18595	FALSE	1501.13	0.0413243	0.960147	6.71294	0.000852393
5256	Tb427-080083400	0.000986505	0.00990099	0.000139704	0.722668	3.80146	FALSE	3478.16	0.129893	0.875401	1.71417	0.000853718
5393	Tb427-090014600	1.87369e-06	0.00990099	0.000140024	0.925355	1.47758	FALSE	2752.98	0.0933978	0.909528	2.36847	0.000855135
7679	Tb427-100167300	1.83144e-05	0.00990099	0.000140434	0.200967	3.94353	FALSE	2498.92	0.0815639	0.920522	3.19849	0.000857096
4618	Tb427-080017900	5.26345e-05	0.00990099	0.000140817	0.105643	3.18391	FALSE	3503.96	0.131775	0.872423	1.70738	0.000858896
3516	Tb427-060032300	5.53697e-06	0.00990099	0.000143563	0.547914	1.00023	FALSE	3238.86	0.117513	0.886166	1.96376	0.000875093
3870	Tb427-070017400	0.00718189	0.00990099	0.000143932	0.650651	3.62877	FALSE	5753.92	0.285683	0.736601	1.29909	0.000876243
8129	Tb427-110046200	0.000402381	0.00990099	0.000143844	0.30271	4.07779	FALSE	3804.9	0.14695	0.864865	2.44825	0.000876243
7292	Tb427-100125800	9.75151e-05	0.00990099	0.000145133	0.551699	4.25783	FALSE	2135.84	0.0656527	0.935868	2.51693	0.000882999
5795	Tb427-090056300	3.5343e-06	0.00990099	0.000145256	0.664601	1.00009	FALSE	2812.31	0.0959045	0.907696	2.14003	0.000883191
4853	Tb427-080042000:pseudogene	0.000116516	0.00990099	0.000146712	0.746084	2.00198	FALSE	3265.98	0.118603	0.88525	1.80107	0.000891486
1914	Tb427-030016700	2.81595e-05	0.00990099	0.000147237	0.943807	4.07223	FALSE	2126.38	0.0654928	0.936097	3.44105	0.000893688
4579	Tb427-080011900	0.00618696	0.00990099	0.000147259	0.494563	4.3411	FALSE	5672.42	0.277103	0.748053	1.77273	0.000893688
1364	Tb427-010014400	0.000541642	0.00990099	0.000148536	0.415393	4.32098	FALSE	5656.18	0.276211	0.748969	1.78353	0.000900879
4067	Tb427-070039700	0.000140501	0.00990099	0.000149034	0.830417	4.39654	FALSE	4359.62	0.182917	0.825928	2.46437	0.000903332
1457	Tb427-010025200	0.00343183	0.00990099	0.000149368	0.534417	3.20498	FALSE	2997.44	0.104957	0.896702	1.69144	0.000904793
3207	Tb427-050044600	0.000894987	0.00990099	0.00015038	0.0217718	3.67093	FALSE	6573.28	0.357066	0.685295	1.49225	0.000910354
3585	Tb427-060039200	0.000107165	0.00990099	0.00015065	0.248603	3.62846	FALSE	2636.81	0.0872444	0.918461	2.53951	0.000911418
2873	Tb427-050010200	5.41237e-05	0.00990099	0.000152217	0.744961	3.7059	FALSE	2686.97	0.0896367	0.915483	2.8696	0.000920322
4323	Tb427-070065500	0.000443573	0.00990099	0.000153934	0.68565	2.16266	FALSE	6295.49	0.327688	0.7153	1.39337	0.000930124
2303	Tb427-030059300	9.77543e-05	0.00990099	0.000156949	0.691269	3.42723	FALSE	4459.43	0.189018	0.822034	1.78054	0.000947753
3017	Tb427-050025200	0.000169839	0.00990099	0.000159675	0.0838782	2.7266	FALSE	3068.21	0.108571	0.894411	1.84571	0.000963616
4045	Tb427-070037500	2.28023e-05	0.00990099	0.000159846	0.954605	2.65545	FALSE	4973.86	0.22311	0.795465	1.69123	0.000964046
2691	Tb427-040043400	0.00131038	0.00990099	0.000160593	0.22908	2.5954	FALSE	2703.6	0.0905084	0.912277	1.89898	0.000967523
5882	Tb427-090065400	0.00052225	0.00990099	0.000160622	0.993093	2.74256	FALSE	6511.73	0.351496	0.689418	1.34566	0.000967523
5706	Tb427-090047400	2.38454e-05	0.00990099	0.000162126	0.356919	3.69291	FALSE	2172.8	0.0674097	0.934265	2.05867	0.000975977
4780	Tb427-080034600	1.42706e-05	0.00990099	0.00016238	0.161222	1.00003	FALSE	2491.56	0.0812801	0.919606	2.16748	0.000976901
2904	Tb427-050013400:pseudogene	0.0162331	0.00990099	0.000162557	0.280387	4.24186	FALSE	8557	0.592744	0.523362	1.24379	0.000977359
1503	Tb427-010031000	0.00237319	0.00990099	0.000163215	0.281379	3.97539	FALSE	9403.61	0.726943	0.450069	1.42005	0.000980706
3476	Tb427-060026700	9.84127e-05	0.00990099	0.000163476	0.295626	3.68526	FALSE	2503.09	0.0813053	0.922584	2.89381	0.00098106
4207	Tb427-070053700	7.86825e-05	0.00990099	0.000163388	0.0723018	4.05962	FALSE	1997.82	0.0599618	0.94251	2.98308	0.00098106
2667	Tb427-040041000:pseudogene	0.00225198	0.00990099	0.000163946	0.592062	3.91552	FALSE	4795.1	0.21171	0.800275	2.09811	0.000983273
3568	Tb427-060037500	5.15594e-05	0.00990099	0.000166085	0.0972161	4.73496	FALSE	4718.36	0.204864	0.813101	2.01294	0.000995481
7437	Tb427-100140400	9.18941e-07	0.00990099	0.00016891	0.19988	1.00012	FALSE	3566.23	0.134924	0.871965	1.96437	0.00101179
9129	Tb427-110155100	0.000162388	0.00990099	0.00016926	0.769445	3.15976	FALSE	4732.19	0.205372	0.814017	1.77269	0.00101326
7308	Tb427-100127400	4.87491e-05	0.00990099	0.000170779	0.520972	3.42528	FALSE	3831.86	0.149319	0.860971	2.30273	0.00102173
3597	Tb427-060040400	5.11011e-05	0.00990099	0.000172124	0.285368	2.97715	FALSE	6803.11	0.3781	0.672698	1.40108	0.00102913
4448	Tb427-070078900	0.000627902	0.00990099	0.000173449	0.0529001	4.28776	FALSE	4136.68	0.16796	0.841503	1.65958	0.00103642
9444	Tb427-110186900	0.000162582	0.00990099	0.000174526	0.935164	3.49765	FALSE	2488.21	0.0805939	0.9235	3.05914	0.00104221
7029	Tb427-100097800	0.000539194	0.00990099	0.000177166	0.228295	3.88753	FALSE	2159.64	0.0667405	0.934036	2.12832	0.00105733
7360	Tb427-100132600	1.15274e-05	0.00990099	0.000180666	0.218101	3.51969	FALSE	4050.43	0.161836	0.851351	1.95295	0.00107755
6491	Tb427-100041700	0.00010641	0.00990099	0.000181119	0.428192	4.27454	FALSE	4986.42	0.223977	0.795236	1.71795	0.00107959
5037	Tb427-080061100	2.95428e-05	0.00990099	0.000183625	0.297818	3.69556	FALSE	4565.2	0.195312	0.819056	1.60063	0.00109385
1640	Tb427-020017300	1.1011e-05	0.00990099	0.000183823	0.378526	4.0998	FALSE	2675.11	0.0895707	0.91388	2.02723	0.00109436
7054	Tb427-100100300	0.000152717	0.00990099	0.000184271	0.699971	3.67495	FALSE	4897.77	0.216912	0.803023	2.08504	0.00109635
9453	Tb427-110187800	0.00233071	0.00990099	0.000184546	0.95704	3.55933	FALSE	4986.72	0.224217	0.793175	1.66459	0.00109732
7381	Tb427-100134800	0.00234783	0.00990099	0.000184729	0.788351	4.28024	FALSE	7635.38	0.4664	0.612918	1.40841	0.00109774
8044	Tb427-110037500	0.00378813	0.00990099	0.00018649	0.328834	3.64054	FALSE	8160.32	0.540146	0.553825	1.26944	0.00110752
1788	Tb427-020032200	0.0022198	0.00990099	0.000187847	0.696171	4.60508	FALSE	3805.11	0.147566	0.861429	1.82718	0.00111489
1905	Tb427-030015800	6.65778e-06	0.00990099	0.000188196	0.60177	3.7202	FALSE	3978.21	0.158	0.853184	2.66099	0.00111584
2474	Tb427-040021100	0.00273777	0.00990099	0.000188237	0.258908	4.56919	FALSE	6538.79	0.348736	0.701099	1.83075	0.00111584
2307	Tb427-030059700	0.00104106	0.00990099	0.000189305	0.319379	3.88042	FALSE	5075.02	0.230698	0.787219	1.73688	0.00112149
5924	Tb427-090070000	0.000439896	0.00990099	0.000191479	0.925449	3.29093	FALSE	4231.03	0.172869	0.840128	1.96189	0.00113368
1280	Tb427-010006000	0.00035442	0.00990099	0.000191601	0.838531	3.31559	FALSE	1844.83	0.0541822	0.945488	3.2849	0.00113371
5271	Tb427-080085100	1.38809e-05	0.00990099	0.000191732	0.6437	1.00009	FALSE	3341.28	0.12245	0.882959	1.87269	0.00113379
7487	Tb427-100146000	0.00064832	0.00990099	0.000192134	0.688529	3.43724	FALSE	9391.04	0.721383	0.456024	1.3711	0.00113547
3065	Tb427-050030400	0.000617003	0.00990099	0.000193318	0.894066	3.60223	FALSE	5290.6	0.245686	0.778287	1.4421	0.00114178
3776	Tb427-070007800	0.00093328	0.00990099	0.000194188	0.592331	4.20585	FALSE	2538.88	0.0828353	0.920293	3.31522	0.00114622
5006	Tb427-080058000	2.25321e-05	0.00990099	0.000198078	0.668832	2.29465	FALSE	3873.72	0.151759	0.858452	1.65416	0.00116776
5234	Tb427-080080900	0.000641707	0.00990099	0.00019801	0.960524	3.71005	FALSE	1645.76	0.0464437	0.95694	4.29136	0.00116776
245	Tb427-000272300:pseudogene	0.000268348	0.00990099	0.000199114	0.246541	2.33298	FALSE	459.371	0.00972473	0.989922	16.1485	0.00117315
7080	Tb427-100102900	0.00147116	0.00990099	0.000202012	0.592637	4.57857	FALSE	2124.81	0.0650463	0.936326	2.55652	0.0011895
4996	Tb427-080057000:pseudogene	6.68945e-06	0.00990099	0.000203617	0.318127	1.00017	FALSE	3673.62	0.141613	0.861887	1.83752	0.00119823
7584	Tb427-100155900	0.000174467	0.00990099	0.000204792	0.963614	4.13573	FALSE	7338.06	0.437127	0.625744	1.67371	0.00120441
9012	Tb427-110142900	0.000176224	0.00990099	0.000205267	0.975914	4.20031	FALSE	2909.61	0.100469	0.903802	2.12548	0.00120574
6748	Tb427-100067800	2.76034e-05	0.00990099	0.000205261	0.242572	1.00009	FALSE	3203.36	0.115548	0.888227	1.86699	0.00120574
2257	Tb427-030054700	0.000140115	0.00990099	0.000206131	0.270178	3.02426	FALSE	2465.53	0.0799623	0.921438	1.94591	0.00121009
8008	Tb427-110033800	3.22777e-06	0.00990099	0.000207055	0.70086	1.00011	FALSE	3071.93	0.108872	0.894411	2.06155	0.00121477
2724	Tb427-040047300	0.0354921	0.00990099	0.000207732	0.400296	3.75666	FALSE	6793.73	0.378574	0.668804	1.44179	0.00121801
5110	Tb427-080068400	0.00136351	0.00990099	0.000208033	0.84402	3.7233	FALSE	4558.16	0.195084	0.816537	1.70902	0.00121904
7713	Tb427-100170700	0.000244487	0.00990099	0.000211203	0.639765	4.34815	FALSE	2817.19	0.0963678	0.905405	2.632	0.00123686
9212	Tb427-110163400	0.000104125	0.00990099	0.000215698	0.271518	3.40814	FALSE	4028.74	0.161269	0.848603	1.5218	0.00126242
9053	Tb427-110147300	0.00147394	0.00990099	0.000218969	0.66497	3.09999	FALSE	1402.92	0.0376158	0.962666	2.32745	0.00128079
7962	Tb427-110029200	0.00177101	0.00990099	0.000222547	0.244737	3.09536	FALSE	8953.35	0.649983	0.496106	1.32334	0.00130094
8181	Tb427-110051500	0.000411913	0.00990099	0.000222854	0.299568	3.91234	FALSE	3628.49	0.137736	0.870362	2.39489	0.00130195
1670	Tb427-020020300	0.00011726	0.00990099	0.000224568	0.428197	4.06701	FALSE	3680.47	0.14061	0.868071	2.03065	0.00131117
3082	Tb427-050032100	0.0028907	0.00990099	0.000225227	0.740393	4.25457	FALSE	7313.59	0.431187	0.635364	1.63186	0.00131423
3303	Tb427-060007900	0.00101228	0.00990099	0.000227022	0.765088	3.64301	FALSE	3907.08	0.154177	0.853413	1.83966	0.00132391
5810	Tb427-090057800	0.000253955	0.00990099	0.00022956	0.44129	4.2703	FALSE	2714.92	0.0911435	0.912277	3.16328	0.00133791
3553	Tb427-060036000	0.000542605	0.00990099	0.000237079	0.911967	3.59199	FALSE	5420.39	0.256592	0.767064	1.65162	0.00138089
262	Tb427-000274500:pseudogene	0.000175748	0.00990099	0.0002389	0.900879	3.94809	FALSE	1761	0.0507241	0.950756	4.10045	0.00139067
6441	Tb427-100036700	0.000727132	0.00990099	0.000239231	0.598655	3.42531	FALSE	1937.65	0.0574575	0.944343	2.48333	0.00139176
5862	Tb427-090063400	0.0026519	0.00990099	0.000243044	0.749943	2.95754	FALSE	5013.12	0.226941	0.787678	1.50267	0.00141309
6570	Tb427-100049700	0.00472915	0.00990099	0.000246375	0.878688	3.72786	FALSE	7302.12	0.432728	0.628951	1.2644	0.0014316
4664	Tb427-080022800	0.000757426	0.00990099	0.000247006	0.22473	3.75192	FALSE	6641.38	0.364137	0.678882	1.32063	0.00143441
2722	Tb427-040047100	0.00138331	0.00990099	0.000249608	0.71465	4.59092	FALSE	2834.96	0.0966208	0.907696	3.12689	0.00144865
4697	Tb427-080026200	0.00342486	0.00990099	0.000250651	0.977313	4.1406	FALSE	5085.18	0.229753	0.792258	1.66307	0.00145384
1719	Tb427-020025300	3.72022e-06	0.00990099	0.000251411	0.777373	1.00019	FALSE	2691.27	0.0902835	0.912735	2.19003	0.00145737
5851	Tb427-090062300	0.00113669	0.00990099	0.000254557	0.199155	3.19693	FALSE	2713.95	0.0904501	0.915483	2.12173	0.00147473
3829	Tb427-070013200	0.000226964	0.00990099	0.000258446	0.17781	4.12842	FALSE	4028.94	0.161859	0.845625	2.03881	0.00149637
8939	Tb427-110135500	0.00286235	0.00990099	0.000260788	0.313379	3.11941	FALSE	5996.24	0.303806	0.72721	1.47781	0.00150902
8103	Tb427-110043600	0.000607484	0.00990099	0.000261073	0.574785	2.92572	FALSE	4876.67	0.217327	0.79661	1.50119	0.00150977
4351	Tb427-070068300	0.000998355	0.00990099	0.000263947	0.865934	3.33494	FALSE	5143.24	0.233047	0.791342	1.60682	0.00152457
6710	Tb427-100063800:pseudogene	0.000994685	0.00990099	0.000263797	0.43834	4.22556	FALSE	4896.69	0.216778	0.802565	1.96049	0.00152457
3753	Tb427-070005500	0.00053861	0.00990099	0.000265402	0.471346	2.93454	FALSE	5146.37	0.23655	0.781722	1.53307	0.00153207
3698	Tb427-060051100	0.000285214	0.00990099	0.000266352	0.497311	1.00003	FALSE	6678.85	0.365565	0.682776	1.35346	0.00153663
6102	Tb427-090089600	0.00547243	0.00990099	0.000269911	0.653849	3.39146	FALSE	6582.22	0.356796	0.686899	1.49567	0.00155624
4369	Tb427-070070100	0.00156291	0.00990099	0.000271297	0.126456	4.21564	FALSE	4539.86	0.192551	0.822492	1.69102	0.0015633
2655	Tb427-040039800	0.0012772	0.00990099	0.000277438	0.615651	3.38998	FALSE	3473.42	0.129283	0.876775	1.94203	0.00159774
2329	Tb427-040006600	9.61829e-05	0.00990099	0.000279045	0.828016	4.21081	FALSE	5887.14	0.293837	0.738204	1.97641	0.00160604
7896	Tb427-110022500	0.00218172	0.00990099	0.000281307	0.963458	2.60251	FALSE	2666.79	0.0889322	0.912506	1.84524	0.0016181
5831	Tb427-090059900	0.00028215	0.00990099	0.000284633	0.00214788	3.80611	FALSE	3792.67	0.146932	0.862574	1.65846	0.00163626
2043	Tb427-030030900	5.67826e-05	0.00990099	0.000286571	0.428822	3.22912	FALSE	4490.46	0.189591	0.825928	1.80322	0.00164642
4251	Tb427-070058100	0.000337082	0.00990099	0.000293979	0.430379	2.96607	FALSE	2812.15	0.0955839	0.907925	2.18203	0.00168799
4962	Tb427-080053300	0.00291981	0.00990099	0.000294931	0.749184	3.6238	FALSE	5028.58	0.227222	0.789968	1.36795	0.00169245
9027	Tb427-110144400	0.00201417	0.00990099	0.000299993	0.555113	3.13144	FALSE	4459.68	0.188256	0.823637	1.74382	0.00172048
1483	Tb427-010028600	0.00062909	0.00990099	0.000300236	0.530484	3.63048	FALSE	4052.6	0.162236	0.848374	2.33258	0.00172086
1508	Tb427-010031500	0.000360267	0.00990099	0.000301804	0.395952	3.32873	FALSE	1961.97	0.0584417	0.943656	2.94449	0.00172882
2899	Tb427-050012900	0.164858	0.00990099	0.000305442	0.879176	2.11296	FALSE	12869.3	2.20009	0.0348145	1.06029	0.00174863
4896	Tb427-080046300	0.000195848	0.00990099	0.000305781	0.230459	2.95363	FALSE	5073.74	0.228892	0.79432	1.58371	0.00174954
4241	Tb427-070057100	0.000404487	0.00990099	0.000306056	0.796858	3.14191	FALSE	3025.98	0.106441	0.896244	2.07155	0.00175008
955	Tb427-000757800	0.00021675	0.00990099	0.000309246	0.417413	3.77794	FALSE	2040.74	0.0623099	0.936555	3.19639	0.00176728
9483	MURF4	0.0067473	0.00990099	0.00031109	0.650087	3.27481	FALSE	7560.89	0.46023	0.611773	1.45172	0.00177677
5937	Tb427-090071500	0.000265246	0.00990099	0.000311559	0.749908	3.30775	FALSE	3615.46	0.137676	0.867613	1.57695	0.0017784
9190	Tb427-110161200	0.00220888	0.00990099	0.000312385	0.945251	3.44557	FALSE	6043.44	0.307662	0.725149	1.61496	0.00178206
3942	Tb427-070025400	0.000595415	0.00990099	0.000314828	0.957645	3.12811	FALSE	6011.86	0.303532	0.731562	1.6975	0.00179494
6454	Tb427-100038000	0.000241359	0.00990099	0.000316028	0.143256	1.74026	FALSE	4009.89	0.161026	0.844938	1.64023	0.00180073
8568	Tb427-110090300	0.000786581	0.00990099	0.000317581	0.662321	3.25409	FALSE	3781.89	0.146099	0.863491	2.07537	0.00180851
1639	Tb427-020017200	2.48603e-05	0.00990099	0.000320345	0.0394257	2.26956	FALSE	2958.61	0.102708	0.901741	2.03863	0.00182318
5283	Tb427-080086300:pseudogene	7.44103e-05	0.00990099	0.000321559	0.665408	3.01767	FALSE	2374.21	0.0756117	0.927393	2.50409	0.00182902
7366	Tb427-100133300	0.000844873	0.00990099	0.000322261	0.150004	3.59119	FALSE	7073.48	0.405205	0.653917	1.59753	0.00183194
7212	Tb427-100117300	0.000512132	0.00990099	0.000322524	0.496484	3.7322	FALSE	4363.17	0.182324	0.828905	1.88267	0.00183236
2855	Tb427-050008300	3.42425e-05	0.00990099	0.000323504	0.295222	1.00295	FALSE	2694.5	0.0899018	0.914338	2.05408	0.00183685
2470	Tb427-040020700	0.00243056	0.00990099	0.00032464	0.626796	3.47271	FALSE	6676.39	0.365819	0.680715	1.48621	0.00184122
7525	Tb427-100150000	0.000171294	0.00990099	0.000324653	0.590847	3.57788	FALSE	4078.61	0.164393	0.845396	2.05387	0.00184122
3896	Tb427-070020000	0.00234217	0.00990099	0.00032629	0.412851	3.44435	FALSE	2932.84	0.101508	0.901512	1.65161	0.00184942
8414	Tb427-110074900	2.63082e-05	0.00990099	0.000327192	0.393789	1.00025	FALSE	5485.76	0.262866	0.75836	1.51015	0.00185345
4877	Tb427-080044400	0.0176	0.00990099	0.000331407	0.178926	4.77224	FALSE	2561.13	0.0835856	0.919606	2.23952	0.00187623
8489	Tb427-110082400	0.000212436	0.00990099	0.000332665	0.708371	2.7276	FALSE	5254.62	0.243561	0.777829	1.60765	0.00188225
3989	Tb427-070030100	0.000222707	0.00990099	0.000334857	0.725281	4.02972	FALSE	3252.32	0.117992	0.885937	1.93706	0.00189355
1567	Tb427-020009500	0.00034452	0.00990099	0.000343839	0.560375	3.66494	FALSE	3239.45	0.117193	0.887082	2.0348	0.00194321
411	Tb427-000481200:pseudogene	0.000101928	0.00990099	0.000347768	0.297477	3.87496	FALSE	4790.79	0.208881	0.811269	1.50483	0.00196427
2034	Tb427-030030000	0.00114864	0.00990099	0.000348389	0.329292	3.03426	FALSE	1725.57	0.0491496	0.952359	2.96625	0.00196663
7334	Tb427-100130000	0.000533094	0.00990099	0.00034933	0.626599	3.84067	FALSE	6550.3	0.353374	0.692396	1.71231	0.0019708
4562	Tb427-080010200:pseudogene	0.000432478	0.00990099	0.000349889	0.235752	2.99266	FALSE	2908.88	0.100476	0.902199	2.07314	0.0019728
7224	Tb427-100118500	0.00130885	0.00990099	0.000350898	0.760902	2.90913	FALSE	4697.05	0.204165	0.809437	1.41408	0.00197734
7232	Tb427-100119300	0.00052945	0.00990099	0.00035136	0.624475	2.5938	FALSE	2736.74	0.0918591	0.912735	1.92991	0.0019788
9192	Tb427-110161400	1.68214e-05	0.00990099	0.000352018	0.974225	3.61109	FALSE	2554.26	0.0839641	0.918919	3.37755	0.00198135
4271	Tb427-070060100	0.000137618	0.00990099	0.000355501	0.868019	3.35791	FALSE	2787.05	0.0944267	0.909528	2.57317	0.00199979
2175	Tb427-030045800	0.00256007	0.00990099	0.000355961	0.940337	3.13055	FALSE	8847.32	0.633629	0.501832	1.27649	0.00200122
9404	Tb427-110182900	0.0116114	0.00990099	0.000357793	0.959353	4.30612	FALSE	4332.67	0.180508	0.828218	1.9852	0.00201036
8698	Tb427-110104600	0.000277525	0.00990099	0.000360408	0.996574	2.46915	FALSE	5439.63	0.25967	0.759276	1.53505	0.00202387
2296	Tb427-030058600	0.000458431	0.00990099	0.000361051	0.237221	4.4779	FALSE	5135.81	0.233424	0.790426	1.58307	0.00202632
8935	Tb427-110135100	9.79703e-05	0.00990099	0.000362901	0.971971	3.27231	FALSE	5112.71	0.232394	0.790197	1.58682	0.00203552
6348	Tb427-100026900	5.60796e-05	0.00990099	0.000370237	0.968908	3.52029	FALSE	5279.71	0.246273	0.774622	1.96336	0.00207547
3354	Tb427-060013000	0.000241445	0.00990099	0.000370597	0.888135	3.06742	FALSE	4636.99	0.199986	0.814246	1.60862	0.00207628
5002	Tb427-080057600	0.000165469	0.00990099	0.000371224	0.339914	3.51334	FALSE	3094.22	0.109862	0.893953	1.83008	0.0020786
2931	Tb427-050016100	0.00218256	0.00990099	0.000373828	0.0757867	4.32766	FALSE	5300.63	0.245723	0.779432	1.51629	0.00209197
4969	Tb427-080054000	0.00288295	0.00990099	0.000374695	0.466489	4.77428	FALSE	4594.06	0.195939	0.820431	1.98807	0.00209561
3343	Tb427-060011900	0.0117919	0.00990099	0.000376253	0.72972	4.28972	FALSE	6122.28	0.312342	0.725607	1.42527	0.00210312
1668	Tb427-020020100	0.00060299	0.00990099	0.000378043	0.122777	3.42593	FALSE	6802.25	0.378454	0.671782	1.45604	0.0021119
7550	Tb427-100152500	0.000201532	0.00990099	0.000383119	0.660628	3.43082	FALSE	4535.2	0.193774	0.818598	1.97591	0.00213903
3609	Tb427-060041600	0.000959725	0.00990099	0.000383528	0.633792	3.52687	FALSE	5085.41	0.232877	0.78218	1.80289	0.00214008
1644	Tb427-020017700	7.4772e-05	0.00990099	0.000385298	0.158782	1.00016	FALSE	9762.65	0.788685	0.423958	1.25034	0.00214872
1145	Tb427-000808800:pseudogene	0.000969287	0.00990099	0.000387705	0.417544	4.05063	FALSE	484.439	0.0102027	0.990151	12.9745	0.0021609
7370	Tb427-100133700	0.00121745	0.00990099	0.000390822	0.386018	3.80621	FALSE	2940.69	0.101707	0.902199	3.19481	0.00217702
1642	Tb427-020017500	0.00314293	0.00990099	0.000393459	0.10018	4.38821	FALSE	5717.19	0.280155	0.746679	1.81426	0.00219045
4552	Tb427-080009200	0.0429359	0.00990099	0.000397656	0.800503	4.15951	FALSE	8716.61	0.606276	0.525653	1.33168	0.00221254
3019	Tb427-050025400	0.00144328	0.00990099	0.000398117	0.112187	3.42103	FALSE	4325.15	0.179324	0.832112	1.78427	0.00221257
8241	Tb427-110057600	0.000310635	0.00990099	0.000398087	0.421195	3.80026	FALSE	2689.86	0.08997	0.913422	1.94113	0.00221257
8908	Tb427-110132400	0.0132224	0.00990099	0.000399669	0.603081	4.43826	FALSE	5807.46	0.289467	0.735227	1.70133	0.00221866
8977	Tb427-110139400	0.00015784	0.00990099	0.000399568	0.264133	3.30728	FALSE	3193.65	0.114497	0.891205	2.16402	0.00221866
2311	Tb427-030060100	0.00174443	0.00990099	0.000403179	0.0158772	2.86437	FALSE	3079.58	0.108138	0.898305	1.64367	0.00223686
5056	Tb427-080063000	0.00420116	0.00990099	0.000407003	0.495483	3.26615	FALSE	7504.99	0.455897	0.612231	1.38535	0.00225679
3245	Tb427-050048400	0.000184583	0.00990099	0.000407294	0.0643157	2.86596	FALSE	2852.27	0.0974681	0.907009	2.06553	0.00225711
33	Tb427-000014200	0.00137688	0.00990099	0.000407787	0.191349	4.36668	FALSE	3501.26	0.129787	0.880669	2.61525	0.0022584
5182	Tb427-080075700	0.00272156	0.00990099	0.000407993	0.683152	3.19804	FALSE	4653.04	0.200581	0.813559	1.48326	0.0022584
2031	Tb427-030029700	4.71996e-05	0.00990099	0.000409024	0.923177	3.13982	FALSE	2642.94	0.0875668	0.917316	2.35889	0.00226281
6713	Tb427-100064100	0.000105136	0.00990099	0.000409816	0.282791	3.58547	FALSE	3845.15	0.150762	0.856161	2.10074	0.00226591
6639	Tb427-100056600	3.00639e-05	0.00990099	0.000411467	0.884263	1.00013	FALSE	6674.39	0.366869	0.677966	1.41362	0.00227374
3599	Tb427-060040600	1.90835e-05	0.00990099	0.00041243	0.933513	1.00014	FALSE	3432.43	0.128206	0.874027	1.82698	0.00227776
1870	Tb427-030012300	0.000230043	0.00990099	0.0004135	0.963086	3.38608	FALSE	2669.42	0.0893925	0.912048	2.23166	0.00228237
9300	Tb427-110172200	0.00442123	0.00990099	0.000414079	0.542917	3.82695	FALSE	4962.36	0.222753	0.793404	1.58114	0.00228427
6574	Tb427-100050100:pseudogene	0.000287863	0.00990099	0.000416983	0.443228	3.94241	FALSE	2508.07	0.0817599	0.920064	2.46846	0.00229898
2565	Tb427-040030200	0.000245871	0.00990099	0.000422184	0.530082	4.63094	FALSE	2312.02	0.0732969	0.928081	2.52569	0.00232633
3841	Tb427-070014400	0.00279419	0.00990099	0.000422525	0.913306	3.1618	FALSE	4884	0.216828	0.799817	1.32915	0.00232689
8725	Tb427-110107300	0.0164366	0.00990099	0.000423808	0.993816	3.85451	FALSE	4135.32	0.167738	0.840815	2.05339	0.00233263
9092	Tb427-110151400	0.00611426	0.00990099	0.000433533	0.2449	4.32894	FALSE	6519.84	0.348805	0.698122	1.61056	0.0023848
9361	Tb427-110178500	0.000588309	0.00990099	0.000434059	0.854616	3.3115	FALSE	3548.36	0.133199	0.874027	1.81156	0.00238573
6879	Tb427-100082100	0.000412724	0.00990099	0.000434194	0.864879	3.27193	FALSE	2834.39	0.0969455	0.906093	2.2277	0.00238573
4008	Tb427-070032000	0.00170762	0.00990099	0.000436772	0.79018	3.90716	FALSE	5074.45	0.231082	0.786761	2.1847	0.00239854
4608	Tb427-080016900	0.00444143	0.00990099	0.00044788	0.711562	4.82565	FALSE	4522.31	0.191997	0.821576	2.05106	0.00245814
2000	Tb427-030026600	0.0163787	0.00990099	0.000458233	0.916371	3.14696	FALSE	8390.47	0.574273	0.529088	1.31837	0.00251212
6606	Tb427-100053300	0.000118431	0.00990099	0.000458088	0.206665	1.0001	FALSE	3064.29	0.108181	0.895098	1.8049	0.00251212
7891	Tb427-110022000	0.000150265	0.00990099	0.000460758	0.612803	1.00012	FALSE	4364.79	0.182382	0.82776	1.56248	0.00252454
3733	Tb427-060055100	0.00575126	0.00990099	0.000461716	0.320956	3.52508	FALSE	9667.63	0.780175	0.417316	1.22962	0.00252836
8622	Tb427-110095800	0.00107779	0.00990099	0.000462075	0.536291	3.75821	FALSE	1993.2	0.05958	0.942968	2.18647	0.00252889
5077	Tb427-080065100	0.000230121	0.00990099	0.000476867	0.847559	3.32186	FALSE	3593.61	0.136426	0.869217	1.89283	0.00260838
7358	Tb427-100132400	0.00106929	0.00990099	0.000480743	0.421499	3.41195	FALSE	5409.33	0.25457	0.770499	1.70882	0.0026281
3095	Tb427-050033400	0.000796063	0.00990099	0.000481164	0.535059	4.11241	FALSE	1900.92	0.0560445	0.944801	3.67797	0.00262892
6227	Tb427-100014400	0.00146262	0.00990099	0.000483192	0.536539	3.45247	FALSE	3629.23	0.137543	0.870591	1.83119	0.00263851
1410	Tb427-010020400	0.00028264	0.00990099	0.000485732	0.446473	3.06563	FALSE	3335.39	0.12262	0.880669	1.77289	0.00265014
5728	Tb427-090049600	8.54683e-05	0.00990099	0.000485868	0.45687	4.07646	FALSE	4440.09	0.187643	0.823408	2.11157	0.00265014
6594	Tb427-100052100:pseudogene	0.00166931	0.00990099	0.000493992	0.480495	3.31349	FALSE	4375.48	0.181324	0.834631	1.86304	0.00269294
4424	Tb427-070076500	0.00108819	0.00990099	0.000500591	0.132711	4.14916	FALSE	4732.57	0.206072	0.809666	2.28691	0.00272738
7578	Tb427-100155300	0.0135573	0.019802	0.000500937	0.155725	3.81739	FALSE	6842.78	0.385352	0.660788	1.54341	0.00272773
3969	Tb427-070028100	0.000186534	0.00990099	0.000502489	0.447262	2.57824	FALSE	3483.18	0.130551	0.873339	1.81081	0.00273464
1665	Tb427-020019800	0.00246582	0.00990099	0.000503641	0.963105	2.34308	FALSE	8566.97	0.591597	0.527943	1.24124	0.00273938
3318	Tb427-060009400:pseudogene	0.000444613	0.00990099	0.000504115	0.166542	3.99396	FALSE	5379.4	0.253446	0.768896	1.59297	0.00274042
3601	Tb427-060040800	0.00556269	0.00990099	0.000510339	0.767989	4.73507	FALSE	4196.2	0.171137	0.83967	1.74384	0.0027727
6168	Tb427-100008400	0.0120696	0.00990099	0.000511006	0.376283	3.75999	FALSE	4773.3	0.208263	0.808291	1.37	0.00277477
6843	Tb427-100078500	0.00664335	0.00990099	0.000512023	0.0528573	4.65909	FALSE	3638.3	0.137657	0.871507	2.02173	0.00277718
8351	Tb427-110068600	0.0019634	0.00990099	0.000511738	0.414017	4.18998	FALSE	3776.78	0.146189	0.861658	2.28254	0.00277718
4081	Tb427-070041100	0.00212878	0.00990099	0.000512683	0.271968	4.02184	FALSE	3729.13	0.143145	0.865094	1.65023	0.00277921
2209	Tb427-030049500	0.000167241	0.00990099	0.000514188	0.882129	1.00008	FALSE	4385.78	0.18428	0.82524	1.55374	0.00278471
4003	Tb427-070031500	0.0171114	0.00990099	0.000514272	0.95923	3.97507	FALSE	7073.67	0.409104	0.643839	1.28148	0.00278471
5483	Tb427-090024500	0.000487449	0.00990099	0.000514821	0.396631	2.65342	FALSE	5360.28	0.252512	0.767751	1.39172	0.00278612
2270	Tb427-030056000	0.00580629	0.00990099	0.000520596	0.175934	3.28439	FALSE	4609.26	0.19698	0.819056	1.66179	0.0028158
3688	Tb427-060050100	0.00779248	0.00990099	0.000524727	0.963475	4.08173	FALSE	6967.71	0.39759	0.653459	1.54887	0.00283657
5850	Tb427-090062200	0.0014549	0.00990099	0.000530858	0.967576	4.61441	FALSE	2630.73	0.0871004	0.915483	2.3939	0.00286811
8051	Tb427-110038200	0.0208506	0.00990099	0.000532594	0.470733	2.13688	FALSE	10289.2	0.907447	0.359597	1.16443	0.00287589
7848	Tb427-110017600	0.000416005	0.00990099	0.000537176	0.00124161	4.48537	FALSE	4390.3	0.184044	0.82776	2.10089	0.00289902
2046	Tb427-030031200	0.0150814	0.00990099	0.000539032	0.336002	4.70629	FALSE	7674.51	0.473873	0.603298	1.61919	0.00290741
8743	Tb427-110109100	0.000792508	0.00990099	0.000540435	0.429243	1.76782	FALSE	3880.89	0.151611	0.859139	1.61676	0.00291336
3708	Tb427-060052100	0.000150765	0.00990099	0.000543247	0.940406	1.00016	FALSE	7355.23	0.441773	0.61956	1.33099	0.00292689
6847	Tb427-100078900	0.043306	0.00990099	0.000543604	0.949896	3.66704	FALSE	9021.84	0.668329	0.475492	1.26833	0.00292719
3431	Tb427-060021100	0.000130026	0.00990099	0.000544038	0.732905	3.19534	FALSE	2922.18	0.101556	0.900137	1.82987	0.0029279
2230	Tb427-030052000	0.000202228	0.00990099	0.000544997	0.446641	1.00015	FALSE	4014.89	0.16058	0.847687	1.59417	0.00292981
8226	Tb427-110056100	0.000722298	0.00990099	0.000544817	0.0989584	3.72301	FALSE	2054.93	0.0622891	0.938617	2.28592	0.00292981
1402	Tb427-010019600	0.000746291	0.00990099	0.00054748	0.143763	3.67329	FALSE	1477.03	0.0402323	0.961292	4.64295	0.00294153
1479	Tb427-010028200	0.00342088	0.00990099	0.000550105	0.969417	3.53474	FALSE	3937.64	0.155096	0.855016	2.01943	0.002954
6234	Tb427-100015100	0.00118019	0.00990099	0.000552003	0.67962	3.24198	FALSE	6857.36	0.380184	0.675676	1.37791	0.00296255
3397	Tb427-060017700	1.8897e-05	0.00990099	0.000554757	0.0977543	1.00013	FALSE	2956.35	0.103088	0.89945	1.96635	0.00297568
9462	Tb427-110188700	0.00075229	0.00990099	0.00056195	0.370986	2.12502	FALSE	5298.85	0.24751	0.773706	1.43095	0.0030126
2189	Tb427-030047500	0.00364971	0.00990099	0.000563708	0.129285	4.20146	FALSE	2287.88	0.0715546	0.932432	2.02959	0.00302035
2906	Tb427-050013600	0.00022764	0.00990099	0.000569308	0.922124	4.02127	FALSE	2780.62	0.0942978	0.908841	2.38989	0.00304867
7316	Tb427-100128200	0.00394725	0.00990099	0.000571436	0.0246948	3.82366	FALSE	2357.99	0.0752218	0.924645	1.98304	0.00305838
9160	Tb427-110158200	5.13014e-05	0.00990099	0.000576063	0.872205	2.31647	FALSE	3015.35	0.10583	0.897847	1.9038	0.00308145
712	Tb427-000677800:pseudogene	0.0226726	0.00990099	0.000578517	0.923816	4.85621	FALSE	251.22	0.00467169	0.995648	27.1819	0.00309286
9446	Tb427-110187100	0.00118678	0.00990099	0.000579275	0.845717	2.16941	FALSE	7909.73	0.504505	0.580852	1.31102	0.00309521
7288	Tb427-100125400	0.00023026	0.00990099	0.000580964	0.966628	1.65538	FALSE	3693.38	0.141921	0.864178	1.7041	0.00310253
3781	Tb427-070008300	0.000276885	0.00990099	0.000583688	0.545667	3.8564	FALSE	2155.19	0.0662651	0.937929	2.17708	0.00311536
2144	Tb427-030042500	0.00155702	0.00990099	0.000584212	0.0945642	3.63797	FALSE	5292.69	0.243998	0.783555	1.57874	0.00311644
7533	Tb427-100150800	0.00164258	0.00990099	0.000585645	0.467384	2.29504	FALSE	1615.02	0.0450292	0.956253	2.47796	0.00312236
915	Tb427-000747600	0.00111558	0.00990099	0.00058736	0.927795	3.4718	FALSE	2091.24	0.0635935	0.938388	2.71811	0.00312979
4265	Tb427-070059500	0.00104466	0.00990099	0.000595634	0.336522	3.22021	FALSE	1943.49	0.0576441	0.943656	2.37388	0.00317214
3558	Tb427-060036500	0.000118958	0.00990099	0.000597302	0.452492	4.27615	FALSE	4062.93	0.163861	0.844709	2.33755	0.00317927
6563	Tb427-100049000	0.000249942	0.00990099	0.000602037	0.567509	1.00055	FALSE	2673.19	0.0893905	0.911819	1.85679	0.00320272
3225	Tb427-050046400	0.000314306	0.00990099	0.000609251	0.468523	3.21512	FALSE	1804.49	0.0524406	0.948465	2.45897	0.00323932
4597	Tb427-080013700	0.00021554	0.00990099	0.000611021	0.363444	1.00011	FALSE	4349.34	0.181867	0.827073	1.54663	0.00324695
683	Tb427-000669000	0.000833381	0.00990099	0.000615901	0.836455	3.3816	FALSE	729.919	0.0165994	0.983509	7.08718	0.00327109
5257	Tb427-080083500	0.000384513	0.00990099	0.000617291	0.959796	3.00607	FALSE	4214.14	0.172094	0.840586	1.67566	0.00327668
5278	Tb427-080085800	0.004805	0.00990099	0.000619644	0.973652	4.14636	FALSE	3020.42	0.105081	0.901512	2.23828	0.00328737
7424	Tb427-100139100	0.00151483	0.00990099	0.000624488	0.443965	3.37448	FALSE	3436.24	0.126676	0.881814	1.98221	0.00331126
5420	Tb427-090017300	0.00861778	0.00990099	0.000636966	0.567242	4.55525	FALSE	3614	0.13717	0.868071	1.71822	0.00337557
3024	Tb427-050025900	0.000962714	0.00990099	0.000638511	0.961067	2.83832	FALSE	3687.78	0.140975	0.866697	1.59861	0.00338191
4415	Tb427-070075000	0.000854577	0.00990099	0.000638865	0.798874	3.47245	FALSE	2533.76	0.082764	0.919606	2.07322	0.00338194
3554	Tb427-060036100	0.000774276	0.00990099	0.00064173	0.834978	3.97255	FALSE	5531.59	0.265305	0.760421	1.74603	0.00339525
8308	Tb427-110064300	0.00119673	0.00990099	0.00064257	0.403814	4.25926	FALSE	3943.58	0.155084	0.857077	1.87284	0.00339784
2079	Tb427-030034500	0.000463771	0.00990099	0.000648745	0.628425	3.37884	FALSE	3354.26	0.123385	0.881127	1.95117	0.00342863
5250	Tb427-080082600:pseudogene	0.00379194	0.00990099	0.000649177	0.880143	3.15453	FALSE	1971.81	0.0587532	0.942281	2.08122	0.00342904
2067	Tb427-030033300	0.0809485	0.00990099	0.00065211	0.652831	1.00023	FALSE	12736.2	1.98282	0.0680257	1.06415	0.00344266
7886	Tb427-110021500	0.00347391	0.00990099	0.000652787	0.00244524	3.22117	FALSE	4167.83	0.170169	0.83738	1.58747	0.00344436
5712	Tb427-090048000	0.00261366	0.00990099	0.000653723	0.155127	3.48668	FALSE	4668.37	0.200865	0.81585	1.78617	0.00344742
5503	Tb427-090026500	0.000637329	0.00990099	0.000654495	0.484578	3.2069	FALSE	2134.27	0.0654673	0.935639	2.52492	0.00344962
5280	Tb427-080086000	0.00103565	0.00990099	0.000662998	0.785716	3.28658	FALSE	5504.73	0.263745	0.758589	1.60086	0.00349254
2577	Tb427-040031400	4.35407e-06	0.00990099	0.000664585	0.743361	1.00018	FALSE	2974.19	0.104017	0.898763	2.06384	0.00349899
5614	Tb427-090037700	0.00334346	0.00990099	0.000665941	0.957417	2.95998	FALSE	2447.26	0.0783673	0.927623	1.59934	0.00350423
3362	Tb427-060014200	0.00107555	0.00990099	0.000667874	0.469914	3.89796	FALSE	4856.88	0.214052	0.805543	1.62159	0.0035125
4676	Tb427-080024100	0.00582704	0.00990099	0.000671351	0.979895	3.84933	FALSE	4810.29	0.211518	0.80394	1.66764	0.00352887
7465	Tb427-100143600:pseudogene	0.00195308	0.00990099	0.000682591	0.18576	3.01509	FALSE	5311.86	0.247838	0.773706	1.55283	0.003586
4367	Tb427-070069900	0.00847772	0.00990099	0.000692824	0.724487	3.38672	FALSE	8090.93	0.527116	0.566651	1.34353	0.00363779
4832	Tb427-080039800	0.00183764	0.00990099	0.000708958	0.737292	4.8512	FALSE	2699.81	0.0900919	0.914567	2.72213	0.0037205
6481	Tb427-100040700	0.0779614	0.00990099	0.000715712	0.676087	3.95012	FALSE	2793.5	0.0947722	0.906322	1.67028	0.00375391
7956	Tb427-110028600	0.00761186	0.00990099	0.000720976	0.737238	4.45997	FALSE	7684.6	0.471525	0.609024	1.46741	0.00377947
2502	Tb427-040023900	0.000540784	0.00990099	0.000721448	0.72744	2.94598	FALSE	2416.35	0.0772453	0.926477	1.95564	0.00377991
2408	Tb427-040014500	0.00192227	0.00990099	0.000731703	0.816111	3.86156	FALSE	5520.12	0.262514	0.766148	1.44972	0.0038295
2812	Tb427-040056300	0.00628819	0.00990099	0.000731467	0.432694	4.35317	FALSE	8332.74	0.55548	0.551993	1.53953	0.0038295
5315	Tb427-090005500	0.000268151	0.019802	0.000732621	0.0381658	1.00224	FALSE	2036.77	0.0612638	0.941365	2.16464	0.00383017
7658	Tb427-100164000	0.00245366	0.00990099	0.00073242	0.783183	3.86486	FALSE	3752.46	0.14479	0.863033	1.56241	0.00383017
3846	Tb427-070014900	0.00129543	0.00990099	0.000736145	0.129355	3.75642	FALSE	6983.41	0.401171	0.64842	1.5247	0.00384651
2839	Tb427-050006700	0.00129012	0.00990099	0.000737543	0.159201	4.59203	FALSE	5186.01	0.239191	0.77989	1.81749	0.00385005
6699	Tb427-100062700	0.000136132	0.00990099	0.000737615	0.572532	3.2536	FALSE	2409.57	0.0772881	0.925103	2.33813	0.00385005
4065	Tb427-070039500	0.000113919	0.00990099	0.000740137	0.870527	1.90942	FALSE	3737.83	0.144585	0.861658	1.7223	0.00386114
4781	Tb427-080034700	0.000211751	0.00990099	0.000749922	0.361969	3.92919	FALSE	2757.09	0.0932482	0.909757	2.79242	0.00391008
226	Tb427-000270000:pseudogene	0.00226964	0.00990099	0.000750887	0.738918	4.51221	FALSE	515.899	0.0108584	0.989006	18.5353	0.00391091
1540	Tb427-020006700	0.00387105	0.00990099	0.00075083	0.961276	3.64186	FALSE	3090.53	0.109367	0.893266	1.51497	0.00391091
2928	Tb427-050015800	0.0309192	0.00990099	0.000752113	0.321324	2.5186	FALSE	10266.9	0.931296	0.332799	1.15801	0.00391519
3064	Tb427-050030300	0.00116402	0.00990099	0.000756104	0.376595	3.53883	FALSE	6084.77	0.311622	0.720797	1.64397	0.00393385
6996	Tb427-100094500	0.00294665	0.00990099	0.000757421	0.889751	3.81289	FALSE	3920.56	0.154076	0.856619	1.55243	0.00393648
8868	Tb427-110128100	0.00111136	0.019802	0.000757259	0.930161	3.91538	FALSE	3818.21	0.148963	0.857994	1.57026	0.00393648
7470	Tb427-100144100	0.00214216	0.00990099	0.00075796	0.84383	3.40661	FALSE	6172.46	0.319293	0.715529	1.52255	0.00393717
860	Tb427-000730800	8.6166e-05	0.00990099	0.000764031	0.719386	1.00695	FALSE	3524.85	0.131287	0.87792	1.75017	0.00396583
9075	Tb427-110149700	0.0138518	0.00990099	0.000764295	0.853129	4.10213	FALSE	5749.5	0.283963	0.740953	1.55543	0.00396583
3409	Tb427-060018900	9.21745e-05	0.00990099	0.000769211	0.00679056	3.63405	FALSE	3093.29	0.109006	0.898076	2.82512	0.0039892
8017	Tb427-110034700	0.000857607	0.00990099	0.000784515	0.0958762	3.68787	FALSE	3088.88	0.109574	0.893266	2.08219	0.0040664
7510	Tb427-100148500	0.0027567	0.00990099	0.000789989	0.591892	3.61046	FALSE	5010.61	0.225655	0.792029	1.8603	0.00409258
2091	Tb427-030037200	0.00148966	0.00990099	0.000794493	0.329694	4.63498	FALSE	2162.89	0.0664923	0.935639	2.07226	0.00411154
8194	Tb427-110052900	0.00296409	0.00990099	0.000794496	0.837969	4.42299	FALSE	4329.79	0.179348	0.833028	2.13322	0.00411154
1935	Tb427-030018800	0.015946	0.00990099	0.000796209	0.85186	3.40791	FALSE	2923.03	0.100714	0.903115	1.70818	0.00411558
4886	Tb427-080045300	0.00331653	0.00990099	0.00079655	0.830961	3.70353	FALSE	3521.39	0.13193	0.873568	1.72582	0.00411558
7268	Tb427-100123400	0.000508246	0.00990099	0.00079624	0.936681	1.00016	FALSE	4789.16	0.211365	0.801191	1.4617	0.00411558
4347	Tb427-070067900	0.000133667	0.00990099	0.000797132	0.353128	1.00055	FALSE	5167.76	0.236024	0.786761	1.4841	0.00411639
4570	Tb427-080011000	0.000923362	0.00990099	0.00080059	0.593021	2.19259	FALSE	3195.52	0.114559	0.890289	1.74903	0.00413205
5152	Tb427-080072700	0.00273187	0.00990099	0.000806562	0.274405	4.0328	FALSE	4342.26	0.179899	0.83257	1.5922	0.00416066
8948	Tb427-110136400	0.00388361	0.00990099	0.000810823	0.993253	4.21049	FALSE	1997.02	0.0598062	0.940907	3.03012	0.00418042
7573	Tb427-100154800	0.000238556	0.00990099	0.00081301	0.681647	2.91368	FALSE	2059.02	0.0624712	0.938846	2.63856	0.00418946
1958	Tb427-030021100	0.00282934	0.00990099	0.000817232	0.898256	3.14944	FALSE	4746.27	0.207506	0.806917	1.50095	0.00420898
5031	Tb427-080060500	0.00102207	0.00990099	0.000820295	0.754793	3.74318	FALSE	2619.81	0.0867526	0.915941	3.76889	0.00422252
2014	Tb427-030028000	0.00130655	0.00990099	0.000821413	0.953514	2.80892	FALSE	3910.2	0.15404	0.853413	1.61811	0.00422603
6043	Tb427-090083600	3.21764e-05	0.00990099	0.000829169	0.237311	1.00028	FALSE	3353.31	0.122903	0.883188	1.82125	0.00426367
2041	Tb427-030030700	0.0108929	0.00990099	0.000830411	0.0652633	4.67737	FALSE	2514	0.081457	0.922126	2.85131	0.00426553
3113	Tb427-050035200	0.00445271	0.00990099	0.000830235	0.507176	3.85139	FALSE	1616.36	0.045131	0.955566	2.32029	0.00426553
5125	Tb427-080069900	0.000258423	0.00990099	0.000831789	0.465126	3.36605	FALSE	3253.34	0.117393	0.889372	2.1876	0.00427035
6033	Tb427-090082600	0.000272755	0.00990099	0.000836286	0.569917	2.84692	FALSE	4227.16	0.174105	0.834402	1.63888	0.00429116
5716	Tb427-090048400	0.000298291	0.00990099	0.000841882	0.00385054	3.00038	FALSE	2461.25	0.0796065	0.922355	2.06532	0.0043176
8211	Tb427-110054600	0.000401173	0.00990099	0.000842382	0.64695	2.83873	FALSE	4569.69	0.196698	0.813101	1.58811	0.00431788
4458	Tb427-070079900	0.000780717	0.00990099	0.000843611	0.662435	4.45578	FALSE	2947.01	0.102003	0.902428	2.55461	0.00432189
287	Tb427-000277900	0.000950247	0.00990099	0.000854794	0.287302	2.5323	FALSE	2264.73	0.0710992	0.928997	2.06711	0.00437687
7359	Tb427-100132500	0.00197224	0.00990099	0.000857357	0.757491	3.19145	FALSE	4835.98	0.213912	0.800046	1.72918	0.00438768
9203	Tb427-110162500	0.00266804	0.00990099	0.000862389	0.654211	4.33065	FALSE	5703.73	0.279323	0.748053	1.86114	0.00440878
8653	Tb427-110099900	0.00247348	0.00990099	0.000862375	0.0227611	2.53727	FALSE	6690.52	0.367494	0.67934	1.33315	0.00440878
2001	Tb427-030026700	0.00135907	0.00990099	0.000862922	0.800991	3.71088	FALSE	4609.36	0.197414	0.818598	1.99032	0.00440917
1290	Tb427-010007000	0.000718314	0.00990099	0.000869398	0.985374	3.45036	FALSE	4949.68	0.223234	0.789739	1.38486	0.00443993
5586	Tb427-090034900	0.00394201	0.00990099	0.000874081	0.24274	4.00566	FALSE	3191.38	0.114438	0.888914	1.67567	0.0044615
9485	ND1	0.00554301	0.00990099	0.000875835	0.613634	3.45134	FALSE	6714.75	0.369984	0.676821	1.36152	0.00446809
5241	Tb427-080081600	0.0258965	0.00990099	0.000877463	0.325744	4.40364	FALSE	7252.92	0.424767	0.638113	1.27822	0.00447405
6600	Tb427-100052700	0.000757486	0.00990099	0.000881215	0.24707	3.32535	FALSE	2794.49	0.0945945	0.909528	2.23689	0.00449082
3149	Tb427-050038800	0.0030601	0.00990099	0.000881781	0.68326	3.97174	FALSE	6564.68	0.353634	0.692854	1.33247	0.00449134
106	Tb427-000107300:pseudogene	0.00660564	0.00990099	0.000891443	0.369065	4.08983	FALSE	3258.59	0.117541	0.887998	2.30295	0.00453579
6141	Tb427-100005700	0.0360423	0.00990099	0.000891238	0.665186	3.30625	FALSE	3291.6	0.119364	0.88525	1.88888	0.00453579
8773	Tb427-110118600	0.00658048	0.00990099	0.000893055	0.109389	3.19164	FALSE	6166	0.316921	0.720339	1.48777	0.00454161
2072	Tb427-030033800	0.0011441	0.00990099	0.000895019	0.711105	1.00026	FALSE	8145.56	0.534317	0.561154	1.24977	0.00454774
2782	Tb427-040053100	0.0019254	0.00990099	0.000895198	0.362559	3.70227	FALSE	2291.79	0.0718192	0.931745	2.52065	0.00454774
7559	Tb427-100153400	0.00550115	0.00990099	0.000901544	0.235601	3.62794	FALSE	5409.95	0.256512	0.764086	1.56897	0.00457758
9084	Tb427-110150600	0.0201137	0.00990099	0.000910601	0.664381	3.04349	FALSE	7389.92	0.436533	0.634219	1.37738	0.00461873
1864	Tb427-030011700	0.0021608	0.00990099	0.00091059	0.406467	3.24203	FALSE	4419.71	0.185576	0.825928	1.70001	0.00461873
5502	Tb427-090026400	0.00288626	0.00990099	0.000913841	0.858901	3.24477	FALSE	3639.3	0.138286	0.869217	1.72232	0.00463032
8213	Tb427-110054800	0.00237029	0.00990099	0.000913619	0.703995	3.9562	FALSE	2949.08	0.102485	0.899908	2.18412	0.00463032
2080	Tb427-030034600	0.00436559	0.00990099	0.000917947	0.890572	2.96881	FALSE	3152.53	0.112689	0.89006	1.63759	0.0046487
2740	Tb427-040048900	0.00246146	0.00990099	0.000929121	0.0215739	1.00115	FALSE	7704.59	0.484142	0.58612	1.24488	0.00470283
2222	Tb427-030051000	0.00442258	0.00990099	0.000931429	0.330061	3.67178	FALSE	5697.15	0.279432	0.745305	1.66007	0.00471205
4875	Tb427-080044200	0.00633039	0.00990099	0.000932199	0.123601	3.2532	FALSE	1253.03	0.0324074	0.968621	3.20852	0.00471349
2162	Tb427-030044500	0.0100525	0.00990099	0.000937468	0.74995	3.44738	FALSE	5097.85	0.231086	0.788823	1.41565	0.00473766
3479	Tb427-060028600	0.00302899	0.00990099	0.000938724	0.717111	3.49819	FALSE	3777.21	0.146669	0.859597	1.55545	0.00474154
2015	Tb427-030028100	0.00155324	0.019802	0.000940419	0.794395	3.64154	FALSE	2542.39	0.082947	0.920293	2.27796	0.00474646
4308	Tb427-070063800	6.7499e-06	0.00990099	0.000940678	0.928329	1.00014	FALSE	5341.49	0.250635	0.770728	1.57636	0.00474646
4295	Tb427-070062500	0.000145482	0.00990099	0.000943851	0.755348	3.45139	FALSE	3075.29	0.108153	0.898992	2.86565	0.00475752
5242	Tb427-080081700	0.000787458	0.00990099	0.000943716	0.874893	4.25416	FALSE	4053.78	0.163918	0.841273	1.63744	0.00475752
3994	Tb427-070030600	0.00112427	0.00990099	0.000945758	0.373533	2.58614	FALSE	2471.6	0.0801394	0.92098	1.90669	0.00476465
4589	Tb427-080012900	0.00110696	0.00990099	0.000948755	0.190977	3.43324	FALSE	3564.51	0.134736	0.87082	2.22941	0.00477727
2786	Tb427-040053500	0.119636	0.019802	0.000953187	0.344966	2.03518	FALSE	12036.2	1.55997	0.136509	1.06766	0.0047971
9107	Tb427-110152900	0.00307632	0.00990099	0.000964139	0.604069	2.89166	FALSE	8376.66	0.570299	0.534356	1.30911	0.00484766
529	Tb427-000578600:pseudogene	0.00247301	0.00990099	0.000964631	0.444912	3.24809	FALSE	586.867	0.0127384	0.986716	6.14635	0.00484766
2129	Tb427-030041000	0.00314204	0.00990099	0.000964733	0.806202	3.78423	FALSE	3772.22	0.146215	0.860055	2.10612	0.00484766
7155	Tb427-100110400	0.000247093	0.00990099	0.000968326	0.182424	1.00014	FALSE	2692.83	0.0900147	0.912506	1.85341	0.00486319
9272	Tb427-110169400	0.000545772	0.00990099	0.000996265	0.322456	3.60854	FALSE	769.952	0.0177687	0.981906	7.9674	0.00499833
7154	Tb427-100110300	0.0010857	0.00990099	0.000995973	0.49874	4.35969	FALSE	2778.11	0.0942997	0.907925	2.69463	0.00499833
8600	Tb427-110093600	0.00769818	0.00990099	0.000997336	0.964541	3.4466	FALSE	5739.44	0.28206	0.745076	1.50123	0.00500112
4863	Tb427-080043000	0.00154285	0.00990099	0.00100271	0.854866	3.41193	FALSE	4480.66	0.18914	0.824324	1.76885	0.00502547
5599	Tb427-090036200	0.00221866	0.00990099	0.00100948	0.79161	2.79069	FALSE	6463.14	0.34769	0.690334	1.35496	0.00505679
2363	Tb427-040010000	0.00150508	0.00990099	0.00102139	0.048262	3.48925	FALSE	4485.6	0.189337	0.824553	1.88459	0.00511382
7590	Tb427-100156500	0.0131017	0.00990099	0.00102506	0.69054	4.77945	FALSE	4483.49	0.18969	0.822492	2.2401	0.00512954
1383	Tb427-010016400	0.00149513	0.00990099	0.00103088	0.912632	3.96294	FALSE	3912.4	0.153445	0.857765	1.69838	0.00515598
6236	Tb427-100015300	0.00059804	0.00990099	0.00103251	0.194436	3.76528	FALSE	4156.78	0.168954	0.841503	1.99302	0.00516151
1599	Tb427-020012900	7.71614e-05	0.00990099	0.00104381	0.79287	1.00051	FALSE	2885.61	0.0995964	0.902199	1.88318	0.00521527
4033	Tb427-070036300	0.000380726	0.00990099	0.00104572	0.684785	3.90338	FALSE	4353.78	0.180349	0.834173	1.89777	0.00522215
6546	Tb427-100047200	5.72522e-05	0.00990099	0.00104813	0.184854	1.0004	FALSE	2418.17	0.0777968	0.9235	2.07899	0.0052315
91	Tb427-000073700:pseudogene	0.0140026	0.00990099	0.00105102	0.404138	4.33157	FALSE	9308.54	0.699976	0.471141	1.31141	0.0052432
1889	Tb427-030014200	0.00672439	0.019802	0.00106706	0.381722	3.27505	FALSE	4751.71	0.206201	0.812414	1.64077	0.00531776
8322	Tb427-110065700	0.000296421	0.00990099	0.00106663	0.266181	1.69626	FALSE	3062.62	0.107512	0.898534	1.84386	0.00531776
7554	Tb427-100152900	5.071e-05	0.00990099	0.00107135	0.63361	1.00012	FALSE	4230.05	0.172921	0.839441	1.6334	0.00533639
4398	Tb427-070073100	0.0135773	0.00990099	0.00107598	0.690669	4.04649	FALSE	6340.28	0.335097	0.701099	1.73649	0.00535397
7097	Tb427-100104600	0.0175241	0.00990099	0.00107588	0.993979	3.76375	FALSE	3208.46	0.114844	0.890289	1.49121	0.00535397
7553	Tb427-100152800	0.00360339	0.00990099	0.00107669	0.646939	4.00297	FALSE	1729.2	0.0495032	0.950069	2.25661	0.00535476
6220	Tb427-100013700	0.00103555	0.00990099	0.00108218	0.317317	4.59557	FALSE	2370.21	0.0756751	0.92579	2.37257	0.00537928
7377	Tb427-100134400	0.00189696	0.00990099	0.00109061	0.733863	1.5911	FALSE	8210.01	0.545574	0.551077	1.27709	0.00541843
7946	Tb427-110027600	8.71602e-05	0.00990099	0.00109486	0.344216	1.00014	FALSE	5205.74	0.241528	0.77508	1.49321	0.00543673
8354	Tb427-110068900	0.000127058	0.00990099	0.00109628	0.887141	1.00031	FALSE	7561.35	0.46147	0.612002	1.32893	0.005441
3028	Tb427-050026300	0.00186133	0.00990099	0.00109782	0.872891	2.10602	FALSE	8448.31	0.572339	0.542144	1.25048	0.00544585
1524	Tb427-010033100	0.0061571	0.00990099	0.00111388	0.0685664	1.70916	FALSE	244.769	0.00446941	0.995419	16.285	0.00552269
425	Tb427-000484600	0.00477789	0.00990099	0.00111491	0.739176	3.63893	FALSE	1884.71	0.0552335	0.945946	3.23325	0.005525
3872	Tb427-070017600	0.0102321	0.00990099	0.00112266	0.104077	3.95715	FALSE	2903.91	0.0999544	0.902886	2.03714	0.00556055
1382	Tb427-010016300	0.0163978	0.00990099	0.0011274	0.282346	4.74822	FALSE	6869.74	0.37836	0.682547	1.57614	0.00558119
5791	Tb427-090055900	0.0118893	0.00990099	0.00113757	0.873549	3.45788	FALSE	6930.5	0.393935	0.655062	1.47645	0.00562865
6623	Tb427-100055000	0.000421964	0.00990099	0.00114012	0.533398	2.42618	FALSE	5239.08	0.242209	0.779203	1.47211	0.00563838
6939	Tb427-100088200	0.000602942	0.00990099	0.00114506	0.710699	3.73996	FALSE	3805.1	0.148612	0.857536	2.08681	0.00565993
2434	Tb427-040017100	0.00012659	0.00990099	0.00114844	0.844526	1.00028	FALSE	4186.43	0.171352	0.836922	1.59306	0.00567333
8520	Tb427-110085500	0.00282921	0.00990099	0.00114894	0.510634	2.99614	FALSE	2136.68	0.0653466	0.936784	2.21795	0.00567333
7126	Tb427-100107500	0.00242669	0.00990099	0.0011543	0.819374	2.7243	FALSE	2489.27	0.0807701	0.92098	1.89255	0.00569691
6771	Tb427-100070100	0.0014084	0.019802	0.00116572	0.992096	4.49558	FALSE	2844.23	0.0971383	0.906322	1.98441	0.00575035
3797	Tb427-070009900	0.00276201	0.00990099	0.00116722	0.500069	3.12795	FALSE	3684.94	0.141262	0.864407	1.53172	0.0057548
6246	Tb427-100016300:pseudogene	0.00167149	0.00990099	0.00117341	0.253722	2.5123	FALSE	4543.09	0.193902	0.817682	1.56419	0.00578237
677	Tb427-000668200	0.0464404	0.00990099	0.0011772	0.333314	3.6989	FALSE	11956.5	1.3998	0.191709	1.23798	0.0057981
3856	Tb427-070015900	0.00282529	0.00990099	0.00118326	0.888364	3.44572	FALSE	5135.14	0.235495	0.78241	1.54862	0.005825
861	Tb427-000731800	0.00988791	0.00990099	0.00119809	0.0302742	3.30263	FALSE	6916.48	0.387867	0.666972	1.43996	0.00589502
1978	Tb427-030023100:pseudogene	0.00649855	0.00990099	0.00120486	0.381771	3.44366	FALSE	1789.63	0.0515424	0.949382	1.78919	0.00592533
4550	Tb427-080009000	0.0172115	0.00990099	0.00120589	0.0948863	4.73296	FALSE	5545.72	0.265447	0.760421	1.51265	0.00592739
2487	Tb427-040022400	0.010985	0.00990099	0.00121054	0.856845	3.36026	FALSE	3346.34	0.121702	0.885479	2.04925	0.00594723
2386	Tb427-040012300	0.000224659	0.00990099	0.00121224	0.689938	3.8893	FALSE	1212.08	0.0314324	0.968163	2.85281	0.00595254
8105	Tb427-110043800	0.00081455	0.00990099	0.00122191	0.826396	3.50781	FALSE	2890.9	0.0991473	0.905863	2.46667	0.00599702
6352	Tb427-100027300	0.00675238	0.00990099	0.00122663	0.4515	4.25102	FALSE	2043.05	0.0614647	0.940449	2.63819	0.00601711
4613	Tb427-080017400	0.00674071	0.00990099	0.00122793	0.138062	3.43033	FALSE	3639.32	0.138478	0.867384	1.91241	0.00602044
3369	Tb427-060014900	0.000704183	0.00990099	0.00122868	0.365331	4.07706	FALSE	2204.47	0.0683303	0.933349	2.18901	0.00602108
5981	Tb427-090077400	0.00256455	0.00990099	0.00123075	0.995519	3.78784	FALSE	1852.89	0.0539648	0.948694	2.26434	0.00602819
7147	Tb427-100109600	6.75406e-05	0.00990099	0.00124185	0.284403	2.73663	FALSE	4665.98	0.202721	0.810124	1.51184	0.00607947
8903	Tb427-110131900	0.00353942	0.00990099	0.00124953	0.525055	3.61873	FALSE	3487.05	0.129773	0.876775	1.65437	0.00611398
2856	Tb427-050008400	0.00198659	0.00990099	0.00126212	0.803241	3.20203	FALSE	4041.74	0.161419	0.849061	1.67943	0.00617248
4339	Tb427-070067100	0.00202634	0.00990099	0.00126415	0.759854	2.38091	FALSE	2801.81	0.0949301	0.908383	1.80651	0.00617928
8388	Tb427-110072300	0.00642042	0.00990099	0.00126684	0.166178	4.15887	FALSE	5031.26	0.225021	0.797984	1.83973	0.00618935
3600	Tb427-060040700	0.00263351	0.00990099	0.00127469	0.0396799	3.82078	FALSE	2473.37	0.0798034	0.923042	2.39846	0.00622238
8898	Tb427-110131400	0.00241897	0.00990099	0.00127489	0.848232	2.36007	FALSE	5660.17	0.275223	0.750802	1.41854	0.00622238
273	Tb427-000276400	0.000128069	0.00990099	0.00127714	0.823751	1.00193	FALSE	2776.96	0.0935226	0.911819	1.90554	0.00623025
2834	Tb427-050006200	0.000865484	0.00990099	0.0012802	0.0768193	3.51029	FALSE	3674	0.139405	0.871278	2.03685	0.00624204
7146	Tb427-100109500	0.048827	0.00990099	0.00129321	0.482792	3.63448	FALSE	8516.42	0.59419	0.513514	1.33642	0.00630226
8132	Tb427-110046500	0.00688946	0.00990099	0.00130643	0.463208	4.08286	FALSE	5083.54	0.23227	0.782639	1.87551	0.00636349
350	Tb427-000347900	0.00104929	0.00990099	0.00131789	0.764016	3.25403	FALSE	1201.02	0.0308408	0.970454	4.80146	0.00641611
5864	Tb427-090063600	0.0182724	0.00990099	0.00132188	0.513142	4.05827	FALSE	5489.52	0.261866	0.76065	1.45729	0.00643229
3809	Tb427-070011100	5.61578e-05	0.00990099	0.00132982	0.176173	1.00209	FALSE	3299.21	0.120227	0.884792	1.79817	0.00646768
9010	Tb427-110142700	0.00192633	0.00990099	0.00133725	0.581308	3.37916	FALSE	4466.03	0.188941	0.822034	1.90452	0.00650056
2627	Tb427-040036800	0.00306037	0.00990099	0.00133916	0.907401	2.42364	FALSE	3748.67	0.144367	0.863262	1.62705	0.00650659
[truncated: 7,708 more rows]

## Sheet: BSF DE (p < 0.01, FC > 1.5)
DE analysis for only CCR genes (FC > 1.5, adjusted p=value < 0.01)
Crozier and Benz CCR colums indicte is proteins for a CCR gene were CCR (TRUE), undetected, or detected but not CCR (FALSE) in each study.
order	gene	fix.pv	emp.pv	para.pv	ad.pv	rank	zinf	aic	expv.mean	expv.zero	meanlogFC	BHadjust.pvalue	peak phase						Gene	peak phase
2477	Tb427-040021400	0	0.00990099	2.09488e-41	0.692456	4.96262	FALSE	7501.13	0.468265	0.61956	3.42363	1.52753e-39	Early G1						Tb427-000008600:pseudogene	Late G1
1967	Tb427-030022000	0	0.00990099	1.13653e-32	0.837588	3.64337	FALSE	10288.6	0.937559	0.343793	1.61903	5.92587e-31	Early G1						Tb427-000014200	S
6859	Tb427-100080100	0	0.00990099	1.50114e-26	0.00716369	4.86218	FALSE	8005.76	0.526923	0.568942	1.6757	5.98627e-25	Early G1						Tb427-000014300:pseudogene	G2M
3617	Tb427-060042400	0	0.00990099	2.08622e-25	0.964087	4.48774	FALSE	8732.03	0.638378	0.50229	1.88719	7.87245e-24	Early G1						Tb427-000014500:pseudogene	S
43	Tb427-000015300	0	0.00990099	6.52133e-23	0.613269	4.63324	FALSE	8463.84	0.568671	0.56459	1.88773	2.18837e-21	Early G1						Tb427-000014700	G2M
2107	Tb427-030038800	0	0.00990099	9.57722e-22	0.886075	3.74047	FALSE	2903.04	0.104964	0.905405	4.44631	3.0254e-20	Early G1						Tb427-000015100	G2M
6665	Tb427-100059200	0	0.00990099	1.24964e-18	0.328799	4.82353	FALSE	5118.09	0.23595	0.785158	2.22774	3.28428e-17	Early G1						Tb427-000015200:pseudogene	G2M
7025	Tb427-100097400	0	0.00990099	4.03979e-16	0.732872	4.63748	FALSE	8119.94	0.534346	0.5694	1.74274	8.88387e-15	Early G1						Tb427-000015300	Early G1
3357	Tb427-060013500	0	0.00990099	7.50664e-14	0.158895	4.32688	FALSE	9660.46	0.789165	0.409299	1.55108	1.41084e-12	Early G1						Tb427-000015400	S
5122	Tb427-080069600	3.47171e-05	0.00990099	7.8256e-13	0.556145	3.89022	FALSE	4332.05	0.180237	0.831883	1.61251	1.37487e-11	Early G1						Tb427-000015500	G2M
4203	Tb427-070053300	0	0.00990099	8.4238e-13	0.161273	4.15066	FALSE	7618.87	0.471943	0.606734	1.59243	1.47729e-11	Early G1						Tb427-000015600:pseudogene	G2M
2779	Tb427-040052800	0	0.00990099	5.66411e-11	0.365249	4.60844	FALSE	5165.97	0.236791	0.792029	2.13126	8.39916e-10	Early G1						Tb427-000107300:pseudogene	Late G1
9074	Tb427-110149600	0.000371362	0.00990099	7.39936e-11	0.649666	4.86876	FALSE	6423.18	0.341652	0.700412	1.85323	1.07424e-09	Early G1						Tb427-000108500	Late G1
6803	Tb427-100073300	0	0.00990099	7.48766e-11	0.43419	4.74065	FALSE	7883.24	0.502402	0.584746	1.52885	1.08543e-09	Early G1						Tb427-000109000	Late G1
4439	Tb427-070078000	0	0.00990099	8.8091e-11	0.131009	4.66976	FALSE	6417.87	0.340988	0.708429	1.7932	1.26752e-09	Early G1						Tb427-000110300	G2M
9434	Tb427-110185900	0	0.00990099	1.19839e-10	0.922022	3.96687	FALSE	7882.09	0.500338	0.58841	1.83109	1.7041e-09	Early G1						Tb427-000175100	S
3356	Tb427-060013300	0	0.00990099	7.54149e-10	0.628773	3.85927	FALSE	5604.54	0.272101	0.757902	2.12175	9.91769e-09	Early G1						Tb427-000198100:pseudogene	S
6358	Tb427-100027900	0	0.00990099	8.03866e-10	0.316123	4.12681	FALSE	7231.13	0.425302	0.642235	1.76123	1.05208e-08	Early G1						Tb427-000270000:pseudogene	Late G1
6045	Tb427-090083800	0	0.00990099	1.44848e-09	0.972954	4.27654	FALSE	4768.98	0.21031	0.80852	2.07017	1.83386e-08	Early G1						Tb427-000272300:pseudogene	S
7066	Tb427-100101500	0	0.00990099	2.29319e-09	0.843733	4.71564	FALSE	7352.21	0.437028	0.63399	1.54357	2.84028e-08	Early G1						Tb427-000272800:pseudogene	S
7821	Tb427-110014900	3.46788e-06	0.00990099	9.19662e-08	0.863692	3.96673	FALSE	7573.1	0.464896	0.607879	1.60007	9.56961e-07	Early G1						Tb427-000274500:pseudogene	Late G1
5163	Tb427-080073800	1.47795e-05	0.00990099	1.13792e-07	0.0623304	4.56671	FALSE	6906.26	0.389268	0.665369	1.58954	1.17026e-06	Early G1						Tb427-000276300	S
6357	Tb427-100027800:pseudogene	5.20429e-06	0.00990099	2.32194e-07	0.213633	4.86067	FALSE	6375.91	0.334905	0.711864	1.70839	2.29076e-06	Early G1						Tb427-000276400	S
7143	Tb427-100109200	6.04531e-07	0.00990099	3.27098e-07	0.940651	4.72193	FALSE	3334.2	0.121807	0.892579	2.59588	3.16271e-06	Early G1						Tb427-000277900	S
6754	Tb427-100068400:pseudogene	4.90475e-07	0.00990099	3.40138e-07	0.989414	3.52959	FALSE	3551.8	0.134697	0.872423	2.3015	3.27899e-06	Early G1						Tb427-000286400	Late G1
8905	Tb427-110132100	0	0.00990099	5.98779e-07	0.301919	4.08961	FALSE	2597.13	0.0867332	0.917316	2.52048	5.50179e-06	Early G1						Tb427-000311000:pseudogene	S
2990	Tb427-050022300	2.88155e-05	0.00990099	6.39212e-07	0.692494	4.60518	FALSE	5889.15	0.293737	0.740037	2.01071	5.83717e-06	Early G1						Tb427-000347900	G2M
1452	Tb427-010024700	0	0.00990099	1.95257e-06	0.0543022	4.6838	FALSE	5674.38	0.276636	0.755612	3.04142	1.6596e-05	Early G1						Tb427-000481200:pseudogene	S
6255	Tb427-100017200:pseudogene	1.57717e-05	0.00990099	3.90598e-06	0.780943	3.66085	FALSE	5407.24	0.256303	0.766835	1.60947	3.15143e-05	Early G1						Tb427-000481600:pseudogene	Late G1
6651	Tb427-100057800	0.00224065	0.00990099	4.50063e-06	0.637908	4.78323	FALSE	5093.93	0.230223	0.792716	1.74228	3.59532e-05	Early G1						Tb427-000484600	Late G1
2198	Tb427-030048400	4.22099e-05	0.00990099	5.84167e-06	0.185794	4.28636	FALSE	5941.04	0.296364	0.740495	2.0397	4.59842e-05	Early G1						Tb427-000497700	Late G1
3138	Tb427-050037700	6.97942e-05	0.00990099	9.18088e-06	0.155764	4.61938	FALSE	6764.14	0.373062	0.680486	1.68044	7.02732e-05	Early G1						Tb427-000578400:pseudogene	S
5583	Tb427-090034600	1.87842e-05	0.00990099	1.05523e-05	0.396442	4.65635	FALSE	4402.36	0.184818	0.828218	1.92048	7.95773e-05	Early G1						Tb427-000578500:pseudogene	S
4858	Tb427-080042500	3.13043e-05	0.00990099	1.31339e-05	0.981628	4.58888	FALSE	5601.9	0.271541	0.754466	1.55773	9.74545e-05	Early G1						Tb427-000578600:pseudogene	S
7645	Tb427-100162700	2.73959e-06	0.00990099	1.87537e-05	0.764079	3.17573	FALSE	6417.2	0.339227	0.706596	1.63224	0.000135625	Early G1		Tb427-080009800				Tb427-000636500:pseudogene	Late G1
2953	Tb427-050018300	4.73591e-05	0.00990099	2.0496e-05	0.066741	4.21672	FALSE	2796	0.0951822	0.908383	1.99184	0.000147456	Early G1						Tb427-000669000	Late G1
8131	Tb427-110046400:pseudogene	4.75003e-05	0.00990099	2.48056e-05	0.82166	3.22711	FALSE	1093.02	0.0276305	0.97366	5.55389	0.000175339	Early G1						Tb427-000669200:pseudogene	S
4082	Tb427-070041200	8.05406e-05	0.00990099	2.57148e-05	0.0962288	4.37202	FALSE	3932.25	0.155022	0.855932	1.71456	0.000181501	Early G1						Tb427-000677400	G2M
8100	Tb427-110043300	2.21091e-05	0.00990099	3.21195e-05	0.507429	3.74741	FALSE	6379.89	0.334802	0.712093	1.60066	0.000221389	Early G1						Tb427-000677800:pseudogene	Early G1
6927	Tb427-100087000	4.22364e-05	0.00990099	3.40661e-05	0.0932369	3.5647	FALSE	5931.67	0.298049	0.734082	1.60126	0.000233644	Early G1						Tb427-000730800	Late G1
4818	Tb427-080038400	2.85311e-05	0.00990099	3.66687e-05	0.881035	4.2627	FALSE	2905.64	0.10034	0.904718	3.03068	0.000250785	Early G1						Tb427-000736100	Late G1
8515	Tb427-110085000	2.03583e-05	0.00990099	6.42986e-05	0.825643	4.42279	FALSE	2643.06	0.0880632	0.915254	2.17759	0.000422472	Early G1						Tb427-000747600	G2M
7694	Tb427-100168800	5.04453e-06	0.00990099	7.82353e-05	0.909267	3.89412	FALSE	4233.5	0.173413	0.840586	2.12358	0.000503802	Early G1						Tb427-000757800	S
7206	Tb427-100116700	0.00107921	0.00990099	0.000124689	0.999491	4.75246	FALSE	6347.71	0.336312	0.701099	1.5544	0.000771192	Early G1						Tb427-000781200:pseudogene	Late G1
3764	Tb427-070006600	0.000196454	0.00990099	0.000134798	0.208059	3.00578	FALSE	3917.56	0.154088	0.855932	1.55971	0.000827385	Early G1						Tb427-000792500	S
1830	Tb427-030008300	0.000281084	0.00990099	0.000135063	0.719462	2.75548	FALSE	4895.43	0.217411	0.800504	1.55741	0.000828486	Early G1						Tb427-000806900	G2M
4824	Tb427-080039000	0.0146015	0.00990099	0.000136013	0.529211	4.42287	FALSE	4000.68	0.159098	0.849519	1.59245	0.000832208	Early G1						Tb427-000808800:pseudogene	Late G1
7360	Tb427-100132600	1.15274e-05	0.00990099	0.000180666	0.218101	3.51969	FALSE	4050.43	0.161836	0.851351	1.95295	0.00107755	Early G1						Tb427-010005600	S
5006	Tb427-080058000	2.25321e-05	0.00990099	0.000198078	0.668832	2.29465	FALSE	3873.72	0.151759	0.858452	1.65416	0.00116776	Early G1						Tb427-010005900	Late G1
3753	Tb427-070005500	0.00053861	0.00990099	0.000265402	0.471346	2.93454	FALSE	5146.37	0.23655	0.781722	1.53307	0.00153207	Early G1						Tb427-010006000	S
3942	Tb427-070025400	0.000595415	0.00990099	0.000314828	0.957645	3.12811	FALSE	6011.86	0.303532	0.731562	1.6975	0.00179494	Early G1						Tb427-010006400	S
2855	Tb427-050008300	3.42425e-05	0.00990099	0.000323504	0.295222	1.00295	FALSE	2694.5	0.0899018	0.914338	2.05408	0.00183685	Early G1						Tb427-010006500	Late G1
4877	Tb427-080044400	0.0176	0.00990099	0.000331407	0.178926	4.77224	FALSE	2561.13	0.0835856	0.919606	2.23952	0.00187623	Early G1						Tb427-010007200	G2M
8241	Tb427-110057600	0.000310635	0.00990099	0.000398087	0.421195	3.80026	FALSE	2689.86	0.08997	0.913422	1.94113	0.00221257	Early G1						Tb427-010008300	S
7358	Tb427-100132400	0.00106929	0.00990099	0.000480743	0.421499	3.41195	FALSE	5409.33	0.25457	0.770499	1.70882	0.0026281	Early G1						Tb427-010009400	Late G1
8743	Tb427-110109100	0.000792508	0.00990099	0.000540435	0.429243	1.76782	FALSE	3880.89	0.151611	0.859139	1.61676	0.00291336	Early G1						Tb427-010010700	S
712	Tb427-000677800:pseudogene	0.0226726	0.00990099	0.000578517	0.923816	4.85621	FALSE	251.22	0.00467169	0.995648	27.1819	0.00309286	Early G1						Tb427-010010800	Early G1
5712	Tb427-090048000	0.00261366	0.00990099	0.000653723	0.155127	3.48668	FALSE	4668.37	0.200865	0.81585	1.78617	0.00344742	Early G1						Tb427-010011200	S
5614	Tb427-090037700	0.00334346	0.00990099	0.000665941	0.957417	2.95998	FALSE	2447.26	0.0783673	0.927623	1.59934	0.00350423	Early G1						Tb427-010011400	S
5315	Tb427-090005500	0.000268151	0.019802	0.000732621	0.0381658	1.00224	FALSE	2036.77	0.0612638	0.941365	2.16464	0.00383017	Early G1						Tb427-010011800	G2M
7658	Tb427-100164000	0.00245366	0.00990099	0.00073242	0.783183	3.86486	FALSE	3752.46	0.14479	0.863033	1.56241	0.00383017	Early G1						Tb427-010012500	Late G1
2839	Tb427-050006700	0.00129012	0.00990099	0.000737543	0.159201	4.59203	FALSE	5186.01	0.239191	0.77989	1.81749	0.00385005	Early G1						Tb427-010013900	G2M
2782	Tb427-040053100	0.0019254	0.00990099	0.000895198	0.362559	3.70227	FALSE	2291.79	0.0718192	0.931745	2.52065	0.00454774	Early G1						Tb427-010014400	G2M
8600	Tb427-110093600	0.00769818	0.00990099	0.000997336	0.964541	3.4466	FALSE	5739.44	0.28206	0.745076	1.50123	0.00500112	Early G1						Tb427-010014800	S
7590	Tb427-100156500	0.0131017	0.00990099	0.00102506	0.69054	4.77945	FALSE	4483.49	0.18969	0.822492	2.2401	0.00512954	Early G1						Tb427-010015000	Late G1
6236	Tb427-100015300	0.00059804	0.00990099	0.00103251	0.194436	3.76528	FALSE	4156.78	0.168954	0.841503	1.99302	0.00516151	Early G1						Tb427-010015200	Late G1
4398	Tb427-070073100	0.0135773	0.00990099	0.00107598	0.690669	4.04649	FALSE	6340.28	0.335097	0.701099	1.73649	0.00535397	Early G1						Tb427-010015900	S
1382	Tb427-010016300	0.0163978	0.00990099	0.0011274	0.282346	4.74822	FALSE	6869.74	0.37836	0.682547	1.57614	0.00558119	Early G1						Tb427-010016100	S
7546	Tb427-100152100	0.00356436	0.00990099	0.00138257	0.428853	3.25803	FALSE	4040.07	0.161998	0.845854	1.77053	0.00667405	Early G1						Tb427-010016300	Early G1
2778	Tb427-040052700	0.162569	0.00990099	0.00142529	0.462291	4.61846	FALSE	4943.13	0.220639	0.795465	1.61216	0.00686661	Early G1						Tb427-010016400	G2M
2798	Tb427-040054700	0.00539878	0.00990099	0.00145712	0.319532	4.63674	FALSE	1701.18	0.0482471	0.953962	4.25035	0.00700255	Early G1						Tb427-010016500:pseudogene	G2M
2829	Tb427-050005700	0.00622157	0.00990099	0.00164839	0.982467	3.4233	FALSE	4296.94	0.177135	0.835547	1.95504	0.00778289	Early G1						Tb427-010016700	Late G1
8788	Tb427-110120100	0.00203273	0.00990099	0.00164774	0.500187	3.62818	FALSE	3241.33	0.1167	0.888914	1.87599	0.00778289	Early G1						Tb427-010016800	S
1328	Tb427-010010800	0.00501998	0.019802	0.00192178	0.738223	1.757	FALSE	2989.41	0.103416	0.903344	1.64857	0.00896136	Early G1						Tb427-010016900	G2M
4509	Tb427-070085400:pseudogene	0.0130716	0.00990099	0.00205397	0.410808	4.80174	FALSE	450.015	0.00920516	0.990838	39.6498	0.00947471	Early G1						Tb427-010017400	G2M
8395	Tb427-110073000	0.000990999	0.00990099	0.00214014	0.840745	3.08624	FALSE	3891.09	0.152849	0.855245	1.53085	0.00982258	Early G1						Tb427-010019600	G2M
9273	Tb427-110169500	0	0.00990099	1.55632e-166	0.108008	4.95657	FALSE	9922.1	0.942982	0.359826	3.5504	3.01864e-163	G2M						Tb427-010019900	G2M
8841	Tb427-110125400	0	0.00990099	1.75625e-116	0.197301	4.88721	FALSE	8699.47	0.695512	0.475034	3.12226	1.31016e-113	G2M						Tb427-010020000	S
7558	Tb427-100153300	0	0.00990099	1.06055e-112	0.476617	4.92419	FALSE	6884.21	0.445063	0.631012	5.19861	5.714e-110	G2M						Tb427-010020100	S
5154	Tb427-080072900	0	0.00990099	1.03417e-112	0.433893	4.87669	FALSE	8535.29	0.656957	0.504352	3.60989	5.714e-110	G2M						Tb427-010020200	S
2561	Tb427-040029800	0	0.00990099	4.84765e-106	0.726308	4.83476	FALSE	11331.2	1.24572	0.241182	2.01904	2.04402e-103	G2M						Tb427-010020400	S
7077	Tb427-100102600	0	0.00990099	7.707e-90	0.803859	4.90614	FALSE	8711.66	0.671366	0.491067	2.94473	2.41105e-87	G2M						Tb427-010020500	Late G1
9250	Tb427-110167200	0	0.00990099	2.88168e-85	0.860716	4.97357	FALSE	6953.05	0.438686	0.627577	4.31303	8.7333e-83	G2M						Tb427-010022700	Late G1
7012	Tb427-100096100	0	0.00990099	3.74938e-72	0.700396	4.92911	FALSE	6796.33	0.421456	0.647045	4.78003	8.08033e-70	G2M						Tb427-010023300	G2M
2755	Tb427-040050400	0	0.00990099	9.31293e-70	0.982471	4.83758	FALSE	4784.74	0.239112	0.784242	7.96476	1.77092e-67	G2M						Tb427-010023900	Late G1
7630	Tb427-100161200	0	0.00990099	5.29184e-68	0.933226	4.92408	FALSE	10154.3	0.942547	0.350435	2.45322	9.68307e-66	G2M						Tb427-010024300	G2M
1391	Tb427-010017400	0	0.00990099	6.32311e-68	0.767333	3.3146	FALSE	12796.1	1.90836	0.0936784	1.57199	1.13558e-65	G2M						Tb427-010024600	G2M
7374	Tb427-100134100	0	0.00990099	1.08532e-66	0.178926	4.80217	FALSE	6231.92	0.358358	0.693999	4.10187	1.87954e-64	G2M						Tb427-010024700	Early G1
1588	Tb427-020011800	0	0.00990099	1.54829e-64	0.117126	4.90611	FALSE	9964.91	0.89751	0.376775	2.35161	2.58886e-62	G2M						Tb427-010024800	Late G1
4980	Tb427-080055400	0	0.00990099	2.95628e-63	0.894946	4.82907	FALSE	3097.73	0.127975	0.878378	13.8359	4.77833e-61	G2M						Tb427-010025200	S
7557	Tb427-100153200	0	0.00990099	4.48893e-63	0.727317	4.86593	FALSE	7992.14	0.557246	0.551077	3.01752	7.13666e-61	G2M						Tb427-010026900	Late G1
5495	Tb427-090025700	0	0.00990099	9.86767e-62	0.236416	4.54788	FALSE	6253.15	0.333275	0.706367	1.98557	1.49526e-59	G2M						Tb427-010027100	Late G1
6169	Tb427-100008500	0	0.00990099	1.16434e-61	0.0506641	4.88995	FALSE	8213.64	0.57328	0.545579	3.57829	1.71087e-59	G2M						Tb427-010027700	G2M
3267	Tb427-050052200	0	0.00990099	2.05328e-59	0.121695	4.83878	FALSE	7556.33	0.49611	0.597114	2.90033	2.8859e-57	G2M						Tb427-010027900:pseudogene	S
2756	Tb427-040050500	0	0.00990099	2.25741e-59	0.528242	4.92309	FALSE	6907.15	0.429676	0.637884	3.83704	3.12748e-57	G2M						Tb427-010028200	S
8517	Tb427-110085200	0	0.00990099	4.06042e-58	0.957094	4.89135	FALSE	6800.82	0.406026	0.669721	6.50503	5.25039e-56	G2M						Tb427-010028500	G2M
4302	Tb427-070063200	0	0.00990099	4.45414e-58	0.746476	4.93764	FALSE	3433.53	0.14409	0.864865	8.45655	5.68372e-56	G2M						Tb427-010028600	S
4617	Tb427-080017800	0	0.00990099	1.30359e-57	0.375142	4.92416	FALSE	7726.63	0.521583	0.577416	3.01111	1.64184e-55	G2M						Tb427-010029000	G2M
2178	Tb427-030046300	0	0.00990099	1.3334e-57	0.776959	4.41355	FALSE	3504.06	0.138746	0.865094	3.50099	1.65786e-55	G2M						Tb427-010029100	S
6807	Tb427-100074000	0	0.00990099	1.03214e-55	0.763108	4.93911	FALSE	6047.92	0.33584	0.708887	4.91066	1.23576e-53	G2M						Tb427-010029200	S
3616	Tb427-060042300	0	0.00990099	2.38838e-52	0.135632	4.85776	FALSE	9329.71	0.749087	0.438617	3.26923	2.57361e-50	G2M						Tb427-010030000	Late G1
8992	Tb427-110140900	0	0.00990099	4.05634e-45	0.347059	4.93999	FALSE	5738.19	0.298455	0.735227	3.75469	3.36225e-43	G2M						Tb427-010030200	Late G1
5890	Tb427-090066200	0	0.00990099	1.0337e-42	0.771278	4.75382	FALSE	9343.55	0.718567	0.470912	2.36695	7.83193e-41	G2M						Tb427-010031500	G2M
6200	Tb427-100011600	0	0.00990099	1.23857e-41	0.80159	4.53447	FALSE	7924.96	0.522724	0.576958	2.15033	9.09976e-40	G2M						Tb427-010032000	Late G1
6199	Tb427-100011500	0	0.00990099	1.00846e-40	0.0534787	4.80421	FALSE	5313.57	0.265172	0.761109	3.81411	7.24445e-39	G2M						Tb427-010033100	G2M
6202	Tb427-100011800	0	0.00990099	1.55804e-40	0.74485	4.81155	FALSE	4653.78	0.214818	0.803023	5.60114	1.10291e-38	G2M						Tb427-020005300	S
5585	Tb427-090034800	0	0.00990099	6.19487e-38	0.996889	4.89864	FALSE	10001.1	0.878257	0.370133	2.33192	4.17207e-36	G2M						Tb427-020006500	Late G1
5274	Tb427-080085400	0	0.00990099	1.3061e-37	0.266104	4.81301	FALSE	7840.15	0.514815	0.574668	2.38969	8.55851e-36	G2M						Tb427-020006600	G2M
7973	Tb427-110030300	0	0.00990099	3.1026e-37	0.884861	3.0464	FALSE	6691.1	0.377109	0.67476	2.1962	1.9666e-35	G2M						Tb427-020006700	S
4880	Tb427-080044700	0	0.00990099	4.53931e-37	0.902357	4.3609	FALSE	4299.77	0.188588	0.825928	6.05863	2.80396e-35	G2M						Tb427-020008100	G2M
1553	Tb427-020008100	0	0.00990099	1.17421e-36	0.798285	4.62107	FALSE	7537.8	0.471421	0.619102	2.3795	7.16192e-35	G2M						Tb427-020009100	G2M
8579	Tb427-110091400	0	0.00990099	2.66929e-35	0.585205	4.43013	FALSE	3922.31	0.167255	0.841961	4.04193	1.54088e-33	G2M						Tb427-020009500	Late G1
4843	Tb427-080041000	0	0.00990099	1.0657e-33	0.389719	4.86275	FALSE	5164.45	0.252874	0.771645	4.03381	5.83909e-32	G2M						Tb427-020010200	Late G1
4643	Tb427-080020700	0	0.00990099	7.62894e-32	0.808182	3.7926	FALSE	7582.16	0.47222	0.60994	2.13049	3.85341e-30	G2M						Tb427-020011600	G2M
2122	Tb427-030040300	0	0.00990099	7.67131e-32	0.761575	4.93762	FALSE	10755.7	1.04135	0.309895	1.77863	3.85473e-30	G2M						Tb427-020011800	G2M
5830	Tb427-090059800	0	0.00990099	9.70547e-30	0.667446	4.63334	FALSE	4868.66	0.224392	0.795694	3.05906	4.52517e-28	G2M						Tb427-020012900	G2M
7287	Tb427-100125300	0	0.00990099	1.45582e-29	0.969177	4.81419	FALSE	5081.64	0.243104	0.778516	3.46987	6.72314e-28	G2M						Tb427-020013000	G2M
8722	Tb427-110107000	0	0.00990099	2.65219e-29	0.919274	4.80664	FALSE	9275.45	0.73428	0.437929	1.79506	1.21325e-27	G2M						Tb427-020013700	G2M
8564	Tb427-110089900	0	0.00990099	2.9539e-29	0.555619	4.41963	FALSE	3566.56	0.146321	0.85891	4.42891	1.34493e-27	G2M						Tb427-020013800	Late G1
7678	Tb427-100167200	0	0.00990099	6.87638e-29	0.0709659	4.40816	FALSE	11038.6	1.11561	0.285158	1.98016	3.08737e-27	G2M						Tb427-020013900	Late G1
1586	Tb427-020011600	0	0.00990099	7.44272e-29	0.482552	4.91741	FALSE	8724.91	0.635502	0.505955	2.38977	3.32625e-27	G2M						Tb427-020014900	Late G1
8368	Tb427-110070300	0	0.00990099	4.23685e-28	0.613096	4.71278	FALSE	4372.45	0.191846	0.82066	3.60704	1.85085e-26	G2M						Tb427-020015000	Late G1
7980	Tb427-110031000	0	0.00990099	6.42801e-28	0.179382	4.2317	FALSE	10503.5	1.00488	0.305314	2.00917	2.77062e-26	G2M						Tb427-020015200	Late G1
5660	Tb427-090042800	0	0.00990099	1.07356e-26	0.312587	4.65848	FALSE	4134.06	0.181111	0.827073	4.4607	4.30222e-25	G2M						Tb427-020015300	Late G1
4673	Tb427-080023700	0	0.00990099	1.50614e-26	0.898742	4.38403	FALSE	7907.65	0.516146	0.568484	2.07115	5.98627e-25	G2M						Tb427-020015400	Late G1
3721	Tb427-060053400	0	0.00990099	4.11452e-26	0.989213	4.38113	FALSE	3423.28	0.135037	0.871736	5.02705	1.60898e-24	G2M						Tb427-020015600	Late G1
1992	Tb427-030024500	0	0.00990099	4.68771e-25	0.496631	4.37779	FALSE	6184.34	0.338648	0.70568	2.88447	1.74852e-23	G2M						Tb427-020015700	Late G1
1946	Tb427-030019900	0	0.00990099	8.6358e-25	0.418383	4.68771	FALSE	2698.28	0.100178	0.900596	7.37986	3.16038e-23	G2M						Tb427-020015800	Late G1
8253	Tb427-110058800	0	0.00990099	2.42082e-24	0.492462	4.68714	FALSE	4324.39	0.186605	0.822263	3.0121	8.79292e-23	G2M						Tb427-020016000	S
5556	Tb427-090031800	0	0.00990099	3.7569e-24	0.219476	4.53771	FALSE	10058.5	0.833331	0.418461	1.65133	1.34942e-22	G2M						Tb427-020016400	S
5952	Tb427-090073100	0	0.00990099	5.86489e-24	0.97625	4.52924	FALSE	9205.26	0.70409	0.461979	1.7865	2.06828e-22	G2M						Tb427-020016800	S
2280	Tb427-030057000	0	0.00990099	1.37013e-23	0.705036	4.33237	FALSE	4466.34	0.198276	0.814017	2.82881	4.73163e-22	G2M						Tb427-020017200	G2M
2139	Tb427-030042000	0	0.00990099	1.41077e-23	0.78945	4.66059	FALSE	2600.92	0.093897	0.909757	8.79217	4.85164e-22	G2M						Tb427-020017300	S
9045	Tb427-110146500	0	0.00990099	1.23324e-22	0.83058	4.73936	FALSE	3702.03	0.150839	0.855474	4.45348	4.09586e-21	G2M						Tb427-020017400	Late G1
6512	Tb427-100043800	0	0.00990099	2.38045e-22	0.271987	4.64821	FALSE	5301.72	0.256837	0.765918	3.05628	7.74683e-21	G2M						Tb427-020017500	G2M
9194	Tb427-110161600	0	0.00990099	3.8426e-22	0.594688	4.69214	FALSE	3531.16	0.140373	0.865323	3.79237	1.23806e-20	G2M						Tb427-020017800	G2M
3591	Tb427-060039800	0	0.00990099	1.36252e-21	0.330863	4.80836	FALSE	11077.3	1.10336	0.294091	1.62258	4.27627e-20	G2M						Tb427-020018000	S
3999	Tb427-070031100	0	0.00990099	2.54746e-21	0.11596	4.90008	FALSE	10185.3	0.877709	0.391434	2.31435	7.89305e-20	G2M						Tb427-020018600	G2M
2251	Tb427-030054100	0	0.00990099	5.12603e-21	0.979145	4.23762	FALSE	6292.83	0.336308	0.704535	1.83554	1.56328e-19	G2M						Tb427-020018700	Late G1
6569	Tb427-100049600	0	0.00990099	5.69209e-21	0.540054	4.76621	FALSE	10188.6	0.911671	0.351122	1.75963	1.72829e-19	G2M						Tb427-020019300	Late G1
9164	Tb427-110158600	0	0.00990099	1.43786e-20	0.565793	4.62877	FALSE	7691.52	0.483826	0.598259	1.88801	4.27742e-19	G2M						Tb427-020019900	G2M
7132	Tb427-100108100	0	0.00990099	3.58996e-20	0.803867	4.40045	FALSE	6370.74	0.345088	0.695602	2.3885	1.04238e-18	G2M						Tb427-020020300	Late G1
6446	Tb427-100037200	0	0.00990099	4.8724e-19	0.959842	4.54338	FALSE	4818.1	0.219088	0.797755	2.90573	1.31257e-17	G2M						Tb427-020021100	G2M
1474	Tb427-010027700	0	0.00990099	6.37699e-19	0.669933	4.47047	FALSE	8542.71	0.590918	0.53344	1.82472	1.70369e-17	G2M						Tb427-020021300	S
8678	Tb427-110102400	0	0.00990099	8.24272e-19	0.194432	3.33107	FALSE	4624.03	0.20799	0.804627	2.8633	2.17814e-17	G2M						Tb427-020021900	G2M
7644	Tb427-100162600	0	0.00990099	1.55511e-18	0.53845	4.39054	FALSE	4071.06	0.167435	0.843793	4.19804	4.03248e-17	G2M						Tb427-020023400	S
7633	Tb427-100161500	0	0.00990099	2.21476e-18	0.416224	3.96581	FALSE	4894.46	0.223493	0.795465	2.72071	5.6672e-17	G2M						Tb427-020024300	G2M
1763	Tb427-020029700	0	0.00990099	2.8051e-18	0.295044	4.25322	FALSE	4610.76	0.205369	0.809208	2.6044	7.10283e-17	G2M						Tb427-020024900	Late G1
7976	Tb427-110030600	0	0.00990099	5.15251e-18	0.727491	4.43823	FALSE	5092.64	0.237428	0.780119	2.69018	1.29119e-16	G2M						Tb427-020025000	Late G1
8794	Tb427-110120700	0	0.00990099	6.22343e-18	0.551099	4.47904	FALSE	6386.67	0.348733	0.69148	1.93954	1.5436e-16	G2M						Tb427-020025300	S
4140	Tb427-070047000	0	0.00990099	1.30548e-17	0.50071	4.02181	FALSE	9232.02	0.711438	0.453046	1.92008	3.2052e-16	G2M						Tb427-020026400	Late G1
5301	Tb427-080088300	0	0.00990099	1.42179e-17	0.837655	1.43831	FALSE	5629.11	0.280481	0.745534	2.61961	3.47319e-16	G2M						Tb427-020027200	G2M
7933	Tb427-110026300	0	0.00990099	1.46272e-17	0.286029	4.49798	FALSE	5043.41	0.235788	0.777371	2.13281	3.56418e-16	G2M						Tb427-020027400	S
2007	Tb427-030027300	0	0.00990099	2.13261e-17	0.176206	4.49056	FALSE	2100.55	0.0695631	0.930371	6.94536	5.13202e-16	G2M						Tb427-020027500	Late G1
4674	Tb427-080023900	0	0.00990099	6.8701e-17	0.876654	3.83851	FALSE	6732.45	0.378354	0.671095	2.49337	1.60545e-15	G2M						Tb427-020029700	G2M
6577	Tb427-100050400	0	0.00990099	7.76613e-17	0.124464	4.61042	FALSE	2937.92	0.107283	0.896931	4.11278	1.81048e-15	G2M						Tb427-020029800	Late G1
38	Tb427-000014700	0	0.00990099	9.82739e-17	0.898421	4.80425	FALSE	8521.53	0.584507	0.54306	1.78292	2.26919e-15	G2M						Tb427-020030100	S
7022	Tb427-100097100	0	0.00990099	1.10491e-16	0.16511	4.50339	FALSE	3193.61	0.119364	0.884563	4.45039	2.53319e-15	G2M						Tb427-020030200	S
8819	Tb427-110123200	0	0.00990099	1.54179e-16	0.612444	4.22146	FALSE	3814.1	0.152962	0.855016	2.55886	3.49351e-15	G2M						Tb427-020030300	G2M
5306	Tb427-080088800	0	0.00990099	1.9037e-16	0.374396	4.07793	FALSE	11137.5	1.13645	0.275309	1.55949	4.2935e-15	G2M						Tb427-020031300	G2M
8491	Tb427-110082600	0	0.00990099	2.33621e-16	0.879643	4.56947	FALSE	4352.27	0.186277	0.82547	3.03262	5.22041e-15	G2M						Tb427-020031400	Late G1
6516	Tb427-100044200	0	0.00990099	2.57287e-16	0.147876	4.3795	FALSE	5596.67	0.275113	0.756757	3.54294	5.70978e-15	G2M						Tb427-020032100	S
1451	Tb427-010024600	0	0.00990099	2.96573e-16	0.597481	4.51388	FALSE	4283.76	0.1814	0.831883	3.3557	6.55163e-15	G2M						Tb427-020032200	G2M
128	Tb427-000110300	0	0.00990099	3.58245e-16	0.300479	4.85334	FALSE	8835.84	0.615207	0.538021	2.03192	7.89604e-15	G2M						Tb427-020032900	G2M
7560	Tb427-100153500	0	0.00990099	1.14879e-15	0.431049	4.94148	FALSE	4701.2	0.210054	0.800046	2.48871	2.46482e-14	G2M						Tb427-030005200	Late G1
1645	Tb427-020017800	0	0.00990099	1.35524e-15	0.95346	3.91602	FALSE	10433.4	0.939954	0.353871	1.62029	2.88227e-14	G2M						Tb427-030005700	Late G1
4841	Tb427-080040800	0	0.00990099	1.41385e-15	0.886528	4.20379	FALSE	5503.09	0.267114	0.76088	2.30903	3.00033e-14	G2M						Tb427-030006600	Late G1
5816	Tb427-090058400	0	0.00990099	1.49271e-15	0.705208	2.15601	FALSE	7796.41	0.493699	0.587494	1.51611	3.14702e-14	G2M						Tb427-030007000	S
5527	Tb427-090028900	0	0.00990099	1.51197e-15	0.516115	4.5974	FALSE	6903.96	0.40006	0.647732	1.78885	3.18072e-14	G2M						Tb427-030008000	Late G1
5690	Tb427-090045800	0	0.00990099	2.70687e-15	0.948075	4.21237	FALSE	3838.02	0.155372	0.850206	2.56973	5.59728e-14	G2M						Tb427-030008300	Early G1
8728	Tb427-110107600	0	0.00990099	3.61978e-15	0.468864	3.81026	FALSE	7282	0.434356	0.633074	1.99647	7.43742e-14	G2M						Tb427-030008400	Late G1
2220	Tb427-030050600	0	0.00990099	6.8513e-15	0.31375	4.59476	FALSE	7438.01	0.453317	0.614521	2.03154	1.39295e-13	G2M						Tb427-030008900	Late G1
8172	Tb427-110050600	0	0.00990099	7.64524e-15	0.939994	3.84707	FALSE	4175.06	0.176999	0.829821	3.43836	1.54466e-13	G2M						Tb427-030009000	S
5364	Tb427-090011400	0	0.00990099	9.90717e-15	0.689662	4.10701	FALSE	6344.54	0.339686	0.700641	1.68236	1.98923e-13	G2M						Tb427-030009300	S
5579	Tb427-090034200	0	0.00990099	1.00752e-14	0.70486	4.50246	FALSE	4553.3	0.199628	0.812185	2.6257	2.01463e-13	G2M						Tb427-030009700	Late G1
4170	Tb427-070050000	0	0.00990099	1.35524e-14	0.646912	4.03759	FALSE	4639.84	0.205745	0.80394	2.03884	2.68551e-13	G2M						Tb427-030010200	S
3022	Tb427-050025700	0	0.00990099	1.71693e-14	0.598372	4.48584	FALSE	3063.51	0.11163	0.893266	3.59773	3.3706e-13	G2M						Tb427-030010800	Late G1
2125	Tb427-030040600	0	0.00990099	1.83953e-14	0.878047	4.39782	FALSE	8896.64	0.637107	0.513055	1.78972	3.60399e-13	G2M						Tb427-030010900	S
2123	Tb427-030040400	0	0.00990099	2.53217e-14	0.239058	4.47147	FALSE	8390.41	0.564192	0.555428	1.92749	4.92124e-13	G2M						Tb427-030011500	S
5133	Tb427-080070700	0	0.00990099	2.55588e-14	0.284003	4.6295	FALSE	4455.89	0.194418	0.817682	2.75529	4.95738e-13	G2M						Tb427-030011600	S
9051	Tb427-110147100	0	0.00990099	2.60179e-14	0.915443	1.86269	FALSE	1499.02	0.0418839	0.959001	5.04585	5.03637e-13	G2M						Tb427-030011700	Late G1
9392	Tb427-110181700	0	0.00990099	2.74857e-14	0.850915	4.62955	FALSE	4419.06	0.187994	0.826844	2.48291	5.30988e-13	G2M						Tb427-030012100	Late G1
6830	Tb427-100077200	0	0.00990099	2.88269e-14	0.496451	3.47485	FALSE	5875.57	0.296117	0.73683	1.95073	5.54689e-13	G2M						Tb427-030012300	S
5526	Tb427-090028800	0	0.00990099	4.93092e-14	0.175215	4.41424	FALSE	6847.76	0.388933	0.665369	1.73896	9.33986e-13	G2M						Tb427-030012800	S
7081	Tb427-100103000	0	0.00990099	1.06274e-13	0.080512	4.11902	FALSE	4739.5	0.209273	0.811269	3.57293	1.97821e-12	G2M						Tb427-030013500	G2M
2775	Tb427-040052400	0	0.00990099	1.32087e-13	0.83048	4.60379	FALSE	7226.55	0.427243	0.640632	1.965	2.44929e-12	G2M						Tb427-030013900	Late G1
4849	Tb427-080041600	0	0.00990099	1.7899e-13	0.571104	3.756	FALSE	5436.93	0.259479	0.768438	2.35762	3.30008e-12	G2M						Tb427-030014200	G2M
3155	Tb427-050039400	0	0.00990099	2.09576e-13	0.211676	3.6451	FALSE	3972.45	0.159762	0.849748	2.4651	3.84937e-12	G2M						Tb427-030014300	S
7209	Tb427-100117000	0	0.00990099	3.26094e-13	0.710085	3.91964	FALSE	4067.13	0.166852	0.840815	2.12286	5.97818e-12	G2M						Tb427-030014400	S
8089	Tb427-110042200	0	0.00990099	3.55272e-13	0.819596	3.39819	FALSE	4334.96	0.18513	0.822721	2.45908	6.48856e-12	G2M						Tb427-030014700	S
7389	Tb427-100135600	0	0.00990099	4.04643e-13	0.472327	4.49622	FALSE	8596.67	0.601924	0.523133	2.24933	7.34875e-12	G2M						Tb427-030014800	S
2587	Tb427-040032400	0	0.00990099	4.44533e-13	0.132446	4.04283	FALSE	4164.89	0.17453	0.834173	2.36037	8.04307e-12	G2M						Tb427-030015300	S
5758	Tb427-090052600	0	0.00990099	4.90049e-13	0.563121	4.59601	FALSE	7624.92	0.470895	0.609482	2.09817	8.85008e-12	G2M						Tb427-030015800	S
3606	Tb427-060041300	0	0.00990099	6.74588e-13	0.983485	4.75423	FALSE	3818.97	0.151518	0.856848	2.54909	1.19165e-11	G2M						Tb427-030016100	S
6813	Tb427-100075200	0	0.00990099	1.23183e-12	0.349246	4.40169	FALSE	4608.54	0.202121	0.812185	3.45617	2.11439e-11	G2M						Tb427-030016400	S
5486	Tb427-090024800	0	0.00990099	1.5482e-12	0.54373	4.39259	FALSE	5623.63	0.275421	0.751031	2.7582	2.63874e-11	G2M						Tb427-030016500	Late G1
6010	Tb427-090080300	0	0.00990099	4.20587e-12	0.2803	3.40189	FALSE	5244.3	0.243792	0.779203	1.62836	6.93683e-11	G2M						Tb427-030016600	Late G1
7240	Tb427-100120100	0	0.00990099	4.25936e-12	0.565751	1.70689	FALSE	8542.75	0.605599	0.507787	1.63992	7.01312e-11	G2M						Tb427-030016700	S
9391	Tb427-110181600	0	0.00990099	6.89321e-12	0.0745259	4.19293	FALSE	6238.67	0.326475	0.716445	1.80458	1.11417e-10	G2M						Tb427-030018300	Late G1
6909	Tb427-100085200	0	0.00990099	9.65935e-12	0.167794	4.63315	FALSE	10324.7	0.884479	0.391205	1.60204	1.53316e-10	G2M						Tb427-030018700	S
7151	Tb427-100110000	0	0.00990099	1.04365e-11	0.986759	1.00015	FALSE	3580.43	0.138692	0.865323	3.00301	1.64842e-10	G2M						Tb427-030018800	Late G1
7415	Tb427-100138200	0	0.00990099	2.01706e-11	0.248475	3.84994	FALSE	4341.24	0.18364	0.828676	2.52393	3.11488e-10	G2M						Tb427-030019600	G2M
5106	Tb427-080068000	0	0.00990099	3.07008e-11	0.335996	4.27921	FALSE	5794.64	0.289245	0.739808	1.71521	4.63763e-10	G2M						Tb427-030019900	G2M
3428	Tb427-060020800:pseudogene	0	0.00990099	3.53198e-11	0.791156	3.25477	FALSE	9078.57	0.671053	0.487861	1.66863	5.31056e-10	G2M						Tb427-030020100	S
3016	Tb427-050025100	0	0.00990099	5.13147e-11	0.148998	3.76781	FALSE	4343.8	0.183658	0.825699	2.09827	7.63267e-10	G2M						Tb427-030020200	S
3556	Tb427-060036300	0	0.00990099	6.48115e-11	0.912033	4.11655	FALSE	3797.71	0.149518	0.858223	3.44804	9.50895e-10	G2M						Tb427-030020400	G2M
7984	Tb427-110031400	0	0.00990099	9.19661e-11	0.749495	3.95375	FALSE	7301.64	0.429589	0.641319	1.86221	1.32131e-09	G2M						Tb427-030020700	G2M
6970	Tb427-100091700	6.63873e-06	0.00990099	9.88234e-11	0.546022	3.77338	FALSE	8061.88	0.529589	0.560009	1.60025	1.41774e-09	G2M						Tb427-030021100	S
1666	Tb427-020019900	0	0.00990099	1.13185e-10	0.468601	3.65987	FALSE	3892.66	0.155718	0.850206	2.19658	1.61422e-09	G2M						Tb427-030022000	Early G1
4821	Tb427-080038700	0	0.00990099	1.63944e-10	0.0326996	3.20472	FALSE	2538.84	0.0846598	0.917774	3.80018	2.31768e-09	G2M						Tb427-030022800	S
2035	Tb427-030030100	0	0.00990099	1.83884e-10	0.194157	4.03851	FALSE	3837.2	0.152244	0.8541	1.98284	2.58451e-09	G2M						Tb427-030023000	S
4094	Tb427-070042400	0	0.00990099	2.01119e-10	0.300194	3.30471	FALSE	7698.34	0.472886	0.613376	1.68753	2.81046e-09	G2M						Tb427-030023100:pseudogene	G2M
2112	Tb427-030039300	0	0.00990099	2.27387e-10	0.784107	1.85485	FALSE	3051.47	0.109583	0.892808	2.83194	3.15931e-09	G2M						Tb427-030024500	G2M
6562	Tb427-100048900	0	0.00990099	2.85535e-10	0.809233	4.42027	FALSE	4154.02	0.173244	0.835089	2.37068	3.91671e-09	G2M						Tb427-030026700	G2M
2719	Tb427-040046800:pseudogene	0	0.00990099	3.05704e-10	0.264502	2.37946	FALSE	3888.97	0.155284	0.8541	2.67943	4.18746e-09	G2M						Tb427-030027300	G2M
5092	Tb427-080066600	0	0.00990099	3.31087e-10	0.0746436	3.51966	FALSE	6889.71	0.385038	0.675676	1.99572	4.50967e-09	G2M						Tb427-030027800	S
8938	Tb427-110135400	0	0.00990099	4.00828e-10	0.725518	1.94237	FALSE	5673.92	0.280059	0.746221	1.97457	5.42152e-09	G2M						Tb427-030028000	G2M
5558	Tb427-090032000	0	0.00990099	4.06195e-10	0.212497	4.32495	FALSE	6649.76	0.36518	0.684379	2.02107	5.47973e-09	G2M						Tb427-030028100	G2M
4116	Tb427-070044600	0	0.00990099	5.56055e-10	0.287736	4.57309	FALSE	3632.82	0.140742	0.862574	2.21869	7.40745e-09	G2M						Tb427-030028200	Late G1
5734	Tb427-090050200	0	0.00990099	6.37936e-10	0.832138	3.41302	FALSE	3871.9	0.154231	0.850893	1.82129	8.45178e-09	G2M						Tb427-030028400	G2M
8863	Tb427-110127600	0	0.00990099	8.2431e-10	0.286281	4.05004	FALSE	4022.89	0.163981	0.841732	1.93964	1.07593e-08	G2M						Tb427-030028500	Late G1
3930	Tb427-070024000	0	0.00990099	1.20681e-09	0.262924	4.21831	FALSE	3794.14	0.149025	0.859597	2.09197	1.54605e-08	G2M						Tb427-030028700	G2M
4231	Tb427-070056100	0	0.00990099	1.38109e-09	0.391439	4.37661	FALSE	3332.77	0.124431	0.881356	2.78203	1.75312e-08	G2M						Tb427-030029500	G2M
4925	Tb427-080049200	0	0.00990099	1.4285e-09	0.381691	4.37344	FALSE	8032.6	0.517971	0.579249	1.71634	1.81092e-08	G2M						Tb427-030029700	G2M
1482	Tb427-010028500	0	0.00990099	1.68891e-09	0.579623	4.49616	FALSE	4757.64	0.210468	0.805772	1.94698	2.12991e-08	G2M						Tb427-030029900	S
8759	Tb427-110110700	0	0.00990099	1.84297e-09	0.486274	3.4993	FALSE	3693.43	0.144739	0.859139	2.23674	2.31518e-08	G2M						Tb427-030030000	G2M
7825	Tb427-110015300	2.53569e-06	0.00990099	2.24851e-09	0.0960972	2.63235	FALSE	2874.65	0.0993107	0.903573	2.22248	2.78849e-08	G2M						Tb427-030030100	G2M
8460	Tb427-110079500	0	0.00990099	2.56624e-09	0.369111	4.3821	FALSE	8328.88	0.565587	0.538708	1.79534	3.1543e-08	G2M						Tb427-030030700	G2M
7569	Tb427-100154400	0	0.00990099	2.65873e-09	0.938546	3.06375	FALSE	5977.99	0.307543	0.71759	1.57864	3.25972e-08	G2M						Tb427-030030900	G2M
7605	Tb427-100158000	0	0.00990099	3.17295e-09	0.132894	3.2879	FALSE	3082.91	0.110726	0.89235	2.61975	3.85605e-08	G2M						Tb427-030031000	G2M
2021	Tb427-030028700	0	0.00990099	3.29074e-09	0.518173	4.70415	FALSE	2223.49	0.071699	0.929455	6.26842	3.99419e-08	G2M						Tb427-030031200	G2M
7265	Tb427-100123100	0	0.00990099	3.49265e-09	0.807958	3.39805	FALSE	3206.68	0.117312	0.886395	3.00423	4.22867e-08	G2M						Tb427-030031700	S
7999	Tb427-110032900	0	0.00990099	4.48827e-09	0.584229	3.72407	FALSE	2657.07	0.0893578	0.915025	3.93804	5.3605e-08	G2M						Tb427-030031800	S
1769	Tb427-020030300	0	0.00990099	5.78454e-09	0.565386	3.98421	FALSE	4695.65	0.203892	0.815163	2.56013	6.87481e-08	G2M						Tb427-030032200:pseudogene	S
2029	Tb427-030029500	0	0.00990099	6.05167e-09	0.232822	3.49883	FALSE	3512	0.133188	0.871965	2.36918	7.1747e-08	G2M						Tb427-030032300	S
6316	Tb427-100023300	0	0.00990099	6.76608e-09	0.600144	4.6105	FALSE	2696.35	0.0929978	0.907238	3.04908	8.00213e-08	G2M						Tb427-030032600	S
4460	Tb427-070080100	0	0.00990099	7.38756e-09	0.935223	4.31438	FALSE	2975.41	0.106208	0.896015	2.68072	8.7053e-08	G2M						Tb427-030033600	S
1709	Tb427-020024300	4.33083e-07	0.00990099	8.47248e-09	0.126117	3.92361	FALSE	3399.84	0.126436	0.879524	2.80562	9.87573e-08	G2M						Tb427-030034000	S
2109	Tb427-030039000	0	0.00990099	8.9026e-09	0.153859	4.55097	FALSE	3569.32	0.135783	0.871507	2.51006	1.03646e-07	G2M						Tb427-030034500	S
9463	Tb427-110188800	0	0.00990099	9.96306e-09	0.0287544	4.0823	FALSE	3754.09	0.147197	0.859368	2.48697	1.153e-07	G2M						Tb427-030034600	G2M
8406	Tb427-110074100	0	0.00990099	1.01681e-08	0.840009	1.00037	FALSE	3507.9	0.133666	0.869217	2.484	1.17338e-07	G2M						Tb427-030037200	Late G1
8775	Tb427-110118800	0	0.00990099	1.1633e-08	0.989723	3.82199	FALSE	4190.52	0.173998	0.832341	1.93812	1.33669e-07	G2M						Tb427-030037700	S
7610	Tb427-100158500	0	0.00990099	1.36674e-08	0.650298	3.80171	FALSE	3930.09	0.156544	0.852955	2.42976	1.55571e-07	G2M						Tb427-030037800	S
1539	Tb427-020006600	1.42623e-06	0.00990099	1.84556e-08	0.240347	1.90707	FALSE	3145.45	0.11297	0.890518	2.22505	2.06917e-07	G2M						Tb427-030038100	Late G1
2690	Tb427-040043300	0	0.00990099	1.95248e-08	0.951245	4.07289	FALSE	4028.82	0.162609	0.845167	2.17358	2.1865e-07	G2M						Tb427-030038800	Early G1
3604	Tb427-060041100	0	0.00990099	2.18878e-08	0.666067	4.31901	FALSE	3052.67	0.109188	0.895557	3.96642	2.44267e-07	G2M						Tb427-030039000	G2M
1338	Tb427-010011800	0	0.00990099	2.44155e-08	0.327691	4.37434	FALSE	5559.09	0.267495	0.761567	1.90688	2.71227e-07	G2M						Tb427-030039300	G2M
1607	Tb427-020013700	0	0.00990099	2.81514e-08	0.0571271	4.05691	FALSE	2859.97	0.098411	0.908841	4.44561	3.11303e-07	G2M						Tb427-030039700	S
6453	Tb427-100037900	0	0.00990099	3.20476e-08	0.257713	3.17097	FALSE	2421.17	0.0785172	0.924874	3.28027	3.52778e-07	G2M						Tb427-030040300	G2M
1678	Tb427-020021100	0	0.00990099	3.59679e-08	0.752757	3.62031	FALSE	4188.2	0.172826	0.835089	1.74751	3.94143e-07	G2M						Tb427-030040400	G2M
8382	Tb427-110071700	0	0.00990099	3.91135e-08	0.835519	3.57382	FALSE	3052.87	0.108854	0.893953	3.53601	4.27165e-07	G2M						Tb427-030040600	G2M
1653	Tb427-020018600	1.30149e-06	0.00990099	4.1747e-08	0.983499	3.65882	FALSE	5278.69	0.248713	0.76798	1.55087	4.55085e-07	G2M						Tb427-030041000	Late G1
4567	Tb427-080010700	0	0.00990099	4.39581e-08	0.610167	2.93304	FALSE	5182.81	0.240593	0.780348	1.99523	4.75787e-07	G2M						Tb427-030041100	Late G1
2631	Tb427-040037200	0	0.00990099	4.63844e-08	0.420304	4.2341	FALSE	3122.56	0.112517	0.890976	2.40782	5.0093e-07	G2M						Tb427-030042000	G2M
4688	Tb427-080025300	0	0.00990099	4.67821e-08	0.603717	3.95711	FALSE	4671.78	0.202848	0.816308	2.82587	5.04664e-07	G2M						Tb427-030042500	Late G1
7743	Tb427-110007000	0	0.00990099	4.75144e-08	0.112628	3.73351	FALSE	2721	0.092787	0.911131	3.66167	5.11994e-07	G2M						Tb427-030043000	S
1448	Tb427-010024300	1.00898e-07	0.00990099	5.08857e-08	0.825421	3.83712	FALSE	4018.58	0.161676	0.847229	2.36543	5.465e-07	G2M						Tb427-030043600	S
6702	Tb427-100063000	0	0.00990099	5.16028e-08	0.552493	1.86751	FALSE	4144.87	0.168978	0.843335	2.12285	5.52977e-07	G2M						Tb427-030045700	G2M
1686	Tb427-020021900	0	0.00990099	5.68223e-08	0.778313	4.15781	FALSE	7570.99	0.462994	0.613376	1.67294	6.08237e-07	G2M						Tb427-030046000	S
8386	Tb427-110072100	0	0.00990099	5.72901e-08	0.746995	3.67546	FALSE	2652.09	0.090089	0.910215	2.77395	6.12569e-07	G2M						Tb427-030046300	G2M
2688	Tb427-040043100	2.95065e-06	0.00990099	6.17696e-08	0.529657	4.58585	FALSE	2485.31	0.0816096	0.919148	3.09276	6.59011e-07	G2M						Tb427-030047400	G2M
2044	Tb427-030031000	5.9484e-07	0.00990099	6.75176e-08	0.205541	4.07447	FALSE	4455.39	0.188841	0.824095	1.81973	7.17181e-07	G2M						Tb427-030047500	Late G1
3446	Tb427-060023700	0	0.00990099	7.14066e-08	0.754612	3.66397	FALSE	3279.01	0.120769	0.883188	1.97036	7.55181e-07	G2M						Tb427-030047800	Late G1
6991	Tb427-100094000	0	0.00990099	7.35768e-08	0.447908	3.53904	FALSE	8478.4	0.581767	0.533669	1.5563	7.74753e-07	G2M						Tb427-030048400	Early G1
4656	Tb427-080022000	0	0.00990099	7.5804e-08	0.690092	4.70963	FALSE	3025.75	0.107983	0.895328	2.61402	7.96476e-07	G2M						Tb427-030049500	G2M
4540	Tb427-080008000	0	0.00990099	8.04452e-08	0.0124215	3.92738	FALSE	4447.69	0.189641	0.823866	2.74723	8.41594e-07	G2M						Tb427-030049700	Late G1
4814	Tb427-080038000	2.47705e-06	0.00990099	1.01567e-07	0.866609	3.03458	FALSE	2520.87	0.0829952	0.917774	2.64859	1.05123e-06	G2M						Tb427-030049800	Late G1
8101	Tb427-110043400	1.34374e-06	0.00990099	1.05737e-07	0.771885	3.00613	FALSE	4433.92	0.188158	0.822492	1.74084	1.09321e-06	G2M						Tb427-030050500	Late G1
6860	Tb427-100080200	1.81921e-06	0.00990099	1.13175e-07	0.788676	3.29902	FALSE	3744.04	0.14571	0.860742	2.25391	1.16515e-06	G2M						Tb427-030050600	G2M
8686	Tb427-110103200	0	0.00990099	1.29163e-07	0.388678	3.83717	FALSE	3174.8	0.115857	0.886853	2.55356	1.32133e-06	G2M						Tb427-030051000	G2M
5733	Tb427-090050100	1.53039e-06	0.00990099	1.31195e-07	0.252282	3.7479	FALSE	7442.79	0.451049	0.616354	1.68308	1.3407e-06	G2M						Tb427-030051700	S
4543	Tb427-080008300	1.23496e-06	0.00990099	1.45777e-07	0.520484	2.65413	FALSE	5932.64	0.300035	0.730188	1.58766	1.48036e-06	G2M						Tb427-030052000	G2M
4860	Tb427-080042700	5.77736e-06	0.00990099	1.49794e-07	0.235461	4.23899	FALSE	3370.3	0.124528	0.880669	1.9279	1.51956e-06	G2M						Tb427-030053000	Late G1
5323	Tb427-090006300	0	0.00990099	1.66772e-07	0.0416976	1.00029	FALSE	7913.99	0.51288	0.567339	1.51402	1.6795e-06	G2M						Tb427-030053500	S
6313	Tb427-100023000	0	0.00990099	1.77358e-07	0.0322788	4.02533	FALSE	4428.85	0.188829	0.820889	1.77907	1.78241e-06	G2M						Tb427-030053600	S
8121	Tb427-110045400	0	0.00990099	1.90942e-07	0.467674	4.26897	FALSE	3840.54	0.15125	0.856848	1.89712	1.90903e-06	G2M						Tb427-030054100	G2M
6997	Tb427-100094600	5.97122e-06	0.00990099	1.99586e-07	0.61714	2.94565	FALSE	5303.47	0.249629	0.768896	1.67323	1.98726e-06	G2M						Tb427-030054700	S
3572	Tb427-060037900	7.35307e-07	0.00990099	2.09996e-07	0.843626	4.75849	FALSE	3323.44	0.122321	0.883646	3.08657	2.08448e-06	G2M						Tb427-030055100	Late G1
1943	Tb427-030019600	0	0.00990099	2.6682e-07	0.212021	4.64672	FALSE	2861.08	0.0992852	0.904031	3.64718	2.6164e-06	G2M						Tb427-030055500	S
2579	Tb427-040031600	0	0.00990099	2.68806e-07	0.239044	2.97539	FALSE	4257.96	0.177578	0.831425	2.17857	2.63321e-06	G2M						Tb427-030055700	S
2448	Tb427-040018500	0	0.00990099	2.69087e-07	0.638302	4.48616	FALSE	2895.18	0.100923	0.90197	2.45525	2.63331e-06	G2M						Tb427-030056000	S
6832	Tb427-100077400	0	0.00990099	2.71044e-07	0.0451556	4.80207	FALSE	5579.47	0.268712	0.761109	2.54006	2.64978e-06	G2M						Tb427-030056400	Late G1
3021	Tb427-050025600	1.55563e-05	0.00990099	3.09615e-07	0.843455	4.27437	FALSE	8050.66	0.520944	0.573294	1.7728	3.00484e-06	G2M						Tb427-030056900	Late G1
4825	Tb427-080039100	0	0.00990099	3.36966e-07	0.246341	4.1484	FALSE	7723.38	0.479319	0.604443	1.5016	3.25488e-06	G2M						Tb427-030057000	G2M
1359	Tb427-010013900	0	0.00990099	3.49621e-07	0.961852	4.17742	FALSE	6259.53	0.328441	0.710719	2.18461	3.36372e-06	G2M						Tb427-030057200	S
9122	Tb427-110154400	5.62905e-08	0.00990099	3.8779e-07	0.520388	3.82731	FALSE	5003.98	0.228786	0.7847	1.70182	3.70156e-06	G2M						Tb427-030058400	Late G1
5821	Tb427-090058900	2.30667e-07	0.00990099	3.92198e-07	0.0659372	4.40813	FALSE	5487.62	0.262308	0.764315	1.76483	3.73628e-06	G2M						Tb427-030058600	S
7565	Tb427-100154000	5.38888e-07	0.00990099	3.96294e-07	0.0248351	3.23833	FALSE	4114.65	0.16784	0.840357	1.87105	3.7716e-06	G2M						Tb427-030059300	G2M
7698	Tb427-100169200	0	0.00990099	4.03121e-07	0.976045	3.81197	FALSE	3484.4	0.131784	0.871965	2.82742	3.83281e-06	G2M						Tb427-030059700	Late G1
2574	Tb427-040031100	-2.6095e-07	0.00990099	4.04714e-07	0.162648	3.94936	FALSE	3303.34	0.121114	0.884563	2.13378	3.84419e-06	G2M						Tb427-030060000	S
1292	Tb427-010007200	3.64553e-06	0.00990099	4.6825e-07	0.11195	3.6314	FALSE	2822.8	0.0966206	0.907238	2.0281	4.40028e-06	G2M						Tb427-030060100	G2M
6413	Tb427-100033600	4.66577e-05	0.00990099	4.71944e-07	0.333954	4.69419	FALSE	6904.36	0.385401	0.672698	1.85351	4.42213e-06	G2M						Tb427-040005500	G2M
2174	Tb427-030045700	4.10132e-06	0.00990099	4.95873e-07	0.822898	4.8036	FALSE	4403.01	0.184976	0.829134	2.36051	4.63292e-06	G2M						Tb427-040006000	G2M
2458	Tb427-040019500	0	0.00990099	5.16881e-07	0.082435	1.00033	FALSE	3240.71	0.119111	0.881814	2.45327	4.81067e-06	G2M						Tb427-040006600	G2M
3018	Tb427-050025300	-1.18952e-07	0.00990099	5.4171e-07	0.439459	1.00016	FALSE	5518.8	0.26538	0.758818	1.66943	5.02727e-06	G2M						Tb427-040007200	Late G1
1384	Tb427-010016500:pseudogene	0	0.00990099	5.834e-07	0.811847	3.55487	FALSE	3260.25	0.119252	0.884792	2.93156	5.3884e-06	G2M						Tb427-040007800	G2M
4185	Tb427-070051500	0	0.00990099	5.9883e-07	0.124841	1.00011	FALSE	2790.65	0.0962525	0.904947	2.77222	5.50179e-06	G2M						Tb427-040008000	G2M
6444	Tb427-100037000	0	0.00990099	6.07477e-07	0.947118	1.00009	FALSE	6278.66	0.32856	0.711406	1.6736	5.57362e-06	G2M						Tb427-040008600	G2M
5543	Tb427-090030500	0	0.00990099	6.19971e-07	0.832902	3.70654	FALSE	2658.47	0.0896141	0.912506	2.62132	5.6668e-06	G2M						Tb427-040009000	S
1405	Tb427-010019900	2.11216e-06	0.00990099	7.04624e-07	0.035511	4.86319	FALSE	5563.15	0.269389	0.75607	1.93783	6.3864e-06	G2M						Tb427-040009800	Late G1
9243	Tb427-110166500	1.93379e-05	0.00990099	9.90137e-07	0.406428	3.95116	FALSE	3246.73	0.117333	0.88983	2.5743	8.8095e-06	G2M						Tb427-040010000	G2M
4172	Tb427-070050200	8.01285e-06	0.00990099	1.00593e-06	0.7301	3.66612	FALSE	5160.12	0.237163	0.783097	1.95374	8.93359e-06	G2M						Tb427-040010100	G2M
42	Tb427-000015200:pseudogene	2.23783e-05	0.00990099	1.08776e-06	0.700795	3.9488	FALSE	8589.91	0.582224	0.549015	1.61087	9.62512e-06	G2M						Tb427-040010600	S
3625	Tb427-060043200	5.74826e-07	0.00990099	1.09018e-06	0.0097088	2.8565	FALSE	4619.36	0.200491	0.812185	1.90995	9.63771e-06	G2M						Tb427-040011900	S
9163	Tb427-110158500	5.14145e-07	0.00990099	1.11591e-06	0.0463386	3.28512	FALSE	5597.04	0.271124	0.754695	1.72208	9.84719e-06	G2M						Tb427-040012300	G2M
6725	Tb427-100065300	0	0.00990099	1.16308e-06	0.835674	3.99753	FALSE	2576.7	0.0858142	0.916628	2.44525	1.02448e-05	G2M						Tb427-040012800	S
4977	Tb427-080054800	9.46491e-07	0.00990099	1.30403e-06	0.690446	3.81548	FALSE	3386.49	0.125622	0.88044	2.91164	1.14241e-05	G2M						Tb427-040013400	G2M
2318	Tb427-040005500	0	0.00990099	1.31275e-06	0.0794716	2.02762	FALSE	4421.66	0.188792	0.819514	2.04782	1.14902e-05	G2M						Tb427-040013900	S
7776	Tb427-110010300	6.4349e-07	0.00990099	1.33043e-06	0.977967	4.03863	FALSE	3573.3	0.135941	0.870362	2.06301	1.16239e-05	G2M						Tb427-040015000	Late G1
6178	Tb427-100009400	0	0.00990099	1.36121e-06	0.171868	4.56726	FALSE	4175.25	0.171798	0.838754	1.88804	1.18821e-05	G2M						Tb427-040015500	S
8582	Tb427-110091700	5.63192e-06	0.00990099	1.45609e-06	0.236642	4.40725	FALSE	1604.1	0.0452345	0.95694	9.80584	1.26875e-05	G2M						Tb427-040015600	Late G1
8122	Tb427-110045500	2.79522e-05	0.00990099	1.46189e-06	0.13343	3.41564	FALSE	5389.14	0.254205	0.769583	1.73591	1.27266e-05	G2M						Tb427-040016600	S
2341	Tb427-040007800	9.17523e-06	0.00990099	1.57676e-06	0.994585	4.68288	FALSE	4845.19	0.214684	0.802565	2.01449	1.36652e-05	G2M						Tb427-040017100	G2M
5497	Tb427-090025900	1.74457e-06	0.00990099	1.68193e-06	0.906547	2.24219	FALSE	3997.17	0.160369	0.848374	1.93851	1.44605e-05	G2M						Tb427-040018500	G2M
2323	Tb427-040006000	6.99846e-07	0.00990099	1.72587e-06	0.728144	4.10548	FALSE	4765.45	0.209616	0.805543	2.4944	1.47857e-05	G2M						Tb427-040018700	S
2519	Tb427-040025600	1.0791e-05	0.00990099	1.82105e-06	0.512369	4.51269	FALSE	6227.63	0.320902	0.724462	1.79218	1.55737e-05	G2M						Tb427-040018800	G2M
6799	Tb427-100072900	7.4028e-06	0.00990099	1.83081e-06	0.758775	4.45378	FALSE	5837.72	0.290112	0.740953	1.88889	1.56433e-05	G2M						Tb427-040019100	S
7368	Tb427-100133500:pseudogene	1.07386e-06	0.00990099	1.89938e-06	0.480051	3.84067	FALSE	3085.69	0.109511	0.896244	3.21486	1.61864e-05	G2M						Tb427-040019200	Late G1
9165	Tb427-110158700	5.17474e-05	0.00990099	1.92275e-06	0.614511	4.27277	FALSE	9522.72	0.74552	0.444114	1.55706	1.63568e-05	G2M						Tb427-040019300	S
4152	Tb427-070048200	0	0.00990099	2.04392e-06	0.765121	4.36605	FALSE	1767.24	0.0517858	0.948236	3.30115	1.73117e-05	G2M						Tb427-040019500	G2M
7468	Tb427-100143900	6.83743e-07	0.00990099	2.06e-06	0.158329	2.84889	FALSE	2780.9	0.0950621	0.907925	2.52901	1.74327e-05	G2M						Tb427-040019600	S
4659	Tb427-080022300	1.15539e-06	0.00990099	2.14599e-06	0.0503853	4.29826	FALSE	4528.95	0.19124	0.828905	2.50937	1.80658e-05	G2M						Tb427-040019700	S
5915	Tb427-090069100	0	0.00990099	2.1991e-06	0.407305	3.18506	FALSE	3265.1	0.118959	0.887311	2.63251	1.84648e-05	G2M						Tb427-040019800	G2M
4213	Tb427-070054300	7.80532e-06	0.00990099	2.5116e-06	0.938609	3.86747	FALSE	3538.34	0.133953	0.87082	1.69052	2.08646e-05	G2M						Tb427-040021000	Late G1
3275	Tb427-050053000	4.39713e-06	0.00990099	2.54683e-06	0.563921	4.08266	FALSE	4805.98	0.213029	0.800504	2.29103	2.10924e-05	G2M						Tb427-040021100	S
710	Tb427-000677400	3.2928e-06	0.00990099	2.57084e-06	0.710789	3.34117	FALSE	4598.88	0.197913	0.816537	2.12604	2.12549e-05	G2M						Tb427-040021200	S
8572	Tb427-110090700	0	0.00990099	2.8632e-06	0.612321	1.00021	FALSE	2701.94	0.0912501	0.912277	2.69856	2.35916e-05	G2M						Tb427-040021400	Early G1
3962	Tb427-070027400	8.12575e-06	0.00990099	3.00178e-06	0.996027	4.34098	FALSE	2226.92	0.0700784	0.9306	2.59962	2.46288e-05	G2M						Tb427-040022300	Late G1
6712	Tb427-100064000	8.64221e-07	0.00990099	3.20967e-06	0.599983	3.86896	FALSE	2742.72	0.0936217	0.907238	1.99922	2.62457e-05	G2M						Tb427-040022400	Late G1
9006	Tb427-110142300	3.67985e-05	0.00990099	3.21507e-06	0.503356	4.06004	FALSE	4424.81	0.186224	0.825928	1.65053	2.62677e-05	G2M						Tb427-040022800	S
5157	Tb427-080073200	4.83616e-05	0.00990099	3.58375e-06	0.783478	4.52937	FALSE	4341.79	0.1801	0.834631	2.28651	2.9157e-05	G2M						Tb427-040022900	S
7406	Tb427-100137300	2.3603e-06	0.00990099	3.76081e-06	0.982501	3.27847	FALSE	3473.29	0.130292	0.874943	2.26103	3.04444e-05	G2M						Tb427-040023000	G2M
4248	Tb427-070057800	6.15772e-05	0.00990099	3.94727e-06	0.333863	4.16927	FALSE	4532.82	0.193458	0.819743	2.3873	3.1821e-05	G2M						Tb427-040023200	S
2451	Tb427-040018800	4.66258e-05	0.00990099	4.14406e-06	0.0339692	4.20463	FALSE	6035.78	0.305342	0.731562	1.90931	3.3341e-05	G2M						Tb427-040023900	G2M
6239	Tb427-100015600	6.88382e-07	0.00990099	4.29688e-06	0.820458	4.08975	FALSE	3907.58	0.15444	0.855474	2.49762	3.4439e-05	G2M						Tb427-040024000	S
6777	Tb427-100070700	1.72739e-06	0.00990099	4.31764e-06	0.263163	3.4606	FALSE	5558.5	0.269383	0.753092	1.67443	3.45483e-05	G2M						Tb427-040024600	Late G1
4524	Tb427-080006400	6.07048e-07	0.00990099	4.38038e-06	0.0204457	4.02501	FALSE	4389.68	0.183992	0.830508	2.30856	3.50213e-05	G2M						Tb427-040025000	Late G1
1563	Tb427-020009100	3.00369e-06	0.00990099	4.5504e-06	0.860429	2.36014	FALSE	4222.91	0.17325	0.838754	1.76343	3.63208e-05	G2M						Tb427-040025200	Late G1
5094	Tb427-080066800	7.42668e-05	0.00990099	4.68046e-06	0.00384313	3.55837	FALSE	6982.03	0.400972	0.650023	1.64107	3.73282e-05	G2M						Tb427-040025600	G2M
3966	Tb427-070027800	2.85928e-06	0.00990099	4.82265e-06	0.939016	4.17051	FALSE	4103.43	0.1674	0.839212	1.80624	3.83676e-05	G2M						Tb427-040026500	Late G1
9260	Tb427-110168200	5.2015e-05	0.00990099	4.8721e-06	0.125924	3.881	FALSE	2666.27	0.0889092	0.915025	3.1573	3.87292e-05	G2M						Tb427-040027000	Late G1
46	Tb427-000015600:pseudogene	7.46634e-06	0.00990099	5.19895e-06	0.0794655	4.76331	FALSE	7109.54	0.406	0.66033	1.62488	4.1226e-05	G2M						Tb427-040028400	S
2585	Tb427-040032200	0.000331878	0.00990099	5.63505e-06	0.319459	4.76071	FALSE	2059.82	0.0625251	0.939304	4.20232	4.4466e-05	G2M						Tb427-040028500	S
8646	Tb427-110099200	5.24652e-06	0.00990099	5.73097e-06	0.61492	3.89634	FALSE	3472.3	0.130599	0.873339	1.79767	4.51494e-05	G2M						Tb427-040028600	G2M
9374	Tb427-110179800	1.40357e-06	0.00990099	6.30891e-06	0.682083	3.68402	FALSE	5350.73	0.251471	0.772332	1.51458	4.94215e-05	G2M						Tb427-040028900	S
8867	Tb427-110128000	4.85258e-05	0.00990099	6.58028e-06	0.52583	3.42703	FALSE	6497.45	0.347925	0.696519	1.53003	5.14641e-05	G2M						Tb427-040029700	S
1954	Tb427-030020700	1.11201e-05	0.00990099	6.64344e-06	0.362299	3.42589	FALSE	4970.98	0.222831	0.79661	2.06703	5.19162e-05	G2M						Tb427-040029800	G2M
5010	Tb427-080058400	0.000245346	0.00990099	6.67497e-06	0.234488	3.98222	FALSE	4508.93	0.190375	0.826157	1.91681	5.21206e-05	G2M						Tb427-040030200	Late G1
5000	Tb427-080057400	0	0.00990099	6.7233e-06	0.865583	3.58332	FALSE	2255.6	0.0716847	0.92831	4.03724	5.24558e-05	G2M						Tb427-040030500:pseudogene	S
9034	Tb427-110145400	0.000178867	0.00990099	6.81723e-06	0.139229	3.42996	FALSE	3629.41	0.138144	0.868301	1.53995	5.31032e-05	G2M						Tb427-040030600	Late G1
6654	Tb427-100058100	5.16907e-07	0.00990099	7.44813e-06	0.507249	1.0003	FALSE	4140.56	0.169555	0.837609	1.89142	5.78085e-05	G2M						Tb427-040030800	S
5307	Tb427-080088900	6.3947e-06	0.00990099	8.52733e-06	0.914627	3.19417	FALSE	5890.16	0.296505	0.731562	1.77549	6.56855e-05	G2M						Tb427-040031100	G2M
3210	Tb427-050044900	0	0.00990099	8.78825e-06	0.390972	3.97585	FALSE	5302.75	0.246489	0.781035	1.94867	6.75465e-05	G2M						Tb427-040031400	S
5633	Tb427-090039800	0.000111872	0.00990099	8.8137e-06	0.293257	3.5943	FALSE	4231.77	0.17431	0.835547	2.01045	6.76764e-05	G2M						Tb427-040031500	S
1438	Tb427-010023300	3.36987e-06	0.00990099	9.09748e-06	0.371146	1.63427	FALSE	4688.23	0.204373	0.809208	1.74988	6.96899e-05	G2M						Tb427-040031600	G2M
1882	Tb427-030013500	0.00066208	0.00990099	9.43243e-06	0.566814	4.21152	FALSE	6129.09	0.314789	0.720339	1.68304	7.20281e-05	G2M						Tb427-040031900	Late G1
2549	Tb427-040028600	1.21253e-06	0.00990099	9.6504e-06	0.353789	3.77449	FALSE	3118.07	0.111685	0.892121	1.86101	7.3346e-05	G2M						Tb427-040032200	G2M
4917	Tb427-080048400	2.97878e-07	0.00990099	1.01713e-05	0.759858	3.49238	FALSE	1866.39	0.0552989	0.945259	4.60985	7.68236e-05	G2M						Tb427-040032400	G2M
8960	Tb427-110137700	7.6066e-06	0.00990099	1.19744e-05	0.930846	4.27812	FALSE	1939.76	0.0581401	0.94251	3.64749	8.94667e-05	G2M						Tb427-040033700	Late G1
6692	Tb427-100062000	7.82094e-05	0.00990099	1.29172e-05	0.857385	3.19054	FALSE	3313.26	0.121451	0.88273	1.98393	9.59197e-05	G2M						Tb427-040033800	Late G1
2188	Tb427-030047400	0.000110505	0.00990099	1.32445e-05	0.649531	3.7826	FALSE	1992.28	0.0601348	0.939762	2.13866	9.81249e-05	G2M						Tb427-040036000	Late G1
3057	Tb427-050029600	1.95317e-06	0.00990099	1.33374e-05	0.278304	3.80151	FALSE	2913.69	0.101773	0.899679	2.64191	9.87375e-05	G2M						Tb427-040036800	G2M
6729	Tb427-100065700	1.77897e-05	0.00990099	1.46642e-05	0.544532	3.44171	FALSE	3912.05	0.15451	0.8541	2.18344	0.000107574	G2M						Tb427-040037000	Late G1
3879	Tb427-070018300	1.53069e-06	0.00990099	1.4849e-05	0.754378	2.82962	FALSE	2305.86	0.0733242	0.927852	2.68796	0.000108848	G2M						Tb427-040037200	G2M
2493	Tb427-040023000	0.000619913	0.00990099	1.53567e-05	0.503763	4.62729	FALSE	7133.82	0.412525	0.64842	1.73821	0.000112314	G2M						Tb427-040037500	Late G1
4517	Tb427-080005700	1.99964e-05	0.00990099	1.56128e-05	0.57636	2.59736	FALSE	3422.65	0.127087	0.878149	1.95091	0.000114102	G2M						Tb427-040037600	G2M
7454	Tb427-100142500	4.04929e-05	0.00990099	1.57933e-05	0.889679	4.23178	FALSE	4884.43	0.217196	0.800733	1.95824	0.000115334	G2M						Tb427-040039800	G2M
6706	Tb427-100063400	1.57623e-06	0.00990099	1.8845e-05	0.321044	2.4722	FALSE	2438.88	0.0791342	0.923042	2.7387	0.000136184	G2M						Tb427-040040200	S
8268	Tb427-110060300	9.06609e-06	0.00990099	1.88982e-05	0.549635	3.8541	FALSE	8614.91	0.587985	0.543518	1.68806	0.000136466	G2M						Tb427-040041000:pseudogene	G2M
7124	Tb427-100107300	5.9791e-05	0.00990099	1.97907e-05	0.732111	3.68779	FALSE	7321.22	0.430906	0.637884	1.73062	0.000142593	G2M						Tb427-040042400	S
9200	Tb427-110162200	0.00056092	0.00990099	2.07605e-05	0.237641	4.41198	FALSE	6491.12	0.347378	0.698122	1.74066	0.000149137	G2M						Tb427-040043100	G2M
2349	Tb427-040008600	0.000542132	0.00990099	2.10677e-05	0.922915	4.36865	FALSE	3790.95	0.146921	0.862116	2.04157	0.000150897	G2M						Tb427-040043200	Late G1
7371	Tb427-100133800	1.34319e-06	0.00990099	2.47323e-05	0.61565	3.73027	FALSE	2988.74	0.104859	0.899679	2.59222	0.000175076	G2M						Tb427-040043300	G2M
6191	Tb427-100010700	1.05705e-05	0.00990099	2.4767e-05	0.532598	4.57772	FALSE	4533.93	0.193956	0.818827	1.94256	0.000175193	G2M						Tb427-040043400	S
1779	Tb427-020031300	8.99982e-07	0.00990099	2.52362e-05	0.973275	2.2397	FALSE	3282.12	0.120272	0.883417	2.27439	0.000178252	G2M						Tb427-040044000	S
7351	Tb427-100131700	0.00352425	0.00990099	2.71891e-05	0.446863	4.08569	FALSE	3474.54	0.130052	0.872881	2.06219	0.000190934	G2M						Tb427-040044500	Late G1
6733	Tb427-100066100	0.00020881	0.00990099	2.79867e-05	0.246198	3.73876	FALSE	3377.39	0.124048	0.88273	2.22185	0.000196251	G2M						Tb427-040044600	G2M
2343	Tb427-040008000	1.95703e-05	0.00990099	2.92529e-05	0.380117	4.50907	FALSE	3869.13	0.152095	0.857077	1.99547	0.000203657	G2M						Tb427-040046700	G2M
6164	Tb427-100008000	8.2637e-07	0.00990099	2.93051e-05	0.421528	1.00023	FALSE	2201.24	0.0688507	0.932203	2.766	0.0002038	G2M						Tb427-040046800:pseudogene	G2M
6597	Tb427-100052400	1.62282e-05	0.00990099	2.96013e-05	0.544728	4.05168	FALSE	3447.89	0.127898	0.88044	2.94264	0.00020564	G2M						Tb427-040047100	Late G1
6485	Tb427-100041100	4.23793e-05	0.00990099	3.14056e-05	0.181635	1.19915	FALSE	5182.28	0.238228	0.782639	1.56154	0.000217086	G2M						Tb427-040047900	S
3710	Tb427-060052300	7.20785e-05	0.00990099	3.25132e-05	0.984674	2.97951	FALSE	4265.89	0.17662	0.831654	1.78825	0.000223785	G2M						Tb427-040048400	S
6972	Tb427-100092100	2.21023e-05	0.00990099	3.47273e-05	0.167437	3.80821	FALSE	4157.72	0.170326	0.837151	1.82	0.000238011	G2M						Tb427-040050400	G2M
3101	Tb427-050034000	3.2445e-06	0.00990099	3.74575e-05	0.105723	3.26679	FALSE	2449.77	0.0791261	0.925103	3.08189	0.000255279	G2M						Tb427-040050500	G2M
1951	Tb427-030020400	0.000215048	0.00990099	3.86484e-05	0.12498	2.81961	FALSE	3279.19	0.118435	0.889372	1.94197	0.000263211	G2M						Tb427-040050900	S
7812	Tb427-110014000	6.2034e-05	0.00990099	3.8832e-05	0.999695	2.39459	FALSE	2070.62	0.0630916	0.937929	2.34526	0.000264021	G2M						Tb427-040051300:pseudogene	S
3914	Tb427-070022000	1.03233e-05	0.00990099	3.9289e-05	0.221481	1.00007	FALSE	2863.76	0.0983618	0.905176	2.04392	0.000266824	G2M						Tb427-040051900	Late G1
4788	Tb427-080035400	0.000398616	0.00990099	3.97543e-05	0.725909	3.71064	FALSE	4683.1	0.201587	0.816766	1.78014	0.000269606	G2M						Tb427-040052400	G2M
7296	Tb427-100126200	3.08096e-05	0.00990099	4.26353e-05	0.559982	2.86231	FALSE	4069.2	0.164122	0.845167	1.5904	0.000288137	G2M						Tb427-040052700	Early G1
3029	Tb427-050026400:pseudogene	0.000343217	0.00990099	4.38388e-05	0.165504	3.80531	FALSE	7211.87	0.424033	0.633761	1.68375	0.000295858	G2M						Tb427-040052800	Early G1
6190	Tb427-100010600	0.000234601	0.00990099	4.7886e-05	0.890143	3.4507	FALSE	5112.56	0.232943	0.78699	1.57976	0.000322052	G2M						Tb427-040053100	Early G1
5852	Tb427-090062400	0.000310722	0.00990099	4.93618e-05	0.143821	4.38066	FALSE	5588.13	0.268054	0.761567	1.91913	0.000331517	G2M						Tb427-040053400	Late G1
2461	Tb427-040019800	9.09213e-06	0.00990099	5.00303e-05	0.096089	2.94825	FALSE	2498.13	0.0815755	0.919835	2.68588	0.000335774	G2M						Tb427-040054500	S
7501	Tb427-100147400	3.94385e-05	0.00990099	5.0529e-05	0.140762	4.41405	FALSE	3420.79	0.127415	0.876775	1.81248	0.000338887	G2M						Tb427-040054600	Late G1
7011	Tb427-100096000	2.72495e-06	0.00990099	5.33362e-05	0.514511	1.00014	FALSE	4560.21	0.196276	0.813788	1.70215	0.000356727	G2M						Tb427-040054700	Early G1
2635	Tb427-040037600	2.29854e-05	0.00990099	5.3502e-05	0.119345	3.70196	FALSE	5293.23	0.247122	0.775767	1.97101	0.00035759	G2M						Tb427-040055200	Late G1
8790	Tb427-110120300	2.42129e-05	0.00990099	5.38479e-05	0.0194992	2.83773	FALSE	2104.24	0.0643274	0.938158	2.70814	0.000359654	G2M						Tb427-040056300	S
3780	Tb427-070008200	4.47011e-05	0.00990099	5.50249e-05	0.556972	4.39809	FALSE	2757.71	0.0933275	0.910215	2.33967	0.000366757	G2M						Tb427-040056500	S
5600	Tb427-090036300	0.000116427	0.00990099	5.6019e-05	0.935061	4.11329	FALSE	4508.51	0.191321	0.821805	1.77372	0.000372104	G2M						Tb427-040056700	S
8860	Tb427-110127300	1.62266e-06	0.00990099	6.06439e-05	0.4861	4.03462	FALSE	2322.53	0.0739668	0.928081	2.69862	0.000400085	G2M						Tb427-040057100	Late G1
1738	Tb427-020027200	2.85767e-05	0.00990099	6.19771e-05	0.47407	1.96039	FALSE	2146.37	0.0663341	0.934265	2.41232	0.000408325	G2M						Tb427-050005700	Early G1
3984	Tb427-070029600	0.000332282	0.00990099	6.44962e-05	0.267085	3.0263	FALSE	6164.6	0.319735	0.712781	1.60222	0.000423483	G2M						Tb427-050006200	G2M
8717	Tb427-110106500	8.97561e-07	0.00990099	6.51235e-05	0.0111932	1.00094	FALSE	2436.26	0.0787545	0.923042	2.43783	0.000427024	G2M						Tb427-050006700	Early G1
2018	Tb427-030028400	3.51794e-05	0.00990099	6.92778e-05	0.76668	3.5567	FALSE	3033.51	0.106824	0.896473	2.67634	0.000452428	G2M						Tb427-050007800	Late G1
1487	Tb427-010029000	2.42551e-05	0.00990099	6.92612e-05	0.307072	4.347	FALSE	4578.92	0.196262	0.81814	1.66109	0.000452428	G2M						Tb427-050008300	Early G1
1388	Tb427-010016900	3.80545e-05	0.00990099	7.14357e-05	0.480509	2.71245	FALSE	3943.33	0.156689	0.850664	1.82118	0.00046558	G2M						Tb427-050008400	G2M
7082	Tb427-100103100	3.62235e-07	0.00990099	7.34159e-05	0.526307	3.18332	FALSE	4516.74	0.192666	0.821347	1.77503	0.000475928	G2M						Tb427-050009300	S
8776	Tb427-110118900	3.25209e-07	0.00990099	7.36265e-05	0.769987	1.00032	FALSE	2865.34	0.0992552	0.90197	2.28656	0.000476974	G2M						Tb427-050010000	Late G1
3860	Tb427-070016300	5.59965e-05	0.00990099	7.55181e-05	0.18268	2.09219	FALSE	5230.17	0.244624	0.769583	1.51805	0.000488249	G2M						Tb427-050010200	Late G1
2397	Tb427-040013400	0.000284774	0.00990099	7.59211e-05	0.81769	2.88248	FALSE	3796.57	0.148267	0.857077	1.68365	0.000490528	G2M						Tb427-050010800	S
4705	Tb427-080027000	6.04877e-05	0.00990099	7.64881e-05	0.0395929	1.00043	FALSE	3918.25	0.155132	0.85158	1.66967	0.000493863	G2M						Tb427-050011800	G2M
6732	Tb427-100066000	9.83574e-06	0.00990099	7.74396e-05	0.473991	3.41071	FALSE	3799.62	0.14767	0.861658	2.42715	0.000499341	G2M						Tb427-050011900	S
8034	Tb427-110036400	0.00258359	0.00990099	7.90811e-05	0.997071	3.35135	FALSE	6265.34	0.330289	0.701099	1.53235	0.000508236	G2M						Tb427-050012400	Late G1
9196	Tb427-110161800	2.05521e-05	0.00990099	7.90699e-05	0.855379	4.3671	FALSE	3399.11	0.126082	0.879294	2.44411	0.000508236	G2M						Tb427-050012700	S
7191	Tb427-100115200	0.000440294	0.00990099	7.96763e-05	0.424548	1.42787	FALSE	4574.1	0.196159	0.816079	1.53744	0.000511608	G2M						Tb427-050012800	S
5161	Tb427-080073600	0.000136349	0.00990099	7.97113e-05	0.333179	2.96477	FALSE	7012.64	0.40188	0.652084	1.52191	0.000511608	G2M						Tb427-050013100	Late G1
2888	Tb427-050011800	0.000196885	0.00990099	8.31071e-05	0.487812	4.07741	FALSE	5695.78	0.278588	0.749198	1.72561	0.000531995	G2M						Tb427-050013300	S
4124	Tb427-070045400	0.000127818	0.00990099	8.45921e-05	0.724687	4.01325	FALSE	3445.45	0.128425	0.876317	1.83195	0.000540075	G2M						Tb427-050013600	G2M
3951	Tb427-070026300	3.9376e-05	0.00990099	8.51451e-05	0.497703	4.02069	FALSE	5863.87	0.293843	0.734082	1.97851	0.000542891	G2M						Tb427-050013700	Late G1
5458	Tb427-090021600	1.31333e-06	0.00990099	8.60689e-05	0.0110297	1.00068	FALSE	1796.03	0.0524077	0.948007	3.11539	0.000548421	G2M						Tb427-050015100	Late G1
8113	Tb427-110044600	4.00106e-05	0.00990099	8.79533e-05	0.25061	1.71208	FALSE	4182.78	0.170179	0.841732	1.73804	0.00056006	G2M						Tb427-050016100	Late G1
1795	Tb427-020032900	2.86965e-05	0.00990099	8.84062e-05	0.787162	4.48047	FALSE	1429.03	0.0388169	0.962208	12.367	0.000562574	G2M						Tb427-050016400	Late G1
8801	Tb427-110121400	0.000132105	0.00990099	8.85039e-05	0.498285	4.18988	FALSE	2705.77	0.0907251	0.912964	2.07207	0.000562674	G2M						Tb427-050016600	Late G1
34	Tb427-000014300:pseudogene	0.00025458	0.00990099	9.08676e-05	0.755857	4.21417	FALSE	3188.4	0.114705	0.889601	2.12203	0.000576347	G2M						Tb427-050017000	S
4544	Tb427-080008400	3.99937e-06	0.00990099	9.33266e-05	0.707383	1.00008	FALSE	4634.25	0.201102	0.810353	1.67998	0.000590784	G2M						Tb427-050018300	Early G1
5074	Tb427-080064800	5.56606e-06	0.00990099	9.44806e-05	0.631743	1.00019	FALSE	3139.53	0.112053	0.892579	1.99647	0.000597699	G2M						Tb427-050021300	S
8994	Tb427-110141100	9.61957e-05	0.00990099	9.52456e-05	0.780322	2.5375	FALSE	4278.83	0.177703	0.830279	1.74279	0.000602146	G2M						Tb427-050022200	S
8787	Tb427-110120000	2.50601e-06	0.00990099	9.58069e-05	0.752428	3.4633	FALSE	3612.09	0.137353	0.870591	2.18654	0.0006053	G2M						Tb427-050022300	Early G1
6773	Tb427-100070300	-1.72353e-07	0.00990099	9.80488e-05	0.696993	1.00023	FALSE	2798.69	0.0960837	0.905405	2.38049	0.000618658	G2M						Tb427-050022600	S
4266	Tb427-070059600	8.5914e-05	0.00990099	9.90339e-05	0.108448	2.62789	FALSE	5061.59	0.229104	0.791571	1.63908	0.000624062	G2M						Tb427-050022700	S
6669	Tb427-100059600	0.000120888	0.00990099	0.000101628	0.152982	3.80248	FALSE	3247.77	0.117789	0.886853	2.56332	0.000639574	G2M						Tb427-050025100	G2M
3848	Tb427-070015100:pseudogene	0.000231527	0.00990099	0.000103588	0.232365	3.56948	FALSE	2444.07	0.0789689	0.922584	2.82352	0.000650645	G2M						Tb427-050025200	G2M
3624	Tb427-060043100	2.84129e-05	0.00990099	0.000109776	0.365457	2.4702	FALSE	3594.34	0.136226	0.87082	1.77582	0.000687729	G2M						Tb427-050025300	G2M
3269	Tb427-050052400	9.0554e-06	0.00990099	0.000110944	0.228094	4.58103	FALSE	4258.45	0.175855	0.835776	1.93092	0.000693706	G2M						Tb427-050025400	G2M
2718	Tb427-040046700	0.00622978	0.00990099	0.000118296	0.380677	3.20839	FALSE	3256.34	0.117744	0.886166	2.04826	0.000735877	G2M						Tb427-050025500	Late G1
5396	Tb427-090014900	0.00168032	0.00990099	0.000118884	0.536007	3.40409	FALSE	2309.87	0.0727142	0.929455	2.60393	0.000738519	G2M						Tb427-050025600	G2M
6490	Tb427-100041600	0.00178502	0.00990099	0.000118949	0.917903	4.68053	FALSE	2890.97	0.0996687	0.903115	2.3063	0.000738519	G2M						Tb427-050025700	G2M
4692	Tb427-080025700	2.14512e-05	0.00990099	0.000119788	0.773225	2.95831	FALSE	4294.16	0.17817	0.831425	1.83986	0.000742779	G2M						Tb427-050025900	Late G1
4616	Tb427-080017700	0.000221402	0.00990099	0.000121247	0.560956	4.12551	FALSE	2947.06	0.102757	0.899679	2.05179	0.000750861	G2M						Tb427-050026000	Late G1
1600	Tb427-020013000	3.51947e-05	0.00990099	0.000127102	0.0995773	1.50161	FALSE	3776.37	0.146825	0.860284	1.79773	0.000784617	G2M						Tb427-050026400:pseudogene	G2M
6304	Tb427-100022100	4.45746e-06	0.00990099	0.000129532	0.605437	1.00012	FALSE	3835.02	0.150632	0.855703	1.82906	0.000797587	G2M						Tb427-050026800	Late G1
2364	Tb427-040010100	0.00111894	0.00990099	0.000135561	0.85641	3.65468	FALSE	1823	0.0529765	0.948236	3.41896	0.000830495	G2M						Tb427-050027300	S
8909	Tb427-110132500	0.00156853	0.00990099	0.000135783	0.674669	3.59823	FALSE	4295.68	0.176974	0.835547	1.56187	0.000831327	G2M						Tb427-050028900	S
9378	Tb427-110180200	0.000104795	0.00990099	0.000139399	0.646713	4.18595	FALSE	1501.13	0.0413243	0.960147	6.71294	0.000852393	G2M						Tb427-050029200	S
5393	Tb427-090014600	1.87369e-06	0.00990099	0.000140024	0.925355	1.47758	FALSE	2752.98	0.0933978	0.909528	2.36847	0.000855135	G2M						Tb427-050029500	S
8129	Tb427-110046200	0.000402381	0.00990099	0.000143844	0.30271	4.07779	FALSE	3804.9	0.14695	0.864865	2.44825	0.000876243	G2M						Tb427-050029600	G2M
4853	Tb427-080042000:pseudogene	0.000116516	0.00990099	0.000146712	0.746084	2.00198	FALSE	3265.98	0.118603	0.88525	1.80107	0.000891486	G2M						Tb427-050030300	Late G1
1364	Tb427-010014400	0.000541642	0.00990099	0.000148536	0.415393	4.32098	FALSE	5656.18	0.276211	0.748969	1.78353	0.000900879	G2M						Tb427-050030800	S
4067	Tb427-070039700	0.000140501	0.00990099	0.000149034	0.830417	4.39654	FALSE	4359.62	0.182917	0.825928	2.46437	0.000903332	G2M						Tb427-050031400	Late G1
2303	Tb427-030059300	9.77543e-05	0.00990099	0.000156949	0.691269	3.42723	FALSE	4459.43	0.189018	0.822034	1.78054	0.000947753	G2M						Tb427-050031800	Late G1
3017	Tb427-050025200	0.000169839	0.00990099	0.000159675	0.0838782	2.7266	FALSE	3068.21	0.108571	0.894411	1.84571	0.000963616	G2M						Tb427-050032100	G2M
4045	Tb427-070037500	2.28023e-05	0.00990099	0.000159846	0.954605	2.65545	FALSE	4973.86	0.22311	0.795465	1.69123	0.000964046	G2M						Tb427-050033200	S
5706	Tb427-090047400	2.38454e-05	0.00990099	0.000162126	0.356919	3.69291	FALSE	2172.8	0.0674097	0.934265	2.05867	0.000975977	G2M						Tb427-050033400	Late G1
4780	Tb427-080034600	1.42706e-05	0.00990099	0.00016238	0.161222	1.00003	FALSE	2491.56	0.0812801	0.919606	2.16748	0.000976901	G2M						Tb427-050033700	Late G1
2667	Tb427-040041000:pseudogene	0.00225198	0.00990099	0.000163946	0.592062	3.91552	FALSE	4795.1	0.21171	0.800275	2.09811	0.000983273	G2M						Tb427-050034000	G2M
7308	Tb427-100127400	4.87491e-05	0.00990099	0.000170779	0.520972	3.42528	FALSE	3831.86	0.149319	0.860971	2.30273	0.00102173	G2M						Tb427-050034300	Late G1
4448	Tb427-070078900	0.000627902	0.00990099	0.000173449	0.0529001	4.28776	FALSE	4136.68	0.16796	0.841503	1.65958	0.00103642	G2M						Tb427-050034400	Late G1
9444	Tb427-110186900	0.000162582	0.00990099	0.000174526	0.935164	3.49765	FALSE	2488.21	0.0805939	0.9235	3.05914	0.00104221	G2M						Tb427-050035000	S
5037	Tb427-080061100	2.95428e-05	0.00990099	0.000183625	0.297818	3.69556	FALSE	4565.2	0.195312	0.819056	1.60063	0.00109385	G2M						Tb427-050035200	G2M
7054	Tb427-100100300	0.000152717	0.00990099	0.000184271	0.699971	3.67495	FALSE	4897.77	0.216912	0.803023	2.08504	0.00109635	G2M						Tb427-050035500	S
1788	Tb427-020032200	0.0022198	0.00990099	0.000187847	0.696171	4.60508	FALSE	3805.11	0.147566	0.861429	1.82718	0.00111489	G2M						Tb427-050035900	Late G1
5924	Tb427-090070000	0.000439896	0.00990099	0.000191479	0.925449	3.29093	FALSE	4231.03	0.172869	0.840128	1.96189	0.00113368	G2M						Tb427-050036000	S
5271	Tb427-080085100	1.38809e-05	0.00990099	0.000191732	0.6437	1.00009	FALSE	3341.28	0.12245	0.882959	1.87269	0.00113379	G2M						Tb427-050036200	Late G1
5234	Tb427-080080900	0.000641707	0.00990099	0.00019801	0.960524	3.71005	FALSE	1645.76	0.0464437	0.95694	4.29136	0.00116776	G2M						Tb427-050036400	S
7584	Tb427-100155900	0.000174467	0.00990099	0.000204792	0.963614	4.13573	FALSE	7338.06	0.437127	0.625744	1.67371	0.00120441	G2M						Tb427-050036800	S
3082	Tb427-050032100	0.0028907	0.00990099	0.000225227	0.740393	4.25457	FALSE	7313.59	0.431187	0.635364	1.63186	0.00131423	G2M						Tb427-050037500	S
5810	Tb427-090057800	0.000253955	0.00990099	0.00022956	0.44129	4.2703	FALSE	2714.92	0.0911435	0.912277	3.16328	0.00133791	G2M						Tb427-050037700	Early G1
5862	Tb427-090063400	0.0026519	0.00990099	0.000243044	0.749943	2.95754	FALSE	5013.12	0.226941	0.787678	1.50267	0.00141309	G2M						Tb427-050038400	S
4697	Tb427-080026200	0.00342486	0.00990099	0.000250651	0.977313	4.1406	FALSE	5085.18	0.229753	0.792258	1.66307	0.00145384	G2M						Tb427-050039100	Late G1
5851	Tb427-090062300	0.00113669	0.00990099	0.000254557	0.199155	3.19693	FALSE	2713.95	0.0904501	0.915483	2.12173	0.00147473	G2M						Tb427-050039300	S
2655	Tb427-040039800	0.0012772	0.00990099	0.000277438	0.615651	3.38998	FALSE	3473.42	0.129283	0.876775	1.94203	0.00159774	G2M						Tb427-050039400	G2M
2329	Tb427-040006600	9.61829e-05	0.00990099	0.000279045	0.828016	4.21081	FALSE	5887.14	0.293837	0.738204	1.97641	0.00160604	G2M						Tb427-050039600	S
2043	Tb427-030030900	5.67826e-05	0.00990099	0.000286571	0.428822	3.22912	FALSE	4490.46	0.189591	0.825928	1.80322	0.00164642	G2M						Tb427-050040300	S
4251	Tb427-070058100	0.000337082	0.00990099	0.000293979	0.430379	2.96607	FALSE	2812.15	0.0955839	0.907925	2.18203	0.00168799	G2M						Tb427-050040500	S
9027	Tb427-110144400	0.00201417	0.00990099	0.000299993	0.555113	3.13144	FALSE	4459.68	0.188256	0.823637	1.74382	0.00172048	G2M						Tb427-050041100	Late G1
1508	Tb427-010031500	0.000360267	0.00990099	0.000301804	0.395952	3.32873	FALSE	1961.97	0.0584417	0.943656	2.94449	0.00172882	G2M						Tb427-050041400	Late G1
4896	Tb427-080046300	0.000195848	0.00990099	0.000305781	0.230459	2.95363	FALSE	5073.74	0.228892	0.79432	1.58371	0.00174954	G2M						Tb427-050041600	Late G1
4241	Tb427-070057100	0.000404487	0.00990099	0.000306056	0.796858	3.14191	FALSE	3025.98	0.106441	0.896244	2.07155	0.00175008	G2M						Tb427-050041800	S
5937	Tb427-090071500	0.000265246	0.00990099	0.000311559	0.749908	3.30775	FALSE	3615.46	0.137676	0.867613	1.57695	0.0017784	G2M						Tb427-050041900	S
9190	Tb427-110161200	0.00220888	0.00990099	0.000312385	0.945251	3.44557	FALSE	6043.44	0.307662	0.725149	1.61496	0.00178206	G2M						Tb427-050042800	S
8568	Tb427-110090300	0.000786581	0.00990099	0.000317581	0.662321	3.25409	FALSE	3781.89	0.146099	0.863491	2.07537	0.00180851	G2M						Tb427-050043300	S
1639	Tb427-020017200	2.48603e-05	0.00990099	0.000320345	0.0394257	2.26956	FALSE	2958.61	0.102708	0.901741	2.03863	0.00182318	G2M						Tb427-050043800	Late G1
7525	Tb427-100150000	0.000171294	0.00990099	0.000324653	0.590847	3.57788	FALSE	4078.61	0.164393	0.845396	2.05387	0.00184122	G2M						Tb427-050044300	S
8414	Tb427-110074900	2.63082e-05	0.00990099	0.000327192	0.393789	1.00025	FALSE	5485.76	0.262866	0.75836	1.51015	0.00185345	G2M						Tb427-050044700	Late G1
8489	Tb427-110082400	0.000212436	0.00990099	0.000332665	0.708371	2.7276	FALSE	5254.62	0.243561	0.777829	1.60765	0.00188225	G2M						Tb427-050044900	G2M
2034	Tb427-030030000	0.00114864	0.00990099	0.000348389	0.329292	3.03426	FALSE	1725.57	0.0491496	0.952359	2.96625	0.00196663	G2M						Tb427-050046400	G2M
7334	Tb427-100130000	0.000533094	0.00990099	0.00034933	0.626599	3.84067	FALSE	6550.3	0.353374	0.692396	1.71231	0.0019708	G2M						Tb427-050046900	Late G1
4562	Tb427-080010200:pseudogene	0.000432478	0.00990099	0.000349889	0.235752	2.99266	FALSE	2908.88	0.100476	0.902199	2.07314	0.0019728	G2M						Tb427-050048300	S
9192	Tb427-110161400	1.68214e-05	0.00990099	0.000352018	0.974225	3.61109	FALSE	2554.26	0.0839641	0.918919	3.37755	0.00198135	G2M						Tb427-050048400	S
4271	Tb427-070060100	0.000137618	0.00990099	0.000355501	0.868019	3.35791	FALSE	2787.05	0.0944267	0.909528	2.57317	0.00199979	G2M						Tb427-050050200:pseudogene	S
8698	Tb427-110104600	0.000277525	0.00990099	0.000360408	0.996574	2.46915	FALSE	5439.63	0.25967	0.759276	1.53505	0.00202387	G2M						Tb427-050050900	Late G1
8935	Tb427-110135100	9.79703e-05	0.00990099	0.000362901	0.971971	3.27231	FALSE	5112.71	0.232394	0.790197	1.58682	0.00203552	G2M						Tb427-050051200	S
6348	Tb427-100026900	5.60796e-05	0.00990099	0.000370237	0.968908	3.52029	FALSE	5279.71	0.246273	0.774622	1.96336	0.00207547	G2M						Tb427-050051300	S
7550	Tb427-100152500	0.000201532	0.00990099	0.000383119	0.660628	3.43082	FALSE	4535.2	0.193774	0.818598	1.97591	0.00213903	G2M						Tb427-050051400	S
3609	Tb427-060041600	0.000959725	0.00990099	0.000383528	0.633792	3.52687	FALSE	5085.41	0.232877	0.78218	1.80289	0.00214008	G2M						Tb427-050051600	Late G1
1642	Tb427-020017500	0.00314293	0.00990099	0.000393459	0.10018	4.38821	FALSE	5717.19	0.280155	0.746679	1.81426	0.00219045	G2M						Tb427-050051800	S
3019	Tb427-050025400	0.00144328	0.00990099	0.000398117	0.112187	3.42103	FALSE	4325.15	0.179324	0.832112	1.78427	0.00221257	G2M						Tb427-050052100	Late G1
8977	Tb427-110139400	0.00015784	0.00990099	0.000399568	0.264133	3.30728	FALSE	3193.65	0.114497	0.891205	2.16402	0.00221866	G2M						Tb427-050052200	G2M
2311	Tb427-030060100	0.00174443	0.00990099	0.000403179	0.0158772	2.86437	FALSE	3079.58	0.108138	0.898305	1.64367	0.00223686	G2M						Tb427-050052300	Late G1
2031	Tb427-030029700	4.71996e-05	0.00990099	0.000409024	0.923177	3.13982	FALSE	2642.94	0.0875668	0.917316	2.35889	0.00226281	G2M						Tb427-050052400	G2M
3599	Tb427-060040600	1.90835e-05	0.00990099	0.00041243	0.933513	1.00014	FALSE	3432.43	0.128206	0.874027	1.82698	0.00227776	G2M						Tb427-050052600	S
8725	Tb427-110107300	0.0164366	0.00990099	0.000423808	0.993816	3.85451	FALSE	4135.32	0.167738	0.840815	2.05339	0.00233263	G2M						Tb427-050053000	G2M
9361	Tb427-110178500	0.000588309	0.00990099	0.000434059	0.854616	3.3115	FALSE	3548.36	0.133199	0.874027	1.81156	0.00238573	G2M						Tb427-050053100	Late G1
7891	Tb427-110022000	0.000150265	0.00990099	0.000460758	0.612803	1.00012	FALSE	4364.79	0.182382	0.82776	1.56248	0.00252454	G2M						Tb427-050053500	S
4424	Tb427-070076500	0.00108819	0.00990099	0.000500591	0.132711	4.14916	FALSE	4732.57	0.206072	0.809666	2.28691	0.00272738	G2M						Tb427-060007900	Late G1
3969	Tb427-070028100	0.000186534	0.00990099	0.000502489	0.447262	2.57824	FALSE	3483.18	0.130551	0.873339	1.81081	0.00273464	G2M						Tb427-060008300	S
3318	Tb427-060009400:pseudogene	0.000444613	0.00990099	0.000504115	0.166542	3.99396	FALSE	5379.4	0.253446	0.768896	1.59297	0.00274042	G2M						Tb427-060008400	S
8351	Tb427-110068600	0.0019634	0.00990099	0.000511738	0.414017	4.18998	FALSE	3776.78	0.146189	0.861658	2.28254	0.00277718	G2M						Tb427-060009100	S
2209	Tb427-030049500	0.000167241	0.00990099	0.000514188	0.882129	1.00008	FALSE	4385.78	0.18428	0.82524	1.55374	0.00278471	G2M						Tb427-060009400:pseudogene	G2M
2046	Tb427-030031200	0.0150814	0.00990099	0.000539032	0.336002	4.70629	FALSE	7674.51	0.473873	0.603298	1.61919	0.00290741	G2M						Tb427-060009600	S
2230	Tb427-030052000	0.000202228	0.00990099	0.000544997	0.446641	1.00015	FALSE	4014.89	0.16058	0.847687	1.59417	0.00292981	G2M						Tb427-060011600	Late G1
1402	Tb427-010019600	0.000746291	0.00990099	0.00054748	0.143763	3.67329	FALSE	1477.03	0.0402323	0.961292	4.64295	0.00294153	G2M						Tb427-060011800	S
3397	Tb427-060017700	1.8897e-05	0.00990099	0.000554757	0.0977543	1.00013	FALSE	2956.35	0.103088	0.89945	1.96635	0.00297568	G2M						Tb427-060012400	Late G1
2906	Tb427-050013600	0.00022764	0.00990099	0.000569308	0.922124	4.02127	FALSE	2780.62	0.0942978	0.908841	2.38989	0.00304867	G2M						Tb427-060013000	Late G1
7316	Tb427-100128200	0.00394725	0.00990099	0.000571436	0.0246948	3.82366	FALSE	2357.99	0.0752218	0.924645	1.98304	0.00305838	G2M						Tb427-060013300	Early G1
9160	Tb427-110158200	5.13014e-05	0.00990099	0.000576063	0.872205	2.31647	FALSE	3015.35	0.10583	0.897847	1.9038	0.00308145	G2M						Tb427-060013500	Early G1
7288	Tb427-100125400	0.00023026	0.00990099	0.000580964	0.966628	1.65538	FALSE	3693.38	0.141921	0.864178	1.7041	0.00310253	G2M						Tb427-060014200	Late G1
7533	Tb427-100150800	0.00164258	0.00990099	0.000585645	0.467384	2.29504	FALSE	1615.02	0.0450292	0.956253	2.47796	0.00312236	G2M						Tb427-060014900	Late G1
915	Tb427-000747600	0.00111558	0.00990099	0.00058736	0.927795	3.4718	FALSE	2091.24	0.0635935	0.938388	2.71811	0.00312979	G2M						Tb427-060015400	Late G1
3558	Tb427-060036500	0.000118958	0.00990099	0.000597302	0.452492	4.27615	FALSE	4062.93	0.163861	0.844709	2.33755	0.00317927	G2M						Tb427-060015700	S
6563	Tb427-100049000	0.000249942	0.00990099	0.000602037	0.567509	1.00055	FALSE	2673.19	0.0893905	0.911819	1.85679	0.00320272	G2M						Tb427-060015800	Late G1
3225	Tb427-050046400	0.000314306	0.00990099	0.000609251	0.468523	3.21512	FALSE	1804.49	0.0524406	0.948465	2.45897	0.00323932	G2M						Tb427-060016500	Late G1
7424	Tb427-100139100	0.00151483	0.00990099	0.000624488	0.443965	3.37448	FALSE	3436.24	0.126676	0.881814	1.98221	0.00331126	G2M						Tb427-060016600	Late G1
5503	Tb427-090026500	0.000637329	0.00990099	0.000654495	0.484578	3.2069	FALSE	2134.27	0.0654673	0.935639	2.52492	0.00344962	G2M						Tb427-060016900	S
4676	Tb427-080024100	0.00582704	0.00990099	0.000671351	0.979895	3.84933	FALSE	4810.29	0.211518	0.80394	1.66764	0.00352887	G2M						Tb427-060017400	G2M
2502	Tb427-040023900	0.000540784	0.00990099	0.000721448	0.72744	2.94598	FALSE	2416.35	0.0772453	0.926477	1.95564	0.00377991	G2M						Tb427-060017700	G2M
3846	Tb427-070014900	0.00129543	0.00990099	0.000736145	0.129355	3.75642	FALSE	6983.41	0.401171	0.64842	1.5247	0.00384651	G2M						Tb427-060017900	Late G1
3409	Tb427-060018900	9.21745e-05	0.00990099	0.000769211	0.00679056	3.63405	FALSE	3093.29	0.109006	0.898076	2.82512	0.0039892	G2M						Tb427-060018900	G2M
8194	Tb427-110052900	0.00296409	0.00990099	0.000794496	0.837969	4.42299	FALSE	4329.79	0.179348	0.833028	2.13322	0.00411154	G2M						Tb427-060019500	S
4570	Tb427-080011000	0.000923362	0.00990099	0.00080059	0.593021	2.19259	FALSE	3195.52	0.114559	0.890289	1.74903	0.00413205	G2M						Tb427-060020000	Late G1
8948	Tb427-110136400	0.00388361	0.00990099	0.000810823	0.993253	4.21049	FALSE	1997.02	0.0598062	0.940907	3.03012	0.00418042	G2M						Tb427-060020500	Late G1
7573	Tb427-100154800	0.000238556	0.00990099	0.00081301	0.681647	2.91368	FALSE	2059.02	0.0624712	0.938846	2.63856	0.00418946	G2M						Tb427-060020800:pseudogene	G2M
2014	Tb427-030028000	0.00130655	0.00990099	0.000821413	0.953514	2.80892	FALSE	3910.2	0.15404	0.853413	1.61811	0.00422603	G2M						Tb427-060021100	S
2041	Tb427-030030700	0.0108929	0.00990099	0.000830411	0.0652633	4.67737	FALSE	2514	0.081457	0.922126	2.85131	0.00426553	G2M						Tb427-060023400	Late G1
3113	Tb427-050035200	0.00445271	0.00990099	0.000830235	0.507176	3.85139	FALSE	1616.36	0.045131	0.955566	2.32029	0.00426553	G2M						Tb427-060023500	S
6033	Tb427-090082600	0.000272755	0.00990099	0.000836286	0.569917	2.84692	FALSE	4227.16	0.174105	0.834402	1.63888	0.00429116	G2M						Tb427-060023700	G2M
8211	Tb427-110054600	0.000401173	0.00990099	0.000842382	0.64695	2.83873	FALSE	4569.69	0.196698	0.813101	1.58811	0.00431788	G2M						Tb427-060024100	Late G1
7359	Tb427-100132500	0.00197224	0.00990099	0.000857357	0.757491	3.19145	FALSE	4835.98	0.213912	0.800046	1.72918	0.00438768	G2M						Tb427-060024700	S
9203	Tb427-110162500	0.00266804	0.00990099	0.000862389	0.654211	4.33065	FALSE	5703.73	0.279323	0.748053	1.86114	0.00440878	G2M						Tb427-060026700	Late G1
2001	Tb427-030026700	0.00135907	0.00990099	0.000862922	0.800991	3.71088	FALSE	4609.36	0.197414	0.818598	1.99032	0.00440917	G2M						Tb427-060028600	S
5586	Tb427-090034900	0.00394201	0.00990099	0.000874081	0.24274	4.00566	FALSE	3191.38	0.114438	0.888914	1.67567	0.0044615	G2M						Tb427-060032300	S
7559	Tb427-100153400	0.00550115	0.00990099	0.000901544	0.235601	3.62794	FALSE	5409.95	0.256512	0.764086	1.56897	0.00457758	G2M						Tb427-060032400:pseudogene	S
2080	Tb427-030034600	0.00436559	0.00990099	0.000917947	0.890572	2.96881	FALSE	3152.53	0.112689	0.89006	1.63759	0.0046487	G2M						Tb427-060032700	Late G1
2222	Tb427-030051000	0.00442258	0.00990099	0.000931429	0.330061	3.67178	FALSE	5697.15	0.279432	0.745305	1.66007	0.00471205	G2M						Tb427-060033600	S
2015	Tb427-030028100	0.00155324	0.019802	0.000940419	0.794395	3.64154	FALSE	2542.39	0.082947	0.920293	2.27796	0.00474646	G2M						Tb427-060034100	Late G1
7154	Tb427-100110300	0.0010857	0.00990099	0.000995973	0.49874	4.35969	FALSE	2778.11	0.0942997	0.907925	2.69463	0.00499833	G2M						Tb427-060034200	Late G1
2363	Tb427-040010000	0.00150508	0.00990099	0.00102139	0.048262	3.48925	FALSE	4485.6	0.189337	0.824553	1.88459	0.00511382	G2M						Tb427-060034700	G2M
1383	Tb427-010016400	0.00149513	0.00990099	0.00103088	0.912632	3.96294	FALSE	3912.4	0.153445	0.857765	1.69838	0.00515598	G2M						Tb427-060035500	Late G1
1599	Tb427-020012900	7.71614e-05	0.00990099	0.00104381	0.79287	1.00051	FALSE	2885.61	0.0995964	0.902199	1.88318	0.00521527	G2M						Tb427-060035700	Late G1
4033	Tb427-070036300	0.000380726	0.00990099	0.00104572	0.684785	3.90338	FALSE	4353.78	0.180349	0.834173	1.89777	0.00522215	G2M						Tb427-060035800	S
1889	Tb427-030014200	0.00672439	0.019802	0.00106706	0.381722	3.27505	FALSE	4751.71	0.206201	0.812414	1.64077	0.00531776	G2M						Tb427-060036000	Late G1
1524	Tb427-010033100	0.0061571	0.00990099	0.00111388	0.0685664	1.70916	FALSE	244.769	0.00446941	0.995419	16.285	0.00552269	G2M						Tb427-060036100	Late G1
2434	Tb427-040017100	0.00012659	0.00990099	0.00114844	0.844526	1.00028	FALSE	4186.43	0.171352	0.836922	1.59306	0.00567333	G2M						Tb427-060036300	G2M
6771	Tb427-100070100	0.0014084	0.019802	0.00116572	0.992096	4.49558	FALSE	2844.23	0.0971383	0.906322	1.98441	0.00575035	G2M						Tb427-060036500	G2M
6246	Tb427-100016300:pseudogene	0.00167149	0.00990099	0.00117341	0.253722	2.5123	FALSE	4543.09	0.193902	0.817682	1.56419	0.00578237	G2M						Tb427-060036600	S
1978	Tb427-030023100:pseudogene	0.00649855	0.00990099	0.00120486	0.381771	3.44366	FALSE	1789.63	0.0515424	0.949382	1.78919	0.00592533	G2M						Tb427-060036900	S
2386	Tb427-040012300	0.000224659	0.00990099	0.00121224	0.689938	3.8893	FALSE	1212.08	0.0314324	0.968163	2.85281	0.00595254	G2M						Tb427-060037300	Late G1
8105	Tb427-110043800	0.00081455	0.00990099	0.00122191	0.826396	3.50781	FALSE	2890.9	0.0991473	0.905863	2.46667	0.00599702	G2M						Tb427-060037500	Late G1
2856	Tb427-050008400	0.00198659	0.00990099	0.00126212	0.803241	3.20203	FALSE	4041.74	0.161419	0.849061	1.67943	0.00617248	G2M						Tb427-060037600	G2M
4339	Tb427-070067100	0.00202634	0.00990099	0.00126415	0.759854	2.38091	FALSE	2801.81	0.0949301	0.908383	1.80651	0.00617928	G2M						Tb427-060037800	S
8388	Tb427-110072300	0.00642042	0.00990099	0.00126684	0.166178	4.15887	FALSE	5031.26	0.225021	0.797984	1.83973	0.00618935	G2M						Tb427-060037900	G2M
2834	Tb427-050006200	0.000865484	0.00990099	0.0012802	0.0768193	3.51029	FALSE	3674	0.139405	0.871278	2.03685	0.00624204	G2M						Tb427-060038000	S
8132	Tb427-110046500	0.00688946	0.00990099	0.00130643	0.463208	4.08286	FALSE	5083.54	0.23227	0.782639	1.87551	0.00636349	G2M						Tb427-060038400	Late G1
350	Tb427-000347900	0.00104929	0.00990099	0.00131789	0.764016	3.25403	FALSE	1201.02	0.0308408	0.970454	4.80146	0.00641611	G2M						Tb427-060039200	Late G1
9010	Tb427-110142700	0.00192633	0.00990099	0.00133725	0.581308	3.37916	FALSE	4466.03	0.188941	0.822034	1.90452	0.00650056	G2M						Tb427-060039600	Late G1
2627	Tb427-040036800	0.00306037	0.00990099	0.00133916	0.907401	2.42364	FALSE	3748.67	0.144367	0.863262	1.62705	0.00650659	G2M						Tb427-060039800	G2M
45	Tb427-000015500	0.000706049	0.019802	0.00135853	0.38076	3.38415	FALSE	2207.37	0.0683048	0.936555	2.85642	0.00658095	G2M						Tb427-060040600	G2M
5964	Tb427-090075700	0.00106545	0.00990099	0.00139353	0.764763	3.38624	FALSE	3437.14	0.127464	0.878149	2.06992	0.00672025	G2M						Tb427-060040700	Late G1
6601	Tb427-100052800	0.00261303	0.00990099	0.00142881	0.268933	4.06811	FALSE	2643.7	0.0879449	0.913422	1.85514	0.00688016	G2M						Tb427-060040800	S
6673	Tb427-100060000	0.000106268	0.019802	0.0014595	0.985451	1.05524	FALSE	2883.89	0.0990772	0.904718	1.88317	0.00700707	G2M						Tb427-060041100	G2M
41	Tb427-000015100	0.00434146	0.00990099	0.00146248	0.103123	4.39639	FALSE	4369.31	0.181247	0.833715	1.96934	0.00701787	G2M						Tb427-060041300	G2M
6661	Tb427-100058800	0.0200144	0.00990099	0.00148984	0.834947	3.59695	FALSE	5211.1	0.241462	0.775538	1.71474	0.00714291	G2M						Tb427-060041400	Late G1
5294	Tb427-080087400	0.00358847	0.00990099	0.00150744	0.647742	3.26043	FALSE	4932.71	0.220089	0.795923	1.62066	0.00721933	G2M						Tb427-060041600	G2M
7419	Tb427-100138600	2.46935e-05	0.019802	0.00152148	0.509585	1.00009	FALSE	2455.76	0.0793748	0.922584	2.14189	0.00727223	G2M						Tb427-060042300	G2M
3569	Tb427-060037600	0.0178772	0.00990099	0.00154687	0.188989	2.76652	FALSE	2728.24	0.0914327	0.910902	1.67608	0.007379	G2M						Tb427-060042400	Early G1
5172	Tb427-080074700	0.000170877	0.00990099	0.00156457	0.997566	1.00001	FALSE	2511.45	0.0817937	0.920064	1.94424	0.00745612	G2M						Tb427-060042600	S
7145	Tb427-100109400:pseudogene	0.00212697	0.00990099	0.00157047	0.977816	3.35858	FALSE	1819.89	0.052733	0.949611	3.11371	0.00746955	G2M						Tb427-060043000	Late G1
1136	Tb427-000806900	0.00213993	0.019802	0.00157544	0.963584	1.00017	FALSE	1094.38	0.0273319	0.972057	2.592	0.00748953	G2M						Tb427-060043100	G2M
7053	Tb427-100100200	0.00174255	0.00990099	0.00158447	0.779968	3.27928	FALSE	2650.21	0.0876562	0.916628	2.17713	0.00752878	G2M						Tb427-060043200	G2M
5687	Tb427-090045500	0.00819301	0.00990099	0.00161205	0.826181	4.11812	FALSE	4210.07	0.172486	0.836464	1.65626	0.00764484	G2M						Tb427-060043400	S
6995	Tb427-100094400	0.000124486	0.00990099	0.00162551	0.875082	1.38211	FALSE	2319.32	0.0733155	0.928768	2.20035	0.00769737	G2M						Tb427-060043800	S
8657	Tb427-110100300	0.00275139	0.00990099	0.00166651	0.985462	3.01592	FALSE	1648.45	0.046358	0.953733	2.40833	0.00786079	G2M						Tb427-060044700	Late G1
3540	Tb427-060034700	0.0040121	0.00990099	0.00174656	0.147936	3.47516	FALSE	2455.37	0.0788747	0.924416	2.38149	0.00821004	G2M						Tb427-060046000	Late G1
2703	Tb427-040044600	0.0148633	0.00990099	0.00175982	0.614073	4.72783	FALSE	4214.61	0.171828	0.83967	1.60621	0.00826476	G2M						Tb427-060048900	S
3927	Tb427-070023700	0.0041144	0.00990099	0.00184409	0.859485	2.72654	FALSE	1960.03	0.0582673	0.94251	2.21792	0.00862292	G2M						Tb427-060049000	Late G1
7257	Tb427-100122300	0.00340711	0.00990099	0.00190132	0.0872004	4.0788	FALSE	3573.13	0.134441	0.873568	2.23958	0.00887342	G2M						Tb427-060050100	Late G1
9143	Tb427-110156500	0.00552193	0.00990099	0.00192303	0.537757	2.7308	FALSE	3485.81	0.129459	0.877462	1.59714	0.0089618	G2M						Tb427-060050300	S
7035	Tb427-100098400	0.00758989	0.00990099	0.00193329	0.145873	4.0125	FALSE	2074.95	0.0626623	0.939762	2.49188	0.0090053	G2M						Tb427-060051300	S
3394	Tb427-060017400	0.00118961	0.00990099	0.00194739	0.578769	2.93741	FALSE	2850.03	0.0974324	0.905405	1.55301	0.00905702	G2M						Tb427-060051600	S
6046	Tb427-090083900	0.00610612	0.00990099	0.0019631	0.387358	3.41024	FALSE	4544.76	0.192693	0.822263	1.58621	0.00912225	G2M						Tb427-060051900	Late G1
5219	Tb427-080079400	0.000765631	0.00990099	0.00199442	0.492777	3.37271	FALSE	2696.49	0.090042	0.91388	2.57477	0.00925008	G2M						Tb427-060052300	G2M
6320	Tb427-100023700:pseudogene	0.00309012	0.00990099	0.00204034	0.571046	3.17619	FALSE	2703.43	0.0902296	0.912964	2.29922	0.00943056	G2M						Tb427-060053000	Late G1
9244	Tb427-110166600	0.00969622	0.00990099	0.00205458	0.767299	3.40812	FALSE	4593.39	0.196527	0.817224	1.65158	0.00947471	G2M						Tb427-060053400	G2M
8713	Tb427-110106100	0.000307108	0.019802	0.00207972	0.825449	3.27884	FALSE	3968.36	0.156144	0.857765	2.05696	0.00958151	G2M						Tb427-060054700	Late G1
7200	Tb427-100116100	0.030348	0.00990099	0.00211494	0.132216	4.60803	FALSE	5077.52	0.230394	0.789052	1.59065	0.00972533	G2M						Tb427-060055300	S
5590	Tb427-090035300	0.00221234	0.00990099	0.00211727	0.540836	3.59387	FALSE	3617.99	0.136725	0.871507	2.15257	0.00973143	G2M						Tb427-060055700	S
6000	Tb427-090079300	0.00523529	0.00990099	0.00212993	0.206817	3.5958	FALSE	2837.91	0.0964614	0.908612	1.89641	0.00978495	G2M						Tb427-060056000	Late G1
9408	Tb427-110183300	0.00824359	0.00990099	0.00215939	0.016057	3.21468	FALSE	2822.17	0.0963326	0.904947	2.09009	0.00989685	G2M						Tb427-070005400	Late G1
3706	Tb427-060051900	0	0.00990099	2.67432e-116	0.223839	4.96213	FALSE	5640.68	0.319205	0.733165	10.9405	1.85254e-113	Late G1		Tb427_060051900				Tb427-070005500	Early G1
4722	Tb427-080028700	0	0.00990099	3.95493e-108	0.371431	4.98779	FALSE	7536.34	0.533756	0.608337	17.5322	1.82643e-105	Late G1		Tb427_080028700				Tb427-070006600	Early G1
4558	Tb427-080009800	0	0.00990099	1.17972e-81	0.436912	4.99525	FALSE	4248.83	0.204318	0.826615	11.9524	3.26884e-79	Late G1		Tb427_080009800				Tb427-070007800	S
6203	Tb427-100011900	0	0.00990099	1.74841e-81	0.971512	4.91773	FALSE	6964.15	0.435626	0.646816	7.58312	4.58273e-79	Late G1		Tb427_100011900				Tb427-070008100	Late G1
9237	Tb427-110165900	0	0.00990099	1.77387e-76	0.197538	4.9027	FALSE	8439.5	0.626076	0.536418	7.00678	4.41101e-74	Late G1		Tb427_110165900				Tb427-070008200	G2M
7243	Tb427-100120400	0	0.00990099	1.24737e-74	0.687822	4.90639	FALSE	6262.82	0.359694	0.695144	7.37005	2.95048e-72	Late G1						Tb427-070008300	Late G1
8521	Tb427-110085600	0	0.00990099	3.637e-74	0.764088	4.92587	FALSE	5655.16	0.310624	0.726065	14.4853	8.39801e-72	Late G1						Tb427-070008900	Late G1
7020	Tb427-100096900	0	0.00990099	5.07029e-74	0.0692441	4.96119	FALSE	3734.95	0.18202	0.838983	31.419	1.14353e-71	Late G1						Tb427-070009500	S
4837	Tb427-080040400	0	0.00990099	7.15948e-74	0.804055	4.96935	FALSE	4354.45	0.214133	0.813101	15.4115	1.57802e-71	Late G1						Tb427-070009900	Late G1
1831	Tb427-030008400	0	0.00990099	1.7135e-71	0.545075	4.92242	FALSE	3978.35	0.199818	0.82524	64.6966	3.61251e-69	Late G1						Tb427-070010600	Late G1
7019	Tb427-100096800	0	0.00990099	8.56213e-71	0.796753	4.94378	FALSE	3415.29	0.15081	0.864636	28.6742	1.72991e-68	Late G1						Tb427-070010700	S
7018	Tb427-100096700	0	0.00990099	6.51078e-70	0.619898	4.96999	FALSE	3753.6	0.169765	0.848603	10.2302	1.26283e-67	Late G1						Tb427-070010900	Late G1
4275	Tb427-070060500	0	0.00990099	7.65055e-67	0.769035	4.96752	FALSE	2952.17	0.122988	0.888456	28.6151	1.349e-64	Late G1						Tb427-070011000	S
3104	Tb427-050034300	0	0.00990099	1.94948e-63	0.838909	4.95634	FALSE	3411.61	0.137356	0.878149	12.8905	3.20441e-61	Late G1						Tb427-070011100	S
6958	Tb427-100090100	0	0.00990099	5.8356e-62	0.821028	4.77608	FALSE	3186.49	0.137055	0.873339	30.9417	8.98313e-60	Late G1						Tb427-070011500	S
4212	Tb427-070054200	0	0.00990099	1.00308e-61	0.184659	4.93975	FALSE	3223.25	0.140462	0.873798	43.3467	1.4966e-59	Late G1						Tb427-070011600	S
4259	Tb427-070058900	0	0.00990099	1.08827e-59	0.917188	4.94931	FALSE	2988.11	0.120438	0.889372	26.9597	1.55206e-57	Late G1						Tb427-070012600	S
8965	Tb427-110138200	0	0.00990099	8.08786e-59	0.82044	4.95676	FALSE	3541.56	0.157777	0.860055	20.6973	1.08939e-56	Late G1						Tb427-070013200	S
3898	Tb427-070020200	0	0.00990099	1.48987e-55	0.060202	4.96597	FALSE	3456.63	0.145718	0.867155	13.426	1.74082e-53	Late G1						Tb427-070013600	S
6249	Tb427-100016600:pseudogene	0	0.00990099	5.40574e-54	0.877586	4.91599	FALSE	2839.19	0.111699	0.895328	30.3265	6.16763e-52	Late G1						Tb427-070014900	G2M
5530	Tb427-090029200	0	0.00990099	6.37695e-52	0.315287	4.7844	FALSE	4308.15	0.195115	0.822492	9.48501	6.79601e-50	Late G1						Tb427-070015100:pseudogene	G2M
9083	Tb427-110150500	0	0.00990099	6.64582e-51	0.659749	4.8606	FALSE	11057.9	1.10824	0.310353	2.01161	6.78433e-49	Late G1						Tb427-070015900	S
7814	Tb427-110014200	0	0.00990099	1.04318e-50	0.347727	4.98	FALSE	4757.84	0.228494	0.799817	8.12	1.05383e-48	Late G1						Tb427-070016300	G2M
4356	Tb427-070068800	0	0.00990099	4.51378e-50	0.463946	4.9395	FALSE	3977.23	0.172365	0.842877	6.87141	4.51285e-48	Late G1						Tb427-070017300	S
7709	Tb427-100170300	0	0.00990099	5.13451e-49	0.474042	4.95086	FALSE	1875.17	0.0697631	0.935181	93.9375	4.93015e-47	Late G1						Tb427-070017600	S
4535	Tb427-080007500	0	0.00990099	2.25267e-46	0.947593	4.9231	FALSE	9173.7	0.703917	0.486486	2.49306	2.04171e-44	Late G1						Tb427-070018300	G2M
8280	Tb427-110061500	0	0.00990099	2.64273e-46	0.276136	4.79159	FALSE	3190.75	0.125574	0.881585	15.3462	2.37307e-44	Late G1						Tb427-070018400	Late G1
8357	Tb427-110069200	0	0.00990099	5.45209e-46	0.736837	4.97293	FALSE	4257.21	0.196936	0.823408	14.844	4.76345e-44	Late G1						Tb427-070018600	S
1411	Tb427-010020500	0	0.00990099	7.9122e-46	0.235615	4.95706	FALSE	6285.28	0.341999	0.708658	3.92353	6.85112e-44	Late G1						Tb427-070019000	Late G1
5547	Tb427-090030900	0	0.00990099	8.8305e-46	0.115451	4.95523	FALSE	4503.56	0.208899	0.810811	10.9527	7.51212e-44	Late G1						Tb427-070019900	S
1741	Tb427-020027500	0	0.00990099	4.92603e-45	0.498491	4.87445	FALSE	5753.04	0.295011	0.73912	3.64974	4.04853e-43	Late G1						Tb427-070020000	S
1444	Tb427-010023900	0	0.00990099	7.28217e-45	0.597996	4.92414	FALSE	7072.01	0.423627	0.650023	2.9166	5.93466e-43	Late G1						Tb427-070020200	Late G1
8137	Tb427-110047000	0	0.00990099	9.45661e-45	0.703695	4.8964	FALSE	4903.02	0.245058	0.781722	19.5923	7.64252e-43	Late G1						Tb427-070020300	S
4463	Tb427-070080400	0	0.00990099	1.86448e-44	0.389727	4.36349	FALSE	3150.29	0.11597	0.88754	4.50785	1.49436e-42	Late G1						Tb427-070022000	G2M
6093	Tb427-090088700	0	0.00990099	2.00496e-39	0.293651	4.87001	FALSE	2590.42	0.0947635	0.910902	17.9054	1.38887e-37	Late G1						Tb427-070022200	Late G1
1623	Tb427-020015600	0	0.00990099	4.24375e-38	0.962276	4.90432	FALSE	6046.23	0.319779	0.722171	3.03615	2.8983e-36	Late G1						Tb427-070023700	G2M
1715	Tb427-020024900	0	0.00990099	4.31416e-38	0.221415	4.87846	FALSE	2781.35	0.104986	0.901741	30.8457	2.92578e-36	Late G1						Tb427-070023900	Late G1
4161	Tb427-070049100	0	0.00990099	1.56852e-37	0.893899	4.66548	FALSE	2977.67	0.112743	0.892808	18.3984	1.02091e-35	Late G1						Tb427-070024000	G2M
8140	Tb427-110047300	0	0.00990099	3.57418e-37	0.179166	4.78143	FALSE	4552.49	0.202449	0.816079	6.52295	2.2508e-35	Late G1						Tb427-070025400	Early G1
8492	Tb427-110082700	0	0.00990099	3.89422e-37	0.833224	4.77526	FALSE	4721.76	0.221215	0.795465	5.47416	2.43653e-35	Late G1						Tb427-070025700	S
3566	Tb427-060037300	0	0.00990099	1.3374e-35	0.967075	4.88315	FALSE	4231.33	0.188691	0.829592	12.3795	7.76654e-34	Late G1						Tb427-070026100	Late G1
3177	Tb427-050041600	0	0.00990099	3.34565e-35	0.601292	4.94323	FALSE	4582.1	0.213858	0.811269	7.81289	1.9086e-33	Late G1						Tb427-070026300	G2M
2528	Tb427-040026500	0	0.00990099	4.78056e-35	0.524327	4.84236	FALSE	3993.83	0.168851	0.841044	9.56087	2.69546e-33	Late G1						Tb427-070027400	G2M
7016	Tb427-100096500	0	0.00990099	3.45952e-34	0.310894	4.62605	FALSE	2783.25	0.104809	0.899908	15.8076	1.92818e-32	Late G1						Tb427-070027500	S
6389	Tb427-100031000	0	0.00990099	5.04332e-34	0.81671	4.57455	FALSE	7728.05	0.499999	0.586578	3.28973	2.79486e-32	Late G1						Tb427-070027700	Late G1
1497	Tb427-010030000	0	0.00990099	1.08724e-33	0.714705	4.7857	FALSE	4295.59	0.184577	0.828676	5.07712	5.92361e-32	Late G1						Tb427-070027800	G2M
8563	Tb427-110089800	0	0.00990099	1.499e-33	0.673488	4.7697	FALSE	4496.75	0.201856	0.816995	5.27877	8.1214e-32	Late G1						Tb427-070028100	G2M
5164	Tb427-080073900	0	0.00990099	1.5988e-33	0.649524	4.58694	FALSE	9456.88	0.758192	0.431974	2.18051	8.61396e-32	Late G1						Tb427-070028500	Late G1
5340	Tb427-090008000	0	0.00990099	6.63479e-33	0.699356	4.86674	FALSE	4217.89	0.183073	0.831654	5.95087	3.51608e-31	Late G1						Tb427-070029600	G2M
4450	Tb427-070079100	0	0.00990099	7.69508e-33	0.303896	4.93919	FALSE	3187.58	0.124215	0.885021	19.3441	4.03388e-31	Late G1						Tb427-070030100	Late G1
1930	Tb427-030018300	0	0.00990099	2.44223e-32	0.844682	4.91513	FALSE	3583.51	0.142341	0.871278	8.15985	1.26656e-30	Late G1						Tb427-070030600	S
3172	Tb427-050041100	0	0.00990099	5.41594e-32	0.326	4.85386	FALSE	2242.26	0.0801412	0.923729	28.0431	2.77904e-30	Late G1						Tb427-070031100	G2M
6912	Tb427-100085500	0	0.00990099	6.91285e-32	0.0333929	4.85099	FALSE	5384.5	0.2642	0.770957	3.58264	3.50999e-30	Late G1						Tb427-070031300	S
6204	Tb427-100012000	0	0.00990099	3.74393e-31	0.717844	4.85894	FALSE	5347.34	0.267312	0.763399	4.90267	1.84308e-29	Late G1						Tb427-070032000	S
4784	Tb427-080035000	0	0.00990099	3.77417e-30	0.379123	4.91885	FALSE	3935.72	0.164032	0.849748	5.17073	1.77679e-28	Late G1						Tb427-070032300	Late G1
4840	Tb427-080040700	0	0.00990099	1.44426e-29	0.748	4.52644	FALSE	6808.44	0.389916	0.668346	3.60182	6.70165e-28	Late G1						Tb427-070032400	S
8249	Tb427-110058400	0	0.00990099	3.054e-29	0.577342	4.60766	FALSE	3085.33	0.116376	0.889143	7.5607	1.384e-27	Late G1						Tb427-070032600	S
8806	Tb427-110121900	0	0.00990099	8.1859e-29	0.251849	4.82998	FALSE	6877.94	0.399157	0.664453	2.69504	3.6416e-27	Late G1						Tb427-070032700	S
6896	Tb427-100083900	0	0.00990099	1.36546e-28	0.756826	4.82655	FALSE	2885.59	0.104219	0.900137	5.82769	6.01919e-27	Late G1						Tb427-070034600	S
8217	Tb427-110055200	0	0.00990099	1.38642e-28	0.669634	4.92008	FALSE	3282.45	0.127047	0.882272	9.68085	6.08392e-27	Late G1						Tb427-070034900	S
5196	Tb427-080077100	0	0.00990099	4.48965e-28	0.557591	4.76419	FALSE	4004.91	0.172648	0.83967	12.5149	1.95249e-26	Late G1						Tb427-070036300	G2M
7400	Tb427-100136700	0	0.00990099	4.78053e-28	0.221434	4.81608	FALSE	3672.58	0.14864	0.860971	8.43915	2.06971e-26	Late G1						Tb427-070037000	Late G1
2019	Tb427-030028500	0	0.00990099	8.83913e-28	0.747249	4.69796	FALSE	2673.1	0.0935292	0.910673	7.48796	3.7763e-26	Late G1						Tb427-070037500	G2M
1844	Tb427-030009700	0	0.00990099	4.08411e-27	0.106246	4.73781	FALSE	3207.69	0.123868	0.885021	7.8053	1.68544e-25	Late G1						Tb427-070038300	S
4905	Tb427-080047200	0	0.00990099	4.24569e-27	0.93335	4.86015	FALSE	3740.37	0.151394	0.860513	13.893	1.74469e-25	Late G1						Tb427-070038600	S
6767	Tb427-100069700	0	0.00990099	9.5881e-27	0.113348	4.82198	FALSE	7350.9	0.451152	0.61727	2.0356	3.8906e-25	Late G1						Tb427-070039000	S
9024	Tb427-110144100	0	0.00990099	1.02085e-26	0.777353	4.81459	FALSE	3813.04	0.154804	0.856848	5.27974	4.1251e-25	Late G1						Tb427-070039400	Late G1
5367	Tb427-090011700	0	0.00990099	1.05994e-26	0.939548	4.71985	FALSE	2297.29	0.0810474	0.922355	31.6634	4.26525e-25	Late G1						Tb427-070039500	S
4937	Tb427-080050400	0	0.00990099	5.74554e-26	0.424429	4.56464	FALSE	8250.07	0.555119	0.55497	2.50799	2.23776e-24	Late G1						Tb427-070039700	G2M
5090	Tb427-080066400	0	0.00990099	9.22755e-26	0.262507	4.73396	FALSE	3918.16	0.160688	0.850893	6.51392	3.57955e-24	Late G1						Tb427-070040900	S
4867	Tb427-080043400	0	0.00990099	9.61187e-26	0.899007	4.87626	FALSE	3962.77	0.164645	0.850206	9.45527	3.71378e-24	Late G1						Tb427-070041100	S
8046	Tb427-110037700	0	0.00990099	1.16202e-25	0.541071	4.87302	FALSE	4351.78	0.19249	0.826157	5.58254	4.45426e-24	Late G1						Tb427-070041200	Early G1
5195	Tb427-080077000	0	0.00990099	1.7997e-25	0.226543	4.7689	FALSE	3118.1	0.120201	0.887769	9.42073	6.8445e-24	Late G1						Tb427-070041400	S
8403	Tb427-110073800	0	0.00990099	3.84086e-25	0.752898	4.72255	FALSE	8971.78	0.658985	0.497022	1.72963	1.43817e-23	Late G1						Tb427-070042100	S
2413	Tb427-040015000	0	0.00990099	5.49241e-25	0.732352	4.71805	FALSE	7659.99	0.483664	0.607421	2.88337	2.04082e-23	Late G1						Tb427-070042400	G2M
4425	Tb427-070076600	0	0.00990099	2.6782e-24	0.588214	4.79531	FALSE	4879.73	0.225973	0.795923	4.22753	9.6915e-23	Late G1						Tb427-070042800	S
7391	Tb427-100135800	0	0.00990099	3.71311e-24	0.786733	4.76674	FALSE	3182.05	0.12267	0.881814	19.0677	1.33865e-22	Late G1						Tb427-070043700	Late G1
3589	Tb427-060039600	0	0.00990099	4.00258e-24	0.367038	4.90895	FALSE	2335.87	0.080772	0.922813	16.3034	1.43236e-22	Late G1						Tb427-070044600	G2M
2016	Tb427-030028200	0	0.00990099	8.39008e-24	0.594342	4.65923	FALSE	3015.88	0.109991	0.894182	7.499	2.94808e-22	Late G1						Tb427-070045300	Late G1
7746	Tb427-110007300	0	0.00990099	1.01114e-23	0.172579	4.82984	FALSE	2961.14	0.108272	0.89716	9.3468	3.54007e-22	Late G1						Tb427-070045400	G2M
4523	Tb427-080006300	0	0.00990099	1.37099e-23	0.191638	4.84811	FALSE	4752.36	0.216345	0.804856	6.85004	4.73163e-22	Late G1						Tb427-070045600	S
7103	Tb427-100105200	0	0.00990099	1.58399e-23	0.363446	4.8176	FALSE	3991.1	0.164613	0.846083	4.34136	5.42811e-22	Late G1						Tb427-070046300	Late G1
1625	Tb427-020015800	0	0.00990099	6.35926e-23	0.563879	4.71288	FALSE	3388.21	0.129786	0.88044	6.3214	2.14139e-21	Late G1						Tb427-070046400	S
1453	Tb427-010024800	0	0.00990099	8.65899e-23	0.635828	4.38768	FALSE	3658.82	0.144288	0.865094	5.31818	2.89569e-21	Late G1						Tb427-070047000	G2M
5338	Tb427-090007800	0	0.00990099	1.08706e-22	0.828815	4.84142	FALSE	2422.78	0.0839592	0.919835	17.0395	3.62277e-21	Late G1						Tb427-070047300	Late G1
7522	Tb427-100149700:pseudogene	0	0.00990099	1.34397e-22	0.489	4.722	FALSE	10464.1	0.978135	0.32547	1.60072	4.44841e-21	Late G1						Tb427-070048200	G2M
6305	Tb427-100022200	0	0.00990099	3.0197e-22	0.393826	4.57172	FALSE	2399.68	0.0818971	0.921438	13.4793	9.79433e-21	Late G1						Tb427-070048700	Late G1
3880	Tb427-070018400	0	0.00990099	3.26908e-22	0.381296	4.88829	FALSE	3585.63	0.142423	0.869675	6.13658	1.05679e-20	Late G1						Tb427-070049100	Late G1
3653	Tb427-060046000	0	0.00990099	5.07688e-22	0.964928	4.84469	FALSE	4655.43	0.210059	0.810353	5.20268	1.61959e-20	Late G1						Tb427-070050000	G2M
9050	Tb427-110147000	0	0.00990099	7.35123e-22	0.130589	4.48698	FALSE	5724.93	0.290858	0.740037	3.55614	2.33745e-20	Late G1						Tb427-070050200	G2M
2702	Tb427-040044500	0	0.00990099	7.69076e-22	0.998529	4.40969	FALSE	2263.9	0.0753278	0.927623	17.0321	2.43742e-20	Late G1						Tb427-070050300	S
3807	Tb427-070010900	0	0.00990099	1.21526e-21	0.746514	4.77893	FALSE	2838.6	0.102377	0.90197	7.04193	3.82648e-20	Late G1						Tb427-070050500	S
8219	Tb427-110055400	0	0.00990099	1.44015e-21	0.790055	4.63044	FALSE	2921.88	0.103221	0.903344	3.43996	4.50536e-20	Late G1						Tb427-070051200	Late G1
3230	Tb427-050046900	0	0.00990099	3.11623e-21	0.149034	4.38322	FALSE	3443.34	0.131886	0.876088	6.03345	9.6246e-20	Late G1						Tb427-070051300	Late G1
2619	Tb427-040036000	0	0.00990099	4.60081e-21	0.0271696	4.76826	FALSE	9027.53	0.674204	0.477554	1.74746	1.41198e-19	Late G1						Tb427-070051500	G2M
3378	Tb427-060015800	0	0.00990099	4.72895e-21	0.550464	4.63936	FALSE	3914.88	0.162238	0.853642	8.24939	1.44673e-19	Late G1						Tb427-070052900	S
4556	Tb427-080009600	0	0.00990099	7.81082e-21	0.962043	4.97337	FALSE	1496.67	0.0465831	0.955337	22.5846	2.35246e-19	Late G1						Tb427-070053000	S
5969	Tb427-090076200	0	0.00990099	2.10248e-20	0.559393	4.63069	FALSE	4409.45	0.189855	0.827073	4.40106	6.23542e-19	Late G1						Tb427-070053300	Early G1
6103	Tb427-090089700	0	0.00990099	2.31161e-20	0.798772	4.77494	FALSE	5060.02	0.237666	0.785845	5.21852	6.81398e-19	Late G1						Tb427-070053400	S
8130	Tb427-110046300	0	0.00990099	2.61423e-20	0.573681	4.91804	FALSE	3265.28	0.123285	0.885021	4.74335	7.6364e-19	Late G1						Tb427-070053700	Late G1
6715	Tb427-100064300	0	0.00990099	2.60054e-20	0.642386	4.82088	FALSE	4550.36	0.201031	0.814475	4.2475	7.6364e-19	Late G1						Tb427-070054100	S
2486	Tb427-040022300	0	0.00990099	2.65319e-20	0.685348	4.5179	FALSE	6105.22	0.316757	0.724004	2.63986	7.72691e-19	Late G1						Tb427-070054200	Late G1
3266	Tb427-050052100	0	0.00990099	1.03967e-19	0.74714	4.47543	FALSE	3631.86	0.144598	0.862574	5.53159	2.96551e-18	Late G1						Tb427-070054300	G2M
2513	Tb427-040025000	0	0.00990099	1.58682e-19	0.594272	4.8899	FALSE	3746.57	0.150272	0.859139	5.57269	4.46057e-18	Late G1						Tb427-070054700	S
7524	Tb427-100149900	0	0.00990099	1.78673e-19	0.778746	4.29086	FALSE	8293.44	0.565103	0.538021	1.84903	4.99357e-18	Late G1						Tb427-070056100	G2M
6704	Tb427-100063200	0	0.00990099	1.82593e-19	0.653614	4.70881	FALSE	4673.15	0.209759	0.80852	4.69304	5.08846e-18	Late G1						Tb427-070056200	S
2533	Tb427-040027000	0	0.00990099	2.57979e-19	0.593629	4.7975	FALSE	8282.94	0.556664	0.556574	2.63231	7.06746e-18	Late G1						Tb427-070056500	S
4743	Tb427-080030800	0	0.00990099	2.87476e-19	0.737538	4.51668	FALSE	4481.3	0.192703	0.824324	4.10947	7.85335e-18	Late G1						Tb427-070057100	G2M
1621	Tb427-020015400	0	0.00990099	3.38605e-19	0.855136	4.67551	FALSE	2418.11	0.0809596	0.9235	7.84046	9.22412e-18	Late G1						Tb427-070057300	Late G1
3534	Tb427-060034100	0	0.00990099	4.62957e-19	0.132065	4.84416	FALSE	3728.78	0.151321	0.859139	4.96028	1.25063e-17	Late G1						Tb427-070057600	Late G1
5522	Tb427-090028400	0	0.00990099	7.51955e-19	0.463033	4.657	FALSE	8132.22	0.536592	0.567568	1.80528	1.99793e-17	Late G1						Tb427-070057800	G2M
5693	Tb427-090046100	0	0.00990099	9.86855e-19	0.417757	4.63935	FALSE	2257.91	0.0759231	0.927852	11.0467	2.60069e-17	Late G1						Tb427-070058100	G2M
3105	Tb427-050034400	0	0.00990099	1.46754e-18	0.910449	4.48023	FALSE	3623.25	0.142063	0.86601	4.97913	3.81559e-17	Late G1						Tb427-070058700	Late G1
7504	Tb427-100147900	0	0.00990099	1.68771e-18	0.265339	4.50666	FALSE	1601.58	0.0474784	0.952817	14.8558	4.36464e-17	Late G1						Tb427-070058900	Late G1
4183	Tb427-070051300	0	0.00990099	2.11601e-18	0.812043	4.63048	FALSE	2498.93	0.0840025	0.916858	5.00336	5.42884e-17	Late G1						Tb427-070059100	S
1432	Tb427-010022700	0	0.00990099	2.53537e-18	0.67661	4.72797	FALSE	4387.29	0.18895	0.827302	3.66231	6.45684e-17	Late G1						Tb427-070059400:pseudogene	Late G1
7352	Tb427-100131800	0	0.00990099	2.74263e-18	0.903014	4.80555	FALSE	2534.31	0.0875531	0.917545	9.9349	6.96284e-17	Late G1						Tb427-070059500	S
7326	Tb427-100129200	0	0.00990099	5.85072e-18	0.199228	4.67323	FALSE	2538.67	0.0874586	0.915254	6.61059	1.45488e-16	Late G1						Tb427-070059600	G2M
7001	Tb427-100095000	0	0.00990099	7.24887e-18	0.0375933	4.57004	FALSE	4904.59	0.225093	0.793862	4.17776	1.79336e-16	Late G1						Tb427-070059800	S
8625	Tb427-110096100	0	0.00990099	8.79817e-18	0.286098	4.58957	FALSE	4774.68	0.214085	0.800046	2.49659	2.17111e-16	Late G1						Tb427-070060100	G2M
8184	Tb427-110051800	0	0.00990099	8.94156e-18	0.670315	4.59429	FALSE	3048.83	0.113205	0.890518	6.67529	2.2009e-16	Late G1						Tb427-070060500	Late G1
8229	Tb427-110056400	0	0.00990099	1.31598e-17	0.628025	4.72013	FALSE	2392.08	0.0799485	0.926248	9.19113	3.22282e-16	Late G1						Tb427-070062300	Late G1
4785	Tb427-080035100	0	0.00990099	1.5447e-17	0.390293	4.73631	FALSE	3962.7	0.161919	0.851809	3.17051	3.74514e-16	Late G1						Tb427-070062400	S
2130	Tb427-030041100	0	0.00990099	2.43725e-17	0.354388	4.72729	FALSE	2865.74	0.103396	0.903115	6.20601	5.85061e-16	Late G1						Tb427-070062500	Late G1
4835	Tb427-080040200	0	0.00990099	2.53461e-17	0.211309	4.75148	FALSE	2268.22	0.0747863	0.929226	5.80691	6.05435e-16	Late G1						Tb427-070063100	Late G1
4243	Tb427-070057300	0	0.00990099	3.69142e-17	0.0604305	4.51536	FALSE	3359.78	0.130159	0.874485	5.01597	8.75292e-16	Late G1						Tb427-070063200	G2M
6640	Tb427-100056700	0	0.00990099	4.32719e-17	0.968945	4.54476	FALSE	3211.48	0.120494	0.883875	8.8245	1.02354e-15	Late G1						Tb427-070063800	S
2515	Tb427-040025200	0	0.00990099	8.2712e-17	0.281556	4.72222	FALSE	2393.91	0.0791112	0.922813	7.21342	1.9236e-15	Late G1						Tb427-070065100	Late G1
4654	Tb427-080021800	0	0.00990099	1.14317e-16	0.589005	4.83824	FALSE	2117.53	0.0679568	0.932661	5.89548	2.60858e-15	Late G1						Tb427-070067100	G2M
7321	Tb427-100128700	0	0.00990099	1.48143e-16	0.736386	4.79781	FALSE	2757.34	0.0969936	0.907238	5.37513	3.36462e-15	Late G1						Tb427-070067500	Late G1
5724	Tb427-090049200	0	0.00990099	2.12117e-16	0.189958	4.75275	FALSE	3476.91	0.132566	0.876088	4.90808	4.76183e-15	Late G1						Tb427-070068200	Late G1
6844	Tb427-100078600	0	0.00990099	5.85342e-16	0.594057	4.74858	FALSE	2007.64	0.0628452	0.938388	7.2253	1.27565e-14	Late G1						Tb427-070068300	S
2797	Tb427-040054600	0	0.00990099	6.62736e-16	0.928183	4.60785	FALSE	3368.23	0.128058	0.880898	3.58507	1.44108e-14	Late G1						Tb427-070068500	S
2335	Tb427-040007200	0	0.00990099	7.79073e-16	0.95886	4.92565	FALSE	3341.89	0.126324	0.879066	5.27363	1.68649e-14	Late G1						Tb427-070068600	S
4123	Tb427-070045300	0	0.00990099	1.01573e-15	0.0883019	4.60509	FALSE	3364.5	0.126088	0.883417	3.13548	2.18902e-14	Late G1						Tb427-070068800	Late G1
5632	Tb427-090039700	0	0.00990099	1.10972e-15	0.908217	4.75596	FALSE	2086.5	0.065229	0.9377	5.24679	2.38627e-14	Late G1						Tb427-070068900	Late G1
8892	Tb427-110130800	0	0.00990099	1.15317e-15	0.797386	4.18476	FALSE	5177.71	0.24315	0.776913	2.69935	2.46875e-14	Late G1						Tb427-070069300	S
9028	Tb427-110144500	0	0.00990099	1.29619e-15	0.382306	4.76304	FALSE	1858.5	0.057252	0.943655	9.25217	2.76273e-14	Late G1						Tb427-070069600	Late G1
2361	Tb427-040009800	0	0.00990099	1.51964e-15	0.706312	4.55108	FALSE	2915.2	0.102133	0.903573	4.19958	3.18993e-14	Late G1						Tb427-070070100	Late G1
5113	Tb427-080068700	0	0.00990099	1.96482e-15	0.344865	4.82573	FALSE	4382.19	0.18694	0.827302	3.08563	4.08901e-14	Late G1						Tb427-070072300	S
1617	Tb427-020015000	0	0.00990099	2.65309e-15	0.0954836	4.7226	FALSE	1350.69	0.0393332	0.960834	30.0129	5.49779e-14	Late G1						Tb427-070072400	S
4590	Tb427-080013000	0	0.00990099	3.58796e-15	0.949646	4.28152	FALSE	3426.46	0.12955	0.877462	4.33707	7.38769e-14	Late G1						Tb427-070072900	S
5715	Tb427-090048300	0	0.00990099	4.13412e-15	0.0935277	4.17509	FALSE	2722.21	0.0938854	0.908841	5.19534	8.47626e-14	Late G1						Tb427-070073100	Early G1
8168	Tb427-110050200	0	0.00990099	4.57807e-15	0.500338	4.68847	FALSE	3933.6	0.159468	0.850893	2.77684	9.3667e-14	Late G1						Tb427-070073300	Late G1
6438	Tb427-100036400	0	0.00990099	5.95369e-15	0.799648	4.71748	FALSE	3319.91	0.125429	0.882501	6.47557	1.213e-13	Late G1						Tb427-070075000	Late G1
7623	Tb427-100160500	0	0.00990099	7.23801e-15	0.3606	4.27906	FALSE	7539.14	0.462267	0.611315	1.53329	1.4685e-13	Late G1						Tb427-070076500	G2M
4293	Tb427-070062300	0	0.00990099	8.87601e-15	0.128142	4.66701	FALSE	2010.5	0.0632487	0.938846	8.03518	1.7896e-13	Late G1						Tb427-070076600	Late G1
1620	Tb427-020015300	0	0.00990099	1.00161e-14	0.433129	4.76148	FALSE	1930.22	0.0596973	0.941365	6.22906	2.00694e-13	Late G1						Tb427-070076700	S
2629	Tb427-040037000	0	0.00990099	1.17023e-14	0.409133	4.23277	FALSE	2560.7	0.0863051	0.91617	5.66866	2.33036e-13	Late G1						Tb427-070077100	S
7047	Tb427-100099600	0	0.00990099	1.35688e-14	0.308548	4.64383	FALSE	4002.53	0.162645	0.850664	3.33367	2.68551e-13	Late G1						Tb427-070077300	S
8523	Tb427-110085800	0	0.00990099	1.60845e-14	0.74773	4.55562	FALSE	3835.52	0.152024	0.860055	2.96994	3.17047e-13	Late G1						Tb427-070077600	S
4866	Tb427-080043300	0	0.00990099	2.43362e-14	0.775042	3.83763	FALSE	8612.93	0.596583	0.534127	1.93356	4.73921e-13	Late G1						Tb427-070078000	Early G1
5823	Tb427-090059100	0	0.00990099	3.13009e-14	0.550707	4.66607	FALSE	4109.58	0.168822	0.842419	3.24999	5.99913e-13	Late G1						Tb427-070078900	G2M
1370	Tb427-010015000	0	0.00990099	3.69546e-14	0.948128	4.4848	FALSE	3281.68	0.121878	0.884563	5.52729	7.06875e-13	Late G1						Tb427-070079100	Late G1
7508	Tb427-100148300	0	0.00990099	4.23888e-14	0.465265	4.67796	FALSE	4558.23	0.197906	0.816766	2.79459	8.04476e-13	Late G1						Tb427-070079600	Late G1
8767	Tb427-110111500	0	0.00990099	5.71709e-14	0.683336	4.33973	FALSE	4690.39	0.207336	0.809895	4.10388	1.08079e-12	Late G1						Tb427-070079700	Late G1
2219	Tb427-030050500	0	0.00990099	6.67755e-14	0.953742	4.66303	FALSE	5133.29	0.238291	0.785616	2.38569	1.2599e-12	Late G1						Tb427-070079900	Late G1
4862	Tb427-080042900	0	0.00990099	9.79916e-14	0.0117597	4.67659	FALSE	4487.53	0.192156	0.82547	3.43978	1.8346e-12	Late G1						Tb427-070080100	G2M
8688	Tb427-110103400	0	0.00990099	1.00548e-13	0.499846	4.60978	FALSE	2478.5	0.0824815	0.921209	10.153	1.87523e-12	Late G1						Tb427-070080400	Late G1
5525	Tb427-090028700	0	0.00990099	1.15069e-13	0.779818	4.77573	FALSE	2054.36	0.0638799	0.9377	5.29926	2.13781e-12	Late G1						Tb427-070080800	Late G1
4456	Tb427-070079700	0	0.00990099	1.40211e-13	0.549506	4.70509	FALSE	3565.59	0.137037	0.87082	2.86632	2.59498e-12	Late G1						Tb427-070080900	Late G1
8586	Tb427-110092100	0	0.00990099	1.99753e-13	0.771232	4.72912	FALSE	7768.57	0.485531	0.601695	1.82676	3.67591e-12	Late G1						Tb427-070081200	Late G1
8997	Tb427-110141400	0	0.00990099	4.10599e-13	0.980803	4.8568	FALSE	2614.37	0.0902697	0.91388	8.49869	7.44298e-12	Late G1						Tb427-070081300	Late G1
7648	Tb427-100163000	0	0.00990099	5.47414e-13	0.148124	4.45647	FALSE	4118.88	0.169033	0.841732	3.13422	9.83116e-12	Late G1						Tb427-070081600:pseudogene	S
8835	Tb427-110124800	0	0.00990099	5.50052e-13	0.0842246	4.2015	FALSE	5090.09	0.236658	0.78218	2.66871	9.86027e-12	Late G1						Tb427-070082300	S
7714	Tb427-100170800	0	0.00990099	5.97124e-13	0.921436	4.15801	FALSE	5785.07	0.288884	0.743243	1.90804	1.06255e-11	Late G1						Tb427-070083700:pseudogene	Late G1
415	Tb427-000481600:pseudogene	0	0.00990099	6.92349e-13	0.289236	4.15943	FALSE	4250.27	0.177074	0.834402	2.90939	1.2208e-11	Late G1						Tb427-070085400:pseudogene	Early G1
4823	Tb427-080038900	0	0.00990099	7.42704e-13	0.702112	4.8232	FALSE	1405.16	0.0400113	0.961521	12.6569	1.30721e-11	Late G1						Tb427-080005700	G2M
5906	Tb427-090068200	0	0.00990099	8.74566e-13	0.597668	4.6041	FALSE	3482.24	0.132989	0.874714	2.88798	1.53096e-11	Late G1						Tb427-080006300	Late G1
8832	Tb427-110124500	0	0.00990099	9.91596e-13	0.751477	4.79785	FALSE	2902.18	0.10442	0.900596	4.33972	1.72959e-11	Late G1						Tb427-080006400	G2M
3443	Tb427-060023400	0	0.00990099	1.1621e-12	0.699998	4.68596	FALSE	2743.97	0.0956871	0.909528	4.97895	2.00893e-11	Late G1						Tb427-080006700	Late G1
3374	Tb427-060015400	0	0.00990099	1.1783e-12	0.431636	4.56077	FALSE	3091.18	0.111843	0.894182	4.01146	2.03329e-11	Late G1						Tb427-080007300	S
119	Tb427-000109000	0	0.00990099	1.2092e-12	0.660046	4.30889	FALSE	2096.58	0.0663176	0.938617	4.09517	2.07923e-11	Late G1						Tb427-080007400	S
7668	Tb427-100165000	0	0.00990099	1.47267e-12	0.979809	4.57173	FALSE	2260.81	0.0732976	0.929226	9.69733	2.51444e-11	Late G1						Tb427-080007500	Late G1
6765	Tb427-100069500	0	0.00990099	1.62479e-12	0.541044	4.03831	FALSE	6113.77	0.316155	0.723087	1.68805	2.75475e-11	Late G1						Tb427-080007800	Late G1
8941	Tb427-110135700	0	0.00990099	1.97403e-12	0.277317	4.51412	FALSE	2575.47	0.0880726	0.914109	5.76076	3.34104e-11	Late G1						Tb427-080008000	G2M
4527	Tb427-080006700	0	0.00990099	2.35019e-12	0.627514	4.32966	FALSE	7171.7	0.419833	0.64109	1.87123	3.95011e-11	Late G1						Tb427-080008300	G2M
5457	Tb427-090021500	0	0.00990099	3.31372e-12	0.741684	4.47633	FALSE	2736.98	0.0943188	0.909528	5.26571	5.51225e-11	Late G1						Tb427-080008400	G2M
8402	Tb427-110073700	0	0.00990099	3.61122e-12	0.678316	4.13821	FALSE	9560.06	0.75213	0.446175	1.73512	5.99685e-11	Late G1						Tb427-080009000	S
1609	Tb427-020013900	0	0.00990099	3.90849e-12	0.0479839	4.4296	FALSE	571.397	0.0134909	0.986257	28.9319	6.46835e-11	Late G1						Tb427-080009300	S
5986	Tb427-090077900	0	0.00990099	3.92446e-12	0.757529	4.61141	FALSE	10312	0.933015	0.340586	1.60487	6.48371e-11	Late G1						Tb427-080009600	Late G1
6621	Tb427-100054800:pseudogene	0	0.00990099	4.51604e-12	0.725098	4.1745	FALSE	3752.93	0.148177	0.860971	4.19204	7.39806e-11	Late G1						Tb427-080009800	Late G1
6059	Tb427-090085200	0	0.00990099	4.85571e-12	0.931331	4.83324	FALSE	2071.12	0.0641073	0.939075	3.42612	7.92772e-11	Late G1						Tb427-080010200:pseudogene	G2M
5933	Tb427-090070900	0	0.00990099	4.8899e-12	0.724792	4.71493	FALSE	3064.61	0.110698	0.896015	3.97193	7.97012e-11	Late G1						Tb427-080010700	G2M
6755	Tb427-100068500	0	0.00990099	6.01086e-12	0.117441	4.31215	FALSE	4158.91	0.171373	0.841044	3.16683	9.76437e-11	Late G1						Tb427-080010900	S
1616	Tb427-020014900	0	0.00990099	6.76683e-12	0.298392	4.81683	FALSE	885.636	0.0222454	0.978012	7.86217	1.09557e-10	Late G1						Tb427-080011000	G2M
3717	Tb427-060053000	0	0.00990099	7.53157e-12	0.592782	4.22142	FALSE	5211.22	0.243575	0.775538	2.43529	1.21331e-10	Late G1						Tb427-080011500	S
6517	Tb427-100044300	0	0.00990099	8.13145e-12	0.731068	4.45645	FALSE	3579.73	0.13757	0.870591	3.75591	1.3037e-10	Late G1						Tb427-080011700	S
8616	Tb427-110095200	0	0.00990099	8.76835e-12	0.874161	4.82733	FALSE	2902.34	0.101848	0.901741	2.72213	1.40091e-10	Late G1						Tb427-080011800	S
7293	Tb427-100125900	0	0.00990099	9.05874e-12	0.252539	4.86058	FALSE	2105.02	0.0660283	0.936784	5.19696	1.44256e-10	Late G1						Tb427-080011900	Late G1
1624	Tb427-020015700	0	0.00990099	9.43935e-12	0.86254	4.56704	FALSE	3377.28	0.125821	0.879753	3.38261	1.5007e-10	Late G1						Tb427-080012900	Late G1
2785	Tb427-040053400	0	0.00990099	9.92753e-12	0.0392836	3.97013	FALSE	4805.52	0.215929	0.797984	2.90244	1.57316e-10	Late G1						Tb427-080013000	Late G1
1836	Tb427-030008900	0	0.00990099	1.0078e-11	0.767939	4.08319	FALSE	3632.12	0.139591	0.868071	2.9028	1.59439e-10	Late G1						Tb427-080013600	S
7892	Tb427-110022100	0	0.00990099	1.05771e-11	0.721002	4.15361	FALSE	6564.95	0.359275	0.684608	1.91327	1.66521e-10	Late G1						Tb427-080013700	S
4468	Tb427-070080900	0	0.00990099	1.27477e-11	0.620233	4.63523	FALSE	2503.02	0.0840337	0.919377	4.31677	2.00044e-10	Late G1						Tb427-080016900	S
2894	Tb427-050012400	0	0.00990099	1.39313e-11	0.521879	4.65705	FALSE	6317.05	0.335171	0.704993	2.60436	2.18265e-10	Late G1						Tb427-080017400	Late G1
6252	Tb427-100016900	0	0.00990099	1.51368e-11	0.462904	3.84121	FALSE	8063.45	0.52768	0.567339	1.98903	2.36007e-10	Late G1						Tb427-080017700	G2M
5326	Tb427-090006600	0	0.00990099	1.92009e-11	0.0272819	4.19901	FALSE	3772.52	0.146608	0.865552	3.85267	2.97198e-10	Late G1						Tb427-080017800	G2M
4350	Tb427-070068200	0	0.00990099	2.0489e-11	0.578762	4.29868	FALSE	2479.81	0.0834225	0.918461	5.08972	3.15902e-10	Late G1						Tb427-080017900	S
9242	Tb427-110166400	0	0.00990099	2.06307e-11	0.721856	4.94259	FALSE	2610.01	0.0891383	0.914796	7.98794	3.17582e-10	Late G1						Tb427-080019600	S
2455	Tb427-040019200	0	0.00990099	2.16401e-11	0.911256	4.75737	FALSE	4673.08	0.204724	0.809437	2.23245	3.32066e-10	Late G1						Tb427-080019700	Late G1
8904	Tb427-110132000	0	0.00990099	2.56633e-11	0.127824	4.21788	FALSE	5460.67	0.2626	0.763857	2.66173	3.91942e-10	Late G1						Tb427-080020700	G2M
3973	Tb427-070028500	0	0.00990099	2.70377e-11	0.690944	4.62929	FALSE	4707.35	0.207658	0.808291	3.56047	4.12282e-10	Late G1						Tb427-080021800	Late G1
6037	Tb427-090083000	0	0.00990099	3.93447e-11	0.61494	4.74339	FALSE	8550.8	0.597217	0.519469	1.52986	5.89744e-10	Late G1						Tb427-080021900	S
6062	Tb427-090085500	0	0.00990099	4.04876e-11	0.739035	4.42002	FALSE	3261.47	0.120264	0.886624	4.58718	6.0594e-10	Late G1						Tb427-080022000	G2M
3123	Tb427-050036200	0	0.00990099	5.04141e-11	0.329677	4.28928	FALSE	2706.76	0.0931395	0.910444	5.53138	7.52178e-10	Late G1						Tb427-080022300	G2M
4836	Tb427-080040300	7.11848e-07	0.00990099	5.07445e-11	0.809329	4.63406	FALSE	6985.69	0.39979	0.65552	1.51197	7.55945e-10	Late G1						Tb427-080022400	S
6123	Tb427-090092200	0	0.00990099	5.72707e-11	0.591296	4.19101	FALSE	3749.48	0.147871	0.860513	3.39495	8.47956e-10	Late G1						Tb427-080023700	G2M
5941	Tb427-090071900	0	0.00990099	5.84586e-11	0.644885	4.69481	FALSE	3054.2	0.109968	0.896931	3.47686	8.6291e-10	Late G1						Tb427-080023900	G2M
9360	Tb427-110178400	0	0.00990099	5.954e-11	0.57029	4.03214	FALSE	8766.78	0.63059	0.498626	1.70076	8.77537e-10	Late G1						Tb427-080024100	G2M
7691	Tb427-100168500	0	0.00990099	6.10385e-11	0.826281	4.11339	FALSE	2704.13	0.0925302	0.910673	5.36686	8.98257e-10	Late G1						Tb427-080024700	S
6415	Tb427-100033800	0	0.00990099	6.14004e-11	0.462359	4.30449	FALSE	3749.46	0.146515	0.862116	3.723	9.02214e-10	Late G1						Tb427-080025300	G2M
7839	Tb427-110016700	0	0.00990099	6.80259e-11	0.235308	4.62272	FALSE	2985.19	0.106042	0.898992	3.15507	9.95045e-10	Late G1						Tb427-080025700	G2M
6105	Tb427-090089900	0	0.00990099	7.0767e-11	0.744151	4.44084	FALSE	3454.1	0.130773	0.878607	3.29297	1.03358e-09	Late G1						Tb427-080026200	G2M
4495	Tb427-070083700:pseudogene	0	0.00990099	8.63554e-11	0.90915	4.32302	FALSE	3623.82	0.138103	0.876317	2.1545	1.24439e-09	Late G1						Tb427-080027000	G2M
4182	Tb427-070051200	0	0.00990099	1.0073e-10	0.482676	4.87941	FALSE	7420.43	0.446006	0.625057	1.9703	1.44296e-09	Late G1						Tb427-080027800	S
3348	Tb427-060012400	0	0.00990099	1.1509e-10	0.847108	4.45869	FALSE	2219.15	0.06985	0.933578	5.61915	1.63897e-09	Late G1						Tb427-080028000	S
5214	Tb427-080078900	0	0.00990099	1.53546e-10	0.257172	4.56782	FALSE	4478.14	0.19125	0.821805	3.04819	2.17703e-09	Late G1						Tb427-080028700	Late G1
6658	Tb427-100058500	0	0.00990099	1.75135e-10	0.729533	4.72651	FALSE	4451.93	0.190159	0.824095	3.44256	2.47229e-09	Late G1						Tb427-080029100	Late G1
9382	Tb427-110180600	6.7901e-07	0.00990099	1.83529e-10	0.903024	4.67944	FALSE	2596.39	0.0862336	0.916628	2.67969	2.58325e-09	Late G1						Tb427-080029400	S
3340	Tb427-060011600	0	0.00990099	1.98487e-10	0.66189	3.96941	FALSE	5200.6	0.23966	0.786532	1.93582	2.78169e-09	Late G1						Tb427-080029500	S
4064	Tb427-070039400	0	0.00990099	2.02761e-10	0.124963	4.40524	FALSE	4029.87	0.163248	0.845625	3.08335	2.82526e-09	Late G1						Tb427-080029800	S
8273	Tb427-110060800	0	0.00990099	2.37408e-10	0.732945	4.41442	FALSE	1829.9	0.0545929	0.946862	7.64453	3.28912e-09	Late G1						Tb427-080030800	Late G1
5387	Tb427-090013700	0	0.00990099	2.59834e-10	0.330792	4.58714	FALSE	3332.37	0.123347	0.885937	2.82936	3.58445e-09	Late G1						Tb427-080031700	S
3268	Tb427-050052300	0	0.00990099	2.72269e-10	0.296096	4.43217	FALSE	1163.45	0.0310542	0.969308	10.0498	3.74533e-09	Late G1						Tb427-080033500	Late G1
7497	Tb427-100147000	0	0.00990099	2.78009e-10	0.151046	4.57427	FALSE	1769.83	0.0528442	0.947778	7.19645	3.81888e-09	Late G1						Tb427-080034600	G2M
3254	Tb427-050050900	0	0.00990099	3.26013e-10	0.335387	3.98903	FALSE	2592.4	0.0868176	0.915483	3.1531	4.4468e-09	Late G1						Tb427-080034700	Late G1
8608	Tb427-110094400	0	0.00990099	3.81973e-10	0.79281	4.89015	FALSE	3303.3	0.122267	0.883188	3.60123	5.18095e-09	Late G1						Tb427-080035000	Late G1
5109	Tb427-080068300	0	0.00990099	4.06262e-10	0.153006	4.32394	FALSE	2993.31	0.106439	0.89716	4.67896	5.47973e-09	Late G1						Tb427-080035100	Late G1
6025	Tb427-090081800	0	0.00990099	4.3531e-10	0.699685	4.96812	FALSE	6091.92	0.311582	0.733394	2.37211	5.85526e-09	Late G1						Tb427-080035400	G2M
7917	Tb427-110024600	0	0.00990099	4.47854e-10	0.255465	4.44141	FALSE	9666.27	0.781684	0.419148	1.79696	6.01445e-09	Late G1						Tb427-080036000	Late G1
7275	Tb427-100124100	0	0.00990099	5.01999e-10	0.757773	4.05313	FALSE	3634.15	0.140176	0.865323	2.39488	6.71501e-09	Late G1						Tb427-080036100	S
9370	Tb427-110179400	0	0.00990099	5.11353e-10	0.755981	3.94074	FALSE	3986.02	0.160499	0.848145	3.12897	6.83072e-09	Late G1						Tb427-080036300	Late G1
5225	Tb427-080080000	0	0.00990099	5.65064e-10	0.389508	4.46724	FALSE	3508.81	0.132893	0.871965	2.38901	7.51714e-09	Late G1						Tb427-080037000	S
3577	Tb427-060038400	0	0.00990099	5.99066e-10	0.291574	4.40518	FALSE	2509.17	0.0833863	0.919377	5.93301	7.95359e-09	Late G1						Tb427-080038000	G2M
6225	Tb427-100014200	0	0.00990099	5.99512e-10	0.933841	4.32738	FALSE	2313.74	0.0745605	0.930142	3.10458	7.95359e-09	Late G1						Tb427-080038400	Early G1
6266	Tb427-100018300	0	0.00990099	6.52904e-10	0.643369	4.50846	FALSE	1945.47	0.0592023	0.941136	4.40579	8.62651e-09	Late G1						Tb427-080038600	S
2240	Tb427-030053000	0	0.00990099	7.91383e-10	0.696182	4.27018	FALSE	3022.66	0.107314	0.897618	3.98212	1.03714e-08	Late G1						Tb427-080038700	G2M
8614	Tb427-110095000	0	0.00990099	8.56836e-10	0.0838663	4.27783	FALSE	3453.57	0.129392	0.88044	2.8658	1.11688e-08	Late G1						Tb427-080038900	Late G1
3199	Tb427-050043800	0	0.00990099	8.68418e-10	0.521797	4.77119	FALSE	1859.87	0.0568486	0.946175	15.7488	1.13046e-08	Late G1						Tb427-080039000	Early G1
7311	Tb427-100127700	0	0.00990099	8.77559e-10	0.429373	4.28255	FALSE	6563.31	0.35622	0.689647	1.7468	1.14083e-08	Late G1						Tb427-080039100	G2M
4872	Tb427-080043900	0	0.00990099	9.29925e-10	0.366025	4.46249	FALSE	1637.32	0.0473752	0.953504	9.93958	1.20567e-08	Late G1						Tb427-080039600	Late G1
6107	Tb427-090090100	0	0.00990099	9.87783e-10	0.0449566	4.1084	FALSE	5891.88	0.295433	0.73935	2.36885	1.27727e-08	Late G1						Tb427-080039800	Late G1
2934	Tb427-050016400	1.28022e-06	0.00990099	1.00777e-09	0.547302	4.90898	FALSE	7455.56	0.450474	0.619789	2.40595	1.30138e-08	Late G1						Tb427-080040200	Late G1
8931	Tb427-110134700	0	0.00990099	1.04452e-09	0.953155	4.72107	FALSE	3417.57	0.127724	0.879982	2.49627	1.34525e-08	Late G1						Tb427-080040300	Late G1
7000	Tb427-100094900	0	0.00990099	1.13695e-09	0.532477	4.94569	FALSE	3214.23	0.117737	0.886166	4.18272	1.46236e-08	Late G1						Tb427-080040400	Late G1
7106	Tb427-100105500	0	0.00990099	1.18804e-09	0.737465	4.42307	FALSE	5404.41	0.259054	0.762941	2.59715	1.52604e-08	Late G1						Tb427-080040600	S
2419	Tb427-040015600	0	0.00990099	1.20431e-09	0.991669	4.37406	FALSE	9487.84	0.733003	0.455337	1.55428	1.54489e-08	Late G1						Tb427-080040700	Late G1
2600	Tb427-040033700	0	0.00990099	1.25257e-09	0.230164	4.25203	FALSE	2620.75	0.0884772	0.914567	3.69399	1.60256e-08	Late G1						Tb427-080040800	G2M
2100	Tb427-030038100	0	0.00990099	1.36526e-09	0.988759	4.0903	FALSE	1759.89	0.052624	0.948236	8.63926	1.7353e-08	Late G1						Tb427-080041000	G2M
4471	Tb427-070081200	0	0.00990099	1.54298e-09	0.567732	4.4171	FALSE	4161.37	0.170651	0.841503	2.75407	1.94841e-08	Late G1						Tb427-080041600	G2M
1314	Tb427-010009400	0	0.00990099	1.88547e-09	0.0958372	4.6668	FALSE	2263.26	0.072453	0.928997	6.14156	2.36244e-08	Late G1						Tb427-080041800	Late G1
3949	Tb427-070026100	6.92241e-06	0.00990099	1.92172e-09	0.986535	3.92741	FALSE	7693.76	0.479209	0.597343	1.68131	2.40166e-08	Late G1						Tb427-080042000:pseudogene	G2M
3548	Tb427-060035500	0	0.00990099	2.20703e-09	0.957437	4.44053	FALSE	3495.68	0.131962	0.876088	3.932	2.74056e-08	Late G1						Tb427-080042500	Early G1
3752	Tb427-070005400	0	0.00990099	2.47285e-09	0.806065	3.93623	FALSE	7022.16	0.402455	0.656894	1.95405	3.055e-08	Late G1						Tb427-080042700	G2M
4011	Tb427-070032300	0	0.00990099	2.732e-09	0.0200678	4.17171	FALSE	6512.71	0.350522	0.695144	1.81881	3.3411e-08	Late G1						Tb427-080042800	S
1285	Tb427-010006500	0	0.00990099	2.74839e-09	0.742083	4.65631	FALSE	8583.11	0.600452	0.520843	1.71313	3.35691e-08	Late G1						Tb427-080042900	Late G1
9384	Tb427-110180800	0	0.00990099	3.49766e-09	0.867798	4.34194	FALSE	2550.17	0.0847644	0.919377	4.75056	4.22946e-08	Late G1						Tb427-080043000	S
1780	Tb427-020031400	0	0.00990099	3.59475e-09	0.904282	4.07404	FALSE	4584.37	0.198131	0.81585	3.03851	4.33605e-08	Late G1						Tb427-080043300	Late G1
8088	Tb427-110042100	3.05877e-05	0.00990099	4.01493e-09	0.0726897	4.86215	FALSE	11096.7	1.13022	0.269354	1.61981	4.83087e-08	Late G1						Tb427-080043400	Late G1
3098	Tb427-050033700	0	0.00990099	4.05792e-09	0.925772	3.99834	FALSE	2782.25	0.0952109	0.90907	3.74088	4.87655e-08	Late G1						Tb427-080043900	Late G1
7677	Tb427-100167100	0	0.00990099	4.14724e-09	0.899416	4.18299	FALSE	5715.52	0.281973	0.745763	1.88946	4.97771e-08	Late G1						Tb427-080044100:pseudogene	S
4927	Tb427-080049400	0	0.00990099	4.35412e-09	0.820095	3.92424	FALSE	4074.82	0.16406	0.850664	1.86223	5.21312e-08	Late G1						Tb427-080044200	Late G1
4968	Tb427-080053900	0	0.00990099	4.40534e-09	0.510391	4.31613	FALSE	3967.39	0.160098	0.848374	3.16219	5.26794e-08	Late G1						Tb427-080044400	Early G1
1730	Tb427-020026400	0	0.00990099	4.97867e-09	0.27905	4.14723	FALSE	6344.83	0.335699	0.704993	2.05153	5.93159e-08	Late G1						Tb427-080044700	G2M
2274	Tb427-030056400	0	0.00990099	7.62699e-09	0.691011	4.28203	FALSE	3217.19	0.117292	0.886395	2.96672	8.96565e-08	Late G1						Tb427-080045300	S
873	Tb427-000736100	0	0.00990099	7.96374e-09	0.291384	4.11938	FALSE	1275.83	0.0343619	0.965644	9.59594	9.33886e-08	Late G1						Tb427-080045400	S
9226	Tb427-110164800	0	0.00990099	8.13046e-09	0.254304	4.30181	FALSE	3146.16	0.112997	0.893724	2.60397	9.51136e-08	Late G1						Tb427-080045900	S
8566	Tb427-110090100	3.03728e-05	0.00990099	8.25981e-09	0.709873	4.16142	FALSE	3825.6	0.149416	0.859368	2.51962	9.63943e-08	Late G1						Tb427-080046300	G2M
2901	Tb427-050013100	0	0.00990099	9.72407e-09	0.732767	4.4298	FALSE	2985.84	0.105698	0.899221	4.54585	1.12758e-07	Late G1						Tb427-080046800	S
3742	Tb427-060056000	0	0.00990099	1.00524e-08	0.886327	4.15432	FALSE	2747.13	0.0937284	0.912048	3.52018	1.16195e-07	Late G1						Tb427-080047000	S
5533	Tb427-090029500	6.23116e-07	0.00990099	1.01754e-08	0.909836	3.55257	FALSE	2680.33	0.0899819	0.914567	2.10749	1.17338e-07	Late G1						Tb427-080047200	Late G1
5020	Tb427-080059400	-1.7811e-07	0.00990099	1.0969e-08	0.348124	4.42766	FALSE	2597.12	0.0864348	0.916628	2.63767	1.26339e-07	Late G1						Tb427-080047300	S
7888	Tb427-110021700	0	0.00990099	1.28678e-08	0.178114	4.07425	FALSE	3636.3	0.14002	0.866239	3.04271	1.47334e-07	Late G1						Tb427-080048100	S
2601	Tb427-040033800	0	0.00990099	1.30462e-08	0.0950779	3.98039	FALSE	3015.07	0.106175	0.899908	3.71085	1.49201e-07	Late G1						Tb427-080048400	G2M
4467	Tb427-070080800	0	0.00990099	1.33261e-08	0.823749	4.82749	FALSE	2339.39	0.0757419	0.928081	4.12646	1.51864e-07	Late G1						Tb427-080048900	S
4794	Tb427-080036000	2.4758e-05	0.00990099	1.37829e-08	0.501266	4.37939	FALSE	10004	0.85862	0.375401	1.57853	1.56702e-07	Late G1						Tb427-080049200	G2M
3804	Tb427-070010600	0	0.00990099	1.55264e-08	0.921302	4.33111	FALSE	1757.37	0.0517989	0.949382	5.6848	1.75496e-07	Late G1						Tb427-080049400	Late G1
7133	Tb427-100108200	0	0.00990099	1.61634e-08	0.613376	4.5616	FALSE	2789.74	0.0968262	0.908383	5.1584	1.82483e-07	Late G1						Tb427-080049500	S
5745	Tb427-090051300	0	0.00990099	1.6812e-08	0.76473	4.15539	FALSE	2788.3	0.0957386	0.907467	3.42322	1.89584e-07	Late G1						Tb427-080050400	Late G1
1855	Tb427-030010800	0	0.00990099	1.69582e-08	0.41552	4.03038	FALSE	7213.16	0.425297	0.639487	2.00989	1.91012e-07	Late G1						Tb427-080050800	S
8001	Tb427-110033100	0	0.00990099	1.74836e-08	0.869385	4.50709	FALSE	3289.68	0.120646	0.885937	2.60544	1.96701e-07	Late G1						Tb427-080050900	S
3729	Tb427-060054700	0	0.00990099	1.78045e-08	0.340926	4.12836	FALSE	5697.96	0.281271	0.743701	1.87224	2.00079e-07	Late G1						Tb427-080051400	S
8644	Tb427-110099000	2.96323e-06	0.00990099	2.21525e-08	0.729696	4.34836	FALSE	3701.78	0.142842	0.86372	2.17662	2.46937e-07	Late G1						Tb427-080053500	S
1468	Tb427-010027100	1.00743e-05	0.00990099	2.47801e-08	0.892559	4.75525	FALSE	9097.25	0.661769	0.499313	1.62559	2.74962e-07	Late G1						Tb427-080053800	S
8680	Tb427-110102600	0	0.00990099	2.5029e-08	0.787086	4.88684	FALSE	1627	0.0467531	0.955108	5.06019	2.77407e-07	Late G1						Tb427-080053900	Late G1
5343	Tb427-090008300	0	0.00990099	3.58366e-08	0.295149	4.19464	FALSE	2081	0.0643426	0.936555	3.96842	3.93149e-07	Late G1						Tb427-080054000	Late G1
3520	Tb427-060032700	0	0.00990099	4.30513e-08	0.418175	4.41012	FALSE	3183.66	0.115279	0.892579	2.80095	4.66494e-07	Late G1						Tb427-080054300	Late G1
8789	Tb427-110120200	3.47793e-07	0.00990099	4.40148e-08	0.726381	3.93584	FALSE	4071.33	0.164617	0.845854	2.69843	4.7587e-07	Late G1						Tb427-080054800	G2M
3175	Tb427-050041400	3.30108e-08	0.00990099	4.80642e-08	0.634738	4.30981	FALSE	1448.54	0.0399311	0.960834	4.43669	5.17344e-07	Late G1						Tb427-080055400	G2M
6818	Tb427-100076000	0	0.00990099	4.88886e-08	0.753656	4.90679	FALSE	1930.17	0.0581927	0.942968	5.80573	5.25634e-07	Late G1						Tb427-080055500	S
5950	Tb427-090072800	0.000248358	0.00990099	6.859e-08	0.352812	4.68309	FALSE	9189.75	0.685956	0.475951	1.58527	7.27207e-07	Late G1						Tb427-080056700	S
6341	Tb427-100026200	0	0.00990099	7.63372e-08	0.837285	4.50405	FALSE	3675.23	0.141411	0.868301	3.51978	8.01211e-07	Late G1						Tb427-080057000:pseudogene	S
3965	Tb427-070027700	0	0.00990099	8.30975e-08	0.35114	4.10174	FALSE	3322.66	0.122692	0.882272	3.6238	8.68405e-07	Late G1						Tb427-080057400	G2M
3261	Tb427-050051600	2.8835e-06	0.00990099	9.60942e-08	0.310675	4.52869	FALSE	5728.54	0.28229	0.745076	1.72046	9.97774e-07	Late G1						Tb427-080057600	S
1641	Tb427-020017400	9.0362e-07	0.00990099	1.12809e-07	0.160682	4.57057	FALSE	2168.76	0.0674947	0.934494	4.1157	1.16262e-06	Late G1						Tb427-080058000	Early G1
3208	Tb427-050044700	7.95122e-07	0.00990099	1.17789e-07	0.444184	4.22265	FALSE	3897.16	0.154694	0.852268	2.03134	1.21009e-06	Late G1						Tb427-080058400	G2M
8696	Tb427-110104400	3.07055e-06	0.00990099	1.21255e-07	0.648555	4.37817	FALSE	6043.11	0.307628	0.727668	1.65529	1.24438e-06	Late G1						Tb427-080059400	Late G1
1654	Tb427-020018700	0	0.00990099	1.35153e-07	0.783277	3.85388	FALSE	5485.4	0.26292	0.762483	1.99771	1.3797e-06	Late G1						Tb427-080059800	Late G1
7797	Tb427-110012500	0	0.00990099	1.45467e-07	0.203847	4.62031	FALSE	3175.36	0.114648	0.890289	3.35729	1.47876e-06	Late G1						Tb427-080060500	S
5536	Tb427-090029800	7.73408e-07	0.00990099	1.54933e-07	0.883383	4.19163	FALSE	5826.32	0.290106	0.741182	1.78997	1.56677e-06	Late G1						Tb427-080061100	G2M
2569	Tb427-040030600	0	0.00990099	1.58868e-07	0.833328	4.39821	FALSE	3788.08	0.147928	0.860742	3.07298	1.60323e-06	Late G1						Tb427-080061700	Late G1
2279	Tb427-030056900	2.09354e-07	0.00990099	1.89585e-07	0.284461	4.47329	FALSE	5715.86	0.281388	0.747137	1.92226	1.89742e-06	Late G1						Tb427-080063700	S
7523	Tb427-100149800	0.000115642	0.00990099	1.96833e-07	0.611761	4.64498	FALSE	8597.47	0.598215	0.523362	1.87219	1.9659e-06	Late G1						Tb427-080064800	G2M
9251	Tb427-110167300	0	0.00990099	1.97367e-07	0.488485	4.75819	FALSE	2612.77	0.088774	0.915483	5.43133	1.96921e-06	Late G1						Tb427-080065100	S
2294	Tb427-030058400	0	0.00990099	1.99401e-07	0.90205	3.86013	FALSE	6302.7	0.333786	0.703161	1.97571	1.98726e-06	Late G1						Tb427-080066200	S
4726	Tb427-080029100	2.79437e-07	0.00990099	2.09109e-07	0.967128	4.19809	FALSE	3611.65	0.137505	0.870591	3.5346	2.07994e-06	Late G1						Tb427-080066400	Late G1
8257	Tb427-110059200	0	0.00990099	2.09964e-07	0.251914	4.29333	FALSE	2592.37	0.0866277	0.915025	3.48081	2.08448e-06	Late G1						Tb427-080066600	G2M
7152	Tb427-100110100	2.2622e-07	0.00990099	2.24565e-07	0.919093	4.00129	FALSE	5290.56	0.247441	0.774851	1.97736	2.22001e-06	Late G1						Tb427-080066800	G2M
4343	Tb427-070067500	0	0.00990099	2.47405e-07	0.220719	3.93194	FALSE	3881.59	0.152368	0.860055	3.01974	2.4334e-06	Late G1						Tb427-080068000	G2M
3679	Tb427-060049000	0	0.00990099	2.54059e-07	0.560422	1.00058	FALSE	6356.16	0.334708	0.71049	1.75131	2.49379e-06	Late G1						Tb427-080068100	S
5655	Tb427-090042300	0	0.00990099	2.82363e-07	0.938276	3.83405	FALSE	5321.32	0.248291	0.779661	2.0733	2.74935e-06	Late G1						Tb427-080068300	Late G1
3079	Tb427-050031800	1.51188e-07	0.00990099	2.9177e-07	0.949949	3.81813	FALSE	3074.22	0.108976	0.897618	3.13663	2.83567e-06	Late G1						Tb427-080068400	S
2211	Tb427-030049700	1.09353e-06	0.00990099	2.91812e-07	0.236152	3.86936	FALSE	5056.13	0.230409	0.787907	1.97633	2.83567e-06	Late G1						Tb427-080068700	Late G1
8975	Tb427-110139200	0	0.00990099	3.1126e-07	0.506186	4.6167	FALSE	2428.9	0.0794836	0.922355	3.25053	3.01558e-06	Late G1						Tb427-080069400	S
3033	Tb427-050026800	5.69255e-06	0.00990099	3.69729e-07	0.62857	4.3843	FALSE	1839.08	0.0540803	0.946633	4.66752	3.54312e-06	Late G1						Tb427-080069600	Early G1
9245	Tb427-110166700	1.02955e-06	0.00990099	3.71863e-07	0.647335	3.86754	FALSE	3458.5	0.129396	0.876546	2.40527	3.56005e-06	Late G1						Tb427-080069900	Late G1
1660	Tb427-020019300	0	0.00990099	3.89592e-07	0.645497	4.25765	FALSE	2509.2	0.0832687	0.918232	5.8443	3.71511e-06	Late G1						Tb427-080070700	G2M
7913	Tb427-110024200	2.65977e-05	0.00990099	4.06395e-07	0.798667	4.25622	FALSE	2127.85	0.0652941	0.938158	2.74294	3.85638e-06	Late G1						Tb427-080072700	Late G1
4472	Tb427-070081300	0	0.00990099	4.09735e-07	0.624638	4.17646	FALSE	2262.68	0.0718334	0.929684	3.60306	3.88427e-06	Late G1						Tb427-080072900	G2M
9125	Tb427-110154700	6.09541e-06	0.00990099	4.161e-07	0.873306	3.92493	FALSE	3735.43	0.144534	0.86372	2.73006	3.94075e-06	Late G1						Tb427-080073200	G2M
4257	Tb427-070058700	2.0623e-07	0.00990099	4.17616e-07	0.546925	4.37579	FALSE	3194.13	0.115159	0.890747	2.17074	3.95126e-06	Late G1						Tb427-080073300	S
4301	Tb427-070063100	7.00455e-08	0.00990099	4.19566e-07	0.40489	4.3148	FALSE	2506.73	0.0824571	0.919835	3.60123	3.96584e-06	Late G1						Tb427-080073600	G2M
4157	Tb427-070048700	0	0.00990099	4.2266e-07	0.657725	3.97434	FALSE	3461.58	0.129925	0.877004	2.28689	3.9912e-06	Late G1						Tb427-080073800	Early G1
9270	Tb427-110169200	0	0.00990099	4.24662e-07	0.921999	4.83521	FALSE	3929.7	0.156151	0.855016	2.7767	4.0062e-06	Late G1						Tb427-080073900	Late G1
1345	Tb427-010012500	2.323e-06	0.00990099	4.69024e-07	0.198107	4.04562	FALSE	3706.91	0.141946	0.868759	2.00008	4.40329e-06	Late G1						Tb427-080074700	G2M
4246	Tb427-070057600	4.87973e-07	0.00990099	4.97358e-07	0.53884	3.50059	FALSE	3051.95	0.108273	0.896473	2.507	4.64232e-06	Late G1						Tb427-080075000	S
2634	Tb427-040037500	4.41567e-05	0.00990099	5.11149e-07	0.874749	4.37386	FALSE	3344.51	0.12296	0.88273	2.44874	4.76646e-06	Late G1						Tb427-080076100	S
5237	Tb427-080081200	0	0.00990099	5.35107e-07	0.775981	4.66737	FALSE	2433.01	0.0793753	0.924416	5.42078	4.97552e-06	Late G1						Tb427-080077000	Late G1
9217	Tb427-110163900	8.08439e-07	0.00990099	5.99082e-07	0.95942	3.86191	FALSE	6764.34	0.376699	0.672927	1.78545	5.50179e-06	Late G1						Tb427-080077100	Late G1
3120	Tb427-050035900	0.000142809	0.00990099	6.42912e-07	0.771844	4.73561	FALSE	5697.08	0.280471	0.743014	2.10586	5.85993e-06	Late G1						Tb427-080077400	S
8117	Tb427-110045000	0	0.00990099	6.49289e-07	0.65567	3.81806	FALSE	2819.94	0.0970272	0.906551	3.13836	5.91249e-06	Late G1						Tb427-080078700	Late G1
114	Tb427-000108500	0	0.00990099	6.73362e-07	0.18534	4.33493	FALSE	950.205	0.0236968	0.977554	13.3897	6.12021e-06	Late G1						Tb427-080078800	S
9410	Tb427-110183500	5.44542e-06	0.00990099	6.94379e-07	0.69272	3.59288	FALSE	3832.16	0.150461	0.856848	2.26867	6.30533e-06	Late G1						Tb427-080078900	Late G1
1868	Tb427-030012100	0	0.00990099	7.05391e-07	0.298072	3.85263	FALSE	3241.78	0.117935	0.887769	3.03411	6.38738e-06	Late G1						Tb427-080079400	G2M
2921	Tb427-050015100	0	0.00990099	7.14318e-07	0.591582	4.71942	FALSE	1767.82	0.0515613	0.950527	3.73603	6.45616e-06	Late G1						Tb427-080080000	Late G1
4264	Tb427-070059400:pseudogene	7.80912e-07	0.00990099	7.42697e-07	0.830887	4.16808	FALSE	4251.8	0.175039	0.838525	1.95591	6.7064e-06	Late G1						Tb427-080080900	G2M
1912	Tb427-030016500	6.29396e-05	0.00990099	7.58125e-07	0.92838	4.53829	FALSE	5723.81	0.280725	0.747595	1.77668	6.83935e-06	Late G1						Tb427-080081200	Late G1
574	Tb427-000636500:pseudogene	0.000298345	0.00990099	8.17697e-07	0.679834	3.59281	FALSE	1245.31	0.0325423	0.969079	4.65825	7.36307e-06	Late G1						Tb427-080081700	S
6904	Tb427-100084700	2.25665e-06	0.00990099	8.33036e-07	0.504751	3.44137	FALSE	5647.39	0.273536	0.757444	1.52038	7.48729e-06	Late G1						Tb427-080082600:pseudogene	Late G1
8313	Tb427-110064800	0	0.00990099	9.00432e-07	0.454587	4.76467	FALSE	1589.65	0.0449485	0.956253	4.59221	8.04829e-06	Late G1						Tb427-080083400	S
8202	Tb427-110053700	3.70311e-07	0.00990099	9.5113e-07	0.446989	3.25544	FALSE	5145.76	0.236885	0.783326	1.6743	8.47799e-06	Late G1						Tb427-080083500	S
2509	Tb427-040024600	1.87822e-05	0.00990099	9.57326e-07	0.588039	3.78053	FALSE	7267.01	0.427313	0.637884	1.59709	8.52539e-06	Late G1						Tb427-080084600	S
6540	Tb427-100046600	1.98171e-06	0.00990099	1.0542e-06	0.876072	4.11891	FALSE	2351.06	0.0750621	0.927623	3.24788	9.35376e-06	Late G1						Tb427-080084800	S
5398	Tb427-090015100	5.87497e-06	0.00990099	1.0748e-06	0.816723	4.38432	FALSE	4266.05	0.175406	0.839212	1.88634	9.51909e-06	Late G1						Tb427-080085100	G2M
3420	Tb427-060020000	0	0.00990099	1.10101e-06	0.138833	3.95688	FALSE	2603.98	0.0867539	0.916399	4.22758	9.72461e-06	Late G1						Tb427-080085200	S
9255	Tb427-110167700	0	0.00990099	1.15065e-06	0.298723	4.86785	FALSE	3671.36	0.141207	0.867842	3.10822	1.01445e-05	Late G1						Tb427-080085400	G2M
2820	Tb427-040057100	2.08166e-06	0.00990099	1.19546e-06	0.133617	4.00512	FALSE	4492.46	0.19262	0.815621	2.56137	1.05109e-05	Late G1						Tb427-080085800	Late G1
3450	Tb427-060024100	1.50233e-05	0.00990099	1.19909e-06	0.561928	4.06222	FALSE	3586.03	0.136885	0.866697	2.13257	1.05333e-05	Late G1						Tb427-080086000	Late G1
5853	Tb427-090062500	6.01289e-06	0.00990099	1.26315e-06	0.34174	4.36162	FALSE	2735.17	0.0927342	0.909528	3.93577	1.1086e-05	Late G1						Tb427-080086300:pseudogene	S
1513	Tb427-010032000	0	0.00990099	1.30027e-06	0.0227513	4.60949	FALSE	2251.1	0.0710758	0.931516	5.2447	1.14015e-05	Late G1						Tb427-080087000	S
5378	Tb427-090012800	4.20636e-05	0.00990099	1.31812e-06	0.875112	3.3248	FALSE	7624.01	0.46044	0.62437	1.5134	1.15267e-05	Late G1						Tb427-080087100	S
7223	Tb427-100118400	0	0.00990099	1.39696e-06	0.330216	4.3474	FALSE	2337.12	0.0748445	0.927393	5.46159	1.21832e-05	Late G1						Tb427-080087400	G2M
7440	Tb427-100140700	2.24262e-05	0.00990099	1.48384e-06	0.148019	4.12928	FALSE	6634	0.35863	0.693312	1.85755	1.28945e-05	Late G1						Tb427-080088300	G2M
4400	Tb427-070073300	0	0.00990099	1.4892e-06	0.929413	4.66883	FALSE	2456.04	0.0803956	0.921667	7.02097	1.29295e-05	Late G1						Tb427-080088800	G2M
6628	Tb427-100055500	1.22242e-06	0.00990099	1.61597e-06	0.885512	3.96389	FALSE	3455.13	0.128931	0.877462	2.4525	1.39777e-05	Late G1						Tb427-080088900	G2M
4040	Tb427-070037000	6.01457e-06	0.00990099	1.62075e-06	0.493092	3.9181	FALSE	4801.71	0.211558	0.805314	1.92548	1.3984e-05	Late G1						Tb427-080089000:pseudogene	S
4851	Tb427-080041800	4.49111e-07	0.00990099	1.6559e-06	0.288793	4.37956	FALSE	4500.86	0.193088	0.816995	2.902	1.42746e-05	Late G1						Tb427-090005000	S
4364	Tb427-070069600	9.70382e-06	0.00990099	1.68956e-06	0.512296	3.68554	FALSE	3378.43	0.125254	0.878836	2.39185	1.45073e-05	Late G1						Tb427-090005500	Early G1
3607	Tb427-060041400	1.61932e-05	0.00990099	1.73556e-06	0.237838	3.97545	FALSE	7197.16	0.423827	0.633761	1.70789	1.48557e-05	Late G1						Tb427-090006300	G2M
7628	Tb427-100161000	9.95192e-07	0.00990099	1.89515e-06	0.67827	3.87021	FALSE	4058.7	0.164595	0.842877	2.07089	1.61646e-05	Late G1						Tb427-090006600	Late G1
9271	Tb427-110169300	0.000107839	0.00990099	1.90187e-06	0.712534	4.06316	FALSE	4329.97	0.180046	0.831883	1.74105	1.61935e-05	Late G1						Tb427-090007300	S
5351	Tb427-090009100	4.13841e-06	0.00990099	1.99186e-06	0.484724	4.29927	FALSE	2173.34	0.0674127	0.935181	3.62185	1.69003e-05	Late G1						Tb427-090007800	Late G1
6808	Tb427-100074200	1.30748e-07	0.00990099	2.00625e-06	0.37762	4.13372	FALSE	2276.66	0.0721549	0.929913	3.70968	1.70075e-05	Late G1						Tb427-090008000	Late G1
5894	Tb427-090066600	2.21701e-06	0.00990099	2.0755e-06	0.527044	4.11638	FALSE	2084.49	0.0639334	0.937471	4.02259	1.75415e-05	Late G1						Tb427-090008100	S
4321	Tb427-070065100	7.84658e-07	0.00990099	2.09382e-06	0.763759	3.81207	FALSE	1855.62	0.0548945	0.947549	5.40378	1.76726e-05	Late G1						Tb427-090008300	Late G1
7950	Tb427-110028000	6.96362e-06	0.00990099	2.13196e-06	0.176687	4.18395	FALSE	2125.63	0.065415	0.936555	3.79011	1.79789e-05	Late G1						Tb427-090008400	S
4133	Tb427-070046300	2.22381e-06	0.00990099	2.16324e-06	0.530532	3.61257	FALSE	2858.28	0.0988138	0.903573	2.97336	1.81795e-05	Late G1						Tb427-090009000	S
7619	Tb427-100160100	9.80684e-05	0.00990099	2.27294e-06	0.418885	4.66332	FALSE	7274.77	0.428705	0.635822	1.69599	1.90354e-05	Late G1						Tb427-090009100	Late G1
4538	Tb427-080007800	0	0.00990099	2.31425e-06	0.0338406	4.0433	FALSE	2355.8	0.0757865	0.926019	2.56744	1.93313e-05	Late G1						Tb427-090011400	G2M
2261	Tb427-030055100	2.08045e-07	0.00990099	2.4344e-06	0.563393	3.85781	FALSE	2739.56	0.0930365	0.910444	3.31645	2.02825e-05	Late G1						Tb427-090011700	Late G1
1466	Tb427-010026900	0	0.00990099	2.51287e-06	0.535827	4.12287	FALSE	7092.55	0.407158	0.656436	1.52288	2.08646e-05	Late G1						Tb427-090012000	Late G1
1799	Tb427-030005200	8.21089e-06	0.00990099	2.52812e-06	0.803809	3.83018	FALSE	3949.25	0.157533	0.84929	2.50005	2.09553e-05	Late G1						Tb427-090012800	Late G1
8871	Tb427-110128400	5.90117e-05	0.00990099	2.73382e-06	0.977505	3.79209	FALSE	4310.11	0.179231	0.831425	1.87772	2.25831e-05	Late G1						Tb427-090013700	Late G1
8967	Tb427-110138400	1.35477e-05	0.00990099	2.74747e-06	0.51419	3.94617	FALSE	2599.6	0.0858729	0.918461	3.1201	2.26765e-05	Late G1						Tb427-090014500	S
8404	Tb427-110073900	6.17307e-06	0.00990099	2.8679e-06	0.741176	4.46618	FALSE	3216.76	0.115788	0.891434	2.8175	2.36103e-05	Late G1						Tb427-090014600	G2M
1608	Tb427-020013800	1.45595e-05	0.00990099	2.88629e-06	0.930932	4.44688	FALSE	1706.07	0.0488868	0.952359	5.09178	2.37214e-05	Late G1						Tb427-090014900	G2M
6534	Tb427-100046000	0	0.00990099	3.42966e-06	0.628725	3.9158	FALSE	3754.61	0.14583	0.864178	3.35945	2.79738e-05	Late G1						Tb427-090015000	S
9248	Tb427-110167000	0	0.00990099	3.71141e-06	0.98586	4.59049	FALSE	1852.95	0.0549297	0.946862	3.96321	3.00947e-05	Late G1						Tb427-090015100	Late G1
4455	Tb427-070079600	1.75252e-05	0.00990099	3.744e-06	0.585794	4.42853	FALSE	3779.14	0.146591	0.862803	2.3169	3.03336e-05	Late G1						Tb427-090016200	S
6632	Tb427-100055900	6.65094e-05	0.00990099	4.294e-06	0.149237	3.46922	FALSE	4998.11	0.225431	0.793175	1.70862	3.4439e-05	Late G1						Tb427-090016400	S
4797	Tb427-080036300	2.27298e-06	0.00990099	4.30381e-06	0.228837	3.55749	FALSE	2873.27	0.0993516	0.904489	3.69023	3.4466e-05	Late G1						Tb427-090017300	S
1886	Tb427-030013900	9.51238e-07	0.00990099	4.72194e-06	0.819388	3.81997	FALSE	3887.46	0.153471	0.856848	2.34695	3.76281e-05	Late G1						Tb427-090018600	S
9406	Tb427-110183100	1.3996e-07	0.00990099	5.31243e-06	0.850947	3.85582	FALSE	4452.73	0.188774	0.823866	2.38525	4.20915e-05	Late G1						Tb427-090018900	S
7595	Tb427-100157000	1.08023e-06	0.00990099	5.43259e-06	0.790168	4.06596	FALSE	3214.75	0.116705	0.886395	2.3193	4.29733e-05	Late G1						Tb427-090019200	S
4830	Tb427-080039600	1.60384e-05	0.00990099	5.59844e-06	0.917352	4.92018	FALSE	2874.27	0.0991486	0.904489	2.31248	4.42131e-05	Late G1						Tb427-090019400	S
7851	Tb427-110017900	0	0.00990099	5.72622e-06	0.968492	4.10454	FALSE	3576.98	0.136286	0.870133	2.877	4.51487e-05	Late G1						Tb427-090020600	S
3075	Tb427-050031400	3.31475e-05	0.00990099	5.98768e-06	0.714244	4.35741	FALSE	5564.14	0.267022	0.76088	1.58806	4.70572e-05	Late G1						Tb427-090021500	Late G1
8427	Tb427-110076200	8.39967e-06	0.00990099	6.36618e-06	0.279125	3.70067	FALSE	1329.76	0.0356342	0.96404	5.63034	4.98299e-05	Late G1						Tb427-090021600	G2M
3550	Tb427-060035700	5.13652e-05	0.00990099	7.61455e-06	0.738025	3.79736	FALSE	2244.32	0.0701367	0.93312	2.96608	5.90295e-05	Late G1						Tb427-090022100	S
2871	Tb427-050010000	1.86294e-05	0.00990099	7.69436e-06	0.129594	3.81893	FALSE	2981.33	0.104354	0.89945	2.87631	5.96006e-05	Late G1						Tb427-090023500	S
1038	Tb427-000781200:pseudogene	2.08324e-06	0.00990099	7.73002e-06	0.523955	3.99353	FALSE	2653.79	0.0891091	0.912506	3.28918	5.9829e-05	Late G1						Tb427-090024800	G2M
1574	Tb427-020010200	5.07608e-05	0.00990099	8.40942e-06	0.312786	3.82116	FALSE	2382.5	0.0760779	0.927623	3.4301	6.48287e-05	Late G1						Tb427-090024900	S
3640	Tb427-060044700	3.76739e-06	0.00990099	8.76101e-06	0.298059	4.28969	FALSE	2477.57	0.0805373	0.922813	2.82843	6.7432e-05	Late G1						Tb427-090025700	G2M
4633	Tb427-080019700	7.96067e-05	0.00990099	8.78982e-06	0.288216	3.98502	FALSE	3804.29	0.148471	0.858681	2.0258	6.75465e-05	Late G1						Tb427-090025900	G2M
6895	Tb427-100083800	0.000133807	0.00990099	8.86518e-06	0.159672	4.50115	FALSE	2292.11	0.0721422	0.931058	3.03057	6.80178e-05	Late G1						Tb427-090026400	S
1813	Tb427-030006600	3.59925e-07	0.00990099	9.48148e-06	0.385351	4.06941	FALSE	5304.69	0.249958	0.768667	1.98473	7.22749e-05	Late G1						Tb427-090026500	G2M
3152	Tb427-050039100	2.28646e-06	0.00990099	9.67213e-06	0.5594	3.95708	FALSE	4234.89	0.173846	0.839212	2.19527	7.33962e-05	Late G1						Tb427-090027800	S
4972	Tb427-080054300	3.35828e-07	0.00990099	1.01444e-05	0.676465	4.24419	FALSE	1632.93	0.0464362	0.953733	6.1509	7.668e-05	Late G1						Tb427-090028000	S
3623	Tb427-060043000	1.55491e-06	0.00990099	1.03808e-05	0.400039	3.67568	FALSE	4849.68	0.214885	0.803252	1.56098	7.83448e-05	Late G1						Tb427-090028100	Late G1
446	Tb427-000497700	6.20093e-07	0.00990099	1.12398e-05	0.0261015	4.04104	FALSE	3771.74	0.146128	0.863491	2.58784	8.43685e-05	Late G1						Tb427-090028400	Late G1
6459	Tb427-100038500	7.6713e-05	0.00990099	1.22702e-05	0.479081	4.77724	FALSE	5672.27	0.27682	0.75126	2.41798	9.15355e-05	Late G1						Tb427-090028700	Late G1
6214	Tb427-100013000	2.84978e-06	0.00990099	1.26169e-05	0.157255	3.77839	FALSE	3851.35	0.151192	0.857765	2.48118	9.40497e-05	Late G1						Tb427-090028800	G2M
1386	Tb427-010016700	2.68986e-05	0.00990099	1.27828e-05	0.754137	3.7793	FALSE	8349.9	0.557886	0.553596	1.59636	9.52129e-05	Late G1						Tb427-090028900	G2M
3916	Tb427-070022200	6.78171e-06	0.00990099	1.28983e-05	0.669147	4.36841	FALSE	5022.38	0.226303	0.794778	1.64704	9.58805e-05	Late G1						Tb427-090029200	Late G1
8477	Tb427-110081200	6.28253e-05	0.00990099	1.31607e-05	0.816818	4.52931	FALSE	4706.4	0.204896	0.810353	2.0743	9.75786e-05	Late G1						Tb427-090029500	Late G1
5212	Tb427-080078700	0.000434358	0.00990099	1.37769e-05	0.735533	3.65468	FALSE	1771.05	0.0510237	0.950985	3.12702	0.000101755	Late G1						Tb427-090029800	Late G1
6371	Tb427-100029200	0.000155989	0.00990099	1.38464e-05	0.394347	4.2381	FALSE	4941.83	0.221475	0.796152	1.57314	0.000102116	Late G1						Tb427-090030400	S
306	Tb427-000286400	3.32602e-06	0.00990099	1.51412e-05	0.917098	3.98347	FALSE	2473.9	0.0807758	0.920751	3.8227	0.000110906	Late G1						Tb427-090030500	G2M
4357	Tb427-070068900	3.0718e-06	0.00990099	1.63445e-05	0.599159	4.18154	FALSE	3329.64	0.122161	0.883417	2.31691	0.000119001	Late G1						Tb427-090030900	Late G1
8049	Tb427-110038000	3.2096e-05	0.00990099	1.70894e-05	0.930297	4.74815	FALSE	3309.16	0.121004	0.884792	2.03787	0.000124145	Late G1						Tb427-090031800	G2M
1619	Tb427-020015200	0.000137872	0.00990099	1.71916e-05	0.0230929	3.55933	FALSE	1711.23	0.0490001	0.951214	3.28526	0.000124793	Late G1						Tb427-090032000	G2M
3386	Tb427-060016600	9.4194e-06	0.00990099	1.75065e-05	0.474512	3.75793	FALSE	2843.4	0.097883	0.904947	3.78544	0.000126984	Late G1						Tb427-090032500	Late G1
7673	Tb427-100165500	0.000131397	0.00990099	1.96416e-05	0.764032	3.93608	FALSE	3207.45	0.115652	0.888456	2.69393	0.000141729	Late G1						Tb427-090034100	S
8913	Tb427-110132900	0.000135192	0.00990099	2.1355e-05	0.654898	4.01619	FALSE	2149.06	0.066362	0.934265	3.20242	0.000152729	Late G1						Tb427-090034200	G2M
6634	Tb427-100056100	9.67537e-07	0.00990099	2.15688e-05	0.868275	3.98829	FALSE	3801.16	0.148161	0.860742	2.27819	0.000154145	Late G1						Tb427-090034500	S
6143	Tb427-100005900	7.58223e-05	0.00990099	2.16266e-05	0.846107	4.3705	FALSE	1779.42	0.0514632	0.950298	2.96954	0.000154444	Late G1						Tb427-090034600	Early G1
6391	Tb427-100031200	0.000109976	0.00990099	2.20531e-05	0.224772	4.16882	FALSE	2223.03	0.0692873	0.932891	3.47777	0.000157374	Late G1						Tb427-090034800	G2M
2473	Tb427-040021000	2.45238e-06	0.00990099	2.20787e-05	0.163114	3.96021	FALSE	6201.29	0.321882	0.715987	2.10042	0.00015744	Late G1						Tb427-090034900	G2M
5370	Tb427-090012000	0.000352274	0.00990099	2.35112e-05	0.880945	4.64457	FALSE	2669.14	0.0889309	0.914338	2.02582	0.000167286	Late G1						Tb427-090035300	G2M
8907	Tb427-110132300	1.90687e-05	0.00990099	2.37623e-05	0.907753	4.47074	FALSE	2445.74	0.079165	0.923042	4.03493	0.000168702	Late G1						Tb427-090036300	G2M
1372	Tb427-010015200	0.000667911	0.00990099	2.43807e-05	0.483988	3.84872	FALSE	4245.05	0.174126	0.837838	2.4529	0.000172839	Late G1						Tb427-090037700	Early G1
6436	Tb427-100036200	2.30576e-06	0.00990099	2.69063e-05	0.222274	3.89975	FALSE	1882.06	0.0558562	0.945488	5.62536	0.000189359	Late G1						Tb427-090038100	S
1827	Tb427-030008000	0.000126761	0.00990099	2.7285e-05	0.808309	3.87049	FALSE	2587.42	0.0854069	0.917087	2.66308	0.000191469	Late G1						Tb427-090039000	S
7849	Tb427-110017700	0.000138494	0.00990099	2.88291e-05	0.263335	4.61781	FALSE	2395.26	0.0767435	0.92579	2.37254	0.000201285	Late G1						Tb427-090039700	Late G1
8290	Tb427-110062500	3.14255e-05	0.00990099	2.93155e-05	0.00957428	4.50302	FALSE	3379.98	0.124348	0.882959	2.17068	0.0002038	Late G1						Tb427-090039800	G2M
7227	Tb427-100118800	0.000120057	0.00990099	3.09207e-05	0.62525	3.65399	FALSE	3190.08	0.114584	0.890747	2.26103	0.000214345	Late G1						Tb427-090042300	Late G1
5688	Tb427-090045600	0.00033351	0.00990099	3.09545e-05	0.263495	4.76912	FALSE	4006.22	0.158983	0.853642	1.95182	0.000214426	Late G1						Tb427-090042800	G2M
1279	Tb427-010005900	2.07786e-06	0.00990099	3.11478e-05	0.79135	4.07205	FALSE	1935.93	0.0578611	0.943656	3.76108	0.000215458	Late G1						Tb427-090043700	S
5519	Tb427-090028100	0.000157583	0.00990099	3.21757e-05	0.918127	3.92644	FALSE	2609.78	0.0867839	0.914338	3.04108	0.000221619	Late G1						Tb427-090045500	G2M
7127	Tb427-100107600	1.57652e-06	0.00990099	3.71744e-05	0.33525	3.74008	FALSE	2766.21	0.0943768	0.907696	3.57728	0.000253886	Late G1						Tb427-090045600	Late G1
2689	Tb427-040043200	7.21866e-05	0.00990099	3.72613e-05	0.928118	3.55921	FALSE	7002.86	0.397542	0.661246	1.70949	0.0002543	Late G1						Tb427-090045700	S
7918	Tb427-110024700	0.000242147	0.00990099	3.74494e-05	0.0810769	3.8814	FALSE	2012.31	0.0608076	0.938846	2.27493	0.000255279	Late G1						Tb427-090045800	G2M
7442	Tb427-100140900	0.000718619	0.00990099	3.88466e-05	0.995547	3.7046	FALSE	4084.62	0.164035	0.847229	1.83517	0.000264021	Late G1						Tb427-090046100	Late G1
8200	Tb427-110053500	4.49719e-05	0.00990099	3.96874e-05	0.218786	4.43884	FALSE	2962.2	0.103109	0.901512	2.97264	0.000269341	Late G1						Tb427-090046700	S
[truncated: 831 more rows]

## Sheet: Phase peak per gene
Average expression of each CCR gene across cell for each phase (Early G1, Late G1, S and G2M). The phase with highest average expression is indicated in coloum "peak phase"
[truncated: 1,865 more rows]

[truncated: 2 more sheets: Crozier comparison, Benz comparison]
