# Supplementary material for: Profiling the bloodstream form and procyclic form Trypanosoma brucei cell cycle using single-cell transcriptomics
Source: eLife. 2023 May 11;12:e86325. doi: 10.7554/eLife.86325 (PMC10212563; doi:10.7554/eLife.86325)
Supplement: Supplementary file 6. — (Tab 1) CCR comparison between BSF and PCF. (Tab 2) Comparison of peak expression between BSF and PCF. (Tab 3) Ortholog groups and conservation of common CCR genes. (Tab 4) Comparison of CCR genes and cell cycle defects. (Tab 5) Early G1 phase associated GO terms. (Tab 6) Late G1 phase associated GO terms. (Tab 7) S phase associated GO terms. (Tab 8) G2M phase associated GO terms. (Tab 9) Plotted GO terms (Tab 10) CCR RNA-binding proteins. [file elife-86325-supp6.xlsx]

## Sheet: CCR form comparison
Each CCR genes for PCF and BSF cell cycles are listed, with the mean logFC and BH adjusted p-value for each form.
CCR form indicates if a gene is CCR (adjusted p-value <0.05, FC >1.5) in both forms, only PCF or only BSf
P-value <0.01 and FC > 1.5 indicated if a gene reached these threshold in both forms, only PCF or only BSF
gene	BSF meanlogFC	BSF BHadjust.pvalue	PCF meanlogFC	PCF BHadjusted.pvalue	CCR form	p-value < 0.01	FC > 1.5				Gene ID	Gene ID	source_id	Product Description	Input Ortholog(s)	Gene Name or Symbol	CCR form
Tb427-080009600	22.5846	2.35246e-19	219.449	9.06855e-65	both	both	both				Tb427_010011900	Tb427-010011900	Tb427_010011900.1	hypothetical protein, conserved	Tb927.1.1500	N/A	#N/A
Tb427-100170300	93.9375	4.93015e-47	99.3488	1.31637e-101	both	both	both				Tb427_010020000	Tb427-010020000	Tb427_010020000.1	hypothetical protein, conserved	Tb927.1.2600	N/A	both
Tb427-030008400	64.6966	3.61251e-69	76.7404	1.86466e-173	both	both	both				Tb427_010022300	Tb427-010022300	Tb427_010022300.1	hypothetical protein, conserved	Tb927.1.3070	N/A	#N/A
Tb427-100096900	31.419	1.14353e-71	70.7067	3.20026e-173	both	both	both				Tb427_010031000	Tb427-010031000	Tb427_010031000.1	hypothetical protein, conserved	Tb927.1.4650	N/A	#N/A
Tb427-080009800	11.9524	3.26884e-79	53.9068	1.36859e-230	both	both	both				Tb427_020017700	Tb427-020017700	Tb427_020017700.1	RNA recognition motif. (a.k.a. RRM, RBD, or RNP domain), putative	Tb927.2.3880	N/A	#N/A
Tb427-070054200	43.3467	1.4966e-59	51.6805	6.40051e-152	both	both	both				Tb427_020022600	Tb427-020022600	Tb427_020022600.1	RNA recognition motif. (a.k.a. RRM, RBD, or RNP domain)/Zinc knuckle, putative	Tb927.2.4710	N/A	#N/A
Tb427-100096800	28.6742	1.72991e-68	50.4303	2.30593e-185	both	both	both				Tb427_020031800	Tb427-020031800	Tb427_020031800.1	Zn-finger in Ran binding protein and others, putative	Tb927.2.6070	N/A	#N/A
Tb427-100112800	201.557	1.64951e-17	42.6717	2.00911e-38	both	both	both				Tb427_030008400	Tb427-030008400	Tb427_030008400.1	Histone RNA hairpin-binding protein RNA-binding domain containing protein, putative	Tb927.3.870	N/A	both
Tb427-090011700	31.6634	4.26525e-25	41.771	6.91322e-68	both	both	both				Tb427_030010100	Tb427-030010100	Tb427_030010100.1	hypothetical protein, conserved	Tb927.3.1030	N/A	#N/A
Tb427-070060500	28.6151	1.349e-64	41.3874	6.55338e-136	both	both	both				Tb427_030015600	Tb427-030015600	Tb427_030015600.1	Predicted ATPase of the ABC class, putative	Tb927.3.1590	N/A	#N/A
Tb427-100090100	30.9417	8.98313e-60	37.8809	8.47538e-126	both	both	both				Tb427_030018800	Tb427-030018800	Tb427_030018800.1	Histone RNA hairpin-binding protein RNA-binding domain containing protein, putative	Tb927.3.1910	N/A	both
Tb427-050041100	28.0431	2.77904e-30	37.7032	7.12139e-61	both	both	both				Tb427_030031900	Tb427-030031900	Tb427_030031900.1	SAM domain (Sterile alpha motif), putative	Tb927.3.3130	N/A	#N/A
Tb427-110103400	10.153	1.87523e-12	36.9651	3.89904e-62	both	both	both				Tb427_030042200	Tb427-030042200	Tb427_030042200.1	RNA recognition motif. (a.k.a. RRM, RBD, or RNP domain), putative	Tb927.3.3940	N/A	#N/A
Tb427-070058900	26.9597	1.55206e-57	36.936	5.69187e-116	both	both	both				Tb427_030043200	Tb427-030043200	Tb427_030043200.1	hypothetical protein, conserved	Tb927.3.4030	N/A	#N/A
Tb427-100016600:pseudogene	30.3265	6.16763e-52	35.5842	1.30183e-82	both	both	both				Tb427_030053900	Tb427-030053900	Tb427_030053900.1	Ribosomal protein L4/L1 family/60S ribosomal protein L4 C-terminal domain containing protein, putative	Tb927.3.5050	N/A	#N/A
Tb427-020024900	30.8457	2.92578e-36	30.3504	3.40246e-92	both	both	both				Tb427_030054000	Tb427-030054000	Tb427_030054000.1	Ribosomal protein L4/L1 family/60S ribosomal protein L4 C-terminal domain containing protein, putative	Tb927.3.5050	N/A	#N/A
Tb427-090007800	17.0395	3.62277e-21	28.1688	1.07577e-50	both	both	both				Tb427_040005900	Tb427-040005900	Tb427_040005900.1	RNA recognition motif. (a.k.a. RRM, RBD, or RNP domain), putative	Tb927.4.400	N/A	#N/A
Tb427-090005000	18.8802	6.01445e-09	25.873	1.21773e-32	both	both	both				Tb427_040006000	Tb427-040006000	Tb427_040006000.1	Cell differentiation family, Rcd1-like, putative	Tb927.4.410	N/A	BSF
Tb427-070079100	19.3441	4.03388e-31	24.3014	1.57369e-82	both	both	both				Tb427_040006600	Tb427-040006600	Tb427_040006600.1	Gar1/Naf1 RNA binding region containing protein, putative	Tb927.4.470	N/A	BSF
Tb427-110183600	17.0451	6.90206e-116	23.3127	3.58827e-240	both	both	both				Tb427_040021600	Tb427-040021600	Tb427_040021600.1	RNA recognition motif. (a.k.a. RRM, RBD, or RNP domain), putative	Tb927.4.1930	N/A	#N/A
Tb427-070034600	23.2677	2.3424e-68	23.0433	3.6329e-221	both	both	both				Tb427_040022600	Tb427-040022600	Tb427_040022600.1	Alba, putative	Tb927.4.2030	N/A	#N/A
Tb427-100112000	161.628	1.26518e-106	22.2639	2.63742e-158	both	both	both				Tb427_040022700	Tb427-040022700	Tb427_040022700.1	Alba, putative	Tb927.4.2040	N/A	#N/A
Tb427-100112200	231.035	3.14825e-196	21.4267	1.49593e-204	both	both	both				Tb427_040036800	Tb427-040036800	Tb427_040036800.1	hypothetical protein, conserved	Tb927.4.3400	N/A	BSF
Tb427-080021800	5.89548	2.60858e-15	20.3694	4.62019e-31	both	both	both				Tb427_040041800	Tb427-040041800	Tb427_040041800.1	Helicase conserved C-terminal domain containing protein, putative	Tb927.4.3890	N/A	#N/A
Tb427-080038900	12.6569	1.30721e-11	20.1359	4.24508e-32	both	both	both				Tb427_040048300	Tb427-040048300	Tb427_040048300.1	'Cold-shock' DNA-binding domain containing protein, putative	Tb927.4.4520	N/A	#N/A
Tb427-110023600	29.8695	5.4615e-78	19.7024	2.46869e-187	both	both	both				Tb427_040048900	Tb427-040048900	Tb427_040048900.1	hypothetical protein, conserved	Tb927.4.4580	N/A	#N/A
Tb427-060039600	16.3034	1.43236e-22	19.1556	1.81075e-36	both	both	both				Tb427_050021600	Tb427-050021600	Tb427_050021600.1	Zinc finger C-x8-C-x5-C-x3-H type (and similar)/CCCH-type zinc finger containing protein, putative	Tb927.5.1580	N/A	#N/A
Tb427-070032700	28.6034	1.90964e-42	17.862	1.33325e-101	both	both	both				Tb427_050036600	Tb427-050036600	Tb427_050036600.1	mTERF, putative	Tb927.5.3010	N/A	#N/A
Tb427-110022700	52.1495	3.67409e-13	17.4303	1.28634e-130	both	both	both				Tb427_050051600	Tb427-050051600	Tb427_050051600.1	DEAD/DEAH box helicase/Helicase conserved C-terminal domain/GUCT (NUC152) domain containing protein, putative	Tb927.5.4420	N/A	BSF
Tb427-100112400	43.1233	1.63863e-237	17.4191	0	both	both	both				Tb427_060009800	Tb427-060009800	Tb427_060009800.1	Calcineurin-like phosphoesterase, putative	Tb927.6.640	N/A	#N/A
Tb427-090085100	42.5361	3.08062e-66	17.1616	7.72166e-130	both	both	both				Tb427_060011600	Tb427-060011600	Tb427_060011600.1	Pumilio-family RNA binding repeat, putative	Tb927.6.820	N/A	both
Tb427-070020200	13.426	1.74082e-53	17.0992	4.52938e-125	both	both	both				Tb427_060015600	Tb427-060015600	Tb427_060015600.1	hypothetical protein, conserved	Tb927.6.1200	N/A	#N/A
Tb427-050021300	25.6511	1.3811e-53	16.713	5.94349e-155	both	both	both				Tb427_060023000	Tb427-060023000	Tb427_060023000.1	Eukaryotic initiation factor 4E, putative	Tb927.6.1870	N/A	#N/A
Tb427-110144500	9.25217	2.76273e-14	16.1116	3.2776e-51	both	both	both				Tb427_060026400	Tb427-060026400	Tb427_060026400.1	hypothetical protein, conserved	Tb927.6.2210	N/A	#N/A
Tb427-110032000	7.76404	1.01679e-21	15.8288	7.35391e-36	both	both	both				Tb427_060030400	Tb427-060030400	Tb427_060030400.1	RNA recognition motif. (a.k.a. RRM, RBD, or RNP domain), putative	Tb927.6.2550	N/A	#N/A
Tb427-100096700	10.2302	1.26283e-67	15.8103	9.9046e-133	both	both	both				Tb427_060048800	Tb427-060048800	Tb427_060048800.1	Eukaryotic translation initiation factor 3 subunit 7 (eIF-3), putative	Tb927.6.4370	N/A	#N/A
Tb427-030009300	11.0946	3.62248e-23	15.3588	1.34178e-79	both	both	both				Tb427_060049500	Tb427-060049500	Tb427_060049500.1	hypothetical protein, conserved	Tb927.6.4440	N/A	#N/A
Tb427-090088700	17.9054	1.38887e-37	15.301	1.7402e-60	both	both	both				Tb427_060052900	Tb427-060052900	Tb427_060052900.1	Temperature dependent protein affecting M2 dsRNA replication, putative	Tb927.6.4770	N/A	#N/A
Tb427-050050900	3.1531	4.4468e-09	15.0513	6.78421e-70	both	both	both				Tb427_060055100	Tb427-060055100	Tb427_060055100.1	hypothetical protein, conserved	Tb927.6.5010	N/A	#N/A
Tb427-040044500	17.0321	2.43742e-20	15.0462	1.01061e-39	both	both	both				Tb427_070012200	Tb427-070012200	Tb427_070012200.1	RNA recognition motif. (a.k.a. RRM, RBD, or RNP domain), putative	Tb927.7.880	N/A	#N/A
Tb427-110061500	15.3462	2.37307e-44	14.6804	5.21488e-56	both	both	both				Tb427_070014200	Tb427-070014200	Tb427_070014200.1	Ribosomal protein S9/S16, putative	Tb927.7.1050	N/A	#N/A
Tb427-060037300	12.3795	7.76654e-34	14.6597	1.84016e-146	both	both	both				Tb427_070014300	Tb427-070014300	Tb427_070014300.1	Ribosomal protein S9/S16, putative	Tb927.7.1050	N/A	#N/A
Tb427-000736100	9.59594	9.33886e-08	14.5196	7.39982e-14	both	both	both				Tb427_070014800	Tb427-070014800	Tb427_070014800.1	hypothetical protein, conserved	Tb927.7.1100	N/A	#N/A
Tb427-090039700	5.24679	2.38627e-14	14.2931	1.27152e-27	both	both	both				Tb427_070021600	Tb427-070021600	Tb427_070021600.1	Ribosomal L30 N-terminal domain/Ribosomal protein L30p/L7e, putative	Tb927.7.1730	N/A	#N/A
Tb427-110022600	35.7428	2.84216e-49	14.2835	1.21434e-166	both	both	both				Tb427_070021700	Tb427-070021700	Tb427_070021700.1	Ribosomal L30 N-terminal domain/Ribosomal protein L30p/L7e, putative	Tb927.7.1730	N/A	#N/A
Tb427-110166400	7.98794	3.17582e-10	13.5078	3.71288e-47	both	both	both				Tb427_070026300	Tb427-070026300	Tb427_070026300.1	hypothetical protein, conserved	Tb927.7.2170	N/A	BSF
Tb427-030020200	14.5212	1.02046e-96	13.3208	1.75408e-219	both	both	both				Tb427_070027000	Tb427-070027000	Tb427_070027000.1	hypothetical protein, conserved	Tb927.7.2240	N/A	#N/A
Tb427-100096500	15.8076	1.92818e-32	12.7873	4.02609e-59	both	both	both				Tb427_070038600	Tb427-070038600	Tb427_070038600.1	hypothetical protein, conserved	Tb927.7.3330	N/A	both
Tb427-030055500	6.389	1.33034e-20	12.402	7.49676e-52	both	both	both				Tb427_070042700	Tb427-070042700	Tb427_070042700.1	RNA recognition motif. (a.k.a. RRM, RBD, or RNP domain), putative	Tb927.7.3730	N/A	#N/A
Tb427-100129200	6.61059	1.45488e-16	12.2615	2.38536e-35	both	both	both				Tb427_070043500	Tb427-070043500	Tb427_070043500.1	'Cold-shock' DNA-binding domain containing protein, putative	Tb927.7.3810	N/A	#N/A
Tb427-110055200	9.68085	6.08392e-27	12.1785	1.55397e-109	both	both	both				Tb427_070045200	Tb427-070045200	Tb427_070045200.1	hypothetical protein, conserved	Tb927.7.3980	N/A	#N/A
Tb427-110102600	5.06019	2.77407e-07	12.1604	5.62323e-28	both	both	both				Tb427_070054600	Tb427-070054600	Tb427_070054600.1	XRN 5'-3' exonuclease N-terminus/Xrn1 helical domain/Exoribonuclease Xrn1 D1 domain/Xrn1 SH3-like domain containing protein, putative	Tb927.7.4900	N/A	#N/A
Tb427-110031900	16.4101	3.01442e-28	11.9211	7.3745e-104	both	both	both				Tb427_070082200	Tb427-070082200	Tb427_070082200.1	hypothetical protein, conserved	Tb927.7.7460	N/A	#N/A
Tb427-110141400	8.49869	7.44298e-12	11.8578	1.81994e-55	both	both	both				Tb427_080009200	Tb427-080009200	Tb427_080009200.1	hypothetical protein, conserved	Tb927.8.900	N/A	#N/A
Tb427-090029200	9.48501	6.79601e-50	11.8366	1.34771e-131	both	both	both				Tb427_080010100	Tb427-080010100	Tb427_080010100.1	RNA recognition motif. (a.k.a. RRM, RBD, or RNP domain), putative	Tb927.8.990	N/A	#N/A
Tb427-110047000	19.5923	7.64252e-43	11.7402	2.27686e-70	both	both	both				Tb427_080013500	Tb427-080013500	Tb427_080013500.1	Ribosomal protein L7Ae/L30e/S12e/Gadd45 family, putative	Tb927.8.1340	N/A	#N/A
Tb427-030018300	8.15985	1.26656e-30	11.6863	5.5352e-92	both	both	both				Tb427_080017300	Tb427-080017300	Tb427_080017300.1	hypothetical protein, conserved	Tb927.8.1500	N/A	#N/A
Tb427-070010900	7.04193	3.82648e-20	10.8537	5.32633e-41	both	both	both				Tb427_080017400	Tb427-080017400	Tb427_080017400.1	DEAD/DEAH box helicase/Helicase conserved C-terminal domain containing protein, putative	Tb927.8.1510	N/A	BSF
Tb427-080047200	13.893	1.74469e-25	10.4779	2.20207e-144	both	both	both				Tb427_080031200	Tb427-080031200	Tb427_080031200.1	RNA recognition motif. (a.k.a. RRM, RBD, or RNP domain), putative	Tb927.8.2780	N/A	#N/A
Tb427-090046100	11.0467	2.60069e-17	10.4477	9.22926e-26	both	both	both				Tb427_080043400	Tb427-080043400	Tb427_080043400.1	PSP1 C-terminal conserved region containing protein, putative	Tb927.8.3850	N/A	both
Tb427-110017900	2.877	4.51487e-05	10.2453	1.80891e-73	both	both	both				Tb427_080049900	Tb427-080049900	Tb427_080049900.1	MIF4G domain containing protein, putative	Tb927.8.4500	N/A	#N/A
Tb427-040026500	9.56087	2.69546e-33	10.1055	2.94014e-105	both	both	both				Tb427_080050400	Tb427-080050400	Tb427_080050400.1	Ataxin 2 SM domain/LsmAD domain containing protein, putative	Tb927.8.4540	N/A	BSF
Tb427-070062300	8.03518	1.7896e-13	10.0128	9.00783e-53	both	both	both				Tb427_090024400	Tb427-090024400	Tb427_090024400.1	hypothetical protein, conserved	Tb927.9.4080	N/A	#N/A
Tb427-080077000	9.42073	6.8445e-24	9.80617	2.12182e-40	both	both	both				Tb427_090027000	Tb427-090027000	Tb427_090027000.1	DEAD/DEAH box helicase/Helicase conserved C-terminal domain containing protein, putative	Tb927.9.4680	N/A	#N/A
Tb427-110138200	20.6973	1.08939e-56	9.50751	5.54782e-192	both	both	both				Tb427_090029800	Tb427-090029800	Tb427_090029800.1	snoRNA binding domain, fibrillarin, putative	Tb927.9.5320	N/A	BSF
Tb427-100022200	13.4793	9.79433e-21	9.40698	3.18709e-49	both	both	both				Tb427_090032800	Tb427-090032800	Tb427_090032800.1	KH domain/Ribosomal protein S3, C-terminal domain containing protein, putative	Tb927.9.6070	N/A	#N/A
Tb427-050043300	3.41355	7.36092e-05	9.4057	2.66686e-52	both	both	both				Tb427_090049100	Tb427-090049100	Tb427_090049100.1	RNA recognition motif. (a.k.a. RRM, RBD, or RNP domain), putative	Tb927.9.8740	N/A	#N/A
Tb427-050043800	15.7488	1.13046e-08	9.30865	1.53322e-101	both	both	both				Tb427_090053800	Tb427-090053800	Tb427_090053800.1	CCCH-type zinc finger containing protein, putative	Tb927.9.9520	N/A	#N/A
Tb427-050034300	12.8905	3.20441e-61	9.26296	8.96819e-109	both	both	both				Tb427_090053900	Tb427-090053900	Tb427_090053900.1	hypothetical protein, conserved	Tb927.9.9550	N/A	#N/A
Tb427-070068800	6.87141	4.51285e-48	9.05217	1.15722e-158	both	both	both				Tb427_090056700	Tb427-090056700	Tb427_090056700.1	DnaJ domain containing protein, putative	Tb927.9.10010	N/A	#N/A
Tb427-110028000	3.79011	1.79789e-05	8.97025	4.6992e-26	both	both	both				Tb427_090058900	Tb427-090058900	Tb427_090058900.1	hypothetical protein, conserved	Tb927.9.10400	N/A	both
Tb427-000198100:pseudogene	11.0519	3.84189e-22	8.86408	2.07281e-63	both	both	both				Tb427_090063300	Tb427-090063300	Tb427_090063300.1	hypothetical protein, conserved	Tb927.9.11050	N/A	#N/A
Tb427-040054500	9.63303	1.89922e-54	8.79367	2.75906e-149	both	both	both				Tb427_090069500	Tb427-090069500	Tb427_090069500.1	hypothetical protein, conserved	Tb927.9.12070	N/A	#N/A
Tb427-110167000	3.96321	3.00947e-05	8.76637	2.7365e-47	both	both	both				Tb427_090071700	Tb427-090071700	Tb427_090071700.1	hypothetical protein, conserved	Tb927.9.12360	N/A	#N/A
Tb427-080043400	9.45527	3.71378e-24	8.73429	1.89581e-131	both	both	both				Tb427_090072800	Tb427-090072800	Tb427_090072800.1	DEAD/DEAH box helicase/Helicase conserved C-terminal domain containing protein, putative	Tb927.9.12510	N/A	BSF
Tb427-080011700	9.60372	1.51964e-52	8.69876	1.65823e-137	both	both	both				Tb427_090075600	Tb427-090075600	Tb427_090075600.1	PPR repeat/Pentatricopeptide repeat domain containing protein, putative	Tb927.9.12770	N/A	#N/A
Tb427-110056400	9.19113	3.22282e-16	8.64817	9.22926e-26	both	both	both				Tb427_090083000	Tb427-090083000	Tb427_090083000.1	RNA recognition motif. (a.k.a. RRM, RBD, or RNP domain), putative	Tb927.9.13990	N/A	BSF
Tb427-090078400	4.23194	2.6731e-10	8.64238	3.65702e-40	both	both	both				Tb427_090089500	Tb427-090089500	Tb427_090089500.1	Ribosomal protein S6e, putative	Tb927.9.15360	N/A	#N/A
Tb427-050041600	7.81289	1.9086e-33	8.5712	2.50788e-205	both	both	both				Tb427_100005300	Tb427-100005300	Tb427_100005300.1	Ribosomal protein S6e, putative	Tb927.10.190	N/A	#N/A
Tb427-070068200	5.08972	3.15902e-10	8.56572	2.73347e-62	both	both	both				Tb427_100006500	Tb427-100006500	Tb427_100006500.1	Pumilio-family RNA binding repeat, putative	Tb927.10.310	N/A	#N/A
Tb427-110135700	5.76076	3.34104e-11	8.5378	1.09216e-31	both	both	both				Tb427_100008600	Tb427-100008600	Tb427_100008600.1	DEAD/DEAH box helicase/Type III restriction enzyme, res subunit/Helicase conserved C-terminal domain containing protein, putative	Tb927.10.540	N/A	#N/A
Tb427-110058400	7.5607	1.384e-27	8.46953	1.68966e-49	both	both	both				Tb427_100008800	Tb427-100008800	Tb427_100008800.1	Ribosomal_S17 N-terminal/Ribosomal protein S17, putative	Tb927.10.560	N/A	#N/A
Tb427-040025200	7.21342	1.9236e-15	8.34164	2.33903e-35	both	both	both				Tb427_100018400	Tb427-100018400	Tb427_100018400.1	hypothetical protein, conserved	Tb927.10.1540	N/A	#N/A
Tb427-110169400	7.9674	0.00499833	8.29543	1.01101e-16	both	both	both				Tb427_100025100	Tb427-100025100	Tb427_100025100.1	Elongation factor Tu GTP binding domain/Elongation factor Tu domain 2/Elongation factor Tu C-terminal domain containing protein, putative	Tb927.10.2110	N/A	#N/A
Tb427-100011900	7.58312	4.58273e-79	8.16891	1.79271e-215	both	both	both				Tb427_100025200	Tb427-100025200	Tb427_100025200.1	Elongation factor Tu GTP binding domain/Elongation factor Tu domain 2/Elongation factor Tu C-terminal domain containing protein, putative	Tb927.10.2110	N/A	#N/A
Tb427-110007300	9.3468	3.54007e-22	8.14692	1.44665e-47	both	both	both				Tb427_100025300	Tb427-100025300	Tb427_100025300.1	Elongation factor Tu GTP binding domain/Elongation factor Tu domain 2/Elongation factor Tu C-terminal domain containing protein, putative	Tb927.10.2110	N/A	#N/A
Tb427-100165000	9.69733	2.51444e-11	8.11856	2.34364e-35	both	both	both				Tb427_100026600	Tb427-100026600	Tb427_100026600.1	Nuclear transport factor 2 (NTF2) domain containing protein, putative	Tb927.10.2240	N/A	#N/A
Tb427-030028500	7.48796	3.7763e-26	8.02009	1.24627e-39	both	both	both				Tb427_100027900	Tb427-100027900	Tb427_100027900.1	La domain/RNA recognition motif. (a.k.a. RRM, RBD, or RNP domain), putative	Tb927.10.2370	N/A	BSF
Tb427-100036200	5.62536	0.000189359	7.80502	8.7909e-35	both	both	both				Tb427_100037000	Tb427-100037000	Tb427_100037000.1	Zinc knuckle, putative	Tb927.10.3200	N/A	BSF
Tb427-100069800	4.56193	3.39747e-14	7.76318	2.27774e-43	both	both	both				Tb427_100039600	Tb427-100039600	Tb427_100039600.1	RNA recognition motif. (a.k.a. RRM, RBD, or RNP domain), putative	Tb927.10.3500	N/A	#N/A
Tb427-080028700	17.5322	1.82643e-105	7.74671	0	both	both	both				Tb427_100042500	Tb427-100042500	Tb427_100042500.1	Down-regulated in metastasis, putative	Tb927.10.3790	N/A	#N/A
Tb427-100147900	14.8558	4.36464e-17	7.5216	8.20165e-32	both	both	both				Tb427_100044000	Tb427-100044000	Tb427_100044000.1	Ribosomal S3Ae family, putative	Tb927.10.3940	N/A	#N/A
Tb427-100005900	2.96954	0.000154444	7.49819	3.31253e-32	both	both	both				Tb427_100044400	Tb427-100044400	Tb427_100044400.1	DEAD/DEAH box helicase/Helicase conserved C-terminal domain containing protein, putative	Tb927.10.3990	N/A	#N/A
Tb427-090028000	4.80424	0.000436663	7.49461	2.43782e-21	both	both	both				Tb427_100048300	Tb427-100048300	Tb427_100048300.1	Pumilio-family RNA binding repeat, putative	Tb927.10.4430	N/A	#N/A
Tb427-070051300	5.00336	5.42884e-17	7.33039	6.29264e-45	both	both	both				Tb427_100049700	Tb427-100049700	Tb427_100049700.1	Elongation factor Tu GTP binding domain/Elongation factor Tu domain 2/Elongation Factor G, domain II/Elongation factor G, domain IV/Elongation factor G C-terminus, putative	Tb927.10.4570	N/A	#N/A
Tb427-100128700	5.37513	3.36462e-15	7.23905	3.29853e-76	both	both	both				Tb427_100049800	Tb427-100049800	Tb427_100049800.1	Elongation factor Tu GTP binding domain/Elongation factor Tu domain 2/Elongation Factor G, domain II/Elongation factor G, domain IV/Elongation factor G C-terminus, putative	Tb927.10.4570	N/A	#N/A
Tb427-070049100	18.3984	1.02091e-35	7.16494	1.60713e-86	both	both	both				Tb427_100050500	Tb427-100050500	Tb427_100050500.1	RNA polymerase I-associated factor PAF67, putative	Tb927.10.4640	N/A	#N/A
Tb427-100131800	9.9349	6.96284e-17	7.02762	2.35335e-82	both	both	both				Tb427_100056600	Tb427-100056600	Tb427_100056600.1	hypothetical protein, conserved	Tb927.10.5250	N/A	#N/A
Tb427-050052300	10.0498	3.74533e-09	6.97833	1.92988e-20	both	both	both				Tb427_100057500	Tb427-100057500	Tb427_100057500.1	Ribosomal protein S13/S18, putative	Tb927.10.5340	N/A	#N/A
Tb427-040033700	3.69399	1.60256e-08	6.89565	1.36389e-21	both	both	both				Tb427_100057800	Tb427-100057800	Tb427_100057800.1	Plectin/S10 domain containing protein, putative	Tb927.10.5370	N/A	BSF
Tb427-070025700	12.2898	5.87325e-39	6.87645	5.68537e-78	both	both	both				Tb427_100064700	Tb427-100064700	Tb427_100064700.1	Clathrin, heavy-chain linker/Clathrin-H-link/Region in Clathrin and VPS, putative	Tb927.10.6050	N/A	#N/A
Tb427-030055100	3.31645	2.02825e-05	6.73239	9.67013e-28	both	both	both				Tb427_100064800	Tb427-100064800	Tb427_100064800.1	Zinc knuckle, putative	Tb927.10.6060	N/A	#N/A
Tb427-080055400	13.8359	4.77833e-61	6.67786	1.49977e-71	both	both	both				Tb427_100064900	Tb427-100064900	Tb427_100064900.1	Zinc knuckle, putative	Tb927.10.6070	N/A	#N/A
Tb427-010024800	5.31818	2.89569e-21	6.60297	1.84119e-46	both	both	both				Tb427_100089600	Tb427-100089600	Tb427_100089600.1	Eukaryotic translation initiation factor 3 subunit 8 N-terminus, putative	Tb927.10.8290	N/A	#N/A
Tb427-080040400	15.4115	1.57802e-71	6.59458	1.15737e-151	both	both	both				Tb427_100096400	Tb427-100096400	Tb427_100096400.1	hypothetical protein, conserved	Tb927.10.8940	N/A	#N/A
Tb427-100012000	4.90267	1.84308e-29	6.53688	3.18477e-124	both	both	both				Tb427_100100500	Tb427-100100500	Tb427_100100500.1	hypothetical protein, conserved	Tb927.10.9330	N/A	#N/A
Tb427-040054600	3.58507	1.44108e-14	6.50604	1.33982e-112	both	both	both				Tb427_100105900	Tb427-100105900	Tb427_100105900.1	PSP1 C-terminal conserved region containing protein, putative	Tb927.10.9910	N/A	#N/A
Tb427-090030900	10.9527	7.51212e-44	6.45777	1.8054e-108	both	both	both				Tb427_100115000	Tb427-100115000	Tb427_100115000.1	RNA recognition motif. (a.k.a. RRM, RBD, or RNP domain), putative	Tb927.10.10830	N/A	#N/A
Tb427-100076000	5.80573	5.25634e-07	6.38282	1.53602e-21	both	both	both				Tb427_100115300	Tb427-100115300	Tb427_100115300.1	PAZ domain/Piwi domain containing protein, putative	Tb927.10.10850	N/A	#N/A
Tb427-050035500	6.12879	7.65257e-10	6.35085	2.44983e-29	both	both	both				Tb427_100125100	Tb427-100125100	Tb427_100125100.1	Pumilio-family RNA binding repeat, putative	Tb927.10.11760	N/A	BSF
Tb427-110051800	6.67529	2.2009e-16	6.34872	9.92967e-55	both	both	both				Tb427_100134000	Tb427-100134000	Tb427_100134000.1	Pumilio-family RNA binding repeat, putative	Tb927.10.12660	N/A	#N/A
Tb427-090085200	3.42612	7.92772e-11	6.32812	2.69042e-38	both	both	both				Tb427_100143200	Tb427-100143200	Tb427_100143200.1	RNA recognition motif. (a.k.a. RRM, RBD, or RNP domain), putative	Tb927.10.13540	N/A	#N/A
Tb427-030038100	8.63926	1.7353e-08	6.30341	3.00749e-38	both	both	both				Tb427_100145300	Tb427-100145300	Tb427_100145300.1	RNA recognition motif. (a.k.a. RRM, RBD, or RNP domain), putative	Tb927.10.13720	N/A	#N/A
Tb427-100054800:pseudogene	4.19204	7.39806e-11	6.25344	7.2273e-54	both	both	both				Tb427_100149600	Tb427-100149600	Tb427_100149600.1	Pyruvate kinase, barrel domain/HpcH/HpaI aldolase/citrate lyase family/Pyruvate kinase, alpha/beta domain containing protein, putative	Tb927.10.14140	N/A	#N/A
Tb427-010030000	5.07712	5.92361e-32	6.24629	2.22288e-58	both	both	both				Tb427_100149800	Tb427-100149800	Tb427_100149800.1	hypothetical protein, conserved	Tb927.10.14150	N/A	BSF
Tb427-030053000	3.98212	1.03714e-08	6.24527	8.39005e-73	both	both	both				Tb427_100153800	Tb427-100153800	Tb427_100153800.1	DEAD/DEAH box helicase/Helicase conserved C-terminal domain containing protein, putative	Tb927.10.14550	N/A	#N/A
Tb427-110127900	3.10669	5.85979e-06	6.23586	2.79292e-32	both	both	both				Tb427_100155300	Tb427-100155300	Tb427_100155300.1	hypothetical protein, conserved	Tb927.10.14700	N/A	BSF
Tb427-100072200	3.02318	0.000715379	6.228	3.24227e-15	both	both	both				Tb427_100157500	Tb427-100157500	Tb427_100157500.1	hypothetical protein, conserved	Tb927.10.14930	N/A	#N/A
Tb427-060015800	8.24939	1.44673e-19	6.2022	2.82478e-58	both	both	both				Tb427_100157600	Tb427-100157600	Tb427_100157600.1	hypothetical protein, conserved	Tb927.10.14950	N/A	#N/A
Tb427-060038400	5.93301	7.95359e-09	6.19719	7.44444e-24	both	both	both				Tb427_100160400	Tb427-100160400	Tb427_100160400.1	hypothetical protein, conserved	Tb927.10.15170	N/A	#N/A
Tb427-110144100	5.27974	4.1251e-25	6.12232	1.27581e-87	both	both	both				Tb427_100161800	Tb427-100161800	Tb427_100161800.1	hypothetical protein, conserved	Tb927.10.15310	N/A	#N/A
Tb427-110166800	18.8764	2.18333e-163	6.07851	1.12687e-181	both	both	both				Tb427_110009300	Tb427-110009300	Tb427_110009300.1	RNA recognition motif. (a.k.a. RRM, RBD, or RNP domain), putative	Tb927.11.510	N/A	#N/A
Tb427-010033100	16.285	0.00552269	6.05679	0.000761196	both	both	both				Tb427_110009500	Tb427-110009500	Tb427_110009500.1	RNA recognition motif. (a.k.a. RRM, RBD, or RNP domain), putative	Tb927.11.530	N/A	#N/A
Tb427-100085800	6.4355	7.52011e-11	6.01872	2.49472e-29	both	both	both				Tb427_110009700	Tb427-110009700	Tb427_110009700.1	Scd6-like Sm domain containing protein, putative	Tb927.11.550	N/A	#N/A
Tb427-020017400	4.1157	1.16262e-06	5.93485	3.2312e-26	both	both	both				Tb427_110021800	Tb427-110021800	Tb427_110021800.1	Mitochondrial RNA binding protein MRP, putative	Tb927.11.1710	N/A	#N/A
Tb427-110060800	7.64453	3.28912e-09	5.91851	3.47105e-15	both	both	both				Tb427_110024600	Tb427-110024600	Tb427_110024600.1	Zinc finger C-x8-C-x5-C-x3-H type (and similar)/CCCH-type zinc finger/Helicase conserved C-terminal domain containing protein, putative	Tb927.11.1980	N/A	BSF
Tb427-090021500	5.26571	5.51225e-11	5.90036	9.13946e-40	both	both	both				Tb427_110027400	Tb427-110027400	Tb427_110027400.1	hypothetical protein, conserved	Tb927.11.2250	N/A	#N/A
Tb427-050026800	4.66752	3.54312e-06	5.85426	4.52237e-15	both	both	both				Tb427_110027900	Tb427-110027900	Tb427_110027900.1	eRF1 domain 1/Bacterial archaeo-eukaryotic release factor family 10/eRF1 domain 2/Actinobacteria/chloroflexi VLRF1 release factor/eRF1 domain 3, putative	Tb927.11.2300	N/A	#N/A
Tb427-100078600	7.2253	1.27565e-14	5.84787	1.18747e-41	both	both	both				Tb427_110040000	Tb427-110040000	Tb427_110040000.1	hypothetical protein, conserved	Tb927.11.3490	N/A	#N/A
Tb427-110165900	7.00678	4.41101e-74	5.80265	9.82051e-264	both	both	both				Tb427_110047000	Tb427-110047000	Tb427_110047000.1	PSP1 C-terminal conserved region containing protein, putative	Tb927.11.4180	N/A	both
Tb427-010032000	5.2447	1.14015e-05	5.80134	9.86817e-22	both	both	both				Tb427_110049700	Tb427-110049700	Tb427_110049700.1	Alba, putative	Tb927.11.4460	N/A	#N/A
Tb427-080040200	5.80691	6.05435e-16	5.70132	1.40207e-33	both	both	both				Tb427_110056600	Tb427-110056600	Tb427_110056600.1	hypothetical protein, conserved	Tb927.11.5150	N/A	#N/A
Tb427-030028200	7.499	2.94808e-22	5.64362	1.00985e-91	both	both	both				Tb427_110063600	Tb427-110063600	Tb427_110063600.1	hypothetical protein, conserved	Tb927.11.5850	N/A	#N/A
Tb427-080035000	5.17073	1.77679e-28	5.59873	2.14417e-56	both	both	both				Tb427_110066500	Tb427-110066500	Tb427_110066500.1	Elongation factor Tu GTP binding domain/Elongation factor Tu C-terminal domain containing protein, putative	Tb927.11.6160	N/A	#N/A
Tb427-110176500	7.15691	4.80792e-36	5.5949	2.9863e-73	both	both	both				Tb427_110066900	Tb427-110066900	Tb427_110066900.1	Ribosomal L28e protein family, putative	Tb927.11.6200	N/A	#N/A
Tb427-110094400	3.60123	5.18095e-09	5.54887	2.97134e-34	both	both	both				Tb427_110067900	Tb427-110067900	Tb427_110067900.1	Ribosomal protein S7p/S5e, putative	Tb927.11.6300	N/A	#N/A
Tb427-060039200	2.53951	0.000911418	5.54299	4.05291e-21	both	both	both				Tb427_110068000	Tb427-110068000	Tb427_110068000.1	Ribosomal protein S7p/S5e, putative	Tb927.11.6300	N/A	#N/A
Tb427-070010600	5.6848	1.75496e-07	5.53045	8.30292e-40	both	both	both				Tb427_110069300	Tb427-110069300	Tb427_110069300.1	hypothetical protein, conserved	Tb927.11.6430	N/A	#N/A
Tb427-100120400	7.37005	2.95048e-72	5.50968	1.58767e-180	both	both	both				Tb427_110069400	Tb427-110069400	Tb427_110069400.1	hypothetical protein, conserved	Tb927.11.6440	N/A	#N/A
Tb427-090028700	5.29926	2.13781e-12	5.49479	7.66613e-29	both	both	both				Tb427_110072500	Tb427-110072500	Tb427_110072500.1	hypothetical protein, conserved	Tb927.11.6740	N/A	#N/A
Tb427-080043900	9.93958	1.20567e-08	5.47949	3.3732e-14	both	both	both				Tb427_110076300	Tb427-110076300	Tb427_110076300.1	PSP1 C-terminal conserved region containing protein, putative	Tb927.11.7140	N/A	#N/A
Tb427-070009500	25.6193	4.70206e-69	5.47503	3.808e-158	both	both	both				Tb427_110089700	Tb427-110089700	Tb427_110089700.1	Ribosomal protein S26e, putative	Tb927.11.8200	N/A	#N/A
Tb427-110037700	5.58254	4.45426e-24	5.47317	1.82265e-57	both	both	both				Tb427_110123300	Tb427-110123300	Tb427_110123300.1	hypothetical protein, conserved	Tb927.11.10810	N/A	BSF
Tb427-100136400	6.96242	2.67912e-33	5.45865	7.6579e-78	both	both	both				Tb427_110124300	Tb427-110124300	Tb427_110124300.1	Ribosomal protein S2, putative	Tb927.11.10910	N/A	#N/A
Tb427-110069200	14.844	4.76345e-44	5.42896	5.33334e-102	both	both	both				Tb427_110129900	Tb427-110129900	Tb427_110129900.1	WD domain, G-beta repeat, putative	Tb927.11.11370	N/A	#N/A
Tb427-070065100	5.40378	1.76726e-05	5.36925	2.30085e-32	both	both	both				Tb427_110134500	Tb427-110134500	Tb427_110134500.1	R3H domain containing protein, putative	Tb927.11.11790	N/A	#N/A
Tb427-080019600	8.77333	2.25011e-73	5.30972	1.52803e-174	both	both	both				Tb427_110145600	Tb427-110145600	Tb427_110145600.1	hypothetical protein, conserved	Tb927.11.12880	N/A	#N/A
Tb427-100105200	4.34136	5.42811e-22	5.2852	2.75856e-116	both	both	both				Tb427_110145700	Tb427-110145700	Tb427_110145700.1	hypothetical protein, conserved	Tb927.11.12880	N/A	BSF
Tb427-060051900	10.9405	1.85254e-113	5.28478	2.24636e-146	both	both	both				Tb427_110150600	Tb427-110150600	Tb427_110150600.1	Mitochondrial RNA binding protein MRP, putative	Tb927.11.13280	N/A	#N/A
Tb427-030009700	7.8053	1.68544e-25	5.2207	9.18878e-56	both	both	both				Tb427_110158000	Tb427-110158000	Tb427_110158000.1	RNA recognition motif. (a.k.a. RRM, RBD, or RNP domain), putative	Tb927.11.14020	N/A	#N/A
Tb427-080066400	6.51392	3.57955e-24	5.1915	8.84785e-69	both	both	both				Tb427_110158700	Tb427-110158700	Tb427_110158700.1	RNA recognition motif. (a.k.a. RRM, RBD, or RNP domain), putative	Tb927.11.14090	N/A	BSF
Tb427-060020000	4.22758	9.72461e-06	5.18771	2.87783e-22	both	both	both				Tb427_110158800	Tb427-110158800	Tb427_110158800.1	RNA recognition motif. (a.k.a. RRM, RBD, or RNP domain), putative	Tb927.11.14100	N/A	#N/A
Tb427-110147900	7.40607	2.07887e-17	5.10704	3.17362e-52	both	both	both				Tb427_110159100	Tb427-110159100	Tb427_110159100.1	Ribosomal proteins 50S-L18Ae/60S-L20/60S-L18A, putative	Tb927.11.14130	N/A	#N/A
Tb427-110082700	5.47416	2.43653e-35	5.10165	4.10644e-133	both	both	both				Tb427_110159800	Tb427-110159800	Tb427_110159800.1	Staphylococcal nuclease homologue/Tudor domain containing protein, putative	Tb927.11.14190	N/A	#N/A
Tb427-090066600	4.02259	1.75415e-05	5.10069	3.2058e-18	both	both	both				Tb427_110160100	Tb427-110160100	Tb427_110160100.1	hypothetical protein, conserved	Tb927.11.14220	N/A	#N/A
Tb427-100083900	5.82769	6.01919e-27	5.1	2.83644e-63	both	both	both				Tb427_110165900	Tb427-110165900	Tb427_110165900.1	PSP1 C-terminal conserved region containing protein, putative	Tb927.11.14750	N/A	both
Tb427-110015000	6.63422	1.82496e-34	5.07555	1.21193e-166	both	both	both				Tb427_110167900	Tb427-110167900	Tb427_110167900.1	WW domain containing protein, putative	Tb927.11.14950	N/A	#N/A
Tb427-060033600	4.51565	2.71996e-29	5.06876	1.51512e-155	both	both	both				Tb427_110185100	Tb427-110185100	Tb427_110185100.1	Zinc finger C-x8-C-x5-C-x3-H type (and similar), putative	Tb927.11.16550	N/A	BSF
Tb427-100054000	7.2246	1.84865e-14	5.04166	2.82494e-54	both	both	both
Tb427-070054100	5.34625	7.07493e-13	5.02879	1.92448e-57	both	both	both
Tb427-060023400	4.97895	2.00893e-11	5.02093	6.76584e-38	both	both	both
Tb427-100108200	5.1584	1.82483e-07	4.94434	2.02419e-65	both	both	both
Tb427-070079600	2.3169	3.03336e-05	4.93243	1.17571e-22	both	both	both
Tb427-090055600	6.56263	6.01555e-29	4.881	1.72701e-164	both	both	both
Tb427-100016400	3.3387	0.000455352	4.87655	4.62558e-22	both	both	both
Tb427-090048300	5.19534	8.47626e-14	4.8584	1.24029e-40	both	both	both
Tb427-110166700	2.40527	3.56005e-06	4.84734	3.95337e-25	both	both	both
Tb427-090067900	4.92421	7.62937e-44	4.82903	9.70929e-44	both	both	both
Tb427-060036900	16.6916	4.07311e-184	4.81182	9.04636e-290	both	both	both
Tb427-110076200	5.63034	4.98299e-05	4.80143	8.82478e-14	both	both	both
Tb427-100094900	4.18272	1.46236e-08	4.7511	1.1832e-23	both	both	both
Tb427-060012400	5.61915	1.63897e-09	4.70449	6.21029e-37	both	both	both
Tb427-100135800	19.0677	1.33865e-22	4.66521	1.93525e-38	both	both	both
Tb427-070072300	4.80396	3.09174e-46	4.61686	7.62106e-220	both	both	both
Tb427-100136700	8.43915	2.06971e-26	4.61157	5.34473e-61	both	both	both
Tb427-100168500	5.36686	8.98257e-10	4.60597	3.48536e-21	both	both	both
Tb427-110065200	4.31829	7.96197e-06	4.60421	8.74722e-17	both	both	both
Tb427-110023500	26.8003	7.3744e-11	4.59513	3.29269e-14	both	both	both
Tb427-070063100	3.60123	3.96584e-06	4.58586	2.84632e-15	both	both	both
Tb427-110016700	3.15507	9.95045e-10	4.58255	4.03481e-44	both	both	both
Tb427-100067700	7.36237	6.11329e-41	4.56117	3.03651e-130	both	both	both
Tb427-100036400	6.47557	1.213e-13	4.55508	4.44877e-70	both	both	both
Tb427-030057200	7.03526	1.44327e-89	4.5069	3.17768e-145	both	both	both
Tb427-070080400	4.50785	1.49436e-42	4.48843	1.23145e-33	both	both	both
Tb427-110161600	3.79237	1.23806e-20	4.48732	6.84073e-65	both	both	both
Tb427-100031200	3.47777	0.000157374	4.47351	2.52692e-23	both	both	both
Tb427-050034400	4.97913	3.81559e-17	4.47174	5.39866e-55	both	both	both
Tb427-100085500	3.58264	3.50999e-30	4.466	4.2941e-133	both	both	both
Tb427-100125800	2.51693	0.000882999	4.42652	2.52432e-17	both	both	both
Tb427-020032100	3.53327	1.02358e-47	4.4201	5.56336e-179	both	both	both
Tb427-100018300	4.40579	8.62651e-09	4.41834	4.86107e-27	both	both	both
Tb427-080054300	6.1509	7.668e-05	4.37575	7.25415e-28	both	both	both
Tb427-090049200	4.90808	4.76183e-15	4.36228	9.73275e-60	both	both	both
Tb427-010020000	3.58518	3.74648e-25	4.36049	4.84595e-99	both	both	both
Tb427-080007300	3.78309	3.3418e-81	4.33901	6.99648e-134	both	both	both
Tb427-070058700	2.17074	3.95126e-06	4.30926	1.27349e-42	both	both	both
Tb427-100104100	9.31791	6.86708e-44	4.30121	5.82429e-38	both	both	both
Tb427-070073300	7.02097	1.29295e-05	4.30061	1.48069e-33	both	both	both
Tb427-010006000	3.2849	0.00113371	4.29751	8.11133e-10	both	both	both
Tb427-100063900:pseudogene	2.33515	9.57959e-05	4.26771	7.15965e-13	both	both	both
Tb427-050013100	4.54585	1.12758e-07	4.25345	2.34354e-42	both	both	both
Tb427-040044000	18.6009	8.37472e-39	4.24119	8.11291e-14	both	both	both
Tb427-100038900	15.5686	2.80823e-23	4.23887	9.34667e-26	both	both	both
Tb427-070080800	4.12646	1.51864e-07	4.2238	4.71041e-32	both	both	both
Tb427-010005900	3.76108	0.000215458	4.22296	3.83653e-18	both	both	both
Tb427-100050100:pseudogene	2.46846	0.00229898	4.22181	7.79851e-46	both	both	both
Tb427-110070500	8.24877	1.30857e-102	4.21141	7.09436e-174	both	both	both
Tb427-010009400	6.14156	2.36244e-08	4.19906	4.53289e-23	both	both	both
Tb427-080007400	3.8694	6.27209e-144	4.19794	0	both	both	both
Tb427-110055400	3.43996	4.50536e-20	4.19468	3.75187e-32	both	both	both
Tb427-070018400	6.13658	1.05679e-20	4.19286	8.26975e-61	both	both	both
Tb427-040009800	4.19958	3.18993e-14	4.19221	1.42784e-28	both	both	both
Tb427-100056700	8.8245	1.02354e-15	4.17413	1.39524e-21	both	both	both
Tb427-020018000	2.39753	9.40342e-07	4.12653	1.36319e-20	both	both	both
Tb427-070053700	2.98308	0.00098106	4.11433	1.46994e-20	both	both	both
Tb427-110064800	4.59221	8.04829e-06	4.11295	6.78614e-19	both	both	both
Tb427-110059200	3.48081	2.08448e-06	4.10539	1.06554e-13	both	both	both
Tb427-100026100	5.27089	9.85516e-99	4.10313	1.16546e-99	both	both	both
Tb427-010020500	3.92353	6.85112e-44	4.09199	1.43038e-88	both	both	both
Tb427-050036200	5.53138	7.52178e-10	4.08835	2.91497e-29	both	both	both
Tb427-110157600	6.52289	7.77315e-13	4.08624	1.40755e-18	both	both	both
Tb427-080059400	2.63767	1.26339e-07	4.05644	2.07193e-36	both	both	both
Tb427-110124500	4.33972	1.72959e-11	4.04811	1.25299e-54	both	both	both
Tb427-090085500	4.58718	6.0594e-10	4.04258	1.21479e-40	both	both	both
Tb427-080077100	12.5149	1.95249e-26	4.02597	1.77664e-45	both	both	both
Tb427-100076500	2.78235	8.73408e-05	4.0222	6.70666e-37	both	both	both
Tb427-110070600	8.87162	5.26889e-32	4.02011	1.24627e-39	both	both	both
Tb427-100064300	4.2475	7.6364e-19	4.01452	1.25299e-54	both	both	both
Tb427-090068200	2.88798	1.53096e-11	3.98952	2.84988e-57	both	both	both
Tb427-110121500	3.69068	1.94578e-45	3.97601	7.09057e-72	both	both	both
Tb427-090009100	3.62185	1.69003e-05	3.96582	1.51273e-33	both	both	both
Tb427-050033700	3.74088	4.87655e-08	3.94667	2.49016e-29	both	both	both
Tb427-060044700	2.82843	6.7432e-05	3.94184	1.35727e-12	both	both	both
Tb427-070027500	12.7017	3.94548e-40	3.93461	6.90143e-42	both	both	both
Tb427-110095800	2.18647	0.00252889	3.90162	3.99837e-16	both	both	both
Tb427-080076100	4.26241	1.16958e-36	3.90065	6.69683e-59	both	both	both
Tb427-080069400	6.45053	3.82841e-18	3.89187	3.59406e-30	both	both	both
Tb427-110013600	5.46666	2.80069e-55	3.88332	9.95785e-87	both	both	both
Tb427-060015700	4.55306	2.50892e-18	3.85499	1.03892e-58	both	both	both
Tb427-050041400	4.43669	5.17344e-07	3.81021	1.80824e-11	both	both	both
Tb427-040015500	3.25681	0.000276295	3.80317	3.656e-21	both	both	both
Tb427-090089900	3.29297	1.03358e-09	3.79889	3.34615e-47	both	both	both
Tb427-060034100	4.96028	1.25063e-17	3.79752	5.013e-56	both	both	both
Tb427-000347900	4.80146	0.00641611	3.78806	3.3592e-07	both	both	both
Tb427-070059800	10.5772	9.34979e-32	3.78578	2.96073e-12	both	both	both
Tb427-060035500	3.932	2.74056e-08	3.77576	6.81804e-46	both	both	both
Tb427-110045000	3.13836	5.91249e-06	3.77043	4.73702e-19	both	both	both
Tb427-080047300	2.88159	1.3984e-05	3.7536	1.98685e-21	both	both	both
Tb427-110085600	14.4853	8.39801e-72	3.73889	4.60482e-102	both	both	both
Tb427-110089800	5.27877	8.1214e-32	3.73667	3.82442e-54	both	both	both
Tb427-030046000	8.57799	2.55573e-104	3.72813	4.8596e-91	both	both	both
Tb427-030042000	8.79217	4.85164e-22	3.70677	2.00223e-16	both	both	both
Tb427-110166900	6.91856	1.67681e-43	3.6833	4.38116e-71	both	both	both
Tb427-060046000	5.20268	1.61959e-20	3.67801	1.74213e-71	both	both	both
Tb427-070080900	4.31677	2.00044e-10	3.67744	2.63121e-25	both	both	both
Tb427-050052600	5.10663	1.74766e-41	3.66352	6.96988e-138	both	both	both
Tb427-090089700	5.21852	6.81398e-19	3.65866	5.44934e-45	both	both	both
Tb427-080081200	5.42078	4.97552e-06	3.65822	6.51919e-36	both	both	both
Tb427-110167700	3.10822	1.01445e-05	3.63495	4.01189e-82	both	both	both
Tb427-100011800	5.60114	1.10291e-38	3.61974	1.43581e-56	both	both	both
Tb427-020027500	3.64974	4.04853e-43	3.61001	1.00365e-109	both	both	both
Tb427-100026200	3.51978	8.01211e-07	3.605	1.85863e-50	both	both	both
Tb427-100167300	3.19849	0.000857096	3.60493	3.48985e-13	both	both	both
Tb427-050013300	4.79345	5.53206e-22	3.60478	4.58032e-61	both	both	both
Tb427-080040700	3.60182	6.70165e-28	3.60457	1.24356e-73	both	both	both
Tb427-090029500	2.10749	1.17338e-07	3.59999	2.92982e-30	both	both	both
Tb427-090078100	2.65731	1.02624e-14	3.59949	2.03446e-36	both	both	both
Tb427-100046400	5.35879	3.42574e-08	3.58545	2.40825e-11	both	both	both
Tb427-110014200	8.12	1.05383e-48	3.57679	3.07951e-65	both	both	both
Tb427-100095000	4.17776	1.79336e-16	3.57562	1.31057e-74	both	both	both
Tb427-110164800	2.60397	9.51136e-08	3.56954	8.77237e-29	both	both	both
Tb427-000636500:pseudogene	4.65825	7.36307e-06	3.55543	3.93506e-13	both	both	both
Tb427-090006600	3.85267	2.97198e-10	3.55084	2.38418e-58	both	both	both
Tb427-100147000	7.19645	3.81888e-09	3.53974	4.19667e-15	both	both	both
Tb427-040007200	5.27363	1.68649e-14	3.53213	1.34988e-35	both	both	both
Tb427-110180800	4.75056	4.22946e-08	3.52456	1.11127e-21	both	both	both
Tb427-040056500	4.52492	9.09904e-17	3.52272	6.22847e-41	both	both	both
Tb427-060042600	3.18438	5.02091e-09	3.51118	4.35902e-22	both	both	both
Tb427-030016700	3.44105	0.000893688	3.4925	4.9334e-12	both	both	both
Tb427-110186200	2.52439	0.000452428	3.48847	5.0562e-30	both	both	both
Tb427-050016600	2.2799	0.00758583	3.48838	1.82709e-26	both	both	both
Tb427-060015400	4.01146	2.03329e-11	3.47935	5.92866e-34	both	both	both
Tb427-110111500	4.10388	1.08079e-12	3.4765	2.96593e-72	both	both	both
Tb427-040051900	3.19605	0.00818213	3.47406	2.03838e-19	both	both	both
Tb427-070027700	3.6238	8.68405e-07	3.47275	2.38909e-33	both	both	both
Tb427-010023900	2.9166	5.93466e-43	3.46772	9.56207e-168	both	both	both
Tb427-110167300	5.43133	1.96921e-06	3.46427	1.55953e-23	both	both	both
Tb427-100095700	3.31655	3.01594e-18	3.45557	6.86675e-65	both	both	both
Tb427-010015000	5.52729	7.06875e-13	3.44651	1.199e-13	both	both	both
Tb427-070076600	4.22753	9.6915e-23	3.4344	6.44585e-87	both	both	both
Tb427-070045300	3.13548	2.18902e-14	3.39372	1.06659e-34	both	both	both
Tb427-110134700	2.49627	1.34525e-08	3.37767	2.60414e-33	both	both	both
Tb427-110056100	2.28592	0.00292981	3.3678	2.37078e-14	both	both	both
Tb427-020020300	2.03065	0.00131117	3.31283	1.52167e-22	both	both	both
Tb427-030055700	3.95785	1.62842e-12	3.31037	3.31558e-32	both	both	both
Tb427-090077400	2.26434	0.00602819	3.28818	1.28495e-11	both	both	both
Tb427-070079700	2.86632	2.59498e-12	3.28696	2.10768e-28	both	both	both
Tb427-080036300	3.69023	3.4466e-05	3.28496	2.45251e-31	both	both	both
Tb427-060056000	3.52018	1.16195e-07	3.2542	5.40076e-37	both	both	both
Tb427-110120500	2.46959	3.66825e-06	3.25372	2.06788e-18	both	both	both
Tb427-090070900	3.97193	7.97012e-11	3.23706	3.50819e-48	both	both	both
Tb427-080035100	3.17051	3.74514e-16	3.22649	1.62419e-63	both	both	both
Tb427-040019600	2.84509	2.51327e-05	3.20972	9.15119e-16	both	both	both
Tb427-070048700	2.28689	3.9912e-06	3.16988	2.47553e-22	both	both	both
Tb427-100011500	3.81411	7.24445e-39	3.16697	8.20069e-73	both	both	both
Tb427-070008300	2.17708	0.00311536	3.16469	3.97094e-31	both	both	both
Tb427-110079200	8.06868	1.70713e-109	3.16074	1.73441e-216	both	both	both
Tb427-040050400	7.96476	1.77092e-67	3.1551	2.09797e-69	both	both	both
Tb427-050031800	3.13663	2.83567e-06	3.15508	4.88897e-25	both	both	both
Tb427-110091600	2.83957	0.000589467	3.14876	9.63452e-18	both	both	both
Tb427-030019900	7.37986	3.16038e-23	3.145	1.48069e-33	both	both	both
Tb427-110023300	14.8204	1.22462e-50	3.13897	4.23098e-47	both	both	both
Tb427-070057300	5.01597	8.75292e-16	3.13463	9.8444e-54	both	both	both
Tb427-050052100	5.53159	2.96551e-18	3.12804	1.12091e-23	both	both	both
Tb427-080078700	3.12702	0.000101755	3.12511	5.47991e-14	both	both	both
Tb427-110023400	3.14595	1.81646e-05	3.11108	9.19382e-30	both	both	both
Tb427-030020100	3.5955	6.20261e-12	3.10794	8.76033e-14	both	both	both
Tb427-100138100	4.01206	1.43967e-15	3.09945	3.61212e-12	both	both	both
Tb427-110138400	3.1201	2.26765e-05	3.08154	1.3373e-12	both	both	both
Tb427-100039000	8.33338	3.28323e-13	3.07917	1.12645e-10	both	both	both
Tb427-110146500	4.45348	4.09586e-21	3.07749	1.27121e-32	both	both	both
Tb427-090027800	3.07057	1.84647e-08	3.07687	1.3999e-19	both	both	both
Tb427-040030200	2.52569	0.00232633	3.07442	3.28648e-16	both	both	both
Tb427-070075000	2.07322	0.00338194	3.06328	7.22523e-19	both	both	both
Tb427-110137500	5.29029	2.48342e-15	3.05515	1.48767e-24	both	both	both
Tb427-090008300	3.96842	3.93149e-07	3.05425	1.1283e-13	both	both	both
Tb427-070059400:pseudogene	1.95591	6.7064e-06	3.05151	3.49848e-29	both	both	both
Tb427-070028500	3.56047	4.12282e-10	3.03082	4.20234e-73	both	both	both
Tb427-070072900	4.74822	3.70511e-79	3.01938	8.7443e-93	both	both	both
Tb427-100140900	1.83517	0.000264021	3.01242	6.04945e-30	both	both	both
Tb427-110085200	6.50503	5.25039e-56	3.01045	2.51707e-25	both	both	both
Tb427-100051400	2.31091	0.000730328	3.00481	1.3377e-09	both	both	both
Tb427-100049900	3.19732	4.78137e-06	2.99946	7.88006e-26	both	both	both
Tb427-030038800	4.44631	3.0254e-20	2.99577	1.24002e-13	both	both	both
Tb427-100134100	4.10187	1.87954e-64	2.99203	1.14746e-43	both	both	both
Tb427-080072900	3.60989	5.714e-110	2.97042	8.2453e-196	both	both	both
Tb427-110130800	2.69935	2.46875e-14	2.95676	5.10561e-45	both	both	both
Tb427-100089300	5.18716	7.88082e-20	2.94776	2.79983e-52	both	both	both
Tb427-080068700	3.08563	4.08901e-14	2.94454	7.63915e-39	both	both	both
Tb427-090059100	3.24999	5.99913e-13	2.94248	9.98205e-52	both	both	both
Tb427-040037000	5.66866	2.33036e-13	2.9422	1.63326e-16	both	both	both
Tb427-010011200	4.03099	2.47804e-09	2.94009	1.02075e-25	both	both	both
Tb427-050042800	3.36878	8.92579e-05	2.93502	1.92435e-14	both	both	both
Tb427-060032700	2.80095	4.66494e-07	2.93404	7.54551e-26	both	both	both
Tb427-110038000	2.03787	0.000124145	2.9315	7.31331e-25	both	both	both
Tb427-090022100	3.46566	1.07738e-34	2.92437	1.46025e-62	both	both	both
Tb427-100160600	2.24059	0.000368789	2.90449	1.49809e-15	both	both	both
Tb427-090012000	2.02582	0.000167286	2.89386	2.01804e-14	both	both	both
Tb427-000274500:pseudogene	4.10045	0.00139067	2.89061	4.90697e-09	both	both	both
Tb427-090013700	2.82936	3.58445e-09	2.88926	9.82179e-22	both	both	both
Tb427-100143700	3.39824	1.62316e-06	2.88926	2.67187e-14	both	both	both
Tb427-040025000	5.57269	4.46057e-18	2.86927	1.20102e-30	both	both	both
Tb427-100046000	3.35945	2.79738e-05	2.846	3.0834e-23	both	both	both
Tb427-060035700	2.96608	5.90295e-05	2.8446	4.81899e-13	both	both	both
Tb427-110081300	1.992	9.68133e-07	2.84284	3.68834e-15	both	both	both
Tb427-030057000	2.82881	4.73163e-22	2.84146	6.14847e-80	both	both	both
Tb427-110124800	2.66871	9.86027e-12	2.83677	1.26494e-18	both	both	both
Tb427-110089900	4.42891	1.34493e-27	2.82848	3.01516e-46	both	both	both
Tb427-110160700	6.58183	4.87982e-11	2.81431	3.23773e-11	both	both	both
Tb427-080039600	2.31248	4.42131e-05	2.81184	1.45364e-11	both	both	both
Tb427-020030100	5.56532	3.6699e-09	2.81118	7.3488e-21	both	both	both
Tb427-100014200	3.10458	7.95359e-09	2.80569	8.63533e-19	both	both	both
Tb427-040037500	2.44874	4.76646e-06	2.80446	2.47368e-25	both	both	both
Tb427-090008000	5.95087	3.51608e-31	2.80339	4.15654e-22	both	both	both
Tb427-060041300	2.54909	1.19165e-11	2.80082	2.4621e-14	both	both	both
Tb427-030050500	2.38569	1.2599e-12	2.79738	3.68906e-32	both	both	both
Tb427-090071900	3.47686	8.6291e-10	2.79647	2.60902e-26	both	both	both
Tb427-110187000	3.86078	1.89176e-31	2.77791	8.10487e-58	both	both	both
Tb427-110050200	2.77684	9.3667e-14	2.77143	3.45992e-25	both	both	both
Tb427-090042800	4.4607	4.30222e-25	2.76538	5.27375e-55	both	both	both
Tb427-030056400	2.96672	8.96565e-08	2.76343	8.89676e-21	both	both	both
Tb427-070063200	8.45655	5.68372e-56	2.75831	3.81921e-28	both	both	both
Tb427-110098700	4.40581	7.89473e-36	2.75277	4.19444e-53	both	both	both
Tb427-110181600	1.80458	1.11417e-10	2.74693	1.21246e-101	both	both	both
Tb427-030013900	2.34695	3.76281e-05	2.74623	1.35035e-31	both	both	both
Tb427-100097800	2.12832	0.00105733	2.74075	1.10291e-15	both	both	both
Tb427-100044300	3.75591	1.3037e-10	2.73613	1.61537e-30	both	both	both
Tb427-100125300	3.46987	6.72314e-28	2.73231	1.11391e-35	both	both	both
Tb427-050025500	2.44834	0.000495462	2.73204	1.22377e-15	both	both	both
Tb427-100134600	3.28727	1.20053e-24	2.71524	7.1303e-26	both	both	both
Tb427-090034100	4.18613	2.55334e-29	2.70359	2.41524e-26	both	both	both
Tb427-030040300	1.77863	3.85473e-30	2.70114	0	both	both	both
Tb427-110082500	4.97725	9.35363e-52	2.68634	1.99552e-89	both	both	both
Tb427-100124100	2.39488	6.71501e-09	2.68526	5.66378e-20	both	both	both
Tb427-100096100	4.78003	8.08033e-70	2.68458	7.7374e-56	both	both	both
Tb427-110053500	2.97264	0.000269341	2.68388	2.50326e-34	both	both	both
Tb427-110152700	5.29236	2.94845e-132	2.68109	3.98639e-186	both	both	both
Tb427-100153300	5.19861	5.714e-110	2.6652	1.82281e-65	both	both	both
Tb427-070037000	1.92548	1.3984e-05	2.66387	9.1176e-31	both	both	both
Tb427-110091400	4.04193	1.54088e-33	2.65885	7.6487e-67	both	both	both
Tb427-030037700	6.4998	6.05804e-93	2.65875	1.13337e-176	both	both	both
Tb427-110045400	1.89712	1.90903e-06	2.6577	9.32465e-13	both	both	both
Tb427-110121900	2.69504	3.6416e-27	2.65205	1.13187e-69	both	both	both
Tb427-070069600	2.39185	1.45073e-05	2.64447	1.05415e-14	both	both	both
Tb427-030014700	1.87007	2.96828e-05	2.64376	0.00752311	both	both	both
Tb427-030041100	6.20601	5.85061e-16	2.6394	9.10749e-11	both	both	both
Tb427-060037900	3.08657	2.08448e-06	2.6379	1.70563e-11	both	both	both
Tb427-060009100	4.08504	2.41277e-06	2.63172	1.0711e-09	both	both	both
Tb427-090059900	1.65846	0.00163626	2.60839	1.49081e-52	both	both	both
Tb427-070041400	3.89715	5.417e-21	2.6077	3.54318e-31	both	both	both
Tb427-110050600	3.43836	1.54466e-13	2.60616	2.36431e-21	both	both	both
Tb427-090092200	3.39495	8.47956e-10	2.59143	1.48405e-07	both	both	both
Tb427-080078900	3.04819	2.17703e-09	2.58539	1.92714e-37	both	both	both
Tb427-030022800	3.70995	4.62242e-59	2.5835	1.93198e-117	both	both	both
Tb427-050010000	2.87631	5.96006e-05	2.57747	3.37937e-19	both	both	both
Tb427-110140900	3.75469	3.36225e-43	2.57653	7.34016e-57	both	both	both
Tb427-080069900	2.1876	0.00427035	2.57201	7.08473e-16	both	both	both
Tb427-020019300	5.8443	3.71511e-06	2.5714	1.85448e-12	both	both	both
Tb427-110171600	2.53416	1.26553e-07	2.57123	1.14797e-20	both	both	both
Tb427-080048400	4.60985	7.68236e-05	2.56668	6.73691e-05	both	both	both
Tb427-110073900	2.8175	2.36103e-05	2.55491	2.19795e-16	both	both	both
Tb427-100117300	1.88267	0.00183236	2.55264	2.94775e-26	both	both	both
Tb427-100118400	5.46159	1.21832e-05	2.5452	6.02156e-16	both	both	both
Tb427-070069300	3.41007	9.07824e-41	2.53766	5.62396e-56	both	both	both
Tb427-110124600	3.63761	1.20482e-29	2.52918	6.96454e-95	both	both	both
Tb427-110088100	7.35001	1.5771e-34	2.5122	6.47544e-23	both	both	both
Tb427-110095000	2.8658	1.11688e-08	2.50216	4.1924e-09	both	both	both
Tb427-100151500	2.81491	6.85576e-18	2.50161	9.17922e-16	both	both	both
Tb427-100088200	2.08681	0.00565993	2.50062	3.16782e-17	both	both	both
Tb427-110132300	4.03493	0.000168702	2.49939	3.85196e-19	both	both	both
Tb427-100105500	2.59715	1.52604e-08	2.49807	8.80285e-33	both	both	both
Tb427-080006300	6.85004	4.73163e-22	2.49432	1.40284e-28	both	both	both
Tb427-080042800	3.61264	2.82766e-26	2.48316	1.42092e-30	both	both	both
Tb427-030008900	2.9028	1.59439e-10	2.47954	1.42169e-20	both	both	both
Tb427-100099600	3.33367	2.68551e-13	2.47927	1.70206e-20	both	both	both
Tb427-090051300	3.42322	1.89584e-07	2.47255	1.36131e-06	both	both	both
Tb427-070046300	2.97336	1.81795e-05	2.47081	5.622e-08	both	both	both
Tb427-090056000	2.69791	0.000199783	2.46762	2.52334e-19	both	both	both
Tb427-110139200	3.25053	3.01558e-06	2.46334	1.33842e-12	both	both	both
Tb427-010014800	2.93727	3.58276e-11	2.45728	3.06951e-23	both	both	both
Tb427-100163000	3.13422	9.83116e-12	2.45626	2.00654e-12	both	both	both
Tb427-080010900	3.76018	1.00994e-08	2.45539	1.50533e-08	both	both	both
Tb427-110024200	2.74294	3.85638e-06	2.45034	6.15141e-09	both	both	both
Tb427-080053900	3.16219	5.26794e-08	2.44878	4.25866e-29	both	both	both
Tb427-060016600	3.78544	0.000126984	2.4465	8.77143e-10	both	both	both
Tb427-010022700	3.66231	6.45684e-17	2.44285	4.10867e-57	both	both	both
Tb427-070057600	2.507	4.64232e-06	2.42434	7.79583e-09	both	both	both
Tb427-070062400	3.36176	9.69154e-15	2.41767	1.3999e-14	both	both	both
Tb427-110095200	2.72213	1.40091e-10	2.41468	6.12958e-18	both	both	both
Tb427-110169200	2.7767	4.0062e-06	2.41252	2.84375e-25	both	both	both
Tb427-070011500	2.73544	5.29048e-05	2.4089	1.02715e-05	both	both	both
Tb427-070056100	2.78203	1.75312e-08	2.40692	5.8144e-21	both	both	both
Tb427-060019500	2.69419	4.68863e-18	2.4044	2.55685e-28	both	both	both
Tb427-090076200	4.40106	6.23542e-19	2.40435	3.44023e-19	both	both	both
Tb427-110154700	2.73006	3.94075e-06	2.39633	6.89222e-23	both	both	both
Tb427-100125900	5.19696	1.44256e-10	2.38399	2.95733e-12	both	both	both
Tb427-100043800	3.05628	7.74683e-21	2.38248	1.08845e-44	both	both	both
Tb427-040021400	3.42363	1.52753e-39	2.37942	1.36918e-184	both	both	both
Tb427-050048400	2.06553	0.00225711	2.37643	1.76929e-19	both	both	both
Tb427-100063200	4.69304	5.08846e-18	2.3758	2.21215e-21	both	both	both
Tb427-010012500	2.00008	4.40329e-06	2.36065	9.53815e-34	both	both	both
Tb427-100149200	6.68817	1.60497e-08	2.35993	4.45678e-09	both	both	both
Tb427-110147800	2.38093	3.94665e-07	2.357	3.03862e-20	both	both	both
Tb427-100069400	2.51295	0.000737797	2.34684	0.000156679	both	both	both
Tb427-100046300	2.54764	6.16871e-11	2.34514	3.05373e-18	both	both	both
Tb427-110128700	2.56616	0.000753588	2.34422	1.3697e-14	both	both	both
Tb427-070081600:pseudogene	3.29805	0.000149365	2.33254	1.08226e-09	both	both	both
Tb427-110180600	2.67969	2.58325e-09	2.32955	1.00373e-15	both	both	both
Tb427-080068300	4.67896	5.47973e-09	2.3211	5.01285e-09	both	both	both
Tb427-110015600:pseudogene	7.79818	2.68862e-14	2.31962	2.03368e-14	both	both	both
Tb427-080054800	2.91164	1.14241e-05	2.31928	3.62921e-56	both	both	both
Tb427-030027300	6.94536	5.13202e-16	2.31172	4.22714e-14	both	both	both
Tb427-070039400	3.08335	2.82526e-09	2.30196	6.63287e-22	both	both	both
Tb427-110120200	2.69843	4.7587e-07	2.29457	1.3877e-13	both	both	both
Tb427-100006600	11.4754	8.24949e-06	2.28862	0.00241532	both	both	both
Tb427-100033800	3.723	9.02214e-10	2.28862	3.87597e-13	both	both	both
Tb427-040030800	3.96692	1.86311e-42	2.28447	8.35398e-49	both	both	both
Tb427-050036000	4.26023	3.72445e-24	2.27872	5.98499e-59	both	both	both
Tb427-100077200	1.95073	5.54689e-13	2.27431	6.21767e-65	both	both	both
Tb427-090064400	3.84986	7.01036e-07	2.26702	3.24943e-11	both	both	both
Tb427-110141300	2.90387	0.00694828	2.26321	7.81231e-05	both	both	both
Tb427-110067000	5.8106	7.91257e-24	2.24502	1.3818e-77	both	both	both
Tb427-060053400	5.02705	1.60898e-24	2.23949	8.78671e-40	both	both	both
Tb427-110096100	2.49659	2.17111e-16	2.23829	8.80807e-21	both	both	both
Tb427-100064100	2.10074	0.00226591	2.23728	1.64493e-11	both	both	both
Tb427-110167200	4.31303	8.7333e-83	2.23379	6.4021e-36	both	both	both
Tb427-030008000	2.66308	0.000191469	2.23249	3.29469e-14	both	both	both
Tb427-080042900	3.43978	1.8346e-12	2.23198	3.00893e-21	both	both	both
Tb427-050046900	6.03345	9.6246e-20	2.22547	3.73653e-09	both	both	both
Tb427-060016500	2.56571	0.00036356	2.22275	2.83505e-12	both	both	both
Tb427-010006400	2.28464	0.000115825	2.22115	2.52023e-13	both	both	both
Tb427-100140400	1.96437	0.00101179	2.21864	6.19886e-15	both	both	both
Tb427-100127700	1.7468	1.14083e-08	2.2143	1.3465e-14	both	both	both
Tb427-030011500	2.61457	4.21041e-07	2.20969	2.5462e-16	both	both	both
Tb427-100079100	3.9503	1.20756e-08	2.20861	2.14862e-12	both	both	both
Tb427-070053400	2.413	5.0777e-06	2.2073	1.21442e-12	both	both	both
Tb427-100148300	2.79459	8.04476e-13	2.20498	1.64394e-20	both	both	both
Tb427-010020200	2.58404	8.50871e-50	2.20244	7.95978e-70	both	both	both
Tb427-040028500	2.28952	0.00736452	2.20082	2.90637e-05	both	both	both
Tb427-030018700	4.23889	1.11428e-47	2.19922	2.93545e-91	both	both	both
Tb427-030046300	3.50099	1.65786e-55	2.19607	2.52341e-16	both	both	both
Tb427-100130600	3.50869	2.65142e-11	2.19021	1.55047e-11	both	both	both
Tb427-070020300	2.82986	5.35393e-13	2.19005	9.25828e-18	both	both	both
Tb427-040033800	3.71085	1.49201e-07	2.18404	1.01092e-06	both	both	both
Tb427-110070300	3.60704	1.85085e-26	2.17819	4.49187e-21	both	both	both
Tb427-030053500	3.47937	3.59244e-31	2.17534	9.66998e-60	both	both	both
Tb427-070068600	3.38453	1.5601e-22	2.17271	6.02685e-47	both	both	both
Tb427-000781200:pseudogene	3.28918	5.9829e-05	2.17036	0.000185075	both	both	both
Tb427-080068100	4.07825	1.92482e-131	2.1702	8.6017e-83	both	both	both
Tb427-110150500	2.01161	6.78433e-49	2.17003	4.11745e-194	both	both	both
Tb427-110142900	2.12548	0.00120574	2.16881	2.59963e-14	both	both	both
Tb427-090062200	2.3939	0.00286811	2.16394	7.68072e-10	both	both	both
Tb427-030023000	2.65897	5.11095e-09	2.16317	4.44434e-19	both	both	both
Tb427-100037900	3.28027	3.52778e-07	2.16176	2.59725e-34	both	both	both
Tb427-100094500	1.55243	0.00393648	2.1611	7.08653e-11	both	both	both
Tb427-050033400	3.67797	0.00262892	2.15988	1.97622e-07	both	both	both
Tb427-100140000	4.38276	1.59528e-15	2.15566	1.25252e-12	both	both	both
Tb427-110016000	3.55825	3.75118e-44	2.15342	2.16242e-59	both	both	both
Tb427-100044200	3.54294	5.70978e-15	2.15177	3.2533e-40	both	both	both
Tb427-090025700	1.98557	1.49526e-59	2.15052	1.911e-32	both	both	both
Tb427-090063900	3.39979	5.32097e-21	2.14923	6.08771e-28	both	both	both
Tb427-100084400	2.0586	0.0092968	2.14784	1.79766e-05	both	both	both
Tb427-110088900	2.60867	2.31287e-07	2.13973	2.2267e-12	both	both	both
Tb427-110132900	3.20242	0.000152729	2.1354	5.87341e-09	both	both	both
Tb427-030012100	3.03411	6.38738e-06	2.13455	2.72275e-20	both	both	both
Tb427-040052800	2.13126	8.39916e-10	2.12879	1.15504e-103	both	both	both
Tb427-100041000	3.45758	3.37465e-46	2.12399	1.57764e-72	both	both	both
Tb427-110138800	2.31503	9.64499e-33	2.12308	5.43534e-67	both	both	both
Tb427-060053000	2.43529	1.21331e-10	2.11807	7.22707e-33	both	both	both
Tb427-100052700	2.23689	0.00449082	2.11775	1.45335e-08	both	both	both
Tb427-110045900	2.24072	6.46535e-14	2.11714	4.86579e-17	both	both	both
Tb427-070027800	1.80624	3.83676e-05	2.11455	1.62562e-17	both	both	both
Tb427-030028700	6.26842	3.99419e-08	2.10408	5.57167e-09	both	both	both
Tb427-110169500	3.5504	3.01864e-163	2.10398	4.51889e-120	both	both	both
Tb427-070012600	2.00634	3.3501e-18	2.09621	2.86215e-32	both	both	both
Tb427-100068000	1.80079	0.000468075	2.0952	1.14853e-18	both	both	both
Tb427-110068700	2.17147	2.4375e-15	2.0944	7.17349e-24	both	both	both
Tb427-090008100	3.47848	2.80441e-09	2.09408	1.80794e-08	both	both	both
Tb427-100153200	3.01752	7.13666e-61	2.08784	4.63751e-85	both	both	both
Tb427-110136400	3.03012	0.00418042	2.08769	0.000113954	both	both	both
Tb427-090030500	2.62132	5.6668e-06	2.08638	3.87067e-07	both	both	both
Tb427-100011600	2.15033	9.09976e-40	2.08259	8.26913e-44	both	both	both
Tb427-110175900	3.0238	1.43907e-06	2.08061	0.000378658	both	both	both
Tb427-060032400:pseudogene	3.83533	2.22045e-10	2.07916	4.23558e-10	both	both	both
Tb427-030031700	2.97417	2.40128e-08	2.07814	2.7237e-12	both	both	both
Tb427-100068500	3.16683	9.76437e-11	2.07685	2.55239e-18	both	both	both
Tb427-110019200	1.92161	3.65059e-14	2.07576	3.11926e-12	both	both	both
Tb427-040019700	2.20763	6.79615e-18	2.07493	5.97841e-17	both	both	both
Tb427-100016900	1.98903	2.36007e-10	2.07288	9.51128e-50	both	both	both
Tb427-100152200	2.10996	0.000388835	2.06918	3.65044e-14	both	both	both
Tb427-100033200	1.87224	3.47287e-14	2.06807	1.59929e-39	both	both	both
Tb427-050009300	2.03436	6.20179e-08	2.06702	1.29e-28	both	both	both
Tb427-040050500	3.83704	3.12748e-57	2.06669	1.03469e-29	both	both	both
Tb427-040031600	2.17857	2.63321e-06	2.0658	3.53144e-14	both	both	both
Tb427-110090100	2.51962	9.63943e-08	2.06518	8.70094e-07	both	both	both
Tb427-110085500	2.21795	0.00567333	2.06262	7.37496e-06	both	both	both
Tb427-100069300	3.06739	8.00369e-13	2.06124	3.65479e-21	both	both	both
Tb427-080044700	6.05863	2.80396e-35	2.06106	1.18333e-21	both	both	both
Tb427-050039100	2.19527	7.33962e-05	2.06101	2.06855e-14	both	both	both
Tb427-110123200	2.55886	3.49351e-15	2.05794	2.32744e-30	both	both	both
Tb427-090045800	2.56973	5.59728e-14	2.05691	2.9134e-23	both	both	both
Tb427-090016400	4.48339	1.55957e-41	2.05339	1.17555e-08	both	both	both
Tb427-010027900:pseudogene	3.05238	1.25462e-06	2.05204	2.83534e-14	both	both	both
Tb427-110181700	2.48291	5.30988e-13	2.04894	9.1892e-27	both	both	both
Tb427-100074200	3.70968	1.70075e-05	2.04454	0.000447169	both	both	both
Tb427-050015100	3.73603	6.45616e-06	2.03602	6.70395e-06	both	both	both
Tb427-050048300	2.95326	1.21322e-24	2.03297	8.61107e-24	both	both	both
Tb427-030028100	2.27796	0.00474646	2.03145	4.11239e-10	both	both	both
Tb427-030029500	2.36918	7.1747e-08	2.03004	3.58174e-17	both	both	both
Tb427-110183500	2.26867	6.30533e-06	2.02745	1.36896e-11	both	both	both
Tb427-100161500	2.72071	5.6672e-17	2.02688	4.81566e-11	both	both	both
Tb427-040015000	2.88337	2.04082e-23	2.02558	7.93827e-54	both	both	both
Tb427-040013900	206.499	0.00944326	2.02279	0.00494396	both	both	both
Tb427-020016400	5.17373	4.28428e-10	2.02187	2.09139e-18	both	both	both
Tb427-080041000	4.03381	5.83909e-32	2.01118	1.14135e-23	both	both	both
Tb427-080070700	2.75529	4.95738e-13	2.00791	4.86579e-17	both	both	both
Tb427-080036100	2.62201	1.41271e-07	2.00745	5.1767e-10	both	both	both
Tb427-070042100	2.32365	1.80447e-06	2.00701	2.44805e-09	both	both	both
Tb427-080027800	3.23685	3.14284e-44	2.00186	4.82856e-32	both	both	both
Tb427-070023900	1.90882	0.000791455	1.99886	5.72686e-18	both	both	both
Tb427-110015300	2.22248	2.78849e-08	1.99424	9.95244e-09	both	both	both
Tb427-080017700	2.05179	0.000750861	1.99286	5.7383e-20	both	both	both
Tb427-020011600	2.38977	3.32625e-27	1.98995	2.28651e-93	both	both	both
Tb427-100010600	1.57976	0.000322052	1.98901	3.68635e-08	both	both	both
Tb427-040019200	2.23245	3.32066e-10	1.98849	3.54141e-18	both	both	both
Tb427-110127400	2.4465	5.52977e-07	1.98726	1.42016e-07	both	both	both
Tb427-050012400	2.60436	2.18265e-10	1.98466	1.53486e-53	both	both	both
Tb427-050022200	3.82961	1.72829e-19	1.98405	7.45359e-21	both	both	both
Tb427-070034900	3.3681	5.44969e-15	1.98185	8.13571e-09	both	both	both
Tb427-050046400	2.45897	0.00323932	1.97892	7.92296e-05	both	both	both
Tb427-110061300	1.96178	1.57756e-05	1.97815	0.00024257	both	both	both
Tb427-080023700	2.07115	5.98627e-25	1.97683	2.29701e-18	both	both	both
Tb427-050039300	2.94223	2.68249e-09	1.97372	6.83556e-13	both	both	both
Tb427-050025700	3.59773	3.3706e-13	1.96418	1.83419e-16	both	both	both
Tb427-100038800	4.54862	5.14666e-47	1.96157	1.20526e-43	both	both	both
Tb427-090052200	3.47827	0.000186661	1.96091	1.53562e-07	both	both	both
Tb427-100052800	1.85514	0.00688016	1.96073	9.30362e-10	both	both	both
Tb427-080008000	2.74723	8.41594e-07	1.95887	1.66837e-07	both	both	both
Tb427-110033100	2.60544	1.96701e-07	1.95832	2.78465e-07	both	both	both
Tb427-080064800	1.99647	0.000597699	1.95637	3.06675e-15	both	both	both
Tb427-110100300	2.40833	0.00786079	1.95238	0.00447226	both	both	both
Tb427-040027000	2.63231	7.06746e-18	1.95108	2.54186e-37	both	both	both
Tb427-100078400	3.5571	4.255e-11	1.95001	2.73158e-19	both	both	both
Tb427-000481600:pseudogene	2.90939	1.2208e-11	1.94982	0.00012438	both	both	both
Tb427-100113000	2.50359	6.53835e-07	1.94927	5.80756e-21	both	both	both
Tb427-080017800	3.01111	1.64184e-55	1.94432	2.66278e-62	both	both	both
Tb427-110060200	3.9691	2.6746e-23	1.94406	3.87235e-14	both	both	both
Tb427-090042300	2.0733	2.74935e-06	1.94403	0.00373509	both	both	both
Tb427-110125400	3.12226	1.31016e-113	1.94323	7.0828e-54	both	both	both
Tb427-060026700	2.89381	0.00098106	1.94268	0.000137656	both	both	both
Tb427-110090700	2.69856	2.35916e-05	1.94235	2.74778e-09	both	both	both
Tb427-110037600	3.25502	1.31977e-127	1.94131	4.05988e-107	both	both	both
Tb427-050041800	2.18806	3.22857e-07	1.93424	2.6485e-10	both	both	both
Tb427-100080200	2.25391	1.16515e-06	1.93075	1.70799e-13	both	both	both
Tb427-090059800	3.05906	4.52517e-28	1.93056	1.15499e-17	both	both	both
Tb427-100059800	2.39886	1.96378e-05	1.92905	1.19948e-07	both	both	both
Tb427-080045900	3.8674	7.81632e-29	1.92457	0.00230413	both	both	both
Tb427-110021700	3.04271	1.47334e-07	1.92395	1.50685e-16	both	both	both
Tb427-090024900	2.86998	5.24475e-18	1.91981	4.362e-23	both	both	both
Tb427-100058100	1.89142	5.78085e-05	1.91978	5.15041e-12	both	both	both
Tb427-040019500	2.45327	4.81067e-06	1.91951	7.52861e-09	both	both	both
Tb427-090056100	3.25386	4.19482e-56	1.91723	4.31249e-41	both	both	both
Tb427-110007000	3.66167	5.11994e-07	1.91455	3.11316e-09	both	both	both
Tb427-100150600	1.95123	2.24059e-06	1.91337	5.72827e-06	both	both	both
Tb427-010008300	2.26452	8.33248e-11	1.91082	1.50746e-15	both	both	both
Tb427-110055100	5.50705	2.54685e-60	1.91042	1.16282e-64	both	both	both
Tb427-110102400	2.8633	2.17814e-17	1.90952	2.99121e-25	both	both	both
Tb427-040050900	3.37303	1.94864e-17	1.9052	4.81531e-32	both	both	both
Tb427-100097100	4.45039	2.53319e-15	1.90451	5.55838e-12	both	both	both
Tb427-040028400	2.16788	7.29474e-05	1.89717	3.87773e-17	both	both	both
Tb427-110147000	3.55614	2.33745e-20	1.89703	1.89423e-28	both	both	both
Tb427-090079300	1.89641	0.00978495	1.8936	1.66698e-09	both	both	both
Tb427-090077200	2.69327	7.56636e-07	1.89099	6.13953e-11	both	both	both
Tb427-090047400	2.05867	0.000975977	1.89066	7.01362e-10	both	both	both
Tb427-090080400	2.93774	1.32895e-35	1.88962	3.24653e-38	both	both	both
Tb427-110121400	2.07207	0.000562674	1.88661	1.05432e-09	both	both	both
Tb427-110128300	2.60733	1.48261e-25	1.88597	1.0058e-26	both	both	both
Tb427-080046800	2.93735	1.10679e-118	1.88147	1.31433e-167	both	both	both
Tb427-100083500	2.57862	8.88727e-15	1.88015	4.78123e-23	both	both	both
Tb427-000276300	3.00824	0.000701857	1.87977	1.69502e-06	both	both	both
Tb427-080034600	2.16748	0.000976901	1.87865	7.27226e-08	both	both	both
Tb427-030009000	2.30851	8.24995e-101	1.87639	5.76365e-154	both	both	both
Tb427-100161200	2.45322	9.68307e-66	1.8753	6.76901e-149	both	both	both
Tb427-050017000	3.41089	3.89441e-56	1.87464	6.17506e-56	both	both	both
Tb427-010029200	3.2564	5.69046e-13	1.87435	3.68045e-18	both	both	both
Tb427-110072100	2.77395	6.12569e-07	1.87205	1.28477e-09	both	both	both
Tb427-030039300	2.83194	3.15931e-09	1.87188	4.21716e-12	both	both	both
Tb427-070038600	2.61811	4.51893e-38	1.87082	2.00151e-67	both	both	both
Tb427-020005300	2.58635	0.000142425	1.86907	2.57802e-09	both	both	both
Tb427-090055300	2.12379	7.27207e-07	1.86865	3.5509e-15	both	both	both
Tb427-110054300	3.16569	3.00654e-14	1.86805	1.1852e-26	both	both	both
Tb427-050029500	2.74397	1.80467e-05	1.8672	1.20025e-17	both	both	both
Tb427-110132000	2.66173	3.91942e-10	1.86669	9.04538e-18	both	both	both
Tb427-020029700	2.6044	7.10283e-17	1.86664	2.56816e-14	both	both	both
Tb427-110152600	4.75016	6.36136e-52	1.86562	1.23511e-15	both	both	both
Tb427-080045400	3.09624	2.13779e-13	1.86405	0.00207212	both	both	both
Tb427-060038000	2.55882	1.18227e-08	1.86402	4.2292e-10	both	both	both
Tb427-110127600	1.93964	1.07593e-08	1.86121	2.89695e-15	both	both	both
Tb427-070060100	2.57317	0.00199979	1.8536	0.000575587	both	both	both
Tb427-080048900	2.08952	3.67509e-16	1.8535	3.71102e-13	both	both	both
Tb427-040019800	2.68588	0.000335774	1.85235	1.1879e-06	both	both	both
Tb427-110061900	2.59532	3.07416e-08	1.8511	2.15672e-12	both	both	both
Tb427-110085800	2.96994	3.17047e-13	1.8495	5.03566e-13	both	both	both
Tb427-060051600	2.22951	1.03556e-09	1.84802	9.02106e-13	both	both	both
Tb427-090068000	3.53465	0.000215402	1.84733	3.59601e-10	both	both	both
Tb427-090032500	1.91353	0.00651636	1.84176	1.62611e-05	both	both	both
Tb427-040012300	2.85281	0.00595254	1.83946	0.00125869	both	both	both
Tb427-110169800	2.98023	1.12759e-25	1.83741	1.15851e-22	both	both	both
Tb427-100123100	3.00423	4.22867e-08	1.83707	1.34471e-11	both	both	both
Tb427-030019600	3.64718	2.6164e-06	1.83695	7.15965e-13	both	both	both
Tb427-090082800	2.28157	2.68072e-06	1.83636	8.3919e-11	both	both	both
Tb427-090045600	1.95182	0.000214426	1.83494	6.02412e-09	both	both	both
Tb427-040005500	2.04782	1.14902e-05	1.83463	6.24053e-14	both	both	both
Tb427-100023700:pseudogene	2.29922	0.00943056	1.83418	3.04675e-18	both	both	both
Tb427-070068900	2.31691	0.000119001	1.8332	3.21886e-08	both	both	both
Tb427-110147200	2.92646	9.82573e-11	1.83318	3.40799e-06	both	both	both
Tb427-110032800	3.83608	4.78612e-38	1.83253	1.08938e-27	both	both	both
Tb427-090082500	2.6503	4.94108e-34	1.8322	6.41724e-49	both	both	both
Tb427-080037000	1.88303	9.67175e-12	1.83173	1.34022e-28	both	both	both
Tb427-020026400	2.05153	5.93159e-08	1.83057	4.21779e-33	both	both	both
Tb427-100023300	3.04908	8.00213e-08	1.82708	6.76632e-13	both	both	both
Tb427-110018800	2.21536	1.89947e-22	1.82658	4.21759e-22	both	both	both
Tb427-070043700	2.62734	0.000468075	1.82441	4.41994e-05	both	both	both
Tb427-080038000	2.64859	1.05123e-06	1.82351	7.75448e-05	both	both	both
Tb427-090038100	2.05937	0.000190023	1.82309	6.70995e-17	both	both	both
Tb427-060032300	1.96376	0.000875093	1.8214	8.0495e-06	both	both	both
Tb427-030024500	2.88447	1.74852e-23	1.82126	2.19627e-50	both	both	both
Tb427-100135400	1.79329	2.04491e-30	1.82041	5.68809e-17	both	both	both
Tb427-010024600	3.3557	6.55163e-15	1.81956	3.83627e-17	both	both	both
Tb427-080038600	2.17299	1.36062e-10	1.81822	3.91494e-14	both	both	both
Tb427-110178000	2.08399	2.81524e-30	1.81711	1.50606e-72	both	both	both
Tb427-100126200	1.5904	0.000288137	1.8159	0.000278675	both	both	both
Tb427-030010200	2.8753	2.14725e-15	1.81531	7.70112e-22	both	both	both
Tb427-100009700	2.50823	1.11479e-10	1.81454	1.03133e-07	both	both	both
Tb427-100056100	2.27819	0.000154145	1.81357	6.20004e-17	both	both	both
Tb427-040037200	2.40782	5.0093e-07	1.81159	1.15858e-13	both	both	both
Tb427-080086300:pseudogene	2.50409	0.00182902	1.80972	4.35081e-05	both	both	both
Tb427-100161000	2.07089	1.61646e-05	1.80886	3.84534e-15	both	both	both
Tb427-080057600	1.83008	0.0020786	1.80762	1.41547e-06	both	both	both
Tb427-010028500	1.94698	2.12991e-08	1.80642	5.79725e-20	both	both	both
Tb427-100165500	2.69393	0.000141729	1.80588	2.17071e-08	both	both	both
Tb427-110030300	2.1962	1.9666e-35	1.80484	8.10864e-31	both	both	both
Tb427-060011600	1.93582	2.78169e-09	1.80251	9.58397e-07	both	both	both
Tb427-090068500	2.0195	0.00920293	1.8015	9.66367e-08	both	both	both
Tb427-020021100	1.74751	3.94143e-07	1.8014	3.29406e-09	both	both	both
Tb427-080088300	2.61961	3.47319e-16	1.799	0.000677347	both	both	both
Tb427-010011400	2.53413	8.78292e-05	1.79581	3.493e-07	both	both	both
Tb427-070046400	2.35252	5.93004e-08	1.79453	1.71972e-12	both	both	both
Tb427-110011700	3.60953	1.00542e-27	1.79343	1.11501e-26	both	both	both
Tb427-030016400	3.04528	1.46301e-09	1.79303	8.17208e-11	both	both	both
Tb427-070011600	2.34115	6.05435e-16	1.79059	1.28812e-18	both	both	both
Tb427-110069000	2.47501	1.93535e-21	1.78826	3.19254e-24	both	both	both
Tb427-110047300	6.52295	2.2508e-35	1.78737	1.38845e-10	both	both	both
Tb427-080053500	2.71764	6.81141e-07	1.78602	0.000525244	both	both	both
Tb427-100031100	2.10865	0.000436993	1.7827	1.06822e-12	both	both	both
Tb427-110132500	1.56187	0.000831327	1.78105	2.02493e-07	both	both	both
Tb427-070018300	2.68796	0.000108848	1.78099	4.20039e-07	both	both	both
Tb427-060051300	1.71852	7.43631e-05	1.78053	9.1887e-08	both	both	both
Tb427-100037200	2.90573	1.31257e-17	1.78026	2.81546e-11	both	both	both
Tb427-080029100	3.5346	2.07994e-06	1.7794	9.35086e-05	both	both	both
Tb427-110077700	2.19681	0.00821004	1.77939	7.53613e-05	both	both	both
Tb427-110062500	2.17068	0.0002038	1.77902	1.84826e-06	both	both	both
Tb427-100132600	1.95295	0.00107755	1.77849	1.19587e-11	both	both	both
Tb427-110080100	3.37908	8.9964e-05	1.7781	2.13608e-10	both	both	both
Tb427-090070000	1.96189	0.00113368	1.77773	1.44526e-13	both	both	both
Tb427-110106500	2.43783	0.000427024	1.77691	2.74176e-07	both	both	both
Tb427-040018700	2.27976	4.70605e-10	1.77615	7.91539e-05	both	both	both
Tb427-070013600	3.32885	0.000149415	1.77577	3.53616e-05	both	both	both
Tb427-100158000	2.61975	3.85605e-08	1.77265	4.90912e-09	both	both	both
Tb427-100156000	2.54809	7.88869e-16	1.77073	6.10308e-47	both	both	both
Tb427-110120100	1.87599	0.00778289	1.77045	4.88392e-10	both	both	both
Tb427-100028000	1.65544	6.30009e-05	1.77005	7.00632e-11	both	both	both
Tb427-100110100	1.97736	2.22001e-06	1.76985	2.10351e-11	both	both	both
Tb427-080030800	4.10947	7.85335e-18	1.76709	2.86125e-28	both	both	both
Tb427-100102600	2.94473	2.41105e-87	1.76709	1.07585e-37	both	both	both
Tb427-080042700	1.9279	1.51956e-06	1.76597	7.50732e-15	both	both	both
Tb427-110160900	2.89255	1.15901e-63	1.76483	1.71608e-39	both	both	both
Tb427-040028600	1.86101	7.3346e-05	1.76421	5.52708e-12	both	both	both
Tb427-070072400	1.90259	2.9844e-23	1.76328	1.03593e-41	both	both	both
Tb427-080057400	4.03724	5.24558e-05	1.76273	5.45693e-07	both	both	both
Tb427-090055700	2.5191	4.24481e-16	1.76262	7.20172e-13	both	both	both
Tb427-100031000	3.28973	2.79486e-32	1.76059	1.65285e-25	both	both	both
Tb427-110109500	2.54648	2.11832e-15	1.76038	1.90634e-23	both	both	both
Tb427-050038400	2.13156	0.000199654	1.75994	0.000681665	both	both	both
Tb427-070008200	2.33967	0.000366757	1.75614	0.000675077	both	both	both
Tb427-110030600	2.69018	1.29119e-16	1.7558	3.43049e-17	both	both	both
Tb427-090024800	2.7582	2.63874e-11	1.75483	4.81864e-10	both	both	both
Tb427-080031700	2.13199	1.12758e-07	1.75248	1.64741e-09	both	both	both
Tb427-060054700	1.87224	2.00079e-07	1.75096	2.86311e-15	both	both	both
Tb427-030018800	1.70818	0.00411558	1.74443	4.45002e-05	both	both	both
Tb427-100162000	1.94862	2.31986e-08	1.74412	1.7689e-19	both	both	both
Tb427-000277900	2.06711	0.00437687	1.7399	0.00274601	both	both	both
Tb427-080053800	3.13338	1.54932e-15	1.7387	4.54346e-23	both	both	both
Tb427-110103200	2.55356	1.32133e-06	1.73661	3.62033e-13	both	both	both
Tb427-100110000	3.00301	1.64842e-10	1.73636	5.06248e-12	both	both	both
Tb427-100140800	2.11927	7.47576e-10	1.73624	3.75665e-08	both	both	both
Tb427-100051600	2.4866	2.56826e-19	1.73556	1.01352e-29	both	both	both
Tb427-060037800	1.94538	0.000302852	1.7349	0.00102128	both	both	both
Tb427-070052900	3.88617	1.05459e-35	1.73485	2.03252e-22	both	both	both
Tb427-100063000	2.12285	5.52977e-07	1.73455	1.18169e-09	both	both	both
Tb427-050051400	2.12993	5.58685e-06	1.73403	4.92824e-07	both	both	both
Tb427-070020000	1.65161	0.00184942	1.73394	9.53116e-09	both	both	both
Tb427-070050500	2.34698	6.59329e-12	1.73273	6.8304e-29	both	both	both
Tb427-110120700	1.93954	1.5436e-16	1.73021	2.10987e-28	both	both	both
Tb427-040028900	2.20731	1.09005e-17	1.72769	9.86746e-27	both	both	both
Tb427-020008100	2.3795	7.16192e-35	1.72549	1.96322e-77	both	both	both
Tb427-110101800	3.01908	6.34443e-24	1.72535	8.01023e-32	both	both	both
Tb427-040046800:pseudogene	2.67943	4.18746e-09	1.72492	8.27205e-11	both	both	both
Tb427-080084600	2.19587	1.2348e-09	1.72466	1.07958e-09	both	both	both
Tb427-070050000	2.03884	2.68551e-13	1.72373	7.6277e-14	both	both	both
Tb427-020031400	3.03851	4.33605e-08	1.72215	9.39119e-11	both	both	both
Tb427-110119600	1.61156	0.000233236	1.71944	3.09932e-06	both	both	both
Tb427-110110600	2.62063	3.50085e-17	1.71907	4.49151e-15	both	both	both
Tb427-080013600	2.35005	0.000420881	1.71861	2.25576e-10	both	both	both
Tb427-080050800	2.81904	4.84155e-34	1.71854	1.12356e-37	both	both	both
Tb427-040018500	2.45525	2.63331e-06	1.71576	1.1528e-07	both	both	both
Tb427-090015100	1.88634	9.51909e-06	1.71207	4.77863e-10	both	both	both
Tb427-100108100	2.3885	1.04238e-18	1.7102	1.93612e-25	both	both	both
Tb427-040019100	2.51822	4.66817e-29	1.70986	1.5566e-20	both	both	both
Tb427-100122700	2.00654	1.28945e-05	1.70654	2.19182e-10	both	both	both
Tb427-090082600	1.63888	0.00429116	1.7061	4.36639e-10	both	both	both
Tb427-110120000	2.18654	0.0006053	1.70417	2.32288e-08	both	both	both
Tb427-050035000	3.23281	5.714e-110	1.70352	4.33729e-92	both	both	both
Tb427-110183300	2.09009	0.00989685	1.6973	5.92369e-05	both	both	both
Tb427-110141100	1.74279	0.000602146	1.6971	2.39759e-06	both	both	both
Tb427-080085800	2.23828	0.00328737	1.6968	0.000363524	both	both	both
Tb427-100125400	1.7041	0.00310253	1.69485	4.61816e-06	both	both	both
Tb427-100103800	5.11399	1.62454e-07	1.69424	3.29272e-06	both	both	both
Tb427-070079900	2.55461	0.00432189	1.69414	3.27477e-09	both	both	both
Tb427-110154400	1.70182	3.70156e-06	1.69373	5.51547e-12	both	both	both
Tb427-100048900	2.37068	3.91671e-09	1.69367	1.07512e-09	both	both	both
Tb427-050022700	2.77828	1.08544e-18	1.69302	4.04364e-23	both	both	both
Tb427-100074000	4.91066	1.23576e-53	1.69155	2.4182e-10	both	both	both
Tb427-080051400	3.03202	4.55981e-15	1.68975	1.42829e-22	both	both	both
Tb427-090083800	2.07017	1.83386e-08	1.68904	8.06255e-21	both	both	both
Tb427-080010200:pseudogene	2.07314	0.0019728	1.68642	0.000144143	both	both	both
Tb427-050026000	2.30212	0.000322052	1.68335	0.000697738	both	both	both
Tb427-100107500	1.89255	0.00569691	1.6818	0.000260565	both	both	both
Tb427-110010300	2.06301	1.16239e-05	1.6806	6.30861e-07	both	both	both
Tb427-070011000	1.96605	8.32313e-22	1.68054	3.42722e-40	both	both	both
Tb427-080083400	1.71417	0.000853718	1.68018	3.93583e-17	both	both	both
Tb427-050041900	2.04211	0.000572241	1.67828	4.13938e-09	both	both	both
Tb427-070044600	2.21869	7.40745e-09	1.67551	2.87997e-09	both	both	both
Tb427-030031800	1.663	0.00935846	1.67519	2.38251e-11	both	both	both
Tb427-100157000	2.3193	4.29733e-05	1.67252	1.80724e-05	both	both	both
Tb427-110071700	3.53601	4.27165e-07	1.67247	4.12628e-08	both	both	both
Tb427-040016600	3.2961	4.87104e-10	1.67174	1.33864e-07	both	both	both
Tb427-090082700	1.76753	2.13522e-18	1.67159	1.21323e-20	both	both	both
Tb427-110128400	1.87772	2.25831e-05	1.67091	6.78712e-09	both	both	both
Tb427-070076500	2.28691	0.00272738	1.66985	8.81511e-05	both	both	both
Tb427-070080100	2.68072	8.7053e-08	1.66935	7.54742e-10	both	both	both
Tb427-110051500	2.39489	0.00130195	1.66711	0.000140562	both	both	both
Tb427-070081200	2.75407	1.94841e-08	1.66687	2.72675e-18	both	both	both
Tb427-030033600	3.20566	2.88557e-35	1.66668	1.24627e-39	both	both	both
Tb427-110074100	2.484	1.17338e-07	1.66611	9.79587e-06	both	both	both
Tb427-100107600	3.57728	0.000253886	1.66496	6.85217e-09	both	both	both
Tb427-110032600	2.35309	2.73207e-06	1.66242	4.60459e-08	both	both	both
Tb427-020019900	2.19658	1.61422e-09	1.6623	3.01219e-09	both	both	both
Tb427-060037500	2.01294	0.000995481	1.66127	6.96441e-06	both	both	both
Tb427-110154600	1.80995	0.000149365	1.66118	1.71693e-05	both	both	both
Tb427-100054100	2.00691	9.67184e-09	1.66098	9.31168e-21	both	both	both
Tb427-090050800	2.44126	0.000347444	1.6606	0.00023745	both	both	both
Tb427-070059500	2.37388	0.00317214	1.65715	0.000315457	both	both	both
Tb427-080005700	1.95091	0.000114102	1.65689	7.46717e-15	both	both	both
Tb427-100137300	2.26103	3.04444e-05	1.65658	1.41282e-06	both	both	both
Tb427-110120300	2.70814	0.000359654	1.65631	1.08667e-05	both	both	both
Tb427-100110400	1.85341	0.00486319	1.65507	1.52646e-06	both	both	both
Tb427-080021900	2.95402	0.000105036	1.65416	1.05278e-06	both	both	both
Tb427-060014900	2.18901	0.00602108	1.65077	4.29191e-09	both	both	both
Tb427-020031300	2.27439	0.000178252	1.65036	2.06524e-11	both	both	both
Tb427-040032200	4.20232	4.4466e-05	1.64906	0.000512832	both	both	both
Tb427-110141900	1.58216	6.02852e-06	1.64884	2.90704e-10	both	both	both
Tb427-060023500	2.82211	1.05887e-08	1.64803	9.97078e-07	both	both	both
Tb427-050028900	1.97773	2.88938e-05	1.64754	3.39005e-13	both	both	both
Tb427-110109100	1.61676	0.00291336	1.6474	1.09239e-20	both	both	both
Tb427-050039600	2.8979	9.33477e-07	1.64658	2.29555e-07	both	both	both
Tb427-090049600	2.11157	0.00265014	1.64656	1.83805e-10	both	both	both
Tb427-050052200	2.90033	2.8859e-57	1.64645	2.17321e-35	both	both	both
Tb427-030007000	1.78033	0.000371251	1.64625	1.54375e-07	both	both	both
Tb427-040040200	1.89927	8.93703e-26	1.64623	8.87492e-61	both	both	both
Tb427-080034700	2.79242	0.00391008	1.64588	0.000289703	both	both	both
Tb427-090050700	1.93088	0.000378593	1.64546	1.03099e-06	both	both	both
Tb427-110127700	1.78571	4.43111e-10	1.64451	5.83148e-21	both	both	both
Tb427-050051800	2.33587	2.56571e-08	1.64435	4.99689e-05	both	both	both
Tb427-070076700	1.73652	1.27291e-28	1.64226	1.81369e-27	both	both	both
Tb427-070019900	2.89663	3.38599e-05	1.6422	3.06874e-06	both	both	both
Tb427-100058500	3.44256	2.47229e-09	1.64101	1.15468e-13	both	both	both
Tb427-100167100	1.88946	4.97771e-08	1.64066	8.97741e-12	both	both	both
Tb427-090058900	1.76483	3.73628e-06	1.64052	2.82575e-31	both	both	both
Tb427-110188600	2.3413	8.45281e-09	1.63888	5.17717e-08	both	both	both
Tb427-090020600	2.95287	6.31361e-18	1.63522	3.93149e-07	both	both	both
Tb427-110105300	6.76539	6.97251e-09	1.63493	0.00387869	both	both	both
Tb427-100062000	1.98393	9.59197e-05	1.63439	9.69065e-06	both	both	both
Tb427-070017300	1.85449	1.62454e-07	1.63299	1.7051e-11	both	both	both
Tb427-010007200	2.0281	4.40028e-06	1.63274	3.59922e-05	both	both	both
Tb427-100055500	2.4525	1.39777e-05	1.63135	4.02866e-08	both	both	both
Tb427-070024000	2.09197	1.54605e-08	1.63127	4.24821e-09	both	both	both
Tb427-080038700	3.80018	2.31768e-09	1.63093	7.49661e-05	both	both	both
Tb427-070027400	2.59962	2.46288e-05	1.62962	2.25166e-05	both	both	both
Tb427-070054300	1.69052	2.08646e-05	1.62956	1.76402e-11	both	both	both
Tb427-070054700	3.04732	2.39365e-81	1.62929	8.00013e-49	both	both	both
Tb427-030032600	2.33823	7.84647e-20	1.6275	6.05088e-32	both	both	both
Tb427-030037200	2.07226	0.00411154	1.62578	8.83742e-07	both	both	both
Tb427-100008000	2.766	0.0002038	1.62539	0.000704183	both	both	both
Tb427-040051300:pseudogene	1.81909	1.69376e-06	1.62514	0.000371372	both	both	both
Tb427-020017300	2.02723	0.00109436	1.62437	0.000131688	both	both	both
Tb427-110007100	1.98594	0.000582748	1.6236	0.000466214	both	both	both
Tb427-050022600	2.42161	2.3735e-13	1.61972	4.36863e-12	both	both	both
Tb427-010025200	1.69144	0.000904793	1.61942	2.99227e-05	both	both	both
Tb427-110135400	1.97457	5.42152e-09	1.61931	8.05766e-14	both	both	both
Tb427-100013700	2.37257	0.00537928	1.61777	0.000145638	both	both	both
Tb427-100143900	2.52901	1.74327e-05	1.61769	0.000268114	both	both	both
Tb427-110170700	2.21713	1.78735e-06	1.61717	1.24971e-12	both	both	both
Tb427-110043800	2.46667	0.00599702	1.61548	4.64894e-05	both	both	both
Tb427-100073200	2.54217	0.000211173	1.61433	4.76711e-05	both	both	both
Tb427-040010100	3.41896	0.000830495	1.61331	0.00535835	both	both	both
Tb427-040032400	2.36037	8.04307e-12	1.61316	1.45569e-07	both	both	both
Tb427-100132500	1.72918	0.00438768	1.61204	0.000131167	both	both	both
Tb427-080080000	2.38901	7.51714e-09	1.61164	0.000139621	both	both	both
Tb427-030058600	1.58307	0.00202632	1.61099	9.34169e-09	both	both	both
Tb427-060043200	1.90995	9.63771e-06	1.61087	1.63274e-07	both	both	both
Tb427-040052400	1.965	2.44929e-12	1.60972	4.03515e-24	both	both	both
Tb427-100078300	1.90126	4.59118e-30	1.60922	2.8692e-37	both	both	both
Tb427-080013000	4.33707	7.38769e-14	1.60897	9.64044e-05	both	both	both
Tb427-090045500	1.65626	0.00764484	1.60838	5.30847e-18	both	both	both
Tb427-100119600	2.47018	4.13766e-14	1.60828	1.75316e-22	both	both	both
Tb427-080019700	2.0258	6.75465e-05	1.60589	3.41304e-05	both	both	both
Tb427-100109600	1.51184	0.00607947	1.6049	1.15686e-11	both	both	both
Tb427-040024600	1.59709	8.52539e-06	1.60455	5.72119e-17	both	both	both
Tb427-100059200	2.22774	3.28428e-17	1.60164	1.15781e-06	both	both	both
Tb427-090014600	2.36847	0.000855135	1.6015	6.29108e-09	both	both	both
Tb427-070062500	2.86565	0.00475752	1.60118	2.67094e-05	both	both	both
Tb427-040012800	2.11123	0.000264021	1.6011	5.45435e-06	both	both	both
Tb427-070041100	1.65023	0.00277921	1.60109	5.5014e-07	both	both	both
Tb427-100138600	2.14189	0.00727223	1.60094	0.000697172	both	both	both
Tb427-030059300	1.78054	0.000947753	1.60045	1.38256e-14	both	both	both
Tb427-070042400	1.68753	2.81046e-09	1.60036	5.20745e-18	both	both	both
Tb427-010013900	2.18461	3.36372e-06	1.60006	1.38583e-10	both	both	both
Tb427-040023200	2.66121	7.55716e-34	1.59807	1.84036e-57	both	both	both
Tb427-100103900:pseudogene	2.21855	7.60587e-07	1.59725	3.77301e-06	both	both	both
Tb427-090070300	1.89295	8.49717e-10	1.59467	3.12991e-11	both	both	both
Tb427-040043300	2.17358	2.1865e-07	1.59378	7.74898e-06	both	both	both
Tb427-100067900	2.31793	4.55428e-08	1.59319	2.41911e-09	both	both	both
Tb427-070058100	2.18203	0.00168799	1.59236	1.37217e-06	both	both	both
Tb427-030027800	2.39555	0.000181985	1.59119	0.000250334	both	both	both
Tb427-110076700	2.16286	2.5377e-08	1.59052	0.000145082	both	both	both
Tb427-050029600	2.64191	9.87375e-05	1.59051	1.69553e-07	both	both	both
Tb427-060036300	3.44804	9.50895e-10	1.5895	0.00858555	both	both	both
Tb427-110165200	2.10047	2.23812e-08	1.58838	8.21457e-09	both	both	both
Tb427-020017200	2.03863	0.00182318	1.58761	1.80769e-05	both	both	both
Tb427-110082600	3.03262	5.22041e-15	1.5876	3.25654e-18	both	both	both
Tb427-100085400	2.05168	1.01302e-25	1.58715	3.93583e-17	both	both	both
Tb427-010028600	2.33258	0.00172086	1.58634	1.12911e-07	both	both	both
Tb427-100023000	1.77907	1.78241e-06	1.58412	9.9004e-10	both	both	both
Tb427-070010700	2.41556	6.08965e-05	1.58347	2.85767e-06	both	both	both
Tb427-030045700	2.36051	4.63292e-06	1.58318	9.05372e-11	both	both	both
Tb427-100133500:pseudogene	3.21486	1.61864e-05	1.58159	3.77346e-06	both	both	both
Tb427-110099200	1.79767	4.51494e-05	1.58151	3.58859e-06	both	both	both
Tb427-110109800	2.25181	1.3526e-12	1.58103	5.71189e-19	both	both	both
Tb427-090036300	1.77372	0.000372104	1.58071	3.83764e-08	both	both	both
Tb427-040013400	1.68365	0.000490528	1.57905	2.36168e-07	both	both	both
Tb427-110073800	1.72963	1.43817e-23	1.57827	5.86698e-59	both	both	both
Tb427-110054800	2.18412	0.00463032	1.57776	0.000712096	both	both	both
Tb427-030030100	1.98284	2.58451e-09	1.57535	3.30464e-06	both	both	both
Tb427-090062400	1.91913	0.000331517	1.57474	2.06948e-06	both	both	both
Tb427-110176400	2.50932	0.000285767	1.5746	0.00558663	both	both	both
Tb427-100138200	2.52393	3.11488e-10	1.57317	2.25081e-12	both	both	both
Tb427-100070700	1.67443	3.45483e-05	1.57197	5.29659e-14	both	both	both
Tb427-110015700	2.57326	5.70203e-40	1.5711	3.10077e-39	both	both	both
Tb427-090034200	2.6257	2.01463e-13	1.56889	8.726e-08	both	both	both
Tb427-110040100	2.04704	3.58924e-11	1.56813	3.06802e-10	both	both	both
Tb427-100063400	2.7387	0.000136184	1.56739	1.19351e-07	both	both	both
Tb427-090037700	1.59934	0.00350423	1.56676	0.000423645	both	both	both
Tb427-030054100	1.83554	1.56328e-19	1.56628	4.47081e-11	both	both	both
Tb427-040021200	2.32059	1.66175e-10	1.56626	3.5288e-09	both	both	both
Tb427-070018600	2.90877	3.21832e-10	1.56588	1.51517e-08	both	both	both
Tb427-100171500	2.20475	0.000540851	1.56529	0.000347221	both	both	both
Tb427-060055300	1.60241	0.00714642	1.56527	4.73554e-06	both	both	both
Tb427-000272800:pseudogene	2.67059	0.000502921	1.56362	0.00556923	both	both	both
Tb427-110049900	2.49237	3.00194e-29	1.56351	1.79495e-26	both	both	both
Tb427-030006600	1.98473	7.22749e-05	1.56152	7.16725e-10	both	both	both
Tb427-110189700	1.9061	9.41698e-06	1.56113	2.77102e-05	both	both	both
Tb427-100117000	2.12286	5.97818e-12	1.56071	1.04628e-12	both	both	both
Tb427-030042500	1.57874	0.00311644	1.5599	8.90887e-11	both	both	both
Tb427-100032500	1.83597	1.14661e-19	1.55977	1.29847e-30	both	both	both
Tb427-080042000:pseudogene	1.80107	0.000891486	1.55943	1.12159e-05	both	both	both
Tb427-080066600	1.99572	4.50967e-09	1.55718	1.41239e-11	both	both	both
Tb427-100094600	1.67323	1.98726e-06	1.55648	1.41282e-06	both	both	both
Tb427-090009000	2.4214	6.34768e-18	1.55648	5.65216e-15	both	both	both
Tb427-070081300	3.60306	3.88427e-06	1.55492	0.000154017	both	both	both
Tb427-020006600	2.22505	2.06917e-07	1.55427	4.1924e-09	both	both	both
Tb427-100153500	2.48871	2.46482e-14	1.55334	2.49793e-14	both	both	both
Tb427-010029100	2.45975	6.23998e-95	1.55225	1.4326e-67	both	both	both
Tb427-080041800	2.902	1.42746e-05	1.55097	2.14762e-11	both	both	both
Tb427-070045600	2.1792	2.65171e-07	1.55093	1.28477e-09	both	both	both
Tb427-080061100	1.60063	0.00109385	1.55059	7.32678e-09	both	both	both
Tb427-110166500	2.5743	8.8095e-06	1.54808	0.00118422	both	both	both
Tb427-060036500	2.33755	0.00317927	1.54799	0.000705889	both	both	both
Tb427-040023900	1.95564	0.00377991	1.54722	0.00227277	both	both	both
Tb427-080049400	1.86223	5.21312e-08	1.54542	1.1705e-09	both	both	both
Tb427-090058400	1.51611	3.14702e-14	1.54519	3.21652e-68	both	both	both
Tb427-100079400	1.54543	0.00029041	1.54512	6.44831e-07	both	both	both
Tb427-100162600	4.19804	4.03248e-17	1.54463	1.56725e-13	both	both	both
Tb427-110105000	2.87413	5.57841e-06	1.54266	0.00217588	both	both	both
Tb427-080033500	1.92667	0.000692415	1.54168	9.70008e-06	both	both	both
Tb427-010020400	1.77289	0.00265014	1.53982	2.883e-05	both	both	both
Tb427-090054000	2.22968	3.3341e-05	1.53871	1.11537e-05	both	both	both
Tb427-060036100	1.74603	0.00339525	1.53835	4.72964e-07	both	both	both
Tb427-040025600	1.79218	1.55737e-05	1.53825	2.03448e-16	both	both	both
Tb427-100034100	1.75549	5.00915e-16	1.53819	2.80735e-09	both	both	both
Tb427-020013000	1.79773	0.000784617	1.53766	2.67894e-09	both	both	both
Tb427-010010700	1.91509	7.48369e-08	1.5373	2.55933e-16	both	both	both
Tb427-090023500	2.44974	1.00937e-11	1.53655	1.06048e-08	both	both	both
Tb427-100033100:pseudogene	1.65666	0.00727735	1.53335	9.81788e-08	both	both	both
Tb427-090050200	1.82129	8.45178e-09	1.53267	2.38735e-06	both	both	both
Tb427-060008400	1.8587	5.40744e-05	1.5325	2.1785e-39	both	both	both
Tb427-100042800	1.94333	2.95335e-05	1.53228	5.167e-06	both	both	both
Tb427-110022100	1.91327	1.66521e-10	1.53007	6.49367e-15	both	both	both
Tb427-010024300	2.36543	5.465e-07	1.52987	1.2145e-08	both	both	both
Tb427-020017500	1.81426	0.00219045	1.5289	2.78676e-17	both	both	both
Tb427-110064300	1.87284	0.00339784	1.52871	0.00562497	both	both	both
Tb427-060017700	1.96635	0.00297568	1.5277	0.00244512	both	both	both
Tb427-090017300	1.71822	0.00337557	1.52761	0.00498048	both	both	both
Tb427-110156200	2.02207	7.86781e-06	1.52722	1.04943e-07	both	both	both
Tb427-030039700	3.50509	6.0278e-36	1.52643	1.06963e-40	both	both	both
Tb427-070009900	1.53172	0.0057548	1.52588	1.60226e-08	both	both	both
Tb427-110033800	2.06155	0.00121477	1.52585	5.77979e-07	both	both	both
Tb427-040053400	2.90244	1.57316e-10	1.52551	4.14778e-06	both	both	both
Tb427-100029200	1.57314	0.000102116	1.52541	8.36797e-09	both	both	both
Tb427-100131700	2.06219	0.000190934	1.52535	1.0493e-06	both	both	both
Tb427-100012800	2.97961	3.49338e-17	1.52531	8.37575e-10	both	both	both
Tb427-040055200	1.83647	0.00666822	1.5253	0.00314982	both	both	both
Tb427-030053600	1.67064	4.39243e-09	1.52527	1.64145e-10	both	both	both
Tb427-080068000	1.71521	4.63763e-10	1.52446	2.49112e-15	both	both	both
Tb427-040048400	2.16862	4.07413e-15	1.52409	4.28694e-13	both	both	both
Tb427-070042800	2.18549	1.89475e-13	1.5219	2.05598e-17	both	both	both
Tb427-010016500:pseudogene	2.93156	5.3884e-06	1.52076	0.000460719	both	both	both
Tb427-080029800	1.90236	6.8086e-07	1.5207	6.19804e-05	both	both	both
Tb427-110065500	1.77032	3.89417e-07	1.52058	8.18158e-09	both	both	both
Tb427-060009600	2.3692	1.74514e-22	1.51965	2.3874e-19	both	both	both
Tb427-090046700	2.29431	4.67349e-17	1.51833	2.97786e-16	both	both	both
Tb427-110042200	2.45908	6.48856e-12	1.51803	6.17053e-11	both	both	both
Tb427-100147400	1.81248	0.000338887	1.51724	1.8714e-06	both	both	both
Tb427-050031400	1.58806	4.70572e-05	1.51674	8.21945e-09	both	both	both
Tb427-040008600	2.04157	0.000150897	1.51662	0.000302218	both	both	both
Tb427-100152800	2.25661	0.00535476	1.51495	0.00904498	both	both	both
Tb427-090048600	2.82305	7.59832e-26	1.51442	6.96186e-14	both	both	both
Tb427-080057000:pseudogene	1.83752	0.00119823	1.51357	8.0747e-05	both	both	both
Tb427-110170400	2.19342	3.81011e-10	1.51259	1.68275e-12	both	both	both
Tb427-060020800:pseudogene	1.66863	5.31056e-10	1.51205	6.91796e-17	both	both	both
Tb427-070030100	1.93706	0.00189355	1.51171	1.50425e-05	both	both	both
Tb427-110142200	1.64599	3.15365e-06	1.50712	5.18743e-12	both	both	both
Tb427-110176000	2.62506	9.21198e-07	1.50602	4.00573e-09	both	both	both
Tb427-110042400	2.32789	2.05577e-11	1.50583	2.63033e-08	both	both	both
Tb427-060024700	1.82807	0.000625863	1.50571	0.000188502	both	both	both
Tb427-070032400	2.44895	1.24829e-10	1.50505	6.69922e-10	both	both	both
Tb427-090045700	1.80923	2.66847e-05	1.50417	6.51336e-08	both	both	both
Tb427-060050300	3.2014	2.61375e-18	1.5041	2.55271e-16	both	both	both
Tb427-090034500	2.43336	7.68162e-112	1.50352	5.31215e-189	both	both	both
Tb427-070068500	2.02214	1.43877e-05	1.50191	3.6644e-06	both	both	both
Tb427-040022400	2.04925	0.00594723	1.50183	3.14473e-06	both	both	both
Tb427-100133700	3.19481	0.00217702	1.50078	0.0021349	both	both	both
Tb427-020027400	1.53912	1.59255e-06	1.50019	1.56853e-18	both	both	both
Tb427-100155600	2.17724	2.6745e-11	1.49976	2.73158e-19	BSF	both	both
Tb427-090018600	2.61748	2.78414e-35	1.49976	2.0229e-27	BSF	both	both
Tb427-110124200	1.75476	4.63292e-06	1.49847	2.09858e-08	BSF	both	both
Tb427-090028800	1.73896	9.33986e-13	1.49789	1.86154e-20	BSF	both	both
Tb427-090051000	1.82191	1.88472e-11	1.49632	2.12184e-13	BSF	both	both
Tb427-020032200	1.82718	0.00111489	1.49502	0.000212817	BSF	both	both
Tb427-080050900	1.90161	0.000128808	1.49499	1.44929e-10	BSF	both	both
Tb427-030054700	1.94591	0.00121009	1.49479	0.00130956	BSF	both	both
Tb427-110145700	2.01142	0.000463579	1.49457	1.50884e-13	BSF	both	both
Tb427-100150000	2.05387	0.00184122	1.49414	1.98389e-08	BSF	both	both
Tb427-110069600	2.37412	4.50792e-21	1.49336	2.54747e-11	BSF	both	both
Tb427-050018300	1.99184	0.000147456	1.49311	0.000335234	BSF	both	both
Tb427-070056500	3.99146	8.13725e-07	1.49302	1.07607e-06	BSF	both	both
Tb427-040006000	2.4944	1.47857e-05	1.49042	3.19923e-06	BSF	both	both
Tb427-030011600	2.13035	4.65131e-07	1.49035	1.20129e-09	BSF	both	both
Tb427-090008400	1.6492	9.66158e-10	1.48974	9.4813e-18	BSF	both	both
Tb427-030034000	1.61274	0.00786257	1.48905	3.81641e-06	BSF	both	both
Tb427-100057900	1.51275	0.00993598	1.48839	7.89931e-07	BSF	both	both
Tb427-110170500	5.42927	4.27547e-06	1.48712	0.00334702	BSF	both	both
Tb427-050044300	2.59073	4.89137e-05	1.48706	0.00957183	BSF	both	both
Tb427-100065300	2.44525	1.02448e-05	1.48702	0.00222191	BSF	both	both
Tb427-070057100	2.07155	0.00175008	1.48682	0.000108683	BSF	both	both
Tb427-110118900	2.28656	0.000476974	1.48679	0.00269694	BSF	both	both
Tb427-100131500	2.38158	2.20957e-06	1.48543	0.000734194	BSF	both	both
Tb427-050010200	2.8696	0.000920322	1.48531	9.07158e-08	BSF	both	both
Tb427-080085400	2.38969	8.55851e-36	1.48523	0.00249625	BSF	both	both
Tb427-010005600	3.70489	3.06379e-05	1.48445	1.7179e-06	BSF	both	both
Tb427-100158500	2.42976	1.55571e-07	1.48417	5.96187e-05	BSF	both	both
Tb427-040010600	1.6749	0.000394469	1.48187	1.03613e-07	BSF	both	both
Tb427-100022900	1.8589	6.04825e-05	1.481	5.16674e-07	BSF	both	both
Tb427-020011800	2.35161	2.58886e-62	1.47885	4.12189e-13	BSF	both	both
Tb427-100075200	3.45617	2.11439e-11	1.47867	5.96851e-08	BSF	both	both
Tb427-020023400	1.84712	1.31629e-08	1.47757	2.79474e-13	BSF	both	both
Tb427-060024100	2.13257	1.05333e-05	1.47756	0.00311955	BSF	both	both
Tb427-050030800	1.92681	0.00019653	1.47685	4.50493e-05	BSF	both	both
Tb427-110179800	1.51458	4.94215e-05	1.47677	3.1598e-12	BSF	both	both
Tb427-110024700	2.27493	0.000255279	1.47669	0.000198179	BSF	both	both
Tb427-100147800	2.19015	4.28634e-10	1.47611	1.89346e-11	BSF	both	both
Tb427-060048900	1.65382	4.01317e-05	1.47607	8.39374e-09	BSF	both	both
Tb427-080063700	2.30565	2.73098e-06	1.4759	7.3154e-06	BSF	both	both
Tb427-100117900	1.9119	3.89223e-18	1.47577	5.47258e-33	BSF	both	both
Tb427-100041100	1.56154	0.000217086	1.4751	2.99068e-09	BSF	both	both
Tb427-020027200	2.41232	0.000408325	1.47472	0.000364323	BSF	both	both
Tb427-110035700	2.06596	0.0077901	1.47462	5.76436e-08	BSF	both	both
Tb427-020030300	2.56013	6.87481e-08	1.47418	1.47979e-05	BSF	both	both
Tb427-070056200	1.83565	3.35293e-09	1.47316	8.33398e-09	BSF	both	both
Tb427-100153400	1.56897	0.00457758	1.47224	2.74755e-06	BSF	both	both
Tb427-110118800	1.93812	1.33669e-07	1.47219	0.000801814	BSF	both	both
Tb427-110034700	2.08219	0.0040664	1.47176	9.44748e-05	BSF	both	both
Tb427-050025300	1.66943	5.02727e-06	1.47171	2.43033e-07	BSF	both	both
Tb427-110110700	2.23674	2.31518e-08	1.47132	1.11121e-07	BSF	both	both
Tb427-110188200	1.83369	0.00653425	1.47081	0.00141502	BSF	both	both
Tb427-040030600	3.07298	1.60323e-06	1.47057	0.000468784	BSF	both	both
Tb427-080045300	1.72582	0.00411558	1.46999	2.04804e-14	BSF	both	both
Tb427-070039700	2.46437	0.000903332	1.46975	3.5319e-11	BSF	both	both
Tb427-080009000	1.51265	0.00592739	1.469	2.32426e-07	BSF	both	both
Tb427-110053900	1.97274	2.62286e-07	1.46823	5.6336e-08	BSF	both	both
Tb427-080020700	2.13049	3.85341e-30	1.46716	7.671e-76	BSF	both	both
Tb427-080055500	2.18934	1.7114e-08	1.46696	0.000135167	BSF	both	both
Tb427-020012900	1.88318	0.00521527	1.46674	0.0016234	BSF	both	both
Tb427-100050400	4.11278	1.81048e-15	1.46502	0.000137656	BSF	both	both
Tb427-080029500	2.46753	4.00268e-22	1.4642	5.2526e-36	BSF	both	both
Tb427-080017400	1.91241	0.00602044	1.46372	0.000195832	BSF	both	both
Tb427-100009400	1.88804	1.18821e-05	1.46266	2.99944e-06	BSF	both	both
Tb427-030020400	1.94197	0.000263211	1.4618	0.000503783	BSF	both	both
Tb427-010016400	1.69838	0.00515598	1.46138	0.000219722	BSF	both	both
Tb427-100036700	2.48333	0.00139176	1.46091	0.00810449	BSF	both	both
Tb427-040031100	2.13378	3.84419e-06	1.46064	0.00047396	BSF	both	both
Tb427-080075000	1.75744	0.000382068	1.46023	0.00229769	BSF	both	both
Tb427-080006700	1.87123	3.95011e-11	1.4596	1.03901e-11	BSF	both	both
Tb427-040029800	2.01904	2.04402e-103	1.4586	7.3865e-161	BSF	both	both
Tb427-100133800	2.59222	0.000175076	1.4582	0.00169524	BSF	both	both
Tb427-060017900	1.8125	0.00075043	1.45526	4.13281e-08	BSF	both	both
Tb427-110017700	2.37254	0.000201285	1.45405	0.00042561	BSF	both	both
Tb427-100026700	2.18896	1.85556e-11	1.45401	1.3455e-20	BSF	both	both
Tb427-060043100	1.77582	0.000687729	1.45193	0.000307069	BSF	both	both
Tb427-100040700	1.67028	0.00375391	1.45028	0.00533583	BSF	both	both
Tb427-010015200	2.4529	0.000172839	1.44909	3.50956e-05	BSF	both	both
Tb427-060041600	1.80289	0.00214008	1.44775	5.7352e-05	BSF	both	both
Tb427-090030400	1.94267	3.89669e-05	1.44716	3.99222e-08	BSF	both	both
Tb427-110005500	2.30012	4.53578e-21	1.44692	9.43047e-24	BSF	both	both
Tb427-110057600	1.94113	0.00221257	1.4464	0.000398592	BSF	both	both
Tb427-070031100	2.31435	7.89305e-20	1.44627	8.86224e-10	BSF	both	both
Tb427-080010700	1.99523	4.75787e-07	1.44353	6.68443e-08	BSF	both	both
Tb427-100101500	1.54357	2.84028e-08	1.44346	1.01094e-16	BSF	both	both
Tb427-080059800	2.05084	0.00957191	1.44331	0.000438633	BSF	both	both
Tb427-040039800	1.94203	0.00159774	1.44324	0.000317945	BSF	both	both
Tb427-030059700	1.73688	0.00112149	1.44323	5.63199e-09	BSF	both	both
Tb427-110150100	1.97862	1.12712e-51	1.44291	3.52143e-34	BSF	both	both
Tb427-110044300	1.93424	2.85665e-07	1.44249	9.24819e-07	BSF	both	both
Tb427-070063800	1.57636	0.00474646	1.44223	0.000207356	BSF	both	both
Tb427-100103000	3.57293	1.97821e-12	1.44121	3.35833e-08	BSF	both	both
Tb427-100086800	1.66639	7.20437e-05	1.44106	4.94154e-06	BSF	both	both
Tb427-110162400	2.08533	7.62797e-05	1.44104	0.00347147	BSF	both	both
Tb427-110032900	3.93804	5.3605e-08	1.43784	0.00749195	BSF	both	both
Tb427-110026300	2.13281	3.56418e-16	1.4378	1.79055e-13	BSF	both	both
Tb427-020025300	2.19003	0.00145737	1.43775	1.68783e-07	BSF	both	both
Tb427-110042800	3.0433	6.63126e-19	1.43764	5.80637e-26	BSF	both	both
Tb427-100053300	1.8049	0.00251212	1.43717	5.62766e-05	BSF	both	both
Tb427-080040600	2.63367	3.65853e-17	1.43648	3.28712e-06	BSF	both	both
Tb427-050039400	2.4651	3.84937e-12	1.43573	0.0001728	BSF	both	both
Tb427-100063800:pseudogene	1.96049	0.00152457	1.43548	0.000291466	BSF	both	both
Tb427-080006400	2.30856	3.50213e-05	1.43513	0.00117486	BSF	both	both
Tb427-080040800	2.30903	3.00033e-14	1.43402	4.41203e-07	BSF	both	both
Tb427-070026100	1.68131	2.40166e-08	1.43371	4.66583e-10	BSF	both	both
Tb427-080028000	2.07229	5.2818e-06	1.43359	0.000753597	BSF	both	both
Tb427-110127300	2.69862	0.000400085	1.4334	2.76052e-12	BSF	both	both
Tb427-110107000	1.79506	1.21325e-27	1.43332	7.85879e-50	BSF	both	both
Tb427-100013900	1.71795	4.91622e-11	1.43319	2.46609e-23	BSF	both	both
Tb427-030034600	1.63759	0.0046487	1.43313	0.00343217	BSF	both	both
Tb427-110142300	1.65053	2.62677e-05	1.43233	7.43024e-07	BSF	both	both
Tb427-080022000	2.61402	7.96476e-07	1.43229	2.95413e-07	BSF	both	both
Tb427-100095100	3.30007	7.4872e-114	1.4322	9.28822e-14	BSF	both	both
Tb427-090026400	1.72232	0.00463032	1.43133	0.00110326	BSF	both	both
Tb427-100139500	4.03595	5.40639e-06	1.43125	0.000295296	BSF	both	both
Tb427-080017900	1.70738	0.000858896	1.43097	3.60313e-07	BSF	both	both
Tb427-060017400	1.55301	0.00905702	1.4303	0.000460719	BSF	both	both
Tb427-020018600	1.55087	4.55085e-07	1.42977	6.18482e-08	BSF	both	both
Tb427-100151700	2.11453	8.72156e-05	1.42974	0.00414051	BSF	both	both
Tb427-110078100	3.07621	5.48166e-15	1.42831	1.47904e-10	BSF	both	both
Tb427-070051500	2.77222	5.50179e-06	1.42807	4.35081e-05	BSF	both	both
Tb427-090018900	3.86003	3.35188e-07	1.42794	0.00258856	BSF	both	both
Tb427-050006200	2.03685	0.00624204	1.42721	0.00132108	BSF	both	both
Tb427-040044600	1.60621	0.00826476	1.42693	0.0028388	BSF	both	both
Tb427-090083600	1.82125	0.00426367	1.42636	6.73825e-05	BSF	both	both
Tb427-030049700	1.97633	2.83567e-06	1.42607	0.00946138	BSF	both	both
Tb427-100017000	1.69862	1.18691e-11	1.42532	7.53946e-14	BSF	both	both
Tb427-070022000	2.04392	0.000266824	1.4242	0.0062949	BSF	both	both
Tb427-050025100	2.09827	7.63267e-10	1.4235	0.00673786	BSF	both	both
Tb427-100041600	2.3063	0.000738519	1.42335	0.00639663	BSF	both	both
Tb427-080084800	2.24862	9.09904e-17	1.42277	4.05228e-07	BSF	both	both
Tb427-030030900	1.80322	0.00164642	1.42214	1.06583e-07	BSF	both	both
Tb427-100038000	1.64023	0.00180073	1.42073	8.87773e-05	BSF	both	both
Tb427-100113200	2.05559	0.000174038	1.42051	1.36131e-06	BSF	both	both
Tb427-110079500	1.79534	3.1543e-08	1.41881	4.56843e-05	BSF	both	both
Tb427-100109300	2.58974	2.42996e-11	1.41873	1.10155e-87	BSF	both	both
Tb427-110073000	1.53085	0.00982258	1.41864	9.0214e-06	BSF	both	both
Tb427-080024700	1.89126	0.000467995	1.41819	6.74766e-07	BSF	both	both
Tb427-110065700	1.84386	0.00531776	1.41627	0.00106316	BSF	both	both
Tb427-020009500	2.0348	0.00194321	1.41607	0.000899639	BSF	both	both
Tb427-090080300	1.62836	6.93683e-11	1.41594	7.05876e-06	BSF	both	both
Tb427-110058800	3.0121	8.79292e-23	1.41579	0.00935725	BSF	both	both
Tb427-100062700	2.33813	0.00385005	1.41534	0.00307364	BSF	both	both
Tb427-110014900	1.60007	9.56961e-07	1.41482	2.4928e-29	BSF	both	both
Tb427-110044600	1.73804	0.00056006	1.41481	0.000585516	BSF	both	both
Tb427-030015300	1.63239	2.49409e-05	1.41459	2.88653e-06	BSF	both	both
Tb427-100131200	1.61826	3.83676e-05	1.41404	9.95535e-06	BSF	both	both
Tb427-060040600	1.82698	0.00227776	1.41393	0.00218787	BSF	both	both
Tb427-090071500	1.57695	0.0017784	1.41329	0.00301831	BSF	both	both
Tb427-080049500	1.89897	3.4286e-08	1.41273	6.32585e-09	BSF	both	both
Tb427-090083900	1.58621	0.00912225	1.4114	0.00770666	BSF	both	both
Tb427-110158600	1.88801	4.27742e-19	1.41127	1.00627e-11	BSF	both	both
Tb427-070037500	1.69123	0.000964046	1.4101	0.000427098	BSF	both	both
Tb427-090015000	1.62266	0.000147547	1.40673	1.33107e-07	BSF	both	both
Tb427-070082300	2.38745	1.01654e-06	1.40662	1.16556e-14	BSF	both	both
Tb427-090087700	1.95638	7.63598e-05	1.40637	2.00105e-05	BSF	both	both
Tb427-110068600	2.28254	0.00277718	1.40521	0.00307756	BSF	both	both
Tb427-100047200	2.07899	0.0052315	1.40501	0.000632995	BSF	both	both
Tb427-060011800	2.02462	4.42152e-06	1.40438	0.000360205	BSF	both	both
Tb427-030015800	2.66099	0.00111584	1.40308	0.0074	BSF	both	both
Tb427-100010700	1.94256	0.000175193	1.40305	1.14207e-05	BSF	both	both
Tb427-110036400	1.53235	0.000508236	1.40244	1.92282e-08	BSF	both	both
Tb427-110045500	1.73591	1.27266e-05	1.40131	1.13623e-07	BSF	both	both
Tb427-110074900	1.51015	0.00185345	1.40109	1.54862e-06	BSF	both	both
Tb427-100152500	1.97591	0.00213903	1.40088	0.000133662	BSF	both	both
Tb427-050037500	1.98316	1.68397e-05	1.40023	9.48481e-06	BSF	both	both
Tb427-020021300	2.06337	1.73929e-09	1.39784	1.47274e-08	BSF	both	both
Tb427-060052300	1.78825	0.000223785	1.39432	0.00117178	BSF	both	both
Tb427-110016800	1.71385	1.54182e-11	1.39423	0.0047559	BSF	both	both
Tb427-100122300	2.23958	0.00887342	1.39381	0.00451051	BSF	both	both
Tb427-010027700	1.82472	1.70369e-17	1.39346	2.63426e-21	BSF	both	both
Tb427-060023700	1.97036	7.55181e-07	1.39179	7.22135e-05	BSF	both	both
Tb427-100103100	1.77503	0.000475928	1.39125	2.51021e-06	BSF	both	both
Tb427-030037800	2.64208	5.74793e-10	1.39061	2.42902e-09	BSF	both	both
Tb427-080072700	1.5922	0.00416066	1.38987	0.000164595	BSF	both	both
Tb427-110015400	1.50319	0.000135625	1.38869	1.73779e-45	BSF	both	both
Tb427-110048700	1.54145	0.000374395	1.38812	0.000983517	BSF	both	both
Tb427-070077300	1.51416	0.000206248	1.38798	1.11121e-07	BSF	both	both
Tb427-040007800	2.01449	1.36652e-05	1.38785	5.62141e-09	BSF	both	both
Tb427-080007500	2.49306	2.04171e-44	1.3871	1.91201e-123	BSF	both	both
Tb427-090025900	1.93851	1.44605e-05	1.38709	0.000669772	BSF	both	both
Tb427-040022300	2.63986	7.72691e-19	1.38661	2.67051e-15	BSF	both	both
Tb427-100154000	1.87105	3.7716e-06	1.38647	0.0014237	BSF	both	both
Tb427-010020100	1.75739	2.59099e-08	1.38628	4.49443e-08	BSF	both	both
Tb427-100051000	1.64448	0.000824617	1.38606	5.44537e-05	BSF	both	both
Tb427-010026900	1.52288	2.08646e-05	1.38488	2.75706e-13	BSF	both	both
Tb427-100037000	1.6736	5.57362e-06	1.38433	7.07036e-17	BSF	both	both
Tb427-020029800	3.4162	0.00905388	1.38426	8.22655e-12	BSF	both	both
Tb427-100055900	1.70862	3.4439e-05	1.38377	0.000478588	BSF	both	both
Tb427-070025400	1.6975	0.00179494	1.3835	0.000599384	BSF	both	both
Tb427-110099000	2.17662	2.46937e-07	1.38299	7.78254e-06	BSF	both	both
Tb427-010023300	1.74988	6.96899e-05	1.38198	3.62037e-06	BSF	both	both
Tb427-030039000	2.51006	1.03646e-07	1.38126	0.00103351	BSF	both	both
Tb427-060043400	1.83246	1.6451e-33	1.38109	4.3882e-65	BSF	both	both
Tb427-080008300	1.58766	1.48036e-06	1.3801	6.29398e-08	BSF	both	both
Tb427-020009100	1.76343	3.63208e-05	1.37976	1.44127e-05	BSF	both	both
Tb427-100084700	1.52038	7.48729e-06	1.37908	1.54399e-09	BSF	both	both
Tb427-060021100	1.82987	0.0029279	1.37882	0.00110001	BSF	both	both
Tb427-100067800	1.86699	0.00120574	1.37879	0.00223222	BSF	both	both
Tb427-110179400	3.12897	6.83072e-09	1.37868	7.07412e-05	BSF	both	both
Tb427-110089100	1.55569	0.000383128	1.37768	5.02913e-08	BSF	both	both
Tb427-110184300	2.10295	9.27609e-18	1.37737	8.16623e-19	BSF	both	both
Tb427-100165700	1.57495	2.31204e-10	1.37715	5.6354e-15	BSF	both	both
Tb427-110109700	2.58883	3.60089e-06	1.37658	2.76282e-05	BSF	both	both
Tb427-090028900	1.78885	3.18072e-14	1.37623	2.83472e-05	BSF	both	both
Tb427-100096000	1.70215	0.000356727	1.3748	0.000374166	BSF	both	both
Tb427-090062500	3.93577	1.1086e-05	1.37365	0.00226732	BSF	both	both
Tb427-110162200	1.74066	0.000149137	1.37256	7.22043e-05	BSF	both	both
Tb427-110161800	2.44411	0.000508236	1.37215	0.000177099	BSF	both	both
Tb427-110128100	1.57026	0.00393648	1.3718	0.00106602	BSF	both	both
Tb427-100132400	1.70882	0.0026281	1.3717	1.18698e-32	BSF	both	both
Tb427-070047000	1.92008	3.2052e-16	1.37134	1.26892e-11	BSF	both	both
Tb427-110145400	1.53995	5.31032e-05	1.37079	7.86526e-05	BSF	both	both
Tb427-090014500	1.60815	2.84236e-05	1.36994	0.00274389	BSF	both	both
Tb427-100066500	1.65009	0.000722718	1.36972	0.00509942	BSF	both	both
Tb427-110183200	1.52198	7.37181e-06	1.36926	4.98589e-05	BSF	both	both
Tb427-110158200	1.9038	0.00308145	1.36739	0.00525856	BSF	both	both
Tb427-090075700	2.06992	0.00672025	1.36697	0.00103224	BSF	both	both
Tb427-010011800	1.90688	2.71227e-07	1.36669	2.76774e-09	BSF	both	both
Tb427-110155500	1.71059	3.45292e-06	1.36628	7.13972e-08	BSF	both	both
Tb427-050050200:pseudogene	1.9865	0.000101755	1.36601	0.000831703	BSF	both	both
Tb427-100118800	2.26103	0.000214345	1.36458	0.000619867	BSF	both	both
Tb427-110107600	1.99647	7.43742e-14	1.36445	1.76297e-08	BSF	both	both
Tb427-040019300	2.17124	0.000220627	1.36387	0.00558639	BSF	both	both
Tb427-050044900	1.94867	6.75465e-05	1.36299	3.50423e-05	BSF	both	both
Tb427-040056700	2.73203	1.10942e-06	1.36283	2.88269e-06	BSF	both	both
Tb427-110085000	2.17759	0.000422472	1.36247	2.86807e-05	BSF	both	both
Tb427-030031000	1.81973	7.17181e-07	1.36235	2.95531e-06	BSF	both	both
Tb427-060016900	1.89828	7.17009e-05	1.36218	0.00924724	BSF	both	both
Tb427-010029000	1.66109	0.000452428	1.36104	5.06023e-06	BSF	both	both
Tb427-080012900	2.22941	0.00477727	1.36088	0.00329332	BSF	both	both
Tb427-070029600	1.60222	0.000423483	1.35871	2.34885e-12	BSF	both	both
Tb427-100065700	2.18344	0.000107574	1.35719	0.00238101	BSF	both	both
Tb427-100157800	2.14921	2.06827e-07	1.35677	1.07754e-05	BSF	both	both
Tb427-090086100	1.82596	4.93659e-05	1.35668	0.000134326	BSF	both	both
Tb427-110162500	1.86114	0.00440878	1.35635	3.66906e-05	BSF	both	both
Tb427-090052600	2.09817	8.85008e-12	1.35549	3.42253e-17	BSF	both	both
Tb427-110038700	1.67091	1.07424e-09	1.35325	1.87362e-11	BSF	both	both
Tb427-100082100	2.2277	0.00238573	1.35294	0.00342654	BSF	both	both
Tb427-070039000	2.54415	2.22458e-11	1.35272	1.01447e-10	BSF	both	both
Tb427-100041700	1.71795	0.00107959	1.35248	0.000224434	BSF	both	both
Tb427-070011100	1.79817	0.00646768	1.35183	0.00445965	BSF	both	both
Tb427-030020700	2.06703	5.19162e-05	1.35157	9.1307e-08	BSF	both	both
Tb427-110082300	3.27119	6.45684e-17	1.34995	4.40444e-10	BSF	both	both
Tb427-030011700	1.70001	0.00461873	1.3497	1.54763e-05	BSF	both	both
Tb427-010019900	1.93783	6.3864e-06	1.34869	0.00069179	BSF	both	both
Tb427-100047500	2.17911	4.5209e-11	1.34864	7.58143e-09	BSF	both	both
Tb427-070077100	1.83566	0.000220408	1.34768	0.000324062	BSF	both	both
Tb427-090063500	1.99923	1.40464e-17	1.34756	1.77322e-11	BSF	both	both
Tb427-040022900	2.79627	5.00883e-08	1.34728	2.95993e-06	BSF	both	both
Tb427-100094000	1.5563	7.74753e-07	1.34684	1.32457e-15	BSF	both	both
Tb427-100057600	1.71643	9.51912e-08	1.34653	6.15123e-06	BSF	both	both
Tb427-070040900	1.58142	1.57162e-14	1.3463	2.72687e-19	BSF	both	both
Tb427-080022400	1.59731	0.00722045	1.34498	5.10366e-06	BSF	both	both
Tb427-080068400	1.70902	0.00121904	1.34459	0.00677668	BSF	both	both
Tb427-080027000	1.66967	0.000493863	1.34396	0.0044706	BSF	both	both
Tb427-030028000	1.61811	0.00422603	1.34359	0.00105252	BSF	both	both
Tb427-110108000	2.04924	0.000618663	1.34263	0.000607421	BSF	both	both
Tb427-090057800	3.16328	0.00133791	1.34091	0.00407511	BSF	both	both
Tb427-100055800	1.70429	3.12887e-08	1.34069	8.39544e-09	BSF	both	both
Tb427-110100100	1.87998	1.04761e-07	1.34042	1.04015e-06	BSF	both	both
Tb427-030021100	1.50095	0.00420898	1.3394	9.52447e-05	BSF	both	both
Tb427-080085200	1.66547	2.59772e-15	1.33831	1.39538e-05	BSF	both	both
Tb427-100152900	1.6334	0.00533639	1.33806	0.00316772	BSF	both	both
Tb427-020006700	1.51497	0.00391091	1.33672	0.000116038	BSF	both	both
Tb427-030028400	2.67634	0.000452428	1.33569	0.00184906	BSF	both	both
Tb427-100055100:pseudogene	2.01725	6.44549e-05	1.33557	0.000191525	BSF	both	both
Tb427-020025000	1.84758	0.00922002	1.33482	0.00949532	BSF	both	both
Tb427-100101000	1.84292	0.000379161	1.33449	0.0071491	BSF	both	both
Tb427-080007800	2.56744	1.93313e-05	1.33429	0.000643152	BSF	both	both
Tb427-070022200	1.64704	9.58805e-05	1.33408	5.02719e-10	BSF	both	both
Tb427-070026300	1.97851	0.000542891	1.33364	1.53195e-13	BSF	both	both
Tb427-080041600	2.35762	3.30008e-12	1.33318	0.00118125	BSF	both	both
Tb427-090039000	1.78301	0.00926005	1.33317	1.19351e-07	BSF	both	both
Tb427-070045400	1.83195	0.000540075	1.3322	0.00102967	BSF	both	both
Tb427-110178400	1.70076	8.77537e-10	1.33173	3.36539e-30	BSF	both	both
Tb427-110009800	2.00604	7.14703e-08	1.33058	0.00122326	BSF	both	both
Tb427-110155100	1.77269	0.00101326	1.32996	0.000869111	BSF	both	both
Tb427-040008000	1.99547	0.000203657	1.32983	0.00951041	BSF	both	both
Tb427-100144100	1.52255	0.00393717	1.32959	2.79612e-06	BSF	both	both
Tb427-050033200	2.20286	4.31444e-06	1.32948	0.000525196	BSF	both	both
Tb427-020017800	1.62029	2.88227e-14	1.32867	9.96999e-22	BSF	both	both
Tb427-090062300	2.12173	0.00147473	1.32557	0.000427456	BSF	both	both
Tb427-080009300	1.54431	5.26694e-06	1.32474	6.42998e-08	BSF	both	both
Tb427-090043700	1.89526	8.20986e-05	1.32446	4.51409e-05	BSF	both	both
Tb427-050044700	2.03134	1.21009e-06	1.32391	0.00050018	BSF	both	both
Tb427-110012500	3.35729	1.47876e-06	1.32133	0.000351058	BSF	both	both
Tb427-070067500	3.01974	2.4334e-06	1.321	2.50718e-05	BSF	both	both
Tb427-010016300	1.57614	0.00558119	1.32041	6.20111e-06	BSF	both	both
Tb427-040022800	2.21756	3.09756e-12	1.32022	1.01964e-12	BSF	both	both
Tb427-090006300	1.51402	1.6795e-06	1.31899	0.00468085	BSF	both	both
Tb427-090049400	2.24448	3.2973e-06	1.31666	0.000464363	BSF	both	both
Tb427-100170400	2.61119	0.000348162	1.31645	6.20213e-11	BSF	both	both
Tb427-050051600	1.72046	9.97774e-07	1.31574	8.82065e-08	BSF	both	both
Tb427-110139400	2.16402	0.00221866	1.3155	0.000459316	BSF	both	both
Tb427-060036600	1.71744	8.23847e-08	1.31547	1.56334e-05	BSF	both	both
Tb427-000677400	2.12604	2.12549e-05	1.31472	0.00854717	BSF	both	both
Tb427-010016100	3.81327	1.01221e-28	1.31448	7.83514e-19	BSF	both	both
Tb427-010030200	1.63821	0.00662845	1.3142	0.00560635	BSF	both	both
Tb427-080066200	1.98588	0.00662207	1.31402	0.0037294	BSF	both	both
Tb427-070036300	1.89777	0.00522215	1.31362	0.000118865	BSF	both	both
Tb427-070053000	1.8169	0.000538512	1.31274	2.06441e-05	BSF	both	both
Tb427-040041000:pseudogene	2.09811	0.000983273	1.31199	0.00210204	BSF	both	both
Tb427-110158500	1.72208	9.84719e-06	1.3115	0.000341139	BSF	both	both
Tb427-020021900	1.67294	6.08237e-07	1.31125	0.00704843	BSF	both	both
Tb427-110043600	1.50119	0.00150977	1.31063	6.33924e-07	BSF	both	both
Tb427-090007300	1.98806	0.000413876	1.31033	2.61868e-05	BSF	both	both
Tb427-030010800	2.00989	1.91012e-07	1.31031	7.40505e-13	BSF	both	both
Tb427-090011400	1.68236	1.98923e-13	1.31008	0.00012276	BSF	both	both
Tb427-100056500	1.53452	2.37075e-05	1.30999	2.27544e-06	BSF	both	both
Tb427-020030200	2.10377	2.51558e-05	1.30957	2.84659e-06	BSF	both	both
Tb427-100168800	2.12358	0.000503802	1.30893	2.05653e-05	BSF	both	both
Tb427-100170800	1.90804	1.06255e-11	1.30883	4.90312e-05	BSF	both	both
Tb427-100066100	2.22185	0.000196251	1.30858	0.00579137	BSF	both	both
Tb427-110106100	2.05696	0.00958151	1.30803	0.00420814	BSF	both	both
Tb427-030048400	2.0397	4.59842e-05	1.30501	5.01452e-08	BSF	both	both
Tb427-080078800	1.57309	4.21411e-05	1.30476	6.75856e-06	BSF	both	both
Tb427-080048100	1.76249	1.89022e-11	1.30423	1.06888e-07	BSF	both	both
Tb427-100127400	2.30273	0.00102173	1.30373	0.00031448	BSF	both	both
Tb427-060042400	1.88719	7.87245e-24	1.30371	3.94414e-33	BSF	both	both
Tb427-080081700	1.63744	0.00475752	1.30346	0.000267105	BSF	both	both
Tb427-040030500:pseudogene	2.1151	3.13395e-05	1.30243	0.00069179	BSF	both	both
Tb427-110168100	1.66443	5.39474e-05	1.30117	0.00074251	BSF	both	both
Tb427-050010800	2.76281	2.735e-25	1.3008	0.000944459	BSF	both	both
Tb427-080011800	1.63434	0.000201694	1.29854	8.23719e-05	BSF	both	both
Tb427-050029200	2.115	3.45599e-06	1.29786	0.00043121	BSF	both	both
Tb427-100014400	1.83119	0.00263851	1.29776	0.00583416	BSF	both	both
Tb427-050051300	1.98125	2.50793e-19	1.29692	1.16274e-05	BSF	both	both
Tb427-050040300	2.85566	3.29882e-08	1.2966	3.66164e-05	BSF	both	both
Tb427-110031000	2.00917	2.77062e-26	1.2946	2.0566e-22	BSF	both	both
Tb427-070039500	1.7223	0.00386114	1.2943	0.000655676	BSF	both	both
Tb427-030058400	1.97571	1.98726e-06	1.29305	9.92782e-07	BSF	both	both
Tb427-040006600	1.97641	0.00160604	1.29247	9.78167e-05	BSF	both	both
Tb427-100027800:pseudogene	1.70839	2.29076e-06	1.29138	7.49407e-28	BSF	both	both
Tb427-070031300	2.33078	0.00773393	1.28919	0.00148222	BSF	both	both
Tb427-100161700	1.52024	0.000375516	1.28878	6.24774e-05	BSF	both	both
Tb427-110087800	1.70227	8.8633e-06	1.28876	7.87814e-07	BSF	both	both
Tb427-110015900	1.72009	4.64285e-07	1.28834	0.00432067	BSF	both	both
Tb427-100114300	1.83553	0.000165016	1.28806	7.65855e-05	BSF	both	both
Tb427-110158700	1.55706	1.63568e-05	1.28774	1.58549e-25	BSF	both	both
Tb427-030034500	1.95117	0.00342863	1.28674	0.000537916	BSF	both	both
Tb427-030029900	1.99975	0.000199654	1.28626	2.24915e-06	BSF	both	both
Tb427-060049000	1.75131	2.49379e-06	1.28601	0.00322136	BSF	both	both
Tb427-110043400	1.74084	1.09321e-06	1.28578	4.72616e-05	BSF	both	both
Tb427-100027900	1.76123	1.05208e-08	1.28464	2.0218e-15	BSF	both	both
Tb427-110187900	1.82803	0.00682274	1.28444	0.00351964	BSF	both	both
Tb427-030032200:pseudogene	1.73063	9.91769e-09	1.28216	0.00177795	BSF	both	both
Tb427-030041000	2.10612	0.00484766	1.28182	0.00445965	BSF	both	both
Tb427-100072900	1.88889	1.56433e-05	1.28172	3.59303e-05	BSF	both	both
Tb427-080042500	1.55773	9.74545e-05	1.28059	1.74396e-09	BSF	both	both
Tb427-020024300	2.80562	9.87573e-08	1.27823	0.000615413	BSF	both	both
Tb427-040057100	2.56137	1.05109e-05	1.27586	0.00701966	BSF	both	both
Tb427-080039100	1.5016	3.25488e-06	1.2751	1.21501e-06	BSF	both	both
Tb427-060042300	3.26923	2.57361e-50	1.27502	7.64045e-41	BSF	both	both
Tb427-100017200:pseudogene	1.60947	3.15143e-05	1.2749	3.43792e-05	BSF	both	both
Tb427-100037500	1.71332	1.73251e-08	1.27365	0.00145899	BSF	both	both
Tb427-080088800	1.55949	4.2935e-15	1.26794	0.00967954	BSF	both	both
Tb427-060043800	1.99736	8.33371e-08	1.26755	6.04442e-05	BSF	both	both
Tb427-050040500	1.60255	0.000168455	1.2658	1.28206e-05	BSF	both	both
Tb427-110142100	1.59537	0.000421108	1.26572	0.000631881	BSF	both	both
Tb427-110082400	1.60765	0.00188225	1.26475	0.00219028	BSF	both	both
Tb427-110185900	1.83109	1.7041e-09	1.26442	2.81641e-13	BSF	both	both
Tb427-060055700	1.57493	2.72984e-18	1.26405	6.37024e-44	BSF	both	both
Tb427-100145900	1.64766	1.80447e-06	1.26347	2.04105e-10	BSF	both	both
Tb427-100052400	2.94264	0.00020564	1.26322	0.00780833	BSF	both	both
Tb427-050012700	2.05713	0.000246574	1.26318	0.00201157	BSF	both	both
Tb427-110042100	1.61981	4.83087e-08	1.26298	6.46268e-16	BSF	both	both
Tb427-110081200	2.0743	9.75786e-05	1.26291	0.00592003	BSF	both	both
Tb427-110058500	1.58555	0.00722962	1.26054	1.06232e-06	BSF	both	both
Tb427-080024100	1.66764	0.00352887	1.26053	0.00344558	BSF	both	both
Tb427-100086000	1.88972	3.36417e-15	1.26041	4.70428e-10	BSF	both	both
Tb427-060014200	1.62159	0.0035125	1.25875	0.00214846	BSF	both	both
Tb427-040047900	1.84331	5.30639e-06	1.25836	0.00329216	BSF	both	both
Tb427-100104300	1.53473	0.000190448	1.25773	2.75764e-06	BSF	both	both
Tb427-030032300	1.96634	0.000397551	1.2556	0.00639663	BSF	both	both
Tb427-080025300	2.82587	5.04664e-07	1.25558	0.000208228	BSF	both	both
Tb427-070032300	1.81881	3.3411e-08	1.25491	1.63591e-05	BSF	both	both
Tb427-110031400	1.86221	1.32131e-09	1.25206	1.18447e-08	BSF	both	both
Tb427-110161200	1.61496	0.00178206	1.2514	0.000176193	BSF	both	both
Tb427-070016300	1.51805	0.000488249	1.25039	0.0027828	BSF	both	both
Tb427-080083500	1.67566	0.00327668	1.25011	0.00498048	BSF	both	both
Tb427-100160100	1.69599	1.90354e-05	1.24564	0.000299148	BSF	both	both
Tb427-110054600	1.58811	0.00431788	1.2453	0.00101955	BSF	both	both
Tb427-020018700	1.99771	1.3797e-06	1.24494	0.00708028	BSF	both	both
Tb427-050022300	2.01071	5.83717e-06	1.24449	0.000302218	BSF	both	both
Tb427-100109200	2.59588	3.16271e-06	1.24367	5.1852e-15	BSF	both	both
Tb427-090073100	1.7865	2.06828e-22	1.2422	5.83346e-46	BSF	both	both
Tb427-100119300	1.92991	0.0019788	1.24194	3.32926e-08	BSF	both	both
Tb427-100149800	1.87219	1.9659e-06	1.24192	7.65556e-06	BSF	both	both
Tb427-040036000	1.74746	1.41198e-19	1.24187	6.31751e-11	BSF	both	both
Tb427-070078900	1.65958	0.00103642	1.24152	0.000670713	BSF	both	both
Tb427-080043000	1.76885	0.00502547	1.24107	0.00871587	BSF	both	both
Tb427-100092100	1.82	0.000238011	1.2408	6.25448e-18	BSF	both	both
Tb427-030016500	1.77668	6.83935e-06	1.23946	4.58319e-06	BSF	both	both
Tb427-060036000	1.65162	0.00138089	1.2392	0.00101067	BSF	both	both
Tb427-100130000	1.71231	0.0019708	1.23793	4.20081e-13	BSF	both	both
Tb427-110185100	2.18266	7.96475e-07	1.23383	0.000846647	BSF	both	both
Tb427-110104600	1.53505	0.00202387	1.23275	0.000113381	BSF	both	both
Tb427-050006700	1.81749	0.00385005	1.23089	6.29691e-05	BSF	both	both
Tb427-110169300	1.74105	1.61935e-05	1.22939	0.00539165	BSF	both	both
Tb427-110188100	1.88939	0.000775443	1.22912	0.0081041	BSF	both	both
Tb427-090016200	1.55034	4.64285e-07	1.22681	0.000326299	BSF	both	both
Tb427-110089600	1.92951	7.35469e-06	1.22658	0.00296335	BSF	both	both
Tb427-060041400	1.70789	1.48557e-05	1.22408	7.35045e-05	BSF	both	both
Tb427-110169700	1.93346	5.41159e-06	1.22313	0.00389546	BSF	both	both
Tb427-100115200	1.53744	0.000511608	1.22069	0.000872045	BSF	both	both
Tb427-100085200	1.60204	1.53316e-10	1.22039	2.16463e-07	BSF	both	both
Tb427-040011900	1.83814	4.74738e-05	1.21721	0.000122387	BSF	both	both
Tb427-050030300	1.64397	0.00393385	1.21654	0.00679046	BSF	both	both
Tb427-080066800	1.64107	3.73282e-05	1.2162	2.12202e-20	BSF	both	both
Tb427-100120100	1.63992	7.01312e-11	1.21494	1.67871e-09	BSF	both	both
Tb427-100068400:pseudogene	2.3015	3.27899e-06	1.21306	0.000998417	BSF	both	both
Tb427-000110300	2.03192	7.89604e-15	1.21257	1.53562e-07	BSF	both	both
Tb427-100167200	1.98016	3.08737e-27	1.21156	1.76525e-37	BSF	both	both
Tb427-080029400	2.01746	3.03664e-08	1.21044	0.000168296	BSF	both	both
Tb427-100087000	1.60126	0.000233644	1.20688	2.59694e-06	BSF	both	both
Tb427-110163900	1.78545	5.50179e-06	1.20627	0.0083289	BSF	both	both
Tb427-020016800	1.6736	0.000119536	1.20311	1.05205e-05	BSF	both	both
Tb427-040018800	1.90931	3.3341e-05	1.2029	0.00798679	BSF	both	both
Tb427-100156500	2.2401	0.00512954	1.20088	2.25716e-08	BSF	both	both
Tb427-100073300	1.52885	1.08543e-09	1.20084	4.36683e-07	BSF	both	both
Tb427-050051200	2.10539	7.6364e-19	1.19957	9.0972e-09	BSF	both	both
Tb427-070068300	1.60682	0.00152457	1.19838	0.0050023	BSF	both	both
Tb427-060039800	1.62258	4.27627e-20	1.19832	4.64051e-40	BSF	both	both
Tb427-110151400	1.61056	0.0023848	1.19812	0.00387206	BSF	both	both
Tb427-100033600	1.85351	4.42213e-06	1.19774	9.24633e-06	BSF	both	both
Tb427-090034800	2.33192	4.17207e-36	1.19434	5.1767e-10	BSF	both	both
Tb427-070078000	1.7932	1.26752e-09	1.19413	2.03792e-06	BSF	both	both
Tb427-100107300	1.73062	0.000142593	1.19413	0.000803326	BSF	both	both
Tb427-060043000	1.56098	7.83448e-05	1.19309	1.66332e-11	BSF	both	both
Tb427-030056900	1.92226	1.89742e-06	1.19061	0.000509485	BSF	both	both
Tb427-050032100	1.63186	0.00131423	1.19057	1.12098e-07	BSF	both	both
Tb427-090031800	1.65133	1.34942e-22	1.19043	6.89757e-29	BSF	both	both
Tb427-070050300	1.53337	0.00993598	1.18928	0.00772709	BSF	both	both
Tb427-060009400:pseudogene	1.59297	0.00274042	1.18877	0.00718585	BSF	both	both
Tb427-080049200	1.71634	1.81092e-08	1.18846	4.29779e-06	BSF	both	both
Tb427-080047000	1.9646	2.48896e-10	1.18726	0.000808814	BSF	both	both
Tb427-100133300	1.59753	0.00183194	1.18656	0.00536866	BSF	both	both
Tb427-040021100	1.83075	0.00111584	1.18291	0.000763395	BSF	both	both
Tb427-110129200	1.62237	0.000474982	1.17865	3.36003e-07	BSF	both	both
Tb427-030040600	1.78972	3.60399e-13	1.17385	1.55049e-10	BSF	both	both
Tb427-080050400	2.50799	2.23776e-24	1.1732	7.84809e-08	BSF	both	both
Tb427-050011800	1.72561	0.000531995	1.17128	0.00138825	BSF	both	both
Tb427-090029800	1.78997	1.56677e-06	1.16986	2.77695e-05	BSF	both	both
Tb427-030022000	1.61903	5.92587e-31	1.16734	1.12765e-27	BSF	both	both
Tb427-110149600	1.85323	1.07424e-09	1.16612	0.000167688	BSF	both	both
Tb427-100135600	2.24933	7.34875e-12	1.16608	2.51915e-36	BSF	both	both
Tb427-050037700	1.68044	7.02732e-05	1.16255	0.000357817	BSF	both	both
Tb427-060013300	2.12175	9.91769e-09	1.16253	0.00728187	BSF	both	both
Tb427-050012800	1.91622	4.4175e-57	1.16247	8.77776e-50	BSF	both	both
Tb427-100116700	1.5544	0.000771192	1.16077	1.39656e-08	BSF	both	both
Tb427-110104400	1.65529	1.24438e-06	1.15927	0.00715433	BSF	both	both
Tb427-090072800	1.58527	7.27207e-07	1.15802	1.8962e-10	BSF	both	both
Tb427-010017400	1.57199	1.13558e-65	1.15688	1.26708e-67	BSF	both	both
Tb427-010027100	1.62559	2.74962e-07	1.15679	0.00291305	BSF	both	both
Tb427-110073700	1.73512	5.99685e-11	1.15668	9.37747e-07	BSF	both	both
Tb427-070051200	1.9703	1.44296e-09	1.15542	2.58115e-06	BSF	both	both
Tb427-070050200	1.95374	8.93359e-06	1.15066	0.00760833	BSF	both	both
Tb427-080043300	1.93356	4.73921e-13	1.14957	0.00284775	BSF	both	both
Tb427-030010900	1.62275	1.26576e-49	1.14951	4.8671e-31	BSF	both	both
Tb427-100097400	1.74274	8.88387e-15	1.148	0.000757191	BSF	both	both
Tb427-040015600	1.55428	1.54489e-08	1.14565	1.38694e-06	BSF	both	both
Tb427-100080100	1.6757	5.98627e-25	1.13687	5.81362e-18	BSF	both	both
Tb427-110075000	1.69094	3.33727e-07	1.13678	7.95995e-05	BSF	both	both
Tb427-070019000	2.12636	0.00876735	1.1357	0.00355158	BSF	both	both
Tb427-010028200	2.01943	0.002954	1.13542	8.18485e-07	BSF	both	both
Tb427-100140700	1.85755	1.28945e-05	1.13507	6.1192e-06	BSF	both	both
Tb427-100007900	2.14567	4.77229e-15	1.13442	5.27837e-08	BSF	both	both
Tb427-090012800	1.5134	1.15267e-05	1.13019	0.000673155	BSF	both	both
Tb427-090032000	2.02107	5.47973e-09	1.12083	0.000607421	BSF	both	both
Tb427-100069500	1.68805	2.75475e-11	1.11767	0.000129013	BSF	both	both
Tb427-010015900	1.56782	1.94034e-10	1.11459	2.10654e-08	BSF	both	both
Tb427-040042400	1.70647	1.31786e-16	1.11262	3.85642e-21	BSF	both	both
Tb427-090028400	1.80528	1.99793e-17	1.10973	0.000231651	BSF	both	both
Tb427-100049600	1.75963	1.72829e-19	1.10624	0.000160505	BSF	both	both
Tb427-060013500	1.55108	1.41084e-12	1.10478	5.39542e-06	BSF	both	both
Tb427-080036000	1.57853	1.56702e-07	1.09478	6.30861e-07	BSF	both	both
Tb427-100125100	1.74649	1.5247e-13	1.09438	2.84892e-06	BSF	both	both
Tb427-080040300	1.51197	7.55945e-10	1.09189	0.00743254	BSF	both	both
Tb427-100069700	2.0356	3.8906e-25	1.09128	3.23236e-06	BSF	both	both
Tb427-100162700	1.63224	0.000135625	1.06781	4.05724e-08	BSF	both	both
Tb427-030013500	1.68304	7.20281e-05	1.05825	0.00412015	BSF	both	both
Tb427-010016700	1.59636	9.52129e-05	1.04916	0.00204459	BSF	both	both
Tb427-010016800	1.86218	4.16187e-34	1.04786	3.21227e-07	BSF	both	both
Tb427-060008300	1.95025	2.09396e-05	1.03986	9.31895e-13	BSF	both	both
Tb427-000108500	13.3897	6.12021e-06	904.188	0.157987	BSF	BSF	both
Tb427-020015000	30.0129	5.49779e-14	9.94255	0.0143527	BSF	BSF	both
Tb427-000578400:pseudogene	5.04383	1.51006e-07	5.32446	0.165741	BSF	BSF	both
Tb427-000311000:pseudogene	17.2216	3.0068e-14	4.11065	0.0163293	BSF	BSF	both
Tb427-000270000:pseudogene	18.5353	0.00391091	4.10786	0.0628972	BSF	BSF	both
Tb427-000109000	4.09517	2.07923e-11	4.01644	0.0242572	BSF	BSF	both
Tb427-020032900	12.367	0.000562574	3.474	0.430416	BSF	BSF	both
Tb427-020015400	7.84046	9.22412e-18	3.40521	0.0349691	BSF	BSF	both
Tb427-020015300	6.22906	2.00694e-13	3.14583	0.149288	BSF	BSF	both
Tb427-110046400:pseudogene	5.55389	0.000175339	3.1151	0.230829	BSF	BSF	both
Tb427-110046300	4.74335	7.6364e-19	2.58689	0.0627943	BSF	BSF	both
Tb427-020015700	3.38261	1.5007e-10	2.23896	0.04458	BSF	BSF	both
Tb427-110147300	2.32745	0.00128079	1.93277	0.026778	BSF	BSF	both
Tb427-000015300	1.88773	2.18837e-21	1.86227	0.112128	BSF	BSF	both
Tb427-000808800:pseudogene	12.9745	0.0021609	1.85311	0.331599	BSF	BSF	both
Tb427-000015100	1.96934	0.00701787	1.80162	0.221939	BSF	BSF	both
Tb427-020013800	5.09178	2.37214e-05	1.79895	0.508378	BSF	BSF	both
Tb427-000015500	2.85642	0.00658095	1.76638	0.623337	BSF	BSF	both
Tb427-110132100	2.52048	5.50179e-06	1.71772	0.0437063	BSF	BSF	both
Tb427-000677800:pseudogene	27.1819	0.00309286	1.70532	0.411605	BSF	BSF	both
Tb427-000578600:pseudogene	6.14635	0.00484766	1.70433	0.607718	BSF	BSF	both
Tb427-030047500	2.02959	0.00302035	1.68206	0.0251935	BSF	BSF	both
Tb427-070083700:pseudogene	2.1545	1.24439e-09	1.67161	0.0464449	BSF	BSF	both
Tb427-000484600	3.23325	0.005525	1.64284	0.386782	BSF	BSF	both
Tb427-000107300:pseudogene	2.30295	0.00453579	1.61747	0.0967584	BSF	BSF	both
Tb427-010019600	4.64295	0.00294153	1.59752	0.0153167	BSF	BSF	both
Tb427-030047800	3.0706	0.000655815	1.5862	0.0442201	BSF	BSF	both
Tb427-030014800	2.9481	1.84724e-12	1.58005	0.277129	BSF	BSF	both
Tb427-100110300	2.69463	0.00499833	1.5775	0.0254381	BSF	BSF	both
Tb427-020013900	28.9319	6.46835e-11	1.57281	0.873893	BSF	BSF	both
Tb427-080056700	2.29703	1.45073e-05	1.56787	0.0197697	BSF	BSF	both
Tb427-000014300:pseudogene	2.12203	0.000576347	1.55566	0.578301	BSF	BSF	both
Tb427-030043000	4.06133	1.01871e-06	1.54455	0.0549019	BSF	BSF	both
Tb427-090034600	1.92048	7.95773e-05	1.53954	0.051056	BSF	BSF	both
Tb427-060041100	3.96642	2.44267e-07	1.53697	0.0112428	BSF	BSF	both
Tb427-050035200	2.32029	0.00426553	1.53112	0.0826788	BSF	BSF	both
Tb427-100128200	1.98304	0.00305838	1.52659	0.0192746	BSF	BSF	both
Tb427-070007800	3.31522	0.00114622	1.52125	0.141088	BSF	BSF	both
Tb427-070048200	3.30115	1.73117e-05	1.51528	0.0255905	BSF	BSF	both
Tb427-080085100	1.87269	0.00113379	1.5116	0.0192303	BSF	BSF	both
Tb427-040043100	3.09276	6.59011e-07	1.49524	0.0160434	BSF	BSF	BSF
Tb427-040029700	2.47943	0.000275202	1.49121	0.0124063	BSF	BSF	BSF
Tb427-030005700	1.65541	0.000449247	1.46633	0.0618377	BSF	BSF	BSF
Tb427-080087100	1.91339	2.13411e-06	1.46185	0.110951	BSF	BSF	BSF
Tb427-070005400	1.95405	3.055e-08	1.46126	0.0849063	BSF	BSF	BSF
Tb427-080044400	2.23952	0.00187623	1.46051	0.0104666	BSF	BSF	BSF
Tb427-080016900	2.05106	0.00245814	1.45532	0.0321535	BSF	BSF	BSF
Tb427-000015400	2.22684	0.000296501	1.45518	0.427445	BSF	BSF	BSF
Tb427-020013700	4.44561	3.11303e-07	1.4518	0.0336291	BSF	BSF	BSF
Tb427-050034000	3.08189	0.000255279	1.44903	0.0452542	BSF	BSF	BSF
Tb427-030029700	2.35889	0.00226281	1.44465	0.0389435	BSF	BSF	BSF
Tb427-000014200	2.61525	0.0022584	1.44342	0.689169	BSF	BSF	BSF
Tb427-080088900	1.77549	6.56855e-05	1.44246	0.0181859	BSF	BSF	BSF
Tb427-000806900	2.592	0.00748953	1.44	0.052951	BSF	BSF	BSF
Tb427-000286400	3.8227	0.000110906	1.43574	0.0722784	BSF	BSF	BSF
Tb427-100038500	2.41798	9.15355e-05	1.43534	0.015766	BSF	BSF	BSF
Tb427-100143600:pseudogene	1.55283	0.003586	1.43383	0.0105714	BSF	BSF	BSF
Tb427-030047400	2.13866	9.81249e-05	1.43003	0.1322	BSF	BSF	BSF
Tb427-000757800	3.19639	0.00176728	1.42725	0.110204	BSF	BSF	BSF
Tb427-110147100	5.04585	5.03637e-13	1.42659	0.137046	BSF	BSF	BSF
Tb427-020014900	7.86217	1.09557e-10	1.42254	0.819351	BSF	BSF	BSF
Tb427-000014500:pseudogene	1.95273	1.3037e-10	1.42123	0.181962	BSF	BSF	BSF
Tb427-100046600	3.24788	9.35376e-06	1.41346	0.0156513	BSF	BSF	BSF
Tb427-000481200:pseudogene	1.50483	0.00196427	1.40756	0.0266172	BSF	BSF	BSF
Tb427-110137700	3.64749	8.94667e-05	1.40707	0.0648002	BSF	BSF	BSF
Tb427-100100200	2.17713	0.00752878	1.40508	0.165542	BSF	BSF	BSF
Tb427-040031400	2.06384	0.00349899	1.40344	0.0116074	BSF	BSF	BSF
Tb427-000669200:pseudogene	2.79855	0.000467477	1.39926	0.0502253	BSF	BSF	BSF
Tb427-070023700	2.21792	0.00862292	1.39661	0.0303721	BSF	BSF	BSF
Tb427-110014000	2.34526	0.000264021	1.39529	0.074261	BSF	BSF	BSF
Tb427-110140300	2.30518	5.46271e-06	1.39052	0.02809	BSF	BSF	BSF
Tb427-110188800	2.48697	1.153e-07	1.38825	0.0209846	BSF	BSF	BSF
Tb427-100169200	2.82742	3.83281e-06	1.38819	0.0323691	BSF	BSF	BSF
Tb427-030005200	2.50005	2.09553e-05	1.38187	0.633655	BSF	BSF	BSF
Tb427-000578500:pseudogene	6.46318	1.40341e-06	1.3816	0.79987	BSF	BSF	BSF
Tb427-000272300:pseudogene	16.1485	0.00117315	1.37688	0.382015	BSF	BSF	BSF
Tb427-090069100	2.63251	1.84648e-05	1.37408	0.0148519	BSF	BSF	BSF
Tb427-100027300	2.63819	0.00601711	1.37363	0.0110325	BSF	BSF	BSF
Tb427-070030600	1.90669	0.00476465	1.36742	0.0321485	BSF	BSF	BSF
Tb427-050008300	2.05408	0.00183685	1.3611	0.0853369	BSF	BSF	BSF
Tb427-110151200	2.16499	2.96976e-05	1.36021	0.0175066	BSF	BSF	BSF
Tb427-110168200	3.1573	3.87292e-05	1.35861	0.0147005	BSF	BSF	BSF
Tb427-050013600	2.38989	0.00304867	1.35758	0.325357	BSF	BSF	BSF
Tb427-100150200	2.18217	0.00665684	1.35713	0.0427179	BSF	BSF	BSF
Tb427-050053500	3.1554	2.14458e-19	1.35645	0.0836792	BSF	BSF	BSF
Tb427-100109400:pseudogene	3.11371	0.00746955	1.35592	0.0722784	BSF	BSF	BSF
Tb427-060040700	2.39846	0.00622238	1.35531	0.0502289	BSF	BSF	BSF
Tb427-100064000	1.99922	2.62457e-05	1.35416	0.0123538	BSF	BSF	BSF
Tb427-030030000	2.96625	0.00196663	1.34763	0.152659	BSF	BSF	BSF
Tb427-110178500	1.81156	0.00238573	1.34328	0.0328975	BSF	BSF	BSF
Tb427-040024000	2.67768	0.000119878	1.34086	0.0141408	BSF	BSF	BSF
Tb427-070059600	1.63908	0.000624062	1.33753	0.0169023	BSF	BSF	BSF
Tb427-070028100	1.81081	0.00273464	1.33616	0.0129346	BSF	BSF	BSF
Tb427-080073900	2.18051	8.61396e-32	1.33428	0.0658154	BSF	BSF	BSF
Tb427-090048400	2.06532	0.0043176	1.33325	0.0322503	BSF	BSF	BSF
Tb427-090081800	2.37211	5.85526e-09	1.33302	0.039627	BSF	BSF	BSF
Tb427-060028600	1.55545	0.00474154	1.33143	0.0317181	BSF	BSF	BSF
Tb427-110161400	3.37755	0.00198135	1.32997	0.0681085	BSF	BSF	BSF
Tb427-090060300	2.51096	0.000118108	1.3262	0.0133646	BSF	BSF	BSF
Tb427-020015200	3.28526	0.000124793	1.323	0.784734	BSF	BSF	BSF
Tb427-100154800	2.63856	0.00418946	1.32244	0.188803	BSF	BSF	BSF
Tb427-100165300	2.28835	0.00985582	1.31715	0.155719	BSF	BSF	BSF
Tb427-030030700	2.85131	0.00426553	1.30906	0.016652	BSF	BSF	BSF
Tb427-030016100	1.92438	0.000690553	1.30865	0.0752417	BSF	BSF	BSF
Tb427-020015600	3.03615	2.8983e-36	1.30528	0.355333	BSF	BSF	BSF
Tb427-060037600	1.67608	0.007379	1.3051	0.047806	BSF	BSF	BSF
Tb427-110022500	1.84524	0.0016181	1.30283	0.0125206	BSF	BSF	BSF
Tb427-030049500	1.55374	0.00278471	1.30269	0.0193379	BSF	BSF	BSF
Tb427-100102900	2.55652	0.0011895	1.29945	0.0368893	BSF	BSF	BSF
Tb427-080025700	1.83986	0.000742779	1.29862	0.0756534	BSF	BSF	BSF
Tb427-110142700	1.90452	0.00650056	1.29816	0.0143006	BSF	BSF	BSF
Tb427-110092000	2.25226	1.47845e-05	1.2947	0.0342366	BSF	BSF	BSF
Tb427-100022100	1.82906	0.000797587	1.29421	0.0201568	BSF	BSF	BSF
Tb427-050005700	1.95504	0.00778289	1.29016	0.158511	BSF	BSF	BSF
Tb427-080073300	1.8159	0.00886027	1.28549	0.0911506	BSF	BSF	BSF
Tb427-020015800	6.3214	2.14139e-21	1.28532	0.753882	BSF	BSF	BSF
Tb427-030060100	1.64367	0.00223686	1.28425	0.0653976	BSF	BSF	BSF
Tb427-110144400	1.74382	0.00172048	1.28338	0.0190914	BSF	BSF	BSF
Tb427-100070100	1.98441	0.00575035	1.28315	0.0284739	BSF	BSF	BSF
Tb427-000497700	2.58784	8.43685e-05	1.28246	0.118804	BSF	BSF	BSF
Tb427-040043400	1.89898	0.000967523	1.28175	0.0301237	BSF	BSF	BSF
Tb427-050025900	1.59861	0.00338191	1.28162	0.0331958	BSF	BSF	BSF
Tb427-110145000	2.58996	0.000483688	1.28157	0.306931	BSF	BSF	BSF
Tb427-020010200	3.4301	6.48287e-05	1.27937	0.0108769	BSF	BSF	BSF
Tb427-080044200	3.20852	0.00471349	1.27798	0.215657	BSF	BSF	BSF
Tb427-040046700	2.04826	0.000735877	1.27642	0.103266	BSF	BSF	BSF
Tb427-080008400	1.67998	0.000590784	1.27295	0.130407	BSF	BSF	BSF
Tb427-080011000	1.74903	0.00413205	1.27208	0.0651892	BSF	BSF	BSF
Tb427-100059600	2.56332	0.000639574	1.27114	0.0438287	BSF	BSF	BSF
Tb427-100149700:pseudogene	1.60072	4.44841e-21	1.26935	0.0136842	BSF	BSF	BSF
Tb427-090072600	2.1706	7.67229e-06	1.26503	0.0152615	BSF	BSF	BSF
Tb427-110072300	1.83973	0.00618935	1.26494	0.0777623	BSF	BSF	BSF
Tb427-030012300	2.23166	0.00228237	1.26347	0.0564796	BSF	BSF	BSF
Tb427-100049000	1.85679	0.00320272	1.26207	0.217154	BSF	BSF	BSF
Tb427-070015900	1.54862	0.005825	1.25561	0.0146118	BSF	BSF	BSF
Tb427-080023900	2.49337	1.60545e-15	1.25542	0.0992355	BSF	BSF	BSF
Tb427-050036800	1.66137	0.00653425	1.25162	0.0140948	BSF	BSF	BSF
Tb427-050013700	2.42151	0.000643786	1.25096	0.249364	BSF	BSF	BSF
Tb427-080011500	2.16283	4.54273e-10	1.25093	0.0274618	BSF	BSF	BSF
Tb427-060034700	2.38149	0.00821004	1.25024	0.130641	BSF	BSF	BSF
Tb427-070085400:pseudogene	39.6498	0.00947471	1.25009	0.621712	BSF	BSF	BSF
Tb427-040017100	1.59306	0.00567333	1.24916	0.0107819	BSF	BSF	BSF
Tb427-030060000	1.67193	1.14303e-06	1.2486	0.021426	BSF	BSF	BSF
Tb427-110069100:pseudogene	3.45231	0.000707546	1.24775	0.342857	BSF	BSF	BSF
Tb427-090034900	1.67567	0.0044615	1.24662	0.212435	BSF	BSF	BSF
Tb427-080089000:pseudogene	1.94316	3.15143e-05	1.2458	0.309285	BSF	BSF	BSF
Tb427-070077600	1.76155	4.16676e-08	1.24376	0.0236131	BSF	BSF	BSF
Tb427-070015100:pseudogene	2.82352	0.000650645	1.24273	0.196194	BSF	BSF	BSF
Tb427-070017600	2.03714	0.00556055	1.24012	0.0133497	BSF	BSF	BSF
Tb427-080087400	1.62066	0.00721933	1.23778	0.0877269	BSF	BSF	BSF
Tb427-090048000	1.78617	0.00344742	1.23395	0.0880101	BSF	BSF	BSF
Tb427-060040800	1.74384	0.0027727	1.23047	0.0518329	BSF	BSF	BSF
Tb427-030056000	1.66179	0.0028158	1.22717	0.054874	BSF	BSF	BSF
Tb427-100070300	2.38049	0.000618658	1.22699	0.115733	BSF	BSF	BSF
Tb427-040031900	3.19978	0.00985582	1.22664	0.318935	BSF	BSF	BSF
Tb427-110052900	2.13322	0.00411154	1.22631	0.0104219	BSF	BSF	BSF
Tb427-070032600	2.36414	1.07254e-07	1.22602	0.0927881	BSF	BSF	BSF
Tb427-100152100	1.77053	0.00667405	1.22575	0.0277131	BSF	BSF	BSF
Tb427-100154400	1.57864	3.25972e-08	1.22376	0.0532632	BSF	BSF	BSF
Tb427-030052000	1.59417	0.00292981	1.22309	0.235232	BSF	BSF	BSF
Tb427-100060000	1.88317	0.00700707	1.22258	0.254418	BSF	BSF	BSF
Tb427-090021600	3.11539	0.000548421	1.22235	0.122218	BSF	BSF	BSF
Tb427-110092100	1.82676	3.67591e-12	1.2204	0.0610166	BSF	BSF	BSF
Tb427-110073200	1.79821	0.000252895	1.21879	0.0176214	BSF	BSF	BSF
Tb427-010006500	1.71313	3.35691e-08	1.21734	0.04458	BSF	BSF	BSF
Tb427-000015600:pseudogene	1.62488	4.1226e-05	1.21661	0.668922	BSF	BSF	BSF
Tb427-110090300	2.07537	0.00180851	1.21527	0.0836749	BSF	BSF	BSF
Tb427-080087000	1.68358	1.41909e-06	1.21232	0.259745	BSF	BSF	BSF
Tb427-090026500	2.52492	0.00344962	1.20629	0.284035	BSF	BSF	BSF
Tb427-050027300	2.0322	8.10565e-07	1.20606	0.0489785	BSF	BSF	BSF
Tb427-110123300	1.51487	6.91776e-05	1.20479	0.0567655	BSF	BSF	BSF
Tb427-100155300	1.54341	0.00272773	1.20147	0.0614885	BSF	BSF	BSF
Tb427-100083800	3.03057	6.80178e-05	1.20065	0.21302	BSF	BSF	BSF
Tb427-080060500	3.76889	0.00422252	1.20037	0.0843068	BSF	BSF	BSF
Tb427-100013000	2.48118	9.40497e-05	1.20026	0.404805	BSF	BSF	BSF
Tb427-040053100	2.52065	0.00454774	1.19945	0.0968056	BSF	BSF	BSF
Tb427-060035800	1.88951	0.000240199	1.19829	0.05145	BSF	BSF	BSF
Tb427-100164000	1.56241	0.00383017	1.19811	0.296354	BSF	BSF	BSF
Tb427-110093600	1.50123	0.00500112	1.19722	0.170116	BSF	BSF	BSF
Tb427-050036400	2.13875	0.00775364	1.19647	0.214299	BSF	BSF	BSF
Tb427-100052100:pseudogene	1.86304	0.00269294	1.19445	0.0651097	BSF	BSF	BSF
Tb427-030014300	2.58688	7.69711e-07	1.19364	0.191132	BSF	BSF	BSF
Tb427-020006500	1.60438	0.000504332	1.1924	0.0314385	BSF	BSF	BSF
Tb427-080013700	1.54663	0.00324695	1.19178	0.0674391	BSF	BSF	BSF
Tb427-100149900	1.84903	4.99357e-18	1.19164	0.0849063	BSF	BSF	BSF
Tb427-100014300	2.41363	0.000364363	1.19061	0.0452542	BSF	BSF	BSF
Tb427-080082600:pseudogene	2.08122	0.00342904	1.19006	0.397737	BSF	BSF	BSF
Tb427-110046200	2.44825	0.000876243	1.1894	0.695672	BSF	BSF	BSF
Tb427-040023000	1.73821	0.000112314	1.18828	0.0202212	BSF	BSF	BSF
Tb427-070008900	1.90326	0.00746268	1.18774	0.0344045	BSF	BSF	BSF
Tb427-090028100	3.04108	0.000221619	1.18735	0.159813	BSF	BSF	BSF
Tb427-030049800	1.62372	0.000371149	1.18725	0.228548	BSF	BSF	BSF
Tb427-050011900	1.93936	0.00767633	1.18656	0.134083	BSF	BSF	BSF
Tb427-060018900	2.82512	0.0039892	1.1857	0.205648	BSF	BSF	BSF
Tb427-080026200	1.66307	0.00145384	1.18473	0.0418705	BSF	BSF	BSF
Tb427-100150800	2.47796	0.00312236	1.18374	0.183605	BSF	BSF	BSF
Tb427-050025600	1.7728	3.00484e-06	1.18373	0.0130908	BSF	BSF	BSF
Tb427-080038400	3.03068	0.000250785	1.18326	0.42556	BSF	BSF	BSF
Tb427-080044100:pseudogene	1.99838	0.00913319	1.18221	0.422689	BSF	BSF	BSF
Tb427-080073200	2.28651	2.9157e-05	1.182	0.22321	BSF	BSF	BSF
Tb427-090056300	2.14003	0.000883191	1.18084	0.294711	BSF	BSF	BSF
Tb427-090039800	2.01045	6.76764e-05	1.18067	0.0358765	BSF	BSF	BSF
Tb427-110046500	1.87551	0.00636349	1.17989	0.0252232	BSF	BSF	BSF
Tb427-100026900	1.96336	0.00207547	1.17933	0.0788713	BSF	BSF	BSF
Tb427-080069600	1.61251	1.37487e-11	1.17666	0.025609	BSF	BSF	BSF
Tb427-010031500	2.94449	0.00172882	1.17531	0.325572	BSF	BSF	BSF
Tb427-080046300	1.58371	0.00174954	1.17524	0.0117532	BSF	BSF	BSF
Tb427-100016300:pseudogene	1.56419	0.00578237	1.17249	0.130626	BSF	BSF	BSF
Tb427-000276400	1.90554	0.00623025	1.1723	0.247033	BSF	BSF	BSF
Tb427-030012800	2.32457	0.00963977	1.17223	0.203042	BSF	BSF	BSF
Tb427-030051700	2.42948	0.000306329	1.17199	0.31942	BSF	BSF	BSF
Tb427-110135100	1.58682	0.00203552	1.17159	0.028171	BSF	BSF	BSF
Tb427-100005700	1.88888	0.00453579	1.17133	0.142396	BSF	BSF	BSF
Tb427-080065100	1.89283	0.00260838	1.17035	0.0783958	BSF	BSF	BSF
Tb427-110021500	1.58747	0.00344436	1.16903	0.0576234	BSF	BSF	BSF
Tb427-030014400	2.77548	3.27899e-06	1.16855	0.873893	BSF	BSF	BSF
Tb427-090050100	1.68308	1.3407e-06	1.16779	0.0499154	BSF	BSF	BSF
Tb427-040043200	1.70949	0.0002543	1.16771	0.0203938	BSF	BSF	BSF
Tb427-090058200	2.64163	2.40776e-07	1.16742	0.191659	BSF	BSF	BSF
Tb427-100078500	2.02173	0.00277718	1.16723	0.13801	BSF	BSF	BSF
Tb427-110037300	1.61123	0.00737455	1.16649	0.107691	BSF	BSF	BSF
Tb427-000175100	2.03641	0.00714291	1.16561	0.867201	BSF	BSF	BSF
Tb427-060013000	1.60862	0.00207628	1.16355	0.0654345	BSF	BSF	BSF
Tb427-080074700	1.94424	0.00745612	1.16186	0.270299	BSF	BSF	BSF
Tb427-010010800	1.64857	0.00896136	1.16141	0.319684	BSF	BSF	BSF
Tb427-070067100	1.80651	0.00617928	1.16057	0.353622	BSF	BSF	BSF
Tb427-090019200	1.63367	0.00694828	1.15972	0.168357	BSF	BSF	BSF
Tb427-030026700	1.99032	0.00440917	1.15877	0.375848	BSF	BSF	BSF
Tb427-090019400	1.84867	0.000102436	1.15778	0.0214817	BSF	BSF	BSF
Tb427-080079400	2.57477	0.00925008	1.15691	0.382178	BSF	BSF	BSF
Tb427-040021000	2.10042	0.00015744	1.15605	0.0270732	BSF	BSF	BSF
Tb427-070013200	2.03881	0.00149637	1.15536	0.0319159	BSF	BSF	BSF
Tb427-110187800	1.66459	0.00109732	1.15354	0.077324	BSF	BSF	BSF
Tb427-090090100	2.36885	1.27727e-08	1.15244	0.0923098	BSF	BSF	BSF
Tb427-100066000	2.42715	0.000499341	1.15217	0.15174	BSF	BSF	BSF
Tb427-100100300	2.08504	0.00109635	1.15035	0.0380721	BSF	BSF	BSF
Tb427-110153800	1.57972	0.0076974	1.14959	0.15745	BSF	BSF	BSF
Tb427-020016000	4.45667	0.00939441	1.14854	0.750835	BSF	BSF	BSF
Tb427-070070100	1.69102	0.0015633	1.14736	0.205155	BSF	BSF	BSF
Tb427-100170700	2.632	0.00123686	1.14729	0.244927	BSF	BSF	BSF
Tb427-090072500	2.91124	1.92635e-05	1.14622	0.33229	BSF	BSF	BSF
Tb427-100142500	1.95824	0.000115334	1.14553	0.22659	BSF	BSF	BSF
Tb427-100135300	1.69897	0.00926518	1.14517	0.0451483	BSF	BSF	BSF
Tb427-040031500	1.58296	2.31735e-06	1.14192	0.204116	BSF	BSF	BSF
Tb427-070047300	1.50116	0.00857508	1.13872	0.228925	BSF	BSF	BSF
Tb427-110107300	2.05339	0.00233263	1.13516	0.0736184	BSF	BSF	BSF
Tb427-050025200	1.84571	0.000963616	1.13339	0.397737	BSF	BSF	BSF
Tb427-100055700:pseudogene	1.94384	9.26143e-08	1.13267	0.0209846	BSF	BSF	BSF
Tb427-070014900	1.5247	0.00384651	1.13021	0.0731967	BSF	BSF	BSF
Tb427-060007900	1.83966	0.00132391	1.12966	0.225151	BSF	BSF	BSF
Tb427-100148500	1.8603	0.00409258	1.12885	0.109209	BSF	BSF	BSF
Tb427-110189600	1.62834	0.000827385	1.12712	0.0114874	BSF	BSF	BSF
Tb427-030050600	2.03154	1.39295e-13	1.12707	0.375525	BSF	BSF	BSF
Tb427-080011900	1.77273	0.000893688	1.12663	0.0274679	BSF	BSF	BSF
Tb427-000792500	2.54531	2.58253e-08	1.12507	0.691308	BSF	BSF	BSF
Tb427-070038300	3.25659	0.000230073	1.12488	0.273329	BSF	BSF	BSF
Tb427-080039000	1.59245	0.000832208	1.12367	0.369286	BSF	BSF	BSF
Tb427-030016600	2.04334	0.000575325	1.12309	0.0121452	BSF	BSF	BSF
Tb427-090005500	2.16464	0.00383017	1.12213	0.602602	BSF	BSF	BSF
Tb427-080035400	1.78014	0.000269606	1.12126	0.18646	BSF	BSF	BSF
Tb427-090014900	2.60393	0.000738519	1.11991	0.61519	BSF	BSF	BSF
Tb427-110183100	2.38525	4.20915e-05	1.11987	0.184001	BSF	BSF	BSF
Tb427-070057800	2.3873	3.1821e-05	1.11936	0.354226	BSF	BSF	BSF
Tb427-110182900	1.9852	0.00201036	1.11615	0.382443	BSF	BSF	BSF
Tb427-100098400	2.49188	0.0090053	1.1144	0.509131	BSF	BSF	BSF
Tb427-110022000	1.56248	0.00252454	1.11374	0.286612	BSF	BSF	BSF
Tb427-090056500	2.01277	3.29453e-05	1.11359	0.0509909	BSF	BSF	BSF
Tb427-080058000	1.65416	0.00116776	1.11348	0.609186	BSF	BSF	BSF
Tb427-110143500	2.65889	0.000617508	1.11318	0.0923098	BSF	BSF	BSF
Tb427-110043300	1.60066	0.000221389	1.11245	0.187663	BSF	BSF	BSF
Tb427-050008400	1.67943	0.00617248	1.11184	0.392531	BSF	BSF	BSF
Tb427-090063400	1.50267	0.00141309	1.11161	0.0236902	BSF	BSF	BSF
Tb427-110091700	9.80584	1.26875e-05	1.1101	0.59048	BSF	BSF	BSF
Tb427-110180200	6.71294	0.000852393	1.10814	0.8462	BSF	BSF	BSF
Tb427-030040400	1.92749	4.92124e-13	1.10812	0.0114645	BSF	BSF	BSF
Tb427-100116100	1.59065	0.00972533	1.10772	0.0243032	BSF	BSF	BSF
Tb427-110128000	1.53003	5.14641e-05	1.10735	0.141667	BSF	BSF	BSF
Tb427-070006600	1.55971	0.000827385	1.10611	0.585233	BSF	BSF	BSF
Tb427-050053000	2.29103	2.10924e-05	1.10603	0.210889	BSF	BSF	BSF
Tb427-090072700	2.09191	0.000740439	1.1055	0.0944471	BSF	BSF	BSF
Tb427-070041200	1.71456	0.000181501	1.10459	0.0653561	BSF	BSF	BSF
Tb427-100077400	2.54006	2.64978e-06	1.10175	0.53697	BSF	BSF	BSF
Tb427-090080100	1.66809	0.000404556	1.09996	0.116639	BSF	BSF	BSF
Tb427-070032000	2.1847	0.00239854	1.09946	0.245703	BSF	BSF	BSF
Tb427-100091700	1.60025	1.41774e-09	1.0981	0.619759	BSF	BSF	BSF
Tb427-080086000	1.60086	0.00349254	1.09668	0.632359	BSF	BSF	BSF
Tb427-050035900	2.10586	5.85993e-06	1.09412	0.142396	BSF	BSF	BSF
Tb427-040047100	3.12689	0.00144865	1.09358	0.5994	BSF	BSF	BSF
Tb427-110164700	2.08496	0.00943056	1.09331	0.776879	BSF	BSF	BSF
Tb427-010024700	3.04142	1.6596e-05	1.09302	0.548227	BSF	BSF	BSF
Tb427-100151000	1.71076	4.55085e-07	1.09266	0.255525	BSF	BSF	BSF
Tb427-110038100	1.63859	0.00775605	1.09248	0.34439	BSF	BSF	BSF
Tb427-110132400	1.70133	0.00221866	1.09172	0.0960554	BSF	BSF	BSF
Tb427-110037900	1.84982	2.07604e-05	1.0903	0.0951545	BSF	BSF	BSF
Tb427-000015200:pseudogene	1.61087	9.62512e-06	1.08983	0.809077	BSF	BSF	BSF
Tb427-000747600	2.71811	0.00312979	1.08752	0.82382	BSF	BSF	BSF
Tb427-110017600	2.10089	0.00289902	1.08679	0.675755	BSF	BSF	BSF
Tb427-110028900	2.21524	1.95956e-11	1.08678	0.708565	BSF	BSF	BSF
Tb427-100160500	1.53329	1.4685e-13	1.08547	0.0648002	BSF	BSF	BSF
Tb427-050053100	6.45503	0.00833949	1.08547	0.845837	BSF	BSF	BSF
Tb427-050025400	1.78427	0.00221257	1.08367	0.525713	BSF	BSF	BSF
Tb427-110053700	1.6743	8.47799e-06	1.08303	0.434551	BSF	BSF	BSF
Tb427-040052700	1.61216	0.00686661	1.08211	0.304185	BSF	BSF	BSF
Tb427-010014400	1.78353	0.000900879	1.08185	0.269572	BSF	BSF	BSF
Tb427-110036000	2.35348	0.00963667	1.08178	0.434744	BSF	BSF	BSF
Tb427-050007800	2.36329	0.000425127	1.08111	0.831343	BSF	BSF	BSF
Tb427-110163400	1.5218	0.00126242	1.08101	0.756628	BSF	BSF	BSF
Tb427-080077400	1.7528	0.00839667	1.08087	0.641915	BSF	BSF	BSF
Tb427-070059100	2.47928	3.2468e-09	1.07909	0.164442	BSF	BSF	BSF
Tb427-110166600	1.65158	0.00947471	1.07857	0.462325	BSF	BSF	BSF
Tb427-080058400	1.91681	5.21206e-05	1.07638	0.432973	BSF	BSF	BSF
Tb427-040056300	1.53953	0.0038295	1.07263	0.369928	BSF	BSF	BSF
Tb427-070005500	1.53307	0.00153207	1.07205	0.452747	BSF	BSF	BSF
Tb427-070053300	1.59243	1.47729e-11	1.07047	0.383952	BSF	BSF	BSF
Tb427-060034200	3.72239	0.00835676	1.07014	0.67644	BSF	BSF	BSF
Tb427-040036800	1.62705	0.00650659	1.06963	0.738593	BSF	BSF	BSF
Tb427-040037600	1.97101	0.00035759	1.06873	0.708884	BSF	BSF	BSF
Tb427-010016900	1.82118	0.00046558	1.06761	0.210161	BSF	BSF	BSF
Tb427-030031200	1.61919	0.00290741	1.06708	0.488835	BSF	BSF	BSF
Tb427-000730800	1.75017	0.00396583	1.06678	0.400969	BSF	BSF	BSF
Tb427-050016100	1.51629	0.00209197	1.06229	0.484463	BSF	BSF	BSF
Tb427-100094400	2.20035	0.00769737	1.05859	0.798212	BSF	BSF	BSF
Tb427-080022300	2.50937	1.80658e-05	1.05796	0.727391	BSF	BSF	BSF
Tb427-040010000	1.88459	0.00511382	1.05665	0.802264	BSF	BSF	BSF
Tb427-090083000	1.52986	5.89744e-10	1.05531	0.181698	BSF	BSF	BSF
Tb427-070008100	1.93246	0.00967311	1.05441	0.79218	BSF	BSF	BSF
Tb427-110156500	1.59714	0.0089618	1.05437	0.607718	BSF	BSF	BSF
Tb427-030014200	1.64077	0.00531776	1.05399	0.739901	BSF	BSF	BSF
Tb427-050052400	1.93092	0.000693706	1.0513	0.745571	BSF	BSF	BSF
Tb427-000669000	7.08718	0.00327109	1.05013	0.935264	BSF	BSF	BSF
Tb427-060050100	1.54887	0.00283657	1.04974	0.506219	BSF	BSF	BSF
Tb427-030051000	1.66007	0.00471205	1.04933	0.519266	BSF	BSF	BSF
Tb427-070073100	1.73649	0.00535397	1.04924	0.652503	BSF	BSF	BSF
Tb427-110024600	1.79696	6.01445e-09	1.04661	0.0375614	BSF	BSF	BSF
Tb427-040054700	4.25035	0.00700255	1.0458	0.763553	BSF	BSF	BSF
Tb427-100058800	1.71474	0.00714291	1.04511	0.53021	BSF	BSF	BSF
Tb427-060020500	1.58085	0.00797183	1.04382	0.601595	BSF	BSF	BSF
Tb427-030043600	1.71129	1.15108e-11	1.04075	0.815253	BSF	BSF	BSF
Tb427-110149700	1.55543	0.00396583	1.03877	0.540472	BSF	BSF	BSF
Tb427-080054000	1.98807	0.00209561	1.03849	0.803352	BSF	BSF	BSF
Tb427-100139100	1.98221	0.00331126	1.0381	0.713784	BSF	BSF	BSF
Tb427-030023100:pseudogene	1.78919	0.00592533	1.03524	0.848538	BSF	BSF	BSF
Tb427-000014700	1.78292	2.26919e-15	1.03483	0.929799	BSF	BSF	BSF
Tb427-090077900	1.60487	6.48371e-11	1.03262	0.727391	BSF	BSF	BSF
Tb427-050026400:pseudogene	1.68375	0.000295858	1.03256	0.750794	BSF	BSF	BSF
Tb427-100155900	1.67371	0.00120441	1.03164	0.789522	BSF	BSF	BSF
Tb427-100057800	1.74228	3.59532e-05	1.02984	0.670356	BSF	BSF	BSF
Tb427-110170100	2.56297	1.67371e-07	1.02891	0.743867	BSF	BSF	BSF
Tb427-080039800	2.72213	0.0037205	1.02848	0.891277	BSF	BSF	BSF
Tb427-050016400	2.40595	1.30138e-08	1.02815	0.786685	BSF	BSF	BSF
Tb427-110172200	1.58114	0.00228427	1.02746	0.667485	BSF	BSF	BSF
Tb427-090035300	2.15257	0.00973143	1.0271	0.938795	BSF	BSF	BSF
Tb427-040009000	1.96233	8.8164e-09	1.02586	0.807556	BSF	BSF	BSF
Tb427-100015300	1.99302	0.00516151	1.02524	0.684518	BSF	BSF	BSF
Tb427-110131900	1.65437	0.00611398	1.02273	0.856189	BSF	BSF	BSF
Tb427-110186900	3.05914	0.00104221	1.02208	0.911499	BSF	BSF	BSF
Tb427-090066200	2.36695	7.83193e-41	1.0214	0.0467405	BSF	BSF	BSF
Tb427-100008500	3.57829	1.71087e-59	1.01954	0.890566	BSF	BSF	BSF
Tb427-080073800	1.58954	1.17026e-06	1.0171	0.497356	BSF	BSF	BSF
Tb427-110060300	1.68806	0.000136466	1.00998	0.721914	BSF	BSF	BSF
Tb427-080073600	1.52191	0.000511608	1.00966	0.981711	BSF	BSF	BSF
Tb427-030008300	1.55741	0.000828486	1.00881	0.918134	BSF	BSF	BSF
Tb427-080080900	4.29136	0.00116776	1.00687	0.975816	BSF	BSF	BSF
Tb427-000008600:pseudogene	4.45159	0.00844058	1.00389	0.99958	BSF	BSF	BSF
Tb427-100015600	2.49762	3.4439e-05	1.00309	0.97092	BSF	BSF	BSF
Tb427-080061700	2.96274	0.000284094	1.00006	0.999886	BSF	BSF	BSF
Tb427-030030600	1.42837	0.000356655	1.75805	6.77086e-13	PCF	both	both
Tb427-050016900	1.47258	0.000788531	1.73651	2.13753e-07	PCF	both	both
Tb427-100104600	1.49121	0.00535397	1.73185	2.56009e-09	PCF	both	both
Tb427-080072100	1.49401	9.95442e-05	1.66085	4.71914e-99	PCF	both	both
Tb427-040040600	1.49601	7.04373e-05	1.6013	2.78683e-12	PCF	both	both
Tb427-080032800	1.47693	0.00066395	1.59613	6.82978e-08	PCF	both	both
Tb427-030053200:pseudogene	1.34051	0.00758838	1.59173	1.53426e-34	PCF	both	both
Tb427-100015200	1.43261	2.12162e-05	1.58885	2.33334e-10	PCF	both	both
Tb427-050030400	1.4421	0.00114178	1.53983	6.11661e-07	PCF	both	both
Tb427-080052900	1.47683	5.58061e-06	1.53678	1.70904e-15	PCF	both	both
Tb427-100007300	1.48245	4.66704e-05	1.53318	1.77253e-12	PCF	both	both
Tb427-010031200	1.47766	8.40575e-06	1.51308	4.36886e-14	PCF	both	both
Tb427-060011900	1.42527	0.00210312	1.50282	2.50762e-14	PCF	both	both
Tb427-030045800	1.27649	0.00200122	1.50201	9.66134e-15	PCF	both	both
Tb427-110131400	1.41854	0.00622238	1.5017	1.26892e-11	PCF	both	both
Tb427-000660500	15.5446	0.224639	2.69908e+07	0.0060405	PCF	PCF	both
Tb427-000790100:pseudogene	7.94128	0.33061	69.2784	0.00726829	PCF	PCF	both
Tb427-000790300:pseudogene	2.6304e+12	0.67833	62.5411	0.00496273	PCF	PCF	both
Tb427-000630600:pseudogene	9.78843	0.0457506	16.3783	0.00268388	PCF	PCF	both
Tb427-000835000	13.2179	0.278129	13.3486	2.56497e-08	PCF	PCF	both
Tb427-010027800	6.18514	0.0546221	6.95339	0.000133998	PCF	PCF	both
Tb427-090033300	1.77522	0.713279	6.81602	0.000230914	PCF	PCF	both
Tb427-100007400	2.93801	0.0701983	6.58531	1.36554e-31	PCF	PCF	both
Tb427-000783200:pseudogene	2.13983	0.769266	6.1964	0.000177188	PCF	PCF	both
Tb427-090033900:pseudogene	9.36746	0.269654	6.1389	0.00686916	PCF	PCF	both
Tb427-000544800:pseudogene	2.81174	0.388066	6.01802	0.00884234	PCF	PCF	both
Tb427-090033800	3.39086	0.0524779	5.97576	6.5909e-13	PCF	PCF	both
Tb427-000744900:pseudogene	1.54255	0.781493	5.92997	2.11799e-09	PCF	PCF	both
Tb427-110101100	3.48975	0.0108324	5.75997	1.29942e-13	PCF	PCF	both
Tb427-000749100:pseudogene	1.77518	0.290861	5.29059	2.82975e-05	PCF	PCF	both
Tb427-000698200	2.38023	0.214037	5.12149	0.0019522	PCF	PCF	both
Tb427-100022600	1.93126	0.31605	4.63558	7.94026e-14	PCF	PCF	both
Tb427-040054900	2.51879	0.0157351	4.40502	3.61495e-18	PCF	PCF	both
Tb427-000348000:pseudogene	2.64025	0.0464639	4.30262	1.99872e-05	PCF	PCF	both
Tb427-000720800:pseudogene	6.25672	0.0164503	4.24098	0.00223876	PCF	PCF	both
Tb427-000799500:pseudogene	2.21287	0.270864	4.15514	8.43859e-23	PCF	PCF	both
Tb427-100094100	3.39529	0.329683	4.05188	0.00233758	PCF	PCF	both
Tb427-040027400	1.649	0.0746005	3.99027	1.48074e-12	PCF	PCF	both
Tb427-100096600	1.64546	0.011166	3.98919	8.4623e-34	PCF	PCF	both
Tb427-100133100:pseudogene	3.20179	0.191836	3.93355	2.94466e-07	PCF	PCF	both
Tb427-110048600	1.94538	0.0460822	3.74738	2.10655e-28	PCF	PCF	both
Tb427-000790800	3.07858	0.0913651	3.68731	0.000218497	PCF	PCF	both
Tb427-050041300	2.10532	0.248121	3.60338	1.56216e-12	PCF	PCF	both
Tb427-000769600	3.3749	0.219942	3.58484	0.00843993	PCF	PCF	both
Tb427-110047700	4.34623	0.0136733	3.55605	8.45273e-11	PCF	PCF	both
Tb427-000783500:pseudogene	2.61737	0.473653	3.49105	0.00270354	PCF	PCF	both
Tb427-040031800	2.2832	0.0304261	3.46479	9.34127e-12	PCF	PCF	both
Tb427-110184000	1.72789	0.161222	3.42755	5.3293e-08	PCF	PCF	both
Tb427-090055200	1.75435	0.0179751	3.39624	1.51206e-32	PCF	PCF	both
Tb427-070063900	1.70375	0.0172587	3.3932	5.08318e-26	PCF	PCF	both
Tb427-040007700	2.2773	0.0300409	3.36663	9.66134e-15	PCF	PCF	both
Tb427-100046500	4.36983	0.072342	3.22988	5.20602e-07	PCF	PCF	both
Tb427-040051200	1.50367	0.177602	3.08845	1.90573e-08	PCF	PCF	both
Tb427-080040500:pseudogene	56.6116	0.0230895	3.03266	0.00218712	PCF	PCF	both
Tb427-110037200:pseudogene	1.61298	0.647328	2.94051	0.00820361	PCF	PCF	both
Tb427-110169100	3.24512	0.0332528	2.92352	0.000234528	PCF	PCF	both
Tb427-000702800	2.00912	0.0620515	2.82961	0.00314681	PCF	PCF	both
Tb427-060044100	3.28791	0.0957131	2.82588	0.00689515	PCF	PCF	both
Tb427-050007600:pseudogene	1.67287	0.0108105	2.79109	8.45834e-10	PCF	PCF	both
Tb427-000766300:pseudogene	2.89687	0.099869	2.70908	9.63383e-09	PCF	PCF	both
Tb427-100086300	1.54857	0.494414	2.69365	0.000864074	PCF	PCF	both
Tb427-090033100	2.44138	0.0893175	2.66565	0.00336344	PCF	PCF	both
Tb427-100066900	2.91128	0.0205804	2.63718	0.00343212	PCF	PCF	both
Tb427-090021400	1.76463	0.118759	2.63425	5.93101e-06	PCF	PCF	both
Tb427-100060700	1.87996	0.0198007	2.60378	1.78328e-07	PCF	PCF	both
Tb427-070036700	1.70687	0.0252497	2.59104	8.43863e-12	PCF	PCF	both
Tb427-030056100	1.65433	0.094676	2.58602	2.74071e-08	PCF	PCF	both
Tb427-090059400	1.64887	0.0534594	2.5556	1.22837e-12	PCF	PCF	both
Tb427-110171800	1.9026	0.013854	2.52824	3.34982e-09	PCF	PCF	both
Tb427-100108900	1.79987	0.521918	2.46583	8.98653e-11	PCF	PCF	both
Tb427-110184600	1.53083	0.232939	2.42145	3.17253e-08	PCF	PCF	both
Tb427-070065600	1.9693	0.0413094	2.42028	3.48772e-09	PCF	PCF	both
Tb427-100115800	1.85487	0.419284	2.41189	0.00202674	PCF	PCF	both
Tb427-050037300	2.235	0.0215446	2.40821	5.10915e-13	PCF	PCF	both
Tb427-070025600	3.25581	0.0757781	2.4076	0.0047973	PCF	PCF	both
Tb427-090087500	1.72729	0.134548	2.40546	4.35218e-12	PCF	PCF	both
Tb427-070024100	2.19184	0.170096	2.35883	0.00466912	PCF	PCF	both
Tb427-100070800	1.83197	0.0191844	2.3485	2.87997e-09	PCF	PCF	both
Tb427-070030300	1.62173	0.0153933	2.3241	9.13864e-20	PCF	PCF	both
Tb427-110088200	2.37856	0.0476238	2.32216	1.21516e-06	PCF	PCF	both
Tb427-100108500	2.04073	0.0122897	2.30241	0.00970169	PCF	PCF	both
Tb427-110126600	1.70785	0.2302	2.28183	1.59491e-05	PCF	PCF	both
Tb427-100070200	1.82602	0.0870416	2.23797	9.19856e-06	PCF	PCF	both
Tb427-090036900	1.5002	0.233131	2.23689	5.05255e-08	PCF	PCF	both
Tb427-070073400	1.71923	0.0637285	2.22961	8.21969e-16	PCF	PCF	both
Tb427-100072800	1.56577	0.038549	2.21463	8.46568e-11	PCF	PCF	both
Tb427-100093900	1.76825	0.0142129	2.205	1.00956e-14	PCF	PCF	both
Tb427-080018500	2.59793	0.281298	2.18814	0.00114989	PCF	PCF	both
Tb427-110006100	2.42358	0.0394585	2.18459	9.53543e-05	PCF	PCF	both
Tb427-060008600:pseudogene	1.7135	0.390856	2.18045	2.88265e-08	PCF	PCF	both
Tb427-040021900	1.60684	0.128995	2.16869	1.68733e-05	PCF	PCF	both
Tb427-050045400	2.01654	0.011174	2.13509	1.76538e-06	PCF	PCF	both
Tb427-110019500	1.64728	0.137336	2.12551	1.38955e-06	PCF	PCF	both
Tb427-070057700	1.83281	0.0106754	2.12232	7.02096e-15	PCF	PCF	both
Tb427-090061200	1.93653	0.0557418	2.1203	1.82781e-12	PCF	PCF	both
Tb427-050017400	1.85157	0.0113603	2.09609	4.81864e-10	PCF	PCF	both
Tb427-050038300	2.22622	0.119832	2.08674	0.00629904	PCF	PCF	both
Tb427-100109100	1.70805	0.739545	2.08103	2.0272e-11	PCF	PCF	both
Tb427-100157200	2.64594	0.0173198	2.07505	0.000141213	PCF	PCF	both
Tb427-070036000	1.56898	0.174517	2.06401	2.21973e-12	PCF	PCF	both
Tb427-050033800	1.86801	0.0164764	2.03383	1.40238e-12	PCF	PCF	both
Tb427-100097000	1.56097	0.193372	2.02096	1.37094e-07	PCF	PCF	both
Tb427-100099300	1.68627	0.166921	2.01892	0.00152153	PCF	PCF	both
Tb427-080026000	1.68299	0.0204786	2.0178	5.47673e-10	PCF	PCF	both
Tb427-110011500	3.54782	0.0276083	2.01256	2.9109e-23	PCF	PCF	both
Tb427-110119800	1.93087	0.0300067	2.01152	0.000173879	PCF	PCF	both
Tb427-060050400	1.76305	0.0933244	2.01069	6.01772e-11	PCF	PCF	both
Tb427-070053900	1.56076	0.15645	2.00217	5.32607e-06	PCF	PCF	both
Tb427-080059100	2.50343	0.0794346	1.99865	4.1811e-05	PCF	PCF	both
Tb427-100086700	1.81851	0.0180112	1.99122	1.20335e-09	PCF	PCF	both
Tb427-110189300	2.03955	0.0515681	1.98981	6.52124e-13	PCF	PCF	both
Tb427-110056800	1.61682	0.23922	1.97876	0.000261021	PCF	PCF	both
Tb427-030040500	1.77811	0.0376633	1.97396	9.88517e-09	PCF	PCF	both
Tb427-110052200	1.6547	0.0605109	1.97367	0.000126212	PCF	PCF	both
Tb427-100059400	1.63475	0.10732	1.96391	3.27789e-07	PCF	PCF	both
Tb427-000107600:pseudogene	2.35879	0.17016	1.95118	6.46776e-06	PCF	PCF	both
Tb427-080066900	1.92531	0.0530438	1.92238	7.15034e-08	PCF	PCF	both
Tb427-060032600	2.25466	0.0623764	1.92085	0.00019659	PCF	PCF	both
Tb427-030022200	2.0638	0.247785	1.90304	0.00931648	PCF	PCF	both
Tb427-030059000	1.56568	0.0885994	1.90204	1.21241e-07	PCF	PCF	both
Tb427-070053600	2.11547	0.0671497	1.894	0.00532733	PCF	PCF	both
Tb427-100170200	2.15071	0.164852	1.89357	1.6766e-07	PCF	PCF	both
Tb427-040051800	2.08585	0.0183203	1.8792	8.61465e-10	PCF	PCF	both
Tb427-110041100	1.86357	0.0736113	1.87362	0.000134191	PCF	PCF	both
Tb427-110033700:pseudogene	2.7598	0.105194	1.87274	2.72407e-05	PCF	PCF	both
Tb427-110029300	1.73427	0.0157143	1.86845	2.21368e-06	PCF	PCF	both
Tb427-060014600	1.64252	0.0107226	1.8678	1.13049e-06	PCF	PCF	both
Tb427-030017200	1.6945	0.046731	1.86501	1.83117e-07	PCF	PCF	both
Tb427-100008300:pseudogene	1.60306	0.0961819	1.85651	5.71887e-12	PCF	PCF	both
Tb427-060047200	1.56863	0.0169417	1.85202	9.81825e-07	PCF	PCF	both
Tb427-070024900	2.25851	0.0484052	1.84991	0.00166821	PCF	PCF	both
Tb427-040010200	2.36413	0.0674621	1.84984	0.00498459	PCF	PCF	both
[truncated: 405 more rows]

## Sheet: CCR peak comparison
Common CCR using p value and FC are listed below. Average expression across each phase for BSF and PCF is given, along with the phase with the highest peak in each.
match peak? column shows is peak phae matches in both forms. PUF9 target indicated mRNA targets of PUF9 found by Archer et al 2009 (10.1371/journal.ppat.1000565)
gene	gene2	BSF_EG1	BSF_LG1	BSF_S	BSF_G2M	BSF_max	PCF_EG1	PCF_LG1	PCF_S	PCF_G2M	PCF_max	match peak?	PUF9 target?			Gene ID	source_id	Product Description	Input Ortholog(s)	Gene Name or Symbol	PCF peak	BSF peak
Tb427_030038800	Tb427-030038800	0.15256	0.131185	0.0505451	0.0655067	Early G1	0.175391	0.161611	0.101695	0.118495	Early G1	match	FALSE			Tb427_030006900	Tb427_030006900.1	WW domain/Zinc finger C-x8-C-x5-C-x3-H type (and similar), putative	Tb927.3.720	N/A	#N/A	#N/A
Tb427_040021400	Tb427-040021400	0.743992	0.642117	0.418236	0.390993	Early G1	1.61115	1.48931	0.838163	0.997492	Early G1	match	FALSE			Tb427_030007100	Tb427_030007100.1	Torus domain containing protein, putative	Tb927.3.740	N/A	#N/A	#N/A
Tb427_040052800	Tb427-040052800	0.351097	0.298044	0.206145	0.197544	Early G1	1.72264	1.87071	1.3439	1.15862	Late G1	no	FALSE			Tb427_030007600	Tb427_030007600.1	hypothetical protein, conserved	Tb927.3.790	N/A	#N/A	#N/A
Tb427_100132600	Tb427-100132600	0.219436	0.218642	0.167493	0.116684	Early G1	0.352141	0.398309	0.354292	0.34232	Late G1	no	FALSE			Tb427_030013100	Tb427_030013100.1	hypothetical protein, conserved	Tb927.3.1340	N/A	#N/A	#N/A
Tb427_100059200	Tb427-100059200	0.284222	0.247411	0.223984	0.252815	Early G1	0.333107	0.318747	0.325861	0.397492	G2M	no	FALSE			Tb427_030056000	Tb427_030056000.1	hypothetical protein, conserved	Tb927.3.5250	N/A	#N/A	#N/A
Tb427_110120100	Tb427-110120100	0.134796	0.105869	0.113974	0.122825	Early G1	0.342624	0.367976	0.34117	0.470219	G2M	no	FALSE			Tb427_040015400	Tb427_040015400.1	hypothetical protein, conserved	Tb927.4.1310	N/A	#N/A	#N/A
Tb427_090037700	Tb427-090037700	0.105538	0.0920598	0.0634291	0.062436	Early G1	0.227736	0.207857	0.193548	0.268339	G2M	no	FALSE			Tb427_050012900	Tb427_050012900.1	Zinc finger C-x8-C-x5-C-x3-H type (and similar), putative	Tb927.5.810	N/A	#N/A	#N/A
Tb427_090083800	Tb427-090083800	0.278997	0.27733	0.212091	0.181167	Early G1	0.545887	0.584784	0.474576	0.497806	Late G1	no	FALSE			Tb427_050021500	Tb427_050021500.1	Zinc finger C-x8-C-x5-C-x3-H type (and similar), putative	Tb927.5.1570	N/A	#N/A	#N/A
Tb427_110109100	Tb427-110109100	0.189133	0.146145	0.129832	0.156602	Early G1	0.522094	0.442069	0.462001	0.66395	G2M	no	FALSE			Tb427_050021600	Tb427_050021600.1	Zinc finger C-x8-C-x5-C-x3-H type (and similar)/CCCH-type zinc finger containing protein, putative	Tb927.5.1580	N/A	#N/A	#N/A
Tb427_000347900	Tb427-000347900	0.031348	0.0207135	0.0297324	0.0470829	G2M	0.0584636	0.0278468	0.0377255	0.0564263	Early G1	no	FALSE			Tb427_050050700	Tb427_050050700.1	Fip1 motif containing protein, putative	Tb927.5.4320	N/A	#N/A	#N/A
Tb427_030040300	Tb427-030040300	1.40752	1.10472	1.54212	1.7738	G2M	3.16927	1.66982	2.56643	4.34169	G2M	match	FALSE			Tb427_060039800	Tb427_060039800.1	Zinc finger C-x8-C-x5-C-x3-H type (and similar), putative	Tb927.6.3490	N/A	#N/A	#N/A
Tb427_060036300	Tb427-060036300	0.14838	0.135788	0.12884	0.239509	G2M	0.085656	0.0790651	0.0831055	0.11348	G2M	match	FALSE			Tb427_060045500	Tb427_060045500.1	Zinc finger C-x8-C-x5-C-x3-H type (and similar), putative	Tb927.6.4050	N/A	#N/A	#N/A
Tb427_090024800	Tb427-090024800	0.294671	0.301496	0.237859	0.314227	G2M	0.395649	0.275982	0.391471	0.465831	G2M	match	FALSE			Tb427_060052400	Tb427_060052400.1	Zinc finger C-x8-C-x5-C-x3-H type (and similar)/CCCH-type zinc finger containing protein, putative	Tb927.6.4720	N/A	#N/A	#N/A
Tb427_090036300	Tb427-090036300	0.200627	0.162255	0.233895	0.269191	G2M	0.278722	0.239682	0.324768	0.378056	G2M	match	FALSE			Tb427_060054600	Tb427_060054600.1	hypothetical protein, conserved	Tb927.6.4960	N/A	#N/A	#N/A
Tb427_100023700:pseudogene	Tb427-100023700:pseudogene	0.0731452	0.0840046	0.0872151	0.136131	G2M	0.4983	0.37991	0.422089	0.588088	G2M	match	FALSE			Tb427_070012900	Tb427_070012900.1	hypothetical protein, conserved	Tb927.7.930	N/A	#N/A	#N/A
Tb427_110181600	Tb427-110181600	0.326019	0.253165	0.439049	0.483112	G2M	1.02855	0.616609	0.955714	1.55611	G2M	match	FALSE			Tb427_070026000	Tb427_070026000.1	hypothetical protein, conserved	Tb927.7.2140	N/A	#N/A	#N/A
Tb427_060037900	Tb427-060037900	0.0950888	0.141542	0.156591	0.156602	G2M	0.139361	0.237195	0.242209	0.169906	S	no	FALSE			Tb427_070030300	Tb427_070030300.1	hypothetical protein, conserved	Tb927.7.2580	N/A	#N/A	#N/A
Tb427_100010600	Tb427-100010600	0.185998	0.278481	0.295342	0.296827	G2M	0.200544	0.330681	0.343357	0.273981	S	no	FALSE			Tb427_070031100	Tb427_070031100.1	hypothetical protein, conserved	Tb927.7.2660	N/A	#N/A	#N/A
Tb427_050046400	Tb427-050046400	0.0376176	0.0552359	0.0664024	0.0706244	G2M	0.0992522	0.181999	0.175506	0.152351	Late G1	no	FALSE			Tb427_070031200	Tb427_070031200.1	hypothetical protein, conserved	Tb927.7.2670	N/A	#N/A	#N/A
Tb427_080010200:pseudogene	Tb427-080010200:pseudogene	0.109718	0.119678	0.11893	0.119754	G2M	0.131883	0.186972	0.20503	0.162382	S	no	FALSE			Tb427_070031300	Tb427_070031300.1	hypothetical protein, conserved	Tb927.7.2680	N/A	#N/A	#N/A
Tb427_060041300	Tb427-060041300	0.108673	0.135788	0.205154	0.206755	G2M	0.0652617	0.120338	0.142701	0.104702	S	no	FALSE			Tb427_070055500	Tb427_070055500.1	CCCH-type zinc finger/Zinc finger C-x8-C-x5-C-x3-H type (and similar), putative	Tb927.7.4980	N/A	#N/A	#N/A
Tb427_040032200	Tb427-040032200	0.045977	0.0448792	0.0832507	0.0910952	G2M	0.0978926	0.141223	0.152542	0.116614	S	no	FALSE			Tb427_080045000	Tb427_080045000.1	hypothetical protein, conserved	Tb927.8.4020	N/A	#N/A	#N/A
Tb427_090030500	Tb427-090030500	0.0731452	0.0932106	0.115956	0.123849	G2M	0.111489	0.197414	0.217059	0.225078	G2M	match	FALSE			Tb427_080045500	Tb427_080045500.1	hypothetical protein, conserved	Tb927.8.4070	N/A	#N/A	#N/A
Tb427_100080200	Tb427-100080200	0.0961338	0.172612	0.189296	0.204708	G2M	0.193066	0.278468	0.336796	0.254545	S	no	FALSE			Tb427_080046000	Tb427_080046000.1	hypothetical protein, conserved	Tb927.8.4120	N/A	#N/A	#N/A
Tb427_110050600	Tb427-110050600	0.119122	0.181818	0.252725	0.255885	G2M	0.155676	0.216808	0.312739	0.251411	S	no	FALSE			Tb427_090020700	Tb427_090020700.1	Domain of unknown function (DUF1771)/Smr domain containing protein, putative	Tb927.9.3460	N/A	#N/A	#N/A
Tb427_110010300	Tb427-110010300	0.117032	0.136939	0.177403	0.185261	G2M	0.195785	0.242168	0.310005	0.30094	S	no	FALSE			Tb427_090053700	Tb427_090053700.1	Zinc finger C-x8-C-x5-C-x3-H type (and similar), putative	Tb927.9.9450	N/A	#N/A	#N/A
Tb427_040012300	Tb427-040012300	0.0292581	0.0253165	0.0406343	0.0440123	G2M	0.0530252	0.0616609	0.0831055	0.0934169	G2M	match	FALSE			Tb427_090053800	Tb427_090053800.1	CCCH-type zinc finger containing protein, putative	Tb927.9.9520	N/A	#N/A	#N/A
Tb427_100126200	Tb427-100126200	0.138976	0.163406	0.208127	0.209826	G2M	0.121006	0.165092	0.207217	0.166144	S	no	FALSE			Tb427_090058200	Tb427_090058200.1	hypothetical protein, conserved	Tb927.9.10280	N/A	#N/A	#N/A
Tb427_090062400	Tb427-090062400	0.236155	0.334868	0.317146	0.337769	G2M	0.28484	0.35455	0.420448	0.388715	S	no	FALSE			Tb427_090083800	Tb427_090083800.1	NLI interacting factor-like phosphatase, putative	Tb927.9.14120	N/A	Late G1	Early G1
Tb427_100023300	Tb427-100023300	0.0689655	0.0747986	0.136769	0.138178	G2M	0.174031	0.205868	0.301804	0.241379	S	no	FALSE			Tb427_100018400	Tb427_100018400.1	hypothetical protein, conserved	Tb927.10.1540	N/A	#N/A	#N/A
Tb427_090047400	Tb427-090047400	0.0532915	0.0494822	0.0832507	0.102354	G2M	0.112169	0.0949776	0.184254	0.187461	G2M	match	FALSE			Tb427_100037000	Tb427_100037000.1	Zinc knuckle, putative	Tb927.10.3200	N/A	#N/A	#N/A
Tb427_100052800	Tb427-100052800	0.0731452	0.0690449	0.102081	0.122825	G2M	0.127804	0.0934858	0.190268	0.170533	S	no	FALSE			Tb427_100055600	Tb427_100055600.1	hypothetical protein, conserved	Tb927.10.5150	N/A	#N/A	#N/A
Tb427_030039300	Tb427-030039300	0.077325	0.101266	0.14668	0.159672	G2M	0.130523	0.152163	0.249317	0.225078	S	no	FALSE			Tb427_100056600	Tb427_100056600.1	hypothetical protein, conserved	Tb927.10.5250	N/A	#N/A	#N/A
Tb427_020011600	Tb427-020011600	0.679206	0.529344	0.914767	1.03685	G2M	0.738953	0.653904	1.33024	1.14107	S	no	TRUE			Tb427_100095300	Tb427_100095300.1	A distinct subfamily of CDD/CDA-like deaminases, putative	Tb927.10.8850	N/A	#N/A	#N/A
Tb427_110132500	Tb427-110132500	0.185998	0.140391	0.219029	0.223132	G2M	0.112848	0.124814	0.202296	0.172414	S	no	FALSE			Tb427_100130700	Tb427_100130700.1	hypothetical protein, conserved	Tb927.10.12330	N/A	#N/A	#N/A
Tb427_110136400	Tb427-110136400	0.0480669	0.0575374	0.0733399	0.0747185	G2M	0.0639021	0.0626554	0.103882	0.0858934	S	no	FALSE			Tb427_100134800	Tb427_100134800.1	hypothetical protein, conserved	Tb927.10.12740	N/A	#N/A	#N/A
Tb427_080042700	Tb427-080042700	0.112853	0.0897583	0.170466	0.178096	G2M	0.224337	0.241671	0.392017	0.356113	S	no	FALSE			Tb427_100135000	Tb427_100135000.1	hypothetical protein, conserved	Tb927.10.12760	N/A	#N/A	#N/A
Tb427_110102400	Tb427-110102400	0.147335	0.177215	0.299306	0.32651	G2M	0.21414	0.224764	0.38819	0.353605	S	no	FALSE			Tb427_100135100	Tb427_100135100.1	hypothetical protein, conserved	Tb927.10.12780	N/A	#N/A	#N/A
Tb427_020006600	Tb427-020006600	0.118077	0.0747986	0.150644	0.163767	G2M	0.195785	0.194431	0.290869	0.290282	S	no	FALSE			Tb427_100157500	Tb427_100157500.1	hypothetical protein, conserved	Tb927.10.14930	N/A	#N/A	#N/A
Tb427_100023000	Tb427-100023000	0.149425	0.171461	0.241824	0.270215	G2M	0.238613	0.286425	0.392017	0.360502	S	no	FALSE			Tb427_100157600	Tb427_100157600.1	hypothetical protein, conserved	Tb927.10.14950	N/A	#N/A	#N/A
Tb427_050029600	Tb427-050029600	0.104493	0.0678941	0.127849	0.135107	G2M	0.186948	0.186474	0.286495	0.289655	G2M	match	FALSE			Tb427_110024600	Tb427_110024600.1	Zinc finger C-x8-C-x5-C-x3-H type (and similar)/CCCH-type zinc finger/Helicase conserved C-terminal domain containing protein, putative	Tb927.11.1980	N/A	#N/A	#N/A
Tb427_080017700	Tb427-080017700	0.0950888	0.0736479	0.131814	0.138178	G2M	0.167233	0.14371	0.260798	0.27837	G2M	match	FALSE			Tb427_110028600	Tb427_110028600.1	hypothetical protein, conserved	Tb927.11.2370	N/A	#N/A	#N/A
Tb427_020013000	Tb427-020013000	0.110763	0.125432	0.191278	0.208802	G2M	0.212101	0.262059	0.358119	0.329781	S	no	FALSE			Tb427_110080200	Tb427_110080200.1	HIT zinc finger containing protein, putative	Tb927.11.7450	N/A	#N/A	#N/A
Tb427_110072100	Tb427-110072100	0.0585162	0.0989643	0.12884	0.131013	G2M	0.101292	0.134759	0.193548	0.227586	G2M	match	FALSE			Tb427_110086100	Tb427_110086100.1	hypothetical protein, conserved	Tb927.11.7890	N/A	#N/A	#N/A
Tb427_070044600	Tb427-070044600	0.112853	0.120829	0.18335	0.208802	G2M	0.162475	0.206862	0.314379	0.291536	S	no	FALSE			Tb427_110092400	Tb427_110092400.1	Zinc finger C-x8-C-x5-C-x3-H type (and similar), putative	Tb927.11.8470	N/A	#N/A	#N/A
Tb427_040018500	Tb427-040018500	0.0909091	0.0828539	0.139742	0.140225	G2M	0.137322	0.132273	0.200656	0.181191	S	no	FALSE			Tb427_110144200	Tb427_110144200.1	CCCH-type zinc finger/Zinc knuckle, putative	Tb927.11.12750	N/A	#N/A	#N/A
Tb427_030019900	Tb427-030019900	0.0564263	0.0517837	0.169475	0.185261	G2M	0.118287	0.119841	0.33953	0.227586	S	no	FALSE			Tb427_110167900	Tb427_110167900.1	WW domain containing protein, putative	Tb927.11.14950	N/A	#N/A	#N/A
Tb427_070050000	Tb427-070050000	0.147335	0.217491	0.291378	0.295803	G2M	0.24881	0.290403	0.406233	0.37116	S	no	FALSE			Tb427_110185100	Tb427_110185100.1	Zinc finger C-x8-C-x5-C-x3-H type (and similar), putative	Tb927.11.16550	N/A	#N/A	#N/A
Tb427_040037200	Tb427-040037200	0.0961338	0.0736479	0.12884	0.194473	G2M	0.197825	0.181004	0.306178	0.372414	G2M	match	FALSE
Tb427_100138200	Tb427-100138200	0.171369	0.216341	0.237859	0.240532	G2M	0.293678	0.356539	0.440131	0.424451	S	no	FALSE
Tb427_110089900	Tb427-110089900	0.091954	0.100115	0.22002	0.275333	G2M	0.125085	0.176529	0.355932	0.342947	S	no	FALSE
Tb427_030045700	Tb427-030045700	0.189133	0.161105	0.22002	0.241556	G2M	0.314752	0.238687	0.394204	0.386207	S	no	FALSE
Tb427_070063200	Tb427-070063200	0.102403	0.0529344	0.20218	0.322416	G2M	0.126445	0.129289	0.264625	0.310345	G2M	match	FALSE
Tb427_110135400	Tb427-110135400	0.244514	0.275029	0.389495	0.399181	G2M	0.329708	0.374938	0.515582	0.481505	S	no	FALSE
Tb427_110120000	Tb427-110120000	0.131661	0.105869	0.148662	0.193449	G2M	0.127804	0.110393	0.190268	0.17931	S	no	FALSE
Tb427_090082600	Tb427-090082600	0.14629	0.204833	0.203171	0.23132	G2M	0.217539	0.271009	0.352105	0.352351	G2M	match	FALSE
Tb427_030030100	Tb427-030030100	0.128527	0.120829	0.2111	0.212897	G2M	0.188307	0.172054	0.260252	0.275862	G2M	match	FALSE
Tb427_080064800	Tb427-080064800	0.103448	0.103567	0.13776	0.142272	G2M	0.154317	0.188463	0.280481	0.269592	S	no	FALSE
Tb427_110103200	Tb427-110103200	0.105538	0.0690449	0.147671	0.184237	G2M	0.203263	0.185977	0.280481	0.332288	G2M	match	FALSE
Tb427_030024500	Tb427-030024500	0.267503	0.330265	0.538157	0.551689	G2M	0.556764	0.694182	0.975943	0.902821	S	no	FALSE
Tb427_060053400	Tb427-060053400	0.0877743	0.0621404	0.168484	0.290686	G2M	0.183549	0.180507	0.329142	0.408777	G2M	match	FALSE
Tb427_080041000	Tb427-080041000	0.212121	0.139241	0.420218	0.437052	G2M	0.259687	0.244157	0.473483	0.44953	S	no	FALSE
Tb427_100161500	Tb427-100161500	0.136886	0.266974	0.31219	0.317298	G2M	0.21482	0.276479	0.373428	0.322884	S	no	FALSE
Tb427_040013400	Tb427-040013400	0.129572	0.124281	0.168484	0.211873	G2M	0.165874	0.195425	0.27556	0.275235	S	no	FALSE
Tb427_030029500	Tb427-030029500	0.07628	0.13809	0.178394	0.212897	G2M	0.199184	0.24366	0.340623	0.376803	G2M	match	FALSE
Tb427_010028500	Tb427-010028500	0.171369	0.178366	0.287413	0.345957	G2M	0.271244	0.222775	0.381083	0.442006	G2M	match	FALSE
Tb427_100158000	Tb427-100158000	0.077325	0.0955121	0.170466	0.171955	G2M	0.145479	0.142218	0.224166	0.267712	G2M	match	FALSE
Tb427_080038700	Tb427-080038700	0.0626959	0.0632911	0.099108	0.134084	G2M	0.0795377	0.0820487	0.119738	0.117868	S	no	FALSE
Tb427_110030300	Tb427-110030300	0.312435	0.356732	0.526264	0.602866	G2M	0.350102	0.475883	0.639147	0.668339	G2M	match	FALSE
Tb427_110091400	Tb427-110091400	0.0971787	0.12313	0.274529	0.297851	G2M	0.218899	0.276977	0.519956	0.512226	S	no	FALSE
Tb427_100077200	Tb427-100077200	0.221526	0.344074	0.382557	0.470829	G2M	0.363018	0.577325	0.785128	0.740439	S	no	FALSE
Tb427_100125400	Tb427-100125400	0.118077	0.128884	0.168484	0.200614	G2M	0.165194	0.229239	0.261345	0.253918	S	no	FALSE
Tb427_040008600	Tb427-040008600	0.135841	0.125432	0.182359	0.184237	G2M	0.163834	0.20189	0.248223	0.252665	G2M	match	FALSE
Tb427_070080100	Tb427-070080100	0.0846395	0.0724971	0.157582	0.16172	G2M	0.152957	0.146693	0.223073	0.22884	G2M	match	FALSE
Tb427_020029700	Tb427-020029700	0.175549	0.134638	0.268583	0.381781	G2M	0.202583	0.173048	0.284855	0.35674	G2M	match	FALSE
Tb427_030057000	Tb427-030057000	0.132706	0.177215	0.302279	0.327533	G2M	0.254249	0.260567	0.561509	0.583072	G2M	match	FALSE
Tb427_040019500	Tb427-040019500	0.0783699	0.101266	0.152626	0.183214	G2M	0.147519	0.202884	0.258611	0.233229	S	no	FALSE
Tb427_090045800	Tb427-090045800	0.111808	0.105869	0.237859	0.251791	G2M	0.192386	0.213327	0.342264	0.322257	S	no	FALSE
Tb427_110123200	Tb427-110123200	0.109718	0.121979	0.226957	0.235415	G2M	0.232495	0.33267	0.463641	0.426959	S	no	FALSE
Tb427_100094600	Tb427-100094600	0.195402	0.287687	0.309217	0.333675	G2M	0.287559	0.380408	0.454893	0.420063	S	no	FALSE
Tb427_080088300	Tb427-080088300	0.259143	0.253165	0.386521	0.41044	G2M	0.0639021	0.0845351	0.101148	0.10721	G2M	match	FALSE
Tb427_040028600	Tb427-040028600	0.092999	0.0932106	0.138751	0.165814	G2M	0.174031	0.172054	0.285402	0.28652	G2M	match	FALSE
Tb427_010007200	Tb427-010007200	0.0741902	0.0713464	0.126858	0.137155	G2M	0.126445	0.140229	0.226353	0.220063	S	no	FALSE
Tb427_100138600	Tb427-100138600	0.0679206	0.0759494	0.086224	0.113613	G2M	0.114208	0.144704	0.193548	0.189342	S	no	FALSE
Tb427_110042200	Tb427-110042200	0.136886	0.162255	0.258672	0.282497	G2M	0.277362	0.336648	0.418808	0.489655	G2M	match	FALSE
Tb427_010033100	Tb427-010033100	0.00208986	0.00460299	0.00594648	0.00614125	G2M	0.00543848	0.00447539	0.0147622	0.0200627	G2M	match	FALSE
Tb427_110146500	Tb427-110146500	0.111808	0.0713464	0.194252	0.303992	G2M	0.118287	0.0890104	0.20667	0.297806	G2M	match	FALSE
Tb427_110120300	Tb427-110120300	0.0449321	0.0483314	0.0852329	0.0921187	G2M	0.0978926	0.104923	0.137233	0.157994	G2M	match	FALSE
Tb427_110120700	Tb427-110120700	0.295716	0.289988	0.518335	0.548618	G2M	0.39361	0.441571	0.683434	0.75047	G2M	match	FALSE
Tb427_100102600	Tb427-100102600	0.586207	0.52359	1.1893	1.28966	G2M	0.711081	0.633516	1.05741	1.27335	G2M	match	FALSE
Tb427_080055400	Tb427-080055400	0.0710554	0.0345224	0.207136	0.292733	G2M	0.109449	0.0745898	0.242756	0.327273	G2M	match	FALSE
Tb427_100058100	Tb427-100058100	0.124347	0.16916	0.191278	0.271238	G2M	0.154317	0.197911	0.270093	0.340439	G2M	match	FALSE
Tb427_080017800	Tb427-080017800	0.428422	0.388953	0.87116	0.974411	G2M	0.779742	0.700646	1.17441	1.32414	G2M	match	FALSE
Tb427_030042000	Tb427-030042000	0.0856844	0.0287687	0.125867	0.185261	G2M	0.0924541	0.0626554	0.1345	0.177429	G2M	match	FALSE
Tb427_020019900	Tb427-020019900	0.120167	0.166858	0.208127	0.212897	G2M	0.182189	0.227747	0.290323	0.287774	S	no	FALSE
Tb427_050025700	Tb427-050025700	0.0700104	0.0655926	0.144698	0.220061	G2M	0.133923	0.151666	0.216512	0.287147	G2M	match	FALSE
Tb427_080070700	Tb427-080070700	0.15674	0.130035	0.285431	0.315251	G2M	0.235214	0.186474	0.318753	0.367398	G2M	match	FALSE
Tb427_070056100	Tb427-070056100	0.0971787	0.0794016	0.136769	0.241556	G2M	0.171312	0.166087	0.299071	0.374295	G2M	match	FALSE
Tb427_110070300	Tb427-110070300	0.147335	0.103567	0.266601	0.385875	G2M	0.220258	0.167578	0.314379	0.411912	G2M	match	FALSE
Tb427_080023700	Tb427-080023700	0.532915	0.449942	0.661051	0.790174	G2M	0.254929	0.20736	0.359759	0.354859	S	no	FALSE
Tb427_100125300	Tb427-100125300	0.212121	0.164557	0.353816	0.401228	G2M	0.269205	0.23272	0.421542	0.603135	G2M	match	FALSE
Tb427_100153500	Tb427-100153500	0.174504	0.219793	0.243806	0.32958	G2M	0.293678	0.317752	0.437397	0.505956	G2M	match	FALSE
Tb427_110007000	Tb427-110007000	0.0658307	0.0621404	0.119921	0.152508	G2M	0.0829368	0.0880159	0.142701	0.153605	G2M	match	FALSE
Tb427_100153300	Tb427-100153300	0.332288	0.239356	0.802775	0.881269	G2M	0.327668	0.292392	0.600328	0.738558	G2M	match	FALSE
Tb427_110161600	Tb427-110161600	0.104493	0.0771001	0.20218	0.271238	G2M	0.132563	0.106912	0.283762	0.413793	G2M	match	FALSE
Tb427_110015300	Tb427-110015300	0.0741902	0.0747986	0.132805	0.151484	G2M	0.115568	0.0895077	0.162931	0.183072	G2M	match	FALSE
Tb427_090050200	Tb427-090050200	0.121212	0.111623	0.181368	0.278403	G2M	0.186948	0.213327	0.279388	0.35674	G2M	match	FALSE
Tb427_090058400	Tb427-090058400	0.477534	0.513234	0.657086	0.691914	G2M	1.1516	1.31079	1.86659	2.0558	G2M	match	FALSE
Tb427_070027800	Tb427-070027800	0.15465	0.134638	0.198216	0.249744	G2M	0.176751	0.170065	0.305631	0.333542	G2M	match	FALSE
Tb427_070027400	Tb427-070027400	0.0574713	0.0494822	0.0921705	0.105425	G2M	0.0849762	0.0800597	0.119738	0.128527	G2M	match	FALSE
Tb427_040005500	Tb427-040005500	0.167189	0.166858	0.249752	0.253838	G2M	0.339225	0.401293	0.510115	0.577429	G2M	match	FALSE
Tb427_110127600	Tb427-110127600	0.126437	0.127733	0.221011	0.278403	G2M	0.188307	0.176032	0.262438	0.375549	G2M	match	FALSE
Tb427_110045400	Tb427-110045400	0.145246	0.103567	0.203171	0.232344	G2M	0.123725	0.108901	0.18316	0.274608	G2M	match	FALSE
Tb427_110140900	Tb427-110140900	0.254963	0.205984	0.441031	0.546571	G2M	0.263086	0.235206	0.50082	0.543574	G2M	match	FALSE
Tb427_110030600	Tb427-110030600	0.176594	0.233602	0.333994	0.383828	G2M	0.252889	0.287916	0.372881	0.495298	G2M	match	FALSE
Tb427_080068000	Tb427-080068000	0.259143	0.253165	0.383548	0.408393	G2M	0.419443	0.401293	0.530344	0.623824	G2M	match	FALSE
Tb427_040050500	Tb427-040050500	0.318704	0.266974	0.756194	0.815763	G2M	0.369137	0.340129	0.5462	0.684013	G2M	match	FALSE
Tb427_090034200	Tb427-090034200	0.14629	0.135788	0.258672	0.353122	G2M	0.209381	0.239682	0.303991	0.360502	G2M	match	FALSE
Tb427_100063000	Tb427-100063000	0.140021	0.135788	0.193261	0.274309	G2M	0.273963	0.335157	0.406233	0.485266	G2M	match	FALSE
Tb427_100044200	Tb427-100044200	0.334378	0.202532	0.288404	0.432958	G2M	0.420122	0.319741	0.539639	0.677116	G2M	match	FALSE
Tb427_010024300	Tb427-010024300	0.167189	0.109321	0.179386	0.252815	G2M	0.254249	0.225261	0.299617	0.418182	G2M	match	FALSE
Tb427_110125400	Tb427-110125400	0.592476	0.525892	1.28345	1.29069	G2M	0.593474	0.651417	1.09349	1.22759	G2M	match	FALSE
Tb427_100134100	Tb427-100134100	0.310345	0.210587	0.632309	0.669396	G2M	0.246771	0.22178	0.439038	0.536677	G2M	match	FALSE
Tb427_050052200	Tb427-050052200	0.417973	0.38435	0.850347	0.885363	G2M	0.636302	0.64545	0.995626	1.1348	G2M	match	FALSE
Tb427_090025700	Tb427-090025700	0.322884	0.278481	0.427156	0.558854	G2M	0.341264	0.326703	0.503554	0.690909	G2M	match	FALSE
Tb427_020021100	Tb427-020021100	0.14629	0.148446	0.214073	0.298874	G2M	0.180829	0.159125	0.243302	0.343574	G2M	match	FALSE
Tb427_040019800	Tb427-040019800	0.0700104	0.0609896	0.108028	0.119754	G2M	0.134602	0.133267	0.168945	0.216928	G2M	match	FALSE
Tb427_070054300	Tb427-070054300	0.100313	0.118527	0.162537	0.223132	G2M	0.205982	0.235704	0.330235	0.401881	G2M	match	FALSE
Tb427_090059800	Tb427-090059800	0.180773	0.149597	0.322101	0.382805	G2M	0.339225	0.304326	0.470202	0.557994	G2M	match	FALSE
Tb427_100096100	Tb427-100096100	0.290491	0.216341	0.665015	0.871034	G2M	0.446635	0.346594	0.63532	0.905956	G2M	match	FALSE
Tb427_100011600	Tb427-100011600	0.539185	0.422325	0.809713	0.929376	G2M	0.705642	0.588265	0.895571	1.10846	G2M	match	FALSE
Tb427_100153200	Tb427-100153200	0.513062	0.395857	0.864222	1.04299	G2M	0.783141	0.679264	1.08639	1.3674	G2M	match	FALSE
Tb427_110167200	Tb427-110167200	0.318704	0.294591	0.758176	0.791198	G2M	0.380693	0.358528	0.623291	0.79373	G2M	match	FALSE
Tb427_100011800	Tb427-100011800	0.192268	0.100115	0.261645	0.441146	G2M	0.263086	0.188463	0.388737	0.668966	G2M	match	FALSE
Tb427_080072900	Tb427-080072900	0.579937	0.414269	1.15758	1.38383	G2M	0.797417	0.601193	1.16566	1.71912	G2M	match	FALSE
Tb427_110099200	Tb427-110099200	0.109718	0.102417	0.175421	0.184237	G2M	0.152277	0.194431	0.263532	0.280878	G2M	match	FALSE
Tb427_020008100	Tb427-020008100	0.453501	0.392405	0.705649	0.844422	G2M	1.32767	1.19294	1.7906	2.2558	G2M	match	FALSE
Tb427_100131700	Tb427-100131700	0.112853	0.1542	0.11893	0.159672	G2M	0.469069	0.488314	0.47403	0.629467	G2M	match	FALSE
Tb427_080061100	Tb427-080061100	0.173459	0.151899	0.237859	0.300921	G2M	0.304555	0.302834	0.388737	0.512853	G2M	match	FALSE
Tb427_030028100	Tb427-030028100	0.077325	0.0886076	0.0673935	0.0900716	G2M	0.255608	0.302834	0.265172	0.378683	G2M	match	FALSE
Tb427_040050400	Tb427-040050400	0.15883	0.0943613	0.372646	0.511771	G2M	0.274643	0.207857	0.423182	0.642633	G2M	match	FALSE
Tb427_100011500	Tb427-100011500	0.216301	0.157652	0.39445	0.504606	G2M	0.185588	0.162606	0.31766	0.497179	G2M	match	FALSE
Tb427_040023900	Tb427-040023900	0.0731452	0.0575374	0.102081	0.104401	G2M	0.122366	0.105917	0.150902	0.149843	S	no	FALSE
Tb427_100110000	Tb427-100110000	0.107628	0.101266	0.196234	0.204708	G2M	0.183549	0.224267	0.308365	0.32163	G2M	match	FALSE
Tb427_110082600	Tb427-110082600	0.184953	0.132336	0.242815	0.285568	G2M	0.312712	0.293884	0.421542	0.487147	G2M	match	FALSE
Tb427_110183300	Tb427-110183300	0.0888192	0.0897583	0.10109	0.126919	G2M	0.153637	0.142715	0.168945	0.226332	G2M	match	FALSE
Tb427_110169500	Tb427-110169500	0.960293	0.63061	1.5996	2.14227	G2M	1.34126	1.02089	1.58065	2.24451	G2M	match	FALSE
Tb427_110121400	Tb427-110121400	0.0982236	0.0678941	0.0981169	0.126919	G2M	0.137322	0.130283	0.176599	0.271473	G2M	match	FALSE
Tb427_030027300	Tb427-030027300	0.0428422	0.0322209	0.10109	0.140225	G2M	0.096533	0.0914968	0.171679	0.258307	G2M	match	FALSE
Tb427_070058100	Tb427-070058100	0.0950888	0.0840046	0.105055	0.122825	G2M	0.182869	0.159125	0.246583	0.271473	G2M	match	FALSE
Tb427_090079300	Tb427-090079300	0.091954	0.100115	0.0852329	0.104401	G2M	0.224337	0.266037	0.261892	0.351097	G2M	match	FALSE
Tb427_100161200	Tb427-100161200	1.04702	0.76985	1.62735	1.81474	G2M	1.54657	1.31328	2.07272	2.80502	G2M	match	FALSE
Tb427_110043800	Tb427-110043800	0.0971787	0.0932106	0.0971259	0.12999	G2M	0.24881	0.260567	0.233461	0.321003	G2M	match	FALSE
Tb427_110181700	Tb427-110181700	0.185998	0.104718	0.28444	0.286592	G2M	0.287559	0.23272	0.394751	0.426332	G2M	match	FALSE
Tb427_040025600	Tb427-040025600	0.351097	0.39931	0.299306	0.437052	G2M	0.611829	0.704127	0.611263	0.829467	G2M	match	FALSE
Tb427_100074000	Tb427-100074000	0.276907	0.199079	0.44995	0.65609	G2M	0.191027	0.145201	0.216512	0.253918	G2M	match	FALSE
Tb427_040046800:pseudogene	Tb427-040046800:pseudogene	0.143156	0.119678	0.209118	0.225179	G2M	0.208022	0.219294	0.322034	0.349216	G2M	match	FALSE
Tb427_100043800	Tb427-100043800	0.231975	0.1542	0.346878	0.456499	G2M	0.294358	0.227747	0.378349	0.537304	G2M	match	FALSE
Tb427_060020800:pseudogene	Tb427-060020800:pseudogene	0.772205	0.693901	0.897919	1.06141	G2M	0.767505	0.708603	0.902679	1.04075	G2M	match	FALSE
Tb427_070076500	Tb427-070076500	0.184953	0.269275	0.203171	0.287615	G2M	0.277362	0.346594	0.357026	0.386207	G2M	match	FALSE
Tb427_090070000	Tb427-090070000	0.202717	0.157652	0.180377	0.223132	G2M	0.288919	0.264048	0.297977	0.444514	G2M	match	FALSE
Tb427_020017500	Tb427-020017500	0.277952	0.346375	0.299306	0.367451	G2M	0.783141	0.78369	0.756698	1.07335	G2M	match	FALSE
Tb427_090058900	Tb427-090058900	0.292581	0.296893	0.244797	0.336745	G2M	0.815092	0.760318	0.734281	1.12727	G2M	match	FALSE
Tb427_100097100	Tb427-100097100	0.0877743	0.0609896	0.145689	0.24565	G2M	0.205303	0.168076	0.261345	0.377429	G2M	match	FALSE
Tb427_020017200	Tb427-020017200	0.100313	0.0794016	0.130823	0.156602	G2M	0.148199	0.121333	0.196282	0.217555	G2M	match	FALSE
Tb427_080054800	Tb427-080054800	0.135841	0.0863061	0.127849	0.212897	G2M	0.329708	0.2546	0.410607	0.615674	G2M	match	FALSE
Tb427_030046300	Tb427-030046300	0.115987	0.0701956	0.216056	0.220061	G2M	0.159075	0.119344	0.224166	0.262069	G2M	match	FALSE
Tb427_090045500	Tb427-090045500	0.173459	0.1542	0.17443	0.224156	G2M	0.439157	0.362506	0.454347	0.623824	G2M	match	FALSE
Tb427_070060100	Tb427-070060100	0.0856844	0.0886076	0.0961348	0.131013	G2M	0.135962	0.175535	0.167305	0.210031	G2M	match	FALSE
Tb427_030019600	Tb427-030019600	0.0846395	0.0678941	0.139742	0.144319	G2M	0.129844	0.125311	0.211591	0.229467	G2M	match	FALSE
Tb427_030028700	Tb427-030028700	0.0710554	0.0333717	0.0763132	0.117707	G2M	0.10537	0.107907	0.147622	0.259561	G2M	match	FALSE
Tb427_100162600	Tb427-100162600	0.159875	0.117376	0.163528	0.297851	G2M	0.274643	0.275982	0.330782	0.465831	G2M	match	FALSE
Tb427_100108100	Tb427-100108100	0.315569	0.283084	0.381566	0.564995	G2M	0.32019	0.328692	0.426463	0.581191	G2M	match	FALSE
Tb427_030059300	Tb427-030059300	0.197492	0.18527	0.185332	0.237462	G2M	0.474507	0.481353	0.407326	0.643887	G2M	match	FALSE
Tb427_090014600	Tb427-090014600	0.0804598	0.0782509	0.108028	0.140225	G2M	0.256288	0.212332	0.269546	0.365517	G2M	match	FALSE
Tb427_080044700	Tb427-080044700	0.157785	0.0978136	0.224975	0.37871	G2M	0.173351	0.162108	0.246036	0.394984	G2M	match	FALSE
Tb427_010013900	Tb427-010013900	0.420063	0.29229	0.379584	0.461617	G2M	0.341264	0.232223	0.320394	0.357367	G2M	match	FALSE
Tb427_010016500:pseudogene	Tb427-010016500:pseudogene	0.108673	0.0863061	0.135778	0.172979	G2M	0.218899	0.191944	0.23018	0.273354	G2M	match	FALSE
Tb427_010024600	Tb427-010024600	0.15256	0.118527	0.225966	0.331627	G2M	0.313392	0.238687	0.385457	0.4721	G2M	match	FALSE
Tb427_020031300	Tb427-020031300	0.104493	0.10817	0.145689	0.185261	G2M	0.182869	0.168573	0.263532	0.28652	G2M	match	FALSE
Tb427_030054100	Tb427-030054100	0.285266	0.296893	0.507433	0.515865	G2M	0.441876	0.453008	0.560416	0.666458	G2M	match	FALSE
Tb427_040010100	Tb427-040010100	0.0543365	0.0333717	0.0604559	0.0675537	G2M	0.0992522	0.0989557	0.138874	0.165517	G2M	match	FALSE
Tb427_040031600	Tb427-040031600	0.175549	0.142693	0.204163	0.275333	G2M	0.209381	0.184983	0.224166	0.343574	G2M	match	FALSE
Tb427_040032400	Tb427-040032400	0.134796	0.135788	0.236868	0.278403	G2M	0.209381	0.230234	0.326408	0.327273	G2M	match	FALSE
Tb427_040043300	Tb427-040043300	0.15047	0.140391	0.185332	0.249744	G2M	0.246091	0.265042	0.31602	0.378056	G2M	match	FALSE
Tb427_040052400	Tb427-040052400	0.481714	0.331415	0.572844	0.69089	G2M	0.488103	0.428145	0.671405	0.739185	G2M	match	FALSE
Tb427_060017700	Tb427-060017700	0.091954	0.0782509	0.133796	0.144319	G2M	0.135282	0.161611	0.187534	0.207524	G2M	match	FALSE
Tb427_060036500	Tb427-060036500	0.184953	0.127733	0.191278	0.202661	G2M	0.187627	0.184485	0.207217	0.262696	G2M	match	FALSE
Tb427_060043200	Tb427-060043200	0.182863	0.171461	0.243806	0.297851	G2M	0.263086	0.287916	0.353198	0.430094	G2M	match	FALSE
Tb427_070008200	Tb427-070008200	0.0825496	0.0736479	0.115956	0.123849	G2M	0.103331	0.0845351	0.109896	0.134796	G2M	match	FALSE
Tb427_070018300	Tb427-070018300	0.0647858	0.0552359	0.0822597	0.108495	G2M	0.152957	0.157633	0.179333	0.218809	G2M	match	FALSE
Tb427_070024000	Tb427-070024000	0.104493	0.0989643	0.191278	0.252815	G2M	0.193066	0.184983	0.256971	0.375549	G2M	match	FALSE
Tb427_070042400	Tb427-070042400	0.597701	0.43038	0.623389	0.67349	G2M	0.774983	0.630035	0.817933	0.929781	G2M	match	FALSE
Tb427_080005700	Tb427-080005700	0.117032	0.105869	0.141724	0.190379	G2M	0.304555	0.319244	0.43193	0.478997	G2M	match	FALSE
Tb427_080008000	Tb427-080008000	0.194357	0.131185	0.214073	0.287615	G2M	0.129844	0.117852	0.151996	0.20815	G2M	match	FALSE
Tb427_080034600	Tb427-080034600	0.0585162	0.0713464	0.0981169	0.128966	G2M	0.148199	0.149677	0.20667	0.247022	G2M	match	FALSE
Tb427_080038000	Tb427-080038000	0.0721003	0.0621404	0.0931615	0.126919	G2M	0.0924541	0.120338	0.149262	0.166144	G2M	match	FALSE
Tb427_080042000:pseudogene	Tb427-080042000:pseudogene	0.0992685	0.0978136	0.135778	0.185261	G2M	0.234534	0.203381	0.267906	0.335423	G2M	match	FALSE
Tb427_080048400	Tb427-080048400	0.0522466	0.0333717	0.0604559	0.0859775	G2M	0.0584636	0.0556937	0.0650629	0.0965517	G2M	match	FALSE
Tb427_080057400	Tb427-080057400	0.0574713	0.0494822	0.0842418	0.11566	G2M	0.130523	0.117355	0.168945	0.203135	G2M	match	FALSE
Tb427_080066600	Tb427-080066600	0.453501	0.382048	0.430129	0.564995	G2M	0.817131	0.744406	0.845271	1.04326	G2M	match	FALSE
Tb427_090042800	Tb427-090042800	0.125392	0.0874568	0.264618	0.383828	G2M	0.327668	0.252113	0.551668	0.681505	G2M	match	FALSE
Tb427_100008000	Tb427-100008000	0.0522466	0.0632911	0.0921705	0.0951894	G2M	0.0910945	0.0954749	0.126299	0.138558	G2M	match	FALSE
Tb427_100037200	Tb427-100037200	0.219436	0.124281	0.302279	0.34391	G2M	0.216179	0.171059	0.27392	0.323511	G2M	match	FALSE
Tb427_100037900	Tb427-100037900	0.0783699	0.0471807	0.0941526	0.123849	G2M	0.173351	0.139234	0.266812	0.296552	G2M	match	FALSE
Tb427_100048900	Tb427-100048900	0.130617	0.144994	0.226957	0.274309	G2M	0.242012	0.286922	0.401312	0.38558	S	no	FALSE
Tb427_100062000	Tb427-100062000	0.092999	0.132336	0.160555	0.160696	G2M	0.192386	0.186972	0.257518	0.291536	G2M	match	FALSE
Tb427_100063400	Tb427-100063400	0.0804598	0.0586881	0.10109	0.102354	G2M	0.169273	0.162606	0.220886	0.265204	G2M	match	FALSE
Tb427_100070700	Tb427-100070700	0.248694	0.258918	0.333003	0.376663	G2M	0.452753	0.401293	0.540186	0.635737	G2M	match	FALSE
Tb427_100117000	Tb427-100117000	0.14838	0.127733	0.229931	0.243603	G2M	0.276003	0.239682	0.388737	0.411285	G2M	match	FALSE
Tb427_100123100	Tb427-100123100	0.0961338	0.0989643	0.139742	0.200614	G2M	0.172672	0.144704	0.238382	0.254545	G2M	match	FALSE
Tb427_100132500	Tb427-100132500	0.218391	0.209436	0.212091	0.303992	G2M	0.266485	0.242168	0.249863	0.33605	G2M	match	FALSE
Tb427_100133500:pseudogene	Tb427-100133500:pseudogene	0.111808	0.0817031	0.107037	0.152508	G2M	0.172672	0.154649	0.20503	0.24953	G2M	match	FALSE
Tb427_100137300	Tb427-100137300	0.118077	0.1542	0.149653	0.165814	G2M	0.184228	0.195922	0.259705	0.272727	G2M	match	FALSE
Tb427_100143900	Tb427-100143900	0.0679206	0.0863061	0.120912	0.140225	G2M	0.138001	0.133267	0.176599	0.203135	G2M	match	FALSE
Tb427_100147400	Tb427-100147400	0.0992685	0.0989643	0.159564	0.181167	G2M	0.219579	0.213824	0.260252	0.334796	G2M	match	FALSE
Tb427_110071700	Tb427-110071700	0.109718	0.0759494	0.114965	0.169908	G2M	0.181509	0.171556	0.208311	0.265831	G2M	match	FALSE
Tb427_110074100	Tb427-110074100	0.0961338	0.103567	0.181368	0.198567	G2M	0.148878	0.17454	0.231821	0.252038	G2M	match	FALSE
Tb427_110085200	Tb427-110085200	0.479624	0.248562	0.390486	0.851586	G2M	0.35758	0.257086	0.282121	0.49906	G2M	match	FALSE
Tb427_110090700	Tb427-110090700	0.0647858	0.0667434	0.127849	0.12999	G2M	0.121006	0.141721	0.204483	0.205016	G2M	match	FALSE
Tb427_110100300	Tb427-110100300	0.0449321	0.0310702	0.0594648	0.0726714	G2M	0.0448674	0.0512183	0.0667031	0.0721003	G2M	match	FALSE
Tb427_110106500	Tb427-110106500	0.0741902	0.0747986	0.0911794	0.109519	G2M	0.123046	0.126803	0.17988	0.161755	S	no	FALSE
Tb427_110141100	Tb427-110141100	0.172414	0.174914	0.197225	0.237462	G2M	0.189667	0.193436	0.249863	0.279624	G2M	match	FALSE
Tb427_110154400	Tb427-110154400	0.219436	0.176064	0.285431	0.315251	G2M	0.28688	0.306315	0.422089	0.44953	G2M	match	FALSE
Tb427_110166500	Tb427-110166500	0.106583	0.0909091	0.139742	0.166837	G2M	0.117607	0.123819	0.184254	0.181818	S	no	FALSE
Tb427_030018800	Tb427-030018800	0.0971787	0.142693	0.102081	0.0962129	Late G1	0.172672	0.153158	0.138874	0.144201	Early G1	no	FALSE
Tb427_090042300	Tb427-090042300	0.293626	0.348677	0.279485	0.202661	Late G1	0.0720598	0.0482347	0.0481137	0.060815	Early G1	no	FALSE
Tb427_050026000	Tb427-050026000	0.105538	0.117376	0.0852329	0.0818833	Late G1	0.0876954	0.0974639	0.0694369	0.0708464	Late G1	match	FALSE
Tb427_040051900	Tb427-040051900	0.0585162	0.0690449	0.0386521	0.0522006	Late G1	0.17743	0.191944	0.079825	0.112226	Late G1	match	FALSE
Tb427_080035100	Tb427-080035100	0.214211	0.248562	0.103072	0.126919	Late G1	0.482665	0.51815	0.291963	0.324765	Late G1	match	FALSE
Tb427_110073800	Tb427-110073800	0.92999	0.955121	0.660059	0.691914	Late G1	1.46091	1.70462	1.32313	1.25204	Late G1	match	FALSE
Tb427_110016700	Tb427-110016700	0.0909091	0.189873	0.086224	0.087001	Late G1	0.161115	0.284436	0.0847458	0.104075	Late G1	match	FALSE
Tb427_090068200	Tb427-090068200	0.129572	0.258918	0.0872151	0.106448	Late G1	0.288919	0.403779	0.155823	0.20627	Late G1	match	FALSE
Tb427_050041600	Tb427-050041600	0.240334	0.514384	0.122894	0.128966	Late G1	0.592114	1	0.207764	0.284013	Late G1	match	FALSE
Tb427_100085500	Tb427-100085500	0.322884	0.499425	0.203171	0.187308	Late G1	0.863358	1.10592	0.468562	0.499687	Late G1	match	FALSE
Tb427_010023900	Tb427-010023900	0.647858	0.69275	0.302279	0.377687	Late G1	1.49558	1.66783	0.789502	0.941693	Late G1	match	FALSE
Tb427_090059900	Tb427-090059900	0.155695	0.203682	0.136769	0.134084	Late G1	0.252209	0.398309	0.195189	0.231348	Late G1	match	FALSE
Tb427_080085800	Tb427-080085800	0.110763	0.12313	0.0971259	0.11566	Late G1	0.0870156	0.106912	0.0677966	0.0877743	Late G1	match	FALSE
Tb427_070048700	Tb427-070048700	0.128527	0.192175	0.11893	0.106448	Late G1	0.260367	0.345102	0.178786	0.20627	Late G1	match	FALSE
Tb427_030050500	Tb427-030050500	0.265413	0.421174	0.190287	0.204708	Late G1	0.361659	0.43461	0.239475	0.24953	Late G1	match	FALSE
Tb427_070079700	Tb427-070079700	0.128527	0.21519	0.104063	0.103378	Late G1	0.201903	0.277474	0.131766	0.137931	Late G1	match	FALSE
Tb427_040054600	Tb427-040054600	0.149425	0.252014	0.086224	0.0818833	Late G1	0.293678	0.520139	0.161837	0.178683	Late G1	match	FALSE
Tb427_110055400	Tb427-110055400	0.104493	0.166858	0.0852329	0.0767656	Late G1	0.282801	0.286425	0.140514	0.12163	Late G1	match	FALSE
Tb427_070073300	Tb427-070073300	0.0668757	0.135788	0.0723489	0.073695	Late G1	0.144799	0.283938	0.131219	0.112226	Late G1	match	FALSE
Tb427_080078700	Tb427-080078700	0.0543365	0.0874568	0.0356789	0.0429887	Late G1	0.110129	0.176529	0.0956807	0.0934169	Late G1	match	FALSE
Tb427_110014200	Tb427-110014200	0.223615	0.559264	0.144698	0.159672	Late G1	0.276683	0.564396	0.188628	0.231975	Late G1	match	FALSE
Tb427_110167700	Tb427-110167700	0.14629	0.23015	0.119921	0.127943	Late G1	0.319511	0.631029	0.29415	0.276489	Late G1	match	FALSE
Tb427_060046000	Tb427-060046000	0.22884	0.403913	0.177403	0.152508	Late G1	0.481985	0.743411	0.340077	0.308464	Late G1	match	FALSE
Tb427_100128700	Tb427-100128700	0.0940439	0.18412	0.0723489	0.0706244	Late G1	0.131203	0.333665	0.0918535	0.0858934	Late G1	match	FALSE
Tb427_110050200	Tb427-110050200	0.14629	0.288838	0.113974	0.125896	Late G1	0.303875	0.426653	0.217059	0.216301	Late G1	match	FALSE
Tb427_100140400	Tb427-100140400	0.14629	0.163406	0.109019	0.139202	Late G1	0.281441	0.321233	0.22854	0.188088	Late G1	match	FALSE
Tb427_060056000	Tb427-060056000	0.109718	0.142693	0.0882061	0.0583419	Late G1	0.218899	0.288414	0.13778	0.132288	Late G1	match	FALSE
Tb427_100125900	Tb427-100125900	0.0679206	0.115075	0.0416254	0.0511771	Late G1	0.126445	0.197414	0.112083	0.11348	Late G1	match	FALSE
Tb427_100056100	Tb427-100056100	0.143156	0.228999	0.152626	0.12999	Late G1	0.441196	0.561412	0.429743	0.401254	Late G1	match	FALSE
Tb427_090030900	Tb427-090030900	0.252874	0.452244	0.122894	0.12999	Late G1	0.387492	0.853804	0.251504	0.258307	Late G1	match	FALSE
Tb427_090049200	Tb427-090049200	0.124347	0.258918	0.115956	0.0972364	Late G1	0.231135	0.468424	0.191908	0.154859	Late G1	match	FALSE
Tb427_070057600	Tb427-070057600	0.127482	0.162255	0.086224	0.0767656	Late G1	0.152957	0.182496	0.123565	0.110972	Late G1	match	FALSE
Tb427_100036400	Tb427-100036400	0.135841	0.245109	0.10109	0.0829069	Late G1	0.283481	0.519642	0.199016	0.186207	Late G1	match	FALSE
Tb427_110069200	Tb427-110069200	0.181818	0.478711	0.124876	0.134084	Late G1	0.354861	0.652909	0.224166	0.221317	Late G1	match	FALSE
Tb427_030041100	Tb427-030041100	0.110763	0.195627	0.0693756	0.0716479	Late G1	0.10673	0.15813	0.0978677	0.0746082	Late G1	match	FALSE
Tb427_100014200	Tb427-100014200	0.0877743	0.119678	0.0436075	0.0511771	Late G1	0.25017	0.188463	0.112083	0.0952978	Early G1	no	FALSE
Tb427_110139200	Tb427-110139200	0.0825496	0.139241	0.061447	0.0644831	Late G1	0.156356	0.240179	0.152542	0.130408	Late G1	match	FALSE
Tb427_090013700	Tb427-090013700	0.121212	0.226697	0.0921705	0.0972364	Late G1	0.211421	0.311785	0.151449	0.155486	Late G1	match	FALSE
Tb427_070081300	Tb427-070081300	0.0815047	0.118527	0.061447	0.0542477	Late G1	0.169952	0.199901	0.167305	0.159248	Late G1	match	FALSE
Tb427_050043800	Tb427-050043800	0.0449321	0.115075	0.0604559	0.0368475	Late G1	0.153637	0.419692	0.118644	0.0946708	Late G1	match	FALSE
Tb427_070076600	Tb427-070076600	0.223615	0.440736	0.198216	0.154555	Late G1	0.564242	0.742417	0.384363	0.407524	Late G1	match	FALSE
Tb427_100076000	Tb427-100076000	0.0491118	0.0978136	0.0515362	0.0696008	Late G1	0.0720598	0.153158	0.0716238	0.0677116	Late G1	match	FALSE
Tb427_110085800	Tb427-110085800	0.14629	0.288838	0.117939	0.116684	Late G1	0.277362	0.348583	0.237835	0.254545	Late G1	match	FALSE
Tb427_070045300	Tb427-070045300	0.15465	0.228999	0.0842418	0.101331	Late G1	0.289599	0.416211	0.186987	0.188715	Late G1	match	FALSE
Tb427_070079900	Tb427-070079900	0.103448	0.13809	0.109019	0.0900716	Late G1	0.224337	0.303332	0.224713	0.231975	Late G1	match	FALSE
Tb427_110167000	Tb427-110167000	0.0522466	0.0909091	0.0426165	0.0470829	Late G1	0.0659415	0.197414	0.0645161	0.0601881	Late G1	match	FALSE
Tb427_010009400	Tb427-010009400	0.0658307	0.130035	0.0455897	0.0726714	Late G1	0.17743	0.256589	0.0967742	0.119122	Late G1	match	FALSE
Tb427_080078900	Tb427-080078900	0.189133	0.301496	0.2111	0.144319	Late G1	0.380693	0.608155	0.411154	0.334169	Late G1	match	FALSE
Tb427_010012500	Tb427-010012500	0.138976	0.218642	0.154609	0.109519	Late G1	0.305235	0.445052	0.277201	0.261442	Late G1	match	FALSE
Tb427_080040200	Tb427-080040200	0.0804598	0.143843	0.0416254	0.0440123	Late G1	0.104011	0.179513	0.0612356	0.0545455	Late G1	match	FALSE
Tb427_060032700	Tb427-060032700	0.110763	0.20023	0.100099	0.0962129	Late G1	0.184908	0.301343	0.130126	0.166144	Late G1	match	FALSE
Tb427_100064300	Tb427-100064300	0.185998	0.372842	0.176412	0.160696	Late G1	0.303875	0.544505	0.232914	0.203135	Late G1	match	FALSE
Tb427_110132300	Tb427-110132300	0.077325	0.119678	0.0872151	0.0593654	Late G1	0.145479	0.248633	0.125205	0.126646	Late G1	match	FALSE
Tb427_070058700	Tb427-070058700	0.123302	0.18412	0.0941526	0.102354	Late G1	0.121006	0.262059	0.0945872	0.0902821	Late G1	match	FALSE
Tb427_110169200	Tb427-110169200	0.14629	0.266974	0.12884	0.154555	Late G1	0.348742	0.467429	0.27228	0.291536	Late G1	match	FALSE
Tb427_070028500	Tb427-070028500	0.23511	0.346375	0.194252	0.183214	Late G1	0.539769	0.843859	0.456534	0.417555	Late G1	match	FALSE
Tb427_060023400	Tb427-060023400	0.0982236	0.170311	0.0654113	0.0603889	Late G1	0.161115	0.248135	0.092947	0.0915361	Late G1	match	FALSE
Tb427_010005900	Tb427-010005900	0.0553814	0.0978136	0.0545094	0.0501535	Late G1	0.0863358	0.166087	0.0694369	0.0689655	Late G1	match	FALSE
Tb427_110095800	Tb427-110095800	0.0647858	0.0863061	0.049554	0.0501535	Late G1	0.116927	0.227747	0.101148	0.0852665	Late G1	match	FALSE
Tb427_080040400	Tb427-080040400	0.212121	0.624856	0.100099	0.11259	Late G1	0.395649	0.944804	0.24713	0.227586	Late G1	match	FALSE
Tb427_110037700	Tb427-110037700	0.188088	0.416571	0.149653	0.110542	Late G1	0.263766	0.530085	0.190268	0.163636	Late G1	match	FALSE
Tb427_080081200	Tb427-080081200	0.0721003	0.13809	0.0703667	0.0573183	Late G1	0.125085	0.293386	0.127392	0.134796	Late G1	match	FALSE
Tb427_100029200	Tb427-100029200	0.252874	0.278481	0.20218	0.224156	Late G1	0.405167	0.524615	0.498086	0.444514	Late G1	match	FALSE
Tb427_070059400:pseudogene	Tb427-070059400:pseudogene	0.192268	0.269275	0.163528	0.169908	Late G1	0.232495	0.420189	0.250957	0.231975	Late G1	match	FALSE
Tb427_110186200	Tb427-110186200	0.0940439	0.147296	0.086224	0.0839304	Late G1	0.147519	0.282944	0.115364	0.106583	Late G1	match	FALSE
Tb427_100097800	Tb427-100097800	0.0741902	0.102417	0.049554	0.0726714	Late G1	0.127124	0.248633	0.159103	0.122884	Late G1	match	FALSE
Tb427_100016400	Tb427-100016400	0.07628	0.120829	0.0822597	0.0614125	Late G1	0.104011	0.281452	0.145981	0.115987	Late G1	match	FALSE
Tb427_070053700	Tb427-070053700	0.0626959	0.104718	0.0485629	0.0450358	Late G1	0.0883753	0.167578	0.0727173	0.0721003	Late G1	match	FALSE
Tb427_070030100	Tb427-070030100	0.135841	0.165708	0.107037	0.110542	Late G1	0.2155	0.283938	0.243849	0.231348	Late G1	match	FALSE
Tb427_080043400	Tb427-080043400	0.144201	0.361335	0.147671	0.120778	Late G1	0.316111	0.860269	0.268453	0.216928	Late G1	match	FALSE
Tb427_070081200	Tb427-070081200	0.177638	0.257768	0.164519	0.156602	Late G1	0.552005	0.661363	0.556042	0.473981	Late G1	match	FALSE
Tb427_110132900	Tb427-110132900	0.0595611	0.110472	0.0673935	0.0532242	Late G1	0.118287	0.171556	0.111536	0.112226	Late G1	match	FALSE
Tb427_050012400	Tb427-050012400	0.454545	0.472957	0.354807	0.301945	Late G1	0.859279	1.06315	0.841443	0.662696	Late G1	match	FALSE
Tb427_100131800	Tb427-100131800	0.0721003	0.197929	0.0664024	0.0522006	Late G1	0.145479	0.36002	0.109349	0.0915361	Late G1	match	FALSE
Tb427_110073900	Tb427-110073900	0.107628	0.173763	0.112983	0.108495	Late G1	0.193746	0.308304	0.177693	0.166771	Late G1	match	FALSE
Tb427_110124500	Tb427-110124500	0.103448	0.202532	0.0644202	0.0808598	Late G1	0.232495	0.386872	0.164571	0.15047	Late G1	match	FALSE
Tb427_100026200	Tb427-100026200	0.130617	0.2313	0.131814	0.122825	Late G1	0.248131	0.533068	0.237835	0.225705	Late G1	match	FALSE
Tb427_090070900	Tb427-090070900	0.113898	0.210587	0.0842418	0.0798362	Late G1	0.186948	0.367976	0.171132	0.157994	Late G1	match	FALSE
Tb427_110055200	Tb427-110055200	0.0940439	0.298044	0.10109	0.107472	Late G1	0.151598	0.531079	0.15965	0.119749	Late G1	match	FALSE
Tb427_040026500	Tb427-040026500	0.114943	0.36939	0.180377	0.138178	Late G1	0.208022	0.615117	0.267359	0.188088	Late G1	match	FALSE
Tb427_110141400	Tb427-110141400	0.0647858	0.194476	0.0703667	0.0644831	Late G1	0.0972128	0.295375	0.117004	0.0909091	Late G1	match	FALSE
Tb427_090068500	Tb427-090068500	0.0825496	0.132336	0.0891972	0.0859775	Late G1	0.152957	0.233715	0.174412	0.16489	Late G1	match	FALSE
Tb427_090085200	Tb427-090085200	0.0585162	0.113924	0.0624381	0.04913	Late G1	0.0883753	0.288911	0.154729	0.104702	Late G1	match	FALSE
Tb427_100118400	Tb427-100118400	0.0700104	0.118527	0.0832507	0.0685773	Late G1	0.17743	0.281949	0.22854	0.156113	Late G1	match	FALSE
Tb427_080047200	Tb427-080047200	0.112853	0.316456	0.141724	0.134084	Late G1	0.203943	0.650423	0.231274	0.157994	Late G1	match	FALSE
Tb427_090077400	Tb427-090077400	0.0438871	0.0782509	0.0535183	0.0542477	Late G1	0.0774983	0.156638	0.079825	0.0714734	Late G1	match	FALSE
Tb427_100117300	Tb427-100117300	0.15674	0.269275	0.206145	0.174002	Late G1	0.272604	0.504227	0.32094	0.261442	Late G1	match	FALSE
Tb427_100152200	Tb427-100152200	0.138976	0.222094	0.151635	0.136131	Late G1	0.216859	0.362506	0.257518	0.209404	Late G1	match	FALSE
Tb427_050026800	Tb427-050026800	0.0543365	0.0920598	0.0426165	0.04913	Late G1	0.0781781	0.167578	0.0913067	0.0746082	Late G1	match	FALSE
Tb427_100050100:pseudogene	Tb427-100050100:pseudogene	0.0658307	0.127733	0.0931615	0.0716479	Late G1	0.172672	0.360517	0.189174	0.144828	Late G1	match	FALSE
Tb427_110167300	Tb427-110167300	0.0856844	0.161105	0.0634291	0.0726714	Late G1	0.1414	0.30184	0.121925	0.131034	Late G1	match	FALSE
Tb427_090029500	Tb427-090029500	0.106583	0.112773	0.0654113	0.0777892	Late G1	0.233855	0.328195	0.147622	0.163636	Late G1	match	FALSE
Tb427_110144100	Tb427-110144100	0.138976	0.32336	0.121903	0.11259	Late G1	0.205303	0.477872	0.190268	0.124138	Late G1	match	FALSE
Tb427_040030200	Tb427-040030200	0.0804598	0.103567	0.0535183	0.0747185	Late G1	0.222978	0.202884	0.100601	0.0990596	Early G1	no	FALSE
Tb427_050031400	Tb427-050031400	0.301985	0.391254	0.243806	0.278403	Late G1	0.380014	0.497762	0.370148	0.383699	Late G1	match	FALSE
Tb427_070080900	Tb427-070080900	0.0846395	0.165708	0.0703667	0.0450358	Late G1	0.150238	0.26007	0.101695	0.0996865	Late G1	match	FALSE
Tb427_090071900	Tb427-090071900	0.112853	0.197929	0.0763132	0.0829069	Late G1	0.170632	0.234212	0.126299	0.137931	Late G1	match	FALSE
Tb427_110134700	Tb427-110134700	0.0940439	0.220944	0.138751	0.102354	Late G1	0.18015	0.304823	0.167851	0.137931	Late G1	match	FALSE
Tb427_090015100	Tb427-090015100	0.187043	0.250863	0.162537	0.162743	Late G1	0.235214	0.345599	0.258611	0.247022	Late G1	match	FALSE
Tb427_100105200	Tb427-100105200	0.134796	0.350978	0.143707	0.134084	Late G1	0.297077	0.717553	0.310005	0.223824	Late G1	match	FALSE
Tb427_070062300	Tb427-070062300	0.0491118	0.133487	0.0584737	0.0481064	Late G1	0.0876954	0.293386	0.079825	0.0827586	Late G1	match	FALSE
Tb427_110102600	Tb427-110102600	0.0428422	0.0840046	0.0396432	0.0337769	Late G1	0.0530252	0.173545	0.0579552	0.0514107	Late G1	match	FALSE
Tb427_070010600	Tb427-070010600	0.0532915	0.0955121	0.049554	0.0276356	Late G1	0.0754589	0.202884	0.0781848	0.0739812	Late G1	match	FALSE
Tb427_090006600	Tb427-090006600	0.14838	0.252014	0.163528	0.12999	Late G1	0.308634	0.548981	0.232367	0.243887	Late G1	match	FALSE
Tb427_050034300	Tb427-050034300	0.109718	0.352129	0.0951437	0.0921187	Late G1	0.240653	0.743411	0.281575	0.16489	Late G1	match	FALSE
Tb427_110154700	Tb427-110154700	0.112853	0.225547	0.169475	0.132037	Late G1	0.229776	0.386872	0.268999	0.222571	Late G1	match	FALSE
Tb427_100108200	Tb427-100108200	0.0846395	0.186421	0.0921705	0.0798362	Late G1	0.140041	0.326206	0.144341	0.0959248	Late G1	match	FALSE
Tb427_110180600	Tb427-110180600	0.0825496	0.132336	0.074331	0.0900716	Late G1	0.167233	0.300348	0.170038	0.173668	Late G1	match	FALSE
Tb427_060044700	Tb427-060044700	0.0491118	0.143843	0.086224	0.0726714	Late G1	0.10673	0.213327	0.148715	0.132915	Late G1	match	FALSE
Tb427_080009600	Tb427-080009600	0.0292581	0.135788	0.0346878	0.0286592	Late G1	0.0231135	0.181502	0.0338983	0.0263323	Late G1	match	FALSE
Tb427_000636500:pseudogene	Tb427-000636500:pseudogene	0.0449321	0.0460299	0.0297324	0.0163767	Late G1	0.133923	0.126305	0.0727173	0.077116	Early G1	no	FALSE
Tb427_070008300	Tb427-070008300	0.0752351	0.0955121	0.0515362	0.0522006	Late G1	0.122366	0.276479	0.125205	0.11348	Late G1	match	FALSE
Tb427_110120200	Tb427-110120200	0.147335	0.2313	0.19227	0.168884	Late G1	0.176751	0.313774	0.221432	0.19373	Late G1	match	FALSE
Tb427_080028700	Tb427-080028700	0.486938	1.67664	0.478692	0.37871	Late G1	1.04623	3.15316	1.0164	0.589969	Late G1	match	FALSE
Tb427_060035500	Tb427-060035500	0.132706	0.223245	0.12884	0.113613	Late G1	0.191027	0.355545	0.209404	0.145455	Late G1	match	FALSE
Tb427_030013900	Tb427-030013900	0.161964	0.225547	0.152626	0.121801	Late G1	0.205982	0.408255	0.231274	0.181191	Late G1	match	FALSE
Tb427_010030000	Tb427-010030000	0.135841	0.350978	0.215064	0.158649	Late G1	0.201224	0.530582	0.29415	0.201254	Late G1	match	FALSE
Tb427_090085500	Tb427-090085500	0.0992685	0.23015	0.122894	0.0941658	Late G1	0.261047	0.452511	0.290323	0.194357	Late G1	match	FALSE
Tb427_050016600	Tb427-050016600	0.105538	0.166858	0.11893	0.119754	Late G1	0.192386	0.374938	0.232367	0.211912	Late G1	match	FALSE
Tb427_050039100	Tb427-050039100	0.175549	0.275029	0.184341	0.149437	Late G1	0.266485	0.429637	0.259705	0.256426	Late G1	match	FALSE
Tb427_110138200	Tb427-110138200	0.140021	0.467204	0.0961348	0.0665302	Late G1	0.369137	0.89458	0.284855	0.196865	Late G1	match	FALSE
Tb427_080009800	Tb427-080009800	0.15883	0.629459	0.11893	0.148414	Late G1	0.163154	1.05072	0.202296	0.168652	Late G1	match	FALSE
Tb427_040025200	Tb427-040025200	0.061651	0.139241	0.0763132	0.0757421	Late G1	0.0795377	0.225758	0.102242	0.0714734	Late G1	match	FALSE
Tb427_020019300	Tb427-020019300	0.0710554	0.132336	0.0842418	0.0829069	Late G1	0.10809	0.203879	0.130126	0.115361	Late G1	match	FALSE
Tb427_060034100	Tb427-060034100	0.131661	0.324511	0.123885	0.106448	Late G1	0.233855	0.512183	0.285949	0.213166	Late G1	match	FALSE
Tb427_030028200	Tb427-030028200	0.0940439	0.225547	0.099108	0.0829069	Late G1	0.163834	0.346594	0.211044	0.15047	Late G1	match	FALSE
Tb427_080054300	Tb427-080054300	0.0334378	0.0920598	0.049554	0.037871	Late G1	0.10537	0.251119	0.106616	0.0858934	Late G1	match	FALSE
Tb427_020017400	Tb427-020017400	0.0574713	0.120829	0.0763132	0.0542477	Late G1	0.0938137	0.219791	0.115364	0.114107	Late G1	match	FALSE
Tb427_040037500	Tb427-040037500	0.0982236	0.159954	0.148662	0.120778	Late G1	0.200544	0.34908	0.219792	0.183699	Late G1	match	FALSE
Tb427_110028000	Tb427-110028000	0.0564263	0.10817	0.074331	0.0532242	Late G1	0.0509857	0.16907	0.082012	0.0507837	Late G1	match	FALSE
Tb427_050025500	Tb427-050025500	0.108673	0.151899	0.11001	0.114637	Late G1	0.169273	0.310791	0.199016	0.16489	Late G1	match	FALSE
Tb427_070080800	Tb427-070080800	0.0658307	0.147296	0.049554	0.0685773	Late G1	0.173351	0.244654	0.118644	0.11348	Late G1	match	FALSE
Tb427_070037000	Tb427-070037000	0.215256	0.304948	0.209118	0.195496	Late G1	0.313392	0.50721	0.310005	0.27837	Late G1	match	FALSE
Tb427_070058900	Tb427-070058900	0.0846395	0.362486	0.0832507	0.0696008	Late G1	0.146839	0.671805	0.185894	0.110345	Late G1	match	FALSE
Tb427_050046900	Tb427-050046900	0.136886	0.208285	0.145689	0.0992835	Late G1	0.0951734	0.131278	0.0869328	0.0965517	Late G1	match	FALSE
Tb427_100018300	Tb427-100018300	0.0637409	0.116226	0.03667	0.0409417	Late G1	0.132563	0.264545	0.145981	0.121003	Late G1	match	FALSE
Tb427_040033800	Tb427-040033800	0.0825496	0.149597	0.12884	0.101331	Late G1	0.164514	0.226256	0.225806	0.222571	Late G1	match	FALSE
Tb427_110064800	Tb427-110064800	0.0344828	0.0851554	0.0307235	0.04913	Late G1	0.096533	0.208354	0.0902132	0.0633229	Late G1	match	FALSE
Tb427_050036200	Tb427-050036200	0.0909091	0.181818	0.0812686	0.062436	Late G1	0.166553	0.355047	0.220886	0.140439	Late G1	match	FALSE
Tb427_110141300	Tb427-110141300	0.0428422	0.0667434	0.03667	0.0470829	Late G1	0.067981	0.120835	0.0765446	0.0645768	Late G1	match	FALSE
Tb427_100031200	Tb427-100031200	0.0585162	0.0989643	0.0802775	0.0726714	Late G1	0.127804	0.27449	0.155823	0.104702	Late G1	match	FALSE
Tb427_090028700	Tb427-090028700	0.0438871	0.130035	0.061447	0.0562948	Late G1	0.104691	0.253108	0.145981	0.111599	Late G1	match	FALSE
Tb427_080068700	Tb427-080068700	0.216301	0.295742	0.171457	0.152508	Late G1	0.363018	0.453008	0.279934	0.208777	Late G1	match	FALSE
Tb427_110094400	Tb427-110094400	0.091954	0.220944	0.127849	0.120778	Late G1	0.127804	0.34361	0.16129	0.134169	Late G1	match	FALSE
Tb427_050015100	Tb427-050015100	0.0449321	0.0955121	0.0396432	0.0481064	Late G1	0.101292	0.146693	0.11263	0.101567	Late G1	match	FALSE
Tb427_070060500	Tb427-070060500	0.0783699	0.386651	0.0901883	0.0644831	Late G1	0.148878	0.721034	0.23018	0.0965517	Late G1	match	FALSE
Tb427_040009800	Tb427-040009800	0.0825496	0.189873	0.0961348	0.0849539	Late G1	0.144799	0.277474	0.168945	0.118495	Late G1	match	FALSE
Tb427_110144500	Tb427-110144500	0.0344828	0.133487	0.0545094	0.0388946	Late G1	0.0686608	0.225261	0.0634226	0.0507837	Late G1	match	FALSE
Tb427_100165000	Tb427-100165000	0.0606061	0.142693	0.0773043	0.0511771	Late G1	0.0904147	0.24913	0.0940405	0.0658307	Late G1	match	FALSE
Tb427_110056400	Tb427-110056400	0.0606061	0.177215	0.0634291	0.0665302	Late G1	0.0686608	0.220288	0.141607	0.0783699	Late G1	match	FALSE
Tb427_060051900	Tb427-060051900	0.322884	0.883774	0.226957	0.170931	Late G1	0.57308	1.32074	0.496446	0.398746	Late G1	match	FALSE
Tb427_100084400	Tb427-100084400	0.0804598	0.111623	0.106046	0.0921187	Late G1	0.0876954	0.153655	0.13778	0.0965517	Late G1	match	FALSE
Tb427_100056700	Tb427-100056700	0.0909091	0.217491	0.153617	0.09826	Late G1	0.125765	0.283441	0.198469	0.139812	Late G1	match	FALSE
Tb427_100078600	Tb427-100078600	0.0595611	0.124281	0.0545094	0.0419652	Late G1	0.101971	0.269518	0.129579	0.0865204	Late G1	match	FALSE
Tb427_110103400	Tb427-110103400	0.0679206	0.150748	0.105055	0.0583419	Late G1	0.057104	0.306813	0.160197	0.0664577	Late G1	match	FALSE
Tb427_090062200	Tb427-090062200	0.077325	0.124281	0.0852329	0.100307	Late G1	0.140721	0.232223	0.157463	0.134169	Late G1	match	FALSE
Tb427_100083900	Tb427-100083900	0.0710554	0.210587	0.11001	0.09826	Late G1	0.166553	0.411735	0.211044	0.152351	Late G1	match	FALSE
Tb427_080069900	Tb427-080069900	0.112853	0.173763	0.115956	0.100307	Late G1	0.235214	0.362506	0.213778	0.201254	Late G1	match	FALSE
Tb427_010032000	Tb427-010032000	0.0825496	0.116226	0.0535183	0.0583419	Late G1	0.0870156	0.231726	0.119738	0.0858934	Late G1	match	FALSE
Tb427_110138400	Tb427-110138400	0.0721003	0.13809	0.0891972	0.0829069	Late G1	0.119646	0.217305	0.159103	0.0971787	Late G1	match	FALSE
Tb427_110164800	Tb427-110164800	0.107628	0.199079	0.107037	0.0880246	Late G1	0.210061	0.413725	0.249863	0.165517	Late G1	match	FALSE
Tb427_050010000	Tb427-050010000	0.0835946	0.173763	0.114965	0.0972364	Late G1	0.186268	0.335157	0.236741	0.176803	Late G1	match	FALSE
Tb427_100136700	Tb427-100136700	0.122257	0.319908	0.130823	0.110542	Late G1	0.21482	0.460965	0.241115	0.161129	Late G1	match	FALSE
Tb427_090059100	Tb427-090059100	0.159875	0.299194	0.163528	0.134084	Late G1	0.237933	0.452511	0.264625	0.213166	Late G1	match	FALSE
Tb427_100036200	Tb427-100036200	0.0543365	0.0989643	0.0644202	0.0317298	Late G1	0.0876954	0.257583	0.151449	0.0871473	Late G1	match	FALSE
Tb427_070065100	Tb427-070065100	0.0449321	0.0943613	0.0564916	0.0440123	Late G1	0.096533	0.2546	0.150902	0.0978056	Late G1	match	FALSE
Tb427_040025000	Tb427-040025000	0.120167	0.298044	0.149653	0.120778	Late G1	0.247451	0.446047	0.313833	0.236991	Late G1	match	FALSE
Tb427_050052300	Tb427-050052300	0.015674	0.0794016	0.0297324	0.0163767	Late G1	0.0530252	0.13824	0.0579552	0.0394984	Late G1	match	FALSE
Tb427_080059400	Tb427-080059400	0.0752351	0.150748	0.0773043	0.0593654	Late G1	0.162475	0.323222	0.162931	0.131034	Late G1	match	FALSE
Tb427_080053900	Tb427-080053900	0.14629	0.258918	0.169475	0.134084	Late G1	0.300476	0.503232	0.378896	0.270846	Late G1	match	FALSE
Tb427_090009100	Tb427-090009100	0.0626959	0.10817	0.0555005	0.0706244	Late G1	0.146159	0.309299	0.162384	0.13605	Late G1	match	FALSE
Tb427_060035700	Tb427-060035700	0.0689655	0.10702	0.0733399	0.062436	Late G1	0.0836166	0.163103	0.0814653	0.0727273	Late G1	match	FALSE
Tb427_090039700	Tb427-090039700	0.0522466	0.128884	0.061447	0.0593654	Late G1	0.057104	0.209846	0.122471	0.0626959	Late G1	match	FALSE
Tb427_100120400	Tb427-100120400	0.317659	0.848101	0.360753	0.242579	Late G1	0.745071	1.69717	0.787315	0.523511	Late G1	match	FALSE
Tb427_010020500	Tb427-010020500	0.291536	0.712313	0.34886	0.357216	Late G1	0.492862	1.17106	0.579552	0.531661	Late G1	match	FALSE
Tb427_110121900	Tb427-110121900	0.444096	0.701956	0.368682	0.321392	Late G1	0.624745	0.974142	0.568617	0.515361	Late G1	match	FALSE
Tb427_010022700	Tb427-010022700	0.22675	0.361335	0.157582	0.127943	Late G1	0.478586	0.712084	0.47895	0.388715	Late G1	match	FALSE
Tb427_110038000	Tb427-110038000	0.0909091	0.193326	0.121903	0.120778	Late G1	0.195785	0.337643	0.20175	0.15047	Late G1	match	FALSE
Tb427_100046000	Tb427-100046000	0.155695	0.201381	0.166501	0.116684	Late G1	0.222978	0.387369	0.273373	0.226332	Late G1	match	FALSE
Tb427_100016600:pseudogene	Tb427-100016600:pseudogene	0.0647858	0.303797	0.0941526	0.0747185	Late G1	0.096533	0.472402	0.175506	0.0789969	Late G1	match	FALSE
Tb427_060012400	Tb427-060012400	0.0564263	0.110472	0.0634291	0.0716479	Late G1	0.0985724	0.264545	0.13942	0.0758621	Late G1	match	FALSE
Tb427_100125800	Tb427-100125800	0.0491118	0.111623	0.0654113	0.0593654	Late G1	0.10673	0.252113	0.173319	0.124765	Late G1	match	FALSE
Tb427_050013100	Tb427-050013100	0.0961338	0.202532	0.119921	0.0788127	Late G1	0.155676	0.393337	0.193002	0.137931	Late G1	match	FALSE
Tb427_080021800	Tb427-080021800	0.0553814	0.125432	0.0654113	0.0634596	Late G1	0.053705	0.225758	0.1345	0.0752351	Late G1	match	FALSE
Tb427_110089800	Tb427-110089800	0.211076	0.43153	0.184341	0.12999	Late G1	0.242692	0.448533	0.224166	0.198746	Late G1	match	FALSE
Tb427_100170300	Tb427-100170300	0.0334378	0.241657	0.0376611	0.0399181	Late G1	0.0509857	0.427648	0.112083	0.0601881	Late G1	match	FALSE
Tb427_080036300	Tb427-080036300	0.0856844	0.144994	0.0981169	0.0839304	Late G1	0.167913	0.291397	0.233461	0.14232	Late G1	match	FALSE
Tb427_100095000	Tb427-100095000	0.202717	0.413119	0.245788	0.193449	Late G1	0.409925	0.736947	0.422089	0.287147	Late G1	match	FALSE
Tb427_030028500	Tb427-030028500	0.0679206	0.194476	0.0921705	0.0675537	Late G1	0.10673	0.294381	0.165664	0.0940439	Late G1	match	FALSE
Tb427_110180800	Tb427-110180800	0.0710554	0.131185	0.0882061	0.073695	Late G1	0.144799	0.296867	0.172772	0.117868	Late G1	match	FALSE
Tb427_070027700	Tb427-070027700	0.0950888	0.181818	0.149653	0.113613	Late G1	0.157036	0.321233	0.231821	0.144201	Late G1	match	FALSE
Tb427_090007800	Tb427-090007800	0.0626959	0.203682	0.0673935	0.0552712	Late G1	0.0666213	0.238687	0.0956807	0.0557994	Late G1	match	FALSE
Tb427_090045600	Tb427-090045600	0.170324	0.207135	0.144698	0.165814	Late G1	0.293678	0.375932	0.340077	0.279624	Late G1	match	FALSE
Tb427_080038900	Tb427-080038900	0.0250784	0.104718	0.0356789	0.0184237	Late G1	0.0319511	0.150671	0.0656096	0.0413793	Late G1	match	FALSE
Tb427_110060800	Tb427-110060800	0.0428422	0.105869	0.0455897	0.0429887	Late G1	0.0795377	0.174043	0.101695	0.0758621	Late G1	match	FALSE
Tb427_110169400	Tb427-110169400	0.0135841	0.0299194	0.0227948	0.013306	Late G1	0.0339905	0.11089	0.0590487	0.0369906	Late G1	match	FALSE
Tb427_060037300	Tb427-060037300	0.142111	0.423475	0.227948	0.135107	Late G1	0.198504	0.732969	0.291416	0.175549	Late G1	match	FALSE
Tb427_110054800	Tb427-110054800	0.0961338	0.149597	0.100099	0.101331	Late G1	0.131883	0.192442	0.173866	0.139812	Late G1	match	FALSE
Tb427_090021500	Tb427-090021500	0.0752351	0.172612	0.086224	0.0880246	Late G1	0.133923	0.303332	0.170585	0.114734	Late G1	match	FALSE
Tb427_070018400	Tb427-070018400	0.114943	0.352129	0.0941526	0.111566	Late G1	0.272604	0.613625	0.288682	0.222571	Late G1	match	FALSE
Tb427_100147900	Tb427-100147900	0.0376176	0.0943613	0.0525273	0.0296827	Late G1	0.0625425	0.217305	0.130672	0.0739812	Late G1	match	FALSE
Tb427_110033100	Tb427-110033100	0.112853	0.195627	0.116947	0.0900716	Late G1	0.185588	0.253108	0.189721	0.161755	Late G1	match	FALSE
Tb427_110053500	Tb427-110053500	0.0950888	0.164557	0.109019	0.09826	Late G1	0.303195	0.561909	0.344451	0.308464	Late G1	match	FALSE
Tb427_060014900	Tb427-060014900	0.0679206	0.104718	0.0654113	0.0542477	Late G1	0.261727	0.297364	0.262985	0.238245	Late G1	match	FALSE
Tb427_090089900	Tb427-090089900	0.123302	0.241657	0.11001	0.0941658	Late G1	0.351462	0.55992	0.300164	0.252038	Late G1	match	FALSE
Tb427_100031100	Tb427-100031100	0.142111	0.235903	0.145689	0.167861	Late G1	0.258328	0.313774	0.248223	0.258307	Late G1	match	FALSE
Tb427_100058500	Tb427-100058500	0.178683	0.285386	0.178394	0.197544	Late G1	0.384092	0.514172	0.422089	0.372414	Late G1	match	FALSE
Tb427_100069400	Tb427-100069400	0.0522466	0.104718	0.0713578	0.0665302	Late G1	0.0747791	0.112879	0.0984144	0.0758621	Late G1	match	FALSE
Tb427_050050900	Tb427-050050900	0.0595611	0.121979	0.120912	0.0859775	Late G1	0.0904147	0.347588	0.182613	0.101567	Late G1	match	FALSE
Tb427_100005900	Tb427-100005900	0.0376176	0.0863061	0.0485629	0.0429887	Late G1	0.0876954	0.24913	0.127939	0.0815047	Late G1	match	FALSE
Tb427_100135800	Tb427-100135800	0.0982236	0.241657	0.150644	0.100307	Late G1	0.184228	0.422178	0.25041	0.178056	Late G1	match	FALSE
Tb427_050033700	Tb427-050033700	0.0856844	0.144994	0.11893	0.087001	Late G1	0.168593	0.294381	0.209404	0.127273	Late G1	match	FALSE
Tb427_110085600	Tb427-110085600	0.210031	0.685846	0.383548	0.27738	Late G1	0.468389	1.00995	0.808639	0.489028	Late G1	match	FALSE
Tb427_090089700	Tb427-090089700	0.204807	0.365938	0.326065	0.232344	Late G1	0.293678	0.575336	0.507381	0.278997	Late G1	match	FALSE
Tb427_030008900	Tb427-030008900	0.144201	0.208285	0.141724	0.101331	Late G1	0.171992	0.296867	0.227447	0.158621	Late G1	match	FALSE
Tb427_090066600	Tb427-090066600	0.0574713	0.0966628	0.0634291	0.0583419	Late G1	0.0774983	0.202884	0.144888	0.0971787	Late G1	match	FALSE
Tb427_090051300	Tb427-090051300	0.0679206	0.150748	0.11893	0.0900716	Late G1	0.116247	0.1636	0.164571	0.132288	S	no	FALSE
Tb427_060039600	Tb427-060039600	0.0428422	0.176064	0.10109	0.0573183	Late G1	0.0401088	0.149677	0.103882	0.0426332	Late G1	match	FALSE
Tb427_020027500	Tb427-020027500	0.252874	0.588032	0.28444	0.257932	Late G1	0.509177	1.08752	0.693275	0.507837	Late G1	match	FALSE
Tb427_070051300	Tb427-070051300	0.0574713	0.161105	0.0951437	0.0675537	Late G1	0.130523	0.366484	0.185347	0.144201	Late G1	match	FALSE
Tb427_030055100	Tb427-030055100	0.0856844	0.142693	0.0981169	0.0962129	Late G1	0.10877	0.246643	0.178239	0.114734	Late G1	match	FALSE
Tb427_030018300	Tb427-030018300	0.128527	0.319908	0.134787	0.100307	Late G1	0.17743	0.649428	0.262438	0.168025	Late G1	match	FALSE
Tb427_090076200	Tb427-090076200	0.168234	0.331415	0.201189	0.180143	Late G1	0.283481	0.433615	0.307818	0.24326	Late G1	match	FALSE
Tb427_040055200	Tb427-040055200	0.0700104	0.148446	0.129832	0.105425	Late G1	0.171992	0.233715	0.211591	0.21442	Late G1	match	FALSE
Tb427_070023900	Tb427-070023900	0.193312	0.253165	0.232904	0.183214	Late G1	0.331067	0.539035	0.446145	0.390596	Late G1	match	FALSE
Tb427_040033700	Tb427-040033700	0.077325	0.134638	0.104063	0.0777892	Late G1	0.0577838	0.198906	0.123565	0.0721003	Late G1	match	FALSE
Tb427_100044300	Tb427-100044300	0.121212	0.250863	0.142716	0.103378	Late G1	0.273283	0.479364	0.29743	0.227586	Late G1	match	FALSE
Tb427_100107600	Tb427-100107600	0.104493	0.13809	0.103072	0.0767656	Late G1	0.200544	0.297364	0.25205	0.184953	Late G1	match	FALSE
Tb427_080066400	Tb427-080066400	0.138976	0.322209	0.156591	0.132037	Late G1	0.236574	0.585778	0.336796	0.191223	Late G1	match	FALSE
Tb427_090029200	Tb427-090029200	0.127482	0.428078	0.212091	0.163767	Late G1	0.260367	0.797116	0.485511	0.186834	Late G1	match	FALSE
Tb427_110166700	Tb427-110166700	0.109718	0.199079	0.159564	0.120778	Late G1	0.103331	0.250124	0.186987	0.0984326	Late G1	match	FALSE
Tb427_030008000	Tb427-030008000	0.0888192	0.132336	0.0713578	0.0747185	Late G1	0.212101	0.336151	0.234554	0.220063	Late G1	match	FALSE
Tb427_110166400	Tb427-110166400	0.0637409	0.153049	0.108028	0.0798362	Late G1	0.0673012	0.242665	0.159103	0.0746082	Late G1	match	FALSE
Tb427_050034400	Tb427-050034400	0.110763	0.254315	0.161546	0.118731	Late G1	0.212101	0.497762	0.3193	0.204389	Late G1	match	FALSE
Tb427_100094900	Tb427-100094900	0.0961338	0.176064	0.13776	0.106448	Late G1	0.133923	0.259572	0.175506	0.124138	Late G1	match	FALSE
Tb427_110007300	Tb427-110007300	0.0752351	0.234753	0.109019	0.0910952	Late G1	0.109449	0.322228	0.192455	0.124765	Late G1	match	FALSE
Tb427_080043900	Tb427-080043900	0.0355277	0.103567	0.0485629	0.0286592	Late G1	0.0530252	0.141721	0.11591	0.0727273	Late G1	match	FALSE
Tb427_070079600	Tb427-070079600	0.135841	0.226697	0.16551	0.12999	Late G1	0.118287	0.258578	0.177146	0.104075	Late G1	match	FALSE
Tb427_100011900	Tb427-100011900	0.315569	0.927503	0.55996	0.423746	Late G1	0.345343	1.0731	0.792236	0.39373	Late G1	match	FALSE
Tb427_100140900	Tb427-100140900	0.123302	0.264672	0.193261	0.154555	Late G1	0.218899	0.438588	0.340077	0.210658	Late G1	match	FALSE
Tb427_030008400	Tb427-030008400	0.0888192	0.597238	0.27552	0.118731	Late G1	0.159755	0.958727	0.644068	0.189342	Late G1	match	FALSE
Tb427_110096100	Tb427-110096100	0.188088	0.364787	0.2111	0.177073	Late G1	0.308634	0.457981	0.32094	0.282759	Late G1	match	FALSE
Tb427_020026400	Tb427-020026400	0.342738	0.471807	0.3667	0.352098	Late G1	0.738273	1.06017	1.01039	0.74232	Late G1	match	FALSE
Tb427_070054200	Tb427-070054200	0.0815047	0.394707	0.145689	0.0685773	Late G1	0.121006	0.641969	0.303991	0.121003	Late G1	match	FALSE
Tb427_090050800	Tb427-090050800	0.0982236	0.174914	0.115956	0.0951894	Late G1	0.148878	0.246643	0.197922	0.178683	Late G1	match	FALSE
Tb427_100072200	Tb427-100072200	0.0501567	0.0759494	0.0683845	0.0573183	Late G1	0.0503059	0.110393	0.0781848	0.0576803	Late G1	match	FALSE
Tb427_100167300	Tb427-100167300	0.0658307	0.119678	0.102081	0.0747185	Late G1	0.0870156	0.199403	0.153089	0.119122	Late G1	match	FALSE
Tb427_000736100	Tb427-000736100	0.0198537	0.0701956	0.0376611	0.0286592	Late G1	0.0292318	0.0785679	0.0486605	0.0263323	Late G1	match	FALSE
Tb427_110024200	Tb427-110024200	0.0491118	0.0874568	0.0812686	0.0665302	Late G1	0.0870156	0.146693	0.118644	0.104702	Late G1	match	FALSE
Tb427_020024900	Tb427-020024900	0.0668757	0.249712	0.111992	0.073695	Late G1	0.112169	0.504227	0.25041	0.109091	Late G1	match	FALSE
Tb427_110076200	Tb427-110076200	0.0282132	0.0529344	0.0455897	0.0296827	Late G1	0.0659415	0.158628	0.0934937	0.060815	Late G1	match	FALSE
Tb427_110128400	Tb427-110128400	0.16092	0.239356	0.20218	0.18219	Late G1	0.290279	0.421183	0.397485	0.320376	Late G1	match	FALSE
Tb427_070079100	Tb427-070079100	0.0658307	0.266974	0.157582	0.120778	Late G1	0.0788579	0.35455	0.220886	0.100313	Late G1	match	FALSE
Tb427_110047000	Tb427-110047000	0.15883	0.47641	0.358771	0.242579	Late G1	0.122366	0.426653	0.394204	0.15674	Late G1	match	FALSE
Tb427_070080400	Tb427-070080400	0.0950888	0.211738	0.13776	0.0839304	Late G1	0.133923	0.304326	0.220886	0.11348	Late G1	match	FALSE
Tb427_080040700	Tb427-080040700	0.326019	0.642117	0.533201	0.417605	Late G1	0.505099	1.01392	0.82012	0.515361	Late G1	match	FALSE
Tb427_080019700	Tb427-080019700	0.125392	0.2313	0.161546	0.12999	Late G1	0.190347	0.237195	0.221979	0.179937	Late G1	match	FALSE
Tb427_110045000	Tb427-110045000	0.0710554	0.131185	0.115956	0.111566	Late G1	0.10537	0.231726	0.184254	0.14232	Late G1	match	FALSE
Tb427_040027000	Tb427-040027000	0.566353	0.878021	0.699703	0.647902	Late G1	0.704283	1.14023	1.10334	0.774295	Late G1	match	FALSE
Tb427_100165500	Tb427-100165500	0.091954	0.166858	0.131814	0.109519	Late G1	0.218219	0.327698	0.303445	0.251411	Late G1	match	FALSE
Tb427_000274500:pseudogene	Tb427-000274500:pseudogene	0.0637409	0.0805524	0.049554	0.0337769	Late G1	0.0673012	0.132273	0.0934937	0.060815	Late G1	match	FALSE
Tb427_070020200	Tb427-070020200	0.091954	0.349827	0.172448	0.108495	Late G1	0.120326	0.453008	0.23018	0.102821	Late G1	match	FALSE
Tb427_050031800	Tb427-050031800	0.0909091	0.158803	0.139742	0.0941658	Late G1	0.14276	0.292889	0.264079	0.176176	Late G1	match	FALSE
Tb427_050041100	Tb427-050041100	0.0344828	0.197929	0.0782953	0.0644831	Late G1	0.057104	0.30184	0.200109	0.0808777	Late G1	match	FALSE
Tb427_070075000	Tb427-070075000	0.0815047	0.10702	0.0981169	0.0829069	Late G1	0.148199	0.2909	0.248223	0.161755	Late G1	match	FALSE
Tb427_110061500	Tb427-110061500	0.0815047	0.283084	0.140733	0.0931423	Late G1	0.0917743	0.405768	0.224713	0.105956	Late G1	match	FALSE
Tb427_110059200	Tb427-110059200	0.0700104	0.127733	0.116947	0.0798362	Late G1	0.0985724	0.20189	0.175506	0.0815047	Late G1	match	FALSE
Tb427_060038400	Tb427-060038400	0.0595611	0.124281	0.104063	0.0900716	Late G1	0.0761387	0.220786	0.186441	0.111599	Late G1	match	FALSE
Tb427_100148300	Tb427-100148300	0.137931	0.317606	0.246779	0.192426	Late G1	0.32155	0.491795	0.48059	0.378056	Late G1	match	FALSE
Tb427_060015400	Tb427-060015400	0.100313	0.202532	0.107037	0.0962129	Late G1	0.157036	0.351069	0.209951	0.146708	Late G1	match	FALSE
Tb427_100063200	Tb427-100063200	0.208986	0.380898	0.223984	0.160696	Late G1	0.32155	0.548981	0.418808	0.318495	Late G1	match	FALSE
Tb427_020020300	Tb427-020020300	0.117032	0.18412	0.163528	0.140225	Late G1	0.17743	0.345102	0.286495	0.198119	Late G1	match	FALSE
Tb427_040015000	Tb427-040015000	0.562173	0.81473	0.503469	0.479017	Late G1	1.06594	1.44853	1.09185	0.909718	Late G1	match	FALSE
Tb427_110091600	Tb427-110091600	0.0971787	0.139241	0.115956	0.0890481	Late G1	0.125765	0.243163	0.212685	0.165517	Late G1	match	FALSE
Tb427_100064100	Tb427-100064100	0.113898	0.212888	0.191278	0.167861	Late G1	0.17947	0.304823	0.294697	0.231348	Late G1	match	FALSE
Tb427_030053000	Tb427-030053000	0.0574713	0.201381	0.134787	0.0941658	Late G1	0.197145	0.469418	0.344997	0.176176	Late G1	match	FALSE
Tb427_090012000	Tb427-090012000	0.0909091	0.119678	0.0822597	0.102354	Late G1	0.136642	0.239682	0.191908	0.147962	Late G1	match	FALSE
Tb427_080006300	Tb427-080006300	0.174504	0.40046	0.234886	0.202661	Late G1	0.335146	0.571855	0.435757	0.337931	Late G1	match	FALSE
Tb427_100051400	Tb427-100051400	0.0574713	0.0978136	0.0654113	0.0552712	Late G1	0.0788579	0.168076	0.13942	0.076489	Late G1	match	FALSE
Tb427_090088700	Tb427-090088700	0.0438871	0.227848	0.112983	0.0665302	Late G1	0.0870156	0.325211	0.224713	0.0858934	Late G1	match	FALSE
Tb427_060015800	Tb427-060015800	0.102403	0.296893	0.213082	0.144319	Late G1	0.183549	0.500249	0.374522	0.184953	Late G1	match	FALSE
Tb427_030038100	Tb427-030038100	0.031348	0.0805524	0.0763132	0.0460594	Late G1	0.0659415	0.19095	0.177146	0.0695925	Late G1	match	FALSE
Tb427_100147000	Tb427-100147000	0.045977	0.109321	0.0396432	0.0440123	Late G1	0.104011	0.21631	0.162931	0.114734	Late G1	match	FALSE
Tb427_070062500	Tb427-070062500	0.0992685	0.161105	0.119921	0.0951894	Late G1	0.254249	0.332173	0.258065	0.280251	Late G1	match	FALSE
Tb427_090008000	Tb427-090008000	0.157785	0.395857	0.180377	0.12999	Late G1	0.241332	0.420189	0.287042	0.196238	Late G1	match	FALSE
Tb427_010024800	Tb427-010024800	0.0961338	0.257768	0.205154	0.117707	Late G1	0.132563	0.350075	0.296884	0.156113	Late G1	match	FALSE
Tb427_080034700	Tb427-080034700	0.0815047	0.128884	0.104063	0.0818833	Late G1	0.156356	0.197414	0.195735	0.169279	Late G1	match	FALSE
Tb427_100105500	Tb427-100105500	0.222571	0.449942	0.26561	0.286592	Late G1	0.39293	0.711586	0.611263	0.473354	Late G1	match	FALSE
Tb427_080068300	Tb427-080068300	0.0721003	0.159954	0.136769	0.101331	Late G1	0.154997	0.270512	0.254784	0.210658	Late G1	match	FALSE
Tb427_110135700	Tb427-110135700	0.0501567	0.155351	0.123885	0.0839304	Late G1	0.0740993	0.262556	0.226353	0.10721	Late G1	match	FALSE
Tb427_080035000	Tb427-080035000	0.126437	0.348677	0.159564	0.110542	Late G1	0.167913	0.432123	0.258611	0.168025	Late G1	match	FALSE
Tb427_090008300	Tb427-090008300	0.0491118	0.101266	0.0842418	0.04913	Late G1	0.0768185	0.159622	0.132313	0.0890282	Late G1	match	FALSE
Tb427_040019200	Tb427-040019200	0.190178	0.304948	0.225966	0.200614	Late G1	0.227056	0.380408	0.27064	0.230094	Late G1	match	FALSE
Tb427_080030800	Tb427-080030800	0.184953	0.332566	0.190287	0.178096	Late G1	0.547927	0.783192	0.706944	0.56489	Late G1	match	FALSE
Tb427_110047300	Tb427-110047300	0.199582	0.397008	0.212091	0.152508	Late G1	0.333107	0.504227	0.406233	0.360502	Late G1	match	FALSE
Tb427_100160600	Tb427-100160600	0.119122	0.21519	0.163528	0.124872	Late G1	0.149558	0.288414	0.267359	0.2	Late G1	match	FALSE
Tb427_110165900	Tb427-110165900	0.564263	1.37975	0.970268	0.617195	Late G1	0.829368	2.17404	1.87261	0.840752	Late G1	match	FALSE
Tb427_090050700	Tb427-090050700	0.176594	0.272727	0.253717	0.253838	Late G1	0.304555	0.405768	0.395845	0.39373	Late G1	match	FALSE
Tb427_100022200	Tb427-100022200	0.0647858	0.161105	0.0961348	0.0511771	Late G1	0.067981	0.254102	0.164024	0.0689655	Late G1	match	FALSE
Tb427_110132000	Tb427-110132000	0.270637	0.425777	0.269574	0.23132	Late G1	0.371176	0.572352	0.551668	0.374295	Late G1	match	FALSE
Tb427_030056400	Tb427-030056400	0.0982236	0.177215	0.111001	0.116684	Late G1	0.152957	0.275485	0.209404	0.152978	Late G1	match	FALSE
Tb427_090011700	Tb427-090011700	0.0491118	0.159954	0.11893	0.0583419	Late G1	0.0577838	0.2909	0.185894	0.0664577	Late G1	match	FALSE
Tb427_100094500	Tb427-100094500	0.167189	0.197929	0.148662	0.131013	Late G1	0.169952	0.242168	0.216512	0.166144	Late G1	match	FALSE
Tb427_100099600	Tb427-100099600	0.136886	0.296893	0.169475	0.140225	Late G1	0.203263	0.339632	0.273373	0.201881	Late G1	match	FALSE
Tb427_100096800	Tb427-100096800	0.0835946	0.417722	0.150644	0.105425	Late G1	0.129164	0.706116	0.506288	0.138558	Late G1	match	FALSE
Tb427_090048300	Tb427-090048300	0.077325	0.158803	0.105055	0.0849539	Late G1	0.146159	0.325709	0.264625	0.129154	Late G1	match	FALSE
Tb427_110017900	Tb427-110017900	0.117032	0.216341	0.177403	0.110542	Late G1	0.152957	0.567877	0.389831	0.196865	Late G1	match	FALSE
Tb427_080042900	Tb427-080042900	0.179728	0.299194	0.232904	0.167861	Late G1	0.259687	0.3819	0.334062	0.221944	Late G1	match	FALSE
Tb427_110051800	Tb427-110051800	0.0835946	0.224396	0.13776	0.0767656	Late G1	0.164514	0.415216	0.306178	0.178683	Late G1	match	FALSE
Tb427_040024600	Tb427-040024600	0.448276	0.576525	0.506442	0.443193	Late G1	0.834806	1.05569	0.936577	0.798746	Late G1	match	FALSE
Tb427_080077000	Tb427-080077000	0.0606061	0.257768	0.153617	0.0992835	Late G1	0.0883753	0.287916	0.223619	0.105956	Late G1	match	FALSE
Tb427_100068500	Tb427-100068500	0.173459	0.257768	0.199207	0.155578	Late G1	0.278722	0.428642	0.402952	0.290282	Late G1	match	FALSE
Tb427_110111500	Tb427-110111500	0.155695	0.321059	0.262636	0.225179	Late G1	0.257648	0.569368	0.549481	0.311599	Late G1	match	FALSE
Tb427_040037000	Tb427-040037000	0.077325	0.156502	0.0891972	0.0511771	Late G1	0.152957	0.247141	0.192455	0.13605	Late G1	match	FALSE
Tb427_080029100	Tb427-080029100	0.102403	0.205984	0.167493	0.138178	Late G1	0.167233	0.239682	0.24877	0.202508	S	no	FALSE
Tb427_110128700	Tb427-110128700	0.127482	0.182969	0.154609	0.124872	Late G1	0.164514	0.26355	0.207217	0.15047	Late G1	match	FALSE
Tb427_080039600	Tb427-080039600	0.0835946	0.124281	0.112983	0.11566	Late G1	0.116927	0.225758	0.203937	0.17116	Late G1	match	FALSE
Tb427_070063100	Tb427-070063100	0.0658307	0.130035	0.0872151	0.0849539	Late G1	0.0747791	0.203381	0.163477	0.103448	Late G1	match	FALSE
Tb427_060016600	Tb427-060016600	0.0898642	0.134638	0.115956	0.087001	Late G1	0.116247	0.186474	0.172225	0.1279	Late G1	match	FALSE
Tb427_060039200	Tb427-060039200	0.0689655	0.118527	0.102081	0.0921187	Late G1	0.0836166	0.206862	0.189174	0.0990596	Late G1	match	FALSE
Tb427_030009700	Tb427-030009700	0.0731452	0.255466	0.161546	0.09826	Late G1	0.201224	0.476877	0.386003	0.219436	Late G1	match	FALSE
Tb427_070010900	Tb427-070010900	0.0595611	0.182969	0.14668	0.0890481	Late G1	0.0910945	0.305321	0.286495	0.14232	Late G1	match	FALSE
Tb427_100163000	Tb427-100163000	0.155695	0.26122	0.196234	0.141249	Late G1	0.121006	0.214818	0.179333	0.119122	Late G1	match	FALSE
Tb427_110021700	Tb427-110021700	0.111808	0.203682	0.161546	0.144319	Late G1	0.272604	0.403779	0.376162	0.308464	Late G1	match	FALSE
Tb427_030037200	Tb427-030037200	0.0595611	0.0863061	0.074331	0.0562948	Late G1	0.193746	0.261064	0.243849	0.2	Late G1	match	FALSE
Tb427_040044500	Tb427-040044500	0.0407524	0.13809	0.108028	0.0573183	Late G1	0.0482665	0.21631	0.124658	0.0639498	Late G1	match	FALSE
Tb427_100129200	Tb427-100129200	0.0449321	0.140391	0.135778	0.0829069	Late G1	0.0584636	0.198409	0.180426	0.102821	Late G1	match	FALSE
Tb427_100167100	Tb427-100167100	0.295716	0.372842	0.323092	0.257932	Late G1	0.481305	0.702138	0.640787	0.559875	Late G1	match	FALSE
Tb427_070049100	Tb427-070049100	0.0668757	0.220944	0.162537	0.0818833	Late G1	0.111489	0.32372	0.257518	0.130408	Late G1	match	FALSE
Tb427_110124800	Tb427-110124800	0.208986	0.330265	0.328048	0.232344	Late G1	0.197825	0.375932	0.338983	0.227586	Late G1	match	FALSE
Tb427_060016500	Tb427-060016500	0.101358	0.1542	0.140733	0.119754	Late G1	0.155676	0.267031	0.274467	0.187461	S	no	FALSE
Tb427_110095200	Tb427-110095200	0.0835946	0.16916	0.115956	0.0900716	Late G1	0.171992	0.256091	0.224166	0.179937	Late G1	match	FALSE
Tb427_110062500	Tb427-110062500	0.124347	0.166858	0.120912	0.109519	Late G1	0.129164	0.181502	0.179333	0.123511	Late G1	match	FALSE
Tb427_040007200	Tb427-040007200	0.0710554	0.196778	0.154609	0.143296	Late G1	0.165874	0.337146	0.351558	0.205016	S	no	FALSE
Tb427_000481600:pseudogene	Tb427-000481600:pseudogene	0.173459	0.248562	0.223984	0.16479	Late G1	0.116247	0.153655	0.141061	0.107837	Late G1	match	FALSE
Tb427_060053000	Tb427-060053000	0.214211	0.386651	0.25669	0.258956	Late G1	0.360299	0.514669	0.493166	0.326646	Late G1	match	FALSE
Tb427_070068800	Tb427-070068800	0.140021	0.387802	0.181368	0.11259	Late G1	0.244052	0.779214	0.469656	0.209404	Late G1	match	FALSE
Tb427_100096900	Tb427-100096900	0.0992685	0.484465	0.259663	0.111566	Late G1	0.10605	0.678767	0.617277	0.148589	Late G1	match	FALSE
Tb427_100033800	Tb427-100033800	0.144201	0.21519	0.180377	0.134084	Late G1	0.169273	0.281452	0.282668	0.183699	S	no	FALSE
Tb427_060054700	Tb427-060054700	0.270637	0.414269	0.287413	0.302968	Late G1	0.454793	0.548981	0.515582	0.374295	Late G1	match	FALSE
Tb427_100127700	Tb427-100127700	0.318704	0.52359	0.462834	0.435005	Late G1	0.325629	0.581303	0.533625	0.492163	Late G1	match	FALSE
Tb427_100096500	Tb427-100096500	0.061651	0.179517	0.176412	0.0798362	Late G1	0.0720598	0.257086	0.232367	0.0890282	Late G1	match	FALSE
Tb427_110082700	Tb427-110082700	0.141066	0.424626	0.298315	0.184237	Late G1	0.375255	0.909498	0.867687	0.415047	Late G1	match	FALSE
Tb427_080077100	Tb427-080077100	0.127482	0.336018	0.221011	0.132037	Late G1	0.262407	0.532571	0.517223	0.290909	Late G1	match	FALSE
Tb427_050033400	Tb427-050033400	0.0501567	0.0874568	0.061447	0.0532242	Late G1	0.10673	0.164097	0.15965	0.133542	Late G1	match	FALSE
Tb427_100168500	Tb427-100168500	0.0522466	0.141542	0.12884	0.0900716	Late G1	0.103331	0.218797	0.217605	0.131034	Late G1	match	FALSE
Tb427_070068900	Tb427-070068900	0.123302	0.166858	0.150644	0.109519	Late G1	0.210061	0.262059	0.260252	0.204389	Late G1	match	FALSE
Tb427_110130800	Tb427-110130800	0.205852	0.345224	0.32111	0.27738	Late G1	0.274643	0.524615	0.482777	0.310972	Late G1	match	FALSE
Tb427_010015000	Tb427-010015000	0.0888192	0.18412	0.176412	0.127943	Late G1	0.0917743	0.187966	0.172772	0.105329	Late G1	match	FALSE
Tb427_030006600	Tb427-030006600	0.234065	0.352129	0.268583	0.26305	Late G1	0.426241	0.597713	0.575178	0.53605	Late G1	match	FALSE
Tb427_050052100	Tb427-050052100	0.0804598	0.26122	0.193261	0.138178	Late G1	0.211421	0.408752	0.376162	0.24953	Late G1	match	FALSE
Tb427_100096700	Tb427-100096700	0.0867294	0.352129	0.262636	0.132037	Late G1	0.14344	0.499254	0.403499	0.128527	Late G1	match	FALSE
Tb427_110183500	Tb427-110183500	0.111808	0.197929	0.182359	0.197544	Late G1	0.197825	0.341621	0.31766	0.242006	Late G1	match	FALSE
Tb427_060026700	Tb427-060026700	0.0721003	0.113924	0.105055	0.0655067	Late G1	0.129164	0.183988	0.174412	0.159875	Late G1	match	FALSE
Tb427_060020000	Tb427-060020000	0.0689655	0.12313	0.11893	0.0706244	Late G1	0.0673012	0.173545	0.159103	0.0746082	Late G1	match	FALSE
Tb427_090046100	Tb427-090046100	0.0564263	0.12313	0.107037	0.0603889	Late G1	0.0509857	0.138737	0.140514	0.0601881	S	no	FALSE
Tb427_050041400	Tb427-050041400	0.0219436	0.0632911	0.0515362	0.0368475	Late G1	0.0584636	0.142218	0.136687	0.0802508	Late G1	match	FALSE
Tb427_070068200	Tb427-070068200	0.0470219	0.131185	0.125867	0.0808598	Late G1	0.0815772	0.239682	0.229087	0.104702	Late G1	match	FALSE
Tb427_100012000	Tb427-100012000	0.174504	0.505178	0.374628	0.236438	Late G1	0.21482	0.611139	0.601422	0.290282	Late G1	match	FALSE
Tb427_030012100	Tb427-030012100	0.0992685	0.168009	0.145689	0.121801	Late G1	0.280082	0.414222	0.421542	0.336677	S	no	FALSE
Tb427_060036100	Tb427-060036100	0.251829	0.329114	0.280476	0.31218	Late G1	0.263766	0.343113	0.366867	0.29906	S	no	FALSE
Tb427_080013000	Tb427-080013000	0.114943	0.197929	0.152626	0.116684	Late G1	0.21346	0.292889	0.285949	0.22884	Late G1	match	FALSE
Tb427_070069600	Tb427-070069600	0.105538	0.171461	0.132805	0.149437	Late G1	0.136642	0.236698	0.252597	0.190596	S	no	FALSE
Tb427_090049600	Tb427-090049600	0.170324	0.263521	0.217047	0.200614	Late G1	0.332427	0.439085	0.494806	0.398119	S	no	FALSE
Tb427_110090100	Tb427-110090100	0.132706	0.209436	0.187314	0.140225	Late G1	0.127124	0.19095	0.180426	0.139812	Late G1	match	FALSE
Tb427_080080000	Tb427-080080000	0.0992685	0.195627	0.154609	0.134084	Late G1	0.169952	0.233715	0.245489	0.202508	S	no	FALSE
Tb427_100016900	Tb427-100016900	0.539185	0.787112	0.627354	0.57216	Late G1	0.717879	1.14023	1.17277	0.780564	S	no	FALSE
Tb427_110058400	Tb427-110058400	0.0710554	0.197929	0.177403	0.0941658	Late G1	0.0747791	0.217802	0.229087	0.102194	S	no	FALSE
Tb427_100124100	Tb427-100124100	0.104493	0.181818	0.179386	0.152508	Late G1	0.197145	0.308304	0.358119	0.255799	S	no	FALSE
Tb427_100055500	Tb427-100055500	0.145246	0.173763	0.123885	0.128966	Late G1	0.261727	0.315763	0.369601	0.275235	S	no	FALSE
Tb427_100157000	Tb427-100157000	0.100313	0.181818	0.11893	0.106448	Late G1	0.195785	0.304823	0.305631	0.232602	S	no	FALSE
Tb427_100090100	Tb427-100090100	0.0647858	0.283084	0.233895	0.117707	Late G1	0.10605	0.439085	0.54456	0.119122	S	no	FALSE
Tb427_100068000	Tb427-100068000	0.187043	0.255466	0.244797	0.236438	Late G1	0.297757	0.439582	0.483324	0.375549	S	no	FALSE
Tb427_000781200:pseudogene	Tb427-000781200:pseudogene	0.0815047	0.110472	0.11001	0.09826	Late G1	0.0795377	0.114371	0.117551	0.0752351	S	no	FALSE
Tb427_100161000	Tb427-100161000	0.147335	0.204833	0.194252	0.192426	Late G1	0.239973	0.377424	0.439584	0.319122	S	no	FALSE
Tb427_080033500	Tb427-080033500	0.163009	0.240506	0.201189	0.19652	Late G1	0.324269	0.376927	0.412247	0.363009	S	no	FALSE
Tb427_110147000	Tb427-110147000	0.223615	0.455696	0.393459	0.323439	Late G1	0.496941	0.7091	0.757791	0.617555	S	no	FALSE
Tb427_070046300	Tb427-070046300	0.0846395	0.127733	0.126858	0.104401	Late G1	0.134602	0.203381	0.232367	0.149216	S	no	FALSE
Tb427_090092200	Tb427-090092200	0.123302	0.211738	0.206145	0.162743	Late G1	0.0876954	0.141223	0.16129	0.101567	S	no	FALSE
Tb427_070043700	Tb427-070043700	0.103448	0.142693	0.139742	0.110542	Late G1	0.147519	0.204873	0.238382	0.196865	S	no	FALSE
Tb427_100171500	Tb427-100171500	0.23511	0.243959	0.222002	0.166837	Late G1	0.232495	0.251119	0.289776	0.225705	S	no	FALSE
Tb427_100110100	Tb427-100110100	0.241379	0.347526	0.302279	0.234391	Late G1	0.329028	0.428145	0.462548	0.328527	S	no	FALSE
Tb427_100054800:pseudogene	Tb427-100054800:pseudogene	0.126437	0.224396	0.191278	0.141249	Late G1	0.159075	0.43461	0.491525	0.20815	S	no	FALSE
Tb427_100031000	Tb427-100031000	0.446186	0.7687	0.738355	0.528147	Late G1	0.524813	0.73645	0.863313	0.663323	S	no	FALSE
Tb427_110022100	Tb427-110022100	0.333333	0.498274	0.461843	0.404299	Late G1	0.530252	0.624565	0.715145	0.542947	S	no	FALSE
Tb427_100074200	Tb427-100074200	0.0397074	0.101266	0.0921705	0.0829069	Late G1	0.0414684	0.0651417	0.0705303	0.0576803	S	no	FALSE
Tb427_070039400	Tb427-070039400	0.133751	0.27618	0.166501	0.162743	Late G1	0.21278	0.36549	0.378896	0.227586	S	no	FALSE
Tb427_040053400	Tb427-040053400	0.157785	0.302647	0.274529	0.252815	Late G1	0.225697	0.32372	0.338436	0.315361	S	no	FALSE
Tb427_110085500	Tb427-110085500	0.0606061	0.0817031	0.0733399	0.073695	Late G1	0.0768185	0.115365	0.142701	0.0959248	S	no	FALSE
Tb427_090032500	Tb427-090032500	0.127482	0.16916	0.147671	0.132037	Late G1	0.159755	0.222775	0.260798	0.212539	S	no	FALSE
Tb427_070057300	Tb427-070057300	0.0846395	0.196778	0.189296	0.163767	Late G1	0.273283	0.479861	0.606342	0.445768	S	no	FALSE
Tb427_100088200	Tb427-100088200	0.129572	0.20023	0.167493	0.151484	Late G1	0.207342	0.331676	0.360853	0.219436	S	no	FALSE
Tb427_080041800	Tb427-080041800	0.177638	0.247411	0.234886	0.209826	Late G1	0.288239	0.383391	0.45544	0.347335	S	no	FALSE
Tb427_020031400	Tb427-020031400	0.169279	0.302647	0.2111	0.195496	Late G1	0.261047	0.365987	0.42865	0.267085	S	no	FALSE
Tb427_110095000	Tb427-110095000	0.0971787	0.196778	0.16551	0.119754	Late G1	0.0802175	0.141721	0.143794	0.0871473	S	no	FALSE
Tb427_110176400	Tb427-110176400	0.0585162	0.0932106	0.0911794	0.0829069	Late G1	0.0639021	0.0740925	0.104429	0.0902821	S	no	FALSE
Tb427_040022400	Tb427-040022400	0.123302	0.139241	0.138751	0.132037	Late G1	0.183549	0.234709	0.282121	0.236991	S	no	FALSE
Tb427_030042500	Tb427-030042500	0.277952	0.303797	0.251734	0.292733	Late G1	0.483345	0.4545	0.540186	0.646395	G2M	no	FALSE
Tb427_080049400	Tb427-080049400	0.184953	0.204833	0.133796	0.175026	Late G1	0.46567	0.437593	0.409513	0.615047	G2M	no	FALSE
Tb427_070009900	Tb427-070009900	0.141066	0.177215	0.125867	0.16172	Late G1	0.380693	0.377921	0.377802	0.482132	G2M	no	FALSE
Tb427_060011600	Tb427-060011600	0.289446	0.295742	0.187314	0.261003	Late G1	0.421482	0.426653	0.389284	0.445141	G2M	no	FALSE
Tb427_060037500	Tb427-060037500	0.196447	0.280783	0.188305	0.241556	Late G1	0.17879	0.250124	0.186987	0.207524	Late G1	match	FALSE
Tb427_110064300	Tb427-110064300	0.171369	0.196778	0.122894	0.171955	Late G1	0.14344	0.169567	0.144888	0.188088	G2M	no	FALSE
Tb427_110150500	Tb427-110150500	1.97597	2.08746	1.22101	1.1914	Late G1	2.87356	2.8364	1.78622	2.03699	Early G1	no	FALSE
Tb427_060008400	Tb427-060008400	0.310345	0.247411	0.363726	0.327533	S	2.88579	2.14968	2.92783	3.12915	G2M	no	FALSE
Tb427_040015500	Tb427-040015500	0.0961338	0.1542	0.156591	0.111566	S	0.136642	0.291895	0.202296	0.127273	Late G1	no	FALSE
Tb427_020018000	Tb427-020018000	0.0877743	0.161105	0.176412	0.163767	S	0.140041	0.272004	0.279934	0.213793	S	match	FALSE
Tb427_110032000	Tb427-110032000	0.0428422	0.10702	0.117939	0.0829069	S	0.0414684	0.172551	0.152542	0.0633229	Late G1	no	FALSE
Tb427_110019200	Tb427-110019200	0.523511	0.63061	0.679881	0.623337	S	0.231135	0.358528	0.350465	0.267085	Late G1	no	FALSE
Tb427_080045900	Tb427-080045900	0.188088	0.342923	0.433102	0.307062	S	0.07138	0.11089	0.113177	0.0940439	S	match	FALSE
Tb427_030016700	Tb427-030016700	0.0585162	0.0794016	0.0872151	0.0655067	S	0.0768185	0.157136	0.146528	0.110972	Late G1	no	FALSE
Tb427_100151500	Tb427-100151500	0.175549	0.232451	0.304262	0.243603	S	0.201903	0.353555	0.351558	0.282759	Late G1	no	FALSE
Tb427_030055500	Tb427-030055500	0.0658307	0.194476	0.198216	0.120778	S	0.0836166	0.307807	0.284855	0.131034	Late G1	no	FALSE
Tb427_070081600:pseudogene	Tb427-070081600:pseudogene	0.0407524	0.0529344	0.0782953	0.0716479	S	0.0863358	0.136251	0.162384	0.0902821	S	match	FALSE
Tb427_040051300:pseudogene	Tb427-040051300:pseudogene	0.132706	0.174914	0.204163	0.17912	S	0.140041	0.177026	0.199016	0.164263	S	match	FALSE
Tb427_030009300	Tb427-030009300	0.0574713	0.117376	0.143707	0.0634596	S	0.0768185	0.297862	0.29579	0.112853	Late G1	no	FALSE
Tb427_030055700	Tb427-030055700	0.0877743	0.148446	0.166501	0.122825	S	0.145479	0.292889	0.285949	0.149216	Late G1	no	FALSE
Tb427_030020100	Tb427-030020100	0.0553814	0.104718	0.143707	0.0951894	S	0.0938137	0.187966	0.200109	0.137304	S	match	FALSE
Tb427_080069400	Tb427-080069400	0.132706	0.212888	0.248761	0.178096	S	0.152957	0.318747	0.360853	0.204389	S	match	FALSE
Tb427_100042800	Tb427-100042800	0.16092	0.237054	0.269574	0.190379	S	0.259007	0.359025	0.388737	0.341066	S	match	FALSE
Tb427_010006000	Tb427-010006000	0.0376176	0.0713464	0.0763132	0.0552712	S	0.0509857	0.119344	0.135593	0.0852665	S	match	FALSE
Tb427_090045700	Tb427-090045700	0.239289	0.291139	0.326065	0.307062	S	0.407206	0.51815	0.573537	0.488401	S	match	FALSE
Tb427_090028000	Tb427-090028000	0.0114943	0.0218642	0.0376611	0.0122825	S	0.0299116	0.0979612	0.101695	0.0470219	S	match	FALSE
Tb427_100028000	Tb427-100028000	0.270637	0.349827	0.408325	0.392016	S	0.329708	0.454998	0.509021	0.438245	S	match	FALSE
Tb427_030011500	Tb427-030011500	0.0867294	0.135788	0.173439	0.106448	S	0.148199	0.244654	0.281575	0.18558	S	match	FALSE
Tb427_100133700	Tb427-100133700	0.0877743	0.12313	0.13776	0.0921187	S	0.14344	0.182994	0.1848	0.166771	S	match	FALSE
Tb427_040044000	Tb427-040044000	0.0689655	0.177215	0.254708	0.0921187	S	0.0435078	0.0944804	0.115364	0.060815	S	match	FALSE
Tb427_030020200	Tb427-030020200	0.15674	0.443038	0.567889	0.206755	S	0.203263	0.715564	0.954073	0.297179	S	match	FALSE
Tb427_080036100	Tb427-080036100	0.0721003	0.0863061	0.143707	0.108495	S	0.131883	0.181999	0.216512	0.139812	S	match	FALSE
Tb427_080076100	Tb427-080076100	0.219436	0.426928	0.524281	0.327533	S	0.193066	0.382894	0.488792	0.251411	S	match	FALSE
Tb427_100134600	Tb427-100134600	0.153605	0.298044	0.352825	0.24565	S	0.271244	0.500249	0.554948	0.38558	S	match	FALSE
Tb427_110065200	Tb427-110065200	0.0344828	0.0828539	0.0832507	0.0655067	S	0.0591434	0.127797	0.142701	0.0984326	S	match	FALSE
Tb427_110183600	Tb427-110183600	0.229885	0.571922	0.833499	0.377687	S	0.212101	0.873197	1.20011	0.305329	S	match	FALSE
Tb427_060038000	Tb427-060038000	0.179728	0.242808	0.263627	0.243603	S	0.232495	0.2909	0.330782	0.275862	S	match	FALSE
Tb427_110056100	Tb427-110056100	0.0501567	0.0782509	0.086224	0.0655067	S	0.0829368	0.153655	0.166758	0.106583	S	match	FALSE
Tb427_050039300	Tb427-050039300	0.124347	0.205984	0.212091	0.138178	S	0.180829	0.265042	0.304538	0.217555	S	match	FALSE
Tb427_070011500	Tb427-070011500	0.0877743	0.124281	0.152626	0.117707	S	0.0761387	0.091994	0.114817	0.077116	S	match	FALSE
Tb427_100085800	Tb427-100085800	0.0637409	0.0932106	0.12884	0.0951894	S	0.103331	0.183491	0.221979	0.125392	S	match	FALSE
Tb427_100076500	Tb427-100076500	0.0752351	0.113924	0.131814	0.110542	S	0.131203	0.257583	0.299617	0.197492	S	match	FALSE
Tb427_110015600:pseudogene	Tb427-110015600:pseudogene	0.0606061	0.10817	0.150644	0.0890481	S	0.100612	0.19095	0.219245	0.138558	S	match	FALSE
Tb427_100149200	Tb427-100149200	0.0626959	0.0828539	0.119921	0.0829069	S	0.0686608	0.108404	0.133953	0.0846395	S	match	FALSE
Tb427_110160700	Tb427-110160700	0.0553814	0.0920598	0.111992	0.106448	S	0.0652617	0.103431	0.123565	0.076489	S	match	FALSE
Tb427_050041900	Tb427-050041900	0.123302	0.165708	0.17443	0.155578	S	0.219579	0.327698	0.369601	0.297806	S	match	FALSE
Tb427_010014800	Tb427-010014800	0.138976	0.227848	0.304262	0.186285	S	0.220258	0.37991	0.460908	0.27837	S	match	FALSE
Tb427_060033600	Tb427-060033600	0.203762	0.413119	0.423191	0.206755	S	0.211421	0.471905	0.679606	0.246395	S	match	FALSE
Tb427_070062400	Tb427-070062400	0.106583	0.166858	0.280476	0.188332	S	0.157036	0.230234	0.309459	0.248903	S	match	FALSE
Tb427_110051500	Tb427-110051500	0.120167	0.141542	0.195243	0.150461	S	0.235894	0.289408	0.322034	0.232602	S	match	FALSE
Tb427_110105300	Tb427-110105300	0.0512017	0.0874568	0.0921705	0.062436	S	0.128484	0.176529	0.198469	0.157367	S	match	FALSE
Tb427_110061300	Tb427-110061300	0.144201	0.13809	0.182359	0.126919	S	0.119646	0.182994	0.191908	0.146082	S	match	FALSE
Tb427_080053500	Tb427-080053500	0.0971787	0.0943613	0.169475	0.131013	S	0.0591434	0.067628	0.103882	0.0808777	S	match	FALSE
Tb427_100162000	Tb427-100162000	0.291536	0.35328	0.419227	0.333675	S	0.370496	0.460467	0.604702	0.471473	S	match	FALSE
Tb427_010028600	Tb427-010028600	0.147335	0.195627	0.213082	0.158649	S	0.329708	0.435604	0.505741	0.382445	S	match	FALSE
Tb427_070053400	Tb427-070053400	0.103448	0.133487	0.168484	0.12999	S	0.175391	0.295873	0.360306	0.29279	S	match	FALSE
Tb427_090027800	Tb427-090027800	0.0700104	0.117376	0.141724	0.137155	S	0.130523	0.242665	0.305085	0.184953	S	match	FALSE
Tb427_080027800	Tb427-080027800	0.290491	0.508631	0.570862	0.454452	S	0.460911	0.672302	0.792236	0.681505	S	match	FALSE
Tb427_020032100	Tb427-020032100	0.396029	0.562716	0.749257	0.516888	S	0.632223	1.35256	1.70804	0.909718	S	match	FALSE
Tb427_070010700	Tb427-070010700	0.0909091	0.153049	0.17443	0.144319	S	0.209381	0.3272	0.351558	0.307837	S	match	FALSE
Tb427_090005000	Tb427-090005000	0.0114943	0.0552359	0.0594648	0.0286592	S	0.0183549	0.0770761	0.103335	0.0344828	S	match	FALSE
Tb427_070020000	Tb427-070020000	0.0825496	0.116226	0.126858	0.114637	S	0.150238	0.202387	0.248223	0.186207	S	match	FALSE
Tb427_030023000	Tb427-030023000	0.0835946	0.156502	0.168484	0.143296	S	0.197825	0.282944	0.329688	0.257053	S	match	FALSE
Tb427_100049900	Tb427-100049900	0.110763	0.161105	0.17443	0.152508	S	0.191706	0.333665	0.36632	0.233856	S	match	FALSE
Tb427_110176500	Tb427-110176500	0.106583	0.216341	0.309217	0.124872	S	0.119646	0.251616	0.437397	0.154859	S	match	FALSE
Tb427_110127900	Tb427-110127900	0.0741902	0.100115	0.123885	0.0777892	S	0.0829368	0.161611	0.238382	0.122884	S	match	FALSE
Tb427_090078100	Tb427-090078100	0.117032	0.147296	0.229931	0.209826	S	0.166553	0.309299	0.400219	0.255172	S	match	FALSE
Tb427_100143700	Tb427-100143700	0.0585162	0.113924	0.119921	0.101331	S	0.0618627	0.109896	0.148168	0.092163	S	match	FALSE
Tb427_110077700	Tb427-110077700	0.0407524	0.0724971	0.074331	0.062436	S	0.102651	0.18001	0.193548	0.173668	S	match	FALSE
Tb427_090078400	Tb427-090078400	0.0647858	0.135788	0.141724	0.107472	S	0.0448674	0.166087	0.191908	0.0909091	S	match	FALSE
Tb427_110157600	Tb427-110157600	0.0470219	0.0955121	0.12884	0.0706244	S	0.0890551	0.206365	0.223619	0.129781	S	match	FALSE
Tb427_010011400	Tb427-010011400	0.077325	0.126582	0.134787	0.09826	S	0.132563	0.189458	0.221979	0.206897	S	match	FALSE
Tb427_090056000	Tb427-090056000	0.0731452	0.0736479	0.0911794	0.0829069	S	0.101292	0.156638	0.221432	0.147335	S	match	FALSE
Tb427_050048400	Tb427-050048400	0.077325	0.0989643	0.147671	0.09826	S	0.162475	0.231228	0.314926	0.201881	S	match	FALSE
Tb427_090085100	Tb427-090085100	0.15256	0.373993	0.685828	0.257932	S	0.167233	0.595226	1.02952	0.258307	S	match	FALSE
Tb427_100089300	Tb427-100089300	0.143156	0.239356	0.299306	0.199591	S	0.201224	0.361014	0.463095	0.31348	S	match	FALSE
Tb427_070038600	Tb427-070038600	0.522466	0.756041	1.09613	0.774821	S	0.876275	1.23421	1.84855	1.20564	S	match	FALSE
Tb427_110105000	Tb427-110105000	0.0700104	0.0886076	0.102081	0.0951894	S	0.10537	0.109398	0.15637	0.124765	S	match	FALSE
Tb427_070052900	Tb427-070052900	0.400209	0.464902	0.757185	0.474923	S	0.380693	0.471905	0.665391	0.465831	S	match	FALSE
Tb427_100138100	Tb427-100138100	0.0804598	0.156502	0.243806	0.110542	S	0.0761387	0.130283	0.212138	0.0978056	S	match	FALSE
Tb427_030031700	Tb427-030031700	0.115987	0.187572	0.198216	0.159672	S	0.169273	0.292889	0.338983	0.26395	S	match	FALSE
Tb427_050041800	Tb427-050041800	0.0825496	0.0771001	0.139742	0.108495	S	0.138001	0.188463	0.234554	0.210658	S	match	FALSE
Tb427_100095700	Tb427-100095700	0.22675	0.357883	0.415263	0.298874	S	0.316791	0.622079	0.740842	0.452038	S	match	FALSE
Tb427_070011600	Tb427-070011600	0.176594	0.26122	0.294351	0.216991	S	0.261727	0.356042	0.454893	0.391223	S	match	FALSE
Tb427_100033100:pseudogene	Tb427-100033100:pseudogene	0.153605	0.189873	0.210109	0.189355	S	0.245411	0.331676	0.404593	0.360502	S	match	FALSE
Tb427_080053800	Tb427-080053800	0.22466	0.286536	0.429138	0.301945	S	0.371176	0.499751	0.644615	0.533542	S	match	FALSE
Tb427_100041000	Tb427-100041000	0.256008	0.426928	0.603568	0.396111	S	0.573759	0.859771	1.21378	0.889655	S	match	FALSE
Tb427_110147800	Tb427-110147800	0.0982236	0.127733	0.177403	0.113613	S	0.184908	0.287419	0.38491	0.242006	S	match	FALSE
Tb427_000198100:pseudogene	Tb427-000198100:pseudogene	0.0752351	0.166858	0.190287	0.128966	S	0.0788579	0.22178	0.36468	0.151097	S	match	FALSE
Tb427_100054000	Tb427-100054000	0.0491118	0.113924	0.210109	0.104401	S	0.0985724	0.206365	0.365774	0.2	S	match	FALSE
Tb427_100033200	Tb427-100033200	0.344828	0.467204	0.563925	0.445241	S	0.426241	0.697663	0.850191	0.631975	S	match	FALSE
Tb427_100069800	Tb427-100069800	0.0595611	0.0771001	0.148662	0.113613	S	0.0659415	0.191447	0.323674	0.0971787	S	match	FALSE
Tb427_090054000	Tb427-090054000	0.0888192	0.142693	0.171457	0.122825	S	0.195785	0.242665	0.294697	0.253918	S	match	FALSE
Tb427_020016400	Tb427-020016400	0.177638	0.188723	0.251734	0.22825	S	0.303195	0.463451	0.56643	0.487774	S	match	FALSE
Tb427_110189700	Tb427-110189700	0.159875	0.195627	0.196234	0.193449	S	0.240653	0.271009	0.326408	0.287774	S	match	FALSE
Tb427_050039600	Tb427-050039600	0.0856844	0.111623	0.134787	0.118731	S	0.175391	0.232223	0.291416	0.265204	S	match	FALSE
Tb427_070025700	Tb427-070025700	0.133751	0.237054	0.470763	0.227226	S	0.151598	0.368971	0.647895	0.268339	S	match	FALSE
Tb427_090077200	Tb427-090077200	0.102403	0.157652	0.206145	0.188332	S	0.208022	0.261561	0.324768	0.281505	S	match	FALSE
Tb427_010029200	Tb427-010029200	0.16092	0.301496	0.310208	0.240532	S	0.276683	0.361512	0.45544	0.334169	S	match	FALSE
Tb427_050042800	Tb427-050042800	0.0626959	0.0759494	0.0951437	0.0941658	S	0.0876954	0.136251	0.191361	0.133542	S	match	FALSE
Tb427_050029500	Tb427-050029500	0.102403	0.110472	0.171457	0.0910952	S	0.259687	0.340129	0.47731	0.330408	S	match	FALSE
Tb427_050013300	Tb427-050013300	0.143156	0.313003	0.379584	0.207779	S	0.227056	0.430632	0.644615	0.376803	S	match	FALSE
Tb427_110175900	Tb427-110175900	0.0867294	0.118527	0.149653	0.134084	S	0.0727396	0.102437	0.130126	0.112226	S	match	FALSE
Tb427_040050900	Tb427-040050900	0.164054	0.195627	0.309217	0.246673	S	0.274643	0.379413	0.509568	0.34232	S	match	FALSE
Tb427_030037700	Tb427-030037700	0.467085	1.05293	1.13974	0.674514	S	0.932699	1.50671	2.25205	1.24389	S	match	FALSE
Tb427_100119600	Tb427-100119600	0.293626	0.36939	0.510406	0.435005	S	0.592114	0.763799	0.990705	0.790596	S	match	FALSE
Tb427_110088900	Tb427-110088900	0.111808	0.146145	0.186323	0.170931	S	0.203943	0.276977	0.371788	0.291536	S	match	FALSE
Tb427_110165200	Tb427-110165200	0.231975	0.319908	0.378593	0.292733	S	0.269884	0.392342	0.449973	0.387461	S	match	FALSE
Tb427_030053500	Tb427-030053500	0.140021	0.156502	0.325074	0.293756	S	0.246091	0.313277	0.552761	0.433229	S	match	FALSE
Tb427_040018700	Tb427-040018700	0.134796	0.10817	0.216056	0.215967	S	0.109449	0.13277	0.163477	0.154232	S	match	FALSE
Tb427_110079200	Tb427-110079200	0.375131	0.834292	1.37364	0.753327	S	0.836166	1.46743	2.26627	1.15611	S	match	FALSE
Tb427_080019600	Tb427-080019600	0.142111	0.301496	0.601586	0.32958	S	0.228416	0.458478	0.990159	0.54232	S	match	FALSE
Tb427_010027900:pseudogene	Tb427-010027900:pseudogene	0.117032	0.177215	0.190287	0.141249	S	0.209381	0.271507	0.371241	0.219436	S	match	FALSE
Tb427_090008100	Tb427-090008100	0.077325	0.130035	0.134787	0.104401	S	0.154317	0.223769	0.282121	0.226332	S	match	FALSE
Tb427_020005300	Tb427-020005300	0.0950888	0.139241	0.140733	0.105425	S	0.210741	0.237693	0.31602	0.203135	S	match	FALSE
Tb427_110055100	Tb427-110055100	0.336468	0.58458	1.05154	0.779939	S	0.519375	0.72551	1.13395	0.929781	S	match	FALSE
Tb427_080046800	Tb427-080046800	0.878788	0.823936	1.95441	1.67042	S	1.07818	1.42516	2.42482	1.91473	S	match	FALSE
Tb427_070034900	Tb427-070034900	0.101358	0.158803	0.232904	0.156602	S	0.116927	0.181999	0.215418	0.152351	S	match	FALSE
Tb427_040056500	Tb427-040056500	0.110763	0.222094	0.274529	0.145343	S	0.173351	0.330184	0.511755	0.221944	S	match	FALSE
Tb427_080021900	Tb427-080021900	0.108673	0.139241	0.142716	0.120778	S	0.280761	0.336151	0.401859	0.297806	S	match	FALSE
Tb427_090055600	Tb427-090055600	0.104493	0.174914	0.369673	0.194473	S	0.252209	0.455992	0.831055	0.452038	S	match	FALSE
Tb427_100113000	Tb427-100113000	0.242424	0.241657	0.307235	0.243603	S	0.290279	0.418697	0.548387	0.384326	S	match	FALSE
Tb427_030018700	Tb427-030018700	0.23302	0.293441	0.68781	0.481064	S	0.338545	0.471905	0.874248	0.673981	S	match	FALSE
Tb427_000272800:pseudogene	Tb427-000272800:pseudogene	0.0428422	0.0529344	0.0683845	0.04913	S	0.103331	0.123322	0.141607	0.125392	S	match	FALSE
Tb427_110049900	Tb427-110049900	0.282132	0.362486	0.594648	0.458547	S	0.504419	0.617106	0.874248	0.731661	S	match	FALSE
Tb427_070059500	Tb427-070059500	0.0574713	0.0598389	0.0723489	0.0655067	S	0.102651	0.130283	0.15965	0.141066	S	match	FALSE
Tb427_100136400	Tb427-100136400	0.0721003	0.150748	0.333003	0.157625	S	0.150918	0.279463	0.556042	0.281505	S	match	FALSE
Tb427_100052700	Tb427-100052700	0.0783699	0.113924	0.123885	0.0972364	S	0.0978926	0.168076	0.192455	0.162382	S	match	FALSE
Tb427_010008300	Tb427-010008300	0.120167	0.139241	0.235877	0.167861	S	0.173351	0.225758	0.354839	0.293417	S	match	FALSE
Tb427_070068600	Tb427-070068600	0.167189	0.130035	0.344896	0.300921	S	0.298436	0.324217	0.572991	0.529154	S	match	FALSE
Tb427_100140000	Tb427-100140000	0.110763	0.164557	0.288404	0.163767	S	0.154997	0.203879	0.340623	0.225705	S	match	FALSE
Tb427_100073200	Tb427-100073200	0.0679206	0.0828539	0.139742	0.0859775	S	0.118287	0.157136	0.194642	0.161755	S	match	FALSE
Tb427_100069300	Tb427-100069300	0.127482	0.176064	0.261645	0.194473	S	0.269884	0.34908	0.461454	0.35047	S	match	FALSE
Tb427_030022800	Tb427-030022800	0.269592	0.397008	0.811695	0.533265	S	0.422162	0.574341	1.09896	0.696552	S	match	FALSE
Tb427_110120500	Tb427-110120500	0.0710554	0.115075	0.176412	0.101331	S	0.0958532	0.173048	0.266812	0.124765	S	match	FALSE
Tb427_090046700	Tb427-090046700	0.229885	0.375144	0.447968	0.351075	S	0.458872	0.574838	0.753417	0.659561	S	match	FALSE
Tb427_060015700	Tb427-060015700	0.0438871	0.0621404	0.140733	0.110542	S	0.110809	0.159125	0.340077	0.209404	S	match	FALSE
Tb427_060024700	Tb427-060024700	0.092999	0.110472	0.145689	0.114637	S	0.152277	0.16907	0.221979	0.181191	S	match	FALSE
Tb427_090082500	Tb427-090082500	0.523511	0.805524	0.90783	0.747185	S	0.756628	1.14719	1.3614	1.01881	S	match	FALSE
Tb427_080011700	Tb427-080011700	0.102403	0.194476	0.454906	0.224156	S	0.138001	0.286922	0.670312	0.260815	S	match	FALSE
Tb427_020030100	Tb427-020030100	0.0595611	0.0955121	0.122894	0.0910952	S	0.157716	0.264545	0.314926	0.250157	S	match	FALSE
Tb427_100013700	Tb427-100013700	0.0626959	0.0759494	0.099108	0.0900716	S	0.0924541	0.128294	0.156916	0.12163	S	match	FALSE
Tb427_080047300	Tb427-080047300	0.0585162	0.105869	0.134787	0.0767656	S	0.0747791	0.188961	0.276107	0.128527	S	match	FALSE
Tb427_110171600	Tb427-110171600	0.0647858	0.0667434	0.141724	0.106448	S	0.148878	0.22725	0.308912	0.224451	S	match	FALSE
Tb427_050043300	Tb427-050043300	0.0376176	0.0437284	0.0733399	0.0470829	S	0.0455472	0.099453	0.249863	0.0689655	S	match	FALSE
Tb427_100038800	Tb427-100038800	0.282132	0.278481	0.750248	0.426817	S	0.422162	0.55644	0.917988	0.603762	S	match	FALSE
Tb427_100006600	Tb427-100006600	0.0240334	0.0172612	0.0475719	0.0327533	S	0.0237933	0.0273496	0.0557682	0.0351097	S	match	FALSE
Tb427_110060200	Tb427-110060200	0.177638	0.262371	0.349851	0.28045	S	0.305235	0.424167	0.52597	0.467085	S	match	FALSE
Tb427_090067900	Tb427-090067900	0.0668757	0.0678941	0.152626	0.103378	S	0.114208	0.203381	0.350465	0.188715	S	match	FALSE
Tb427_100038900	Tb427-100038900	0.0501567	0.0747986	0.19227	0.11259	S	0.0591434	0.10542	0.18152	0.10094	S	match	FALSE
Tb427_050021300	Tb427-050021300	0.135841	0.340621	0.414272	0.237462	S	0.158396	0.613625	0.666484	0.231348	S	match	FALSE
Tb427_060051600	Tb427-060051600	0.0835946	0.142693	0.198216	0.19652	S	0.155676	0.236201	0.307272	0.250784	S	match	FALSE
Tb427_100039000	Tb427-100039000	0.0282132	0.0356732	0.086224	0.0573183	S	0.0346703	0.0561909	0.106069	0.0514107	S	match	FALSE
Tb427_100130600	Tb427-100130600	0.061651	0.0678941	0.141724	0.107472	S	0.112169	0.161114	0.236741	0.179937	S	match	FALSE
Tb427_110154600	Tb427-110154600	0.118077	0.155351	0.194252	0.160696	S	0.146159	0.186972	0.241115	0.203135	S	match	FALSE
Tb427_050035500	Tb427-050035500	0.0386625	0.0609896	0.0911794	0.0859775	S	0.0632223	0.144207	0.234554	0.109091	S	match	FALSE
Tb427_090022100	Tb427-090022100	0.151515	0.245109	0.468781	0.348004	S	0.218899	0.374938	0.593767	0.340439	S	match	FALSE
Tb427_000276300	Tb427-000276300	0.0867294	0.0978136	0.108028	0.0685773	S	0.0944935	0.134262	0.150355	0.117241	S	match	FALSE
Tb427_110015000	Tb427-110015000	0.266458	0.306099	0.740337	0.438076	S	0.271244	0.527598	1.13231	0.553605	S	match	FALSE
Tb427_040023200	Tb427-040023200	0.556949	0.781358	0.942517	0.755374	S	0.730795	0.954749	1.31547	1.07022	S	match	FALSE
Tb427_110147900	Tb427-110147900	0.0626959	0.0724971	0.167493	0.120778	S	0.0788579	0.125311	0.324768	0.111599	S	match	FALSE
Tb427_110178000	Tb427-110178000	0.835946	1.20483	1.27056	0.984647	S	0.934058	1.33913	1.76873	1.32539	S	match	FALSE
Tb427_110088100	Tb427-110088100	0.101358	0.179517	0.415263	0.23132	S	0.183549	0.259075	0.416074	0.291536	S	match	FALSE
Tb427_030007000	Tb427-030007000	0.136886	0.158803	0.255699	0.177073	S	0.158396	0.200398	0.258065	0.221317	S	match	FALSE
Tb427_100156000	Tb427-100156000	0.319749	0.432681	0.540139	0.420676	S	0.594154	0.810542	1.09677	0.91348	S	match	FALSE
Tb427_010010700	Tb427-010010700	0.306165	0.330265	0.402379	0.32958	S	0.503059	0.607161	0.775834	0.642633	S	match	FALSE
Tb427_070034600	Tb427-070034600	0.113898	0.239356	0.584737	0.337769	S	0.121006	0.324217	0.892291	0.282759	S	match	FALSE
Tb427_080051400	Tb427-080051400	0.113898	0.155351	0.266601	0.221085	S	0.25085	0.314272	0.45708	0.439498	S	match	FALSE
Tb427_050048300	Tb427-050048300	0.119122	0.155351	0.287413	0.227226	S	0.205303	0.275485	0.414434	0.347962	S	match	FALSE
Tb427_100026100	Tb427-100026100	0.347962	0.487917	1.00099	0.733879	S	0.329028	0.591248	0.975943	0.647649	S	match	FALSE
Tb427_070072300	Tb427-070072300	0.22466	0.416571	0.649158	0.379734	S	0.260367	0.535057	0.986878	0.451411	S	match	FALSE
Tb427_110011700	Tb427-110011700	0.320794	0.509781	0.576809	0.483112	S	0.381373	0.486325	0.629852	0.466458	S	match	FALSE
Tb427_080031700	Tb427-080031700	0.0971787	0.119678	0.180377	0.156602	S	0.148199	0.179513	0.260252	0.213793	S	match	FALSE
Tb427_080045400	Tb427-080045400	0.15256	0.295742	0.296333	0.229273	S	0.0516655	0.0716062	0.0918535	0.0721003	S	match	FALSE
Tb427_090068000	Tb427-090068000	0.0376176	0.0563867	0.0832507	0.0501535	S	0.0808973	0.106415	0.15965	0.109718	S	match	FALSE
Tb427_110031900	Tb427-110031900	0.0522466	0.101266	0.317146	0.121801	S	0.0686608	0.14719	0.493712	0.123511	S	match	FALSE
Tb427_110045900	Tb427-110045900	0.242424	0.291139	0.391477	0.360287	S	0.343984	0.461959	0.56807	0.461442	S	match	FALSE
Tb427_110137500	Tb427-110137500	0.061651	0.102417	0.144698	0.0931423	S	0.135962	0.21631	0.305085	0.216301	S	match	FALSE
Tb427_040054500	Tb427-040054500	0.091954	0.119678	0.421209	0.200614	S	0.104691	0.197414	0.643521	0.211912	S	match	FALSE
Tb427_060050300	Tb427-060050300	0.193312	0.310702	0.339941	0.278403	S	0.436438	0.561909	0.724986	0.632602	S	match	FALSE
Tb427_100046400	Tb427-100046400	0.0344828	0.0460299	0.0842418	0.0583419	S	0.0367097	0.0611636	0.111536	0.0664577	S	match	FALSE
Tb427_070069300	Tb427-070069300	0.145246	0.209436	0.380575	0.262027	S	0.227736	0.316758	0.595954	0.392476	S	match	FALSE
Tb427_100112400	Tb427-100112400	0.428422	0.657077	2.18137	1.15455	S	0.394969	1.04575	2.96009	0.855799	S	match	FALSE
Tb427_090038100	Tb427-090038100	0.212121	0.239356	0.314172	0.256909	S	0.278042	0.345102	0.479497	0.35674	S	match	FALSE
Tb427_100112800	Tb427-100112800	0.0219436	0.0310702	0.111001	0.0583419	S	0.0197145	0.0696171	0.15965	0.0526646	S	match	FALSE
Tb427_090016400	Tb427-090016400	0.147335	0.126582	0.377602	0.330604	S	0.0876954	0.131278	0.218152	0.155486	S	match	FALSE
Tb427_100046300	Tb427-100046300	0.0992685	0.13809	0.198216	0.154555	S	0.165874	0.266534	0.346638	0.246395	S	match	FALSE
Tb427_020017300	Tb427-020017300	0.0595611	0.0863061	0.12884	0.11259	S	0.10877	0.156638	0.182613	0.173668	S	match	FALSE
Tb427_100112200	Tb427-100112200	0.124347	0.173763	0.578791	0.327533	S	0.100612	0.294878	0.75287	0.252665	S	match	FALSE
Tb427_110016000	Tb427-110016000	0.203762	0.303797	0.553023	0.446264	S	0.253569	0.305818	0.529798	0.394984	S	match	FALSE
Tb427_110022600	Tb427-110022600	0.0888192	0.130035	0.364718	0.21392	S	0.0890551	0.211338	0.557682	0.194984	S	match	FALSE
Tb427_100112000	Tb427-100112000	0.101358	0.191024	0.645193	0.32651	S	0.10877	0.297862	0.825588	0.279624	S	match	FALSE
Tb427_100078400	Tb427-100078400	0.092999	0.103567	0.204163	0.149437	S	0.159075	0.198409	0.325861	0.259561	S	match	FALSE
Tb427_100067700	Tb427-100067700	0.112853	0.118527	0.444004	0.269191	S	0.159755	0.248633	0.685074	0.319122	S	match	FALSE
Tb427_070032700	Tb427-070032700	0.07628	0.110472	0.280476	0.146366	S	0.0754589	0.176032	0.47895	0.154232	S	match	FALSE
Tb427_110067000	Tb427-110067000	0.23093	0.321059	0.416254	0.275333	S	0.789259	1.1636	1.53581	1.01442	S	match	FALSE
Tb427_050051800	Tb427-050051800	0.0512017	0.0655926	0.106046	0.0859775	S	0.0761387	0.11636	0.136687	0.159875	G2M	no	FALSE
Tb427_110023300	Tb427-110023300	0.0982236	0.155351	0.338949	0.175026	S	0.134602	0.171556	0.343357	0.205643	S	match	FALSE
Tb427_100140800	Tb427-100140800	0.164054	0.187572	0.285431	0.195496	S	0.201903	0.248135	0.317113	0.256426	S	match	FALSE
Tb427_100107500	Tb427-100107500	0.0658307	0.0782509	0.108028	0.09826	S	0.0972128	0.123819	0.160197	0.131034	S	match	FALSE
Tb427_080083400	Tb427-080083400	0.120167	0.10702	0.163528	0.158649	S	0.248131	0.291895	0.436851	0.341066	S	match	FALSE
Tb427_100054100	Tb427-100054100	0.202717	0.238205	0.31219	0.261003	S	0.323589	0.394828	0.591033	0.477743	S	match	FALSE
Tb427_100122700	Tb427-100122700	0.0982236	0.130035	0.170466	0.141249	S	0.21346	0.267529	0.340077	0.273354	S	match	FALSE
Tb427_080010900	Tb427-080010900	0.108673	0.188723	0.201189	0.149437	S	0.158396	0.231726	0.255331	0.183699	S	match	FALSE
Tb427_080007400	Tb427-080007400	0.712644	0.864212	1.95837	1.49028	S	0.976886	1.99254	3.52324	1.93354	S	match	FALSE
Tb427_090064400	Tb427-090064400	0.0522466	0.0805524	0.117939	0.0890481	S	0.127124	0.154649	0.230727	0.173041	S	match	FALSE
Tb427_030027800	Tb427-030027800	0.0961338	0.0909091	0.125867	0.117707	S	0.082257	0.0880159	0.132313	0.0871473	S	match	FALSE
Tb427_110098700	Tb427-110098700	0.137931	0.166858	0.450942	0.264074	S	0.240653	0.318747	0.696009	0.498433	S	match	FALSE
Tb427_110022700	Tb427-110022700	0.014629	0.0425777	0.105055	0.0552712	S	0.10741	0.237195	0.624385	0.228213	S	match	FALSE
Tb427_090034100	Tb427-090034100	0.092999	0.120829	0.34886	0.233367	S	0.154997	0.223769	0.378349	0.263323	S	match	FALSE
Tb427_070054100	Tb427-070054100	0.0355277	0.0448792	0.108028	0.0992835	S	0.0666213	0.0820487	0.254237	0.15674	S	match	FALSE
Tb427_110023500	Tb427-110023500	0.0135841	0.0322209	0.0882061	0.0511771	S	0.0183549	0.0432621	0.0825588	0.0526646	S	match	FALSE
Tb427_110127400	Tb427-110127400	0.077325	0.0747986	0.133796	0.107472	S	0.0897349	0.105917	0.173319	0.15047	S	match	FALSE
Tb427_050052600	Tb427-050052600	0.108673	0.130035	0.416254	0.227226	S	0.244731	0.34908	0.839803	0.490909	S	match	FALSE
Tb427_110023400	Tb427-110023400	0.0553814	0.0736479	0.104063	0.0829069	S	0.132563	0.215813	0.367414	0.23511	S	match	FALSE
Tb427_110015700	Tb427-110015700	0.659352	0.979287	1.30723	0.927329	S	1.276	1.75137	2.26353	1.82508	S	match	FALSE
Tb427_100032500	Tb427-100032500	0.38767	0.521289	0.679881	0.650972	S	0.637661	0.803083	1.02132	0.961129	S	match	FALSE
Tb427_110023600	Tb427-110023600	0.124347	0.209436	0.597621	0.387922	S	0.148878	0.308304	0.757791	0.302194	S	match	FALSE
Tb427_110042400	Tb427-110042400	0.121212	0.161105	0.217047	0.209826	S	0.268525	0.293386	0.428103	0.373041	S	match	FALSE
Tb427_030057200	Tb427-030057200	0.190178	0.186421	0.774034	0.547595	S	0.205982	0.261561	0.799891	0.51348	S	match	FALSE
Tb427_030039700	Tb427-030039700	0.394984	0.626007	0.830525	0.677584	S	0.844324	1.00597	1.42646	1.2627	S	match	FALSE
Tb427_060009100	Tb427-060009100	0.0428422	0.0632911	0.0931615	0.0583419	S	0.0625425	0.0929886	0.135046	0.103448	S	match	FALSE
Tb427_060036900	Tb427-060036900	0.366771	0.35328	1.57384	1.10645	S	0.415364	0.639483	1.75451	0.739812	S	match	FALSE
Tb427_060055300	Tb427-060055300	0.15465	0.151899	0.2111	0.200614	S	0.208702	0.24913	0.316566	0.278997	S	match	FALSE
Tb427_070020300	Tb427-070020300	0.0888192	0.0690449	0.164519	0.139202	S	0.157036	0.130781	0.283215	0.206897	S	match	FALSE
Tb427_060023500	Tb427-060023500	0.0815047	0.117376	0.170466	0.132037	S	0.138001	0.158628	0.242209	0.171787	S	match	FALSE
Tb427_010025200	Tb427-010025200	0.0815047	0.105869	0.143707	0.121801	S	0.162475	0.203879	0.260252	0.24953	S	match	FALSE
Tb427_100051600	Tb427-100051600	0.198537	0.298044	0.406343	0.292733	S	0.425561	0.49826	0.764352	0.648276	S	match	FALSE
Tb427_110152600	Tb427-110152600	0.114943	0.112773	0.259663	0.205732	S	0.2155	0.225758	0.366867	0.28652	S	match	FALSE
Tb427_100079400	Tb427-100079400	0.2372	0.263521	0.286422	0.283521	S	0.314072	0.386872	0.503007	0.447649	S	match	FALSE
Tb427_040048400	Tb427-040048400	0.206897	0.195627	0.350842	0.344933	S	0.360979	0.351566	0.558229	0.533542	S	match	FALSE
Tb427_080007300	Tb427-080007300	0.258098	0.280783	0.733399	0.607984	S	0.346703	0.686723	1.14707	0.709091	S	match	FALSE
Tb427_050009300	Tb427-050009300	0.171369	0.193326	0.270565	0.219038	S	0.218219	0.264048	0.442318	0.351724	S	match	FALSE
Tb427_070059800	Tb427-070059800	0.045977	0.0506329	0.171457	0.168884	S	0.0312712	0.0308304	0.0765446	0.0470219	S	match	FALSE
Tb427_110187000	Tb427-110187000	0.167189	0.256617	0.407334	0.296827	S	0.266485	0.346096	0.686167	0.425078	S	match	FALSE
Tb427_040019600	Tb427-040019600	0.031348	0.027618	0.0782953	0.0450358	S	0.0632223	0.0566882	0.129032	0.0984326	S	match	FALSE
Tb427_110065500	Tb427-110065500	0.182863	0.21519	0.360753	0.272262	S	0.265126	0.318747	0.470202	0.37931	S	match	FALSE
Tb427_070012600	Tb427-070012600	0.273772	0.300345	0.542121	0.441146	S	0.3569	0.504724	0.77146	0.590596	S	match	FALSE
Tb427_070027500	Tb427-070027500	0.0825496	0.0655926	0.282458	0.16479	S	0.0808973	0.0835405	0.290869	0.138558	S	match	FALSE
Tb427_070072400	Tb427-070072400	0.296761	0.325662	0.565907	0.504606	S	0.469748	0.524117	0.917988	0.694671	S	match	FALSE
Tb427_040012800	Tb427-040012800	0.0710554	0.0805524	0.114965	0.104401	S	0.154317	0.198409	0.252597	0.23511	S	match	FALSE
Tb427_080042800	Tb427-080042800	0.0992685	0.150748	0.291378	0.28045	S	0.145479	0.23819	0.373428	0.381818	G2M	no	FALSE
Tb427_070068500	Tb427-070068500	0.0898642	0.153049	0.2111	0.177073	S	0.228416	0.253605	0.322034	0.303448	S	match	FALSE
Tb427_100067900	Tb427-100067900	0.177638	0.186421	0.254708	0.183214	S	0.258328	0.315763	0.416074	0.376176	S	match	FALSE
Tb427_070009500	Tb427-070009500	0.101358	0.0632911	0.473736	0.328557	S	0.152277	0.143212	0.641881	0.323511	S	match	TRUE
Tb427_070041400	Tb427-070041400	0.126437	0.0817031	0.267592	0.214944	S	0.14344	0.176032	0.36304	0.269592	S	match	FALSE
Tb427_110080100	Tb427-110080100	0.0794148	0.0747986	0.125867	0.108495	S	0.129164	0.13824	0.245489	0.199373	S	match	FALSE
Tb427_010029100	Tb427-010029100	1.09613	1.52934	2.16947	1.64074	S	1.57104	2.05967	2.86495	2.41881	S	match	FALSE
Tb427_060019500	Tb427-060019500	0.155695	0.165708	0.314172	0.237462	S	0.237254	0.339135	0.510662	0.406897	S	match	FALSE
Tb427_030033600	Tb427-030033600	0.280042	0.316456	0.716551	0.505629	S	0.492182	0.52909	0.893931	0.778683	S	match	FALSE
Tb427_030016400	Tb427-030016400	0.0950888	0.147296	0.2111	0.145343	S	0.186948	0.275485	0.353198	0.308464	S	match	FALSE
Tb427_110068700	Tb427-110068700	0.184953	0.270426	0.353816	0.340839	S	0.218899	0.304326	0.458174	0.384953	S	match	FALSE
Tb427_030032600	Tb427-030032600	0.314525	0.303797	0.538157	0.495394	S	0.596873	0.612631	0.961728	0.890282	S	match	FALSE
Tb427_110101800	Tb427-110101800	0.296761	0.418872	0.610505	0.5087	S	0.539089	0.619592	0.932203	0.781191	S	match	FALSE
Tb427_070042100	Tb427-070042100	0.0543365	0.0563867	0.119921	0.11259	S	0.0815772	0.0870214	0.174959	0.164263	S	match	FALSE
Tb427_110070500	Tb427-110070500	0.219436	0.132336	0.666006	0.544524	S	0.25085	0.243163	0.846364	0.507837	S	match	TRUE
Tb427_110070600	Tb427-110070600	0.0501567	0.0425777	0.262636	0.116684	S	0.0863358	0.0780706	0.287589	0.142947	S	match	FALSE
Tb427_030031800	Tb427-030031800	0.0898642	0.0782509	0.12884	0.124872	S	0.134602	0.160617	0.258065	0.227586	S	match	FALSE
Tb427_040040200	Tb427-040040200	0.445141	0.469505	0.747275	0.650972	S	0.739633	0.804078	1.35046	1.04702	S	match	FALSE
Tb427_110109800	Tb427-110109800	0.171369	0.191024	0.337958	0.297851	S	0.271244	0.274988	0.45708	0.437618	S	match	FALSE
Tb427_070019900	Tb427-070019900	0.0522466	0.0817031	0.121903	0.0931423	S	0.154997	0.199403	0.264079	0.236991	S	match	FALSE
Tb427_100104100	Tb427-100104100	0.0752351	0.0379747	0.333003	0.184237	S	0.10877	0.0880159	0.336796	0.211912	S	match	FALSE
Tb427_110007100	Tb427-110007100	0.0992685	0.102417	0.147671	0.114637	S	0.101971	0.124814	0.151449	0.144828	S	match	FALSE
Tb427_020027400	Tb427-020027400	0.298851	0.350978	0.48662	0.426817	S	0.566961	0.646445	0.879716	0.7279	S	match	FALSE
Tb427_050028900	Tb427-050028900	0.0794148	0.0932106	0.136769	0.13306	S	0.192386	0.263053	0.341717	0.340439	S	match	FALSE
Tb427_090009000	Tb427-090009000	0.208986	0.240506	0.409316	0.350051	S	0.399048	0.452511	0.645708	0.607524	S	match	FALSE
Tb427_090082800	Tb427-090082800	0.138976	0.150748	0.221011	0.19652	S	0.173351	0.234212	0.311646	0.315361	G2M	no	FALSE
Tb427_110013600	Tb427-110013600	0.208986	0.140391	0.51338	0.432958	S	0.290959	0.216808	0.68398	0.527273	S	match	FALSE
Tb427_060032400:pseudogene	Tb427-060032400:pseudogene	0.0658307	0.110472	0.131814	0.128966	S	0.131883	0.181999	0.238382	0.20627	S	match	FALSE
Tb427_090024900	Tb427-090024900	0.141066	0.176064	0.334985	0.288639	S	0.225697	0.239682	0.399125	0.366771	S	match	FALSE
Tb427_060051300	Tb427-060051300	0.092999	0.0978136	0.147671	0.140225	S	0.158396	0.176032	0.259705	0.236991	S	match	FALSE
Tb427_090070300	Tb427-090070300	0.194357	0.171461	0.308226	0.257932	S	0.258328	0.281452	0.425916	0.384953	S	match	FALSE
Tb427_090052200	Tb427-090052200	0.077325	0.105869	0.141724	0.121801	S	0.0944935	0.102934	0.156916	0.191223	G2M	no	FALSE
Tb427_110166900	Tb427-110166900	0.0835946	0.0609896	0.262636	0.242579	S	0.118287	0.14918	0.355932	0.265204	S	match	FALSE
Tb427_070018600	Tb427-070018600	0.107628	0.163406	0.219029	0.198567	S	0.220258	0.229736	0.342264	0.319749	S	match	FALSE
Tb427_070054700	Tb427-070054700	0.339603	0.342923	0.742319	0.734903	S	0.830048	0.719045	1.23127	1.17429	S	match	FALSE
Tb427_110061900	Tb427-110061900	0.129572	0.180667	0.261645	0.202661	S	0.256968	0.326206	0.417715	0.394984	S	match	FALSE
Tb427_090048600	Tb427-090048600	0.214211	0.214039	0.479683	0.425793	S	0.403127	0.403282	0.6386	0.58558	S	match	FALSE
Tb427_110166800	Tb427-110166800	0.177638	0.0874568	0.829534	0.704197	S	0.21482	0.204873	0.880262	0.603762	S	match	TRUE
Tb427_080050800	Tb427-080050800	0.220481	0.302647	0.535183	0.433982	S	0.5017	0.574341	0.8655	0.8	S	match	FALSE
Tb427_070046400	Tb427-070046400	0.106583	0.136939	0.206145	0.168884	S	0.168593	0.198906	0.314926	0.284013	S	match	FALSE
Tb427_090023500	Tb427-090023500	0.111808	0.142693	0.226957	0.216991	S	0.233175	0.300348	0.408967	0.388715	S	match	FALSE
Tb427_100083500	Tb427-100083500	0.15883	0.226697	0.387512	0.32651	S	0.233175	0.291397	0.473483	0.442633	S	match	FALSE
Tb427_090020600	Tb427-090020600	0.136886	0.109321	0.263627	0.189355	S	0.203943	0.229736	0.346091	0.331661	S	match	FALSE
Tb427_100103800	Tb427-100103800	0.0626959	0.0747986	0.141724	0.0839304	S	0.0958532	0.0959722	0.165118	0.139812	S	match	FALSE
Tb427_070045600	Tb427-070045600	0.0783699	0.0782509	0.140733	0.111566	S	0.192386	0.186474	0.290323	0.273981	S	match	FALSE
Tb427_030053600	Tb427-030053600	0.221526	0.239356	0.374628	0.340839	S	0.289599	0.274988	0.434117	0.428213	S	match	FALSE
Tb427_050038400	Tb427-050038400	0.0606061	0.0874568	0.124876	0.114637	S	0.0781781	0.106415	0.141061	0.132288	S	match	FALSE
Tb427_110082500	Tb427-110082500	0.281087	0.196778	0.581764	0.544524	S	0.448674	0.367976	0.8655	0.816301	S	match	FALSE
Tb427_110160900	Tb427-110160900	0.46604	0.592635	0.906838	0.832139	S	0.599592	0.826952	1.13395	1.10031	S	match	FALSE
Tb427_110110600	Tb427-110110600	0.185998	0.159954	0.305253	0.295803	S	0.271244	0.28543	0.465282	0.432602	S	match	FALSE
Tb427_050036000	Tb427-050036000	0.121212	0.104718	0.370664	0.235415	S	0.192386	0.224267	0.479497	0.349843	S	match	FALSE
Tb427_080084600	Tb427-080084600	0.201672	0.182969	0.333994	0.264074	S	0.172672	0.157136	0.279388	0.256426	S	match	FALSE
Tb427_100109600	Tb427-100109600	0.176594	0.202532	0.281467	0.266121	S	0.281441	0.322725	0.452706	0.394984	S	match	FALSE
Tb427_110142900	Tb427-110142900	0.0700104	0.0955121	0.151635	0.11259	S	0.119646	0.136251	0.237835	0.210658	S	match	FALSE
Tb427_100103900:pseudogene	Tb427-100103900:pseudogene	0.07628	0.0736479	0.139742	0.120778	S	0.114888	0.12183	0.191908	0.189969	S	match	FALSE
Tb427_010011200	Tb427-010011200	0.0355277	0.0287687	0.117939	0.0880246	S	0.0652617	0.0775733	0.220339	0.12163	S	match	FALSE
Tb427_110169800	Tb427-110169800	0.145246	0.202532	0.324083	0.29478	S	0.242012	0.313774	0.433024	0.440752	G2M	no	FALSE
Tb427_100009700	Tb427-100009700	0.0668757	0.0736479	0.164519	0.138178	S	0.0904147	0.126305	0.173866	0.166771	S	match	FALSE
Tb427_080086300:pseudogene	Tb427-080086300:pseudogene	0.0606061	0.0506329	0.105055	0.0921187	S	0.0761387	0.0974639	0.130672	0.118495	S	match	FALSE
Tb427_110119600	Tb427-110119600	0.15883	0.21519	0.252725	0.236438	S	0.227056	0.322725	0.374522	0.346708	S	match	FALSE
Tb427_110109500	Tb427-110109500	0.142111	0.188723	0.343905	0.298874	S	0.280761	0.305321	0.472936	0.430721	S	match	FALSE
Tb427_110128300	Tb427-110128300	0.229885	0.203682	0.40337	0.402252	S	0.346703	0.306315	0.545653	0.547335	G2M	no	FALSE
Tb427_110054300	Tb427-110054300	0.129572	0.202532	0.29336	0.268168	S	0.288239	0.30731	0.504647	0.452665	S	match	FALSE
Tb427_060032300	Tb427-060032300	0.104493	0.101266	0.161546	0.151484	S	0.14276	0.159622	0.238382	0.217555	S	match	FALSE
Tb427_030046000	Tb427-030046000	0.170324	0.161105	0.714569	0.611054	S	0.21414	0.260567	0.673592	0.529781	S	match	FALSE
Tb427_040021200	Tb427-040021200	0.114943	0.130035	0.219029	0.206755	S	0.235894	0.273496	0.376709	0.358621	S	match	FALSE
Tb427_070017300	Tb427-070017300	0.144201	0.193326	0.298315	0.243603	S	0.233175	0.280457	0.377802	0.392476	G2M	no	FALSE
Tb427_010020400	Tb427-010020400	0.0992685	0.133487	0.162537	0.152508	S	0.161115	0.21084	0.241115	0.245141	G2M	no	FALSE
Tb427_110033800	Tb427-110033800	0.091954	0.0943613	0.144698	0.141249	S	0.176071	0.177524	0.255878	0.263323	G2M	no	FALSE
Tb427_110121500	Tb427-110121500	0.184953	0.162255	0.505451	0.475947	S	0.318151	0.286922	0.780755	0.719122	S	match	FALSE
Tb427_110127700	Tb427-110127700	0.247649	0.299194	0.415263	0.354145	S	0.339905	0.424664	0.6386	0.552351	S	match	FALSE
Tb427_040028500	Tb427-040028500	0.0376176	0.0655926	0.0782953	0.0685773	S	0.057104	0.0646445	0.106069	0.0978056	S	match	FALSE
Tb427_110069000	Tb427-110069000	0.194357	0.150748	0.358771	0.334698	S	0.324269	0.300845	0.541826	0.49906	S	match	FALSE
Tb427_100063900:pseudogene	Tb427-100063900:pseudogene	0.0365726	0.0402762	0.0872151	0.073695	S	0.0448674	0.0785679	0.109349	0.0789969	S	match	FALSE
Tb427_080037000	Tb427-080037000	0.361546	0.441887	0.5778	0.481064	S	0.431679	0.589756	0.822307	0.709718	S	match	FALSE
Tb427_100078300	Tb427-100078300	0.434692	0.493671	0.848365	0.660184	S	0.625425	0.78369	1.25533	1.08025	S	match	FALSE
Tb427_060042600	Tb427-060042600	0.0491118	0.0563867	0.11893	0.102354	S	0.0781781	0.090005	0.179333	0.142947	S	match	FALSE
Tb427_090034500	Tb427-090034500	1.24451	1.63636	2.54212	2.33572	S	1.88851	2.28493	3.36741	3.18746	S	match	FALSE
Tb427_110032800	Tb427-110032800	0.149425	0.179517	0.389495	0.342886	S	0.297757	0.38538	0.567523	0.529781	S	match	FALSE
Tb427_090055300	Tb427-090055300	0.123302	0.133487	0.214073	0.198567	S	0.227736	0.302337	0.395298	0.401881	G2M	no	FALSE
Tb427_110176000	Tb427-110176000	0.133751	0.158803	0.224975	0.167861	S	0.208702	0.286922	0.336796	0.335423	S	match	FALSE
Tb427_050017000	Tb427-050017000	0.319749	0.474108	0.727453	0.554759	S	0.60707	0.732969	1.18425	1.07085	S	match	FALSE
Tb427_100110400	Tb427-100110400	0.0982236	0.0667434	0.122894	0.100307	S	0.112169	0.112382	0.177146	0.210031	G2M	no	FALSE
Tb427_110170400	Tb427-110170400	0.15883	0.192175	0.294351	0.273286	S	0.275323	0.30731	0.447239	0.452665	G2M	no	FALSE
Tb427_010020200	Tb427-010020200	0.412748	0.546605	0.973241	0.922211	S	0.524133	0.733466	1.05741	0.983072	S	match	FALSE
Tb427_100152800	Tb427-100152800	0.0501567	0.0368239	0.074331	0.0634596	S	0.0673012	0.0512183	0.0858393	0.0884013	G2M	no	FALSE
Tb427_110037600	Tb427-110037600	0.804598	1.08976	1.96333	1.50972	S	0.89327	1.40278	2.22635	1.8558	S	match	FALSE
Tb427_110170700	Tb427-110170700	0.127482	0.162255	0.173439	0.165814	S	0.196465	0.232223	0.330782	0.300313	S	match	FALSE
Tb427_080068100	Tb427-080068100	0.509927	0.497123	1.40139	1.30399	S	0.752549	0.702138	1.39475	1.33856	S	match	FALSE
Tb427_070011000	Tb427-070011000	0.30721	0.273878	0.499504	0.439099	S	0.402447	0.4182	0.644068	0.651411	G2M	no	FALSE
Tb427_090063900	Tb427-090063900	0.101358	0.0805524	0.227948	0.151484	S	0.163834	0.199403	0.337343	0.347962	G2M	no	FALSE
Tb427_040019100	Tb427-040019100	0.219436	0.271577	0.453915	0.423746	S	0.313392	0.399304	0.542373	0.554232	G2M	no	FALSE
Tb427_070042800	Tb427-070042800	0.189133	0.2313	0.444004	0.348004	S	0.309993	0.330184	0.487698	0.46395	S	match	FALSE
Tb427_110156200	Tb427-110156200	0.0752351	0.0874568	0.156591	0.13306	S	0.147519	0.166087	0.235101	0.229467	S	match	FALSE
Tb427_070076700	Tb427-070076700	0.510972	0.607595	0.909812	0.784033	S	0.634262	0.7454	1.05905	1.02821	S	match	FALSE
Tb427_080048900	Tb427-080048900	0.16092	0.189873	0.318137	0.305015	S	0.233175	0.245152	0.357572	0.335423	S	match	FALSE
Tb427_070072900	Tb427-070072900	0.30512	0.220944	0.80773	0.734903	S	0.338545	0.277971	0.716238	0.639498	S	match	FALSE
Tb427_110124600	Tb427-110124600	0.323929	0.390104	0.765114	0.567042	S	0.449354	0.537046	1.10005	1.01755	S	match	FALSE
Tb427_050051400	Tb427-050051400	0.0731452	0.0609896	0.126858	0.0962129	S	0.14344	0.177524	0.217605	0.223824	G2M	no	FALSE
Tb427_100085400	Tb427-100085400	0.257053	0.301496	0.494549	0.479017	S	0.354181	0.412233	0.594861	0.604389	G2M	no	FALSE
Tb427_040016600	Tb427-040016600	0.0595611	0.0460299	0.120912	0.105425	S	0.131203	0.123819	0.194095	0.221317	G2M	no	FALSE
Tb427_050022700	Tb427-050022700	0.137931	0.181818	0.294351	0.266121	S	0.329708	0.371954	0.551668	0.514734	S	match	FALSE
Tb427_070050500	Tb427-070050500	0.132706	0.174914	0.279485	0.249744	S	0.409245	0.382397	0.630946	0.641379	G2M	no	FALSE
Tb427_090080400	Tb427-090080400	0.178683	0.234753	0.52329	0.366428	S	0.335826	0.393337	0.646255	0.565517	S	match	FALSE
Tb427_030009000	Tb427-030009000	0.684431	0.785961	1.48959	1.22518	S	0.941536	1.2178	2.11919	1.7442	S	match	FALSE
Tb427_040019700	Tb427-040019700	0.155695	0.166858	0.306244	0.295803	S	0.17879	0.245152	0.333516	0.364263	G2M	no	FALSE
Tb427_010020000	Tb427-010020000	0.144201	0.119678	0.389495	0.298874	S	0.195105	0.185977	0.560962	0.543574	S	match	FALSE
Tb427_070032400	Tb427-070032400	0.0825496	0.118527	0.199207	0.17912	S	0.184228	0.195922	0.279388	0.309091	G2M	no	FALSE
Tb427_050022200	Tb427-050022200	0.111808	0.0978136	0.28444	0.234391	S	0.210741	0.192939	0.349918	0.33605	S	match	FALSE
Tb427_090056100	Tb427-090056100	0.294671	0.352129	0.739346	0.665302	S	0.394969	0.469418	0.767633	0.729781	S	match	FALSE
Tb427_100034100	Tb427-100034100	0.286311	0.314154	0.490585	0.454452	S	0.35622	0.426653	0.575724	0.563636	S	match	FALSE
Tb427_080038600	Tb427-080038600	0.229885	0.194476	0.430129	0.345957	S	0.261727	0.252113	0.432477	0.44953	G2M	no	FALSE
Tb427_030010200	Tb427-030010200	0.144201	0.146145	0.288404	0.253838	S	0.256288	0.368971	0.494806	0.487147	S	match	FALSE
Tb427_090082700	Tb427-090082700	0.281087	0.377445	0.474727	0.445241	S	0.437797	0.50721	0.725533	0.70094	S	match	FALSE
Tb427_110142200	Tb427-110142200	0.188088	0.214039	0.292369	0.291709	S	0.241332	0.292889	0.377802	0.415047	G2M	no	FALSE
Tb427_050022600	Tb427-050022600	0.157785	0.189873	0.300297	0.264074	S	0.262407	0.344107	0.461454	0.484013	G2M	no	FALSE
Tb427_040028900	Tb427-040028900	0.231975	0.237054	0.396432	0.376663	S	0.371856	0.463948	0.647348	0.645768	S	match	FALSE
Tb427_110152700	Tb427-110152700	0.392894	0.304948	1.07136	1.00205	S	0.745751	0.714073	1.55276	1.6395	G2M	no	FALSE
Tb427_010006400	Tb427-010006400	0.0825496	0.0874568	0.14668	0.125896	S	0.133243	0.172551	0.242209	0.266458	G2M	no	FALSE
Tb427_060009600	Tb427-060009600	0.262278	0.350978	0.519326	0.495394	S	0.600952	0.674789	0.897212	0.871473	S	match	FALSE
Tb427_110018800	Tb427-110018800	0.244514	0.299194	0.505451	0.457523	S	0.319511	0.37991	0.550574	0.5279	S	match	FALSE
Tb427_110138800	Tb427-110138800	0.396029	0.370541	0.803766	0.712385	S	0.530252	0.506713	0.90596	0.916614	G2M	no	FALSE
Tb427_040028400	Tb427-040028400	0.147335	0.150748	0.219029	0.171955	S	0.205982	0.247141	0.371241	0.346082	S	match	FALSE
Tb427_040030800	Tb427-040030800	0.149425	0.196778	0.416254	0.341863	S	0.305914	0.341621	0.573537	0.597492	G2M	no	FALSE
Tb427_050035000	Tb427-050035000	0.416928	0.532796	1.15659	0.893552	S	0.82121	0.926405	1.51176	1.44326	S	match	FALSE
Tb427_110081300	Tb427-110081300	0.100313	0.124281	0.22002	0.209826	S	0.110809	0.127797	0.175506	0.20815	G2M	no	FALSE
Tb427_110040100	Tb427-110040100	0.195402	0.240506	0.342914	0.324463	S	0.276683	0.369965	0.429196	0.439498	G2M	no	FALSE
Tb427_110141900	Tb427-110141900	0.177638	0.174914	0.260654	0.251791	S	0.222978	0.247638	0.342264	0.387461	G2M	no	FALSE
Tb427_080013600	Tb427-080013600	0.0470219	0.0356732	0.0812686	0.0747185	S	0.165194	0.16907	0.255878	0.29279	G2M	no	FALSE
Tb427_110032600	Tb427-110032600	0.0595611	0.0943613	0.1556	0.131013	S	0.148199	0.178021	0.229634	0.275862	G2M	no	FALSE
Tb427_100135400	Tb427-100135400	0.588297	0.622555	0.981169	0.952917	S	0.293678	0.271507	0.432477	0.474608	G2M	no	FALSE
Tb427_090055700	Tb427-090055700	0.126437	0.139241	0.268583	0.250768	S	0.209381	0.225758	0.320394	0.425078	G2M	no	FALSE
Tb427_100012800	Tb427-100012800	0.15465	0.227848	0.359762	0.278403	S	0.339905	0.377424	0.495353	0.503448	G2M	no	FALSE
Tb427_000277900	Tb427-000277900	0.0689655	0.0621404	0.100099	0.0900716	S	0.0978926	0.091994	0.148168	0.132915	S	match	FALSE
Tb427_030014700	Tb427-030014700	0.371996	0.388953	0.483647	0.385875	S	0.0543848	0.0397812	0.0448332	0.0526646	Early G1	no	FALSE
Tb427_030058600	Tb427-030058600	0.229885	0.203682	0.314172	0.283521	S	0.256968	0.337643	0.378896	0.458307	G2M	no	FALSE
Tb427_040013900	Tb427-040013900	0.00417973	0.00805524	0.011893	0.00307062	S	0.0339905	0.033814	0.0557682	0.0658307	G2M	no	FALSE
Tb427_060037800	Tb427-060037800	0.077325	0.0886076	0.126858	0.11566	S	0.0808973	0.082546	0.11427	0.128527	G2M	no	FALSE
Tb427_070013600	Tb427-070013600	0.0397074	0.0322209	0.0723489	0.0542477	S	0.0842964	0.0835405	0.129579	0.126019	S	match	FALSE
Tb427_070041100	Tb427-070041100	0.14838	0.109321	0.198216	0.18219	S	0.21278	0.208354	0.282121	0.282132	G2M	no	FALSE
Tb427_080029800	Tb427-080029800	0.270637	0.289988	0.444995	0.397134	S	0.189667	0.214818	0.299071	0.273354	S	match	FALSE
Tb427_080057000:pseudogene	Tb427-080057000:pseudogene	0.130617	0.140391	0.184341	0.175026	S	0.187627	0.219294	0.284855	0.281505	S	match	FALSE
Tb427_080057600	Tb427-080057600	0.104493	0.0920598	0.151635	0.144319	S	0.14344	0.155644	0.184254	0.224451	G2M	no	FALSE
Tb427_090017300	Tb427-090017300	0.141066	0.118527	0.170466	0.165814	S	0.158396	0.13277	0.186441	0.198746	G2M	no	FALSE
Tb427_100059800	Tb427-100059800	0.104493	0.119678	0.156591	0.150461	S	0.145479	0.146196	0.208857	0.216928	G2M	no	FALSE
Tb427_100079100	Tb427-100079100	0.0626959	0.0368239	0.10109	0.0849539	S	0.123725	0.124316	0.212138	0.216928	G2M	no	FALSE
Tb427_100150600	Tb427-100150600	0.132706	0.117376	0.189296	0.187308	S	0.144799	0.147688	0.209951	0.238871	G2M	no	FALSE
Tb427_110076700	Tb427-110076700	0.0971787	0.115075	0.182359	0.139202	S	0.200544	0.20189	0.264079	0.302194	G2M	no	FALSE
Tb427_110147200	Tb427-110147200	0.0721003	0.0644419	0.16551	0.152508	S	0.112848	0.0929886	0.13778	0.164263	G2M	no	FALSE
Tb427_110188600	Tb427-110188600	0.119122	0.125432	0.204163	0.202661	S	0.197145	0.222775	0.299071	0.297806	S	match	FALSE

## Sheet: Orthogroups
Conservation of cell cycle regulated and non-regulated gene orthologs. Orthologs are taken from Oldrieve et al Biol Open. 2022.
cell cycle regulated (B) indicated if genes from orthogroup were classified as CCR by scRNA-seq in BSF and PCF.
"Single copy orthologue" indicates if orthologroup has one gene per genome. "Single copy orthologue and essential" those all deemed essential by RIT-seq phenotypic screening (Alsford et al Genome Res 2011)
columns H - AY list genes for each othrogroup across each reference genome.
AZ- CQ list the number of genes per orthogroup across each reference genome
Column CR "Total" - total genes across species per orthogroup
Column CS "Missing species" - number of species without genes of each orthogroup
Column CT "Tree length" - Tree length for each orthogroup calcuclated with FastME, indicating genetic conservation or divergance across species
Orthogroup	cell cycle regulated?	Single copy orthologue	Single copy orthologue and essential (RITseq )	Interproscan domain annotation	Assocaiated GO terms	PFAM domain annotation	BayalaiB08-376	BsaltansLakeKonstanz	CfasciculataCfCl	EmonterogeiiLV88	LaethiopicaL147	LamazonensisMHOMBR71973M2269	LarabicaLEM1108	LbraziliensisMHOMBR75M2903	LbraziliensisMHOMBR75M2904_2019	LdonovaniBPK282A1	LdonovaniCL-SL	LdonovaniLV9	LenriettiiLEM3045	LgerbilliLEM452	LinfantumJPCM5	LmajorFriedlin	LmajorLV39c5	LmajorSD75.1	LmexicanaMHOMGT2001U1103	LpanamensisMHOMCOL81L13	LpanamensisMHOMPA94PSC1	LpyrrhocorisH10	LseymouriATCC30220	LspMARLEM2494	LtarentolaeParrotTarII	LtropicaL590	LturanicaLEM423	PconfusumCUL13	PspEM1	TbruceiLister427_2018	TbruceiTREU927	TbruceigambienseDAL972	TcongolenseIL3000_2019	TcruziBrazilA4	TcruziDm28c2017	TcruziSylvioX10-1-2012	TcruziYC6	TcruzimarinkelleiB7	TevansiSTIB805	TgrayiANR4	Tmelophagium	TrangeliSC58	Ttheileri
OG0000002	Yes	No	No	Domain Adenylyl cyclase class-3/4/guanylyl cyclase	intracellular signal transduction	Adenylate and Guanylate cyclase catalytic domain	Baya_145_0120	BSAL_40020, BSAL_46000, BSAL_66595, BSAL_73635, BSAL_84110	CFAC1_090006500, CFAC1_090006600, CFAC1_090006700, CFAC1_090006800, CFAC1_090007500, CFAC1_090007800	EMOLV88_000007900, EMOLV88_000008000, EMOLV88_000017000, EMOLV88_000018400, EMOLV88_000018700, EMOLV88_000023000, EMOLV88_000025600, EMOLV88_000026500, EMOLV88_000030900, EMOLV88_000034300, EMOLV88_000035000, EMOLV88_000036100, EMOLV88_000039100, EMOLV88_000039400, EMOLV88_000041000, EMOLV88_000044400, EMOLV88_000053000, EMOLV88_000053900, EMOLV88_170005000, EMOLV88_170005100, EMOLV88_170005200, …	LAEL147_000009100, LAEL147_000242800, LAEL147_000243000	LAMA_000259400, LAMA_000259700	LARLEM1108_170005900, LARLEM1108_170006000, LARLEM1108_170006300, LARLEM1108_170006400, LARLEM1108_170006500, LARLEM1108_170006600		LbrM.17.2.204890_pseudogene, LbrM.17.2.204900_pseudogene, LbrM.17.2.204910_pseudogene, LbrM.17.2.204920_pseudogene, LbrM.17.2.204930_pseudogene, LbrM.17.2.204940_pseudogene	LdBPK_170120.1, LdBPK_170130.1, LdBPK_170140.1	LdCL_170007000, LdCL_170007200, LdCL_170007300, LdCL_170007400, LdCL_170007500	LdLV9.17.2.204190_pseudogene, LdLV9.17.2.204200_pseudogene, LdLV9.17.2.204210_pseudogene, LdLV9.17.2.204220_pseudogene	LENLEM3045_000036300, LENLEM3045_170006100	LGELEM452_170005900, LGELEM452_170006000, LGELEM452_170006100	LINF_170007300, LINF_170007400, LINF_170007500, LINF_170007600, LINF_170007700, LINF_170007800	LmjF.17.0180, LmjF.17.0190, LmjF.17.0200, LmjF.17.0230, LmjF.17.0235, LmjF.17.0237	LMJLV39_170006100, LMJLV39_170006500, LMJLV39_170006700, LMJLV39_170006800, LMJLV39_170006900, LMJLV39_170007000, LMJLV39_170007100	LMJSD75_170006400, LMJSD75_170006700, LMJSD75_170006800	LmxM.17.0190, LmxM.17.0190partial, LmxM.17.0191, LmxM.17.0200, LmxM.17.0235, LmxM.17.0236, LmxM.17.0237	LPAL13_170005100, LPAL13_170006200, LPAL13_170006300, LPAL13_170006400, LPAL13_170006500	LPMP_170090, LPMP_170100, LPMP_170110	LpyrH10_08_2930, LpyrH10_08_2940, LpyrH10_08_2950, LpyrH10_21_0010, LpyrH10_27_0380, LpyrH10_45_0050, LpyrH10_51_0020	Lsey_0438_0010, Lsey_1059_0010	LMARLEM2494_000018100, LMARLEM2494_170005900, LMARLEM2494_170007100	LtaP17.0110, LtaP17.0120, LtaP17.0130, LtaP17.0140, LtaP17.0150, LtaP17.0160, LtaP17.0170, LtaP35.0470	LTRL590_170005900	LTULEM423_170006000, LTULEM423_170006100, LTULEM423_170006200	PCON_0023170	CCW65857.1	Tb427_000006400, Tb427_000006700, Tb427_000008900, Tb427_000010000, Tb427_000011500, Tb427_000013400_pseudogene, Tb427_000014700, Tb427_000015300, Tb427_000016700, Tb427_000019600_pseudogene, Tb427_000020900, Tb427_000022800, Tb427_000024700, Tb427_000144500, Tb427_000174300_pseudogene, Tb427_000484000, Tb427_000720500_pseudogene, Tb427_000728300_pseudogene, Tb427_000728400, Tb427_000728500, Tb42…	Tb05.5K5.180, Tb05.5K5.190, Tb09.v4.0009, Tb11.v5.0217, Tb11.v5.0379, Tb11.v5.0380, Tb11.v5.0424, Tb11.v5.0425, Tb11.v5.0429, Tb11.v5.0431, Tb11.v5.0456, Tb11.v5.0470, Tb11.v5.0484, Tb11.v5.0546, Tb11.v5.0576, Tb11.v5.0654, Tb11.v5.0821, Tb11.v5.0830, Tb11.v5.0864, Tb11.v5.0865, Tb11.v5.1015, Tb927.10.13040, Tb927.10.16000, Tb927.10.16190, Tb927.10.2430, Tb927.11.140, Tb927.11.150, Tb927.11.17040…	Tbg972.10.15760, Tbg972.10.19580, Tbg972.10.19590, Tbg972.10.19830, Tbg972.10.19920, Tbg972.10.2990, Tbg972.11.10, Tbg972.11.19250, Tbg972.11.6690, Tbg972.4.3790, Tbg972.4.3940, Tbg972.4.3950, Tbg972.4.3960, Tbg972.4.3970, Tbg972.4.3980, Tbg972.4.3990, Tbg972.4.4510, Tbg972.4.4520, Tbg972.4.4530, Tbg972.4.4540, Tbg972.4.4550, Tbg972.4.4560, Tbg972.4.4570, Tbg972.4.4580, Tbg972.5.10, Tbg972.5.1970…	TcIL3000.A.H_000005400_pseudogene, TcIL3000.A.H_000006100_pseudogene, TcIL3000.A.H_000028400_pseudogene, TcIL3000.A.H_000045900_pseudogene, TcIL3000.A.H_000046000, TcIL3000.A.H_000046100, TcIL3000.A.H_000053400_pseudogene, TcIL3000.A.H_000053500_pseudogene, TcIL3000.A.H_000064400_pseudogene, TcIL3000.A.H_000070900_pseudogene, TcIL3000.A.H_000073000, TcIL3000.A.H_000073100, TcIL3000.A.H_000087400_…	TcBrA4_0033560, TcBrA4_0033600, TcBrA4_0033610, TcBrA4_0033620, TcBrA4_0042420, TcBrA4_0042470, TcBrA4_0042480, TcBrA4_0042530, TcBrA4_0042570, TcBrA4_0042580, TcBrA4_0049200, TcBrA4_0049210, TcBrA4_0049220, TcBrA4_0050450, TcBrA4_0050480, TcBrA4_0050690, TcBrA4_0052820, TcBrA4_0052830, TcBrA4_0053230, TcBrA4_0053740, TcBrA4_0053780, TcBrA4_0053930, TcBrA4_0058650, TcBrA4_0058660, TcBrA4_0058670,…	BCY84_00428, BCY84_00432, BCY84_03350, BCY84_03528, BCY84_04549, BCY84_04551, BCY84_11323, BCY84_11329, BCY84_11333, BCY84_14628, BCY84_14629, BCY84_14630, BCY84_15588, BCY84_18135, BCY84_18143, BCY84_18146, BCY84_18150, BCY84_18236, BCY84_18257, BCY84_18259, BCY84_18261, BCY84_18263, BCY84_18265, BCY84_19496, BCY84_19498, BCY84_19500, BCY84_19502, BCY84_21617, BCY84_21619, BCY84_21647, BCY84_216…	TCSYLVIO_000093, TCSYLVIO_000486, TCSYLVIO_000736, TCSYLVIO_000806, TCSYLVIO_002938, TCSYLVIO_002939, TCSYLVIO_004079, TCSYLVIO_004080, TCSYLVIO_004081, TCSYLVIO_004082, TCSYLVIO_004084, TCSYLVIO_004256, TCSYLVIO_004640, TCSYLVIO_004641, TCSYLVIO_007683, TCSYLVIO_007711, TCSYLVIO_008230, TCSYLVIO_008675, TCSYLVIO_008778, TCSYLVIO_009380, TCSYLVIO_009773, TCSYLVIO_009830, TCSYLVIO_009919, TCSYLVIO…	TcYC6_0015740, TcYC6_0051420, TcYC6_0051460, TcYC6_0051510, TcYC6_0051730, TcYC6_0051750, TcYC6_0051770, TcYC6_0051800, TcYC6_0073060, TcYC6_0073070, TcYC6_0073080, TcYC6_0106690, TcYC6_0106790, TcYC6_0106820, TcYC6_0107100, TcYC6_0107130, TcYC6_0107150, TcYC6_0107600, TcYC6_0108680, TcYC6_0108690, TcYC6_0108700, TcYC6_0108730, TcYC6_0108780, TcYC6_0108790, TcYC6_0108830, TcYC6_0108910, TcYC6_010…	Tc_MARK_10024, Tc_MARK_10072, Tc_MARK_10113, Tc_MARK_10115, Tc_MARK_10348, Tc_MARK_1772, Tc_MARK_2023, Tc_MARK_2826, Tc_MARK_2827, Tc_MARK_3063, Tc_MARK_3064, Tc_MARK_4204, Tc_MARK_4205, Tc_MARK_6602, Tc_MARK_6603, Tc_MARK_6605, Tc_MARK_6956, Tc_MARK_7793, Tc_MARK_7861, Tc_MARK_79, Tc_MARK_7977, Tc_MARK_8005, Tc_MARK_805, Tc_MARK_8112, Tc_MARK_8170, Tc_MARK_8254, Tc_MARK_8411, Tc_MARK_8434, Tc_MA…	TevSTIB805.10.13690, TevSTIB805.10.16840, TevSTIB805.10.17050, TevSTIB805.10.2610, TevSTIB805.11_01.1470, TevSTIB805.11_01.17620, TevSTIB805.11_01.60, TevSTIB805.11_01.6150, TevSTIB805.11_01.70, TevSTIB805.4.3920, TevSTIB805.4.4040, TevSTIB805.4.4050, TevSTIB805.4.4060, TevSTIB805.4.4590, TevSTIB805.4.4600, TevSTIB805.4.4610, TevSTIB805.4.4620, TevSTIB805.4.4630, TevSTIB805.4.4640, TevSTIB805.4.4…	DQ04_00961000, DQ04_02121000, DQ04_02911070, DQ04_05881000, DQ04_06091000, DQ04_08541040, DQ04_08651000, DQ04_08651040, DQ04_11281000, DQ04_11311000, DQ04_11311010, DQ04_11581000, DQ04_12461020, DQ04_12501010, DQ04_14521030, DQ04_14741000, DQ04_14741010, DQ04_15021000, DQ04_15141000, DQ04_15141010, DQ04_15531020, DQ04_16791000, DQ04_16791010, DQ04_17331000, DQ04_17501000, DQ04_18091010, DQ04_1842…	jg2020.t1, jg2021.t1, jg2023.t1, jg2024.t1, jg2025.t1, jg2026.t1, jg2029.t1, jg2030.t1, jg2064.t1, jg2065.t1, jg2066.t1, jg493.t1, jg495.t1	TRSC58_01701, TRSC58_03414, TRSC58_06059, TRSC58_06471, TRSC58_07008, TRSC58_07015, TRSC58_07036, TRSC58_07134, TRSC58_07140, TRSC58_07158	Tth.142.1010, Tth.142.1020, Tth.26.1000, Tth.26.1030, Tth.26.1040, Tth.26.1050, Tth.26.1060, Tth.26.1070, Tth.26.1090, Tth.26.1100, Tth.26.1110, Tth.26.1120, Tth.26.1130, Tth.26.1150, Tth.26.1160, Tth.26.1170, Tth.26.1180, Tth.26.1200, Tth.26.1210, Tth.26.1230, Tth.26.1240, Tth.26.1250, Tth.26.1260, Tth.26.1370, Tth.41.1180, Tth.41.1190, Tth.41.1200, Tth.41.1650, Tth.41.1660, Tth.41.1680, Tth.66.…
OG0000007	Yes	No	No	Domain Amino acid transporter, transmembrane domain	NA	Transmembrane amino acid transporter protein	Baya_039_0310, Baya_045_0220, Baya_045_0400, Baya_120_0020, Baya_230_0030		CFAC1_270013300, CFAC1_270013600, CFAC1_270013800, CFAC1_270020500, CFAC1_270020600, CFAC1_270020700, CFAC1_270020800, CFAC1_270020900, CFAC1_270021000, CFAC1_270036800, CFAC1_270036900, CFAC1_270037000	EMOLV88_000027400, EMOLV88_000059800, EMOLV88_310010200, EMOLV88_310010500, EMOLV88_310023300, EMOLV88_310023400	LAEL147_000015800, LAEL147_000592100	LAMA_000628100, LAMA_000628400, LAMA_000631500_pseudogene	LARLEM1108_310011400, LARLEM1108_310011500, LARLEM1108_310025600	LBRM2903_000006400, LBRM2903_310014200, LBRM2903_310014500, LBRM2903_310017700, LBRM2903_310029200, LBRM2903_310029300, LBRM2903_310029700, LBRM2903_310029900	LbrM.07.2.001240_pseudogene, LbrM.31.2.000440_pseudogene, LbrM.31.2.002020_pseudogene, LbrM.31.2.209500_pseudogene, LbrM.31.2.209510_pseudogene, LbrM.31.2.209610_pseudogene, LbrM.31.2.209620_pseudogene	LdBPK_310590.1, LdBPK_310600.1, LdBPK_311830.1, LdBPK_311850.1, LdBPK_311860.1	LdCL_310011400, LdCL_310011700, LdCL_310025400, LdCL_310025500, LdCL_310025800, LdCL_310025900, LdCL_310026000	LdBPK.31.2.000370_pseudogene, LdBPK.31.2.000590_pseudogene, LdLV9.31.2.207510_pseudogene, LdLV9.31.2.207740_pseudogene, LdLV9.31.2.207750_pseudogene, LdLV9.31.2.207760_pseudogene	LENLEM3045_000031800, LENLEM3045_000039200, LENLEM3045_310008800	LGELEM452_310011000, LGELEM452_310014200	LINF_310011100, LINF_310011400, LINF_310025250, LINF_310025300, LINF_310025550, LINF_310025600	LmjF.31.0570, LmjF.31.0870, LmjF.31.0880, LmjF.31.1790, LmjF.31.1800, LmjF.31.1820	LMJLV39_000016000, LMJLV39_000019700, LMJLV39_310011200, LMJLV39_310025900, LMJLV39_310026000, LMJLV39_310026100	LMJSD75_310010900, LMJSD75_310014300, LMJSD75_310014400, LMJSD75_310025400, LMJSD75_310025500	LmxM.30.0570, LmxM.30.0571, LmxM.30.1800, LmxM.30.1800a, LmxM.30.1820	LPAL13_000005800, LPAL13_000030300, LPAL13_310010500, LPAL13_310010800, LPAL13_310023300	LPMP_310550, LPMP_310560, LPMP_310840, LPMP_310850, LPMP_311700	LpyrH10_12_0870, LpyrH10_12_0880, LpyrH10_12_0890, LpyrH10_12_0900, LpyrH10_12_2140, LpyrH10_12_2150, LpyrH10_12_2160, LpyrH10_12_2170, LpyrH10_12_2180, LpyrH10_32_0450, LpyrH10_32_0460, LpyrH10_32_0480, LpyrH10_32_0500, LpyrH10_32_0520	Lsey_0007_0170, Lsey_0007_0180, Lsey_0007_0200, Lsey_0225_0070, Lsey_0424_0020	LMARLEM2494_000011300, LMARLEM2494_310008600	LtaP31.0590	LTRL590_310010900, LTRL590_310011700, LTRL590_310015200	LTULEM423_310010900, LTULEM423_310014200	PCON_0062450	CCW59552.1, CCW59553.1, CCW65178.1, CCW65204.1, CCW65408.1	Tb427_040042800, Tb427_040042900, Tb427_040050800, Tb427_040051800, Tb427_040051900, Tb427_040052000, Tb427_040052100_pseudogene, Tb427_080081800, Tb427_080081900, Tb427_080082000, Tb427_080082100, Tb427_080082200, Tb427_080082300_pseudogene, Tb427_080082400, Tb427_080082500_pseudogene, Tb427_080082600_pseudogene, Tb427_080082700_pseudogene, Tb427_080082800, Tb427_080082900, Tb427_080083000, Tb42…	Tb11.v5.0540, Tb11.v5.0541, Tb927.10.6500, Tb927.11.15950, Tb927.11.15960, Tb927.4.3990, Tb927.4.4000, Tb927.4.4010, Tb927.4.4020, Tb927.4.4730, Tb927.4.4820, Tb927.4.4830, Tb927.4.4840, Tb927.4.4850, Tb927.4.4860, Tb927.4.4870, Tb927.8.7600, Tb927.8.7610, Tb927.8.7620, Tb927.8.7630, Tb927.8.7640, Tb927.8.7650, Tb927.8.7660, Tb927.8.7670, Tb927.8.7680, Tb927.8.7690, Tb927.8.7700, Tb927.8.7740, Tb…	Tbg972.10.7950, Tbg972.11.17880, Tbg972.11.17890, Tbg972.4.4120, Tbg972.4.4130, Tbg972.4.4890, Tbg972.4.4990, Tbg972.4.5000, Tbg972.4.5010, Tbg972.4.5020, Tbg972.8.7890, Tbg972.8.7900, Tbg972.8.7910, Tbg972.8.7920, Tbg972.8.7930, Tbg972.8.7990, Tbg972.8.8630, Tbg972.8.8640	TcIL3000.A.H_000144300, TcIL3000.A.H_000144400, TcIL3000.A.H_000144500_pseudogene, TcIL3000.A.H_000173100_pseudogene, TcIL3000.A.H_000173200, TcIL3000.A.H_000173300, TcIL3000.A.H_000173400, TcIL3000.A.H_000173500, TcIL3000.A.H_000173600, TcIL3000.A.H_000173700, TcIL3000.A.H_000173800_pseudogene, TcIL3000.A.H_000173900_pseudogene, TcIL3000.A.H_000186700, TcIL3000.A.H_000186800_pseudogene, TcIL3000…	TcBrA4_0017160, TcBrA4_0032430, TcBrA4_0032570, TcBrA4_0032580, TcBrA4_0032600, TcBrA4_0032610, TcBrA4_0032620, TcBrA4_0032640, TcBrA4_0032680, TcBrA4_0032690, TcBrA4_0032700, TcBrA4_0032880, TcBrA4_0034640, TcBrA4_0034730, TcBrA4_0034740, TcBrA4_0035160, TcBrA4_0050240, TcBrA4_0050250, TcBrA4_0050260, TcBrA4_0050270, TcBrA4_0050280, TcBrA4_0053420, TcBrA4_0053440, TcBrA4_0053460, TcBrA4_0053470,…	BCY84_00228, BCY84_00229, BCY84_00230, BCY84_00231, BCY84_00232, BCY84_00233, BCY84_00253, BCY84_00254, BCY84_00255, BCY84_00256, BCY84_00257, BCY84_08345, BCY84_10358, BCY84_10359, BCY84_10360, BCY84_10363, BCY84_10364, BCY84_10365, BCY84_10366, BCY84_10367, BCY84_10368, BCY84_10369, BCY84_10386, BCY84_10391, BCY84_10392, BCY84_10393, BCY84_10396, BCY84_10397, BCY84_10398, BCY84_10399, BCY84_104…	TCSYLVIO_002820, TCSYLVIO_002821, TCSYLVIO_002886, TCSYLVIO_002888, TCSYLVIO_002889, TCSYLVIO_002895, TCSYLVIO_004970, TCSYLVIO_005391, TCSYLVIO_008592, TCSYLVIO_009551, TCSYLVIO_010159	TcYC6_0026750, TcYC6_0026760, TcYC6_0026770, TcYC6_0026780, TcYC6_0026790, TcYC6_0026800, TcYC6_0026820, TcYC6_0050820, TcYC6_0106040, TcYC6_0106190, TcYC6_0126340	Tc_MARK_1600, Tc_MARK_1606, Tc_MARK_3407, Tc_MARK_3718, Tc_MARK_6617, Tc_MARK_7785, Tc_MARK_8358, Tc_MARK_8693	TevSTIB805.10.6870, TevSTIB805.11_01.16500, TevSTIB805.11_01.16510, TevSTIB805.4.4170, TevSTIB805.4.4180, TevSTIB805.4.4190, TevSTIB805.4.4200, TevSTIB805.4.4910, TevSTIB805.4.5010, TevSTIB805.4.5020, TevSTIB805.4.5030, TevSTIB805.4.5040, TevSTIB805.4.5050, TevSTIB805.4.5060, TevSTIB805.8.7990, TevSTIB805.8.8000, TevSTIB805.8.8010, TevSTIB805.8.8020, TevSTIB805.8.8030, TevSTIB805.8.8040, TevSTIB8…	DQ04_02651100, DQ04_03051110, DQ04_08581000, DQ04_09511020, DQ04_12531010, DQ04_13491000, DQ04_14361010, DQ04_19011000	jg3720.t1, jg9473.t1	TRSC58_01784, TRSC58_02798, TRSC58_03757, TRSC58_03764, TRSC58_04186, TRSC58_05036, TRSC58_06425, TRSC58_06568, TRSC58_06802, TRSC58_06871, TRSC58_06919, TRSC58_07077, TRSC58_07114, TRSC58_07131, TRSC58_07177	Tth.178.1030, Tth.2.3070, Tth.22.1550, Tth.26.1860, Tth.26.1870, Tth.26.2100, Tth.26.2120
OG0000011	Yes	No	No	Domain Peptidase M20, dimerisation domain	hydrolase activity	Peptidase dimerisation domain	Baya_070_0130, Baya_070_0140, Baya_200_0050	BSAL_93740	CFAC1_080006200, CFAC1_080006300, CFAC1_080009200, CFAC1_080009300, CFAC1_080009400, CFAC1_150028900, CFAC1_200022600, CFAC1_200022700, CFAC1_200022800, CFAC1_270037100, CFAC1_270037200, CFAC1_270037700, CFAC1_270046900, CFAC1_270047000, CFAC1_270060500, CFAC1_270060600, CFAC1_270060700, CFAC1_270060800, CFAC1_270060900, CFAC1_270061000, CFAC1_270063000, CFAC1_270063100, CFAC1_270063200, CFAC1_28…	EMOLV88_070007900, EMOLV88_360058200	LAEL147_000087200, LAEL147_000089900, LAEL147_000532200, LAEL147_000605100, LAEL147_000607300, LAEL147_000616400, LAEL147_000616500	LAMA_000087600, LAMA_000090300, LAMA_000112700	LARLEM1108_070005600, LARLEM1108_070008400, LARLEM1108_290023000, LARLEM1108_310025400, LARLEM1108_310027900, LARLEM1108_310037500	LBRM2903_070008300, LBRM2903_290023600, LBRM2903_310041300, LBRM2903_350071600	LbrM.07.2.000031_pseudogene, LbrM.07.2.000280, LbrM.29.2.001660, LbrM.31.2.003140_pseudogene	LdBPK_070040.1, LdBPK_070430.1, LdBPK_291680.1, LdBPK_311840.1, LdBPK_312880.1	LdCL_070005300, LdCL_070007800, LdCL_290022400, LdCL_310025600	LdBPK.07.2.000040, LdBPK.07.2.000430, LdBPK.31.2.001840, LdLV9.29.2.206900	LENLEM3045_000023500, LENLEM3045_000031900, LENLEM3045_070005600, LENLEM3045_070005700, LENLEM3045_070008400, LENLEM3045_290022200, LENLEM3045_290022300	LGELEM452_070005500, LGELEM452_070008400, LGELEM452_290023100, LGELEM452_310026400	LINF_070005300, LINF_070007900, LINF_290022300, LINF_310025400, LINF_310036550	LmjF.07.0030, LmjF.07.0270, LmjF.29.1570, LmjF.31.1810, LmjF.31.2785	LMJLV39_000015800, LMJLV39_070005600, LMJLV39_070008600, LMJLV39_290022600, LMJLV39_310028500, LMJLV39_310038400	LMJSD75_070005600, LMJSD75_070008800, LMJSD75_290023100, LMJSD75_310025700, LMJSD75_310028600, LMJSD75_310038400	LmxM.07.0030, LmxM.07.0270, LmxM.08_29.1570	LPAL13_070008000, LPAL13_290020400, LPAL13_310034400	LPMP_070050, LPMP_070300, LPMP_291620, LPMP_312500, LPMP_312640	LpyrH10_06_3670, LpyrH10_06_3680, LpyrH10_08_1880, LpyrH10_12_0560, LpyrH10_12_0570, LpyrH10_12_0850, LpyrH10_12_0860, LpyrH10_29_0710, LpyrH10_29_0900, LpyrH10_39_0020, LpyrH10_39_0030, LpyrH10_39_0310, LpyrH10_46_0010	Lsey_0049_0250, Lsey_0171_0230, Lsey_0210_0150, Lsey_0221_0020, Lsey_0382_0030, Lsey_0424_0030, Lsey_0515_0010, Lsey_0515_0020	LMARLEM2494_000013800, LMARLEM2494_000013900, LMARLEM2494_000020300, LMARLEM2494_070008000	LtaP07.0270, LtaP29.1710, LtaP31.2420	LTRL590_000018400, LTRL590_070005400, LTRL590_070008300, LTRL590_290022500, LTRL590_310027400, LTRL590_310041800	LTULEM423_070005600, LTULEM423_070008100, LTULEM423_290022500, LTULEM423_310036100	PCON_0035980		Tb427_080021900	Tb927.8.1910	Tbg972.8.1550	TcIL3000.A.H_000048500	TcBrA4_0000370, TcBrA4_0007890, TcBrA4_0034590, TcBrA4_0034650, TcBrA4_0034660, TcBrA4_0034670, TcBrA4_0034680, TcBrA4_0034750, TcBrA4_0034760, TcBrA4_0034770, TcBrA4_0034790, TcBrA4_0034800, TcBrA4_0034810, TcBrA4_0034820, TcBrA4_0038360, TcBrA4_0038370, TcBrA4_0038390, TcBrA4_0038400, TcBrA4_0038430, TcBrA4_0038470, TcBrA4_0040790, TcBrA4_0040810, TcBrA4_0040840, TcBrA4_0040870, TcBrA4_0040900,…	BCY84_00150, BCY84_00151, BCY84_00152, BCY84_00153, BCY84_00154, BCY84_00155, BCY84_00156, BCY84_00157, BCY84_00158, BCY84_00159, BCY84_00160, BCY84_00161, BCY84_00162, BCY84_00163, BCY84_00164, BCY84_00165, BCY84_00166, BCY84_00167, BCY84_00168, BCY84_00169, BCY84_00171, BCY84_00172, BCY84_00173, BCY84_00174, BCY84_00175, BCY84_00176, BCY84_00177, BCY84_00178, BCY84_00179, BCY84_00180, BCY84_001…	TCSYLVIO_000325, TCSYLVIO_000349, TCSYLVIO_000710, TCSYLVIO_000741, TCSYLVIO_000743, TCSYLVIO_002881, TCSYLVIO_007760, TCSYLVIO_009823, TCSYLVIO_010189	TcYC6_0099140, TcYC6_0099560, TcYC6_0105760, TcYC6_0105770, TcYC6_0105780, TcYC6_0105790, TcYC6_0105800, TcYC6_0105810, TcYC6_0105820, TcYC6_0105830, TcYC6_0105840, TcYC6_0105850, TcYC6_0105860, TcYC6_0105870, TcYC6_0105880, TcYC6_0105890, TcYC6_0105900, TcYC6_0105910, TcYC6_0105920, TcYC6_0105930, TcYC6_0105940, TcYC6_0105950, TcYC6_0105960, TcYC6_0105970, TcYC6_0105980, TcYC6_0105990	Tc_MARK_1595, Tc_MARK_2222, Tc_MARK_8326, Tc_MARK_8779, Tc_MARK_9037, Tc_MARK_9183, Tc_MARK_9216, Tc_MARK_9260, Tc_MARK_9576	TevSTIB805.8.1840	DQ04_01061140, DQ04_05541050, DQ04_09291030, DQ04_11761010, DQ04_19671000	jg1921.t1, jg1922.t1, jg1923.t1, jg1924.t1, jg1925.t1, jg1926.t1, jg1927.t1, jg1928.t1, jg1929.t1, jg1930.t1, jg1931.t1, jg8068.t1	TRSC58_05478, TRSC58_06296, TRSC58_06786	Tth.197.1000, Tth.197.1010, Tth.197.1020, Tth.197.1030, Tth.26.2180, Tth.37.1240
OG0000044	Yes	No	No	Domain Peptidase C2, calpain, catalytic domain	proteolysis	Calpain family cysteine protease	Baya_102_0010, Baya_102_0020, Baya_102_0030, Baya_102_0040, Baya_179_0010, Baya_355_0010	BSAL_46550	CFAC1_230047000, CFAC1_230047300, CFAC1_230047500	EMOLV88_270009400, EMOLV88_270009500, EMOLV88_270009600, EMOLV88_270009700, EMOLV88_270009800, EMOLV88_270009900, EMOLV88_270010000	LAEL147_000459100, LAEL147_000459200, LAEL147_000459300, LAEL147_000459400, LAEL147_000459500, LAEL147_000459600, LAEL147_000459700	LAMA_000533600, LAMA_000533700_pseudogene, LAMA_000533800, LAMA_000533900_pseudogene	LARLEM1108_270009900, LARLEM1108_270010000, LARLEM1108_270010100, LARLEM1108_270010200, LARLEM1108_270010300	LBRM2903_270011200, LBRM2903_270011300, LBRM2903_270011500, LBRM2903_270011600, LBRM2903_270028400	LbrM.27.2.002140_pseudogene, LbrM.27.2.208380_pseudogene, LbrM.27.2.208390_pseudogene, LbrM.27.2.208400_pseudogene, LbrM.27.2.208410_pseudogene	LdBPK_270500.1, LdBPK_270510.1, LdBPK_272520.1	LdCL_270009800, LdCL_270009900, LdCL_270010000	LdBPK.27.2.002520_pseudogene, LdLV9.27.2.206250_pseudogene, LdLV9.27.2.206260_pseudogene	LENLEM3045_270010500, LENLEM3045_270010600, LENLEM3045_270010700, LENLEM3045_270010800	LGELEM452_270010100, LGELEM452_270010200, LGELEM452_270010300, LGELEM452_270010400, LGELEM452_270010500	LINF_270010000, LINF_270010100, LINF_270010200, LINF_270010300, LINF_270011100	LmjF.27.0490, LmjF.27.0500, LmjF.27.0510	LMJLV39_270009900, LMJLV39_270010100, LMJLV39_270010300, LMJLV39_270010500	LMJSD75_270009900, LMJSD75_270010000, LMJSD75_270010200, LMJSD75_270010300, LMJSD75_270010400	LmxM.27.0490, LmxM.27.0500, LmxM.27.0510	LPAL13_270011300, LPAL13_270011400, LPAL13_270011500, LPAL13_270011600, LPAL13_270011700, LPAL13_270011800	LPMP_270480, LPMP_270490, LPMP_270500	LpyrH10_35_0190, LpyrH10_35_0200, LpyrH10_35_0210, LpyrH10_35_0220	Lsey_0065_0010, Lsey_0351_0010, Lsey_0351_0020, Lsey_0444_0010, Lsey_0444_0020, Lsey_1010_0010	LMARLEM2494_270009700, LMARLEM2494_270009800, LMARLEM2494_270009900, LMARLEM2494_270010000	LtaP27.0490, LtaP27.0500, LtaP27.0510, LtaP27.0520	LTRL590_270009900, LTRL590_270010000, LTRL590_270010100, LTRL590_270010200, LTRL590_270010300	LTULEM423_270009800, LTULEM423_270009900, LTULEM423_270010000, LTULEM423_270010100	PCON_0004700, PCON_0004710, PCON_0004720, PCON_0081220, PCON_0082300, PCON_0082340	CCW61010.1, CCW61011.1	Tb427_110015600_pseudogene, Tb427_110015700, Tb427_110015800, Tb427_110015900	Tb11.v5.0432, Tb11.v5.0702, Tb11.v5.1011, Tb11.v5.1038, Tb927.11.1090, Tb927.11.1110, Tb927.11.1130	Tbg972.11.1170, Tbg972.11.1180, Tbg972.11.1190, Tbg972.11.1200, Tbg972.11.1210	TcIL3000.A.H_000871800, TcIL3000.A.H_000872300, TcIL3000.A.H_000872400, TcIL3000.A.H_000872500, TcIL3000.A.H_000873000, TcIL3000.A.H_000873100, TcIL3000.A.H_000873200	TcBrA4_0056750, TcBrA4_0056880, TcBrA4_0056890, TcBrA4_0056900, TcBrA4_0056910, TcBrA4_0056920, TcBrA4_0080730, TcBrA4_0080750, TcBrA4_0080760	BCY84_03152, BCY84_03153, BCY84_05819, BCY84_05820, BCY84_06259, BCY84_06260, BCY84_06555	TCSYLVIO_005441, TCSYLVIO_005446, TCSYLVIO_007371, TCSYLVIO_007374, TCSYLVIO_007675, TCSYLVIO_007676	TcYC6_0074550, TcYC6_0074560, TcYC6_0074570, TcYC6_0074580	Tc_MARK_4097, Tc_MARK_4098, Tc_MARK_4099, Tc_MARK_4100, Tc_MARK_6347, Tc_MARK_6349, Tc_MARK_6459, Tc_MARK_6778, Tc_MARK_6992	TevSTIB805.11_01.1100, TevSTIB805.11_01.1110, TevSTIB805.11_01.1120, TevSTIB805.11_01.1130	DQ04_04401010, DQ04_12261000, DQ04_12331000	jg3182.t1, jg3182.t3, jg3182.t4, jg3184.t1, jg3185.t1, jg3186.t1, jg3275.t1, jg3276.t1, jg3277.t1	TRSC58_07069	Tth.146.1000, Tth.146.1010, Tth.5.2260, Tth.5.2290, Tth.5.2300
OG0000036	Yes	No	No	Family IGP family C-type lectin domain	NA	IGP family C-type lectin domain	Baya_018_0080																											PCON_0032780		Tb427_020023000, Tb427_020024100_pseudogene, Tb427_020027600, Tb427_020027700, Tb427_020027800, Tb427_020027900, Tb427_020028000, Tb427_020028100, Tb427_020028200, Tb427_020028300, Tb427_020028400, Tb427_020028500, Tb427_060007700, Tb427_090016500, Tb427_090016600, Tb427_090016700, Tb427_090016800, Tb427_090017100, Tb427_090017200, Tb427_090017300	Tb927.2.4760, Tb927.2.4920, Tb927.2.5290, Tb927.2.5300, Tb927.2.5310, Tb927.2.5320, Tb927.2.5330, Tb927.2.5340, Tb927.2.5350, Tb927.2.5360, Tb927.6.370, Tb927.6.380	Tbg.972.2.2790, Tbg.972.2.2800, Tbg.972.2.2940, Tbg.972.2.3330, Tbg.972.2.3350, Tbg.972.2.3370, Tbg.972.2.3390, Tbg.972.2.3410, Tbg.972.2.3430, Tbg.972.2.3450, Tbg.972.2.3470, Tbg.972.2.3490, Tbg.972.2.3500, Tbg.972.2.3520, Tbg.972.2.3540, Tbg.972.2.3550, Tbg.972.2.3570, Tbg.972.2.3580, Tbg.972.2.3600, Tbg.972.2.3620, Tbg.972.2.3640, Tbg.972.2.3660, Tbg.972.2.3680, Tbg.972.2.3700, Tbg.972.2.3720,…	TcIL3000.A.H_000006800, TcIL3000.A.H_000021000, TcIL3000.A.H_000021100, TcIL3000.A.H_000044400_pseudogene, TcIL3000.A.H_000044500_pseudogene, TcIL3000.A.H_000084900, TcIL3000.A.H_000085000, TcIL3000.A.H_000085100, TcIL3000.A.H_000085800, TcIL3000.A.H_000117100, TcIL3000.A.H_000122900_pseudogene, TcIL3000.A.H_000124000, TcIL3000.A.H_000124100, TcIL3000.A.H_000124200, TcIL3000.A.H_000124300, TcIL30…	TcBrA4_0041390, TcBrA4_0041400, TcBrA4_0045950, TcBrA4_0046100, TcBrA4_0046910, TcBrA4_0051900, TcBrA4_0055610, TcBrA4_0065440, TcBrA4_0071300, TcBrA4_0071340, TcBrA4_0074050, TcBrA4_0074080, TcBrA4_0074100, TcBrA4_0074110, TcBrA4_0074390, TcBrA4_0074410, TcBrA4_0074440, TcBrA4_0074480, TcBrA4_0115030	BCY84_03362, BCY84_03637, BCY84_04444, BCY84_05567, BCY84_05568, BCY84_09292, BCY84_10243, BCY84_11398, BCY84_11404, BCY84_11409, BCY84_11506, BCY84_13633, BCY84_13678, BCY84_13679, BCY84_13680, BCY84_13685, BCY84_13708, BCY84_13709, BCY84_16679, BCY84_16699, BCY84_17666, BCY84_17667, BCY84_17669, BCY84_17670, BCY84_17671	TCSYLVIO_000110, TCSYLVIO_000832, TCSYLVIO_001176, TCSYLVIO_003401, TCSYLVIO_006820, TCSYLVIO_009829	TcYC6_0001080, TcYC6_0010000, TcYC6_0023460, TcYC6_0023680, TcYC6_0023770, TcYC6_0023800, TcYC6_0023820, TcYC6_0023860, TcYC6_0102360, TcYC6_0102400, TcYC6_0102430, TcYC6_0102500, TcYC6_0102790, TcYC6_0102830, TcYC6_0102870, TcYC6_0102880, TcYC6_0103010, TcYC6_0103380, TcYC6_0103430, TcYC6_0103480, TcYC6_0103530, TcYC6_0103580	Tc_MARK_1489, Tc_MARK_2684, Tc_MARK_3943, Tc_MARK_6795, Tc_MARK_6895, Tc_MARK_6900, Tc_MARK_6944, Tc_MARK_6967, Tc_MARK_7007, Tc_MARK_7110, Tc_MARK_7336, Tc_MARK_7343, Tc_MARK_7385, Tc_MARK_7536, Tc_MARK_7604, Tc_MARK_8029, Tc_MARK_8465	TevSTIB805.2.2550, TevSTIB805.2.2660, TevSTIB805.2.2990, TevSTIB805.2.3000, TevSTIB805.2.3010, TevSTIB805.2.3020, TevSTIB805.2.3030, TevSTIB805.2.3040, TevSTIB805.2.3050, TevSTIB805.2.3060, TevSTIB805.6.370, TevSTIB805.6.380, TevSTIB805.9.2100	DQ04_13721000, DQ04_13721010	jg8884.t1, jg8886.t1, jg8888.t1, jg8889.t1, jg8890.t1, jg8891.t1	TRSC58_06524, TRSC58_06988, TRSC58_07029, TRSC58_07086, TRSC58_07188	Tth.16.1010, Tth.24.1400, Tth.24.1410, Tth.24.1420, Tth.30.1010, Tth.30.1020, Tth.40.1370, Tth.40.1390, Tth.40.1400, Tth.40.1410, Tth.40.1420, Tth.40.1430, Tth.40.1440, Tth.40.1450, Tth.40.1460
OG0000085	Yes	No	No	NA	NA	NA	Baya_203_0060, Baya_203_0070, Baya_203_0080, Baya_203_0100	BSAL_68955	CFAC1_070013000, CFAC1_080018800, CFAC1_080018900, CFAC1_290032800	EMOLV88_000042200, EMOLV88_070014000, EMOLV88_070014100, EMOLV88_070014200, EMOLV88_070014300	LAEL147_000096900, LAEL147_000097000, LAEL147_000097100, LAEL147_000707300	LAMA_000733800	LARLEM1108_000006800, LARLEM1108_070015000, LARLEM1108_340010100	LBRM2903_070017000, LBRM2903_070017200, LBRM2903_070017300, LBRM2903_070017400, LBRM2903_070017600, LBRM2903_200010200	LbrM.07.2.000910, LbrM.07.2.000920_pseudogene, LbrM.07.2.202250_pseudogene, LbrM.07.2.202260_pseudogene	LdBPK_070950.1, LdBPK_070970.1, LdBPK_070980.1, LdBPK_070990.1, LdBPK_340480.1	LdCL_070014400, LdCL_070014500, LdCL_070014600, LdCL_340009900	LdBPK.07.2.000970_pseudogene, LdBPK.07.2.000980, LdBPK.34.2.000480_pseudogene, LdLV9.07.2.201890_pseudogene, LdLV9.34.2.208590_pseudogene	LENLEM3045_070014800, LENLEM3045_070014900, LENLEM3045_340009900	LGELEM452_070015000, LGELEM452_070015200, LGELEM452_070015300, LGELEM452_070015400, LGELEM452_070015500, LGELEM452_340009900	LINF_070014400, LINF_070014500, LINF_070014600, LINF_340009800	LmjF.07.0820, LmjF.07.0830, LmjF.07.0840, LmjF.34.0460	LMJLV39_070015100, LMJLV39_070015200, LMJLV39_070015300, LMJLV39_070015400, LMJLV39_340010000	LMJSD75_070015200, LMJSD75_070015400, LMJSD75_070015500, LMJSD75_070015600, LMJSD75_070015700, LMJSD75_340010000	LmxM.07.0830, LmxM.07.0831, LmxM.07.0840, LmxM.33.0460	LPAL13_000007400, LPAL13_000017900, LPAL13_000038100, LPAL13_000039800, LPAL13_070014200, LPAL13_200008400, LPAL13_200008500	LPMP_070900, LPMP_200470	LpyrH10_05_0690, LpyrH10_30_0390	Lsey_0069_0120, Lsey_0418_0020	LMARLEM2494_070014400, LMARLEM2494_070014500, LMARLEM2494_070014600, LMARLEM2494_340010100	LtaP07.0870, LtaP07.0880, LtaP07.0890, LtaP07.0900, LtaP34.0500, LtaP34.0750, LtaPcontig102-1, LtaPcontig353-1	LTRL590_070015300, LTRL590_070015400, LTRL590_070015500, LTRL590_070015600, LTRL590_070015700, LTRL590_070015900, LTRL590_340009800	LTULEM423_070015800, LTULEM423_070015900, LTULEM423_070016000, LTULEM423_070016100, LTULEM423_070016200, LTULEM423_070016300, LTULEM423_340010000	PCON_0041300		Tb427_080009600, Tb427_080009800	Tb927.8.940, Tb927.8.960	Tbg972.8.540	TcIL3000.A.H_000566600_pseudogene	TcBrA4_0001410	BCY84_12604	TCSYLVIO_009728	TcYC6_0100390	Tc_MARK_8233	TevSTIB805.8.840, TevSTIB805.8.860	DQ04_05591010	jg8190.t1		Tth.27.1860
OG0000038	Yes	No	No	Domain AMP-dependent synthetase/ligase	NA	AMP-binding enzyme	Baya_088_0200, Baya_088_0210, Baya_157_0170, Baya_254_0010, Baya_254_0020	BSAL_50000, BSAL_53305, BSAL_86020	CFAC1_050010100, CFAC1_050010200, CFAC1_050010500, CFAC1_050010600, CFAC1_050010700, CFAC1_050010800, CFAC1_050010900, CFAC1_050011200, CFAC1_060008000	EMOLV88_010009200, EMOLV88_010009300, EMOLV88_010009500, EMOLV88_010009600, EMOLV88_010009700, EMOLV88_030006900	LAEL147_000023600, LAEL147_000023800, LAEL147_000023900, LAEL147_000024000, LAEL147_000038100	LAMA_000030200, LAMA_000030400_pseudogene, LAMA_000032500, LAMA_000042700	LARLEM1108_010009800, LARLEM1108_010010000, LARLEM1108_010010100, LARLEM1108_010010300, LARLEM1108_030007200	LBRM2903_010010200, LBRM2903_010010300, LBRM2903_010010500, LBRM2903_010010600, LBRM2903_010010700, LBRM2903_030007300	LbrM.01.2.000540_pseudogene, LbrM.01.2.201160_pseudogene, LbrM.01.2.201170_pseudogene, LbrM.01.2.201180_pseudogene, LbrM.03.2.201530	LdBPK_010490.1, LdBPK_010510.1, LdBPK_010520.1, LdBPK_010540.1, LdBPK_030220.1	LdCL_010009900, LdCL_010010100, LdCL_010010200, LdCL_010010400, LdCL_030007200	LdBPK.01.2.000490_pseudogene, LdBPK.01.2.000520_pseudogene, LdBPK.03.2.000220_pseudogene, LdLV9.01.2.201030_pseudogene, LdLV9.01.2.201040_pseudogene	LENLEM3045_010009900, LENLEM3045_010010100, LENLEM3045_010010200, LENLEM3045_010010400, LENLEM3045_030007300	LGELEM452_010009900, LGELEM452_010010100, LGELEM452_010010200, LGELEM452_010010300, LGELEM452_030007200	LINF_010009800, LINF_010010000, LINF_010010100, LINF_010010300, LINF_030007100	LmjF.01.0470, LmjF.01.0490, LmjF.01.0500, LmjF.01.0520, LmjF.03.0230	LMJLV39_010010000, LMJLV39_010010200, LMJLV39_010010300, LMJLV39_010010500, LMJLV39_030007300	LMJSD75_010010000, LMJSD75_010010200, LMJSD75_010010300, LMJSD75_010010500, LMJSD75_030007300	LmxM.01.0470, LmxM.01.0490, LmxM.01.0500, LmxM.01.0520, LmxM.03.0230	LPAL13_010009400, LPAL13_010010000, LPAL13_010010100, LPAL13_030007000	LPMP_010480, LPMP_010510, LPMP_010520, LPMP_030220	LpyrH10_01_9240, LpyrH10_33_0370, LpyrH10_33_0420, LpyrH10_33_0430, LpyrH10_33_0440, LpyrH10_33_0450, LpyrH10_34_0260	Lsey_0146_0160, Lsey_0188_0050, Lsey_0552_0010, Lsey_0600_0010	LMARLEM2494_010010000, LMARLEM2494_010010200, LMARLEM2494_010010400, LMARLEM2494_010010500, LMARLEM2494_030007100	LtaP01.0480, LtaP01.0500, LtaP01.0510, LtaP03.0220	LTRL590_010009700, LTRL590_010009900, LTRL590_010010100, LTRL590_010010200, LTRL590_010010500, LTRL590_030007100	LTULEM423_010010200, LTULEM423_010010400, LTULEM423_010010500, LTULEM423_030007200	PCON_0059270, PCON_0059280, PCON_0059290, PCON_0059300, PCON_0064480	CCW64188.1, CCW64191.1, CCW64193.1	Tb427_090024500, Tb427_090024600, Tb427_090024700, Tb427_090024800, Tb427_100037500	Tb11.v5.0561, Tb11.v5.0825, Tb927.10.3260, Tb927.9.4190, Tb927.9.4200, Tb927.9.4210, Tb927.9.4230	Tbg972.10.4110, Tbg972.9.2190, Tbg972.9.2200, Tbg972.9.2210, Tbg972.9.2220	TcIL3000.A.H_000655900, TcIL3000.A.H_000656000, TcIL3000.A.H_000656100_pseudogene, TcIL3000.A.H_000743100	TcBrA4_0095350, TcBrA4_0095360, TcBrA4_0095370, TcBrA4_0095380, TcBrA4_0131370	BCY84_00483, BCY84_00584, BCY84_01964, BCY84_01965, BCY84_01966, BCY84_01967, BCY84_11989, BCY84_11991, BCY84_11992, BCY84_11993	TCSYLVIO_003436, TCSYLVIO_003437, TCSYLVIO_003438, TCSYLVIO_004512	TcYC6_0004020, TcYC6_0084380, TcYC6_0084390, TcYC6_0084400, TcYC6_0084410	Tc_MARK_2147, Tc_MARK_2148, Tc_MARK_2149, Tc_MARK_3307	TevSTIB805.10.3510, TevSTIB805.9.3060, TevSTIB805.9.3070, TevSTIB805.9.3080, TevSTIB805.9.3090	DQ04_03031080, DQ04_10861000, DQ04_10861010, DQ04_14411000, DQ04_16301010	jg4311.t1, jg4313.t1, jg4314.t1, jg4315.t1, jg4316.t1, jg7218.t1	TRSC58_00504, TRSC58_01059, TRSC58_03581, TRSC58_05627, TRSC58_05872, TRSC58_07121	Tth.1.1910, Tth.6.2030, Tth.6.2040, Tth.6.2050, Tth.6.2060, Tth.6.2070
OG0000106	Yes	No	No	Domain Kinesin motor domain	microtubule-based movement	Kinesin motor domain	Baya_005_0390, Baya_005_0400	BSAL_65435	CFAC1_170013600, CFAC1_170013700, CFAC1_170013900	EMOLV88_190011700, EMOLV88_190011800, EMOLV88_190011900, EMOLV88_190012000	LAEL147_000282000, LAEL147_000282100, LAEL147_000282200, LAEL147_000282300	LAMA_000024000, LAMA_000296100, LAMA_000296300, LAMA_000296400, LAMA_000296500	LARLEM1108_190011100, LARLEM1108_190011200, LARLEM1108_190011300	LBRM2903_190015700, LBRM2903_190015800, LBRM2903_190015900, LBRM2903_190016000, LBRM2903_190017600	LbrM.19.2.205440_pseudogene, LbrM.19.2.205450_pseudogene, LbrM.19.2.205460_pseudogene	LdBPK_190680.1, LdBPK_190690.1, LdBPK_190700.1	LdCL_190011800, LdCL_190011900, LdCL_190012000	LdBPK.19.2.000680_pseudogene, LdBPK.19.2.000690_pseudogene, LdBPK.19.2.000700	LENLEM3045_190012100, LENLEM3045_190012300, LENLEM3045_190012400	LGELEM452_190011500, LGELEM452_190011600, LGELEM452_190011700	LINF_190011700, LINF_190011800, LINF_190011900	LmjF.19.0680, LmjF.19.0690, LmjF.19.0700	LMJLV39_190012400, LMJLV39_190012500, LMJLV39_190012600	LMJSD75_190012000, LMJSD75_190012100, LMJSD75_190012200, LMJSD75_190012300	LmxM.19.0680, LmxM.19.0690, LmxM.19.0700	LPAL13_190015300, LPAL13_190015500, LPAL13_190015700	LPMP_190650, LPMP_190660, LPMP_190670	LpyrH10_04_0690, LpyrH10_04_0700, LpyrH10_04_0720	Lsey_0011_0450, Lsey_0422_0010, Lsey_0422_0030, Lsey_0558_0010	LMARLEM2494_190012000, LMARLEM2494_190012100, LMARLEM2494_190012200	LtaP19.0380, LtaP19.0650, LtaP19.0660, LtaP19.0670, LtaPcontig162-1	LTRL590_190011600, LTRL590_190011700, LTRL590_190011800	LTULEM423_190011500, LTULEM423_190011600, LTULEM423_190011700	PCON_0053150, PCON_0053160	CCW60785.1, CCW60786.1	Tb427_100162500, Tb427_100162600	Tb11.v5.0434, Tb11.v5.0787, Tb11.v5.0849, Tb927.10.15390, Tb927.10.15400	Tbg972.10.18790, Tbg972.10.18810	TcIL3000.A.H_000856600_pseudogene, TcIL3000.A.H_000856700	TcBrA4_0086170, TcBrA4_0086180	BCY84_18552, BCY84_18553	TCSYLVIO_006027, TCSYLVIO_006028	TcYC6_0113790, TcYC6_0113800	Tc_MARK_4734, Tc_MARK_4735	TevSTIB805.10.16200, TevSTIB805.10.16220	DQ04_01791000, DQ04_06331000	jg7951.t1, jg7952.t1	TRSC58_05492	Tth.3.2170, Tth.3.2180, Tth.3.2190
OG0000131	Yes	No	No	NA	NA	NA	Baya_366_0010, Baya_366_0020, Baya_397_0010		CFAC1_290036000, CFAC1_290054700	EMOLV88_000032100, EMOLV88_340011900, EMOLV88_340012000, EMOLV88_340012100, EMOLV88_340012200	LAEL147_000710300, LAEL147_000710400, LAEL147_000710500, LAEL147_000710600, LAEL147_000727900		LARLEM1108_000012500, LARLEM1108_000012600, LARLEM1108_000014800, LARLEM1108_340013200, LARLEM1108_340025700	LBRM2903_200013100, LBRM2903_200013300	LbrM.20.2.000610, LbrM.20.2.000620_pseudogene	LdBPK_340700.1, LdBPK_340710.1, LdBPK_340720.1, LdBPK_342360.1	LdCL_340012650, LdCL_340012700	LdBPK.34.2.002360_pseudogene, LdLV9.34.2.208670_pseudogene, LdLV9.34.2.208680_pseudogene	LENLEM3045_340012300, LENLEM3045_340012400, LENLEM3045_340012500	LGELEM452_000014900, LGELEM452_340012400, LGELEM452_340024800		LmjF.34.0680, LmjF.34.0690		LMJSD75_340013000, LMJSD75_340013100, LMJSD75_340013200, LMJSD75_340013300	LmxM.33.0680, LmxM.33.0690	LPAL13_200011300, LPAL13_200011400, LPAL13_200011500	LPMP_200700, LPMP_200710	LpyrH10_05_0980, LpyrH10_05_0990, LpyrH10_05_1000, LpyrH10_05_1010	Lsey_0005_0720, Lsey_0270_0080, Lsey_0658_0010, Lsey_1136_0010	LMARLEM2494_340012700, LMARLEM2494_340012800, LMARLEM2494_340012900, LMARLEM2494_340029000	LtaP34.0740, LtaP34.0760, LtaP34.0770	LTRL590_340012500, LTRL590_340012600, LTRL590_340012700, LTRL590_340030000	LTULEM423_000016800, LTULEM423_000016900	PCON_0008010, PCON_0009580, PCON_0081630	CCW60531.1	Tb427_040040200	Tb927.4.3740	Tbg972.4.3690	TcIL3000.A.H_000385200_pseudogene	TcBrA4_0041320, TcBrA4_0047020, TcBrA4_0047080, TcBrA4_0047090, TcBrA4_0047150, TcBrA4_0121330, TcBrA4_0121730	BCY84_05817, BCY84_10097	TCSYLVIO_003982, TCSYLVIO_005886	TcYC6_0009180, TcYC6_0087230	Tc_MARK_2676	TevSTIB805.4.3830	DQ04_02221120, DQ04_05211020	jg147.t1, jg1492.t1		Tth.1.3530, Tth.1.3550, Tth.12.1750
OG0000229	Yes	No	No	NA	NA	Phage tail repeat like	Baya_162_0160		CFAC1_240020600	EMOLV88_220017200, EMOLV88_220017300	LAEL147_000346200, LAEL147_000346300		LARLEM1108_220015900, LARLEM1108_220016000	LBRM2903_220017900, LBRM2903_220018000, LBRM2903_220018100, LBRM2903_220018200, LBRM2903_220018300, LBRM2903_220018400	LbrM.22.2.001205_pseudogene	LdBPK_221150.1, LdBPK_221160.1	LdCL_220018800	LdBPK.22.2.001150, LdBPK.22.2.001160_pseudogene	LENLEM3045_220017700, LENLEM3045_220017800	LGELEM452_000018100, LGELEM452_220016700	LINF_220019300	LmjF.22.1320	LMJLV39_220018700, LMJLV39_220018800	LMJSD75_220018900, LMJSD75_220019000, LMJSD75_220019100, LMJSD75_220019200, LMJSD75_220019300, LMJSD75_220019400	LmxM.22.1320	LPAL13_220015400, LPAL13_220015500, LPAL13_220015600	LPMP_221200	LpyrH10_01_1310	Lsey_0479_0010	LMARLEM2494_220017800, LMARLEM2494_220017900	LtaP22.1270, LtaP22.1290	LTRL590_220017300, LTRL590_220017400	LTULEM423_220017000, LTULEM423_220017100	PCON_0081370	CCW61976.1	Tb427_070038600	Tb927.7.3330	Tbg972.7.3660	TcIL3000.A.H_000272700, TcIL3000.A.H_000517900, TcIL3000.A.H_000518000	TcBrA4_0092040, TcBrA4_0094290, TcBrA4_0094300, TcBrA4_0094440	BCY84_06988, BCY84_17321	TCSYLVIO_001773, TCSYLVIO_001795	TcYC6_0093840	Tc_MARK_161, Tc_MARK_196	TevSTIB805.7.3500	DQ04_09781000, DQ04_09781020, DQ04_26941000	jg3233.t1, jg3234.t1, jg3234.t2, jg3234.t3		Tth.19.2380, Tth.19.2390, Tth.19.2400, Tth.19.2410
OG0000221	Yes	No	No	Repeat WD40 repeat	protein binding	WD domain, G-beta repeat	Baya_225_0020	BSAL_00025, BSAL_24330, BSAL_35015, BSAL_40260, BSAL_40270	CFAC1_130020300, CFAC1_130020400	EMOLV88_210018900, EMOLV88_210019000, EMOLV88_210019100	LAEL147_000326500, LAEL147_000326600	LAMA_000410300, LAMA_000410400	LARLEM1108_210019600, LARLEM1108_210019700	LBRM2903_210019700, LBRM2903_210019800, LBRM2903_210019900	LbrM.21.2.001430_pseudogene, LbrM.21.2.001440	LdBPK_211470.1, LdBPK_211480.1	LdCL_210020200, LdCL_210020300	LdBPK.21.2.001470, LdBPK.21.2.001480	LENLEM3045_210019600, LENLEM3045_210019700	LGELEM452_210019700, LGELEM452_210019800	LINF_210020400, LINF_210020500	LmjF.21.1230, LmjF.21.1240	LMJLV39_210020400, LMJLV39_210020500	LMJSD75_210020600, LMJSD75_210020700	LmxM.21.1230, LmxM.21.1240	LPAL13_210018900	LPMP_211430, LPMP_211440	LpyrH10_14_1560, LpyrH10_14_1570	Lsey_0319_0080, Lsey_0319_0090	LMARLEM2494_210020200, LMARLEM2494_210020300	LtaP21.1410, LtaP21.1420	LTRL590_210020200, LTRL590_210020300	LTULEM423_210020000, LTULEM423_210020100	PCON_0043690, PCON_0043700, PCON_0068700	CCW62956.1	Tb427_100011600	Tb11.v5.0753, Tb927.10.840	Tbg972.10.910	TcIL3000.A.H_000718800, TcIL3000.A.H_000718900	TcBrA4_0045710, TcBrA4_0045720, TcBrA4_0132490	BCY84_11525, BCY84_19758	TCSYLVIO_009253	TcYC6_0021580	Tc_MARK_5151	TevSTIB805.10.930	DQ04_08131000, DQ04_08131010	jg1602.t1	TRSC58_02173	Tth.12.3130
OG0000128	Yes	No	No	Domain Phosphatidic acid phosphatase type 2/haloperoxidase	NA	PAP2 superfamily	Baya_173_0130, Baya_173_0140		CFAC1_140010800, CFAC1_140010900	EMOLV88_180009000, EMOLV88_180009100	LAEL147_000262600, LAEL147_000262700	LAMA_000277200, LAMA_000277300	LARLEM1108_180009500	LBRM2903_000005100, LBRM2903_180009700, LBRM2903_180009800, LBRM2903_180013300, LBRM2903_180013400	LbrM.00.2.200360, LbrM.00.2.200370, LbrM.00.2.200380, LbrM.00.2.200390, LbrM.18.2.205060, LbrM.18.2.205070, LbrM.18.2.205080, LbrM.18.2.205090, LbrM.18.2.205100, LbrM.18.2.205110	LdBPK_180430.1, LdBPK_180440.1	LdCL_180009200, LdCL_180009300	LdBPK.18.2.000430, LdBPK.18.2.000440	LENLEM3045_180009900, LENLEM3045_180010000	LGELEM452_180009400, LGELEM452_180009500	LINF_180009300, LINF_180009400	LmjF.18.0430, LmjF.18.0440	LMJLV39_180009700, LMJLV39_180009800	LMJSD75_180009600, LMJSD75_180009700	LmxM.18.0430, LmxM.18.0440	LPAL13_000018800, LPAL13_000022300, LPAL13_180010000	LPMP_180700, LPMP_180710	LpyrH10_13_0570, LpyrH10_13_0580	Lsey_0411_0050, Lsey_0411_0060	LMARLEM2494_180009600, LMARLEM2494_180009700	LtaP18.0450, LtaP18.0460	LTRL590_180009600, LTRL590_180009700	LTULEM423_180009400, LTULEM423_180009500	PCON_0080440, PCON_0080680		Tb427_080005000, Tb427_100141400, Tb427_100145100, Tb427_100147400	Tb08.27P2.110, Tb927.10.13400, Tb927.10.13700, Tb927.10.13930, Tb927.8.480	Tbg972.10.16180, Tbg972.10.16830, Tbg972.10.17120, Tbg972.8.70	TcIL3000.A.H_000233700, TcIL3000.A.H_000233800, TcIL3000.A.H_000838200_pseudogene, TcIL3000.A.H_000840600_pseudogene, TcIL3000.A.H_000842900	TcBrA4_0084460, TcBrA4_0084470	BCY84_18717, BCY84_18718	TCSYLVIO_006169, TCSYLVIO_006170	TcYC6_0115580, TcYC6_0115590	Tc_MARK_4879, Tc_MARK_4880	TevSTIB805.10.14040, TevSTIB805.10.14400, TevSTIB805.10.14630, TevSTIB805.8.380	DQ04_00191160, DQ04_00191170	jg7772.t1, jg7773.t1	TRSC58_05456	Tth.3.3840, Tth.3.3850
OG0000066	Yes	No	No	Domain Dynein heavy chain, hydrolytic ATP-binding dynein motor region	ATP binding	Hydrolytic ATP binding site of dynein motor region	Baya_011_0160, Baya_056_0100, Baya_061_0110, Baya_061_0120, Baya_198_0050	BSAL_09725, BSAL_09795, BSAL_09875, BSAL_40590, BSAL_43995c, BSAL_52975	CFAC1_110021100, CFAC1_250017300, CFAC1_290018000, CFAC1_300012400	EMOLV88_140016200, EMOLV88_260014400, EMOLV88_280007600, EMOLV88_360014600	LAEL147_000202200, LAEL147_000435900, LAEL147_000487800, LAEL147_000817500	LAMA_000220600, LAMA_000315500, LAMA_000511800, LAMA_000560900	LARLEM1108_140016700, LARLEM1108_260015200, LARLEM1108_280011800, LARLEM1108_360014900	LBRM2903_140016200, LBRM2903_260015400, LBRM2903_280011800, LBRM2903_350016500	LbrM.14.2.204380, LbrM.26.2.001040_pseudogene, LbrM.26.2.208260, LbrM.28.2.208750_pseudogene	LdBPK_141130.1, LdBPK_261000.1, LdBPK_280650.1, LdBPK_361010.1	LdCL_140017000, LdCL_260015600, LdCL_280011100, LdCL_360015200	LdBPK.14.2.001130, LdBPK.26.2.001000_pseudogene, LdBPK.36.2.001010_pseudogene, LdLV9.26.2.206160	LENLEM3045_140016100, LENLEM3045_260014800, LENLEM3045_280011800, LENLEM3045_360015400	LGELEM452_140016800, LGELEM452_260014900, LGELEM452_280012100, LGELEM452_360015000	LINF_140016800, LINF_260015200, LINF_280011200, LINF_360015300	LmjF.14.1060, LmjF.26.1020, LmjF.28.0610, LmjF.36.0950	LMJLV39_140017700, LMJLV39_260015800, LMJLV39_280011700, LMJLV39_360015300	LMJSD75_140017100, LMJSD75_260014200, LMJSD75_280011700, LMJSD75_360015200	LmxM.14.1060, LmxM.26.1020, LmxM.28.0610, LmxM.36.0950	LPAL13_140015600, LPAL13_260014900, LPAL13_280011700, LPAL13_350015500	LPMP_141040, LPMP_261000, LPMP_280620, LPMP_350980	LpyrH10_01_8970, LpyrH10_02_7510, LpyrH10_09_1130, LpyrH10_17_1260	Lsey_0031_0090, Lsey_0097_0080, Lsey_0229_0050, Lsey_0365_0030	LMARLEM2494_140016400, LMARLEM2494_260014200, LMARLEM2494_280012400, LMARLEM2494_360014900	LtaP14.1050, LtaP26.0950, LtaP28.0630, LtaP36.0950	LTRL590_140017400, LTRL590_260015000, LTRL590_280011300, LTRL590_360015700	LTULEM423_140015500, LTULEM423_260015200, LTULEM423_280011900, LTULEM423_360015300	PCON_0006000, PCON_0014850, PCON_0022230	CCW59976.1, CCW62408.1, CCW64140.1	Tb427_070012600, Tb427_100057600, Tb427_110089100	Tb11.v5.0242, Tb927.10.5350, Tb927.11.8160, Tb927.7.920	Tbg972.10.6530, Tbg972.11.9320, Tbg972.7.870	TcIL3000.A.H_000495700, TcIL3000.A.H_000495800, TcIL3000.A.H_000761500_pseudogene, TcIL3000.A.H_000941000_pseudogene	TcBrA4_0004140, TcBrA4_0079340, TcBrA4_0106430	BCY84_13432, BCY84_15731, BCY84_16194	TCSYLVIO_002312, TCSYLVIO_002539, TCSYLVIO_009993	TcYC6_0013400, TcYC6_0056550, TcYC6_0079790	Tc_MARK_1032, Tc_MARK_1033, Tc_MARK_1275, Tc_MARK_8537	TevSTIB805.10.5680, TevSTIB805.11_01.8470, TevSTIB805.7.870	DQ04_02011040, DQ04_02231030, DQ04_04471000	jg2133.t1, jg2742.t1, jg9598.t1	TRSC58_01914, TRSC58_06585, TRSC58_06684	Tth.11.2810, Tth.2.4370, Tth.21.1870
OG0000088	Yes	No	No	Domain Adenosine/AMP deaminase domain	deaminase activity	Adenosine deaminase	Baya_008_0370, Baya_019_0190, Baya_112_0210	BSAL_05535, BSAL_06505, BSAL_43485, BSAL_82310	CFAC1_030009600, CFAC1_190038800, CFAC1_300099300	EMOLV88_040007400, EMOLV88_320029400, EMOLV88_350050100	LAEL147_000048900, LAEL147_000648900, LAEL147_000800300	LAMA_000052800, LAMA_000680300, LAMA_000814400	LARLEM1108_040007600, LARLEM1108_320033100, LARLEM1108_350056300	LBRM2903_040007800, LBRM2903_320035300, LBRM2903_340058000	LbrM.04.2.000320, LbrM.32.2.002780, LbrM.34.2.004760	LdBPK_040270.1, LdBPK_322690.1, LdBPK_354860.1	LdCL_040008200, LdCL_320032700, LdCL_350053600	LdBPK.04.2.000270, LdBPK.32.2.002690, LdBPK.35.2.004860	LENLEM3045_040007800, LENLEM3045_320033700, LENLEM3045_350055900	LGELEM452_040007800, LGELEM452_320033100, LGELEM452_350054800	LINF_040007900, LINF_320032400, LINF_350053600	LmjF.04.0280, LmjF.32.2550, LmjF.35.4800	LMJLV39_040007600, LMJLV39_320032800, LMJLV39_350056100	LMJSD75_040007700, LMJSD75_320033000, LMJSD75_320033100, LMJSD75_350055400	LmxM.04.0280, LmxM.31.2550, LmxM.34.4800	LPAL13_040008300, LPAL13_320033100, LPAL13_340054300	LPMP_040250, LPMP_322690, LPMP_344650	LpyrH10_01_7200, LpyrH10_02_2950, LpyrH10_24_0210	Lsey_0002_0520, Lsey_0010_0010, Lsey_0371_0040	LMARLEM2494_040007700, LMARLEM2494_320033500, LMARLEM2494_350054200	LtaP04.0260, LtaP32.2750, LtaP35.4790	LTRL590_040007600, LTRL590_320033000, LTRL590_350054800	LTULEM423_040007500, LTULEM423_320033400, LTULEM423_350054600	PCON_0016820, PCON_0047590, PCON_0078010	CCW60390.1, CCW64381.1, CCW64563.1	Tb427_090040300, Tb427_090055300, Tb427_110176000	Tb927.11.15750, Tb927.9.7180, Tb927.9.9740	Tbg972.11.17670, Tbg972.9.3860, Tbg972.9.5600	TcIL3000.A.H_000677500_pseudogene, TcIL3000.A.H_000680000_pseudogene, TcIL3000.A.H_001023700_pseudogene	TcBrA4_0054180, TcBrA4_0060150, TcBrA4_0102260	BCY84_14465, BCY84_15519, BCY84_18186	TCSYLVIO_004036, TCSYLVIO_005684, TCSYLVIO_007131	TcYC6_0024740, TcYC6_0051070, TcYC6_0071310	Tc_MARK_3425, Tc_MARK_4309, Tc_MARK_6162	TevSTIB805.11_01.16290, TevSTIB805.9.5180, TevSTIB805.9.6980	DQ04_01271100, DQ04_03811030, DQ04_05711010	jg3694.t1, jg6442.t1, jg9033.t1	TRSC58_04557, TRSC58_05737	Tth.22.1270, Tth.35.2000, Tth.4.1890
OG0000476	Yes	No	No	NA	NA	NA	Baya_030_0100		CFAC1_040012400	EMOLV88_100005300	LAEL147_000136300	LAMA_000161400	LARLEM1108_100010200	LBRM2903_100014400, LBRM2903_100014500	LbrM.10.2.000630	LdBPK_100550.1	LdCL_100012200	LdBPK.10.2.000550	LENLEM3045_100010600	LGELEM452_100010400	LINF_100011700	LmjF.10.0500	LMJLV39_100010900	LMJSD75_100011000	LmxM.10.0500	LPAL13_100010800	LPMP_100460	LpyrH10_22_0750	Lsey_0127_0190	LMARLEM2494_100009800	LtaP10.0910	LTRL590_100005600	LTULEM423_100010400	PCON_0078660	CCW65226.1	Tb427_080040200, Tb427_080040400, Tb427_080040500_pseudogene	Tb927.8.3540	Tbg972.8.3230	TcIL3000.A.H_000596400, TcIL3000.A.H_000596600, TcIL3000.A.H_000596700_pseudogene	TcBrA4_0019860, TcBrA4_0019870	BCY84_21455	TCSYLVIO_007368	TcYC6_0063770	Tc_MARK_9330, Tc_MARK_9331, Tc_MARK_9332, Tc_MARK_9334	TevSTIB805.8.3640	DQ04_02161020	jg8788.t1	TRSC58_05428, TRSC58_06368, TRSC58_07031	Tth.164.1000, Tth.164.1010, Tth.164.1020, Tth.164.1030, Tth.25.1510, Tth.25.1520
OG0000173	Yes	No	No	Repeat WD40 repeat	protein binding	WD domain, G-beta repeat	Baya_021_0350, Baya_021_0360	BSAL_08870	CFAC1_280022400, CFAC1_280022500	EMOLV88_330017200, EMOLV88_330017300	LAEL147_000678400, LAEL147_000678500	LAMA_000707900, LAMA_000708000	LARLEM1108_330018600, LARLEM1108_330018700	LBRM2903_330019400, LBRM2903_330019500	LbrM.33.2.001440, LbrM.33.2.001450	LdBPK_331290.1, LdBPK_331300.1	LdCL_330019100, LdCL_330019200	LdBPK.33.2.001290_pseudogene, LdBPK.33.2.001300	LENLEM3045_330018800, LENLEM3045_330018900	LGELEM452_330019000, LGELEM452_330019100	LINF_330019900, LINF_330020000	LmjF.33.1230, LmjF.33.1240	LMJLV39_330019800, LMJLV39_330019900	LMJSD75_330019500, LMJSD75_330019600	LmxM.32.1230, LmxM.32.1240	LPAL13_330018000, LPAL13_330018100	LPMP_331290, LPMP_331300	LpyrH10_19_0390, LpyrH10_19_0400	Lsey_0200_0080, Lsey_0200_0090	LMARLEM2494_330018000, LMARLEM2494_330018100	LtaP33.1330, LtaP33.1340	LTRL590_330018600, LTRL590_330018700	LTULEM423_330018900, LTULEM423_330019000	PCON_0046510, PCON_0085290	CCW63123.1, CCW63124.1	Tb427_100125800, Tb427_100125900	Tb927.10.11840, Tb927.10.11850	Tbg972.10.14270, Tbg972.10.14280, Tbg972.10.14290	TcIL3000.A.H_000823400, TcIL3000.A.H_000823500	TcBrA4_0002050, TcBrA4_0002060, TcBrA4_0002070, TcBrA4_0002140, TcBrA4_0004610, TcBrA4_0004620, TcBrA4_0004630	BCY84_04193, BCY84_04194, BCY84_04195, BCY84_16244, BCY84_16245	TCSYLVIO_010062	TcYC6_0079190, TcYC6_0079200	Tc_MARK_8601, Tc_MARK_8602	TevSTIB805.10.12400, TevSTIB805.10.12410	DQ04_09521000, DQ04_09521010	jg559.t1, jg560.t1		Tth.8.3750, Tth.8.3760
OG0000710	Yes	No	No	NA	NA	NA	Baya_197_0010, Baya_233_0050, Baya_238_0050, Baya_276_0010		CFAC1_270051300	EMOLV88_310026500	LAEL147_000610100, LAEL147_000610200	LAMA_000644300	LARLEM1108_310030900, LARLEM1108_310031000	LBRM2903_310034300	LbrM.31.2.002500_pseudogene	LdBPK_312290.1	LdCL_310030900		LENLEM3045_000014600, LENLEM3045_000017600	LGELEM452_310029200, LGELEM452_310029300	LINF_310030400	LmjF.31.2220	LMJLV39_310031500	LMJSD75_310031500	LmxM.30.2220	LPAL13_310027500	LPMP_312060	LpyrH10_12_0200	Lsey_0100_0100, Lsey_0100_0110	LMARLEM2494_000007800, LMARLEM2494_000010600	LtaP31.2660	LTRL590_310033600, LTRL590_310033800, LTRL590_310034100	LTULEM423_310029400, LTULEM423_310029500	PCON_0060990		Tb427_080081200	Tb927.8.7540	Tbg972.8.7780, Tbg972.8.7790	TcIL3000.A.H_000215200, TcIL3000.A.H_000635500	TcBrA4_0032460					TevSTIB805.8.7930	DQ04_17531010	jg1910.t1, jg1975.t1		Tth.26.2300
OG0000434	Yes	No	No	Domain C2 domain	NA	C2 domain	Baya_007_0110, Baya_044_0080	BSAL_14140	CFAC1_280048500	EMOLV88_360074600	LAEL147_000856700	LAMA_000350600_pseudogene	LARLEM1108_360053400	LBRM2903_350056400, LBRM2903_350056500	LbrM.35.2.004570	LdBPK_364540.1	LdCL_360052600	LdBPK.36.2.004540	LENLEM3045_360053400	LGELEM452_360053300	LINF_360052600	LmjF.36.4330	LMJLV39_360054500	LMJSD75_360054400	LmxM.36.4330	LPAL13_350052600	LPMP_354440	LpyrH10_06_2090	Lsey_0050_0150	LMARLEM2494_360053000	LtaP36.4470	LTRL590_360054300	LTULEM423_360053700	PCON_0030060, PCON_0030730		Tb427_100103800, Tb427_110124800	Tb11.01.2730, Tb11.v5.0773, Tb927.10.9700	Tbg972.10.11860, Tbg972.11.12270	TcIL3000.A.H_000807600_pseudogene, TcIL3000.A.H_000971900_pseudogene	TcBrA4_0013940, TcBrA4_0026140	BCY84_11198, BCY84_11640	TCSYLVIO_004748, TCSYLVIO_008314	TcYC6_0005650, TcYC6_0123490	Tc_MARK_2269, Tc_MARK_7220	TevSTIB805.10.10280, TevSTIB805.11_01.11290	DQ04_00381050, DQ04_05621010, DQ04_05621020	jg5003.t1, jg5648.t1	TRSC58_04470	Tth.6.3250, Tth.8.1650
OG0000080	Yes	No	No	Domain Cation-transporting P-type ATPase, N-terminal	NA	E1-E2 ATPase	Baya_080_0220	BSAL_03190, BSAL_06025, BSAL_06030, BSAL_39810, BSAL_39815, BSAL_42870, BSAL_46970, BSAL_46975, BSAL_57735, BSAL_57740, BSAL_66915, BSAL_66945, BSAL_93450	CFAC1_140024900, CFAC1_140025000	EMOLV88_180019200, EMOLV88_180019300	LAEL147_000273500, LAEL147_000273600	LAMA_000288000, LAMA_000288100	LARLEM1108_180020200, LARLEM1108_180020300	LBRM2903_000006800, LBRM2903_000009600, LBRM2903_180021700	LbrM.18.2.205310_pseudogene, LbrM.18.2.205320	LdBPK_181490.1, LdBPK_181500.1, LdBPK_181510.1	LdCL_180020300, LdCL_180020400	LdLV9.18.2.204420, LdLV9.18.2.204430	LENLEM3045_180020800	LGELEM452_180019600, LGELEM452_180019700	LINF_180020600, LINF_180020700, LINF_180020800	LmjF.18.1510, LmjF.18.1520	LMJLV39_180020700, LMJLV39_180020800, LMJLV39_180020900	LMJSD75_180021000, LMJSD75_180021100	LmxM.18.1510, LmxM.18.1520	LPAL13_180018000	LPMP_181470	LpyrH10_13_1870, LpyrH10_13_1880		LMARLEM2494_180020500	LtaP18.1480	LTRL590_180020500	LTULEM423_180017800	PCON_0067780	CCW64916.1	Tb427_100132400, Tb427_100132500	Tb927.10.12500, Tb927.10.12510	Tbg972.10.15070	TcIL3000.A.H_000829900, TcIL3000.A.H_000830000_pseudogene, TcIL3000.A.H_000830100_pseudogene	TcBrA4_0055250, TcBrA4_0081120, TcBrA4_0081130, TcBrA4_0081160, TcBrA4_0081170, TcBrA4_0081310, TcBrA4_0081320, TcBrA4_0083210, TcBrA4_0083220, TcBrA4_0083240, TcBrA4_0083250, TcBrA4_0083260, TcBrA4_0083270, TcBrA4_0083280, TcBrA4_0083290, TcBrA4_0083300, TcBrA4_0083310, TcBrA4_0083320	BCY84_00614, BCY84_00615, BCY84_18859, BCY84_18860, BCY84_18861, BCY84_18862, BCY84_18863, BCY84_19913	TCSYLVIO_000802, TCSYLVIO_006292, TCSYLVIO_007197, TCSYLVIO_008516, TCSYLVIO_008684	TcYC6_0025450, TcYC6_0116900, TcYC6_0116910, TcYC6_0116920, TcYC6_0116930, TcYC6_0116940, TcYC6_0116950, TcYC6_0116960, TcYC6_0116970, TcYC6_0116980, TcYC6_0116990, TcYC6_0117000, TcYC6_0117010	Tc_MARK_10352, Tc_MARK_4999, Tc_MARK_5000, Tc_MARK_5924, Tc_MARK_7416	TevSTIB805.10.13100, TevSTIB805.10.13110	DQ04_00531070, DQ04_00591220, DQ04_16011000, DQ04_16011010, DQ04_16011020, DQ04_18601000, DQ04_21131000	jg6521.t1, jg7644.t1, jg7645.t1, jg7646.t1, jg7647.t1	TRSC58_01997, TRSC58_02759, TRSC58_04120, TRSC58_04923, TRSC58_07115	Tth.3.4990, Tth.3.5000, Tth.3.5010, Tth.3.5020, Tth.35.1200
OG0000096	Yes	No	No	Domain Protein kinase domain	protein phosphorylation	Protein kinase domain	Baya_032_0200, Baya_047_0090, Baya_093_0220	BSAL_05185, BSAL_05220, BSAL_07340, BSAL_45660	CFAC1_140020200, CFAC1_180016800, CFAC1_300090200, CFAC1_300090700	EMOLV88_180015300, EMOLV88_200013900, EMOLV88_350043000, EMOLV88_350043500	LAEL147_000268800, LAEL147_000791600, LAEL147_000792100	LAMA_000284100	LARLEM1108_180016100, LARLEM1108_350047800, LARLEM1108_350047900, LARLEM1108_350048400	LBRM2903_180017300, LBRM2903_340049300	LbrM.18.2.001180, LbrM.34.2.003990	LdBPK_181090.1, LdBPK_354010.1, LdBPK_354060.1	LdCL_180016100, LdCL_350045200, LdCL_350045700	LdBPK.18.2.001090_pseudogene, LdLV9.18.2.204380, LdLV9.35.2.209690_pseudogene	LENLEM3045_180016600, LENLEM3045_200015100, LENLEM3045_200015200, LENLEM3045_200015400, LENLEM3045_350048000	LGELEM452_180015600, LGELEM452_350046400	LINF_180016200, LINF_350045100, LINF_350045600	LmjF.18.1080, LmjF.35.3960, LmjF.35.4010	LMJLV39_180016300, LMJLV39_350047400, LMJLV39_350047900	LMJSD75_180016500, LMJSD75_350046700, LMJSD75_350047200, LMJSD75_350047300	LmxM.18.1080, LmxM.34.3960, LmxM.34.4010	LPAL13_180014100, LPAL13_340046100	LPMP_181080, LPMP_343880	LpyrH10_01_6310, LpyrH10_01_6360, LpyrH10_13_1410, LpyrH10_25_0960	Lsey_0013_0140, Lsey_0119_0040	LMARLEM2494_180016400, LMARLEM2494_200014400, LMARLEM2494_350046300	LtaP18.1070, LtaP35.4030, LtaPcontig236-1	LTRL590_180016300, LTRL590_350046200, LTRL590_350046700	LTULEM423_000010100, LTULEM423_350046200, LTULEM423_350046700	PCON_0060650, PCON_0084890	CCW64449.1, CCW64951.1	Tb427_090063100, Tb427_090063500, Tb427_100137300	Tb11.v5.0671, Tb927.10.13010, Tb927.9.11030, Tb927.9.11100	Tbg972.10.15700, Tbg972.9.6520, Tbg972.9.6590	TcIL3000.A.H_000687600, TcIL3000.A.H_000688000, TcIL3000.A.H_000834200	TcBrA4_0061290, TcBrA4_0061330, TcBrA4_0083750	BCY84_14171, BCY84_14175, BCY84_18811	TCSYLVIO_005761, TCSYLVIO_006257	TcYC6_0070180, TcYC6_0070220, TcYC6_0116430	Tc_MARK_4386, Tc_MARK_4952	TevSTIB805.10.13650, TevSTIB805.9.7870, TevSTIB805.9.7920	DQ04_00171210, DQ04_01981020, DQ04_08311010	jg6333.t1, jg6337.t1, jg754.t1, jg7694.t1	TRSC58_00165, TRSC58_02196, TRSC58_06785	Tth.14.2060, Tth.3.4560, Tth.4.2750, Tth.4.2790
OG0000264	Yes	No	No	NA	NA	NA	Baya_204_0040		CFAC1_270024600		LAEL147_000597600	LAMA_000633800	LARLEM1108_310017900	LBRM2903_310021600	LbrM.31.2.001350	LdBPK_311160.1	LdCL_310018300	LdBPK.31.2.001160		LGELEM452_310016900	LINF_310017900	LmjF.31.1150	LMJLV39_310017900	LMJSD75_310017500	LmxM.30.1150	LPAL13_310017400	LPMP_311060	LpyrH10_12_1770	Lsey_0573_0010	LMARLEM2494_310010900	LtaP31.1090	LTRL590_000029200, LTRL590_310018400, LTRL590_310018600	LTULEM423_310016800	PCON_0076580	CCW65591.1	Tb427_080085800	Tb927.8.8010	Tbg972.8.8330	TcIL3000.A.H_000392400_pseudogene	TcBrA4_0033580, TcBrA4_0033630, TcBrA4_0042550, TcBrA4_0050460, TcBrA4_0050470, TcBrA4_0050490, TcBrA4_0052790, TcBrA4_0052800, TcBrA4_0065800, TcBrA4_0065840, TcBrA4_0065870, TcBrA4_0065880, TcBrA4_0069960, TcBrA4_0070040	BCY84_00426, BCY84_00430, BCY84_00434, BCY84_18128, BCY84_18132, BCY84_18133, BCY84_18137, BCY84_18141, BCY84_18144, BCY84_18148, BCY84_21645, BCY84_21650, BCY84_21654, BCY84_21658, BCY84_21663	TCSYLVIO_002942	TcYC6_0106700, TcYC6_0106740, TcYC6_0106770, TcYC6_0106800, TcYC6_0106830	Tc_MARK_10349, Tc_MARK_1498, Tc_MARK_1615, Tc_MARK_1650, Tc_MARK_8831	TevSTIB805.8.8490	DQ04_02731020	jg2032.t1	TRSC58_00594, TRSC58_02342	Tth.41.2010
OG0000690	Yes	No	No	NA	NA	NA	Baya_045_0310, Baya_321_0030	BSAL_81255	CFAC1_270015400	EMOLV88_310011500	LAEL147_000593200	LAMA_000629400	LARLEM1108_310012900	LBRM2903_310015700	LbrM.31.2.000840	LdBPK_310700.1	LdCL_310012700	LdBPK.31.2.000700	LENLEM3045_000031700, LENLEM3045_000035900	LGELEM452_310012400	LINF_310012400	LmjF.31.0670	LMJLV39_310012400	LMJSD75_310012100	LmxM.30.0670	LPAL13_310011800	LPMP_310660	LpyrH10_32_0350	Lsey_0007_0070	LMARLEM2494_310009800	LtaP31.0690	LTRL590_000012700, LTRL590_310012700	LTULEM423_310012100	PCON_0077430	CCW65200.1	Tb427_040044500, Tb427_080087200	Tb927.4.4180, Tb927.8.8160	Tbg972.4.4310, Tbg972.8.8480	TcIL3000.A.H_000390300_pseudogene	TcBrA4_0033790	BCY84_21629	TCSYLVIO_002957	TcYC6_0106990	Tc_MARK_1665	TevSTIB805.4.4360, TevSTIB805.8.8650	DQ04_04221050	jg2052.t1	TRSC58_04668	Tth.41.1780
OG0000864	Yes	No	No	Domain TLDc domain	NA	TLD	Baya_055_0240	BSAL_74960, BSAL_75030	CFAC1_060010500	EMOLV88_030008700	LAEL147_000040100	LAMA_000044600	LARLEM1108_030009400	LBRM2903_030009200	LbrM.03.2.000410	LdBPK_030430.1	LdCL_030009300	LdBPK.03.2.000430	LENLEM3045_030009300	LGELEM452_030009300	LINF_030009200	LmjF.03.0450	LMJLV39_030009700	LMJSD75_030009700	LmxM.03.0450	LPAL13_030008900	LPMP_030400	LpyrH10_34_0590	Lsey_0485_0010	LMARLEM2494_030009200	LtaP03.0410	LTRL590_030009300	LTULEM423_030009500	PCON_0064290, PCON_0064300	CCW64000.1	Tb427_100038800	Tb11.v5.0724, Tb927.10.3390	Tbg972.10.4260	TcIL3000.A.H_000744500, TcIL3000.A.H_000744600	TcBrA4_0131040	BCY84_15343	TCSYLVIO_004499	TcYC6_0111860	Tc_MARK_3293	TevSTIB805.10.3640	DQ04_00041250	jg7195.t1	TRSC58_01878	Tth.1.2110
OG0000839	Yes	No	No	NA	NA	NA	Baya_014_0710	BSAL_03985	CFAC1_090017500	EMOLV88_170014600	LAEL147_000252600, LAEL147_000252700	LAMA_000268600	LARLEM1108_170015600	LBRM2903_170017800, LBRM2903_170017900	LbrM.17.2.001100	LdBPK_171090.1	LdCL_170016900	LdBPK.17.2.001090	LENLEM3045_170016100	LGELEM452_170011800	LINF_170017000	LmjF.17.0990	LMJLV39_170017100	LMJSD75_170016700, LMJSD75_170016800	LmxM.17.0990	LPAL13_170015800, LPAL13_170015900	LPMP_170960	LpyrH10_21_1100	Lsey_0163_0030	LMARLEM2494_170015200	LtaP17.1140	LTRL590_170015100	LTULEM423_170015400	PCON_0046810	CCW65687.1	Tb427_050029600	Tb927.5.2330	Tbg972.5.3300	TcIL3000.A.H_000415000	TcBrA4_0136010	BCY84_16833	TCSYLVIO_008985	TcYC6_0048700	Tc_MARK_7653	TevSTIB805.5.2720	DQ04_01951030, DQ04_01951040	jg8357.t1	TRSC58_06733	Tth.20.1620
OG0000715	Yes	No	No	Repeat Pumilio RNA-binding repeat	RNA binding	Pumilio-family RNA binding repeat	Baya_282_0040	BSAL_15090, BSAL_46430, BSAL_90365c	CFAC1_010009800	EMOLV88_120008800, EMOLV88_120008900	LAEL147_000166400	LAMA_000187600	LARLEM1108_120009400	LBRM2903_120010000	LbrM.12.2.000400	LdBPK_120330.1	LdCL_120008900	LdBPK.12.2.000330	LENLEM3045_120009500	LGELEM452_120009500	LINF_120008900	LmjF.12.0380	LMJLV39_120009200	LMJSD75_120009000	LmxM.12.0380	LPAL13_120008800	LPMP_120390	LpyrH10_23_0980	Lsey_0084_0130	LMARLEM2494_120008900, LMARLEM2494_120009000	LtaP12.0390	LTRL590_120009100	LTULEM423_120009300	PCON_0057060	CCW64162.1	Tb427_060011600	Tb11.v5.0730, Tb927.6.820	Tbg972.6.590	TcIL3000.A.H_000445600_pseudogene	TcBrA4_0067870	BCY84_08685, BCY84_19374	TCSYLVIO_006961	TcYC6_0061050	Tc_MARK_5712	TevSTIB805.6.890	DQ04_10521010	jg5673.t1, jg5673.t2, jg5673.t3	TRSC58_00991	Tth.32.1460
OG0000314	Yes	No	No	Domain TRAM/LAG1/CLN8 homology domain	integral component of membrane	TLC domain	Baya_023_0080, Baya_039_0300	BSAL_24205, BSAL_24215, BSAL_24220	CFAC1_270036700	EMOLV88_310023100	LAEL147_000605000	LAMA_000640000	LARLEM1108_310025200	LBRM2903_310029600	LbrM.31.2.002010	LdBPK_311800.1	LdCL_310025300	LdBPK.31.2.001800	LENLEM3045_000022600	LGELEM452_310024200	LINF_310025200	LmjF.31.1780	LMJLV39_310025800	LMJSD75_310025300	LmxM.30.1780	LPAL13_310023200	LPMP_311690	LpyrH10_12_0910	Lsey_0424_0010	LMARLEM2494_000007200	LtaP31.2250	LTRL590_310027300	LTULEM423_310024200	PCON_0002720, PCON_0002730	CCW65176.1	Tb427_040050900, Tb427_080083400	Tb927.4.4740, Tb927.8.7730	Tbg972.4.4900, Tbg972.8.7980	TcIL3000.A.H_000396200_pseudogene	TcBrA4_0032440, TcBrA4_0032450, TcBrA4_0032870, TcBrA4_0032900, TcBrA4_0033030, TcBrA4_0033040	BCY84_00328, BCY84_10384, BCY84_10389, BCY84_12477, BCY84_12484, BCY84_12493, BCY84_12495	TCSYLVIO_002894	TcYC6_0026610, TcYC6_0026710, TcYC6_0026730, TcYC6_0106060, TcYC6_0106180, TcYC6_0106200	Tc_MARK_1607	TevSTIB805.4.4920, TevSTIB805.8.8120	DQ04_09511000, DQ04_21031000, DQ04_25111000	jg1957.t1, jg1974.t1	TRSC58_01903, TRSC58_05745	Tth.26.1940, Tth.26.2060
OG0000436	Yes	No	No	Domain Ribonuclease H2 subunit B, wHTH domain	NA	Ydr279p protein family (RNase H2 complex component) wHTH domain	Baya_031_0310	BSAL_59235	CFAC1_010014500	EMOLV88_120012600		LAMA_000036100	LARLEM1108_120013100	LBRM2903_120013300	LbrM.12.2.000960		LdCL_120012500, LdCL_120012700, LdCL_120013000, LdCL_120013400, LdCL_120013600, LdCL_120013900, LdCL_120014100, LdCL_120014400, LdCL_120014600, LdCL_120014900, LdCL_120015100, LdCL_120015400, LdCL_120015600, LdCL_120015900, LdCL_120016100, LdCL_120016400, LdCL_120016600, LdCL_120016900, LdCL_120017100, LdCL_120017400, LdCL_120017600, LdCL_120017700, LdCL_120018000		LENLEM3045_120014200		LINF_120013800, LINF_120014100, LINF_120014500	LmjF.12.0880, LmjF.12.0885, LmjF.12.0905, LmjF.12.0995, LmjF.12.1015	LMJLV39_120012700	LMJSD75_120013200	LmxM.12.0905	LPAL13_120012000	LPMP_120730	LpyrH10_23_0510	Lsey_0547_0010	LMARLEM2494_120013000				PCON_0077570		Tb427_010028600	Tb927.1.4220	Tbg972.1.2770	TcIL3000.A.H_000997300_pseudogene	TcBrA4_0068520	BCY84_19420	TCSYLVIO_006925	TcYC6_0060280		TevSTIB805.1.4110	DQ04_03721040	jg2332.t1	TRSC58_02320	Tth.32.1820, Tth.32.1830
OG0000357	Yes	No	No	Family YABBY protein	spermatogenesis	YABBY protein	Baya_020_0550, Baya_020_0570	BS59700, BSAL_14825, BSAL_19650, BSAL_19655, BSAL_43380, BSAL_62005, BSAL_90200, BSAL_90205	CFAC1_280066300	EMOLV88_360089600	LAEL147_000872600	LAMA_000364900	LARLEM1108_360070000	LBRM2903_350072700	LbrM.35.2.006130	LdBPK_366100.1	LdCL_360068400	LdBPK.36.2.006100	LENLEM3045_360069200	LGELEM452_360069300	LINF_360068300	LmjF.36.5845	LMJLV39_360070900	LMJSD75_360070900	LmxM.36.5845	LPAL13_350068300	LPMP_355990	LpyrH10_06_3900	Lsey_0004_0460	LMARLEM2494_360068700	LtaP36.5990	LTRL590_360070400	LTULEM423_360069900	PCON_0029450, PCON_0029470, PCON_0029480	CCW63288.1	Tb427_100096500, Tb427_100096700	Tb927.10.8950, Tb927.10.8970	Tbg972.10.10950, Tbg972.10.10970	TcIL3000.A.H_000798400, TcIL3000.A.H_000798600	TcBrA4_0013260, TcBrA4_0013280, TcBrA4_0013290	BCY84_11272, BCY84_11273, BCY84_11275		TcYC6_0122720, TcYC6_0122740, TcYC6_0122750		TevSTIB805.10.9510, TevSTIB805.10.9530	DQ04_16941000	jg5074.t1, jg5075.t1, jg5077.t1	TRSC58_05581, TRSC58_06152, TRSC58_07007, TRSC58_07160	Tth.34.2390, Tth.34.2410, Tth.34.2420
OG0000177	Yes	No	No	Domain HD domain	NA	HD domain	Baya_002_0750, Baya_019_0170, Baya_087_0240	BSAL_05655, BSAL_09320	CFAC1_190038700, CFAC1_220027000	EMOLV88_060006400, EMOLV88_320029300	LAEL147_000073100, LAEL147_000648800	LAMA_000076400, LAMA_000681000	LARLEM1108_060006400, LARLEM1108_320033000	LBRM2903_060006800, LBRM2903_320035200	LbrM.06.2.000140, LbrM.32.2.002770	LdBPK_060160.1, LdBPK_322680.1	LdCL_060006500, LdCL_320032600	LdBPK.06.2.000160, LdBPK.32.2.002680	LENLEM3045_060006500, LENLEM3045_320033600	LGELEM452_060006500, LGELEM452_320033000	LINF_060006700, LINF_320032300	LmjF.06.0160, LmjF.32.2540	LMJLV39_060006500, LMJLV39_320032700	LMJSD75_060006500, LMJSD75_320032900	LmxM.06.0160, LmxM.31.2540	LPAL13_060006700, LPAL13_320033000	LPMP_060140, LPMP_322680	LpyrH10_02_2940, LpyrH10_03_0250	Lsey_0079_0260, Lsey_0142_0200	LMARLEM2494_060006400, LMARLEM2494_320033400	LtaP06.0130, LtaP32.2740	LTRL590_060006400, LTRL590_320032900	LTULEM423_060006300, LTULEM423_320033300, LTULEM423_320034100	PCON_0007910, PCON_0025910	CCW60392.1, CCW61134.1	Tb427_060034100, Tb427_070053700	Tb11.v5.0163, Tb927.6.2900, Tb927.7.4810	Tbg972.6.2690, Tbg972.7.5490	TcIL3000.A.H_000464700_pseudogene, TcIL3000.A.H_000533000_pseudogene	TcBrA4_0029530, TcBrA4_0080080	BCY84_00972, BCY84_17934	TCSYLVIO_002483, TCSYLVIO_003198, TCSYLVIO_007682	TcYC6_0041680, TcYC6_0096510	Tc_MARK_1193, Tc_MARK_1908	TevSTIB805.6.2990, TevSTIB805.7.5200	DQ04_04361060, DQ04_08771020	jg1240.t1, jg83.t1	TRSC58_01457, TRSC58_02017	Tth.40.1120, Tth.7.3460
OG0000660	Yes	No	No	NA	NA	NA	Baya_143_0150		CFAC1_270068500	EMOLV88_310034800	LAEL147_000619800	LAMA_000653500	LARLEM1108_310041700, LARLEM1108_310041800	LBRM2903_310045800	LbrM.31.2.003550	LdBPK_313240.1	LdCL_310040700	LdBPK.31.2.003240	LENLEM3045_000020200, LENLEM3045_310020100	LGELEM452_310039000, LGELEM452_310039100	LINF_310040100	LmjF.31.3110	LMJLV39_310042300	LMJSD75_310042400	LmxM.30.3110	LPAL13_310038400	LPMP_313000	LpyrH10_29_1460	Lsey_0268_0060	LMARLEM2494_310022600	LtaP31.3600		LTULEM423_310039400	PCON_0066940, PCON_0066950	CCW65722.1	Tb427_040056700, Tb427_080076100	Tb927.4.5340, Tb927.8.6980	Tbg972.4.5500, Tbg972.8.7200	TcIL3000.A.H_000629400	TcBrA4_0031760, TcBrA4_0120740, TcBrA4_0120750	BCY84_09124	TCSYLVIO_002759	TcYC6_0103780	Tc_MARK_1520	TevSTIB805.4.5580, TevSTIB805.8.7310	DQ04_00661060	jg1883.t1	TRSC58_02099	Tth.44.1170
OG0000440	Yes	No	No	NA	NA	NA	Baya_305_0030	BSAL_87475	CFAC1_210044200	EMOLV88_330037200	LAEL147_000701400	LAMA_000728100	LARLEM1108_330039400	LBRM2903_330043100	LbrM.33.2.003450	LdBPK_333330.1	LdCL_330040900	LdBPK.33.2.003330	LENLEM3045_330041600	LGELEM452_330042500	LINF_330041900	LmjF.33.3180	LMJLV39_330045000	LMJSD75_330043800	LmxM.32.3180	LPAL13_330041200	LPMP_333290	LpyrH10_03_5630	Lsey_0124_0110	LMARLEM2494_330040200	LtaP33.3430	LTRL590_330041300	LTULEM423_330042600	PCON_0074920	CCW63703.1	Tb427_020031400	Tb927.2.5970	Tbg.972.2.4190	TcIL3000.A.H_000042000	TcBrA4_0051990, TcBrA4_0052270, TcBrA4_0052330, TcBrA4_0097610, TcBrA4_0101140, TcBrA4_0101910, TcBrA4_0102380, TcBrA4_0102420	BCY84_02891, BCY84_05559, BCY84_07500, BCY84_10229, BCY84_11386, BCY84_11392, BCY84_18198, BCY84_18208, BCY84_18214	TCSYLVIO_000408	TcYC6_0051200, TcYC6_0077040, TcYC6_0077850, TcYC6_0078070, TcYC6_0078080	Tc_MARK_9501, Tc_MARK_9650, Tc_MARK_9651	TevSTIB805.2.3400	DQ04_08911030	jg4716.t1		Tth.23.2560
OG0003614	Yes	No	No	Binding_site IQ motif, EF-hand binding site	protein binding	IQ calmodulin-binding motif	Baya_089_0090		CFAC1_140018600	EMOLV88_180014300	LAEL147_000267600	LAMA_000282900	LARLEM1108_180014900	LBRM2903_180016000	LbrM.18.2.001780_pseudogene	LdBPK_180970.1	LdCL_180014900	LdBPK.18.2.000970	LENLEM3045_180015400	LGELEM452_180014500	LINF_180015000	LmjF.18.0970	LMJLV39_180015200	LMJSD75_180015100	LmxM.18.0970	LPAL13_180012600	LPMP_180970	LpyrH10_13_1290	Lsey_0013_0260	LMARLEM2494_180015300	LtaP18.0960	LTRL590_180015100	LTULEM423_180015100	PCON_0079010, PCON_0079020		Tb427_100138600	Tb927.10.13150	Tbg972.10.15900	TcIL3000.A.H_000835600	TcBrA4_0083880	BCY84_18796	TCSYLVIO_006225	TcYC6_0116170	Tc_MARK_4936	TevSTIB805.10.13790	DQ04_01091090	jg7707.t1	TRSC58_05058	Tth.3.4440
OG0002115	Yes	No	No	NA	NA	NA	Baya_046_0030		CFAC1_300018200	EMOLV88_280012300	LAEL147_000493000	LAMA_000423900	LARLEM1108_280017100	LBRM2903_280017300	LbrM.28.2.001140	LdBPK_281160.1	LdCL_280016200	LdBPK.28.2.001160	LENLEM3045_280017100	LGELEM452_280017400	LINF_280016300	LmjF.28.1070	LMJLV39_280017000	LMJSD75_280016800	LmxM.28.1070	LPAL13_280017300	LPMP_281130	LpyrH10_02_6960	Lsey_0223_0090	LMARLEM2494_280018100	LtaP28.1140	LTRL590_280016500	LTULEM423_280017000	PCON_0022690	CCW62368.1	Tb427_110082600	Tb11.v5.0801, Tb927.11.7590	Tbg972.11.8810	TcIL3000.A.H_000936300	TcBrA4_0088610	BCY84_04357, BCY84_12852	TCSYLVIO_001779	TcYC6_0045080, TcYC6_0045090	Tc_MARK_611	TevSTIB805.11_01.8010	DQ04_00411110	jg2189.t1		Tth.11.2230
OG0006344	Yes	No	No	NA	NA	Fusaric acid resistance protein-like	Baya_016_0540, Baya_054_0170, Baya_070_0300, Baya_110_0250		CFAC1_080007100, CFAC1_190027400, CFAC1_290024000, CFAC1_290024100	EMOLV88_320020100				LBRM2903_260019900					LENLEM3045_320023200									LpyrH10_01_9500, LpyrH10_01_9510, LpyrH10_02_1880	Lsey_0001_0310, Lsey_0033_0190	LMARLEM2494_320022500				PCON_0012960, PCON_0012970	CCW62808.1	Tb427_070008200	Tb927.7.480	Tbg972.7.330	TcIL3000.A.H_000491300_pseudogene	TcBrA4_0105890	BCY84_06462, BCY84_07259	TCSYLVIO_002263	TcYC6_0058880	Tc_MARK_960	TevSTIB805.7.420	DQ04_05431000, DQ04_09021010	jg2807.t1	TRSC58_03599, TRSC58_06875	Tth.21.1330
OG0001508	Yes	No	No	NA	NA	NA	Baya_071_0300	BSAL_75595	CFAC1_100013500	EMOLV88_090010300	LAEL147_000118100	LAMA_000144800	LARLEM1108_090010500	LBRM2903_090010700	LbrM.09.2.000520	LdBPK_090550.1	LdCL_090010600	LdBPK.09.2.000550	LENLEM3045_090010700, LENLEM3045_090010800	LGELEM452_090010300	LINF_090010900	LmjF.09.0500	LMJLV39_090010800	LMJSD75_090010400, LMJSD75_090010500	LmxM.09.0500	LPAL13_090010300	LPMP_090510	LpyrH10_16_1010	Lsey_0133_0100	LMARLEM2494_090010300	LtaP09.0510	LTRL590_090010100	LTULEM423_090009800	PCON_0058010	CCW62193.1	Tb427_110141900	Tb927.11.12510	Tbg972.11.13980	TcIL3000.A.H_000987700_pseudogene	TcBrA4_0108970	BCY84_01349	TCSYLVIO_006503	TcYC6_0036380	Tc_MARK_9491	TevSTIB805.11_01.12900	DQ04_07511000	jg9208.t1	TRSC58_06519	Tth.31.1900
OG0002441	Yes	No	No	NA	NA	NA	Baya_151_0100	BSAL_42730, BSAL_64945	CFAC1_080013000	EMOLV88_070010800	LAEL147_000093200	LAMA_000093200	LARLEM1108_070011400	LBRM2903_070012400	LbrM.07.2.000600	LdBPK_070590.1	LdCL_070010900	LdBPK.07.2.000590	LENLEM3045_070011600	LGELEM452_070011400	LINF_070010900	LmjF.07.0540	LMJLV39_070011600	LMJSD75_070011800	LmxM.07.0540	LPAL13_070011000	LPMP_070580	LpyrH10_30_0770	Lsey_0235_0100	LMARLEM2494_070011100	LtaP07.0540	LTRL590_070011500	LTULEM423_070012100	PCON_0035090	CCW65511.1	Tb427_080013000	Tb927.8.1300	Tbg972.8.850	TcIL3000.A.H_000570500	TcBrA4_0001080	BCY84_12638	TCSYLVIO_009762	TcYC6_0100050	Tc_MARK_8289	TevSTIB805.8.1200	DQ04_04601010	jg8146.t1	TRSC58_05324	Tth.27.1490
OG0000694	Yes	No	No	NA	NA	NA	Baya_066_0220	BSAL_69450	CFAC1_070006700	EMOLV88_030013600	LAEL147_000044900	LAMA_000049100	LARLEM1108_030014300	LBRM2903_030013700	LbrM.03.2.000780	LdBPK_030850.1	LdCL_030013800	LdBPK.03.2.000850	LENLEM3045_030013800	LGELEM452_030014200	LINF_030013800	LmjF.03.0870	LMJLV39_030014100	LMJSD75_030014200	LmxM.03.0870	LPAL13_030012900	LPMP_030820	LpyrH10_36_0220	Lsey_0153_0140	LMARLEM2494_030013600	LtaP03.0820	LTRL590_030014300	LTULEM423_030014200	PCON_0040880, PCON_0086100	CCW61466.1	Tb427_030028500	Tb927.3.2790	Tbg972.3.2860	TcIL3000.A.H_000329400	TcBrA4_0130630, TcBrA4_0130830	BCY84_15302, BCY84_15322	TCSYLVIO_004459	TcYC6_0111440, TcYC6_0111650	Tc_MARK_3250, Tc_MARK_3251, Tc_MARK_3252, Tc_MARK_3253, Tc_MARK_8078	TevSTIB805.3.2850	DQ04_00391010	jg7143.t1	TRSC58_01037	Tth.1.2610
OG0001185	Yes	No	No	NA	NA	NA	Baya_107_0030	BSAL_19125	CFAC1_250024800	EMOLV88_360020000	LAEL147_000823400	LAMA_000321200	LARLEM1108_360020700	LBRM2903_350022500	LbrM.35.2.001630	LdBPK_361550.1	LdCL_360021000	LdBPK.36.2.001550	LENLEM3045_360020800	LGELEM452_360020600	LINF_360021100	LmjF.36.1490	LMJLV39_360021000	LMJSD75_360021000	LmxM.36.1490	LPAL13_350021000	LPMP_351520	LpyrH10_09_1740	Lsey_0167_0040	LMARLEM2494_360020700	LtaP36.1480	LTRL590_360021300	LTULEM423_360021100	PCON_0015310	CCW60018.1	Tb427_100063200	Tb927.10.5910	Tbg972.10.7200	TcIL3000.A.H_000766700_pseudogene	TcBrA4_0016510, TcBrA4_0075570, TcBrA4_0075580, TcBrA4_0075590	BCY84_10842	TCSYLVIO_004928	TcYC6_0125650	Tc_MARK_3673	TevSTIB805.10.6260	DQ04_04851020	jg9536.t1	TRSC58_05532	Tth.2.3630
OG0002389	Yes	No	No	Domain LysM domain	NA	LysM domain	Baya_127_0170	BSAL_01735, BSAL_87025	CFAC1_120015000	EMOLV88_160011500	LAEL147_000230900	LAMA_000248600	LARLEM1108_160011800	LBRM2903_160013300	LbrM.16.2.000690	LdBPK_160700.1	LdCL_160012200	LdBPK.16.2.000700	LENLEM3045_160012600	LGELEM452_160012000	LINF_160012400	LmjF.16.0700	LMJLV39_160012500	LMJSD75_160012300	LmxM.16.0700	LPAL13_160010700	LPMP_160670	LpyrH10_15_0780	Lsey_0207_0090	LMARLEM2494_160012200	LtaP16.0670	LTRL590_160012500	LTULEM423_160012000	PCON_0062690	CCW64996.1	Tb427_050041100	Tb927.5.3460	Tbg972.5.4840	TcIL3000.A.H_000426500	TcBrA4_0114110	BCY84_10584	TCSYLVIO_010504	TcYC6_0066430	Tc_MARK_8880	TevSTIB805.5.3960	DQ04_01311080	jg6652.t1	TRSC58_00084	Tth.28.1110
OG0000889	Yes	No	No	NA	NA	NA	Baya_160_0130	BSAL_33415	CFAC1_250052500	EMOLV88_240023700	LAEL147_000397700	LAMA_000476300	LARLEM1108_240028600	LBRM2903_240030200	LbrM.24.2.002260	LdBPK_242270.1	LdCL_240028300	LdBPK.24.2.002270	LENLEM3045_240028700	LGELEM452_240029800	LINF_240028000	LmjF.24.2180	LMJLV39_240029700	LMJSD75_240029000	LmxM.24.2180	LPAL13_240028800	LPMP_242150	LpyrH10_11_2560	Lsey_0257_0030	LMARLEM2494_240028800	LtaP24.2340	LTRL590_240029400	LTULEM423_240028900	PCON_0066310	CCW62653.1	Tb427_080066400	Tb927.8.6070	Tbg972.8.6100	TcIL3000.A.H_000620200_pseudogene	TcBrA4_0010940, TcBrA4_0051060, TcBrA4_0051070, TcBrA4_0051080, TcBrA4_0051090	BCY84_04994	TCSYLVIO_001292	TcYC6_0083860	Tc_MARK_118	TevSTIB805.8.6330	DQ04_07911000	jg8708.t1	TRSC58_00808	Tth.15.2980
OG0001035	Yes	No	No	NA	NA	NA	Baya_003_0040, Baya_003_0050		CFAC1_030021700	EMOLV88_040016600	LAEL147_000058300	LAMA_000061500	LARLEM1108_040017600	LBRM2903_040019600, LBRM2903_040019700	LbrM.04.2.001200	LdBPK_041200.1	LdCL_040017600	LdBPK.04.2.001200	LENLEM3045_040018300	LGELEM452_040017300	LINF_040017000	LmjF.04.1180	LMJLV39_040017500	LMJSD75_040017800	LmxM.04.1180	LPAL13_040018700	LPMP_041140	LpyrH10_24_1310	Lsey_0316_0060	LMARLEM2494_040016800	LtaP04.1150	LTRL590_040016800, LTRL590_040016900	LTULEM423_040017000, LTULEM423_040017100	PCON_0067840	CCW64798.1	Tb427_090049200	Tb927.9.8760	Tbg972.9.4860	TcIL3000.A.H_000671700	TcBrA4_0055330	BCY84_19905	TCSYLVIO_007203	TcYC6_0025530	Tc_MARK_5931	TevSTIB805.9.6260	DQ04_00531150	jg6513.t1	TRSC58_06178	Tth.35.1120
OG0003083	Yes	No	No	Repeat Sperm-tail PG-rich repeat	NA	Sperm-tail PG-rich repeat	Baya_026_0260	BSAL_38720	CFAC1_020014000	EMOLV88_050011500	LAEL147_000066300	LAMA_000069000	LARLEM1108_050011800	LBRM2903_050012400	LbrM.05.2.000680	LdBPK_050690.1	LdCL_050012000	LdBPK.05.2.000690	LENLEM3045_050012000	LGELEM452_050011800	LINF_050012000	LmjF.05.0690	LMJLV39_050011800	LMJSD75_050012100	LmxM.05.0690	LPAL13_050011300	LPMP_050670	LpyrH10_07_0790	Lsey_0064_0060	LMARLEM2494_050012000	LtaP05.0680	LTRL590_050011300	LTULEM423_050011500	PCON_0069260	CCW61328.1	Tb427_070079700	Tb927.7.7200	Tbg972.7.8490	TcIL3000.A.H_000553800	TcBrA4_0043940	BCY84_07601, BCY84_17213	TCSYLVIO_001961	TcYC6_0042230	Tc_MARK_747	TevSTIB805.7.7940	DQ04_02901020	jg900.t1		Tth.38.1310
OG0001355	Yes	No	No	NA	NA	NA	Baya_016_0500	BSAL_44215	CFAC1_190027800, CFAC1_190027900	EMOLV88_320020500	LAEL147_000638900	LAMA_000670700	LARLEM1108_320023500	LBRM2903_320024600	LbrM.32.2.001830	LdBPK_321740.1	LdCL_320022900	LdBPK.32.2.001740	LENLEM3045_320023600	LGELEM452_320023300	LINF_320022300	LmjF.32.1660	LMJLV39_320022800	LMJSD75_320022800	LmxM.31.1660	LPAL13_320023100	LPMP_321750	LpyrH10_02_1920	Lsey_0001_0270	LMARLEM2494_320023000	LtaP32.1770	LTRL590_320023500	LTULEM423_320023200	PCON_0013020	CCW62816.1	Tb427_110167000	Tb927.11.14860	Tbg972.11.16670	TcIL3000.A.H_001015400	TcBrA4_0103630	BCY84_18328	TCSYLVIO_004137	TcYC6_0052560	Tc_MARK_2883	TevSTIB805.11_01.15390	DQ04_00091280	jg3577.t1	TRSC58_03360, TRSC58_06914	Tth.17.1850
OG0004242	Yes	No	No	NA	NA	NA	Baya_005_0180	BSAL_65240	CFAC1_170011200	EMOLV88_190009300	LAEL147_000279700	LAMA_000294000	LARLEM1108_190008800	LBRM2903_190012300	LbrM.19.2.000770	LdBPK_190450.1	LdCL_190009500	LdBPK.19.2.000450	LENLEM3045_190009600	LGELEM452_190009100	LINF_190009400	LmjF.19.0450	LMJLV39_190009700	LMJSD75_190009600	LmxM.19.0450		LPMP_190430	LpyrH10_04_0470	Lsey_0011_0230	LMARLEM2494_190009500	LtaP19.0430	LTRL590_190009200	LTULEM423_190009100	PCON_0052940	CCW60805.1	Tb427_100160600	Tb927.10.15190	Tbg972.10.18480	TcIL3000.A.H_000854500_pseudogene	TcBrA4_0085940	BCY84_18574	TCSYLVIO_006046	TcYC6_0114050	Tc_MARK_4754	TevSTIB805.10.15990	DQ04_04071080	jg7929.t1	TRSC58_00406	Tth.3.2400
OG0001048	Yes	No	No	NA	NA	NA	Baya_006_0850	BSAL_83355	CFAC1_210020800	EMOLV88_240011500	LAEL147_000385200	LAMA_000465200	LARLEM1108_240016400	LBRM2903_240017400	LbrM.24.2.001130	LdBPK_241140.1	LdCL_240016500	LdBPK.24.2.001140	LENLEM3045_240016600	LGELEM452_240017300	LINF_240016400	LmjF.24.1120	LMJLV39_240017200	LMJSD75_240016700	LmxM.24.1120	LPAL13_240017200	LPMP_241100	LpyrH10_11_1250	Lsey_0152_0120	LMARLEM2494_240017100	LtaP24.1230	LTRL590_240017200	LTULEM423_240016800	PCON_0049270	CCW62548.1	Tb427_080041000	Tb927.8.3590	Tbg972.8.3310	TcIL3000.A.H_000597200	TcBrA4_0019980, TcBrA4_0070700, TcBrA4_0070720	BCY84_21462	TCSYLVIO_007640	TcYC6_0063700	Tc_MARK_9280	TevSTIB805.8.3690	DQ04_08891000, DQ04_10991000	jg8795.t1	TRSC58_02556	Tth.25.1430
OG0001539	Yes	No	No	NA	NA	NA	Baya_088_0220	BSAL_31330	CFAC1_050006300	EMOLV88_010006000	LAEL147_000020100	LAMA_000027000	LARLEM1108_010006100	LBRM2903_010006100	LbrM.01.2.000150	LdBPK_010120.1	LdCL_010006200	LdBPK.01.2.000120	LENLEM3045_010006500	LGELEM452_010006100	LINF_010006100	LmjF.01.0120	LMJLV39_010006100	LMJSD75_010006200	LmxM.01.0120	LPAL13_000031900	LPMP_010120	LpyrH10_33_0010	Lsey_0072_0270	LMARLEM2494_010006200	LtaP01.0120, LtaP16.1480	LTRL590_010006100	LTULEM423_010006100	PCON_0058950	CCW64222.1	Tb427_090021500	Tb927.9.3580	Tbg972.9.1830	TcIL3000.A.H_000652500	TcBrA4_0096140	BCY84_06231, BCY84_12054	TCSYLVIO_003555	TcYC6_0085440	Tc_MARK_3797	TevSTIB805.9.2660	DQ04_04101070	jg4357.t1	TRSC58_05556	Tth.6.2450
OG0004347	Yes	No	No	NA	NA	NA	Baya_015_0010		CFAC1_230014800	EMOLV88_250024300	LAEL147_000419200	LAMA_000496500, LAMA_000496600	LARLEM1108_250024800	LBRM2903_250027200	LbrM.25.2.001380_pseudogene	LdBPK_251900.1	LdCL_250024700	LdBPK.25.2.001900	LENLEM3045_250025400	LGELEM452_250025300	LINF_250025000	LmjF.25.1820	LMJLV39_250025700	LMJSD75_250025700	LmxM.25.1820	LPAL13_250021100	LPMP_251900	LpyrH10_10_2310	Lsey_0012_0340	LMARLEM2494_250024800	LtaP25.1910	LTRL590_250025400	LTULEM423_250025500	PCON_0056170		Tb427_030018700	Tb11.v5.0664, Tb927.3.1900	Tbg972.3.1790	TcIL3000.A.H_000322000	TcBrA4_0082530	BCY84_13550	TCSYLVIO_006369	TcYC6_0119490	Tc_MARK_5073	TevSTIB805.3.1910	DQ04_05311040	jg2978.t1		Tth.11.1670
OG0005756	Yes	No	No	NA	NA	NA	Baya_072_0090		CFAC1_090010700	EMOLV88_170008500	LAEL147_000245900	LAMA_000262100	LARLEM1108_170009500	LBRM2903_170010200	LbrM.17.2.000420	LdBPK_170490.1	LdCL_170010400	LdBPK.17.2.000490	LENLEM3045_170009100	LGELEM452_000010000	LINF_170010700	LmjF.17.0440	LMJLV39_170010100	LMJSD75_170009800	LmxM.17.0440	LPAL13_170009400	LPMP_170400	LpyrH10_21_0350	Lsey_0154_0060	LMARLEM2494_170009200	LtaP17.0460	LTRL590_170008800	LTULEM423_170009100	PCON_0052120		Tb427_070072400	Tb927.7.6640	Tbg972.7.7720	TcIL3000.A.H_000548500	TcBrA4_0135360	BCY84_22037	TCSYLVIO_009074	TcYC6_0048050	Tc_MARK_7739	TevSTIB805.7.7260	DQ04_11481000	jg8292.t1		Tth.20.2160
OG0000323	Yes	No	No	Domain Protein kinase domain	protein phosphorylation	Protein kinase domain	Baya_064_0240	BSAL_23410	CFAC1_160028000	EMOLV88_260028700	LAEL147_000450900	LAMA_000525700	LARLEM1108_260030100	LBRM2903_260029600	LbrM.26.2.002370	LdBPK_262460.1	LdCL_260030400	LdBPK.26.2.002460	LENLEM3045_260030100	LGELEM452_260030100	LINF_260030000	LmjF.26.2440	LMJLV39_260031100	LMJSD75_260029500	LmxM.26.2440	LPAL13_260028900	LPMP_262410	LpyrH10_31_0340	Lsey_0037_0280	LMARLEM2494_260028500	LtaP26.2590	LTRL590_260029900	LTULEM423_260030100	PCON_0051580		Tb427_090007800	Tb11.v5.0874, Tb927.9.1670	Tbg972.9.370	TcIL3000.A.H_000643300	TcBrA4_0071720, TcBrA4_0071740, TcBrA4_0097130, TcBrA4_0097140, TcBrA4_0097170	BCY84_01924, BCY84_12191, BCY84_12203	TCSYLVIO_003636	TcYC6_0020850, TcYC6_0020880, TcYC6_0020890, TcYC6_0020910, TcYC6_0020930, TcYC6_0020950, TcYC6_0020970, TcYC6_0020990, TcYC6_0021010, TcYC6_0021020, TcYC6_0021040, TcYC6_0021080, TcYC6_0021100, TcYC6_0021190, TcYC6_0021200, TcYC6_0023990, TcYC6_0024000, TcYC6_0086670, TcYC6_0087050, TcYC6_0087070, TcYC6_0087100, TcYC6_0087120, TcYC6_0087150, TcYC6_0087170	Tc_MARK_2396	TevSTIB805.9.1300	DQ04_02681080	jg9285.t1	TRSC58_04367	Tth.2.1280
OG0002953	Yes	No	No	Family Histone H1-like nucleoprotein HC2	chromosome condensation	Histone H1-like nucleoprotein HC2	Baya_016_0250	BSAL_47015c	CFAC1_190030900	EMOLV88_320022900	LAEL147_000641500	LAMA_000673400	LARLEM1108_320026100	LBRM2903_320027500	LbrM.32.2.002100	LdBPK_322020.1	LdCL_320025600	LdBPK.32.2.002020	LENLEM3045_320026300	LGELEM452_320026000	LINF_320025000	LmjF.32.1910	LMJLV39_320025600	LMJSD75_320025600	LmxM.31.1910	LPAL13_320025700	LPMP_322010	LpyrH10_02_2200	Lsey_0001_0010	LMARLEM2494_320025700	LtaP32.2040	LTRL590_320026000	LTULEM423_320025900	PCON_0013280		Tb427_110169500	Tb927.11.15100	Tbg972.11.16960	TcIL3000.A.H_001017900	TcBrA4_0103280	BCY84_04534, BCY84_18299	TCSYLVIO_004114	TcYC6_0052210	Tc_MARK_2855	TevSTIB805.11_01.15630	DQ04_00281160	jg3607.t1		Tth.17.1560, Tth.17.1570
OG0001281	Yes	No	No	NA	NA	NA	Baya_002_1000	BSAL_17030	CFAC1_260058600	EMOLV88_300039400	LAEL147_000582100	LAMA_000619000	LARLEM1108_300039900	LBRM2903_300040700	LbrM.30.2.003370	LdBPK_303380.1	LdCL_300039400	LdBPK.30.2.003380	LENLEM3045_300040200	LGELEM452_300040400	LINF_300039000	LmjF.30.3330	LMJLV39_300042100	LMJSD75_300041300	LmxM.29.3330	LPAL13_300037900	LPMP_303300	LpyrH10_04_6390	Lsey_0227_0010	LMARLEM2494_300040100	LtaP30.3370	LTRL590_300036800	LTULEM423_300040100	PCON_0026300	CCW61518.1, CCW61630.1	Tb427_060036900	Tb927.6.3180	Tbg972.6.2970	TcIL3000.A.H_000467500	TcBrA4_0029230	BCY84_01002	TCSYLVIO_003226	TcYC6_0096820	Tc_MARK_1937	TevSTIB805.6.3270	DQ04_00361220	jg1205.t1	TRSC58_05787	Tth.7.3150, Tth.7.3160
OG0000921	Yes	No	No	NA	NA	NA	Baya_013_0280	BSAL_92025	CFAC1_290049300	EMOLV88_340022400	LAEL147_000722400	LAMA_000744100	LARLEM1108_340020300	LBRM2903_200026200	LbrM.20.2.001570	LdBPK_341830.1	LdCL_340026000	LdBPK.34.2.001830	LENLEM3045_340022000	LGELEM452_340019400	LINF_340025900	LmjF.34.2080	LMJLV39_340025500	LMJSD75_340026100, LMJSD75_340026200	LmxM.33.2080	LPAL13_200022900	LPMP_201750	LpyrH10_05_2210	Lsey_0005_0180	LMARLEM2494_340023300, LMARLEM2494_340023700	LtaP34.1920	LTRL590_340024100	LTULEM423_340019200	PCON_0009060, PCON_0009070		Tb427_040028500	Tb11.v5.0630, Tb927.4.2600	Tbg972.4.2560	TcIL3000.A.H_000374900_pseudogene	TcBrA4_0123230	BCY84_18973	TCSYLVIO_003896, TCSYLVIO_003897	TcYC6_0089090	Tc_MARK_415	TevSTIB805.4.2700	DQ04_00931120	jg4155.t1	TRSC58_07251	Tth.1.4660
OG0001459	Yes	No	No	Binding_site IQ motif, EF-hand binding site	protein binding	IQ calmodulin-binding motif	Baya_050_0230	BSAL_55830	CFAC1_300042700	EMOLV88_280028100	LAEL147_000509900	LAMA_000581400	LARLEM1108_280034000	LBRM2903_280035200	LbrM.28.2.002820	LdBPK_282810.1	LdCL_280033200	LdBPK.28.2.002810	LENLEM3045_280034800	LGELEM452_280034400	LINF_280033400	LmjF.28.2610	LMJLV39_280034500	LMJSD75_280034000	LmxM.28.2610	LPAL13_280034200	LPMP_282770	LpyrH10_02_4930	Lsey_0271_0080	LMARLEM2494_280036000	LtaP28.2680	LTRL590_280033700	LTULEM423_280033600	PCON_0024190	CCW62240.1	Tb427_110135400	Tb927.11.11880	Tbg972.11.13340	TcIL3000.A.H_000981900_pseudogene	TcBrA4_0077410	BCY84_15951	TCSYLVIO_002684	TcYC6_0011720	Tc_MARK_6243	TevSTIB805.11_01.12260	DQ04_01711010, DQ04_01711020, DQ04_01711030	jg5863.t1	TRSC58_03723	Tth.24.1540
OG0003617	Yes	No	No	NA	NA	NA	Baya_091_0070		CFAC1_210036300	EMOLV88_270022300	LAEL147_000473400	LAMA_000546400	LARLEM1108_270024600, LARLEM1108_270025000	LBRM2903_270025500	LbrM.27.2.001910	LdBPK_271690.1	LdCL_270024000	LdBPK.27.2.001690	LENLEM3045_270024800	LGELEM452_270025300	LINF_270024700	LmjF.27.1790	LMJLV39_270024700	LMJSD75_270024900	LmxM.27.1790	LPAL13_270025600	LPMP_271770	LpyrH10_03_4850	Lsey_0151_0140	LMARLEM2494_270024500	LtaP27.1840	LTRL590_270024600	LTULEM423_270024500	PCON_0010990		Tb427_020019300	Tb927.2.4160	Tbg.972.2.2320	TcIL3000.A.H_000300100_pseudogene	TcBrA4_0101070	BCY84_02899	TCSYLVIO_000417	TcYC6_0076660	Tc_MARK_9658	TevSTIB805.2.2170	DQ04_10731000, DQ04_10731010	jg4796.t1	TRSC58_04744	Tth.23.1770
OG0005304	Yes	No	No	NA	NA	NA	Baya_053_0300		CFAC1_290020100	EMOLV88_260016200	LAEL147_000437600	LAMA_000513500_pseudogene	LARLEM1108_260016900	LBRM2903_260017100	LbrM.26.2.001210	LdBPK_261170.1	LdCL_260017300	LdBPK.26.2.001170	LENLEM3045_260016500	LGELEM452_260016900	LINF_260016900	LmjF.26.1190	LMJLV39_260017600	LMJSD75_260016000	LmxM.26.1190	LPAL13_260016600	LPMP_261170	LpyrH10_01_9150	Lsey_0206_0070	LMARLEM2494_260015900	LtaP26.1120	LTRL590_260016700	LTULEM423_260016900	PCON_0006210		Tb427_070010900	Tb927.7.750	Tbg972.7.680	TcIL3000.A.H_000493900_pseudogene	TcBrA4_0106260	BCY84_13450	TCSYLVIO_002295	TcYC6_0056060	Tc_MARK_1016	TevSTIB805.7.700	DQ04_03001060	jg2762.t1	TRSC58_06190	Tth.21.1640
OG0004747	Yes	No	No	Domain EF-hand domain	calcium ion binding	EF hand	Baya_085_0030, Baya_085_0040, Baya_085_0050	BSAL_47570	CFAC1_220018400	EMOLV88_250015100	LAEL147_000409800	LAMA_000488200	LARLEM1108_250015500	LBRM2903_250017400	LbrM.25.2.000850	LdBPK_251000.1	LdCL_250015300	LdBPK.25.2.001000	LENLEM3045_250015400	LGELEM452_250015400	LINF_250015600	LmjF.25.0970	LMJLV39_250016000	LMJSD75_250015900	LmxM.25.0970	LPAL13_250015900	LPMP_250990	LpyrH10_10_1250	Lsey_0054_0030	LMARLEM2494_250015200	LtaP25.1020	LTRL590_250015900	LTULEM423_250015700	PCON_0063770		Tb427_030008900	Tb927.3.920	Tbg972.3.560	TcIL3000.A.H_000313100_pseudogene	TcBrA4_0091570	BCY84_21156	TCSYLVIO_003540	TcYC6_0117490	Tc_MARK_2316	TevSTIB805.3.850	DQ04_00871070	jg2868.t1		Tth.33.1400
OG0001343	Yes	No	No	Binding_site IQ motif, EF-hand binding site	protein binding	IQ calmodulin-binding motif	Baya_013_0210, Baya_013_0220	BSAL_92005	CFAC1_290048500	EMOLV88_340021800	LAEL147_000721700		LARLEM1108_340019600	LBRM2903_200025600	LbrM.20.2.001530	LdBPK_341780.1	LdCL_340025400	LdBPK.34.2.001780	LENLEM3045_340021400	LGELEM452_340018700	LINF_340025300	LmjF.34.2030	LMJLV39_340024800	LMJSD75_340025300	LmxM.33.2030	LPAL13_200022300	LPMP_201700	LpyrH10_05_2130	Lsey_0005_0120	LMARLEM2494_000014400, LMARLEM2494_340022600	LtaP34.1860	LTRL590_340023400	LTULEM423_340018400	PCON_0008990	CCW60601.1	Tb427_040028900	Tb927.4.2640	Tbg972.4.2590	TcIL3000.A.H_000375200	TcBrA4_0123130	BCY84_18980	TCSYLVIO_010954	TcYC6_0088970	Tc_MARK_2585	TevSTIB805.4.2740	DQ04_01641110	jg4160.t1	TRSC58_02876	Tth.1.4610
OG0000845	Yes	No	No	NA	NA	NA	Baya_023_0390		CFAC1_270062600	EMOLV88_310031200	LAEL147_000616100	LAMA_000649800	LARLEM1108_310037100	LBRM2903_310040900	LbrM.31.2.003110	LdBPK_312850.1	LdCL_310036800	LdBPK.31.2.002850	LENLEM3045_310017900	LGELEM452_310035000, LGELEM452_310035100	LINF_310036200	LmjF.31.2760	LMJLV39_310038000	LMJSD75_310038000	LmxM.30.2760	LPAL13_310034000	LPMP_312610	LpyrH10_29_0860	Lsey_0210_0030	LMARLEM2494_310018600	LtaP31.3220	LTRL590_310041400	LTULEM423_310035700	PCON_0067310	CCW65442.1	Tb427_040054600, Tb427_080078900	Tb927.4.5120, Tb927.8.7260	Tbg972.4.5305, Tbg972.8.7560	TcIL3000.A.H_000633000	TcBrA4_0041540, TcBrA4_0120380, TcBrA4_0120870	BCY84_00738, BCY84_00764		TcYC6_0104120	Tc_MARK_1545	TevSTIB805.4.5340, TevSTIB805.8.7620	DQ04_09991040			Tth.44.1580
OG0004708	Yes	No	No	NA	NA	NA	Baya_076_0270	BSAL_38405	CFAC1_210038600	EMOLV88_330033400	LAEL147_000696200	LAMA_000723900	LARLEM1108_330033800	LBRM2903_330038400	LbrM.33.2.003040	LdBPK_332900.1	LdCL_330036100	LdBPK.33.2.002900	LENLEM3045_330036600	LGELEM452_330037200	LINF_330036900	LmjF.33.2760	LMJLV39_330038800	LMJSD75_330038300	LmxM.32.2760	LPAL13_330036800	LPMP_332880	LpyrH10_03_5090	Lsey_0092_0080	LMARLEM2494_330035600	LtaP33.3000	LTRL590_330036400	LTULEM423_330036900		CCW63678.1	Tb427_020017300	Tb927.2.3730	Tbg.972.2.2020	TcIL3000.A.H_000298100	TcBrA4_0101340	BCY84_02868	TCSYLVIO_000386	TcYC6_0077290	Tc_MARK_9626	TevSTIB805.2.1960	DQ04_03861030	jg4771.t1	TRSC58_05699	Tth.23.1990
OG0005374	Yes	No	No	NA	NA	NA	Baya_084_0010	BSAL_15490	CFAC1_140010400	EMOLV88_180008600	LAEL147_000262200	LAMA_000276800	LARLEM1108_180009100	LBRM2903_180009100	LbrM.18.2.000410	LdBPK_180390.1	LdCL_180008800	LdBPK.18.2.000390	LENLEM3045_180009500	LGELEM452_180009000	LINF_180008900	LmjF.18.0390	LMJLV39_180009300	LMJSD75_180009200	LmxM.18.0390	LPAL13_180008800	LPMP_180380	LpyrH10_13_0530	Lsey_0236_0130	LMARLEM2494_180009100	LtaP18.0410	LTRL590_180009200	LTULEM423_180009000	PCON_0038110		Tb427_100147000	Tb927.10.13890	Tbg972.10.17070	TcIL3000.A.H_000841000_pseudogene	TcBrA4_0084510	BCY84_18713	TCSYLVIO_006167	TcYC6_0115540	Tc_MARK_4877	TevSTIB805.10.14590	DQ04_00191120	jg7777.t1		Tth.3.3800
OG0000854	Yes	No	No	NA	NA	NA	Baya_039_0040	BSAL_06060, BSAL_27605, BSAL_62645, BSAL_77960, BSAL_77965, BSAL_79085	CFAC1_280036500	EMOLV88_360039500	LAEL147_000845300	LAMA_000339700	LARLEM1108_360042400	LBRM2903_350044800	LbrM.35.2.003530	LdBPK_363460.1	LdCL_360041500	LdBPK.36.2.003460	LENLEM3045_360042400	LGELEM452_360042000	LINF_360041500	LmjF.36.3300	LMJLV39_360043000	LMJSD75_360042900	LmxM.36.3300	LPAL13_350041700	LPMP_353380	LpyrH10_06_0890	Lsey_0091_0240	LMARLEM2494_360041700	LtaP36.3400	LTRL590_360042900	LTULEM423_360042300	PCON_0042080	CCW65652.1	Tb427_110109800	Tb927.11.10120	Tbg972.11.11370	TcIL3000.A.H_000959500_pseudogene	TcBrA4_0025220	BCY84_11791	TCSYLVIO_008181	TcYC6_0006300	Tc_MARK_7124	TevSTIB805.11_01.10430	DQ04_01741000	jg5556.t1	TRSC58_00822	Tth.6.4050
OG0001829	Yes	No	No	NA	NA	NA	Baya_010_0080	BSAL_12795, BSAL_12980	CFAC1_240031600	EMOLV88_350010000	LAEL147_000755400	LAMA_000773400	LARLEM1108_350011200	LBRM2903_340011100	LbrM.34.2.000610	LdBPK_350610.1	LdCL_350011000	LdBPK.35.2.000610	LENLEM3045_350010900	LGELEM452_350011300	LINF_350010800	LmjF.35.0610	LMJLV39_350011800	LMJSD75_350011300	LmxM.34.0610	LPAL13_340010900	LPMP_340550	LpyrH10_01_2310	Lsey_0412_0040	LMARLEM2494_350010900	LtaP35.0740	LTRL590_350010900	LTULEM423_350011100	PCON_0019420	CCW64750.1	Tb427_100042800	Tb927.10.3820	Tbg972.10.4750	TcIL3000.A.H_000748200_pseudogene	TcBrA4_0098410	BCY84_19617	TCSYLVIO_005096	TcYC6_0046860	Tc_MARK_3843	TevSTIB805.10.4050	DQ04_04081000	jg7367.t1	TRSC58_03895	Tth.42.1390
OG0001283	Yes	No	No	Domain BILBO1, N-terminal domain	calcium ion binding	BILBO1 N-terminal domain	Baya_002_1090	BSAL_32335, BSAL_39075, BSAL_45065, BSAL_66480	CFAC1_260042100		LAEL147_000567100	LAMA_000604800	LARLEM1108_300025200	LBRM2903_300025100	LbrM.30.2.001910	LdBPK_301960.1	LdCL_300024900	LdBPK.30.2.001960	LENLEM3045_300025300	LGELEM452_300025600	LINF_300024500	LmjF.30.1975	LMJLV39_300026100, LMJLV39_300026200	LMJSD75_300025900, LMJSD75_300026000	LmxM.29.1975	LPAL13_300023500	LPMP_301920	LpyrH10_04_4640	Lsey_0009_0040	LMARLEM2494_300025200	LtaP30.1970	LTRL590_300025000	LTULEM423_300025300	PCON_0026380		Tb427_060037500	Tb927.6.3240	Tbg972.6.3030	TcIL3000.A.H_000468200	TcBrA4_0029160	BCY84_01009	TCSYLVIO_003231	TcYC6_0096890	Tc_MARK_1942	TevSTIB805.6.3330	DQ04_00361140	jg1196.t1		Tth.7.3070
OG0000407	Yes	No	No	NA	NA	NA	Baya_099_0210		CFAC1_300049800, CFAC1_300049900	EMOLV88_320041600, EMOLV88_320041700	LAEL147_000661900, LAEL147_000662000	LAMA_000692600, LAMA_000692700	LARLEM1108_320046000, LARLEM1108_320046100	LBRM2903_320049700, LBRM2903_320049800	LbrM.32.2.004010, LbrM.32.2.004020	LdBPK_323920.1, LdBPK_323930.1	LdCL_320045200, LdCL_320045300	LdBPK.32.2.003920, LdBPK.32.2.003930	LENLEM3045_320046100, LENLEM3045_320046200	LGELEM452_320046000, LGELEM452_320046100	LINF_320044900, LINF_320045000	LmjF.32.3770, LmjF.32.3780	LMJLV39_320045600, LMJLV39_320045700	LMJSD75_320045700, LMJSD75_320045800	LmxM.31.3770, LmxM.31.3780	LPAL13_320046300, LPAL13_320046400	LPMP_323900, LPMP_323910	LpyrH10_02_4240, LpyrH10_02_4250	Lsey_0246_0120, Lsey_0246_0130	LMARLEM2494_320046400, LMARLEM2494_320046500	LtaP32.3940, LtaP32.3950	LTRL590_320045900, LTRL590_320046000	LTULEM423_320046500, LTULEM423_320046600	PCON_0037600	CCW60286.1	Tb427_110183600	Tb927.11.16400	Tbg972.11.18440	TcIL3000.A.H_001030000	TcBrA4_0035640	BCY84_01488		TcYC6_0049680	Tc_MARK_2710	TevSTIB805.11_01.16980	DQ04_00031230	jg3833.t1		Tth.22.2670
OG0001298	Yes	No	No	Binding_site IQ motif, EF-hand binding site	protein binding	IQ calmodulin-binding motif	Baya_004_0730	BSAL_18585	CFAC1_300077100	EMOLV88_350031600	LAEL147_000778500	LAMA_000794200	LARLEM1108_350034100	LBRM2903_340034900	LbrM.34.2.002670	LdBPK_352820.1	LdCL_350033100	LdBPK.35.2.002820	LENLEM3045_350033900	LGELEM452_350033800	LINF_350033000	LmjF.35.2770	LMJLV39_350034700	LMJSD75_350034000	LmxM.34.2770	LPAL13_340032200	LPMP_342610	LpyrH10_01_4960	Lsey_0008_0210	LMARLEM2494_350033400	LtaP35.2790	LTRL590_350033300	LTULEM423_350034200	PCON_0001390	CCW62122.1	Tb427_090077200	Tb11.v5.0665, Tb927.9.12990	Tbg972.9.8000	TcIL3000.A.H_000699700	TcBrA4_0062640	BCY84_13991	TCSYLVIO_005869	TcYC6_0068840	Tc_MARK_4493	TevSTIB805.9.9340	DQ04_00151300	jg6192.t1	TRSC58_00826, TRSC58_06085	Tth.4.4050
OG0002028	Yes	No	No	Domain ATPase, AAA-type, core	ATPase	ATPase family associated with various cellular activities (AAA)	Baya_032_0350		CFAC1_180018600	EMOLV88_200015500	LAEL147_000304600	LAMA_000388300	LARLEM1108_200016900	LBRM2903_200067100, LBRM2903_200067200	LbrM.20.2.005250	LdBPK_201110.1	LdCL_200015800	LdBPK.20.2.001110	LENLEM3045_200017000	LGELEM452_200016600	LINF_200016000	LmjF.20.1090	LMJLV39_200016500	LMJSD75_200016300	LmxM.20.1090	LPAL13_200059300	LPMP_205260	LpyrH10_25_0730	Lsey_0039_0160	LMARLEM2494_200016100	LtaP20.1070	LTRL590_200016600	LTULEM423_200016400	PCON_0060050	CCW64460.1	Tb427_010014800	Tb927.1.1890	Tbg972.1.1080	TcIL3000.A.H_000283800	TcBrA4_0037700	BCY84_01691	TCSYLVIO_007330, TCSYLVIO_007331	TcYC6_0016870	Tc_MARK_6043	TevSTIB805.1.1820	DQ04_01891030	jg740.t1	TRSC58_04312	Tth.14.1920
OG0002383	Yes	No	No	NA	NA	NA	Baya_124_0140	BSAL_18245	CFAC1_150023100	EMOLV88_230016700	LAEL147_000364900	LAMA_000446800	LARLEM1108_230019400	LBRM2903_230020700	LbrM.23.2.001130	LdBPK_231250.1	LdCL_230019600	LdBPK.23.2.001250_pseudogene	LENLEM3045_230019500	LGELEM452_230018900	LINF_230019000	LmjF.23.1025	LMJLV39_230019700	LMJSD75_230020000	LmxM.23.1025	LPAL13_230018800	LPMP_231170	LpyrH10_03_2380	Lsey_0406_0060	LMARLEM2494_230018900	LtaP23.1290	LTRL590_230019100	LTULEM423_230019100	PCON_0065410	CCW65337.1	Tb427_080034600	Tb927.8.3000	Tbg972.8.2680	TcIL3000.A.H_000591200	TcBrA4_0137470	BCY84_02414	TCSYLVIO_000162	TcYC6_0030730	Tc_MARK_9413	TevSTIB805.8.3070	DQ04_03511020	jg4619.t1	TRSC58_01109	Tth.13.1770
OG0002821	Yes	No	No	NA	NA	NA	Baya_009_0230	BSAL_77290	CFAC1_180023500	EMOLV88_060011100	LAEL147_000078700	LAMA_000080600	LARLEM1108_060011300	LBRM2903_060011700	LbrM.06.2.000600	LdBPK_060610.1	LdCL_060011200	LdBPK.06.2.000610	LENLEM3045_060010900	LGELEM452_060011200	LINF_060011500	LmjF.06.0590	LMJLV39_060011600	LMJSD75_060011600	LmxM.06.0590	LPAL13_060011400	LPMP_060570	LpyrH10_03_0720	Lsey_0081_0210	LMARLEM2494_060011100	LtaP06.0540	LTRL590_060011000	LTULEM423_060011200	PCON_0007460	CCW61100.1	Tb427_070057600	Tb927.7.5190	Tbg972.7.5970	TcIL3000.A.H_000536700	TcBrA4_0088250	BCY84_16470	TCSYLVIO_001830	TcYC6_0046100, TcYC6_0127940	Tc_MARK_640	TevSTIB805.7.5630	DQ04_02821060	jg2569.t1		Tth.36.1410
OG0001405	Yes	No	No	NA	NA	NA	Baya_029_0590	BSAL_23640, BSAL_23780, BSAL_39685, BSAL_88825	CFAC1_100013800	EMOLV88_090010500	LAEL147_000118400	LAMA_000145100	LARLEM1108_090010800	LBRM2903_090011000	LbrM.09.2.000550	LdBPK_090580.1	LdCL_090010900	LdBPK.09.2.000580	LENLEM3045_090011100	LGELEM452_090010600	LINF_090011200	LmjF.09.0530	LMJLV39_090011100	LMJSD75_090010800	LmxM.09.0530	LPAL13_090010600	LPMP_090540	LpyrH10_16_1050	Lsey_0133_0070	LMARLEM2494_090010600	LtaP09.0540	LTRL590_090010400	LTULEM423_090010100			Tb427_110142200	Tb927.11.12540	Tbg972.11.14010	TcIL3000.A.H_000988000	TcBrA4_0108940	BCY84_01352	TCSYLVIO_006506	TcYC6_0036410	Tc_MARK_9487, Tc_MARK_9488	TevSTIB805.11_01.12930	DQ04_04911000	jg9205.t1	TRSC58_05468	Tth.31.1870
OG0005099	Yes	No	No	NA	NA	NA	Baya_006_0440		CFAC1_210016400	EMOLV88_240007500	LAEL147_000381100	LAMA_000461100	LARLEM1108_240012300	LBRM2903_240013400	LbrM.24.2.000750	LdBPK_240750.1	LdCL_240012500	LdBPK.24.2.000750	LENLEM3045_240012400	LGELEM452_240013100	LINF_240012400	LmjF.24.0740	LMJLV39_240013000	LMJSD75_240012600	LmxM.24.0740	LPAL13_240013100	LPMP_240710	LpyrH10_11_0810	Lsey_0131_0120	LMARLEM2494_240012700	LtaP24.0810	LTRL590_240013100	LTULEM423_240012700			Tb427_110059200	Tb927.11.5410	Tbg972.11.6100	TcIL3000.A.H_000913200	TcBrA4_0009080	BCY84_02260	TCSYLVIO_001504	TcYC6_0081640	Tc_MARK_6726, Tc_MARK_6809	TevSTIB805.11_01.5600	DQ04_05521060	jg8510.t1	TRSC58_01164	Tth.43.1170
OG0000716	Yes	No	No	NA	NA	NA	Baya_305_0040	BSAL_87470	CFAC1_210044100	EMOLV88_330037100	LAEL147_000701300	LAMA_000728000	LARLEM1108_330039300	LBRM2903_330043000	LbrM.33.2.003440	LdBPK_333320.1	LdCL_330040800	LdBPK.33.2.003320	LENLEM3045_330041500	LGELEM452_330042400	LINF_330041800	LmjF.33.3170	LMJLV39_330044900	LMJSD75_330043700	LmxM.32.3170	LPAL13_330041100	LPMP_333280	LpyrH10_03_5620	Lsey_0124_0100	LMARLEM2494_330040100	LtaP33.3420	LTRL590_330041200	LTULEM423_330042500	PCON_0074910	CCW63702.1	Tb427_020031300	Tb927.2.5950	Tbg.972.2.4180	TcIL3000.A.H_000042100_pseudogene	TcBrA4_0099780, TcBrA4_0101900	BCY84_02892, BCY84_05560, BCY84_10228	TCSYLVIO_000409, TCSYLVIO_000410, TCSYLVIO_000411	TcYC6_0077030, TcYC6_0077840, TcYC6_0078060	Tc_MARK_9502, Tc_MARK_9652	TevSTIB805.2.3390		jg4717.t1	TRSC58_02290	Tth.23.2550
OG0001924	Yes	No	No	NA	NA	NA	Baya_019_0300	BSAL_43170	CFAC1_190039400	EMOLV88_320029900	LAEL147_000649400	LAMA_000680800	LARLEM1108_320033600	LBRM2903_320035800	LbrM.32.2.002830	LdBPK_322740.1	LdCL_320033200	LdBPK.32.2.002740	LENLEM3045_320034200	LGELEM452_320033600	LINF_320032900	LmjF.32.2600	LMJLV39_320033300	LMJSD75_320033600	LmxM.31.2600	LPAL13_320033600	LPMP_322740	LpyrH10_02_3000	Lsey_0010_0060	LMARLEM2494_320034000	LtaP32.2790	LTRL590_320033600	LTULEM423_320033900	PCON_0016860	CCW60386.1	Tb427_110176400	Tb11.v5.0770, Tb927.11.15790	Tbg972.11.17710	TcIL3000.A.H_001024100	TcBrA4_0102210	BCY84_18181	TCSYLVIO_004032	TcYC6_0051020	Tc_MARK_3421	TevSTIB805.11_01.16330	DQ04_03111060	jg3699.t1	TRSC58_06414	Tth.22.1320
OG0003920	Yes	No	No	NA	NA	NA	Baya_166_0050	BSAL_68475	CFAC1_130028500	EMOLV88_210025900	LAEL147_000333800	LAMA_000417200	LARLEM1108_210027100	LBRM2903_210027200	LbrM.33.2.000910	LdBPK_212220.1	LdCL_210027900	LdBPK.21.2.002220	LENLEM3045_210027200	LGELEM452_210026800	LINF_210028300	LmjF.21.1850	LMJLV39_210028000	LMJSD75_210028200	LmxM.21.1850	LPAL13_210025300	LPMP_212160	LpyrH10_14_2380	Lsey_0467_0050	LMARLEM2494_210027800	LtaP21.2160	LTRL590_210027700	LTULEM423_210027600	PCON_0050040	CCW62899.1	Tb427_100005900	Tb927.10.250	Tbg972.10.160	TcIL3000.A.H_000713400	TcBrA4_0045130	BCY84_11583	TCSYLVIO_009371	TcYC6_0022070	Tc_MARK_5331	TevSTIB805.10.290	DQ04_02101150	jg1669.t1		Tth.48.1130
OG0003848	Yes	No	No	Domain Cullin, N-terminal	ubiquitin protein ligase binding	Cullin family	Baya_140_0080	BSAL_18395, BSAL_18405	CFAC1_120022500	EMOLV88_160017000	LAEL147_000236400	LAMA_000253800	LARLEM1108_160017800	LBRM2903_160020200	LbrM.16.2.001260	LdBPK_161270.1	LdCL_160017900	LdBPK.16.2.001270	LENLEM3045_160018400	LGELEM452_160017800	LINF_160018000	LmjF.16.1220	LMJLV39_160018500	LMJSD75_160018100	LmxM.16.1220	LPAL13_160017100	LPMP_161180	LpyrH10_15_1800	Lsey_0180_0040	LMARLEM2494_160017400	LtaP16.1210	LTRL590_160019300	LTULEM423_160017500	PCON_0058620		Tb427_080057400	Tb927.8.5210	Tbg972.8.5110	TcIL3000.A.H_000612000	TcBrA4_0005950	BCY84_15980	TCSYLVIO_007548	TcYC6_0055440	Tc_MARK_10249	TevSTIB805.8.5400	DQ04_02551060	jg9335.t1		Tth.10.1560
OG0005303	Yes	No	No	Domain BRCT domain	NA	twin BRCT domain	Baya_053_0260		CFAC1_290020600	EMOLV88_260016600	LAEL147_000438000	LAMA_000513900	LARLEM1108_260017300	LBRM2903_260017500	LbrM.26.2.001250_pseudogene	LdBPK_261210.1	LdCL_260017700	LdBPK.26.2.001210	LENLEM3045_260016900	LGELEM452_260017300	LINF_260017300	LmjF.26.1230	LMJLV39_260018000	LMJSD75_260016400	LmxM.26.1230	LPAL13_260017000	LPMP_261210	LpyrH10_01_9190	Lsey_0206_0030	LMARLEM2494_260016300	LtaP26.1160	LTRL590_260017100	LTULEM423_260017300	PCON_0006240		Tb427_070010600	Tb927.7.720	Tbg972.7.650	TcIL3000.A.H_000493600_pseudogene	TcBrA4_0106230	BCY84_13453	TCSYLVIO_002292	TcYC6_0056590	Tc_MARK_1013	TevSTIB805.7.670	DQ04_07191000	jg2765.t1	TRSC58_00290	Tth.21.1610
OG0000858	Yes	No	No	NA	NA	NA	Baya_045_0130, Baya_368_0010		CFAC1_270022500	EMOLV88_310013500	LAEL147_000596000	LAMA_000632200	LARLEM1108_310015900, LARLEM1108_310016000	LBRM2903_310019800	LbrM.31.2.001200	LdBPK_311000.1	LdCL_310016600	LdBPK.31.2.001000	LENLEM3045_310010200	LGELEM452_000013300, LGELEM452_310015100	LINF_310016100	LmjF.31.1000	LMJLV39_310016100	LMJSD75_310015700	LmxM.30.1000	LPAL13_310015800	LPMP_310920	LpyrH10_12_1960	Lsey_0230_0060	LMARLEM2494_000007500	LtaP31.0950	LTRL590_000012000, LTRL590_310016000	LTULEM423_310015100	PCON_0078380	CCW65599.1, CCW65789.1	Tb427_070028500	Tb927.7.2390	Tbg972.7.2660	TcIL3000.A.H_000513600	TcBrA4_0092020	BCY84_17439	TCSYLVIO_001243	TcYC6_0092980	Tc_MARK_42	TevSTIB805.7.2460	DQ04_08691000, DQ04_27331000	jg2243.t1		Tth.19.1420, Tth.19.1430
[truncated: 18,198 more rows]
[truncated: 48 more columns]

## Sheet: RIT-seq comparison
Cell cycle RIT-seq comparision for common cell cycle regulated genes. RIT-seq resulted published by Marques et al 2022, Nature Comms.
427 common CCR genes are lised with the TREU927 ortholog, product description and gene name.
[truncated: 1,016 more rows]

## Sheet: EG1 gene GO
GO terms enriched for early G1 peaking common CCR genes, classified by the BSF cell cycle
ID	Name	Bgd count	Result count	Result gene list	Pct of bgd	Fold enrichment	Odds ratio	P-value	Benjamini	Bonferroni
[truncated: 7 more rows]

## Sheet: LG1 GO
GO terms enriched for late G1 peaking common CCR genes, classified by the BSF cell cycle
[truncated: 120 more rows]

[truncated: 4 more sheets: S GO, G2M Go, plotted GO, RBPs]
