# Supplementary material for: Profiling the bloodstream form and procyclic form Trypanosoma brucei cell cycle using single-cell transcriptomics
Source: eLife. 2023 May 11;12:e86325. doi: 10.7554/eLife.86325 (PMC10212563; doi:10.7554/eLife.86325)
Supplement: Supplementary file 8. [file elife-86325-supp8.xlsx]

## Sheet: Sheet1
	gene	927 ortholog	Tagging forward	tagging reverse	sgRNA	Inster check forward	insert check reverse
N tag	Tb427_080028700	Tb927.8.2550	ATCTGAAGAAAATAATATACAAGAGACAAGgtataatgcagacctgctgc	TTGCTGTGATGGTAAGGTGATGCGGAGCATactacccgatcctgatccag	gaaattaatacgactcactataggGCGGGACACGCAACACTACAgttttagagctagaaatagc	TGCAATAATACCACGCGGGGGC	GCAGCGGCAACTGAGGGCTTTA
C tag	Tb427_060036900	Tb927.6.3180	TTACGAGCGGGACTGCGACGTTCGTGCCTGggttctggtagtggttccgg	AAGCCTCTGCCGACACGCACATTTCTTCCGccaatttgagagacctgtgc	gaaattaatacgactcactataggCAATGTGCAGAAGCATAAATgttttagagctagaaatagc	TGTCCAATTGTCGTGGAGCGGC	TCACCCACCTCCCTTTCTGTGT
N tag	Tb427_110169500	Tb927.11.15100	CTACTTACCCACTGCAGTTTTTTTATTATTgtataatgcagacctgctgc	ATCGGCAAAGTTCTTGTGGACAACGGCCATactacccgatcctgatccag	gaaattaatacgactcactataggCGGTATTACATCAAGTAAAGgttttagagctagaaatagc	agggcgttgtcggactaccact	CCACTGAGCCACGTTCGCAACT
