# Supplementary figures and images for: Profiling the bloodstream form and procyclic form Trypanosoma brucei cell cycle using single-cell transcriptomics
Source: eLife journal article supplement (doi:10.7554/elife.86325), 2023-05-11

A

PCF

BSF

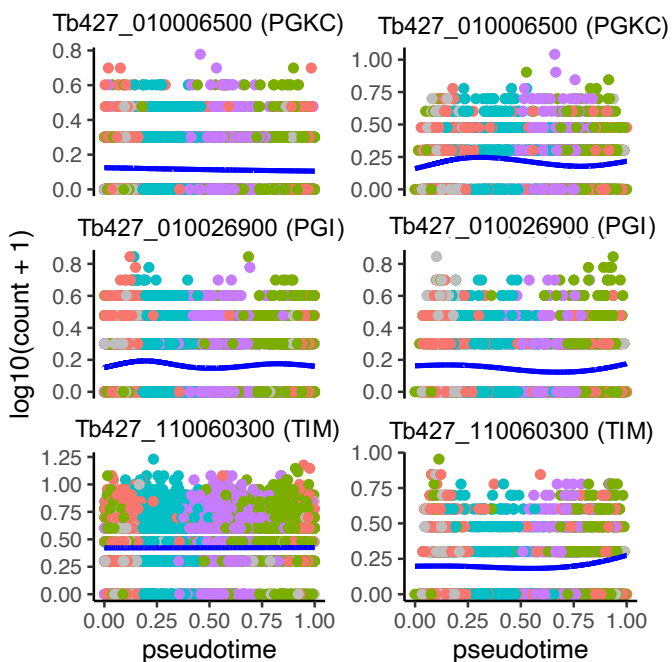

B

PCF

BSF

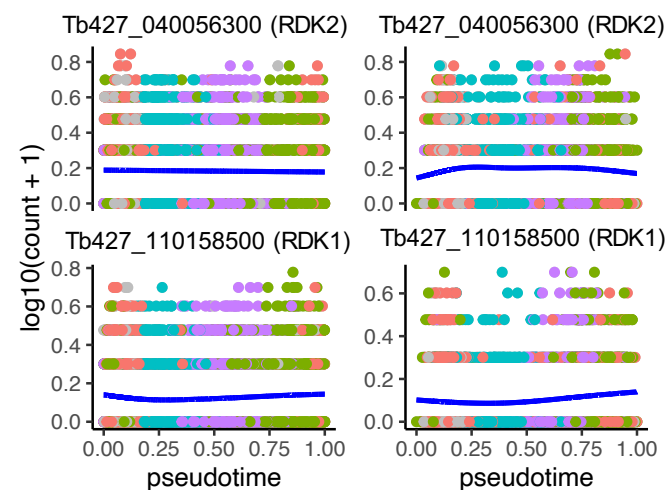

● early G1  
 ● late G1  
 ● S  
 ● G2M  
 ● unlabeled

C

PCF

BSF

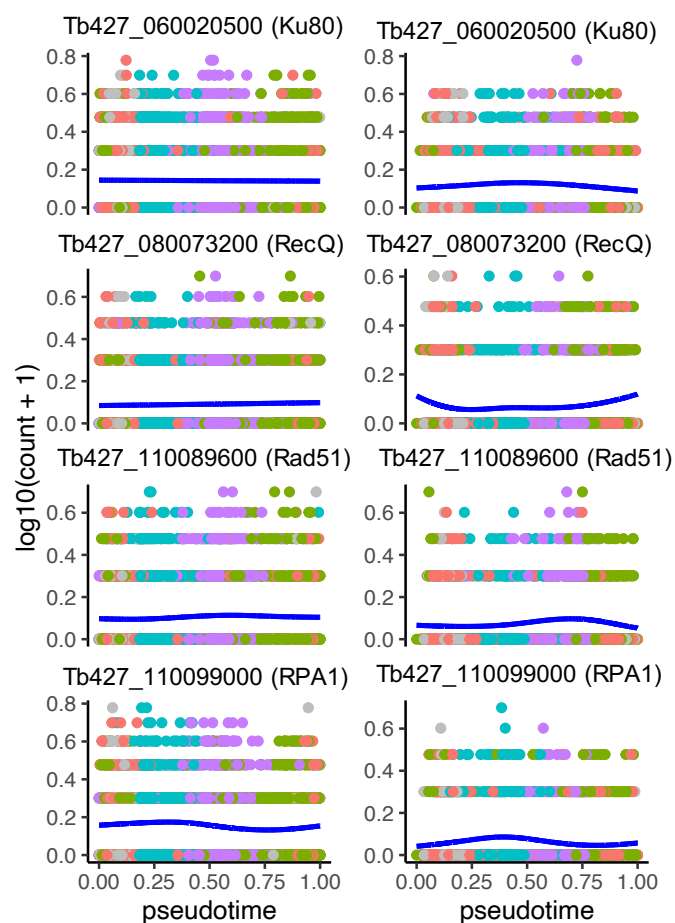

D

PCF

BSF

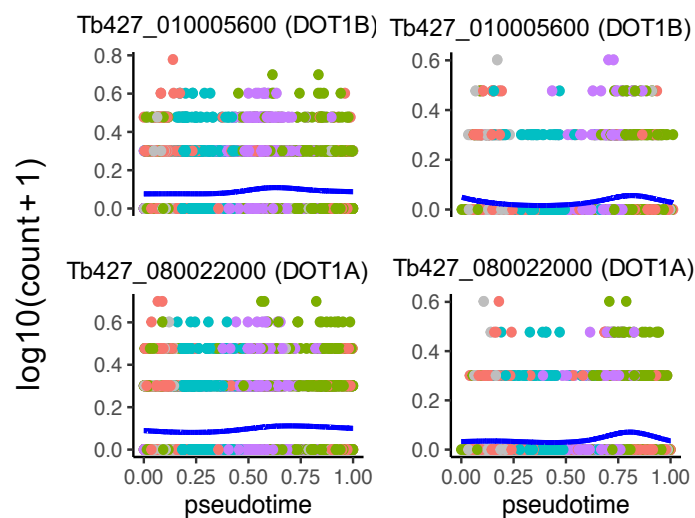

Supplement: supp [file elife-86325-supp-v1.zip]

A

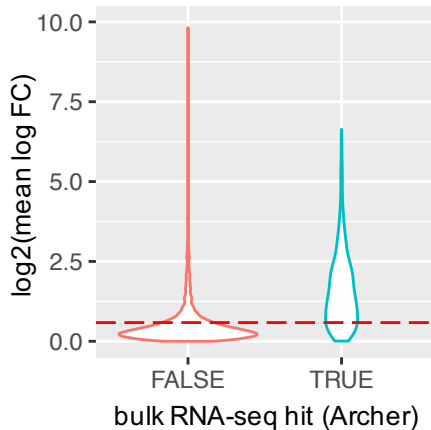

B

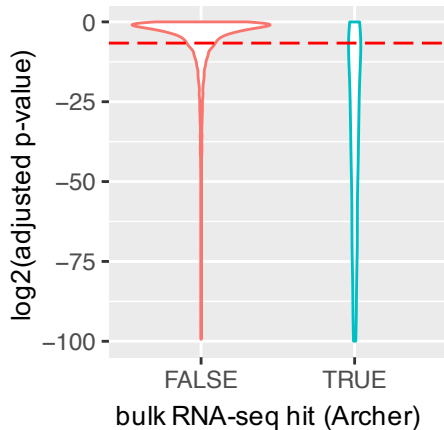

Supplement: supp [file elife-86325-supp-v1.zip]

A

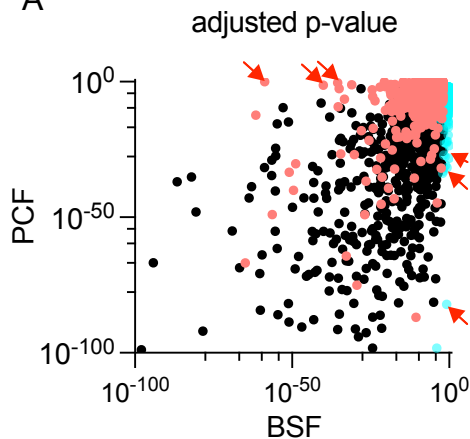

B

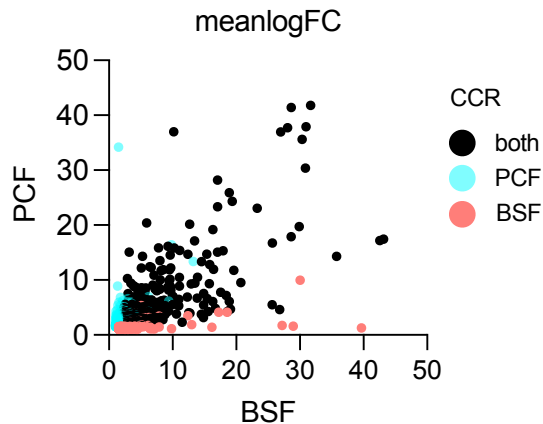

C

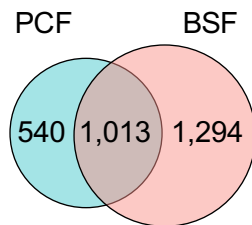

D

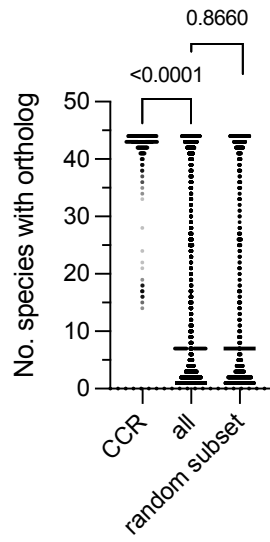

E

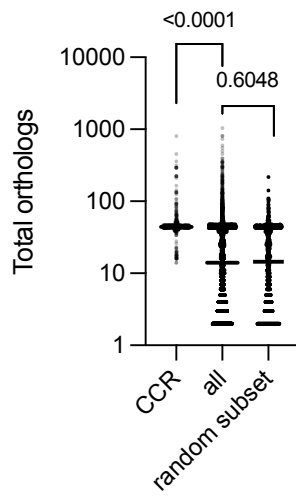

Supplement: supp [file elife-86325-supp-v1.zip]

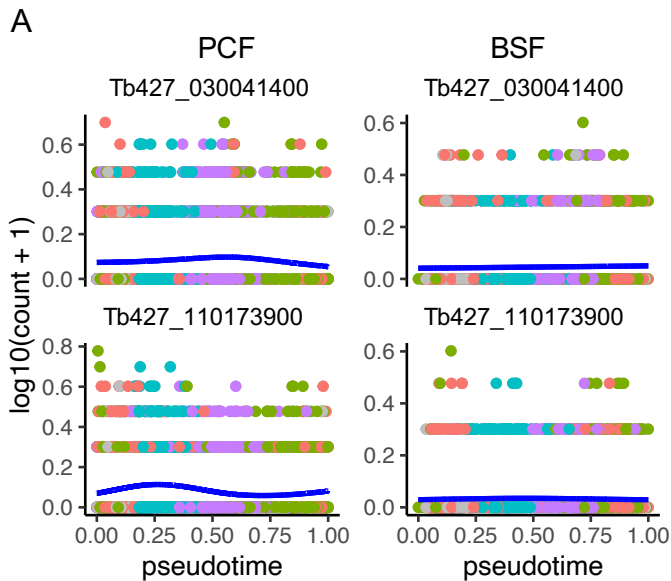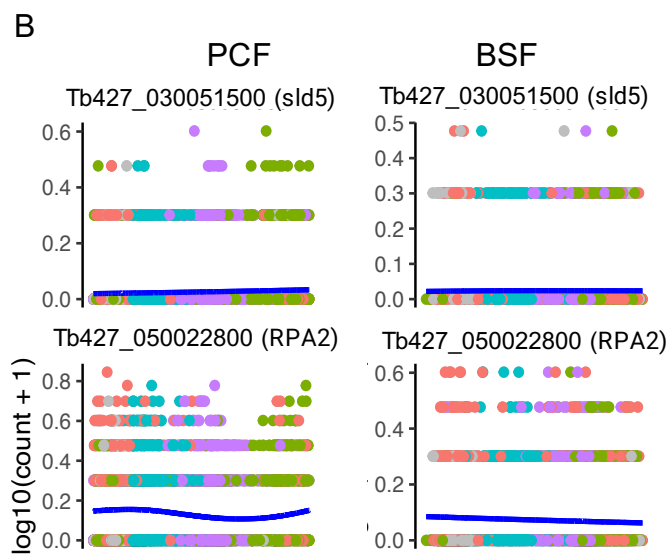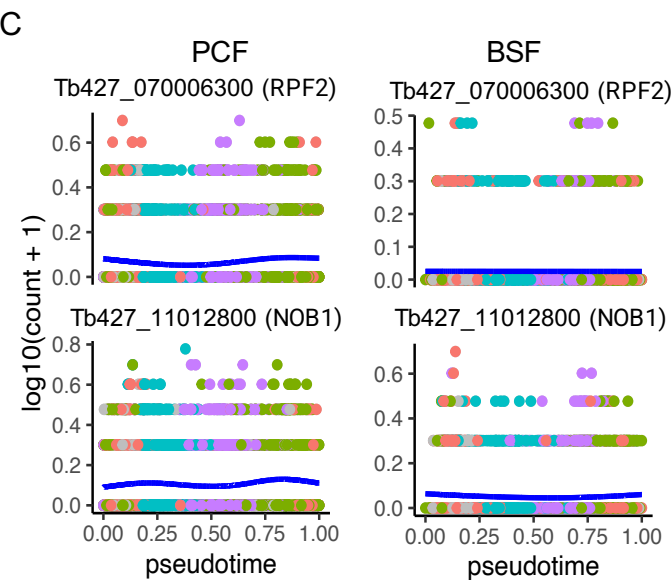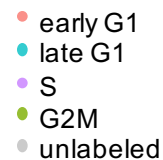

Supplement: supp [file elife-86325-supp-v1.zip]

A

PCF

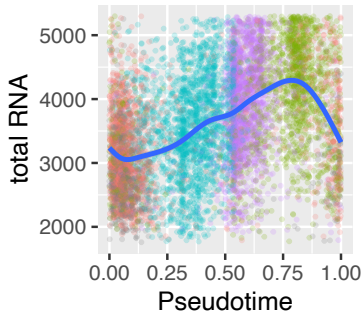

B

BSF

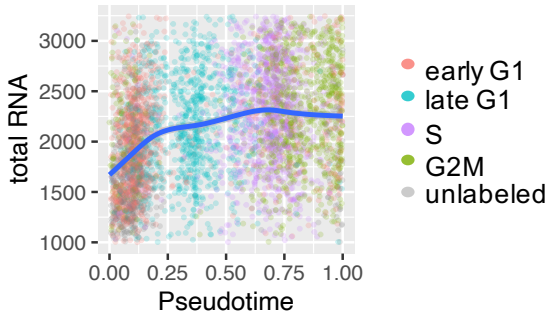

Supplement: supp [file elife-86325-supp-v1.zip]

A

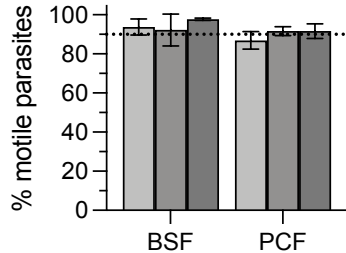

B

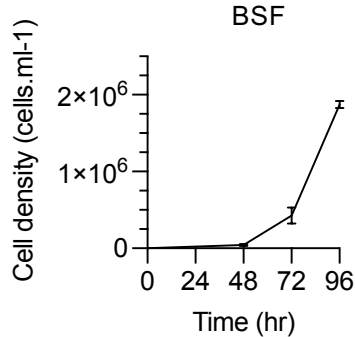

C

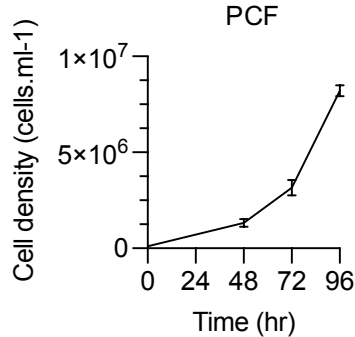

Supplement: supp [file elife-86325-supp-v1.zip]

A

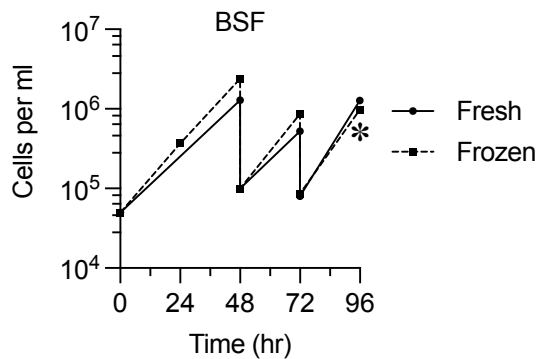

B

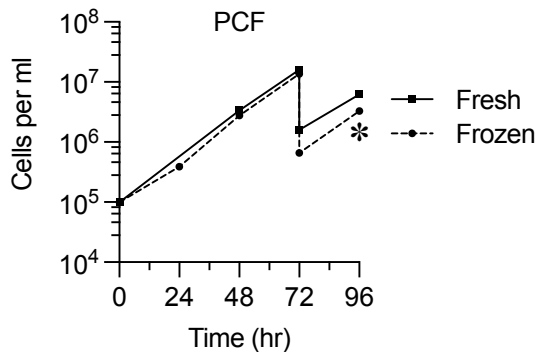

C

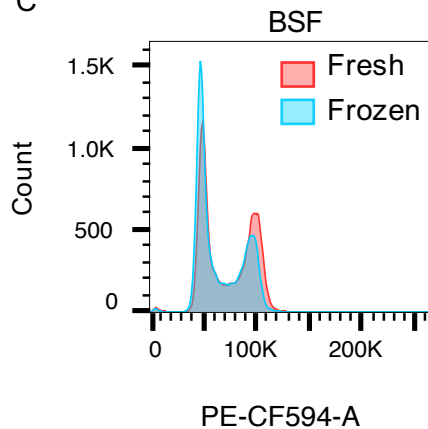

D

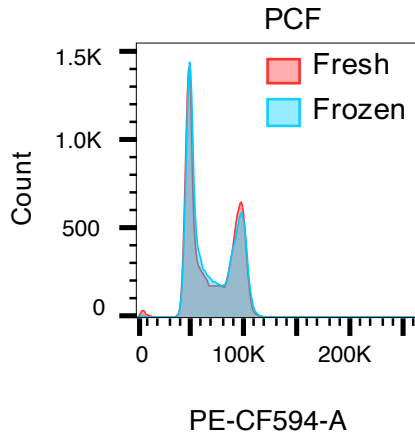

Supplement: supp [file elife-86325-supp-v1.zip]

proteomics (Benz)

proteomics (Crozier)

scRNA-seq

RNA-seq (Archer)

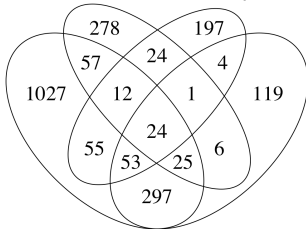

Supplement: supp [file elife-86325-supp-v1.zip]

A

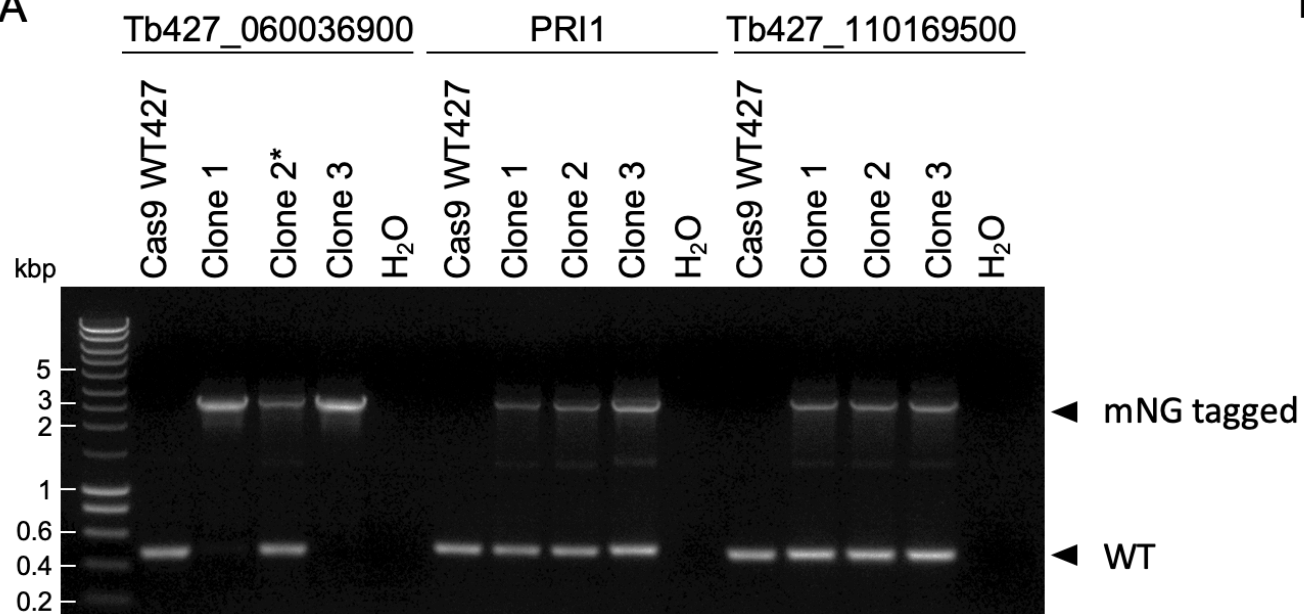

B

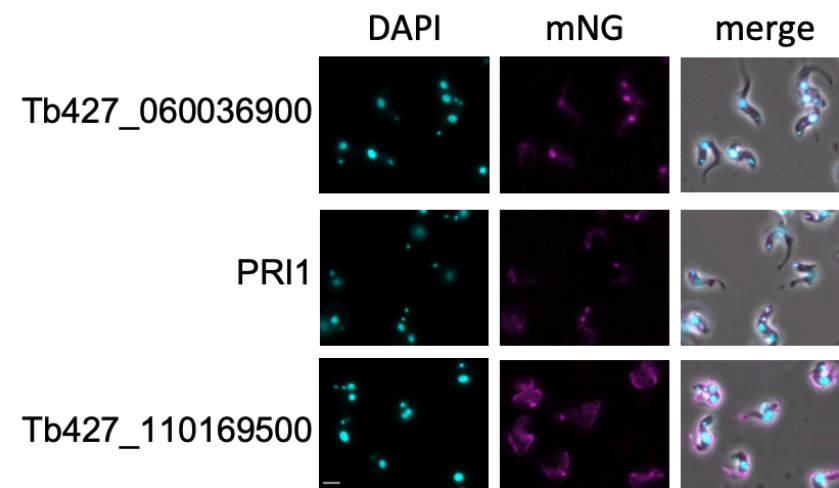

C

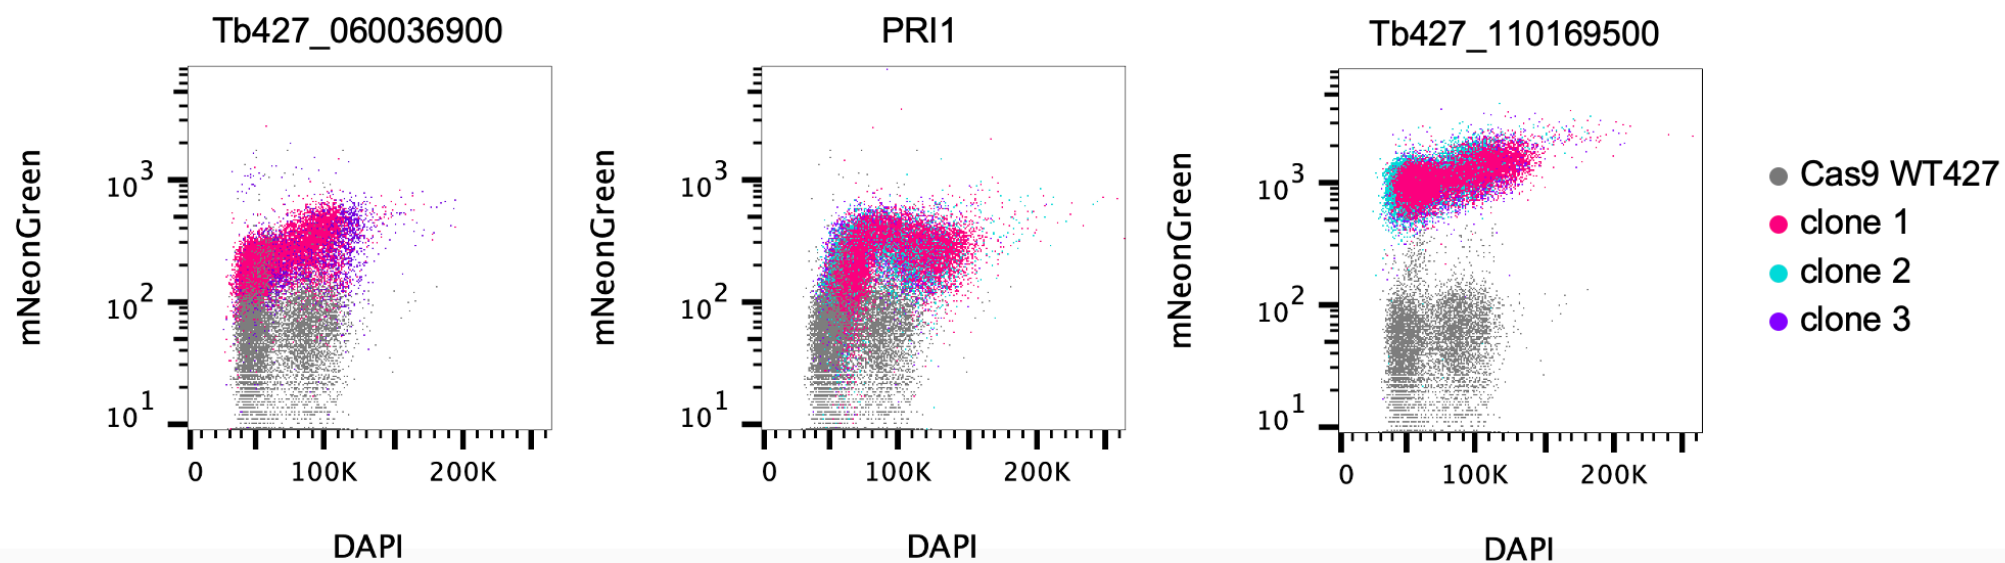

Supplement: supp [file elife-86325-supp-v1.zip]
